# Supplementary material for: Integrated agronomic, physiological, microstructure, and whole-transcriptome analyses reveal the role of biomass accumulation and quality formation during Se biofortification in alfalfa
Source: Front Plant Sci. 2023 Jul 20;14:1198847. doi: 10.3389/fpls.2023.1198847 (PMC10400095; doi:10.3389/fpls.2023.1198847)
Supplement: Supplementary Table S1 — List of primers used in qRT-PCR. [file Table_1.xlsx]

## Sheet: Sheet1
	Unigene ID	Forward primer (5'→3')	Reverse primer (5'→3')
miRNA	mtr-MIR2678-p5	GGCAGAAGGATCAACATCATAGA
	PC-3p-60657_85	CGTCCTCAGGCTCATTACTT
	gra-MIR8782-p3_2ss13TC17CT	GCGGTAGTAGTTTTCTCTTGTT
	gma-miR9749_L+1R-1	GCCTTCTTCTTTCACCTTTCC
	gma-miR172h-5p_R-1	ACGGCAGCATCAAGATTCAC
	PC-5p-11868_39	TCTCACAGCAGTTTCAAGGACC
lncRNA	MSTRG.76606.1	ATCCTCTCCAAAAATTCCCTCCC	ACAAGGTGTTTAAGGTCCTCCTC
	MSTRG.117981.1	TGTGAAGTCATAAGAAGTCGTCCA	AGCCCCCAACATGAATGAGTATG
	MSTRG.43704.1	GATTCTTCACTCCCCTAACTGCA	AATCAAACCACTGCGTATGTGTG
	MSTRG.71777.1	CGTCAACACGGTAACAAAATCCA	TCTGTTGAGATCTGCAGGTTTCA
	MSTRG.515.1	AGCTTTTCACTCTGATGTAGCCA	TCGCCTGAAAAACCAAACAGATC
circRNA	circRNA31	CTGCTTCTGTTTGATACCGGCTG	TGGGTCTCCATCGTTCCAATTC
	circRNA52	ACTACTCTGTCACAGCTCCA	TCTTCCACCGCCAAAGTCTC
