# Supplementary material for: Integrated agronomic, physiological, microstructure, and whole-transcriptome analyses reveal the role of biomass accumulation and quality formation during Se biofortification in alfalfa
Source: Front Plant Sci. 2023 Jul 20;14:1198847. doi: 10.3389/fpls.2023.1198847 (PMC10400095; doi:10.3389/fpls.2023.1198847)
Supplement: Supplementary Table S2 — Identification of known and novel miRNA in alfalfa under Se biofortification. [file Table_2.xlsx]

## Sheet: Sheet1
Item	Description
Pre-miRNA Index	Pre-miRNA Cluster Index
miRNA_Index	mature miRNA
miR_name	The miR_name is composed of the 1st known miR name in a cluster, a underscore, and a matching annotation: such as
	L-n means the miRNA_seq (detected) is n base less than known rep_miRSeq in the left side;
	R-n means the miRNA_seq (detected) is n base less than known rep_miRSeq in the right side;
	L+n means the miRNA_seq (detected) is n base more than known rep_miRSeq in the left side;
	R+n means the miRNA_seq (detected) is n base more than known rep_miRSeq in the right side;
	2ss5TC13TA means 2 substitution (ss), which are T->C at position 5 and T->A at position 13
	if there is no matching annotation, the miRNA_seq (detected) is exactly same as known rep_miRSeq.
	New discovered 5p/3p sequence has been annotated as p3/p5: which is directly differentiate with the reported sequences,
miR_seq	is a read at 5' or 3' of maximum mapped score in each cluster.
len	miR_seq length
genome ID	Reference Genome Information
strand	strand "+" or "-"
start	pre-miRNA start position
end	Pre-miRNA end position
pre-miRNA_seq	pre-miRNA sequence
#mir/MIR	mapped mir numbers in miRbase, the number in this item eaquals to the sum of mirIDs
mirIDs	is all mirID in a cluster, seprated by ,
rep_mirID	is the representative known mirID
rep_mirSeq	is the representative known mir sequence
rep_miRID	is the representative known miRID
rep_miRSeq	is the representative known miR sequence
type	is 5' or 3', which means the cluster appears at 5' or 3' end
Sequence in miRbase	New, miRNA identified in this study and not reported in miRBase,mainly for new reported 5p or 3p sequence; Diff, confirming miRNA sequences in miRBase, but different sequences are reported in our study; and Yes, confirming miRNA sequences in miRBase.
	gp2a:Reads were mapped to miRNAs/pre-miRNAs of selected species in miRbase and the mapped pre-miRNAs were not further mapped to genome, but the reads (and of course the miRNAs of the pre-miRNAs) were mapped to genome. The extended genome sequences from the genome loci may form hairpins.
	gp2b:Reads were mapped to miRNAs/pre-miRNAs of selected species in miRbase and the mapped pre-miRNAs were not further mapped to genome, but the reads (and of course the miRNAs of the pre-miRNAs) were mapped to genome. The extended genome sequences from the genome loci may not form hairpins.
	gp1:Reads were mapped to miRNAs/pre-miRNAs of specific species in miRbase and the pre-miRNAs were further mapped to genome & EST.
	gp3:Reads were mapped to miRNAs/pre-miRNAs of selected species in miRbase and the mapped pre-miRNAs were not further mapped to genome, and the reads were not mapped to genome, either. but the reads were mapped to the miRNAS(Matures)
	gp4:Reads were not mapped to pre-miRNAs of selected species in miRbase. But the reads were mapped to genome & the extended genome sequences from genome may form hairpins.
SS	Secondary Structure
	Criteria:
	1.number of nucleotides in one bulge in stem : <= 12
	2.number of base pairs in the stem region of the predicted hairpin : >= 16
	3.cutoff of free energy : kCal/mol <= -15
	4.length of hairpin : up and down stems + terminal loop >= 50
	8.number of biased bulges in mature region : <= 2
	10.number of base pairs in the mature region of the predicted hairpin : >= 12
	11.percent of mature in stem : >= 80
hairpinLen	pre-miRNA length
CG%	GC Content
dG	Free energy
MFEI	MFEI = -dG*100/mirLen/CG%. Reference: Cell. Mol. Life Sci. 63 (2006) 246-254.
raw	Raw data; from #reads(all),is the number of reads for isoform at 5' or 3' end.
norm	Normalized data
Expression Level	High:The number of reads in the following reported miRNAs is higher than the average copy of the data set.Medium:The number of reads in the following reported miRNAs is higher than 10 and less than average copy of the data set.Low:The number of reads in the following reported miRNAs is less than 10
Summary of known and predicted miRNA in this study.
Pre-miRNA Index	miRNA_Index	miR_name	miR_seq	len	genomeID	strand	start	end	pre-miRNA_seq	#mir/MIR	mirIDs,	rep_mirID	rep_mirSeq	rep_miRID	rep_miRSeq	type	Sequence in miRbase	group	SS	hairpinLen	CG%	dG	MFEI	CK1(raw)	CK2(raw)	CK3(raw)	Low_Se1(raw)	Low_Se2(raw)	Low_Se3(raw)	CK1(norm)	CK2(norm)	CK3(norm)	Low_Se1(norm)	Low_Se2(norm)	Low_Se3(norm)	Expression level
1	1	mtr-miR156b-5p	TGACAGAAGAGAGTGAGCAC	20	chr1.1	+	6243691	6243796	agggtaagggaggTGACAGAAGAGAGTGAGCACacatggtactttcttgaatgatgtttcattctcgaagctatgtgtGCTCACTCTCTATCTGTCACCccatcac	18	mtr-MIR156b,gma-MIR156w,gma-MIR156y,gma-MIR156x,mdm-MIR156m,mdm-MIR156b,mdm-MIR156g,mdm-MIR156i,stu-MIR156k,stu-MIR156h,mes-MIR156g,mes-MIR156c,mes-MIR156d,fve-MIR156d,bra-MIR156d,cpa-MIR156c,ghr-MIR156a,rco-MIR156c,	mtr-MIR156b	ggaggTGACAGAAGAGAGTGAGCACacatggtactttcgtgtatgatgtttcattctcgaagctatgtgTGCTCACTCTCTATCTGTCACCccat	mtr-miR156b-5p	TGACAGAAGAGAGTGAGCAC	5'	Yes	gp1	........((.(((((((((((((((((((((((((((((...(((..((((((....))))))..))))))))))))))))))))))).))))))))))).....	93	46.2	-64.1	1.3	11510	8035.94	10013.2	7681.92	12613.3	5437.25	13498.4	7543.07	11428.9	7811.98	12854.2	5264.85	high
1	2	mtr-miR156b-3p_L-1_1ss5CT	GCTTACTCTCTATCTGTCACC	21	chr1.1	+	6243691	6243796	agggtaagggaggTGACAGAAGAGAGTGAGCACacatggtactttcttgaatgatgtttcattctcgaagctatgtgtGCTCACTCTCTATCTGTCACCccatcac	18	mtr-MIR156b,gma-MIR156w,gma-MIR156y,gma-MIR156x,mdm-MIR156m,mdm-MIR156b,mdm-MIR156g,mdm-MIR156i,stu-MIR156k,stu-MIR156h,mes-MIR156g,mes-MIR156c,mes-MIR156d,fve-MIR156d,bra-MIR156d,cpa-MIR156c,ghr-MIR156a,rco-MIR156c,	mtr-MIR156b	ggaggTGACAGAAGAGAGTGAGCACacatggtactttcgtgtatgatgtttcattctcgaagctatgtgTGCTCACTCTCTATCTGTCACCccat	mtr-miR156b-3p	TGCTCACTCTCTATCTGTCACC	3'	Diff	gp1	........((.(((((((((((((((((((((((((((((...(((..((((((....))))))..))))))))))))))))))))))).))))))))))).....	93	46.2	-64.1	1.3	1060.33	1070.67	1030	881	1549	883.333	1243.51	1005	1175.63	895.916	1578.59	855.325	high
2	3	mtr-miR156b-5p	TGACAGAAGAGAGTGAGCAC	20	chr8.1	+	2529932	2530022	gatatTGACAGAAGAGAGTGAGCACatgctgcagtgattgtatgatagcatacaattcttggtgcgtGCTCACTTCTCTTTCTGTCATCtt	2	mtr-MIR156i,cpa-MIR156b,	mtr-MIR156i	gatatTGACAGAAGAGAGTGAGCACatgctgcagtgattgtatgatagcatacaattcttggtgcgTGCTCACTTCTCTTTCTGTCATCttat	mtr-miR156b-5p	TGACAGAAGAGAGTGAGCAC	5'	Yes	gp1	.....((((((((((((((((((((..((..(((..((((((((....))))))))..)))..))))))))))).))))).))))))....	82	41.8	-42.4	1.1	11510	8035.94	10013.2	7681.92	12613.3	5437.25	13498.4	7543.07	11428.9	7811.98	12854.2	5264.85	high
2	4	mtr-miR156i-3p_L-1	GCTCACTTCTCTTTCTGTCATC	22	chr8.1	+	2529932	2530022	gatatTGACAGAAGAGAGTGAGCACatgctgcagtgattgtatgatagcatacaattcttggtgcgtGCTCACTTCTCTTTCTGTCATCtt	2	mtr-MIR156i,cpa-MIR156b,	mtr-MIR156i	gatatTGACAGAAGAGAGTGAGCACatgctgcagtgattgtatgatagcatacaattcttggtgcgTGCTCACTTCTCTTTCTGTCATCttat	mtr-miR156i-3p	TGCTCACTTCTCTTTCTGTCATC	3'	Diff	gp1	.....((((((((((((((((((((..((..(((..((((((((....))))))))..)))..))))))))))).))))).))))))....	82	41.8	-42.4	1.1	39	38	46	21	70	72	45.7375	35.6694	52.5037	21.3555	71.3371	69.7171	middle
3	5	mtr-miR156b-5p	TGACAGAAGAGAGTGAGCAC	20	chr3.1	+	82539078	82539182	gggtaagggtggTGACAGAAGAGAGTGAGCACacatggtgttttcttgcacgatgttgtttcatgcttgaagctatatgtGCTTACTCTCTATCTGTCACCccac	5	mtr-MIR156c,mdm-MIR156o,stu-MIR156g,stu-MIR156j,ppe-MIR156d,	mtr-MIR156c	ggtggTGACAGAAGAGAGTGAGCACacatggtgttttcttgcacgattatgtttcctgcttgaagctatatgTGCTTACTCTCTATCTGTCACCccac	mtr-miR156b-5p	TGACAGAAGAGAGTGAGCAC	5'	Yes	gp1	.......((.((((((((((((((((((((((((((.((((......)))).)))..((((((....))))))....)))))))))))))).)))))))))))..	96	46.7	-55.3	1.1	11510	8035.94	10013.2	7681.92	12613.3	5437.25	13498.4	7543.07	11428.9	7811.98	12854.2	5264.85	high
3	6	mtr-miR156c-3p_L-1	GCTTACTCTCTATCTGTCACC	21	chr3.1	+	82539078	82539182	gggtaagggtggTGACAGAAGAGAGTGAGCACacatggtgttttcttgcacgatgttgtttcatgcttgaagctatatgtGCTTACTCTCTATCTGTCACCccac	5	mtr-MIR156c,mdm-MIR156o,stu-MIR156g,stu-MIR156j,ppe-MIR156d,	mtr-MIR156c	ggtggTGACAGAAGAGAGTGAGCACacatggtgttttcttgcacgattatgtttcctgcttgaagctatatgTGCTTACTCTCTATCTGTCACCccac	mtr-miR156c-3p	TGCTTACTCTCTATCTGTCACC	3'	Diff	gp1	.......((.((((((((((((((((((((((((((.((((......)))).)))..((((((....))))))....)))))))))))))).)))))))))))..	96	46.7	-55.3	1.1	1060.33	1070.67	1030	881	1549	883.333	1243.51	1005	1175.63	895.916	1578.59	855.325	high
4	7	mtr-miR156g-5p	TTGACAGAAGATAGAGGGCAC	21	chr6.1	-	72480951	72481066	ggttgTTGACAGAAGATAGAGGGCACtaaggatgatatgcatacacatatacaacatggaggaagagcttaattgcatttcatttcctttgtGCCCTCTAGACTTCTGTCATCacc	1	mtr-MIR156g,	mtr-MIR156g	ggttgTTGACAGAAGATAGAGGGCACtaaggatgatatgcatacacatatatatacaacatggaggaggagcttaattgcatttcatttcctttgtGCTCTCTAGACTTCTGTCATCacc	mtr-miR156g-5p	TTGACAGAAGATAGAGGGCAC	5'	Yes	gp1	((.((.(((((((((.((((((((((.((((((((.(((((.................(((......)))...))))).)))..))))).))))))))))..))))))))).))))	116	41.4	-48.5	1	3217.5	1939	2806.5	1643	1569	1599.5	3773.34	1820.08	3203.29	1670.82	1598.97	1548.78	high
4	8	mtr-miR156g-3p_1ss3TC	GCCCTCTAGACTTCTGTCATC	21	chr6.1	-	72480951	72481066	ggttgTTGACAGAAGATAGAGGGCACtaaggatgatatgcatacacatatacaacatggaggaagagcttaattgcatttcatttcctttgtGCCCTCTAGACTTCTGTCATCacc	1	mtr-MIR156g,	mtr-MIR156g	ggttgTTGACAGAAGATAGAGGGCACtaaggatgatatgcatacacatatatatacaacatggaggaggagcttaattgcatttcatttcctttgtGCTCTCTAGACTTCTGTCATCacc	mtr-miR156g-3p	GCTCTCTAGACTTCTGTCATC	3'	Diff	gp1	((.((.(((((((((.((((((((((.((((((((.(((((.................(((......)))...))))).)))..))))).))))))))))..))))))))).))))	116	41.4	-48.5	1	461	505	390	259	343	378	540.641	474.027	445.14	263.385	349.552	366.015	middle
5	9	gma-miR156a	TGACAGAAGAGAGTGAGCAC	20	chr1.3	+	6401437	6401541	gtaagggaggTGACAGAAGAGAGTGAGCACacatggtactttcttgaatgatgtttcattctcgaagctatgtgtGCTCACTCTCTATCTGTCACCccaccacca	5	gma-MIR156v,ptc-MIR156b,nta-MIR156e,nta-MIR156d,cme-MIR156a,	gma-MIR156v	taagggaggTGACAGAAGAGAGTGAGCACacataatactttcttgtaagataaagattcatgcttgaagttatgtgtgctcactctctatctgtcaccccacca	gma-miR156a	TGACAGAAGAGAGTGAGCAC	5'	Yes	gp1	.....((.(((((((((((((((((((((((((((((...(((..((((((....))))))..))))))))))))))))))))))).))))))))))).......	93	46.7	-64.1	1.3	11510	8035.94	10013.2	7681.92	12613.3	5437.25	13498.4	7543.07	11428.9	7811.98	12854.2	5264.85	high
5	10	cme-MIR156a-p3	GCTTACTCTCTATCTGTCACC	21	chr1.3	+	6401437	6401541	gtaagggaggTGACAGAAGAGAGTGAGCACacatggtactttcttgaatgatgtttcattctcgaagctatgtgtGCTCACTCTCTATCTGTCACCccaccacca	5	gma-MIR156v,ptc-MIR156b,nta-MIR156e,nta-MIR156d,cme-MIR156a,	cme-MIR156a	aaggggaggTGACAGAAGAGAGTGAGCACataaggtaactttcttgcatgttagggttcatgcttgaagctttatgtgcttactctctatctgtcacccaccaaaa	cme-MIR156a-p3	gcttactctctatctgtcacc	3'	New	gp1	.....((.(((((((((((((((((((((((((((((...(((..((((((....))))))..))))))))))))))))))))))).))))))))))).......	93	46.7	-64.1	1.3	1060.33	1070.67	1030	881	1549	883.333	1243.51	1005	1175.63	895.916	1578.59	855.325	high
6	11	mtr-miR156e	TTGACAGAAGATAGAGAGCAC	21	chr6.2	-	15471877	15471970	gtttgTTGACAGAAGATAGAGAGCACatctgaacaaacacagaagacattgtgtttgaacagttatgtgctccctgttcttctgccaacatact	1	mtr-MIR156f,	mtr-MIR156f	gtttgTTGACAGAAGATAGAGAGCACatctgaacaaacacaaaagacattgtgtttgaacagttgtgtgctctctgctcttctgccaacatact	mtr-miR156e	TTGACAGAAGATAGAGAGCAC	5'	Yes	gp1	((.(((((.((((((((((.(((((((((((..(((((((((......)))))))))..)))..)))))))).)))).)))))).))))).)).	93	40.4	-43.5	1.1	107.197	50.2727	63.1606	275.703	121.473	29.1	125.716	47.1894	72.0905	280.371	123.793	28.1773	middle
7	12	gma-miR156c	TTGACAGAAGATAGAGAGCAC	21	chr4.2	-	800715	800855	taaggttgTTGACAGAAGATAGAGAGCACagatgatgatatgcatttatatatatatgaggagctgcatggagatgaattttgtgcatatcactcctttgtgctctctatgcttctgtcatcaccttcatcctccaatttc	1	gma-MIR156d,	gma-MIR156d	ctacttggtaattaaggttgTTGACAGAAGATAGAGAGCACagatgatgatatgcatattatataatatatagcagggaactcatgatgaattgtgcatcttactcctttgtgctctctatacttctgtcatcaccttcagcctccatttc	gma-miR156c	TTGACAGAAGATAGAGAGCAC	5'	Yes	gp1	.((((.((.(((((((((((((((((((((((.((((((((((((...(((...((((........))))...)))......)))))))))).)).)))))))))))))).))))))))).))))))..............	126	38.3	-57.7	1.1	107.197	50.2727	63.1606	275.703	121.473	29.1	125.716	47.1894	72.0905	280.371	123.793	28.1773	middle
8	13	mtr-miR156b-5p	TGACAGAAGAGAGTGAGCAC	20	chr3.1	-	84132727	84132817	tagaaatTGACAGAAGAGAGTGAGCACacagagacatttatatagatgtatctttgcatttgtgtGCTCACTCATCTTTCTGTCAAAttcc	6	mtr-MIR156d,gma-MIR156k,gma-MIR156h,mes-MIR156e,cpa-MIR156a,rco-MIR156b,	mtr-MIR156d	gaaatTGACAGAAGAGAGTGAGCACatagacactcggtatagatgtatatcgttgcctttgcgTGCTCACTCATCTTTCTGTCAAAttcc	mtr-miR156b-5p	TGACAGAAGAGAGTGAGCAC	5'	Yes	gp1	..(((.((((((((((((((((((((((((((..((...((((....))))...))..))))))))))))))).)))).))))))).))).	88	36.3	-43.5	1.3	11510	8035.94	10013.2	7681.92	12613.3	5437.25	13498.4	7543.07	11428.9	7811.98	12854.2	5264.85	high
8	14	mtr-miR156d-3p_L-1	GCTCACTCATCTTTCTGTCAAA	22	chr3.1	-	84132727	84132817	tagaaatTGACAGAAGAGAGTGAGCACacagagacatttatatagatgtatctttgcatttgtgtGCTCACTCATCTTTCTGTCAAAttcc	6	mtr-MIR156d,gma-MIR156k,gma-MIR156h,mes-MIR156e,cpa-MIR156a,rco-MIR156b,	mtr-MIR156d	gaaatTGACAGAAGAGAGTGAGCACatagacactcggtatagatgtatatcgttgcctttgcgTGCTCACTCATCTTTCTGTCAAAttcc	mtr-miR156d-3p	TGCTCACTCATCTTTCTGTCAAA	3'	Diff	gp1	..(((.((((((((((((((((((((((((((..((...((((....))))...))..))))))))))))))).)))).))))))).))).	88	36.3	-43.5	1.3	17	20	27	25	0	18	19.9369	18.7733	30.8174	25.4233	0	17.4293	middle
9	15	stu-miR156e	TGACAGAAGAGAGTGAGCAC	20	chr3.4	+	91668629	91668717	TGACAGAAGAGAGTGAGCACacatggtgttttcttgcacgatgttgtttcatgcttgaagctatatgtgcttactctctatctgtcacc	1	stu-MIR156i,	stu-MIR156i	TGACAGAAGAGAGTGAGCACacatgatgttttctcgcatgatgtttatatgcttgaaactatgtgtGCTCACTGCTCTATCTGTCACC	stu-miR156e	TGACAGAAGAGAGTGAGCAC	5'	Yes	gp1	((((((((((((((((((((((((.((((......)))).)))..((((((....))))))....)))))))))))))).)))))))..	87	42.7	-45.3	1.2	11510	8035.94	10013.2	7681.92	12613.3	5437.25	13498.4	7543.07	11428.9	7811.98	12854.2	5264.85	high
10	16	gma-miR156b_L+1R-1	TTGACAGAAGAGAGAGAGCAC	21	chr3.1	-	44705958	44706067	tgagacatttcatgTTGACAGAAGAGAGAGAGCACaacccgggaatggttgtaaagagagtctttgcctttgttgggagtgtGCTCTCCCTTCTTCTGTCATCatcacat	7	gma-MIR156f,gma-MIR156b,mdm-MIR156u,mdm-MIR156v,mdm-MIR156t,mes-MIR156k,rco-MIR156e,	gma-MIR156b	tgatgtgagatatctcatgtTGACAGAAGAGAGAGAGCACAacccgggaatggctaaaggagtctttgcctttgttgggagtgtgccctctcttcctctgtcatcatcacattcacatgc	gma-miR156b	TGACAGAAGAGAGAGAGCACA	5'	Diff	gp1	...........(((.(((((((((((.(((((((((.((((...(..(..((((((.....))))))..)..)))))..)))))))))..))))))))))).))).....	94	45.5	-44.7	0.9	331.69	97.5	510.333	1028.17	115.5	26	388.992	91.52	582.486	1045.57	117.706	25.1756	high
10	17	mes-MIR156k-p3_1ss9GT	GCTCTCCCTTCTTCTGTCATC	21	chr3.1	-	44705958	44706067	tgagacatttcatgTTGACAGAAGAGAGAGAGCACaacccgggaatggttgtaaagagagtctttgcctttgttgggagtgtGCTCTCCCTTCTTCTGTCATCatcacat	7	gma-MIR156f,gma-MIR156b,mdm-MIR156u,mdm-MIR156v,mdm-MIR156t,mes-MIR156k,rco-MIR156e,	mes-MIR156k	tgTTGACAGAAGAGAGAGAGCACaacccgccattggctgaagagagtctttacttttgttgggagtgtgctctcccgtcttctgtcatca	mes-MIR156k-p3	gctctcccgtcttctgtcatc	3'	New	gp1	...........(((.(((((((((((.(((((((((.((((...(..(..((((((.....))))))..)..)))))..)))))))))..))))))))))).))).....	94	45.5	-44.7	0.9	46	18	99	171	21	5	53.9468	16.896	112.997	173.895	21.4011	4.84146	middle
11	18	mtr-miR156e	TTGACAGAAGATAGAGAGCAC	21	chr7.2	-	24477958	24478054	tgatgctgTTGACAGAAGATAGAGAGCACagatgatgaaatgcatggaaggcaatggcatctcattcctttgtgctctttattcttctgtcatcacc	12	mtr-MIR156h,gma-MIR156j,ptc-MIR156g,ptc-MIR156h,ptc-MIR156j,mdm-MIR156aa,mdm-MIR156q,mdm-MIR156s,mdm-MIR156y,mes-MIR156h,fve-MIR156g,aqc-MIR156b,	mtr-MIR156h	tgctgTTGACAGAAGATAGAGAGCACagatgatgaaatgcatggaaggcaatggcatctcattcctttgtGCTCTTTATTCTTCTGTCATCacc	mtr-miR156e	TTGACAGAAGATAGAGAGCAC	5'	Yes	gp1	......((.(((((((((((((((((((((((.(((((.((((((........)).)))).)))))..)))))))))))))).))))))))).))..	89	42.3	-42.1	1	107.197	50.2727	63.1606	275.703	121.473	29.1	125.716	47.1894	72.0905	280.371	123.793	28.1773	middle
12	19	mes-miR156h	TTGACAGAAGATAGAGAGCAC	21	chr7.1	-	22144196	22144281	TTGACAGAAGATAGAGAGCACagatgatgaaaatgcatcgaaggaaatggcatctcattcctttgtgctctttattcttctgtcat	1	mes-MIR156j,	mes-MIR156j	TTGACAGAAGATAGAGAGCACagatgatgatgaaatgcataaagtttgcatctcactcctttgtgctctctactcttctgtcat	mes-miR156h	TTGACAGAAGATAGAGAGCAC	5'	Yes	gp1	.(((((((((((((((((((((((.(((((..((((.((....))....)))).)))))..)))))))))))))).))))))))).	84	38.4	-40.7	1.2	107.197	50.2727	63.1606	275.703	121.473	29.1	125.716	47.1894	72.0905	280.371	123.793	28.1773	middle
13	20	cpa-miR156e	TTGACAGAAGATAGAGAGCAC	21	chr4.1	-	1040814	1040920	TTGACAGAAGATAGAGAGCACagatgatgatatgcatttatatatatatgcatggagatgaattttgtgcatatcactcctttgtGCTCTCTATGCTTCTGTCATCa	1	cpa-MIR156f,	cpa-MIR156f	TTGACAGAAGATAGAGAGCACagatgatgatatgcaattcattaatggatcagatcaactctctgcatctcactcctttgtgctctctatgcttctgtcatca	cpa-miR156e	TTGACAGAAGATAGAGAGCAC	5'	Yes	gp1	.(((((((((((((((((((((((.((((((((((((((((...(((....)))...)))).....)))))))))).)).)))))))))))))).)))))))))...	103	35.5	-50	1.3	107.197	50.2727	63.1606	275.703	121.473	29.1	125.716	47.1894	72.0905	280.371	123.793	28.1773	middle
13	21	cpa-MIR156f-p3	GCTCTCTATGCTTCTGTCATC	21	chr4.1	-	1040814	1040920	TTGACAGAAGATAGAGAGCACagatgatgatatgcatttatatatatatgcatggagatgaattttgtgcatatcactcctttgtGCTCTCTATGCTTCTGTCATCa	1	cpa-MIR156f,	cpa-MIR156f	TTGACAGAAGATAGAGAGCACagatgatgatatgcaattcattaatggatcagatcaactctctgcatctcactcctttgtgctctctatgcttctgtcatca	cpa-MIR156f-p3	gctctctatgcttctgtcatc	3'	New	gp1	.(((((((((((((((((((((((.((((((((((((((((...(((....)))...)))).....)))))))))).)).)))))))))))))).)))))))))...	103	35.5	-50	1.3	0	0	0	0	5	0	0	0	0	0	5.09551	0	low
14	22	mtr-miR159b_L-1_1ss7GC	TTGGACTGAAGGGAGCTCCA	20	chr8.1	+	73551689	73551872	aacctaatttggggctctccgcactccaagtctaaaaggaggtgatagtttacccttgctgcttgttcatggttacctttgactttgcacattggaaacttgccaaagtcatgggtttgcatgaatttggagatagggttgccttgatctttttgtaTTGGAGTGAAGGGAGCTCCAaaattgg	1	mtr-MIR159b,	mtr-MIR159b	aacctaatttggggctctccgcactccaagtctaaaaggaggtgatagtttacccttgctgcttgttcatggttacctttgactttgcacattggaaacttaccaaagtcatgggtttgcatgaatttggagatagggttgccttgatctttttgtATTGGAGTGAAGGGAGCTCCAaaattggac	mtr-miR159b	ATTGGAGTGAAGGGAGCTCCA	3'	Diff	gp1	..((...((((((((((((..((((((((...((((((((......((...(((((..((.((.(((((((...(((..((((((((((...........)).))))))))..)))...)))))))..))))..)))))...))...))))))))..))))))))..))))))))))))...))	182	43.5	-72.1	0.9	1	0	2.5	4.33333	3	1.16667	1.17276	0	2.85346	4.4067	3.05731	1.12967	low
15	23	mtr-MIR159a-p5	GAGCTTCCTTTAGTCCAAATA	21	chr6.2	-	79210772	79210955	ggggtgGAGCTTCCTTTAGTCCAAATAtggatgttgctatgttgatagagctgcttagctatggatccctcaactctacccatcttgttctttgtggtagttttgtggcttccatatctagggagccttatcaccttttagtataatctttcTTTGGATTGAAGGGAGCTCTAcaccttcctct	1	mtr-MIR159a,	mtr-MIR159a	ggggtggagcttcctttagtccaaatatggatcttgctatgttgatagagctgcttagctatgggtccctcaactctacccatcttgttctttgtggtagttttgtggcttccatatctagggagccttatcacctttagtttaatctttcTTTGGATTGAAGGGAGCTCTAcatcttgctct	mtr-MIR159a-p5	gagcttcctttagtccaaata	5'	New	gp1	(((((((((((((((((((((((((...((((..(((((...(((((..(((.(((((.((((((..((.(((..(((((((..........)).)))))..))).))..)))))).))))).)))..))))).....)))))..))))...)))))))))))))))))))))).)))......	178	42.9	-84.4	1.1	118	123	104	92	153	136	138.385	115.456	118.704	93.5576	155.923	131.688	middle
15	24	mtr-miR159a	TTTGGATTGAAGGGAGCTCTA	21	chr6.2	-	79210772	79210955	ggggtgGAGCTTCCTTTAGTCCAAATAtggatgttgctatgttgatagagctgcttagctatggatccctcaactctacccatcttgttctttgtggtagttttgtggcttccatatctagggagccttatcaccttttagtataatctttcTTTGGATTGAAGGGAGCTCTAcaccttcctct	1	mtr-MIR159a,	mtr-MIR159a	ggggtggagcttcctttagtccaaatatggatcttgctatgttgatagagctgcttagctatgggtccctcaactctacccatcttgttctttgtggtagttttgtggcttccatatctagggagccttatcacctttagtttaatctttcTTTGGATTGAAGGGAGCTCTAcatcttgctct	mtr-miR159a	TTTGGATTGAAGGGAGCTCTA	3'	Yes	gp1	(((((((((((((((((((((((((...((((..(((((...(((((..(((.(((((.((((((..((.(((..(((((((..........)).)))))..))).))..)))))).))))).)))..))))).....)))))..))))...)))))))))))))))))))))).)))......	178	42.9	-84.4	1.1	150278	132305	128620	119403	133681	121435	176239	124190	146804	121425	136235	117585	high
16	25	mtr-MIR160f-p5	TGCCTGGCTCCCTGCATGCCA	21	chr8.1	+	530968	531070	aatgttgtgttTGCCTGGCTCCCTGCATGCCAtataagaggcttctcaaaatggttgacgacccttttacttgGCGTGAAGGGAGTCAAGCAGGcagcctaat	1	mtr-MIR160f,	mtr-MIR160f	aatgttgtgtttgcctggctccctgcatgccatataagaggcttctcaaaatggttgacgacccttttacttgGCGTGAAGGGAGTCAAGCAGGcagcctaatc	mtr-MIR160f-p5	tgcctggctccctgcatgcca	5'	New	gp1	...(((((..((((.(((((((((.(((((((..(((((((.(..((((.....))))..).)))))))..))))))).))))))))).))))))))).....	95	48.5	-48	1	5	8	8	11	0	12	5.86378	7.50934	9.13107	11.1862	0	11.6195	middle
16	26	mtr-miR160f	GCGTGAAGGGAGTCAAGCAGG	21	chr8.1	+	530968	531070	aatgttgtgttTGCCTGGCTCCCTGCATGCCAtataagaggcttctcaaaatggttgacgacccttttacttgGCGTGAAGGGAGTCAAGCAGGcagcctaat	1	mtr-MIR160f,	mtr-MIR160f	aatgttgtgtttgcctggctccctgcatgccatataagaggcttctcaaaatggttgacgacccttttacttgGCGTGAAGGGAGTCAAGCAGGcagcctaatc	mtr-miR160f	GCGTGAAGGGAGTCAAGCAGG	3'	Yes	gp1	...(((((..((((.(((((((((.(((((((..(((((((.(..((((.....))))..).)))))))..))))))).))))))))).))))))))).....	95	48.5	-48	1	16	11	10	14	7	18	18.7641	10.3253	11.4138	14.237	7.13371	17.4293	middle
17	27	mtr-miR160a	TGCCTGGCTCCCTGTATGCCA	21	chr1.2	-	49746053	49746169	atatatatactaattacgTGCCTGGCTCCCTGTATGCCAtttgtagagttcatcaagatgttgatgactttaatgaatggcgtgcgaggagccatgcatgttgtgtatattttctat	3	mtr-MIR160a,gma-MIR160c,gma-MIR160e,	mtr-MIR160a	agatatatatactaattgcgTGCCTGGCTCCCTGTATGCCAtttgtagagttcatcaagatgttgatgactttaatgaatggcgtgcgaggagccatgcatgttgtgtatattttctat	mtr-miR160a	TGCCTGGCTCCCTGTATGCCA	5'	Yes	gp1	..((((((((.....((((((.(((((((..((((((((((..((((((.((((((....))))))))))).)..))))))))))..))))))).)))))).)))))))).......	108	38.5	-55.8	1.2	344.667	313	288.333	407.167	324.5	427.833	404.21	293.803	329.099	414.06	330.699	414.268	middle
18	28	mtr-miR160a	TGCCTGGCTCCCTGTATGCCA	21	chr1.4	-	74152129	74152247	catgcatacatatgtgtatgTGCCTGGCTCCCTGTATGCCAtatacgaagctcgttgaaaaatcaacgacctttgtggatgGCGTATGAGGAGCCAAGCATAttccatgtccatacatg	4	mtr-MIR160b,mtr-MIR160e,gma-MIR160a,gma-MIR160b,	mtr-MIR160b	gtatgTGCCTGGCTCCCTGTATGCCAtatatgaagctcattgaaaaatcaatgacctttgtggatggcgtatgaggagccaagcatattcc	mtr-miR160a	TGCCTGGCTCCCTGTATGCCA	5'	Yes	gp1	((((.((..(((((...((((((.(((((((..(((((((((..((((((.(((((((....))))))).))))))..)))))))))..))))))).))))))..)))))..)).))))	119	45.4	-57.2	1.1	344.667	313	288.333	407.167	324.5	427.833	404.21	293.803	329.099	414.06	330.699	414.268	middle
18	29	gma-miR160a-3p	GCGTATGAGGAGCCAAGCATA	21	chr1.4	-	74152129	74152247	catgcatacatatgtgtatgTGCCTGGCTCCCTGTATGCCAtatacgaagctcgttgaaaaatcaacgacctttgtggatgGCGTATGAGGAGCCAAGCATAttccatgtccatacatg	4	mtr-MIR160b,mtr-MIR160e,gma-MIR160a,gma-MIR160b,	gma-MIR160b	atgtgtatgTGCCTGGCTCCCTGTATGCCAtttgcatagttcattgagcatcaatgatctttgtgaatgGCGTATGAGGAGCCAAGCATA	gma-miR160a-3p	GCGTATGAGGAGCCAAGCATA	3'	Yes	gp1	((((.((..(((((...((((((.(((((((..(((((((((..((((((.(((((((....))))))).))))))..)))))))))..))))))).))))))..)))))..)).))))	119	45.4	-57.2	1.1	335	319	462	235	193	165	392.873	299.435	527.319	238.979	196.687	159.768	middle
19	30	mtr-miR160c	TGCCTGGCTCCCTGAATGCCA	21	chr2.1	+	63030973	63031064	tcgctTGCCTGGCTCCCTGAATGCCAtctgagaagcttgtcaaaagaattggcaacctttccatTTGGCATGAAGGGAGCCATGCaggctgc	1	mtr-MIR160c,	mtr-MIR160c	tcgctTGCCTGGCTCCCTGAATGCCAtctgagaagcttgtcaaaacgattggcaacctttccatttggcatgaagggagccatgcaggctgc	mtr-miR160c	TGCCTGGCTCCCTGAATGCCA	5'	Yes	gp1	..((((((.(((((((((..((((((..((..(((.(((((((.....))))))).)))..))..))))))..))))))))).))))))...	87	52.2	-53.5	1.1	135.5	201	100	92.5	132	92	158.908	188.672	114.138	94.0661	134.521	89.0829	middle
19	31	mtr-MIR160c-p3	TTGGCATGAAGGGAGCCATGC	21	chr2.1	+	63030973	63031064	tcgctTGCCTGGCTCCCTGAATGCCAtctgagaagcttgtcaaaagaattggcaacctttccatTTGGCATGAAGGGAGCCATGCaggctgc	1	mtr-MIR160c,	mtr-MIR160c	tcgctTGCCTGGCTCCCTGAATGCCAtctgagaagcttgtcaaaacgattggcaacctttccatttggcatgaagggagccatgcaggctgc	mtr-MIR160c-p3	ttggcatgaagggagccatgc	3'	New	gp1	..((((((.(((((((((..((((((..((..(((.(((((((.....))))))).)))..))..))))))..))))))))).))))))...	87	52.2	-53.5	1.1	0	0	5	0	0	0	0	0	5.70692	0	0	0	low
20	32	mes-miR160e_R-2	TGCCTGGCTCCCTGAATGCCA	21	chr2.2	+	59721085	59721169	TGCCTGGCTCCCTGAATGCCAtctgagaagcttgtcaaaagaattggcaaccttcccatttggcatgaagggagccatgcaggct	4	mes-MIR160f,mes-MIR160e,cpa-MIR160d,rco-MIR160c,	mes-MIR160e	gccTGCCTGGCTCCCTGAATGCCATCtaagaagcttgtcaaagaatgttggcagccttcttacttggcatgaagggagtcaagcaggc	mes-miR160e	TGCCTGGCTCCCTGAATGCCATC	5'	Diff	gp1	(((.(((((((((..((((((..((.((((.(((((((.....))))))).)))).))..))))))..))))))))).)))....	81	51.8	-47.4	1.1	135.5	201	100	92.5	132	92	158.908	188.672	114.138	94.0661	134.521	89.0829	middle
21	33	mtr-miR160a	TGCCTGGCTCCCTGTATGCCA	21	chr7.1	-	8552266	8552352	TGCCTGGCTCCCTGTATGCCAtttgtagagtccatcacgacagtgatgaacttagtgaatggcgtactcggagtcatgcatgctgtg	2	mtr-MIR160d,gma-MIR160d,	mtr-MIR160d	tagtgTGCCTGGCTCCCTGTATGCCAtttgtagagtccatcacgacagtgatgaacttagtgaatggcgtactcggagtcatgcatgctgt	mtr-miR160a	TGCCTGGCTCCCTGTATGCCA	5'	Yes	gp1	(((.(((((((..((((((((((..(..(((.((((((....)))))).)))..)..))))))))))..))))))).))).......	80	50.6	-46.1	1	344.667	313	288.333	407.167	324.5	427.833	404.21	293.803	329.099	414.06	330.699	414.268	middle
22	34	mtr-MIR162-p5	GGATGCAGCGGTTCATCGATC	21	chr8.1	+	14694788	14694911	agataaggcgaagttcgtcactGGATGCAGCGGTTCATCGATCtgttcctgaattttgtttgtctcgcaaaacaaacatgaatcggTCGATAAACCTCTGCATCCAGcgctcacttttccctct	4	mtr-MIR162,gma-MIR162b,aau-MIR162,mdm-MIR162b,	mtr-MIR162	agatgaggtgaagttcgtcactggatgcagcggttcatcgatctgttcctgaattttgtttgtctcgtaaaacaaacatgaatcggTCGATAAACCTCTGCATCCAGcgctcactttcccctct	mtr-MIR162-p5	ggatgcagcggttcatcgatc	5'	New	gp1	.....(((.(((((..((..((((((((((.((((.(((((((..(((.((...(((((((........))))))))).)))..))))))).)))).)))))))))).))..)))))..)))..	117	46	-47	0.8	101	71	112	104	118	105	118.448	66.6454	127.835	105.761	120.254	101.671	middle
22	35	mtr-miR162	TCGATAAACCTCTGCATCCAG	21	chr8.1	+	14694788	14694911	agataaggcgaagttcgtcactGGATGCAGCGGTTCATCGATCtgttcctgaattttgtttgtctcgcaaaacaaacatgaatcggTCGATAAACCTCTGCATCCAGcgctcacttttccctct	4	mtr-MIR162,gma-MIR162b,aau-MIR162,mdm-MIR162b,	mtr-MIR162	agatgaggtgaagttcgtcactggatgcagcggttcatcgatctgttcctgaattttgtttgtctcgtaaaacaaacatgaatcggTCGATAAACCTCTGCATCCAGcgctcactttcccctct	mtr-miR162	TCGATAAACCTCTGCATCCAG	3'	Yes	gp1	.....(((.(((((..((..((((((((((.((((.(((((((..(((.((...(((((((........))))))))).)))..))))))).)))).)))))))))).))..)))))..)))..	117	46	-47	0.8	5087	5143	4282	5052	4497	4448	5965.81	4827.57	4887.41	5137.53	4582.9	4306.97	high
23	36	mtr-miR164a	TGGAGAAGCAGGGCACGTGCA	21	chr7.4	-	32461086	32461229	caagaTGGAGAAGCAGGGCACGTGCAatactaactcatgaacatacacacatgatggaagtgaatacaaagagaatctacattctcttatgtttcatttttttaattgagttagtttttCATGTGCCCCTCTTCCCCATCatga	1	mtr-MIR164b,	mtr-MIR164b	caagaTGGAGAAGCAGGGCACGTGCAatactaactcatgaacatacacacatgatggaagtgaatacaaagagaatctacattctcttatgtttcatttttttaattgagttagttcttcatgtgcccctcttccccatcatga	mtr-miR164a	TGGAGAAGCAGGGCACGTGCA	5'	Yes	gp1	((.(((((.((((..(((((((((.((.(((((((((....(((......)))...((((((((.(((((((((((....)))))))).)))))))))))......))))))))).)).)))))))))..)))).))))).)).	143	37.5	-57.2	1.1	2331.67	3042.67	2248.67	3096.67	2443	3771	2734.48	2856.05	2566.59	3149.1	2489.67	3651.43	high
23	37	mtr-MIR164b-p3	CATGTGCCCCTCTTCCCCATC	21	chr7.4	-	32461086	32461229	caagaTGGAGAAGCAGGGCACGTGCAatactaactcatgaacatacacacatgatggaagtgaatacaaagagaatctacattctcttatgtttcatttttttaattgagttagtttttCATGTGCCCCTCTTCCCCATCatga	1	mtr-MIR164b,	mtr-MIR164b	caagaTGGAGAAGCAGGGCACGTGCAatactaactcatgaacatacacacatgatggaagtgaatacaaagagaatctacattctcttatgtttcatttttttaattgagttagttcttcatgtgcccctcttccccatcatga	mtr-MIR164b-p3	catgtgcccctcttccccatc	3'	New	gp1	((.(((((.((((..(((((((((.((.(((((((((....(((......)))...((((((((.(((((((((((....)))))))).)))))))))))......))))))))).)).)))))))))..)))).))))).)).	143	37.5	-57.2	1.1	245	397	321	456	647	764	287.325	372.651	366.384	463.72	659.359	739.776	high
24	38	mtr-miR164a	TGGAGAAGCAGGGCACGTGCA	21	chr1.4	+	70186536	70186633	cttgtTGGAGAAGCAGGGCACGTGCAaatcctcttatgattcattctctcataatgcatatcaatctcttttgcacgtgctccccttctccaactagg	1	mtr-MIR164a,	mtr-MIR164a	cttgtTGGAGAAGCAGGGCACGTGCAaatcctctttctgattcattctctcataatgcatatcaatatcttttgcacgtgctccccttctccaactagg	mtr-miR164a	TGGAGAAGCAGGGCACGTGCA	5'	Yes	gp1	((.((((((((((..(((((((((((((........((((.((((.......))))...))))......)))))))))))))..)))))))))).)).	97	44.9	-40.8	0.9	2331.67	3042.67	2248.67	3096.67	2443	3771	2734.48	2856.05	2566.59	3149.1	2489.67	3651.43	high
25	39	mtr-miR164a	TGGAGAAGCAGGGCACGTGCA	21	chr7.1	-	3377990	3378075	cttgtTGGAGAAGCAGGGCACGTGCAatcgtagatctctctcaaacttcaatctcattttgCACGTGCTCCACTTTTCCAACttga	1	mtr-MIR164c,	mtr-MIR164c	cttgtTGGAGAAGCAGGGCACGTGCAaccgtagatctctctcaaacttcaatctcattttgcacgtgctccacttttccaacttga	mtr-miR164a	TGGAGAAGCAGGGCACGTGCA	5'	Yes	gp1	...((((((((((..((((((((((((....((((...............))))....))))))))))))..))))))))))....	79	45.3	-36.3	0.9	2331.67	3042.67	2248.67	3096.67	2443	3771	2734.48	2856.05	2566.59	3149.1	2489.67	3651.43	high
25	40	mtr-MIR164c-p3	CACGTGCTCCACTTTTCCAAC	21	chr7.1	-	3377990	3378075	cttgtTGGAGAAGCAGGGCACGTGCAatcgtagatctctctcaaacttcaatctcattttgCACGTGCTCCACTTTTCCAACttga	1	mtr-MIR164c,	mtr-MIR164c	cttgtTGGAGAAGCAGGGCACGTGCAaccgtagatctctctcaaacttcaatctcattttgcacgtgctccacttttccaacttga	mtr-MIR164c-p3	cacgtgctccacttttccaac	3'	New	gp1	...((((((((((..((((((((((((....((((...............))))....))))))))))))..))))))))))....	79	45.3	-36.3	0.9	0	0	0	0	0	0	0	0	0	0	0	0	low
26	41	mtr-miR166c_L+2R-2	TCTCGGACCAGGCTTCATTCC	21	chr3.1	-	77433838	77433938	agaggaacgctgtctggctcgaggaatgctcagatctattctgatctgatcgatatgttcatatctaattgatTCTCGGACCAGGCTTCATTCCtcccatc	1	mtr-MIR166c,	mtr-MIR166c	gctgagaggaacgcagtctggctcgaggaatgctcagatctgttttgatctgatcgatatgttcatatctaattaattcTCGGACCAGGCTTCATTCCTCccatc	mtr-miR166c	TCGGACCAGGCTTCATTCCTC	3'	Diff	gp1	.((((((....((((((..((((((....(((((((......)))))))..(((((....))))).......))))))..))))))....)))))).....	95	45.5	-40.5	0.9	1918.7	2293.8	2254.2	2483.05	2304.53	3047.97	2250.17	2153.11	2572.91	2525.09	2348.55	2951.32	high
27	42	mtr-miR166a	TCGGACCAGGCTTCATTCCCC	21	chr1.4	-	61682567	61682689	cagacatacagaggagttgaggggaatgctgtctgattcgagaccattcgtcacaagtgaaccatagccttgagagaatgatcTCGGACCAGGCTTCATTCCCCctagctcttagtatcatgc	1	mtr-MIR166a,	mtr-MIR166a	cagacatacgaaggagttcaggggaatggtgtctgattcgagaccattcgtcacaagtaaacagtagccttgagaatgatcTCGGACCAGGCTTCATTCCCCctagctcatagtatcatgc	mtr-miR166a	TCGGACCAGGCTTCATTCCCC	3'	Yes	gp1	.....((((..(((((((..((((((((..(((((.(((((((.(((((.((.((((...........)))).))))))).))))))).)))))..))))))))..))))))).)))).....	113	48.8	-52.7	0.9	94452.2	97359.7	106735	108775	116631	117169	110769	91388.4	121825	110617	118858	113453	high
28	43	mtr-MIR166d-p5_1ss18AG	GGAATGTTGCCTGGCTCGAGG	21	chr3.1	-	77434013	77434103	gttgaggGGAATGTTGCCTGGTTCAAGGcttttcatagtttgatctatctactatgatgaaggctTCGGACCAGGCTTCATTCCCCtcaaa	1	mtr-MIR166d,	mtr-MIR166d	gttgaggggaatgttgcctggctcaaggcttttcatagtttgatctatctactatgattaaggctTCGGGCCAGGCTTCATCCCCCtcaaa	mtr-MIR166d-p5	ggaatgttgcctggctcaagg	5'	New	gp1	.((((((((((((..(((((((((.((((((((((((((..((....)).)))))))..))))))).)))))))))..)))))))))))).	89	45.1	-53.9	1.3	0	2.33333	0	0	1.66667	1.66667	0	2.19022	0	0	1.6985	1.61382	low
28	44	mtr-miR166d_1ss17CT	TCGGGCCAGGCTTCATTCCCC	21	chr3.1	-	77434013	77434103	gttgaggGGAATGTTGCCTGGTTCAAGGcttttcatagtttgatctatctactatgatgaaggctTCGGACCAGGCTTCATTCCCCtcaaa	1	mtr-MIR166d,	mtr-MIR166d	gttgaggggaatgttgcctggctcaaggcttttcatagtttgatctatctactatgattaaggctTCGGGCCAGGCTTCATCCCCCtcaaa	mtr-miR166d	TCGGGCCAGGCTTCATCCCCC	3'	Diff	gp1	.((((((((((((..(((((((((.((((((((((((((..((....)).)))))))..))))))).)))))))))..)))))))))))).	89	45.1	-53.9	1.3	12	11.75	11.75	16	17.75	16.25	14.0731	11.0293	13.4113	16.2709	18.0891	15.7348	middle
29	45	mtr-MIR166b-p5	GGAATGTTGTTTGGCTCGAGG	21	chr2.1	+	75286085	75286255	gttgatgGGAATGTTGTTTGGCTCGAGGtaataactaactcaatttctaatttgtttttgaagcttttctttgtttcactcttttgattccttgaaagttgaaactaagtgagcttcaaaggtttgattttgttgtgtgattaTCTCGGACCAGGCTTCATTCCtaccaac	1	mtr-MIR166b,	mtr-MIR166b	gttgatgggaatgttgtttggctcgaggtaataactaactcaatttctttgtctttgaaagcttttctttgtttcactctttttgattcttagaaagttgaaactaagtgagctttaaaggtttgattttgatgtgtgattatcTCGGACCAGGCTTCATTCCTAccaac	mtr-MIR166b-p5	ggaatgttgtttggctcgagg	5'	New	gp1	((((.((((((((..(..(((..(((((((((.((.....(((..((......(..((((((((((..(((.((((((..((((..(....)..)))).)))))).))).))))))))))..)..))..)))....)).)))))))))..)))..)..)))))))).))))	171	35.7	-64.1	1.1	294	323	493	292	396	330	344.79	303.189	562.702	296.944	403.564	319.537	middle
29	46	mtr-miR166b_L+2R-2	TCTCGGACCAGGCTTCATTCC	21	chr2.1	+	75286085	75286255	gttgatgGGAATGTTGTTTGGCTCGAGGtaataactaactcaatttctaatttgtttttgaagcttttctttgtttcactcttttgattccttgaaagttgaaactaagtgagcttcaaaggtttgattttgttgtgtgattaTCTCGGACCAGGCTTCATTCCtaccaac	1	mtr-MIR166b,	mtr-MIR166b	gttgatgggaatgttgtttggctcgaggtaataactaactcaatttctttgtctttgaaagcttttctttgtttcactctttttgattcttagaaagttgaaactaagtgagctttaaaggtttgattttgatgtgtgattatcTCGGACCAGGCTTCATTCCTAccaac	mtr-miR166b	TCGGACCAGGCTTCATTCCTA	3'	Diff	gp1	((((.((((((((..(..(((..(((((((((.((.....(((..((......(..((((((((((..(((.((((((..((((..(....)..)))).)))))).))).))))))))))..)..))..)))....)).)))))))))..)))..)..)))))))).))))	171	35.7	-64.1	1.1	1918.7	2293.8	2254.2	2483.05	2304.53	3047.97	2250.17	2153.11	2572.91	2525.09	2348.55	2951.32	high
30	47	mtr-miR166e-5p	GGAATGTTGGCTGGCTCGAGG	21	chr4.1	+	7756213	7756318	tttgaggGGAATGTTGGCTGGCTCGAGGcttttcagtttcacaaaggaagttcagtcttaattgtatgaactataaggctTCGGACCAGGCTTCATTCCCCtcaaa	1	mtr-MIR166e,	mtr-MIR166e	tttgaggGGAATGTTGGCTGGCTCGAGGcttttcagtttcacaaaggaagttcagtcttaattgtatgaactataaggctTCGGACCAGGCTTCATTCCCCtcaaa	mtr-miR166e-5p	GGAATGTTGGCTGGCTCGAGG	5'	Yes	gp1	(((((((((((((..((((((..(((((((((..(((((.((((...(((......)))..))))..)))))..)))))))))..))).))).)))))))))))))	106	44.3	-50.1	1.1	760	1012.33	816.5	1224.5	1071.17	1804.67	891.295	950.244	931.94	1245.23	1091.63	1747.45	high
30	48	mtr-miR166a	TCGGACCAGGCTTCATTCCCC	21	chr4.1	+	7756213	7756318	tttgaggGGAATGTTGGCTGGCTCGAGGcttttcagtttcacaaaggaagttcagtcttaattgtatgaactataaggctTCGGACCAGGCTTCATTCCCCtcaaa	1	mtr-MIR166e,	mtr-MIR166e	tttgaggGGAATGTTGGCTGGCTCGAGGcttttcagtttcacaaaggaagttcagtcttaattgtatgaactataaggctTCGGACCAGGCTTCATTCCCCtcaaa	mtr-miR166a	TCGGACCAGGCTTCATTCCCC	3'	Yes	gp1	(((((((((((((..((((((..(((((((((..(((((.((((...(((......)))..))))..)))))..)))))))))..))).))).)))))))))))))	106	44.3	-50.1	1.1	94452.2	97359.7	106735	108775	116631	117169	110769	91388.4	121825	110617	118858	113453	high
31	49	mtr-miR166g-5p	GGAATGTTGTCTGGCTCGAGG	21	chr8.2	+	71186302	71186408	tttgaggGGAATGTTGTCTGGCTCGAGGacgctttcttctcgatctaattcaaatttgtggtcatggattgtaaagtattcTCGGACCAGGCTTCATTCCCCccaat	1	mtr-MIR166g,	mtr-MIR166g	tttgaggGGAATGTTGTCTGGCTCGAGGacgctttcttctcgatctaatgcaaatttgtggtcatggattgtaaagtattcTCGGACCAGGCTTCATTCCCCccaat	mtr-miR166g-5p	GGAATGTTGTCTGGCTCGAGG	5'	Yes	gp1	.(((.((((((((..((((((..((((((..((((.....(((((((..(((......)))...))))))).))))..))))))..))))))..)))))))).))).	105	44.9	-46.8	1	21956	18299.3	23539.5	23095.5	35473.2	32522.7	25749	17177	26867.6	23486.5	36150.8	31491.5	high
31	50	mtr-miR166a	TCGGACCAGGCTTCATTCCCC	21	chr8.2	+	71186302	71186408	tttgaggGGAATGTTGTCTGGCTCGAGGacgctttcttctcgatctaattcaaatttgtggtcatggattgtaaagtattcTCGGACCAGGCTTCATTCCCCccaat	1	mtr-MIR166g,	mtr-MIR166g	tttgaggGGAATGTTGTCTGGCTCGAGGacgctttcttctcgatctaatgcaaatttgtggtcatggattgtaaagtattcTCGGACCAGGCTTCATTCCCCccaat	mtr-miR166a	TCGGACCAGGCTTCATTCCCC	3'	Yes	gp1	.(((.((((((((..((((((..((((((..((((.....(((((((..(((......)))...))))))).))))..))))))..))))))..)))))))).))).	105	44.9	-46.8	1	94452.2	97359.7	106735	108775	116631	117169	110769	91388.4	121825	110617	118858	113453	high
32	51	mtr-miR167b-5p	TGAAGCTGCCAGCATGATCTG	21	chr7.2	-	2434187	2434382	caatgacagtTGAAGCTGCCAGCATGATCTGtgctttccttcttgtgtatatactttccatctgaacttaaatataaccaaaaataaatgtgtttggtctaaattttgatcaaacttatatatatttttgcttatgtttaagtctcggttgagtatgtggtaagaacAGATCATGTTGGAGCTTCACCtgttaaat	1	mtr-MIR167b,	mtr-MIR167b	caatgacagtTGAAGCTGCCAGCATGATCTGtgctttccttcctgtgtatatactttaatttccagctgaatttaaatataaccaaaaaaataaatatgtttggtctaaattttgatcaaacttatatatatttttgcttatgtttaagtctggggtgagtttatttgtggtaagaacaGATCATGTTGGAGCTTCACCtgttaaat	mtr-miR167b-5p	TGAAGCTGCCAGCATGATCTG	5'	Yes	gp1	...((((((.(((((((.((((((((((((((.(((.((.........((((((((.....((((((((((((((((.((((((((.((((((((((((........))))))))..)))).)))))))).)))))))))))).))))..)))))))))).))).))))))))))))))))))))).))))))...	190	32.7	-82.1	1.3	12690.2	13326.8	10622.7	11727.3	13646.2	9477.17	14882.5	12509.5	12124.5	11925.9	13906.8	9176.67	high
32	52	mtr-miR167b-3p_L+1	AGATCATGTTGGAGCTTCACC	21	chr7.2	-	2434187	2434382	caatgacagtTGAAGCTGCCAGCATGATCTGtgctttccttcttgtgtatatactttccatctgaacttaaatataaccaaaaataaatgtgtttggtctaaattttgatcaaacttatatatatttttgcttatgtttaagtctcggttgagtatgtggtaagaacAGATCATGTTGGAGCTTCACCtgttaaat	1	mtr-MIR167b,	mtr-MIR167b	caatgacagtTGAAGCTGCCAGCATGATCTGtgctttccttcctgtgtatatactttaatttccagctgaatttaaatataaccaaaaaaataaatatgtttggtctaaattttgatcaaacttatatatatttttgcttatgtttaagtctggggtgagtttatttgtggtaagaacaGATCATGTTGGAGCTTCACCtgttaaat	mtr-miR167b-3p	GATCATGTTGGAGCTTCACC	3'	Diff	gp1	...((((((.(((((((.((((((((((((((.(((.((.........((((((((.....((((((((((((((((.((((((((.((((((((((((........))))))))..)))).)))))))).)))))))))))).))))..)))))))))).))).))))))))))))))))))))).))))))...	190	32.7	-82.1	1.3	39	16	42	38	0	55	45.7375	15.0187	47.9381	38.6434	0	53.2561	middle
33	53	gma-miR167c	TGAAGCTGCCAGCATGATCTG	21	chr1.1	-	60247902	60247999	gtgcaccttcagcagtTGAAGCTGCCAGCATGATCTGagcttaccttctaatggcaagaataGATCATATGGCAGCTTCACCtcttgactggaagcat	4	gma-MIR167g,gma-MIR167j,lja-MIR167,gso-MIR167a,	gma-MIR167g	cagcagtTGAAGCTGCCAGCATGATCTGagtttaccttctattggtaagaacagatcatgtggctgcttcacctgttg	gma-miR167c	TGAAGCTGCCAGCATGATCTG	5'	Yes	gp1	((((.((.(((..((.(((((((((((..((((((((..(((.((.......)).)))..)))))))).))))))))))).))..)))..))..))))	98	46.9	-43.1	0.9	12690.2	13326.8	10622.7	11727.3	13646.2	9477.17	14882.5	12509.5	12124.5	11925.9	13906.8	9176.67	high
33	54	lja-MIR167-p3	GATCATATGGCAGCTTCACC	20	chr1.1	-	60247902	60247999	gtgcaccttcagcagtTGAAGCTGCCAGCATGATCTGagcttaccttctaatggcaagaataGATCATATGGCAGCTTCACCtcttgactggaagcat	4	gma-MIR167g,gma-MIR167j,lja-MIR167,gso-MIR167a,	lja-MIR167	gttcgtgcacctgcaatagtTGAAGCTGCCAGCATGATCTGagcttaccttcttgtaataatggtaagaacagatcatatggcagcttcacctgttgaatggaagcat	lja-MIR167-p3	gatcatatggcagcttcacc	3'	New	gp1	((((.((.(((..((.(((((((((((..((((((((..(((.((.......)).)))..)))))))).))))))))))).))..)))..))..))))	98	46.9	-43.1	0.9	952	729	709	793	1616	803	1116.46	684.288	809.241	806.426	1646.87	777.539	high
34	55	lja-miR167a_R+1	TGAAGCTGCCAGCATGATCTT	21	chr4.1	-	33669869	33669974	tcatgcaccataccaagtTGAAGCTGCCAGCATGATCTTaactgacctcctttgtaggtgaaagatcagatcatggtggcagtttcacctagttgttggctgcatg	1	lja-MIR167b,	lja-MIR167b	tcatgcaccactaccagtTGAAGCTGCCAGCATGATCTtaacttccctccatggtggggaaagatcagatcatgtggcagtttcaccttgttgttggttgcatga	lja-miR167a	TGAAGCTGCCAGCATGATCT	5'	Diff	gp1	.(((((((((.....((.(((((((((((.((((((((...((.....(((....)))....))...)))))))).))))))))))).))......))).))))))	105	46.2	-45.9	0.9	9543.17	11574.8	7887.67	9193.83	9971.67	8046.17	11191.8	10864.9	9002.86	9349.49	10162.1	7791.04	high
35	56	mtr-miR168b	TCGCTTGGTGCAGGTCGGGAA	21	chr5.1	+	16257290	16257414	ctcacttcgcggtctctaatTCGCTTGGTGCAGGTCGGGAAccactacaatcgcagttttcgtagaaactacggttacgaattggatCCCGCCTTGCATCAACTGAATcggaggccgcggtgaat	1	mtr-MIR168c,	mtr-MIR168c	ctcacttcgcggtctctaatTCGCTTGGTGCAGGTCGGGAAccactacatccgctgttttcgtagaaaccggcggtgaattggatCCCGCCTTGCATCAACTGAATcggaggccgcggtgaatcta	mtr-miR168b	TCGCTTGGTGCAGGTCGGGAA	5'	Yes	gp1	.((((..(((((((((..((((..((((((((((.(((((.(((....(((((.((((((....)))))).)))))......))).))))).))))))))))..))))..)))))))))))))..	122	52	-62.1	1	4978	4860.5	5419	5830	3696	4605.5	5837.98	4562.39	6185.16	5928.71	3766.6	4459.47	high
35	57	mtr-miR168c-3p	CCCGCCTTGCATCAACTGAAT	21	chr5.1	+	16257290	16257414	ctcacttcgcggtctctaatTCGCTTGGTGCAGGTCGGGAAccactacaatcgcagttttcgtagaaactacggttacgaattggatCCCGCCTTGCATCAACTGAATcggaggccgcggtgaat	1	mtr-MIR168c,	mtr-MIR168c	ctcacttcgcggtctctaatTCGCTTGGTGCAGGTCGGGAAccactacatccgctgttttcgtagaaaccggcggtgaattggatCCCGCCTTGCATCAACTGAATcggaggccgcggtgaatcta	mtr-miR168c-3p	CCCGCCTTGCATCAACTGAAT	3'	Yes	gp1	.((((..(((((((((..((((..((((((((((.(((((.(((....(((((.((((((....)))))).)))))......))).))))).))))))))))..))))..)))))))))))))..	122	52	-62.1	1	5354	4394	5986	3537	2867	3325	6278.94	4124.5	6832.33	3596.88	2921.77	3219.57	high
36	58	mtr-miR168b	TCGCTTGGTGCAGGTCGGGAA	21	chr5.1	+	78668965	78669055	ctctgatTCGCTTGGTGCAGGTCGGGAAccattacatccacagtttcccttggtaaattggatcccgccttgcatcaaccgaatcggaggc	1	mtr-MIR168b,	mtr-MIR168b	aacctctgatTCGCTTGGTGCAGGTCGGGAAccattacatccacagtttccctcggtaaattggatcctgccttgcatcaatcgaatcggaggctgca	mtr-miR168b	TCGCTTGGTGCAGGTCGGGAA	5'	Yes	gp1	((((((((((.((((((((((.(((((.(((......(((.((.....))))).....))).))))).)))))))))).))))))))))..	89	52.7	-46.5	1	4978	4860.5	5419	5830	3696	4605.5	5837.98	4562.39	6185.16	5928.71	3766.6	4459.47	high
37	59	mtr-MIR169a-p3	AGTTGTCCTTGGCTATGTTAGTCT	24	chr6.1	-	62505136	62505256	aagaggcagagagagtaatgcagccaaggatgacttgccggcaatattggcgagggttcatgtgatttctgtctcgttgtgccggcaAGTTGTCCTTGGCTATGTTAGTCTctcatcttct	1	mtr-MIR169a,	mtr-MIR169a	aagaggcagagagagtaatgCAGCCAAGGATGACTTGCCGAcaacattggcgaatgttcatgtgatttctgcctcattgtgccggcaagttgtccttggctatgttagtctctcatcttct	mtr-MIR169a-p3	agttgtccttggctatgttagtct	3'	New	gp1	.(((((..((((((.((((..(((((((((..(((((((((((.....(((.(((..((....))..))))))......)))))))))))..)))))))))..)))).))))))..)))))	120	48.8	-67.2	1.1	11	45	18	28	25	47	12.9003	42.24	20.5449	28.4741	25.4776	45.5098	middle
38	60	mtr-miR169j	TGAGCCAGGATGACTTGCCGG	21	chr2.1	-	53398768	53398900	agaggcagagagagtatattTGAGCCAGGATGACTTGCCGGcatttgctgtaaatgtagaagaagaatcccttctcacaattaaagtgttgttGGCGAGGAATCTAGGCTCATAtttgctctctttccactca	1	mtr-MIR169j,	mtr-MIR169j	agaggtagagagagtatattTGAGCCAGGATGACTTGCCGGcatttgctgtaaatgtagaagaatcccttctcacaattaaggtgttgttggcgaggaatctaggctcatatttgctctctttccactca	mtr-miR169j	TGAGCCAGGATGACTTGCCGG	5'	Yes	gp1	.(((..((((((((((.((.((((((..(((..((((((..((...(((.(((.((((((((........))))).))).))).)))..))..))))))..)))..)))))).)).))))))))))...))).	131	42.9	-59.2	1	0	0	9	0	0	0	0	0	10.2725	0	0	0	middle
38	61	mtr-MIR169j-p3	GGCGAGGAATCTAGGCTCATA	21	chr2.1	-	53398768	53398900	agaggcagagagagtatattTGAGCCAGGATGACTTGCCGGcatttgctgtaaatgtagaagaagaatcccttctcacaattaaagtgttgttGGCGAGGAATCTAGGCTCATAtttgctctctttccactca	1	mtr-MIR169j,	mtr-MIR169j	agaggtagagagagtatattTGAGCCAGGATGACTTGCCGGcatttgctgtaaatgtagaagaatcccttctcacaattaaggtgttgttggcgaggaatctaggctcatatttgctctctttccactca	mtr-MIR169j-p3	ggcgaggaatctaggctcata	3'	New	gp1	.(((..((((((((((.((.((((((..(((..((((((..((...(((.(((.((((((((........))))).))).))).)))..))..))))))..)))..)))))).)).))))))))))...))).	131	42.9	-59.2	1	0	15	15	0	0	0	0	14.08	17.1208	0	0	0	middle
39	62	mtr-miR169b	CAGCCAAGGATGACTTGCCGG	21	chr6.3	+	7212125	7212333	atatgCAGCCAAGGATGACTTGCCGGcgagcctctttcgatacttttatgacataattaatcatgtggatagccaaggcactaaactcagtttgcactaaatattattttttcttactttagtgcaatcttagtttaggcgccttgcaacggctagccaaatgccgtagtttcagtgtgattagttgtccggcaagtcgtctctggcta	1	mtr-MIR169g,	mtr-MIR169g	atatgCAGCCAAGGATGACTTGCCGGcgagcctctttcgatacttttatgacataattaatcatgtggatagccaaggtactaaactcactttgcactaaaacaaatatttttgctttagtgcaaacttagtttaggcgcttcgcaacggctagtcaaatgtcctagttccaatgtgattggttgtccggcaagtcgtctctggctacgta	mtr-miR169b	CAGCCAAGGATGACTTGCCGG	5'	Yes	gp1	......(((((..(((((((((((((((((.....)))).............(((((((((((..((((..((.(((((.(((((((.((.((((((((((................)))))))))).)).)))))))..))))))).(((((.........)))))...))).)..))))))))))))))))))))))))..))))).	202	42.1	-84.6	1	0	3.5	0	3	3	4	0	3.28534	0	3.05079	3.05731	3.87317	low
40	63	mtr-miR169k_1ss15TC	TGAGCCAGGATGGCCTGCCGG	21	chr8.1	-	5296953	5297052	gaaggtagagagagtagattTGAGCCAGGATGGCTTGCCGAcaagcattttagggtgttgctAGCGGGCCATCTTGTCTCACAtttgctcactttcctct	1	mtr-MIR169k,	mtr-MIR169k	gaaggtagagagagtggattTGAGCCAGGATGGCTTGCCGGcatgcattttagggtgttgctagcgggccatcttgtctcacatttgctatctttcctct	mtr-miR169k	TGAGCCAGGATGGCTTGCCGG	5'	Diff	gp1	..(((.((((.((((((((.((((.(((((((((..((.....(((((......)))))....))..))))))))).)))).)))))))).)))))))..	96	49	-45.7	0.9	0	5	0	0	0	6	0	4.69334	0	0	0	5.80976	low
40	64	mtr-MIR169k-p3	AGCGGGCCATCTTGTCTCACA	21	chr8.1	-	5296953	5297052	gaaggtagagagagtagattTGAGCCAGGATGGCTTGCCGAcaagcattttagggtgttgctAGCGGGCCATCTTGTCTCACAtttgctcactttcctct	1	mtr-MIR169k,	mtr-MIR169k	gaaggtagagagagtggattTGAGCCAGGATGGCTTGCCGGcatgcattttagggtgttgctagcgggccatcttgtctcacatttgctatctttcctct	mtr-MIR169k-p3	agcgggccatcttgtctcaca	3'	New	gp1	..(((.((((.((((((((.((((.(((((((((..((.....(((((......)))))....))..))))))))).)))).)))))))).)))))))..	96	49	-45.7	0.9	0	25	13	0	6	6	0	23.4667	14.838	0	6.11461	5.80976	middle
41	65	mtr-miR169h	TGAGCCAAAGATGACTTGCCGG	22	chr8.1	+	5298973	5299058	gattTGAGCCAAAGATGACTTGCCGGcatgctgcctgaaaagcaagaagggtgttgttttgctGGCAGTTGTCATTGGTTCATGtt	2	mtr-MIR169h,mtr-MIR169i,	mtr-MIR169h	gattTGAGCCAAAGATGACTTGCCGGcatgctgcctgaaaagcaagaagggtgttgttttgctggcagttgtcattggttcatgtt	mtr-miR169h	TGAGCCAAAGATGACTTGCCGG	5'	Yes	gp1	....((((((((.((..((.((((((((.((.((((............))))...))..))))))))))..)).))))))))....	78	46.5	-34.7	0.9	122	87	139	20	30	35	143.076	81.664	158.652	20.3386	30.5731	33.8902	middle
41	66	mtr-MIR169h-p3	GGCAGTTGTCATTGGTTCATG	21	chr8.1	+	5298973	5299058	gattTGAGCCAAAGATGACTTGCCGGcatgctgcctgaaaagcaagaagggtgttgttttgctGGCAGTTGTCATTGGTTCATGtt	2	mtr-MIR169h,mtr-MIR169i,	mtr-MIR169h	gattTGAGCCAAAGATGACTTGCCGGcatgctgcctgaaaagcaagaagggtgttgttttgctggcagttgtcattggttcatgtt	mtr-MIR169h-p3	ggcagttgtcattggttcatg	3'	New	gp1	....((((((((.((..((.((((((((.((.((((............))))...))..))))))))))..)).))))))))....	78	46.5	-34.7	0.9	46	40	51	10	8	6	53.9468	37.5467	58.2106	10.1693	8.15282	5.80976	middle
42	67	mtr-MIR169l-p5	AGAGTGTAGTACAGCCAAGGA	21	chr1.1	+	57868430	57868558	gcagAGAGTGTAGTACAGCCAAGGAtgacttgccggccggcattagtgaaggcaaaggtaaatgatgactcatgttcatgcatcttctacggccggcaagtttttcCTTGGCTATACTGGACTTTCTtc	1	mtr-MIR169l,	mtr-MIR169l	gcagagagtgtagtaCAGCCAAGGATGACTTGCCGGccggcgttagtgaaggcaaaggcaaatgatcattcatgttcatgcatgcatattctccggccGGCAAGTTTTTCCTTGGCTATAttggactttcttc	mtr-MIR169l-p5	agagtgtagtaCAGCCAAGGA	5'	New	gp1	..(((((((..((((.(((((((((.(((((((((((((........(((((((..((...((((....))))..)).)))..))))..)))))))))))))..))))))))).))))..)))))))..	125	48.1	-61.2	1	7	14.5	18	17	27	13	8.2093	13.6107	20.5449	17.2878	27.5158	12.5878	middle
42	68	mtr-MIR169l-p3_1ss11TC	CTTGGCTATACTGGACTTTCT	21	chr1.1	+	57868430	57868558	gcagAGAGTGTAGTACAGCCAAGGAtgacttgccggccggcattagtgaaggcaaaggtaaatgatgactcatgttcatgcatcttctacggccggcaagtttttcCTTGGCTATACTGGACTTTCTtc	1	mtr-MIR169l,	mtr-MIR169l	gcagagagtgtagtaCAGCCAAGGATGACTTGCCGGccggcgttagtgaaggcaaaggcaaatgatcattcatgttcatgcatgcatattctccggccGGCAAGTTTTTCCTTGGCTATAttggactttcttc	mtr-MIR169l-p3	CTTGGCTATAttggactttct	3'	New	gp1	..(((((((..((((.(((((((((.(((((((((((((........(((((((..((...((((....))))..)).)))..))))..)))))))))))))..))))))))).))))..)))))))..	125	48.1	-61.2	1	5	18	7	7	27	7	5.86378	16.896	7.98969	7.11852	27.5158	6.77805	middle
43	69	mtr-miR169f_R+2	AAGCCAAGGATGACTTGCCTAGC	23	chr3.3	+	81240455	81240580	tatAAGCCAAGGATGACTTGCCTAGCtaaaaacaatttacatgggacttaatttgtatatgttctctgtctgatgagtatgtcccttgtttagtttactagcaggcaggtatcctaggctttttga	1	mtr-MIR169f,	mtr-MIR169f	tttatAAGCCAAGGATGACTTGCCTAgctaaaaaccatttacattaattggggacttaatttgtatatgttatgtctgatcgatgatgagtatgtcccttgtttagtttattagcaggcaggtatcctaggctttttga	mtr-miR169f	AAGCCAAGGATGACTTGCCTA	5'	Diff	gp1	...(((((.(((((.((((((((.((((.((((.....(((.(((((................(((........)))...))))).)))...))))..))))))))))))))))).))))).....	118	37.3	-43.4	0.9	0	0	10	0	0	0	0	0	11.4138	0	0	0	middle
44	70	rco-MIR171a-p5	GGATATTGGTCCGGTTCAATA	21	chr4.1	+	48826588	48826673	aaacgGGATATTGGTCCGGTTCAATAagaaagtaaggcacaaaatgtggtgcctttcttttTGATTGAGCCGTGCCAATATCacgt	1	rco-MIR171a,	rco-MIR171a	aaacgggatattggtccggttcaataagaaaacagtgctcaaaatgttatgggccctgctttttgaTTGAGCCGTGCCAATATCACGtgcac	rco-MIR171a-p5	ggatattggtccggttcaata	5'	New	gp1	..(((.((((((((..(((((((((.((((((.(((((((........))))))).)))))).)))))))))..)))))))).)))	84	41.9	-46.2	1.3	0	0	0	0	0	5	0	0	0	0	0	4.84146	low
44	71	rco-MIR171a-p3	TGATTGAGCCGTGCCAATATC	21	chr4.1	+	48826588	48826673	aaacgGGATATTGGTCCGGTTCAATAagaaagtaaggcacaaaatgtggtgcctttcttttTGATTGAGCCGTGCCAATATCacgt	1	rco-MIR171a,	rco-MIR171a	aaacgggatattggtccggttcaataagaaaacagtgctcaaaatgttatgggccctgctttttgaTTGAGCCGTGCCAATATCACGtgcac	rco-MIR171a-p3	tgaTTGAGCCGTGCCAATATC	3'	New	gp1	..(((.((((((((..(((((((((.((((((.(((((((........))))))).)))))).)))))))))..)))))))).)))	84	41.9	-46.2	1.3	44.981	55.6333	41.2452	58.2333	41.2762	55.3857	52.7517	52.2212	47.0767	59.2193	42.0647	53.6296	middle
45	72	mtr-miR171e-5p	CGATGTTGGTGAGGTTCAATC	21	chr8.2	-	13402542	13402636	aaagCGATGTTGGTGAGGTTCAATCcgaagacggatttacatgtatagaagatgtaaaatacgatctcagaTTGAGCCGCGCCAATATCACTttt	9	mtr-MIR171e,gma-MIR171k,gma-MIR171l,lja-MIR171d,ptc-MIR171c,ptc-MIR171d,mes-MIR171f,mes-MIR171e,ssl-MIR171b,	mtr-MIR171e	aaagCGATGTTGGTGAGGTTCAATCcgaagacggatttacatgtatagagttgtaaaatacgatctcAGATTGAGCCGCGCCAATATCacttt	mtr-miR171e-5p	CGATGTTGGTGAGGTTCAATC	5'	Yes	gp1	((((.((((((((((.(((((((((.((.((((..(((((((.........)))))))...)).)))).))))))))).)))))))))).)))).	94	40	-39.8	1	55	66	53	76	60	77	64.5016	61.952	60.4934	77.2867	61.1461	74.5585	middle
45	73	gma-miR171k-3p	TTGAGCCGCGCCAATATCACT	21	chr8.2	-	13402542	13402636	aaagCGATGTTGGTGAGGTTCAATCcgaagacggatttacatgtatagaagatgtaaaatacgatctcagaTTGAGCCGCGCCAATATCACTttt	9	mtr-MIR171e,gma-MIR171k,gma-MIR171l,lja-MIR171d,ptc-MIR171c,ptc-MIR171d,mes-MIR171f,mes-MIR171e,ssl-MIR171b,	gma-MIR171k	gagaaagCGATGTTGGTGAGGTTCAATCcgaagacggatttacatgtagaagcagtaaaatacgatctcagaTTGAGCCGCGCCAATATCACTttatc	gma-miR171k-3p	TTGAGCCGCGCCAATATCACT	3'	Yes	gp1	((((.((((((((((.(((((((((.((.((((..(((((((.........)))))))...)).)))).))))))))).)))))))))).)))).	94	40	-39.8	1	413.4	463.4	349.8	481.8	268	684.2	484.818	434.978	399.256	489.957	273.119	662.506	middle
46	74	mtr-MIR171h-p5	GTGGTGTTGTTTCTGCTCATC	21	chr3.1	-	73879755	73879859	aagtagacaggaGTGGTGTTGTTTCTGCTCATCttattaaataatgaatgaatgacatttgcttaattataagaCGAGCCGAATCAATATCACTCcagtacacct	1	mtr-MIR171h,	mtr-MIR171h	aagtagacaggagtggtgttgtttctgctcatcttattaaataatgaatgaatgaatgacatttgcttacttataagaCGAGCCGAATCAATATCACTCcagtacacct	mtr-MIR171h-p5	gtggtgttgtttctgctcatc	5'	New	gp1	..((..((.((((((((((((.(((.((((.((((((........(((((.....)))))........)))))).)))).))).)))))))))))).))..))..	101	35.2	-36.7	1	7	13	46	14	5	0	8.2093	12.2027	52.5037	14.237	5.09551	0	middle
46	75	mtr-miR171g_1ss17CT	CGAGCCGAATCAATATTACTC	21	chr3.1	-	73879755	73879859	aagtagacaggaGTGGTGTTGTTTCTGCTCATCttattaaataatgaatgaatgacatttgcttaattataagaCGAGCCGAATCAATATCACTCcagtacacct	1	mtr-MIR171h,	mtr-MIR171h	aagtagacaggagtggtgttgtttctgctcatcttattaaataatgaatgaatgaatgacatttgcttacttataagaCGAGCCGAATCAATATCACTCcagtacacct	mtr-miR171g	CGAGCCGAATCAATATCACTC	3'	Diff	gp1	..((..((.((((((((((((.(((.((((.((((((........(((((.....)))))........)))))).)))).))).)))))))))))).))..))..	101	35.2	-36.7	1	52	59.5	84	69	42.5	73	60.9833	55.8507	95.8763	70.1682	43.3118	70.6854	middle
47	76	mtr-MIR171d-p5	TATTGGCCTGGTTCACTCAGA	21	chr8.1	+	32118826	32118927	aatgagaTATTGGCCTGGTTCACTCAGAccatatgataaaccaccaagatatattgtacttgtgtggttttgggttTGATTGAGCCGTGCCAATATCtcact	1	mtr-MIR171d,	mtr-MIR171d	aatgagatattggcctggttcactcagaccaagtgataaaccactaagatacagtattgtacttgtgtggttttgggttTGATTGAGCCGTGCCAATATCtcact	mtr-MIR171d-p5	tattggcctggttcactcaga	5'	New	gp1	..((((((((((((..((((((.(((((((.......(((((((((((((.....)).)))).)))))))..))))))).))))))..))))))))))))..	98	40.2	-49.6	1.2	26	18	11	36	21	26	30.4917	16.896	12.5552	36.6095	21.4011	25.1756	middle
47	77	mtr-miR171d	TGATTGAGCCGTGCCAATATC	21	chr8.1	+	32118826	32118927	aatgagaTATTGGCCTGGTTCACTCAGAccatatgataaaccaccaagatatattgtacttgtgtggttttgggttTGATTGAGCCGTGCCAATATCtcact	1	mtr-MIR171d,	mtr-MIR171d	aatgagatattggcctggttcactcagaccaagtgataaaccactaagatacagtattgtacttgtgtggttttgggttTGATTGAGCCGTGCCAATATCtcact	mtr-miR171d	TGATTGAGCCGTGCCAATATC	3'	Yes	gp1	..((((((((((((..((((((.(((((((.......(((((((((((((.....)).)))).)))))))..))))))).))))))..))))))))))))..	98	40.2	-49.6	1.2	44.981	55.6333	41.2452	58.2333	41.2762	55.3857	52.7517	52.2212	47.0767	59.2193	42.0647	53.6296	middle
48	78	mtr-MIR171b-p5	GTATTGGCGCGCCTCAATTTG	21	chr2.1	-	13649454	13649547	agcaagGTATTGGCGCGCCTCAATTTGaatacatggctataaaaatgcatcatatcagccatgtagtttgaTTGAGCCGCGTCAATATCTTGtt	1	mtr-MIR171b,	mtr-MIR171b	agcaaggtattggcgcgcctcaatttgaatacatggctataaaaatgcatcatatcagccatgtagttTGATTGAGCCGCGTCAATATCttgtt	mtr-MIR171b-p5	gtattggcgcgcctcaatttg	5'	New	gp1	(((((((((((((((((.(((((((....((((((((((((...........))).)))))))))....))))))).)))))))))))))))))	94	40.4	-47	1.2	31	56	43	39	35	35	36.3554	52.5654	49.0795	39.6603	35.6686	33.8902	middle
48	79	mtr-MIR171b-p3_1ss20TC	TTGAGCCGCGTCAATATCTCG	21	chr2.1	-	13649454	13649547	agcaagGTATTGGCGCGCCTCAATTTGaatacatggctataaaaatgcatcatatcagccatgtagtttgaTTGAGCCGCGTCAATATCTTGtt	1	mtr-MIR171b,	mtr-MIR171b	agcaaggtattggcgcgcctcaatttgaatacatggctataaaaatgcatcatatcagccatgtagttTGATTGAGCCGCGTCAATATCttgtt	mtr-MIR171b-p3	TTGAGCCGCGTCAATATCttg	3'	New	gp1	(((((((((((((((((.(((((((....((((((((((((...........))).)))))))))....))))))).)))))))))))))))))	94	40.4	-47	1.2	406	431	437	408	350	445	476.139	404.566	498.785	414.908	356.686	430.89	middle
49	80	mtr-MIR171c-p5	TATTGGCTTGGTTCACTCAGA	21	chr5.3	+	13510161	13510259	attgagaTATTGGCTTGGTTCACTCAGAaaaaacaaaaaataacactacttgtgaatgttttgattttgatttTGATTGAGCCGTGCCAATATTtcaaa	1	mtr-MIR171c,	mtr-MIR171c	attgagatattggcttggttcactcagaagaaacaaaaaataacactacttgtgaatgttttgattttgattttgatttTGATTGAGCCGTGCCAATATTtcaaa	mtr-MIR171c-p5	tattggcttggttcactcaga	5'	New	gp1	.(((((((((((((..((((((.(((((((((((((((.....(((.....)))....))))).))))..)))))).))))))..))))))))))))).	97	30.3	-36.5	1.2	29	28	32	35	34	65	34.0099	26.2827	36.5243	35.5926	34.6495	62.939	middle
49	81	mtr-miR171c	TGATTGAGCCGTGCCAATATT	21	chr5.3	+	13510161	13510259	attgagaTATTGGCTTGGTTCACTCAGAaaaaacaaaaaataacactacttgtgaatgttttgattttgatttTGATTGAGCCGTGCCAATATTtcaaa	1	mtr-MIR171c,	mtr-MIR171c	attgagatattggcttggttcactcagaagaaacaaaaaataacactacttgtgaatgttttgattttgattttgatttTGATTGAGCCGTGCCAATATTtcaaa	mtr-miR171c	TGATTGAGCCGTGCCAATATT	3'	Yes	gp1	.(((((((((((((..((((((.(((((((((((((((.....(((.....)))....))))).))))..)))))).))))))..))))))))))))).	97	30.3	-36.5	1.2	137.714	217	150.429	186	115.143	166.286	161.505	203.691	171.697	189.149	117.342	161.013	middle
50	82	mes-MIR171c-p5	AGATATTGGTGCGGTTCAATC	21	chr2.3	+	64814215	64814296	gAGATATTGGTGCGGTTCAATCagaaggaagtgctttatgattctaaagctctcttattTGATTGAGCCGTGCCAATATCac	1	mes-MIR171c,	mes-MIR171c	acgagatattggtgcggttcaatcagagagcagtgctctatgaatagagctttgttgtttgaTTGAGCCGTGCCAATATCACGt	mes-MIR171c-p5	agatattggtgcggttcaatc	5'	New	gp1	..((((((((..(((((((((((((((((.(.((((((......)))))).))))).)))))))))))))..))))))))..	78	40.2	-44.8	1.4	20	31.6667	19	14.3333	27	33.3333	23.4551	29.7245	21.6863	14.576	27.5158	32.2764	middle
50	83	mes-MIR171c-p3	TGATTGAGCCGTGCCAATATC	21	chr2.3	+	64814215	64814296	gAGATATTGGTGCGGTTCAATCagaaggaagtgctttatgattctaaagctctcttattTGATTGAGCCGTGCCAATATCac	1	mes-MIR171c,	mes-MIR171c	acgagatattggtgcggttcaatcagagagcagtgctctatgaatagagctttgttgtttgaTTGAGCCGTGCCAATATCACGt	mes-MIR171c-p3	tgaTTGAGCCGTGCCAATATC	3'	New	gp1	..((((((((..(((((((((((((((((.(.((((((......)))))).))))).)))))))))))))..))))))))..	78	40.2	-44.8	1.4	44.981	55.6333	41.2452	58.2333	41.2762	55.3857	52.7517	52.2212	47.0767	59.2193	42.0647	53.6296	middle
51	84	mtr-MIR171f-p5	AGATATTGGTGCGGTTCAATC	21	chr8.1	+	1847679	1847774	gatgAGATATTGGTGCGGTTCAATCagaaggcagtgcttttatagttcaaaaaagctctgtgttattTGATTGAGCCGTGCCAATATCacgtgtta	1	mtr-MIR171f,	mtr-MIR171f	gatgagatattggtgcggttcaatcagaaggcagtgcttttataattcaaaaagctctgtgttattTGATTGAGCCGTGCCAATATCacgtgtta	mtr-MIR171f-p5	agatattggtgcggttcaatc	5'	New	gp1	.(((.((((((((..(((((((((((((..((((.((((((.........)))))).))))....)))))))))))))..)))))))).)))....	91	39.6	-46.8	1.2	20	31.6667	19	14.3333	27	33.3333	23.4551	29.7245	21.6863	14.576	27.5158	32.2764	middle
51	85	mtr-miR171d	TGATTGAGCCGTGCCAATATC	21	chr8.1	+	1847679	1847774	gatgAGATATTGGTGCGGTTCAATCagaaggcagtgcttttatagttcaaaaaagctctgtgttattTGATTGAGCCGTGCCAATATCacgtgtta	1	mtr-MIR171f,	mtr-MIR171f	gatgagatattggtgcggttcaatcagaaggcagtgcttttataattcaaaaagctctgtgttattTGATTGAGCCGTGCCAATATCacgtgtta	mtr-miR171d	TGATTGAGCCGTGCCAATATC	3'	Yes	gp1	.(((.((((((((..(((((((((((((..((((.((((((.........)))))).))))....)))))))))))))..)))))))).)))....	91	39.6	-46.8	1.2	44.981	55.6333	41.2452	58.2333	41.2762	55.3857	52.7517	52.2212	47.0767	59.2193	42.0647	53.6296	middle
52	86	mtr-MIR171g-p5	CGTGATATTGATCCGGCTCATC	22	chr3.1	-	73879934	73880059	gcttcagctgcaaaagtatacatggCGTGATATTGATCCGGCTCATCtatatttcaaccatccatattcatatcaatttcagaCGAGCCGAATCAATATCACTCttgtttgcttcattgcatatta	2	mtr-MIR171g,gma-MIR171b,	mtr-MIR171g	gcttcagctgcaaaagtatacatggcgtgatattgatccggctcatctatatcttcaagttcaatcatccatattcatatcaatttcagaCGAGCCGAATCAATATCACTCttgtttgcttcattgcatattaatt	mtr-MIR171g-p5	cgtgatattgatccggctcatc	5'	New	gp1	........((((((((((.(((.((.(((((((((((.((((((.(((................................))).)))))).))))))))))).))))).)))))..))))).....	113	37.3	-38.331	0.8	56	39	120	196	67	183	65.6744	36.608	136.966	199.318	68.2798	177.198	middle
52	87	mtr-miR171g_1ss17CT	CGAGCCGAATCAATATTACTC	21	chr3.1	-	73879934	73880059	gcttcagctgcaaaagtatacatggCGTGATATTGATCCGGCTCATCtatatttcaaccatccatattcatatcaatttcagaCGAGCCGAATCAATATCACTCttgtttgcttcattgcatatta	2	mtr-MIR171g,gma-MIR171b,	mtr-MIR171g	gcttcagctgcaaaagtatacatggcgtgatattgatccggctcatctatatcttcaagttcaatcatccatattcatatcaatttcagaCGAGCCGAATCAATATCACTCttgtttgcttcattgcatattaatt	mtr-miR171g	CGAGCCGAATCAATATCACTC	3'	Diff	gp1	........((((((((((.(((.((.(((((((((((.((((((.(((................................))).)))))).))))))))))).))))).)))))..))))).....	113	37.3	-38.331	0.8	52	59.5	84	69	42.5	73	60.9833	55.8507	95.8763	70.1682	43.3118	70.6854	middle
53	88	mtr-MIR171a-p5_1ss8TA	TGTTGGCATGTCTCAATCAAA	21	chr7.2	+	71367526	71367634	tgaattcccctccgctttttgaTGTTGGCATGTCTCAATCAAAtcaaagttcttgaaatttgagttctttagtcTGATTGAGTCGTGCCAATATCatattaagcgataa	1	mtr-MIR171a,	mtr-MIR171a	tgaattcccctccgctttttgatgttggcttgtctcaatcaaatcaaagttcttgaaatttgagttctttagtcTGATTGAGTCGTGCCAATATCatattaagcgataaaagtc	mtr-MIR171a-p5	tgttggcttgtctcaatcaaa	5'	New	gp1	............(((((..(((((((((((((.((((((((.(..((((..((..(...)..))..))))..).)))))))).)))))))))))))....)))))....	93	35.8	-44.9	1.2	11	5	0	5	7	5	12.9003	4.69334	0	5.08465	7.13371	4.84146	middle
53	89	mtr-miR171a	TGATTGAGTCGTGCCAATATC	21	chr7.2	+	71367526	71367634	tgaattcccctccgctttttgaTGTTGGCATGTCTCAATCAAAtcaaagttcttgaaatttgagttctttagtcTGATTGAGTCGTGCCAATATCatattaagcgataa	1	mtr-MIR171a,	mtr-MIR171a	tgaattcccctccgctttttgatgttggcttgtctcaatcaaatcaaagttcttgaaatttgagttctttagtcTGATTGAGTCGTGCCAATATCatattaagcgataaaagtc	mtr-miR171a	TGATTGAGTCGTGCCAATATC	3'	Yes	gp1	............(((((..(((((((((((((.((((((((.(..((((..((..(...)..))..))))..).)))))))).)))))))))))))....)))))....	93	35.8	-44.9	1.2	342	311	168	230	328	215	401.083	291.925	191.753	233.894	334.265	208.183	middle
54	90	gma-miR171c-3p	TTGAGCCGTGCCAATATCACA	21	chr2.1	+	65176977	65177062	tgagatattggtgcggttcaatcagaaggaagtgctttatgattctaaagctctcttatttgaTTGAGCCGTGCCAATATCACAtg	2	gma-MIR171o,gma-MIR171f,	gma-MIR171f	gAGATATTGGTACGGTTCAATCagaaggcagtgctttatgatttcaaagctctcttatttgaTTGAGCCGTGCCAATATCACAtgcaaac	gma-miR171c-3p	TTGAGCCGTGCCAATATCACA	3'	Yes	gp1	((.((((((((..(((((((((((((((((.(.((((((......)))))).))))).)))))))))))))..)))))))).))..	84	39.5	-44.9	1.3	283.481	266.133	286.245	189.733	136.276	231.886	332.454	249.811	326.716	192.946	138.879	224.533	middle
55	91	gma-miR171c-5p	AGATATTGGTGCGGTTCAATC	21	chr8.2	-	1650208	1650301	tgAGATATTGGTGCGGTTCAATCagaaggcagtgcttttatattcaaaaaagctctgtgttatttgaTTGAGCCGTGCCAATATCACGtgttat	1	gma-MIR171c,	gma-MIR171c	ttaagaacttgAGATATTGGTGCGGTTCAATCagaaggcagtgttttatgatccaaaagctctgtgttatttgaTTGAGCCGTGCCAATATCACAtgttattga	gma-miR171c-5p	AGATATTGGTGCGGTTCAATC	5'	Yes	gp1	...((((((((..(((((((((((((..((((.((((((........)))))).))))....)))))))))))))..)))))))).........	82	38.3	-46.2	1.3	20	31.6667	19	14.3333	27	33.3333	23.4551	29.7245	21.6863	14.576	27.5158	32.2764	middle
55	92	gma-miR171c-3p	TTGAGCCGTGCCAATATCACA	21	chr8.2	-	1650208	1650301	tgAGATATTGGTGCGGTTCAATCagaaggcagtgcttttatattcaaaaaagctctgtgttatttgaTTGAGCCGTGCCAATATCACGtgttat	1	gma-MIR171c,	gma-MIR171c	ttaagaacttgAGATATTGGTGCGGTTCAATCagaaggcagtgttttatgatccaaaagctctgtgttatttgaTTGAGCCGTGCCAATATCACAtgttattga	gma-miR171c-3p	TTGAGCCGTGCCAATATCACA	3'	Yes	gp1	...((((((((..(((((((((((((..((((.((((((........)))))).))))....)))))))))))))..)))))))).........	82	38.3	-46.2	1.3	283.481	266.133	286.245	189.733	136.276	231.886	332.454	249.811	326.716	192.946	138.879	224.533	middle
56	93	mtr-miR172d-5p_L-3	GGAGCATCATCAAGATTCACA	21	chr3.1	-	56217753	56217870	agtcagtgtttgctagtGGAGCATCATCAAGATTCACAagctttaaagggcttcaaatcaattagcccttctttatgttatgAGAATCTTGATGATGCTGCAGcagcaattgatgact	1	mtr-MIR172d,	mtr-MIR172d	agtcagtgtttgctAGTGGAGCATCATCAAGATTCACAagctttatagggcttcaaatcaattagcccttcttcatgttatgAGAATCTTGATGATGCTGCAgcagcaattgatgact	mtr-miR172d-5p	AGTGGAGCATCATCAAGATTCACA	5'	Diff	gp1	(((((....(((((..((.((((((((((((((((.(((((....(((((((...........)))))))......))).)).)))))))))))))))).))..)))))....)))))	118	39	-52.2	1.1	54	39	66	112	50	55	63.3288	36.608	75.3314	113.896	50.9551	53.2561	middle
56	94	mtr-miR172d-3p_R+1	AGAATCTTGATGATGCTGCAG	21	chr3.1	-	56217753	56217870	agtcagtgtttgctagtGGAGCATCATCAAGATTCACAagctttaaagggcttcaaatcaattagcccttctttatgttatgAGAATCTTGATGATGCTGCAGcagcaattgatgact	1	mtr-MIR172d,	mtr-MIR172d	agtcagtgtttgctAGTGGAGCATCATCAAGATTCACAagctttatagggcttcaaatcaattagcccttcttcatgttatgAGAATCTTGATGATGCTGCAgcagcaattgatgact	mtr-miR172d-3p	AGAATCTTGATGATGCTGCA	3'	Diff	gp1	(((((....(((((..((.((((((((((((((((.(((((....(((((((...........)))))))......))).)).)))))))))))))))).))..)))))....)))))	118	39	-52.2	1.1	881.5	953.167	672.167	1511	610.667	874.833	1033.78	894.706	767.2	1536.58	622.332	847.095	high
57	95	mtr-MIR172a-p5	GGAGCATCATCAGGATTCACA	21	chr5.2	-	68004680	68004789	ggtGGAGCATCATCAGGATTCACAaggttttaaggggtttaatttgttttgattgtttcaaatatattagccctttgacatatgAGAATCCTGATGATGCTGCAGctgca	1	mtr-MIR172a,	mtr-MIR172a	gccggtggagcatcatcaggattcacaagattttgaagggtttaatttgttttgattgtttcaaatagattagccctttgacatatgAGAATCCTGATGATGCTGCAGctgca	mtr-MIR172a-p5	ggagcatcatcaggattcaca	5'	New	gp1	((((.((((((((((((((((.((..((.((((((((((.(((....(((((.....)))))...))))))))))))).)).)).)))))))))))))))).)).))...	107	38.2	-47.3	1.1	46	30	57	21	0	71	53.9468	28.16	65.0589	21.3555	0	68.7488	middle
57	96	mtr-miR172a	AGAATCCTGATGATGCTGCAG	21	chr5.2	-	68004680	68004789	ggtGGAGCATCATCAGGATTCACAaggttttaaggggtttaatttgttttgattgtttcaaatatattagccctttgacatatgAGAATCCTGATGATGCTGCAGctgca	1	mtr-MIR172a,	mtr-MIR172a	gccggtggagcatcatcaggattcacaagattttgaagggtttaatttgttttgattgtttcaaatagattagccctttgacatatgAGAATCCTGATGATGCTGCAGctgca	mtr-miR172a	AGAATCCTGATGATGCTGCAG	3'	Yes	gp1	((((.((((((((((((((((.((..((.((((((((((.(((....(((((.....)))))...))))))))))))).)).)).)))))))))))))))).)).))...	107	38.2	-47.3	1.1	86	92	76	40	22	88	100.857	86.3574	86.7452	40.6772	22.4202	85.2097	middle
58	97	mtr-miR172c-5p	GTAGCATCATCAAGATTCACA	21	chr4.1	-	39808932	39809068	tatttgcagatGTAGCATCATCAAGATTCACAtgaaaatgcaaatggtttgtttggattttgatctgatcgatgcaaatctaagttcttcataggtcttttgaactgAGAATCTTGATGATGCTGCATcagccataa	1	mtr-MIR172c,	mtr-MIR172c	tatttgcagatGTAGCATCATCAAGATTCACAtatgaaagtgcaaatggttttgttggattttgatctgatcgatgcaaatctaagttctccataggtcttttgaactgAGAATCTTGATGATGCTGCATcagccataa	mtr-miR172c-5p	GTAGCATCATCAAGATTCACA	5'	Yes	gp1	.....((.(((((((((((((((((((((.(((....))).....(((((((...((((.......))))...)))))))..(((((..............)))))..))))))))))))))))))))).)).....	127	35	-49.9	1	50.5	91	40	170.5	107.5	199	59.2242	85.4187	45.6554	173.387	109.553	192.69	middle
58	98	mtr-miR172b	AGAATCTTGATGATGCTGCAT	21	chr4.1	-	39808932	39809068	tatttgcagatGTAGCATCATCAAGATTCACAtgaaaatgcaaatggtttgtttggattttgatctgatcgatgcaaatctaagttcttcataggtcttttgaactgAGAATCTTGATGATGCTGCATcagccataa	1	mtr-MIR172c,	mtr-MIR172c	tatttgcagatGTAGCATCATCAAGATTCACAtatgaaagtgcaaatggttttgttggattttgatctgatcgatgcaaatctaagttctccataggtcttttgaactgAGAATCTTGATGATGCTGCATcagccataa	mtr-miR172b	AGAATCTTGATGATGCTGCAT	3'	Yes	gp1	.....((.(((((((((((((((((((((.(((....))).....(((((((...((((.......))))...)))))))..(((((..............)))))..))))))))))))))))))))).)).....	127	35	-49.9	1	4971.5	6858.67	4934.17	6366.5	4782.17	4666.33	5830.36	6438.01	5631.78	6474.29	4873.52	4518.38	high
59	99	mtr-MIR172b-p5	GTAGCATCATCAAGATTCAT	20	chr2.1	+	8284416	8284527	tgtttgcagatGTAGCATCATCAAGATTCATatgtgaatgatgcagtggaactgctaatacttccattgatcttttgaaatgAGAATCTTGATGATGCTGCATcagccatat	1	mtr-MIR172b,	mtr-MIR172b	tgtttgcagatgtagcatcatcaagattcatatgtgaatgatgcagagtggaactgctaatatttcaattgatcttttgaaataAGAATCTTGATGATGCTGCATcagccatat	mtr-MIR172b-p5	gtagcatcatcaagattcat	5'	New	gp1	.....((.(((((((((((((((((((((..((..(((.(((.((((((((.((....)).))))))))))).)))...))..))))))))))))))))))))).)).....	102	36.6	-47.6	1.2	915.5	1038	806	900.5	1271.5	825	1073.66	974.337	919.956	915.746	1295.79	798.841	high
59	100	mtr-miR172b	AGAATCTTGATGATGCTGCAT	21	chr2.1	+	8284416	8284527	tgtttgcagatGTAGCATCATCAAGATTCATatgtgaatgatgcagtggaactgctaatacttccattgatcttttgaaatgAGAATCTTGATGATGCTGCATcagccatat	1	mtr-MIR172b,	mtr-MIR172b	tgtttgcagatgtagcatcatcaagattcatatgtgaatgatgcagagtggaactgctaatatttcaattgatcttttgaaataAGAATCTTGATGATGCTGCATcagccatat	mtr-miR172b	AGAATCTTGATGATGCTGCAT	3'	Yes	gp1	.....((.(((((((((((((((((((((..((..(((.(((.((((((((.((....)).))))))))))).)))...))..))))))))))))))))))))).)).....	102	36.6	-47.6	1.2	4971.5	6858.67	4934.17	6366.5	4782.17	4666.33	5830.36	6438.01	5631.78	6474.29	4873.52	4518.38	high
60	101	mtr-MIR319d-p5	AGCTGCTGACTCATTCATTCA	21	chr3.1	+	52859817	52860023	agaaaaatagttcaagagagctctcttcagtccactcatggataggaaaaggttttgaattAGCTGCTGACTCATTCATTCAaacacaataggaacaagcatcatgaatatgctatattgtgaatgtgtgaatgatgcgggagctaaatttcatctttctcttgtctttgcTTGGACTGAAGGGAGCTCCCttttgctgtttatata	7	mtr-MIR319d,mtr-MIR4414b,gma-MIR319k,gma-MIR319e,gma-MIR319m,gma-MIR319h,rco-MIR319c,	mtr-MIR319d	agaaaaatagttcaagAGAGCTCTCTTCAGTCCACTCatggataggaaaaggttttgaattagctgctgactcattcattcaaacacaataagaagaagcatgatgaatatgctatattgtgaatgtgtgaatgatgcgggagctaaatttcatctttctcttgtctttgcTTGGACTGAAGGGAGCTCCCttttgctgtttatata	mtr-MIR319d-p5	agctgctgactcattcattca	5'	New	gp1	....(((((((..(((.(((((((((((((((((..((..(((((((((((((...((.((((((.(((..(((((((..((..(((((((......(((((.......))))).)))))))..))..)))))))..))).)))))).))..)))))).)))))))..))..))))))))))))))))).)))..))))))).....	198	37.7	-86.4	1.1	11	21	8	8	0	7	12.9003	19.712	9.13107	8.13545	0	6.77805	middle
60	102	mtr-miR319a-3p	TTGGACTGAAGGGAGCTCCC	20	chr3.1	+	52859817	52860023	agaaaaatagttcaagagagctctcttcagtccactcatggataggaaaaggttttgaattAGCTGCTGACTCATTCATTCAaacacaataggaacaagcatcatgaatatgctatattgtgaatgtgtgaatgatgcgggagctaaatttcatctttctcttgtctttgcTTGGACTGAAGGGAGCTCCCttttgctgtttatata	7	mtr-MIR319d,mtr-MIR4414b,gma-MIR319k,gma-MIR319e,gma-MIR319m,gma-MIR319h,rco-MIR319c,	mtr-MIR319d	agaaaaatagttcaagAGAGCTCTCTTCAGTCCACTCatggataggaaaaggttttgaattagctgctgactcattcattcaaacacaataagaagaagcatgatgaatatgctatattgtgaatgtgtgaatgatgcgggagctaaatttcatctttctcttgtctttgcTTGGACTGAAGGGAGCTCCCttttgctgtttatata	mtr-miR319a-3p	TTGGACTGAAGGGAGCTCCC	3'	Yes	gp1	....(((((((..(((.(((((((((((((((((..((..(((((((((((((...((.((((((.(((..(((((((..((..(((((((......(((((.......))))).)))))))..))..)))))))..))).)))))).))..)))))).)))))))..))..))))))))))))))))).)))..))))))).....	198	37.7	-86.4	1.1	740.1	369.4	561.3	461.833	174.1	845.717	867.957	346.744	640.659	469.653	177.426	818.901	middle
61	103	mtr-miR319a-3p	TTGGACTGAAGGGAGCTCCC	20	chr5.1	+	58331621	58331826	attattaggaattgatgaagagagcttccttcagtccactcatggaagggtaaggggtttgaattacctgctgactcattgattcaaacacaatagacaattatgggaatgctattgtgaatgtgtgaatgatgcaggaggtgaatttcttccttttcttctttgcTTGGACTGAAGGGAGCTCCCtttttctctttataagatta	1	mtr-MIR319a,	mtr-MIR319a	attattagaaatagatgaagAGAGCTTCCTTCAGTCCACTCatggaagggtaaggggtttgaattacctgctgactcattgattcaaacacaatagacaattatggggttatgctattgtgaatgtgtgaatgatgcaggaggtgaatttcttccttttcttctttgcTTGGACTGAAGGGAGCTCCCtttttctatttataaatta	mtr-miR319a-3p	TTGGACTGAAGGGAGCTCCC	3'	Yes	gp1	.((((.((((...((..(((.(((((((((((((((((..((..(((((..((((((...((.((((((.(((..(((((.(..((..((((((((.((.((....)).))))))))))..))..).)))))..))).)))))).))...)))))))))))..))..))))))))))))))))).)))..)))))).)))).....	200	38.3	-81.1	1	740.1	369.4	561.3	461.833	174.1	845.717	867.957	346.744	640.659	469.653	177.426	818.901	middle
62	104	mtr-miR319a-3p	TTGGACTGAAGGGAGCTCCC	20	chr2.1	-	36626111	36626199	cagaaatgggagttccttgcagcccaaagcgccaagtgagagttctactggcaaattctgttTTGGACTGAAGGGAGCTCCTagttctt	1	mtr-MIR319c,	mtr-MIR319c	cagaaatgGGAGTTCCTTGCAGCCCAAAGcgccaagtgagaattctactggcaaattatgttTTGGACTGAAGGGAGCTCCCagttctt	mtr-miR319a-3p	TTGGACTGAAGGGAGCTCCC	3'	Yes	gp1	.((((.((((((((((((.(((.(((((((((((.((.((....)))))))).......))))))).))).)))))))))))).)))).	87	48.3	-40	0.9	740.1	369.4	561.3	461.833	174.1	845.717	867.957	346.744	640.659	469.653	177.426	818.901	middle
63	105	gma-miR319a	TTGGACTGAAGGGAGCTCCC	20	chr5.2	+	3300789	3300970	ggtaagagagctttctttagtccactcatgggtgacaataggatttcaattagctgctgactcattcatccaaatgttgagtgaatatataaaaacatatactcatcaaatgagtgaatgatgcgggagacaaattgaatcttaagtttcctatacTTGGACTGAAGGGAGCTCCCttttct	1	gma-MIR319j,	gma-MIR319j	aggtaagagagctctcttcagcccactcataggtgataataggatttaattagctgccgactcattcatacacatgctgagtgaattaatgaataatactcagtaaatgagtgaatgatacgggagacaaattgaatcttatgttttctgtacTTGGACTGAAGGGAGCTCCCttttct	gma-miR319a	TTGGACTGAAGGGAGCTCCC	3'	Yes	gp1	(..(((.(((((..((((((((((...(((((..((..(((((((.(((((..((.(((..(((((((..((..((.(((((..((((........))))))))).))..))..)))))))..))).))...)))))))))))).))..)))))...))))))))))..))))).)))..).	181	37.4	-68	1	740.1	369.4	561.3	461.833	174.1	845.717	867.957	346.744	640.659	469.653	177.426	818.901	middle
64	106	mtr-miR319b-5p_L+1R-1	AGAGCTTTCTTTAGTCCACTC	21	chr5.1	+	3291919	3292097	taagAGAGCTTTCTTTAGTCCACTCatgggtgacaataggatttcaattagctgctgactcattcatccaaatgttgagtaaatatatagaaacatatactcatcaaatgagtgaatgatgcgggagacaaattgaatcttaagtttcctatacTTGGACTGAAGGGAGCTCCCttttc	1	mtr-MIR319b,	mtr-MIR319b	taagaGAGCTTTCTTTAGTCCACTCAtgggtgacaataagatttcaattagctgctgactcattcatccaaatgttgagtaaaatatatagaaacatatactcatcaaatgagtgaatgatgcgggagacaaattgaatcttaagtttcctatacTTGGACTGAAGGGAGCTCCCttttc	mtr-miR319b-5p	GAGCTTTCTTTAGTCCACTCA	5'	Diff	gp1	.(((.(((((..((((((((((...(((((..((..(((((((.(((((..((.(((..(((((((..((..((.((((((................)))))).))..))..)))))))..))).))...)))))))))))).))..)))))...))))))))))..))))).)))...	175	36.9	-67.3	1	5	0	6	7	0	11	5.86378	0	6.84831	7.11852	0	10.6512	middle
64	107	mtr-miR319a-3p	TTGGACTGAAGGGAGCTCCC	20	chr5.1	+	3291919	3292097	taagAGAGCTTTCTTTAGTCCACTCatgggtgacaataggatttcaattagctgctgactcattcatccaaatgttgagtaaatatatagaaacatatactcatcaaatgagtgaatgatgcgggagacaaattgaatcttaagtttcctatacTTGGACTGAAGGGAGCTCCCttttc	1	mtr-MIR319b,	mtr-MIR319b	taagaGAGCTTTCTTTAGTCCACTCAtgggtgacaataagatttcaattagctgctgactcattcatccaaatgttgagtaaaatatatagaaacatatactcatcaaatgagtgaatgatgcgggagacaaattgaatcttaagtttcctatacTTGGACTGAAGGGAGCTCCCttttc	mtr-miR319a-3p	TTGGACTGAAGGGAGCTCCC	3'	Yes	gp1	.(((.(((((..((((((((((...(((((..((..(((((((.(((((..((.(((..(((((((..((..((.((((((................)))))).))..))..)))))))..))).))...)))))))))))).))..)))))...))))))))))..))))).)))...	175	36.9	-67.3	1	740.1	369.4	561.3	461.833	174.1	845.717	867.957	346.744	640.659	469.653	177.426	818.901	middle
65	108	mtr-miR390	AAGCTCAGGAGGGATAGCGCC	21	chr4.2	+	86783999	86784098	ctgttAAGCTCAGGAGGGATAGCGCCatagaatgtcttctttttttggttccatttgatccattgatcttctctagCGCTATCCATCCTGAGTTTCAtgg	1	mtr-MIR390,	mtr-MIR390	ctgttAAGCTCAGGAGGGATAGCGCCatagaatgtcttctttttttggttccattttattgattgatcttctcttgcgctatccatcctgagtttcatgg	mtr-miR390	AAGCTCAGGAGGGATAGCGCC	5'	Yes	gp1	(..(.((((((((((.(((((((((...((((..((.........(((.((.....)).)))..))..))))...))))))))).)))))))))).)..)	100	43	-39.3	0.9	1475	1457	1322	1431	611	2130	1729.82	1367.64	1508.91	1455.23	622.671	2062.46	high
65	109	mtr-MIR390-p3	CGCTATCCATCCTGAGTTTCA	21	chr4.2	+	86783999	86784098	ctgttAAGCTCAGGAGGGATAGCGCCatagaatgtcttctttttttggttccatttgatccattgatcttctctagCGCTATCCATCCTGAGTTTCAtgg	1	mtr-MIR390,	mtr-MIR390	ctgttAAGCTCAGGAGGGATAGCGCCatagaatgtcttctttttttggttccattttattgattgatcttctcttgcgctatccatcctgagtttcatgg	mtr-MIR390-p3	cgctatccatcctgagtttca	3'	New	gp1	(..(.((((((((((.(((((((((...((((..((.........(((.((.....)).)))..))..))))...))))))))).)))))))))).)..)	100	43	-39.3	0.9	34	41	17	29	16	33	39.8737	38.4854	19.4035	29.491	16.3056	31.9537	middle
66	110	mtr-miR393a_R+1	TCCAAAGGGATCGCATTGATCC	22	chr3.1	+	57191634	57191770	aactgcaacttgaggaggcaTCCAAAGGGATCGCATTGATCCtataatatatttcaactttactctctttaattttccctaatacaatatttaattgggATCATGCCATCCCTTTGGATTtctcctttagtggctac	1	mtr-MIR393a,	mtr-MIR393a	aactgcaacttgaggaggcaTCCAAAGGGATCGCATTGATCctataatatttcaactttagtcactttaattttctctcatataatacttaattgggatcatgccatccctttggatttctcctttagtagctac	mtr-miR393a	TCCAAAGGGATCGCATTGATC	5'	Diff	gp1	....((.(((..(((((..((((((((((((.((((.(((((((....(((((................................))))).....))))))))))).))))))))))))..)))))..))).))...	130	36.5	-49.231	1	48	58.5	45	70	64.5	51	56.2923	54.912	51.3623	71.1852	65.7321	49.3829	middle
66	111	mtr-MIR393a-p3	ATCATGCCATCCCTTTGGATT	21	chr3.1	+	57191634	57191770	aactgcaacttgaggaggcaTCCAAAGGGATCGCATTGATCCtataatatatttcaactttactctctttaattttccctaatacaatatttaattgggATCATGCCATCCCTTTGGATTtctcctttagtggctac	1	mtr-MIR393a,	mtr-MIR393a	aactgcaacttgaggaggcaTCCAAAGGGATCGCATTGATCctataatatttcaactttagtcactttaattttctctcatataatacttaattgggatcatgccatccctttggatttctcctttagtagctac	mtr-MIR393a-p3	atcatgccatccctttggatt	3'	New	gp1	....((.(((..(((((..((((((((((((.((((.(((((((....(((((................................))))).....))))))))))).))))))))))))..)))))..))).))...	130	36.5	-49.231	1	18	14	13	11	24	12	21.1096	13.1413	14.838	11.1862	24.4585	11.6195	middle
67	112	mtr-miR393a_R+1	TCCAAAGGGATCGCATTGATCC	22	chr5.1	-	63722268	63722386	aggcaTCCAAAGGGATCGCATTGATCCcaaatctaattaagtccctagctacttaattaatatcttaatttccttaatttctcataatatttgggATCATGCTATCCCTTTGGATTcat	1	mtr-MIR393b,	mtr-MIR393b	aggcaTCCAAAGGGATCGCATTGATCccaaatctaattaagtccctagctacttaattaacaacttaatttccttaatatctcataataTTTGGGATCATGCTATCCCTTtggattcat	mtr-miR393a	TCCAAAGGGATCGCATTGATC	5'	Diff	gp1	.((.((((((((((((.((((.((((((((((.(((((((((........))))))))).......((((.....)))).........)))))))))))))).))))))))))))))..	116	33.6	-43.8	1.1	48	58.5	45	70	64.5	51	56.2923	54.912	51.3623	71.1852	65.7321	49.3829	middle
67	113	mtr-MIR393b-p3	ATCATGCTATCCCTTTGGATT	21	chr5.1	-	63722268	63722386	aggcaTCCAAAGGGATCGCATTGATCCcaaatctaattaagtccctagctacttaattaatatcttaatttccttaatttctcataatatttgggATCATGCTATCCCTTTGGATTcat	1	mtr-MIR393b,	mtr-MIR393b	aggcaTCCAAAGGGATCGCATTGATCccaaatctaattaagtccctagctacttaattaacaacttaatttccttaatatctcataataTTTGGGATCATGCTATCCCTTtggattcat	mtr-MIR393b-p3	ATCATGCTATCCCTTtggatt	3'	New	gp1	.((.((((((((((((.((((.((((((((((.(((((((((........))))))))).......((((.....)))).........)))))))))))))).))))))))))))))..	116	33.6	-43.8	1.1	94	70	56	72	46	39	110.239	65.7067	63.9175	73.219	46.8787	37.7634	middle
68	114	mtr-MIR395o-p5	AGTTCCTCTGAACTCTTCATC	21	chr5.3	-	26931503	26931585	gAGTTCCTCTGAACTCTTCATCtaaagggctatagcaagaaagaaaggaaaatccttgtatgATGAAGTGTTTGGGGGAACTC	1	mtr-MIR395o,	mtr-MIR395o	gagttcctctgaactcttcatctaaagggctatagcaagaaagaaaggaaaatccttgtatgATGAAGTGTTTGGGGGAACTC	mtr-MIR395o-p5	agttcctctgaactcttcatc	5'	New	gp1	(((((((((..(((.(((((((......((....))........((((.....))))....))))))).)))..)))))))))	83	41	-36	1.1	8	33	29	0	5	6	9.38205	30.976	33.1001	0	5.09551	5.80976	middle
68	115	mtr-miR395a	ATGAAGTGTTTGGGGGAACTC	21	chr5.3	-	26931503	26931585	gAGTTCCTCTGAACTCTTCATCtaaagggctatagcaagaaagaaaggaaaatccttgtatgATGAAGTGTTTGGGGGAACTC	1	mtr-MIR395o,	mtr-MIR395o	gagttcctctgaactcttcatctaaagggctatagcaagaaagaaaggaaaatccttgtatgATGAAGTGTTTGGGGGAACTC	mtr-miR395a	ATGAAGTGTTTGGGGGAACTC	3'	Yes	gp1	(((((((((..(((.(((((((......((....))........((((.....))))....))))))).)))..)))))))))	83	41	-36	1.1	0	5.5	5.16667	0	3.5	0	0	5.16267	5.89715	0	3.56686	0	middle
69	116	mtr-MIR395j-p5_1ss21AC	AGTTCCTCTGAATGCTTCAAC	21	chr5.3	-	27173243	27173318	gAGTTCCTCTGAATGCTTCAAAcaggagacaatctatatggatagttcttgttcaATGAAGTGTTTGGGGGAACTC	2	mtr-MIR395j,mtr-MIR395i,	mtr-MIR395j	gagttcctctgaatgcttcaaacatgagacaatctatatggatagttcttgttcaATGAAGTGTTTGGGGGAACTC	mtr-MIR395j-p5	agttcctctgaatgcttcaaa	5'	New	gp1	(((((((((..((..(((((((((((((.(.((((....)))).)))))))))...)))))..))..)))))))))	76	40.8	-37.1	1.2	3.5	29	22.5	14	4.5	26.5	4.10465	27.2213	25.6811	14.237	4.58596	25.6598	middle
69	117	mtr-miR395a	ATGAAGTGTTTGGGGGAACTC	21	chr5.3	-	27173243	27173318	gAGTTCCTCTGAATGCTTCAAAcaggagacaatctatatggatagttcttgttcaATGAAGTGTTTGGGGGAACTC	2	mtr-MIR395j,mtr-MIR395i,	mtr-MIR395i	gagttcctctgaatgcttcaatcatgagacaatctatatgaatagttcttgttcaATGAAGTGTTTGGGGGAACTC	mtr-miR395a	ATGAAGTGTTTGGGGGAACTC	3'	Yes	gp1	(((((((((..((..(((((((((((((.(.((((....)))).)))))))))...)))))..))..)))))))))	76	40.8	-37.1	1.2	0	5.5	5.16667	0	3.5	0	0	5.16267	5.89715	0	3.56686	0	middle
70	118	mtr-MIR395l-p5	AGTTCCTTTGAACGCTTCATG	21	chr5.2	-	28904239	28904339	gAGTTCCTTTGAACGCTTCATGcatgagaatatctatctatttggtctaaagtccattagaaaagatagccattttttcaATGAAGTGTTTGGGGGAACTC	2	mtr-MIR395l,mtr-MIR395n,	mtr-MIR395l	gagttcctttgaacgcttcatgcatgagaatatctatctatttggtctaaagtccattagaaaagatagccattttttcaATGAAGTGTTTGGGGGAACTC	mtr-MIR395l-p5	agttcctttgaacgcttcatg	5'	New	gp1	((((((((..(((((((((((....((((((..((((((......(((((......)))))..))))))..))))))...)))))))))))..))))))))	101	36.6	-40.9	1.1	0	8.5	4	0	4	2.25	0	7.97867	4.56554	0	4.07641	2.17866	middle
70	119	mtr-miR395a	ATGAAGTGTTTGGGGGAACTC	21	chr5.2	-	28904239	28904339	gAGTTCCTTTGAACGCTTCATGcatgagaatatctatctatttggtctaaagtccattagaaaagatagccattttttcaATGAAGTGTTTGGGGGAACTC	2	mtr-MIR395l,mtr-MIR395n,	mtr-MIR395l	gagttcctttgaacgcttcatgcatgagaatatctatctatttggtctaaagtccattagaaaagatagccattttttcaATGAAGTGTTTGGGGGAACTC	mtr-miR395a	ATGAAGTGTTTGGGGGAACTC	3'	Yes	gp1	((((((((..(((((((((((....((((((..((((((......(((((......)))))..))))))..))))))...)))))))))))..))))))))	101	36.6	-40.9	1.1	0	5.5	5.16667	0	3.5	0	0	5.16267	5.89715	0	3.56686	0	middle
71	120	mtr-MIR395c-p5	AGTTCCTTTGAACGCTTCATG	21	chr5.4	-	28696526	28696622	gAGTTCCTTTGAACGCTTCATGcatgagaatatctatttggtctaaaatccattagaaaagatagttttttcttctATGAAGTGTTTGGGGGAACTC	2	mtr-MIR395c,mtr-MIR395f,	mtr-MIR395c	gagttcctttgaacgcttcatgcatgagaatatctatttggtctaatatccattagaaaagatagtcttttcttctATGAAGTGTTTGGGGGAACTC	mtr-MIR395c-p5	agttcctttgaacgcttcatg	5'	New	gp1	((((((((..((((((((((((...(((((...((((((..(((((......)))))..))))))..)))))...))))))))))))..))))))))	97	35.1	-44	1.3	0	8.5	4	0	4	2.25	0	7.97867	4.56554	0	4.07641	2.17866	middle
71	121	mtr-miR395a	ATGAAGTGTTTGGGGGAACTC	21	chr5.4	-	28696526	28696622	gAGTTCCTTTGAACGCTTCATGcatgagaatatctatttggtctaaaatccattagaaaagatagttttttcttctATGAAGTGTTTGGGGGAACTC	2	mtr-MIR395c,mtr-MIR395f,	mtr-MIR395f	gagttcctttgaacgcttcatgcatgagaaatatctctttggtttaaaatccattagaaaagatagtattttcttctATGAAGTGTTTGGGGGAACTC	mtr-miR395a	ATGAAGTGTTTGGGGGAACTC	3'	Yes	gp1	((((((((..((((((((((((...(((((...((((((..(((((......)))))..))))))..)))))...))))))))))))..))))))))	97	35.1	-44	1.3	0	5.5	5.16667	0	3.5	0	0	5.16267	5.89715	0	3.56686	0	middle
72	122	mtr-MIR395m-p5	AGTTCCTTTGAACGCTTCATG	21	chr5.2	-	28894846	28894947	gAGTTCCTTTGAACGCTTCATGcatgagactatctatctatttggtctaaaatattcattagaaaagatagttcttcttaaATGAAGTGTTTGGGGGAACTC	2	mtr-MIR395m,mtr-MIR395e,	mtr-MIR395m	gagttcctttgaacgcttcatgcatgagaatatctatctatttggtctaaaatccattagaaaagatagttcttcttaaATGAAGTGTTTGGGGGAACTC	mtr-MIR395m-p5	agttcctttgaacgcttcatg	5'	New	gp1	((((((((..(((((((((((....((((((((((.((((..(((..........))).))))..)))))).)))).....)))))))))))..))))))))	102	34.3	-41.3	1.2	0	8.5	4	0	4	2.25	0	7.97867	4.56554	0	4.07641	2.17866	middle
72	123	mtr-miR395a	ATGAAGTGTTTGGGGGAACTC	21	chr5.2	-	28894846	28894947	gAGTTCCTTTGAACGCTTCATGcatgagactatctatctatttggtctaaaatattcattagaaaagatagttcttcttaaATGAAGTGTTTGGGGGAACTC	2	mtr-MIR395m,mtr-MIR395e,	mtr-MIR395e	gagttcctttgaacgcttcatgcatgagaatatctatctatttggtttaaaatccattaggatagatagttcttcttaaATGAAGTGTTTGGGGGAACTC	mtr-miR395a	ATGAAGTGTTTGGGGGAACTC	3'	Yes	gp1	((((((((..(((((((((((....((((((((((.((((..(((..........))).))))..)))))).)))).....)))))))))))..))))))))	102	34.3	-41.3	1.2	0	5.5	5.16667	0	3.5	0	0	5.16267	5.89715	0	3.56686	0	middle
73	124	mtr-MIR395b-p5_1ss21AC	AGTTCCTCTGAATGCTTCAAC	21	chr5.2	-	28967805	28967926	tacttgttgattttctcttggAGTTCCTCTGAATGCTTCAAAcatgagacaatcttaatggaaattatggatagttattgttcaatgaagtgtttgggggaactcttggaattgaatcaaca	1	mtr-MIR395b,	mtr-MIR395b	tacttgttgattttctcttggagttcctctgaatgcttcaaacatgagacaatcttgatagaaattatggatagttcttgttcaATGAAGTATTTGGGGGAACTCttggaattgaatcaacata	mtr-MIR395b-p5	agttcctctgaatgcttcaaa	5'	New	gp1	....(((((((((..((..((((((((((..((..(((((((((...(((.((((((((....)))).)))).)))..))))...)))))..))..))))))))))..))...)))))))))	118	34.4	-49.6	1.2	3.5	29	22.5	14	4.5	26.5	4.10465	27.2213	25.6811	14.237	4.58596	25.6598	middle
74	125	mtr-MIR395a-p5	AGTTCCTTTGAACGCTTCATG	21	chr5.4	-	28596260	28596393	tttttgttgattgtctcttagAGTTCCTTTGAACGCTTCATGcatgagaatatctatttgatctaaaatccattagaaaagatagttcttcttaaaTGAAGTGTTTGGGGGAACTCTtgggttcaaccaacacc	2	mtr-MIR395a,mtr-MIR395d,	mtr-MIR395a	tttttgttgattgtttcttagagttcctttgaacgcttcatgcatgagaatatgtatttggtctaatatccattagaaaagatagttcttcatcaATGAAGTGTTTGGGGGAACTCttgggttcaaccagcacca	mtr-MIR395a-p5	agttcctttgaacgcttcatg	5'	New	gp1	....(((((.(((.(((..(((((((((..(((((((((((...((((((...((((((..(((((......)))))..))))))...)))))).)))))))))))..))))))))).)))..))).)))))..	128	35.1	-53.7	1.1	0	8.5	4	0	4	2.25	0	7.97867	4.56554	0	4.07641	2.17866	middle
74	126	mtr-miR395a_L-1R+1	TGAAGTGTTTGGGGGAACTCT	21	chr5.4	-	28596260	28596393	tttttgttgattgtctcttagAGTTCCTTTGAACGCTTCATGcatgagaatatctatttgatctaaaatccattagaaaagatagttcttcttaaaTGAAGTGTTTGGGGGAACTCTtgggttcaaccaacacc	2	mtr-MIR395a,mtr-MIR395d,	mtr-MIR395d	gagttcctttgaacgcttcatgcatgagaatatctatttggtctaaaatccattagaaaaatagttcttcttaaATGAAGTGTTTGGGGGAACTC	mtr-miR395a	ATGAAGTGTTTGGGGGAACTC	3'	Diff	gp1	....(((((.(((.(((..(((((((((..(((((((((((...((((((...((((((..(((((......)))))..))))))...)))))).)))))))))))..))))))))).)))..))).)))))..	128	35.1	-53.7	1.1	29	130.5	111.167	37	51.5	48	34.0099	122.496	126.884	37.6264	52.4838	46.478	middle
75	127	mtr-miR396b-5p	TTCCACAGCTTTCTTGAACTG	21	chr8.2	+	13293030	13293124	tattcTTCCACAGCTTTCTTGAACTGcatccagatcgagttcctttgcattgtcatggccattgttttgcgGTTCAATAAAGCTGTGGGAAGata	1	mtr-MIR396b,	mtr-MIR396b	tattcTTCCACAGCTTTCTTGAACTGcatccaaattgagttcctttgcattgccatggccattgttttgcgGTTCAATAAAGCTGTGGGAAGata	mtr-miR396b-5p	TTCCACAGCTTTCTTGAACTG	5'	Yes	gp1	(((..((((((((((((.((((((((((.(((((.(((((......)).))))).))).........)))))))))).))))))))))))..)))	95	42.1	-37	0.9	12488.5	10933.5	12487	13538	12686.5	6553	14646	10262.9	14252.5	13767.2	12928.8	6345.22	high
75	128	mtr-miR396b-3p	GTTCAATAAAGCTGTGGGAAG	21	chr8.2	+	13293030	13293124	tattcTTCCACAGCTTTCTTGAACTGcatccagatcgagttcctttgcattgtcatggccattgttttgcgGTTCAATAAAGCTGTGGGAAGata	1	mtr-MIR396b,	mtr-MIR396b	tattcTTCCACAGCTTTCTTGAACTGcatccaaattgagttcctttgcattgccatggccattgttttgcgGTTCAATAAAGCTGTGGGAAGata	mtr-miR396b-3p	GTTCAATAAAGCTGTGGGAAG	3'	Yes	gp1	(((..((((((((((((.((((((((((.(((((.(((((......)).))))).))).........)))))))))).))))))))))))..)))	95	42.1	-37	0.9	8848	6287	6471	7249	10371	7084	10376.5	5901.4	7385.9	7371.73	10569.1	6859.38	high
76	129	mtr-miR396a-5p	TTCCACAGCTTTCTTGAACTT	21	chr8.2	-	13303138	13303230	tgcttTTCCACAGCTTTCTTGAACTTctttcgtatcttaaatctgttttcaagattaaaagccctagaaGCTCAAGAAAGCTGTGGGAGAata	1	mtr-MIR396a,	mtr-MIR396a	tgcttTTCCACAGCTTTCTTGAACTTctttcgtatcttaaatctgttttcaagattaaaagtcctagaaGCTCAAGAAAGCTGTGGGAGAata	mtr-miR396a-5p	TTCCACAGCTTTCTTGAACTT	5'	Yes	gp1	...(((((((((((((((((((.(((((...((...((.(((((.......))))).)).))...))))).)))))))))))))))))))...	87	36.6	-38.2	1.1	19926.5	24195.5	16896	16676	16942.5	13240	23368.9	22711.5	19284.8	16958.3	17266.1	12820.2	high
76	130	mtr-miR396a-3p	GCTCAAGAAAGCTGTGGGAGA	21	chr8.2	-	13303138	13303230	tgcttTTCCACAGCTTTCTTGAACTTctttcgtatcttaaatctgttttcaagattaaaagccctagaaGCTCAAGAAAGCTGTGGGAGAata	1	mtr-MIR396a,	mtr-MIR396a	tgcttTTCCACAGCTTTCTTGAACTTctttcgtatcttaaatctgttttcaagattaaaagtcctagaaGCTCAAGAAAGCTGTGGGAGAata	mtr-miR396a-3p	GCTCAAGAAAGCTGTGGGAGA	3'	Yes	gp1	...(((((((((((((((((((.(((((...((...((.(((((.......))))).)).))...))))).)))))))))))))))))))...	87	36.6	-38.2	1.1	8038	7411	5094	10207	14313	12418	9426.62	6956.46	5814.21	10379.8	14586.4	12024.3	high
77	131	mtr-MIR396c-p5	TTCCACGGCTTTCTTGAACTG	21	chr1.1	+	8478248	8478373	tttatggatggtcttcttagtggttTTCCACGGCTTTCTTGAACTGtattgcatgatttctcaatgcaacataatttcaattagcacaattcaagaaggtcgtggaaaatcactatgatgatctgg	1	mtr-MIR396c,	mtr-MIR396c	tttatggatggtcttcttagtggttttccacggctttcttgaactgtattgcatggtttctcaatgcaacataatttcaattagcgcaATTCAAGAAGGTCGTGGAAAAtcactgtgatgatctggttcttttt	mtr-MIR396c-p5	ttccacggctttcttgaactg	5'	New	gp1	.........((((.((.((((((((((((((((((((((((((.(((.((((((((....)).))))))..((((....))))..))).)))))))))))))))))))))))))).)).))))...	114	36.5	-52.4	1.1	58	80	37	66	89	93	68.0199	75.0934	42.2312	67.1174	90.7001	90.0512	middle
78	132	mtr-MIR398c-p5	GGGCCGACCCGAGACCACATG	21	chr7.2	+	84043687	84043773	ttccacaGGGCCGACCTGAGACCACATGaaactatcatgtgtgtctaagctacccatctcaTGTGTTCTCAGGTCGCCCCTGctgaa	1	mtr-MIR398c,	mtr-MIR398c	ttccacagggccgacccgagaccacatgaagttatcatatgtgtctaagctacacatctcgTGTGTTCTCAGGTCGCCCCTGctgaa	mtr-MIR398c-p5	gggccgacccgagaccacatg	5'	New	gp1	...(((((((.((((((((((.(((((((.........((........))........))))))).)))))))))).))))).))..	82	51.7	-38.8	0.9	32	36	11	6	21	16	37.5282	33.792	12.5552	6.10158	21.4011	15.4927	middle
78	133	mtr-miR398b	TGTGTTCTCAGGTCGCCCCTG	21	chr7.2	+	84043687	84043773	ttccacaGGGCCGACCTGAGACCACATGaaactatcatgtgtgtctaagctacccatctcaTGTGTTCTCAGGTCGCCCCTGctgaa	1	mtr-MIR398c,	mtr-MIR398c	ttccacagggccgacccgagaccacatgaagttatcatatgtgtctaagctacacatctcgTGTGTTCTCAGGTCGCCCCTGctgaa	mtr-miR398b	TGTGTTCTCAGGTCGCCCCTG	3'	Yes	gp1	...(((((((.((((((((((.(((((((.........((........))........))))))).)))))))))).))))).))..	82	51.7	-38.8	0.9	68	35.5	6	14	36	35.5	79.7474	33.3227	6.84831	14.237	36.6877	34.3744	middle
79	134	mtr-MIR398b-p5_1ss5CT	GGGTTGACATGAGACCACATG	21	chr5.2	+	75738620	75738706	ttctacaGGGTCGACATGAGACCACATGaagctatcatatgtgtccaagttatccaactcaTGTGTTCTCAGGTCGCCCCTGttgaa	1	mtr-MIR398b,	mtr-MIR398b	ttctacagggtcgacatgagaccacatgaagctatcatatttgtctatgttatccaactcaTGTGTTCTCAGGTCGCCCCTGctgaa	mtr-MIR398b-p5	gggtcgacatgagaccacatg	5'	New	gp1	(((.((((((.((((.(((((.(((((((((((..((....))....)))).......))))))).))))).)))).)))))).)))	87	46	-33.8	0.8	5	0	0	0	0	0	5.86378	0	0	0	0	0	low
79	135	mtr-miR398b	TGTGTTCTCAGGTCGCCCCTG	21	chr5.2	+	75738620	75738706	ttctacaGGGTCGACATGAGACCACATGaagctatcatatgtgtccaagttatccaactcaTGTGTTCTCAGGTCGCCCCTGttgaa	1	mtr-MIR398b,	mtr-MIR398b	ttctacagggtcgacatgagaccacatgaagctatcatatttgtctatgttatccaactcaTGTGTTCTCAGGTCGCCCCTGctgaa	mtr-miR398b	TGTGTTCTCAGGTCGCCCCTG	3'	Yes	gp1	(((.((((((.((((.(((((.(((((((((((..((....))....)))).......))))))).))))).)))).)))))).)))	87	46	-33.8	0.8	68	35.5	6	14	36	35.5	79.7474	33.3227	6.84831	14.237	36.6877	34.3744	middle
80	136	mtr-MIR399l-p5	GGGCACCTCTCTCCTGGCAAG	21	chr6.1	-	52222556	52222634	aacaataGGGCACCTCTCTCCTAGCAAGtaaaaagagctcagcgccaataactTGCCAAAGGAGAGTTGCCCTGtggct	2	mtr-MIR399l,mtr-MIR399p,	mtr-MIR399l	aacaatagggcacctctctcctggcaagtaaaaagggctcagtgccaataactTGCCAAAGGAGAGTTGCCCTGtggct	mtr-MIR399l-p5	gggcacctctctcctggcaag	5'	New	gp1	....((((((((...(((((((.((((((.......((...)).......))))))...))))))).))))))))....	71	49.4	-30.7	0.8	0	6	5	0	12	0	0	5.632	5.70692	0	12.2292	0	middle
80	137	mtr-miR399l	TGCCAAAGGAGAGTTGCCCTG	21	chr6.1	-	52222556	52222634	aacaataGGGCACCTCTCTCCTAGCAAGtaaaaagagctcagcgccaataactTGCCAAAGGAGAGTTGCCCTGtggct	2	mtr-MIR399l,mtr-MIR399p,	mtr-MIR399l	aacaatagggcacctctctcctggcaagtaaaaagggctcagtgccaataactTGCCAAAGGAGAGTTGCCCTGtggct	mtr-miR399l	TGCCAAAGGAGAGTTGCCCTG	3'	Yes	gp1	....((((((((...(((((((.((((((.......((...)).......))))))...))))))).))))))))....	71	49.4	-30.7	0.8	20	48.5	21	16	100	60.5	23.4551	45.5254	23.9691	16.2709	101.91	58.5817	middle
81	138	mtr-miR399k	TGCCAAAGAAGATTTGCCCTG	21	chr4.3	+	13581191	13581283	aatgataggggaaatctcttttggcagagaggagtagctagagagctgaacacgcatgcttctagttTGCCAAAGAAGATTTGCCCTGtcatt	1	mtr-MIR399k,	mtr-MIR399k	aatgataggggaaatctcttttggcagagaggagtagctagagagcttgaacatgcttgcttctagttTGCCAAAGAAGATTTGCCCTGccatt	mtr-miR399k	TGCCAAAGAAGATTTGCCCTG	3'	Yes	gp1	((((((((((.((((((..(((((((((.(((((((((...............)).)))))))..)))))))))..)))))).))))))))))	93	44.1	-43.6	1.1	1.25	0	0	1.5	15.75	9.75	1.46595	0	0	1.5254	16.0509	9.44085	middle
82	139	mtr-MIR399d-p5	GGGCATGTCTCTATTGGCAGG	21	chr6.1	+	52204948	52205073	agtaagcaaatcagtcataGGGCATGTCTCTATTGGCAAGtgatatggtgatatttcatttgacttggaggctctagaaattcactTGCCAAAGGAGAGCTGCCCTGtgagtgtttagcttaaaca	2	mtr-MIR399d,mtr-MIR399b,	mtr-MIR399d	taaagtaagcaaatcagtcatagggcatgtctctattggcaggtgatatggtgatatttcatttgactttaaggctctaaaaattcactTGCCAAAGGAGAGCTGCCCTAcgagtgtttagcttaaaca	mtr-MIR399d-p5	gggcatgtctctattggcagg	5'	New	gp1	..(((((.((.((.((((((((((..((((..(((((((((((..(((.....(((((.......)))))...))).....)))))))))))..))))..)))))))))).)).)).)))))....	120	41.3	-54.4	1	0	0	0	0	38.3333	1.66667	0	0	0	0	39.0656	1.61382	middle
82	140	mtr-miR399d_1ss21AG	TGCCAAAGGAGAGCTGCCCTG	21	chr6.1	+	52204948	52205073	agtaagcaaatcagtcataGGGCATGTCTCTATTGGCAAGtgatatggtgatatttcatttgacttggaggctctagaaattcactTGCCAAAGGAGAGCTGCCCTGtgagtgtttagcttaaaca	2	mtr-MIR399d,mtr-MIR399b,	mtr-MIR399d	taaagtaagcaaatcagtcatagggcatgtctctattggcaggtgatatggtgatatttcatttgactttaaggctctaaaaattcactTGCCAAAGGAGAGCTGCCCTAcgagtgtttagcttaaaca	mtr-miR399d	TGCCAAAGGAGAGCTGCCCTA	3'	Diff	gp1	..(((((.((.((.((((((((((..((((..(((((((((((..(((.....(((((.......)))))...))).....)))))))))))..))))..)))))))))).)).)).)))))....	120	41.3	-54.4	1	5.5	19	0	0	61	44.5	6.45016	17.8347	0	0	62.1652	43.089	middle
83	141	mtr-MIR399n-p5	GGGCATGTCTCTATTGGCAGG	21	chr6.3	+	56967920	56968013	agtcataGGGCATGTCTCTATTGGCAGGtgatatggtgatatttcatttgactttaaggctctagaaattcacTTGCCAAAGGAGAGCTGCCCT	1	mtr-MIR399n,	mtr-MIR399n	agtcatagggcatgtctctattggcaggtgatatggtgatatttcatttgactttaaggctctagaaattcactTGCCAAAGGAGAGCTGCCCTAcgagt	mtr-MIR399n-p5	gggcatgtctctattggcagg	5'	New	gp1	......((((((..((((..(((((((((((....((((....))))..((((....)).)).......)))))))))))..))))..))))))	88	42.6	-35.5	0.9	0	0	0	0	38.3333	1.66667	0	0	0	0	39.0656	1.61382	middle
83	142	mtr-miR399d_L+1R-1	TTGCCAAAGGAGAGCTGCCCT	21	chr6.3	+	56967920	56968013	agtcataGGGCATGTCTCTATTGGCAGGtgatatggtgatatttcatttgactttaaggctctagaaattcacTTGCCAAAGGAGAGCTGCCCT	1	mtr-MIR399n,	mtr-MIR399n	agtcatagggcatgtctctattggcaggtgatatggtgatatttcatttgactttaaggctctagaaattcactTGCCAAAGGAGAGCTGCCCTAcgagt	mtr-miR399d	TGCCAAAGGAGAGCTGCCCTA	3'	Diff	gp1	......((((((..((((..(((((((((((....((((....))))..((((....)).)).......)))))))))))..))))..))))))	88	42.6	-35.5	0.9	0	0	0	0	7	0	0	0	0	0	7.13371	0	low
84	143	mtr-MIR399o-p5	GGGCATGTCTCTATTGGCAGG	21	chr6.1	+	52223502	52223593	agtcataGGGCATGTCTCTATTGGCAGGtgatatttcatttgacttagaggctctagaaattcactTGCCAAAGGAGAGCTGCCCTGtgagt	1	mtr-MIR399o,	mtr-MIR399o	agtcatagggcatgtctctattggcaggtgatatttcatttgacttagaggctctagaaattcactTGCCAAAGGAGAGCTGCCCTGcgagt	mtr-MIR399o-p5	gggcatgtctctattggcagg	5'	New	gp1	..((((((((((..((((..(((((((((((.(((((....((((....)).))..))))))))))))))))..))))..))))))))))..	88	44.6	-44.8	1.1	0	0	0	0	38.3333	1.66667	0	0	0	0	39.0656	1.61382	middle
84	144	mtr-miR399b	TGCCAAAGGAGAGCTGCCCTG	21	chr6.1	+	52223502	52223593	agtcataGGGCATGTCTCTATTGGCAGGtgatatttcatttgacttagaggctctagaaattcactTGCCAAAGGAGAGCTGCCCTGtgagt	1	mtr-MIR399o,	mtr-MIR399o	agtcatagggcatgtctctattggcaggtgatatttcatttgacttagaggctctagaaattcactTGCCAAAGGAGAGCTGCCCTGcgagt	mtr-miR399b	TGCCAAAGGAGAGCTGCCCTG	3'	Yes	gp1	..((((((((((..((((..(((((((((((.(((((....((((....)).))..))))))))))))))))..))))..))))))))))..	88	44.6	-44.8	1.1	5.5	19	0	0	61	44.5	6.45016	17.8347	0	0	62.1652	43.089	middle
85	145	gma-miR399a	TGCCAAAGGAGAGTTGCCCTG	21	chr1.1	+	73214454	73214543	cagctatagggcttctctttcttggcaggaaattatcatgaccattccatcatgtgtctTGCCAAAGGAGAGTTGCCCTGttgctgcttt	3	gma-MIR399c,gma-MIR399a,vun-MIR399a,	gma-MIR399a	aaaacagctatagggcttctctttattggcaggaaattatcatgaccacttcatcagatatctTGCCAAAGGAGAGTTGCCCTGttgctacttt	gma-miR399a	TGCCAAAGGAGAGTTGCCCTG	3'	Yes	gp1	((((.(((((((..(((((..(((((((((......(((((........)))))..)))))))))..)))))..))))))).))))....	86	45.6	-44.8	1.1	20	48.5	21	16	100	60.5	23.4551	45.5254	23.9691	16.2709	101.91	58.5817	middle
86	146	mtr-MIR399q-p5	GGGCATATCTCCTTTGGCAGG	21	chr1.1	+	73221902	73222066	gtaagcaaatcattcaaaGGGCATATCTCCTTTGGCAGGtataatgtggctgctagtttattttacatctatattaaaattttatgtttatcaaataaaaaataaaaaaactatcacggtaaacaactTGCCAAAGGAGAGCTGCTCTTtgagtgtttagcttag	1	mtr-MIR399q,	mtr-MIR399q	gtaagcaaatcattcaaagggcatatctcctttggcaggtataatgggtggttgctagtttattttacatctatattaaaattttatgtgtttatttatcaaataaaaaataaaaaaaactatcatggtaaacaactTGCCAAAGGAGAGCTGCTCTTtgagtgtttagcttag	mtr-MIR399q-p5	gggcatatctcctttggcagg	5'	New	gp1	.(((((.((.(((((((((((((..(((((((((((((((.((((((((.((.(((......))))).))))))))........((((((((.........................)))))))))))))))))))))))..))))))))))))).)).))))).	163	31.5	-61.9	1.2	0	0	0	0	33	6	0	0	0	0	33.6304	5.80976	middle
86	147	mtr-miR399q	TGCCAAAGGAGAGCTGCTCTT	21	chr1.1	+	73221902	73222066	gtaagcaaatcattcaaaGGGCATATCTCCTTTGGCAGGtataatgtggctgctagtttattttacatctatattaaaattttatgtttatcaaataaaaaataaaaaaactatcacggtaaacaactTGCCAAAGGAGAGCTGCTCTTtgagtgtttagcttag	1	mtr-MIR399q,	mtr-MIR399q	gtaagcaaatcattcaaagggcatatctcctttggcaggtataatgggtggttgctagtttattttacatctatattaaaattttatgtgtttatttatcaaataaaaaataaaaaaaactatcatggtaaacaactTGCCAAAGGAGAGCTGCTCTTtgagtgtttagcttag	mtr-miR399q	TGCCAAAGGAGAGCTGCTCTT	3'	Yes	gp1	.(((((.((.(((((((((((((..(((((((((((((((.((((((((.((.(((......))))).))))))))........((((((((.........................)))))))))))))))))))))))..))))))))))))).)).))))).	163	31.5	-61.9	1.2	11	19	6	11	101	42	12.9003	17.8347	6.84831	11.1862	102.929	40.6683	middle
87	148	mtr-miR399r_1ss20CA	TGCCAAAGAAGATTTGCCCAG	21	chr4.1	+	13440721	13440821	gtgcattactgggcaatgacttttttggcagtagatcacttgatcattcagatgatgcaaacaagctcacTGCCAAAGAAGATTTGCCCCGcaattcactc	1	mtr-MIR399r,	mtr-MIR399r	gtgcattactgggcaatgactttttttggcagtagttcacttgatctttcagatgatgcaaacaaactcacTGCCAAAGAAGATTTGCCCCGcaattcactc	mtr-miR399r	TGCCAAAGAAGATTTGCCCCG	3'	Diff	gp1	(((.(((...((((((...(((((((((((((..((((..(((....)))..))))((......))..)))))))))))))..))))))...))).)))..	99	43.6	-37.1	0.8	1.25	0	0	1.5	6.75	1.75	1.46595	0	0	1.5254	6.87894	1.69451	low
88	149	mtr-MIR399c-p5	GGGAAAATCTCTTTTGGCAGA	21	chr5.4	+	71489634	71489748	gttctgctgttgaggaatgataGGGAAAATCTCTTTTGGCAGAgaggagtaaaaatcttaaacaggaatgtttcagcttTGCCAAAGGAGATTTGCCCTGccatttttgacagct	1	mtr-MIR399c,	mtr-MIR399c	gttctgctgttgaggaatgatagggaaaatctcttttggcagagaggagtaaaaatcttaaacaggaatgtttctggttTGCCAAAGGAGATTTGCCCTGccatttttgacagctattg	mtr-MIR399c-p5	gggaaaatctcttttggcaga	5'	New	gp1	.....(((((..(.(((((..((((.((((((((((((((((((..(((......((((....))))....)))..)))))))))))))))))).))))..))))))..))))).	109	40.9	-51.9	1.1	0	0	0	0	12	0	0	0	0	0	12.2292	0	middle
88	150	mtr-miR399c	TGCCAAAGGAGATTTGCCCTG	21	chr5.4	+	71489634	71489748	gttctgctgttgaggaatgataGGGAAAATCTCTTTTGGCAGAgaggagtaaaaatcttaaacaggaatgtttcagcttTGCCAAAGGAGATTTGCCCTGccatttttgacagct	1	mtr-MIR399c,	mtr-MIR399c	gttctgctgttgaggaatgatagggaaaatctcttttggcagagaggagtaaaaatcttaaacaggaatgtttctggttTGCCAAAGGAGATTTGCCCTGccatttttgacagctattg	mtr-miR399c	TGCCAAAGGAGATTTGCCCTG	3'	Yes	gp1	.....(((((..(.(((((..((((.((((((((((((((((((..(((......((((....))))....)))..)))))))))))))))))).))))..))))))..))))).	109	40.9	-51.9	1.1	3.5	6	0	3	13	3.5	4.10465	5.632	0	3.05079	13.2483	3.38902	middle
89	151	mtr-miR399a_1ss9GA	TGCCAAAGAAGATTTGCCCAG	21	chr4.4	+	13471600	13471733	tccaagttgcagttgaattacagggtgagttctccattggcaggtagctagtcactatatgatatccattgcaatcatctcttagtgtgcaatcTGCCAAAGGAGATTTGCCCAGcgattctcctgcaactcta	5	mtr-MIR399a,mtr-MIR399e,mtr-MIR399s,mtr-MIR399t,mtr-MIR399f,	mtr-MIR399f	ttacaGGGTGAGTTCTCCATTGGCAGGtagctagtcactatatgatatgcattgcaattcatctcttagtgtgcaatcTGCCAAAGGAGATTTGCCCAGcgatt	mtr-miR399a	TGCCAAAGGAGATTTGCCCAG	3'	Diff	gp1	....((((((((..(((((...(((..((.(((((.(((((((((.((....(((((.(((((..........)))))....))))).)).))))))))).)))))))..)))...)))))..))))))))...	127	44	-55.3	0.9	1.25	0	0	1.5	6.75	1.75	1.46595	0	0	1.5254	6.87894	1.69451	low
90	152	mtr-miR399a_1ss9GA	TGCCAAAGAAGATTTGCCCAG	21	chr4.3	-	13593901	13594004	ttacagggcatgttctcctttggcaggcagccataagctatgatatgcattgcaaccatactctttgagtgtgcaatcTGCCAAAGGAGATTTGCCCAGcaatt	1	mtr-MIR399g,	mtr-MIR399g	ttacagggcatgttctcctttggcaggtagccatatgctatgatatgcattgcaaccatactctttgagtgtgtaaccTGCCAAAGGAGATTTGCCCAGcaatt	mtr-miR399a	TGCCAAAGGAGATTTGCCCAG	3'	Diff	gp1	.....(((((...((((((((((((((.........((.(((.....))).))...(((((((...)))))))...))))))))))))))..))))).......	92	45.2	-44.7	1	1.25	0	0	1.5	6.75	1.75	1.46595	0	0	1.5254	6.87894	1.69451	low
91	153	mtr-MIR399h-p5	GAGCAAATCTCTATTGGCAGA	21	chr4.3	+	13587116	13587215	ttgaggaatgataGAGCAAATCTCTATTGGCAGAgcgaagtagaaagctcggacatgcatgcttctggttTGCCAAAGGAGATTTGCCCTGccatttttt	4	mtr-MIR399h,mtr-MIR399i,gma-MIR399j,gma-MIR399k,	mtr-MIR399h	aatgatagagcaaatctctattggcagaacgaagtagaaagcttggacatgcatgcttctggttTGCCAAAGGAGATTTGCCCTGccatt	mtr-MIR399h-p5	gagcaaatctctattggcaga	5'	New	gp1	..((..((((..((.(((((((((..((((((((.(((((((....((........)).)))))).).))))))))..))))))))).))..))))..))	98	44	-41.1	0.9	0	0	0	0	6	0	0	0	0	0	6.11461	0	low
91	154	mtr-miR399c	TGCCAAAGGAGATTTGCCCTG	21	chr4.3	+	13587116	13587215	ttgaggaatgataGAGCAAATCTCTATTGGCAGAgcgaagtagaaagctcggacatgcatgcttctggttTGCCAAAGGAGATTTGCCCTGccatttttt	4	mtr-MIR399h,mtr-MIR399i,gma-MIR399j,gma-MIR399k,	mtr-MIR399i	aatgatagagcaaatctctattagcagaacgaagtagaaagcttggacatgcatgcttctggttTGCCAAAGGAGATTTGCCCTGccatt	mtr-miR399c	TGCCAAAGGAGATTTGCCCTG	3'	Yes	gp1	..((..((((..((.(((((((((..((((((((.(((((((....((........)).)))))).).))))))))..))))))))).))..))))..))	98	44	-41.1	0.9	3.5	6	0	3	13	3.5	4.10465	5.632	0	3.05079	13.2483	3.38902	middle
92	155	mtr-miR408-5p	ACAGGGAACATGCAGAGCATG	21	chr1.1	+	64053491	64053615	tagttaatgacaggacaaagACAGGGAACATGCAGAGCATGgatggaactatcgacagagaaggaaactgccgtggctccactcATGCACTGCCTCTTCCCTGGCttataatctgtttttattat	1	mtr-MIR408,	mtr-MIR408	tagttaatgacaggacaaagACAGGGAACATGCAGAGCATGgatgaaactatcgacagtgaaggaaactgttgtggctccactcATGCACTGCCTCTTCCCTGGCttataatctgtttttattat	mtr-miR408-5p	ACAGGGAACATGCAGAGCATG	5'	Yes	gp1	((((....((((((...(((.(((((((...((((.(((((..((((.(((.((.(((.........))).))))).))))..))))).))))...))))))).)))....))))))...)))).	124	44.8	-45.7	0.8	122	31	30	19	66	29	143.076	29.0987	34.2415	19.3217	67.2607	28.0805	middle
92	156	mtr-miR408-3p	ATGCACTGCCTCTTCCCTGGC	21	chr1.1	+	64053491	64053615	tagttaatgacaggacaaagACAGGGAACATGCAGAGCATGgatggaactatcgacagagaaggaaactgccgtggctccactcATGCACTGCCTCTTCCCTGGCttataatctgtttttattat	1	mtr-MIR408,	mtr-MIR408	tagttaatgacaggacaaagACAGGGAACATGCAGAGCATGgatgaaactatcgacagtgaaggaaactgttgtggctccactcATGCACTGCCTCTTCCCTGGCttataatctgtttttattat	mtr-miR408-3p	ATGCACTGCCTCTTCCCTGGC	3'	Yes	gp1	((((....((((((...(((.(((((((...((((.(((((..((((.(((.((.(((.........))).))))).))))..))))).))))...))))))).)))....))))))...)))).	124	44.8	-45.7	0.8	606	261	106	160	385	331	710.69	244.992	120.987	162.709	392.354	320.505	middle
93	157	mtr-miR482-5p_L+2R-2	TAGGCATGGGATAGTAGGGAA	21	chr1.2	-	81076007	81076110	ggggaaggcaTAGGCATGGGATAGTAGGGAAgaagtgataacagcatatgctcatcatggtgcttcttcTTACCTACACCTCCCATGCCTAcgttttccctcta	1	mtr-MIR482,	mtr-MIR482	ggggaaggcataGGCATGGGATAGTAGGGAAGAagtgataacagcatatgcttattatggtgcttcttCTTACCTACACCTCCCATGCCtacgttttccctcta	mtr-miR482-5p	GGCATGGGATAGTAGGGAAGA	5'	Diff	gp1	((((((..(.(((((((((((..((((((((((((((((...(((....))).))).....))))))))...)))))...))))))))))).)..))))))...	101	48.1	-50	1	533	560	591	483	638	890	625.079	525.654	674.558	491.178	650.187	861.78	high
93	158	mtr-miR482-3p_L-1R+2	TTACCTACACCTCCCATGCCTA	22	chr1.2	-	81076007	81076110	ggggaaggcaTAGGCATGGGATAGTAGGGAAgaagtgataacagcatatgctcatcatggtgcttcttcTTACCTACACCTCCCATGCCTAcgttttccctcta	1	mtr-MIR482,	mtr-MIR482	ggggaaggcataGGCATGGGATAGTAGGGAAGAagtgataacagcatatgcttattatggtgcttcttCTTACCTACACCTCCCATGCCtacgttttccctcta	mtr-miR482-3p	CTTACCTACACCTCCCATGCC	3'	Diff	gp1	((((((..(.(((((((((((..((((((((((((((((...(((....))).))).....))))))))...)))))...))))))))))).)..))))))...	101	48.1	-50	1	3821	6245	3828	5846	5552	11817	4481.1	5861.98	4369.22	5944.98	5658.05	11442.3	high
94	159	mtr-miR1507-5p_R-1_2ss15CT18AG	AGAGTTGTATGGAATGAGAGA	21	chr8.1	-	2335357	2335486	ttaatgtggtgttgagtAGAGTTGTATGGAATGAGAGAtgggaatttcttgttgaattctattcattcaattttccctcCCTCGTTCCATACATCATCTAGccaatactgtgttaacaattgtctttggt	1	mtr-MIR1507,	mtr-MIR1507	accataaactccaattaatgtggtgttgagtAGAGTTGTATGGAACGAAAGATgggaatttcttgttgaattctattcattcaattttccctcCCTCGTTCCATACATCATCTAGccaatactgtgttaacaattgtctttggt	mtr-miR1507-5p	AGAGTTGTATGGAACGAAAGAT	5'	Diff	gp1	(((((..(((((((..((((..(((((((((((((.((.(((((....(((.(((((...)))))..)))..))))))).)))))))))))))...))))..)))))))..)))))..............	116	36.2	-47.9	1	1297	1043	1731	755	707	1160	1521.07	979.03	1975.74	767.783	720.505	1123.22	high
94	160	mtr-miR1507-3p	CCTCGTTCCATACATCATCTAG	22	chr8.1	-	2335357	2335486	ttaatgtggtgttgagtAGAGTTGTATGGAATGAGAGAtgggaatttcttgttgaattctattcattcaattttccctcCCTCGTTCCATACATCATCTAGccaatactgtgttaacaattgtctttggt	1	mtr-MIR1507,	mtr-MIR1507	accataaactccaattaatgtggtgttgagtAGAGTTGTATGGAACGAAAGATgggaatttcttgttgaattctattcattcaattttccctcCCTCGTTCCATACATCATCTAGccaatactgtgttaacaattgtctttggt	mtr-miR1507-3p	CCTCGTTCCATACATCATCTAG	3'	Yes	gp1	(((((..(((((((..((((..(((((((((((((.((.(((((....(((.(((((...)))))..)))..))))))).)))))))))))))...))))..)))))))..)))))..............	116	36.2	-47.9	1	2094	3289	2150	2357	2337	3015	2455.75	3087.28	2453.98	2396.91	2381.64	2919.4	high
95	161	mtr-miR1509b	TTAATCTAGGAAATTACACTCG	22	chr3.1	+	58542635	58542752	ttgatccattgcattcttTTAATCTAGGAAATTACACTCGagtgaccatgagatgaggatcatctttctctctttctctctagtgtatttccttgattaaagaaattcgttggatcat	1	mtr-MIR1509b,	mtr-MIR1509b	ttgatccattgcattcttTTAATCTAGGAAATTACACTCGagtgaccatgagatgaggatattatctctctctctctctagtgtatttccttgattaaagaaattcattggatcat	mtr-miR1509b	TTAATCTAGGAAATTACACTCG	5'	Yes	gp1	.(((((((..(.(((..(((((((.(((((((.(((((.(((.((....((((.(((((......))))))))))).))).)))))))))))).)))))))..))).)..))))))).	116	34.7	-43.9	1.1	933	1237	1073	757	864	971	1094.18	1161.13	1224.71	769.817	880.504	940.212	high
96	162	gma-MIR1511-p5_1ss6AG	GTGGTGTCAGGTCCTGCTTCA	21	chr8.3	-	37073160	37073250	cGTGGTGTCAGGTCCTGCTTCAtcaagtggtcttgagttcaactcccatccaagcacatggttAACCAGGCTCTGATACCAtgatgatata	1	gma-MIR1511,	gma-MIR1511	tcagccgtggtatcaggtcctgcttcatcaagtggtcttgtgttcaaatccagcctcaagcacatggttAACCAGGCTCTGATACCATGgtgaatataa	gma-MIR1511-p5	gtggtatcaggtcctgcttca	5'	New	gp1	(((((((((((..((((.((.((((.(((..((((...............))))))).)))).)).))))..)))))))))))........	83	47.3	-31.7	0.7	0	31	26	0	31	0	0	29.0987	29.676	0	31.5922	0	middle
96	163	gma-miR1511_R-2	AACCAGGCTCTGATACCA	18	chr8.3	-	37073160	37073250	cGTGGTGTCAGGTCCTGCTTCAtcaagtggtcttgagttcaactcccatccaagcacatggttAACCAGGCTCTGATACCAtgatgatata	1	gma-MIR1511,	gma-MIR1511	tcagccgtggtatcaggtcctgcttcatcaagtggtcttgtgttcaaatccagcctcaagcacatggttAACCAGGCTCTGATACCATGgtgaatataa	gma-miR1511	AACCAGGCTCTGATACCATG	3'	Diff	gp1	(((((((((((..((((.((.((((.(((..((((...............))))))).)))).)).))))..)))))))))))........	83	47.3	-31.7	0.7	381	484	516	741	642	339	446.82	454.315	588.954	753.546	654.264	328.251	middle
97	164	gma-MIR1525-p5_1ss15TC	ACACTTTTTAGTCCCTGTGACATT	24	chr6.3	+	54899045	54899313	aattttagggttaattaagttttcagtctctataaatattcacagttttgtttttagtccctacaaaataaaatcACACTTTTTAGTCCATGTGACATTtttcttaagcattttagggactaaaaatgctgatggaaaaattttatagggactaaaaatgctgatggaaaattttatagggactaaaaaGTGTGATTTTATTTTGTAGAGACTaaaaataaaactgtaaatatttatagggactaaaaacttaattaaccctaaatttt	1	gma-MIR1525,	gma-MIR1525	tatataatttTGGGTTAATTAAGTTTTTAGTccctataaatattcatagttttgtttttagtccctacaaaataagatcacactttttagtccttgtgacattttccttaagcattttagggactaaaactgttgatgaaatttttttacagggactaaaagtgccgatgaaaaaatttatagggactaaaaagtatgattttattttgtaaggactaaaaacaaaactgtgaatatttataggactaaaaacttaattaatcctataattttt	gma-MIR1525-p5	acactttttagtccttgtgacatt	5'	New	gp1	...((((((((((((((((((((.((((((((((((((((.((((((((((((((((((.(((((((((((((((((((((((((((((.(((((.(((((((...((((((((((...((((((((............))))).)))...)).))))))))...))))))).))))).))))))))))))))))))))))))))))).)))))))))))))))))).)))))))))))))))).))))))))))))))))))))....	262	25.3	-134.9	2	5	34	6	19	5	33	5.86378	31.9147	6.84831	19.3217	5.09551	31.9537	middle
97	165	gma-MIR1525-p3_2ss3AG19AG	GTGTGATTTTATTTTGTAGGGACT	24	chr6.3	+	54899045	54899313	aattttagggttaattaagttttcagtctctataaatattcacagttttgtttttagtccctacaaaataaaatcACACTTTTTAGTCCATGTGACATTtttcttaagcattttagggactaaaaatgctgatggaaaaattttatagggactaaaaatgctgatggaaaattttatagggactaaaaaGTGTGATTTTATTTTGTAGAGACTaaaaataaaactgtaaatatttatagggactaaaaacttaattaaccctaaatttt	1	gma-MIR1525,	gma-MIR1525	tatataatttTGGGTTAATTAAGTTTTTAGTccctataaatattcatagttttgtttttagtccctacaaaataagatcacactttttagtccttgtgacattttccttaagcattttagggactaaaactgttgatgaaatttttttacagggactaaaagtgccgatgaaaaaatttatagggactaaaaagtatgattttattttgtaaggactaaaaacaaaactgtgaatatttataggactaaaaacttaattaatcctataattttt	gma-MIR1525-p3	gtatgattttattttgtaaggact	3'	New	gp1	...((((((((((((((((((((.((((((((((((((((.((((((((((((((((((.(((((((((((((((((((((((((((((.(((((.(((((((...((((((((((...((((((((............))))).)))...)).))))))))...))))))).))))).))))))))))))))))))))))))))))).)))))))))))))))))).)))))))))))))))).))))))))))))))))))))....	262	25.3	-134.9	2	101	173	99	118	179	140	118.448	162.389	112.997	119.998	182.419	135.561	middle
98	166	mtr-MIR2086-p3_1ss19CT	AGGGACATGAATGCAGAATTGG	22	chr2.1	+	4789291	4789391	ttcaccaactttccagttctgcaatcatgtcccctgcagcttgactttaggggaaatcaagcagcaAGGGACATGAATGCAGACTTGGaaagatggtctga	1	mtr-MIR2086,	mtr-MIR2086	ttcaccaactttCCAGTTCTGCGTTCATGTCCCctgcagcttgactttaggggaaatcgagcaacaaggGACATGAATGCAGAACTGGAAagatggtctgag	mtr-MIR2086-p3	aggGACATGAATGCAGAACTGG	3'	New	gp1	...((((.(((((((..((((((.(((((((((.(((.((((((.(((....))).)))))).))).))))))))).))))))..))))))).))))....	94	46.5	-55.3	1.2	21	21	8	12	5	20	24.6279	19.712	9.13107	12.2032	5.09551	19.3659	middle
99	167	mtr-miR2111a-5p	TAATCTGCATCCTGAGGTTTA	21	chr7.2	-	42008568	42008674	agtattggttaaggatccggTAATCTGCATCCTGAGGTTTAaaacaataaatttattgtatctaGTCCTCGGGATGCTGATTACCttttccttgggaccaatgtaca	1	mtr-MIR2111o,	mtr-MIR2111o	agtattggttaaggatccggTAATCTGCATCCTGAGGTTTAaaacaataaatttattgtatctagtcctcgggatgctgattaccttttccttatgaccaatgtaca	mtr-miR2111a-5p	TAATCTGCATCCTGAGGTTTA	5'	Yes	gp1	..(((((((((((((...(((((((.(((((((((((......((((((....)))))).......))))))))))).)))))))...)))))..))))))))....	101	38.3	-48.3	1.2	1.25	7.95833	0	18.2833	9.80357	13.9167	1.46595	7.47023	0	18.5929	9.99084	13.4754	middle
99	168	mtr-MIR2111o-p3	GTCCTCGGGATGCTGATTACC	21	chr7.2	-	42008568	42008674	agtattggttaaggatccggTAATCTGCATCCTGAGGTTTAaaacaataaatttattgtatctaGTCCTCGGGATGCTGATTACCttttccttgggaccaatgtaca	1	mtr-MIR2111o,	mtr-MIR2111o	agtattggttaaggatccggTAATCTGCATCCTGAGGTTTAaaacaataaatttattgtatctagtcctcgggatgctgattaccttttccttatgaccaatgtaca	mtr-MIR2111o-p3	gtcctcgggatgctgattacc	3'	New	gp1	..(((((((((((((...(((((((.(((((((((((......((((((....)))))).......))))))))))).)))))))...)))))..))))))))....	101	38.3	-48.3	1.2	11	27	0	20	70	17	12.9003	25.344	0	20.3386	71.3371	16.461	middle
100	169	mtr-miR2111a-5p	TAATCTGCATCCTGAGGTTTA	21	chr7.3	-	41048681	41048786	atattgggattcgatgagaTAATCTGCATCCTGAGGTTTAgaacaacaaatgcgtaattgtatctaAGCCTTGGAATGCAGATTATCtcttccttatcaccaatgc	2	mtr-MIR2111b,mtr-MIR2111e,	mtr-MIR2111e	atattgggattcgattggaTAATCTGCATCCTGAGGTTTAgaacaacagatgcgtaattctatctaAGCCTTGGGATGCTGATTATCtcttccttatcaccaatgc	mtr-miR2111a-5p	TAATCTGCATCCTGAGGTTTA	5'	Yes	gp1	.(((((((((..((.((((((((((((((.(..(((((((((((((...........)))).)))))))))..).)))))))))))))).))...))).)))))).	104	37.7	-48.4	1.2	1.25	7.95833	0	18.2833	9.80357	13.9167	1.46595	7.47023	0	18.5929	9.99084	13.4754	middle
100	170	mtr-miR2111a-3p	AGCCTTGGAATGCAGATTATC	21	chr7.3	-	41048681	41048786	atattgggattcgatgagaTAATCTGCATCCTGAGGTTTAgaacaacaaatgcgtaattgtatctaAGCCTTGGAATGCAGATTATCtcttccttatcaccaatgc	2	mtr-MIR2111b,mtr-MIR2111e,	mtr-MIR2111b	atattgggatttgatgggaTAATCTGCATCCTGAGGTTTAgaacaacaaatgcgtaattatatctaAGCCTTGGAATGCAGATTATCtcttccttatcaccaatgc	mtr-miR2111a-3p	AGCCTTGGAATGCAGATTATC	3'	Yes	gp1	.(((((((((..((.((((((((((((((.(..(((((((((((((...........)))).)))))))))..).)))))))))))))).))...))).)))))).	104	37.7	-48.4	1.2	20.5	30.5	3	30	103	39	24.0415	28.6293	3.42415	30.5079	104.968	37.7634	middle
101	171	mtr-miR2111a-5p	TAATCTGCATCCTGAGGTTTA	21	chr7.2	-	42142266	42142370	atattgggtaaggattagaTAATCTGCATCCTGAGGTTTAtagcaatattttagttgtctttaatccttggaatgcagattatcctttccttattgccaatgcaa	2	mtr-MIR2111d,mtr-MIR2111h,	mtr-MIR2111h	attattgggtaaggattagaTAATCTGCATCCTGAGGTTTAtagcaatattgtagttgtttttaatccttggaatgcaaattatcctttccttattgccaatgcaa	mtr-miR2111a-5p	TAATCTGCATCCTGAGGTTTA	5'	Yes	gp1	.(((((((((((((...((((((((((((.(..(((.(((.((((((......)))).)).))).)))..).))))))))))))...)))))))..))))))...	101	33.3	-43.3	1.2	1.25	7.95833	0	18.2833	9.80357	13.9167	1.46595	7.47023	0	18.5929	9.99084	13.4754	middle
102	172	mtr-miR2111a-5p	TAATCTGCATCCTGAGGTTTA	21	chr7.1	+	37475374	37475479	atattgggtttggatgagaTAATCTGCATCCTGAGGTTTAgaataacaactgcgtaattgtatctaAGCCTTGGAGTGCAGATTATCtcttccttaacaccaatgg	1	mtr-MIR2111i,	mtr-MIR2111i	atattgagtttggataggaTAATCTGCATCCTGAGGTTTAgaataacagctgcgtaattgtatctaagccttggagtgcagattatctcttccttaacaccaatgg	mtr-miR2111a-5p	TAATCTGCATCCTGAGGTTTA	5'	Yes	gp1	.(((((((((.(((.(((((((((((((..(..(((((((((...((((........)))).)))))))))..)..))))))))))))).)))..))).)))))).	104	38.7	-52.2	1.3	1.25	7.95833	0	18.2833	9.80357	13.9167	1.46595	7.47023	0	18.5929	9.99084	13.4754	middle
102	173	mtr-MIR2111i-p3	AGCCTTGGAGTGCAGATTATC	21	chr7.1	+	37475374	37475479	atattgggtttggatgagaTAATCTGCATCCTGAGGTTTAgaataacaactgcgtaattgtatctaAGCCTTGGAGTGCAGATTATCtcttccttaacaccaatgg	1	mtr-MIR2111i,	mtr-MIR2111i	atattgagtttggataggaTAATCTGCATCCTGAGGTTTAgaataacagctgcgtaattgtatctaagccttggagtgcagattatctcttccttaacaccaatgg	mtr-MIR2111i-p3	agccttggagtgcagattatc	3'	New	gp1	.(((((((((.(((.(((((((((((((..(..(((((((((...((((........)))).)))))))))..)..))))))))))))).)))..))).)))))).	104	38.7	-52.2	1.3	4	17.5	3	29.5	147	33	4.69103	16.4267	3.42415	29.9995	149.808	31.9537	middle
103	174	mtr-miR2111a-5p_L-2R+2	ATCTGCATCCTGAGGTTTAGA	21	chr7.2	-	42290168	42290271	attgggatcagatgagatATCTGCATCCTAAGGTTTAGAacaatcgatgcgtaactgtatctaagccttggaatgcagattatctcttccttatcaccaatgca	1	mtr-MIR2111c,	mtr-MIR2111c	agattgggatcagatgagaTAATCTGCATCCTGAGGTTTAgaacaatcgatgcgtaactgtatctaagccttagaatgcagattatctcttccttatcaccaatgca	mtr-miR2111a-5p	TAATCTGCATCCTGAGGTTTA	5'	Diff	gp1	((((((((.((..(((((((((((((.(((((((((((((((.............))).)))))))))))).)))))))).)))))...)).))).)))))...	101	39.4	-42.4	1	0	2.33333	0	1.33333	2.5	1.25	0	2.19022	0	1.35591	2.54776	1.21037	low
104	175	mtr-miR2111a-5p	TAATCTGCATCCTGAGGTTTA	21	chr7.1	+	37487653	37487784	attggttgaggatagggTAATCTGCATCCTGAGGTTTAgaacaatagttgcttaatttccttaaaaagaaaatagtcgtgtaattgtttctaAGCCTTGGAGTGCAGATTATCttttccttatcaccaatgc	2	mtr-MIR2111f,mtr-MIR2111n,	mtr-MIR2111n	tatattgggtgaggatgggaTAATCTGCATCCTGAGGTTTAaaacaatagttacgtaattacccctaaaaaaattagttacataatcgtttctaagccttggagtgcagattatcttttccttatcacctatgc	mtr-miR2111a-5p	TAATCTGCATCCTGAGGTTTA	5'	Yes	gp1	((((((((((((.(((((((((((((..(..((((((((((..(((((((((((.((((........)))).)))....))))))))))))))))))..)..))))))))))))).))))))..))))))..	130	35.6	-56.5	1.2	1.25	7.95833	0	18.2833	9.80357	13.9167	1.46595	7.47023	0	18.5929	9.99084	13.4754	middle
104	176	mtr-MIR2111f-p3	AGCCTTGGAGTGCAGATTATC	21	chr7.1	+	37487653	37487784	attggttgaggatagggTAATCTGCATCCTGAGGTTTAgaacaatagttgcttaatttccttaaaaagaaaatagtcgtgtaattgtttctaAGCCTTGGAGTGCAGATTATCttttccttatcaccaatgc	2	mtr-MIR2111f,mtr-MIR2111n,	mtr-MIR2111f	taaggatagggTAATCTGCATCCTGAGGTTTAgaacaatagttggttaatttccttaaaaagaaaatagtcgcgtaattgtttctaagccttggagtgcagattatcttttcctta	mtr-MIR2111f-p3	agccttggagtgcagattatc	3'	New	gp1	((((((((((((.(((((((((((((..(..((((((((((..(((((((((((.((((........)))).)))....))))))))))))))))))..)..))))))))))))).))))))..))))))..	130	35.6	-56.5	1.2	4	17.5	3	29.5	147	33	4.69103	16.4267	3.42415	29.9995	149.808	31.9537	middle
105	177	mtr-miR2111a-5p	TAATCTGCATCCTGAGGTTTA	21	chr7.1	-	37470487	37470616	attggttgaggatagggTAATCTGCATCCTGAGGTTTAtaacaatacttgcgtaatttcagaaaaataaataaattgcgtaatcgtttctaAGCCTCGGAGTGCGGATTATCttttcctatcaccaatgc	1	mtr-MIR2111g,	mtr-MIR2111g	atattgggtgaggatgggaTAATCTGCATCCTGAGGTTTAagacaatatttgcgtaatttccaaaaaataaataaattgcgtaatcgtttctaAGCCTCGGAGTGCGGATTATCttttcctatcaccaatgc	mtr-miR2111a-5p	TAATCTGCATCCTGAGGTTTA	5'	Yes	gp1	((((((..((((.(((((((((((((..((((((((((.(((.....(((((((((((.............)))))))))))..)))..))))))))))..))))))))))))).))))...))))))..	128	36.9	-53.8	1.1	1.25	7.95833	0	18.2833	9.80357	13.9167	1.46595	7.47023	0	18.5929	9.99084	13.4754	middle
105	178	mtr-miR2111g-3p	AGCCTCGGAGTGCGGATTATC	21	chr7.1	-	37470487	37470616	attggttgaggatagggTAATCTGCATCCTGAGGTTTAtaacaatacttgcgtaatttcagaaaaataaataaattgcgtaatcgtttctaAGCCTCGGAGTGCGGATTATCttttcctatcaccaatgc	1	mtr-MIR2111g,	mtr-MIR2111g	atattgggtgaggatgggaTAATCTGCATCCTGAGGTTTAagacaatatttgcgtaatttccaaaaaataaataaattgcgtaatcgtttctaAGCCTCGGAGTGCGGATTATCttttcctatcaccaatgc	mtr-miR2111g-3p	AGCCTCGGAGTGCGGATTATC	3'	Yes	gp1	((((((..((((.(((((((((((((..((((((((((.(((.....(((((((((((.............)))))))))))..)))..))))))))))..))))))))))))).))))...))))))..	128	36.9	-53.8	1.1	6	12	0	23	76	27	7.03654	11.264	0	23.3894	77.4518	26.1439	middle
106	179	mtr-miR2111l	ATCCTTGGAATGCAGATTATC	21	chr7.2	-	42277672	42277757	taagaaataggtaatctccatcatgaggttcagagtaatattttagtttcctataATCGTTGGAATGCAGATTATCatttccttat	1	mtr-MIR2111l,	mtr-MIR2111l	ataagaaataggtaatctccatcatgaggtttagagtaatattttagttacctctaATCCTTGGAATGCAGATTATCatttccttat	mtr-miR2111l	ATCCTTGGAATGCAGATTATC	3'	Yes	gp1	...(((((.((((((((.((((....((((.(((.(((....))).))).....))))....).))).))))))))))))).....	78	30.2	-14.3	0.5	31	17	7	53	78	37	36.3554	15.9573	7.98969	53.8973	79.49	35.8268	middle
107	180	mtr-miR2111a-5p_L-2R+2	ATCTGCATCCTGAGGTTTAGA	21	chr7.3	-	41067021	41067127	tatattgggatcagatgagatATCTGCATCCTGAGGTTTAGAacaaccgatgcgtaactgtatctaAGCCTTGGAATGCAGATTATCtcttccttatcaccaatgca	1	mtr-MIR2111a,	mtr-MIR2111a	tatattgggatcagatgagaTAATCTGCATCCTGAGGTTTAgaacaaccgatgcgtcactgtgtctaAGCCTTGGAATGCAGATTATCtcttccttatcaccaatgca	mtr-miR2111a-5p	TAATCTGCATCCTGAGGTTTA	5'	Diff	gp1	..(((((((((.((..(((((((((((((.(..((((((((((((.............))).)))))))))..).)))))))).)))))...)).))).))))))..	103	40.2	-42.8	1	0	2.33333	0	1.33333	2.5	1.25	0	2.19022	0	1.35591	2.54776	1.21037	low
107	181	mtr-miR2111a-3p	AGCCTTGGAATGCAGATTATC	21	chr7.3	-	41067021	41067127	tatattgggatcagatgagatATCTGCATCCTGAGGTTTAGAacaaccgatgcgtaactgtatctaAGCCTTGGAATGCAGATTATCtcttccttatcaccaatgca	1	mtr-MIR2111a,	mtr-MIR2111a	tatattgggatcagatgagaTAATCTGCATCCTGAGGTTTAgaacaaccgatgcgtcactgtgtctaAGCCTTGGAATGCAGATTATCtcttccttatcaccaatgca	mtr-miR2111a-3p	AGCCTTGGAATGCAGATTATC	3'	Yes	gp1	..(((((((((.((..(((((((((((((.(..((((((((((((.............))).)))))))))..).)))))))).)))))...)).))).))))))..	103	40.2	-42.8	1	20.5	30.5	3	30	103	39	24.0415	28.6293	3.42415	30.5079	104.968	37.7634	middle
108	182	mtr-miR2111a-5p	TAATCTGCATCCTGAGGTTTA	21	chr7.1	+	37494652	37494758	ttaattggttgaggatagggTAATCTGCATCCTGAGGTTTAgagcaacatttgtgttgtatctaGTCCTTGGGATGCAGATTACCtttttcttaataccaatgtgaa	2	mtr-MIR2111m,mdm-MIR2111a,	mtr-MIR2111m	ttaattggttaaggatagggTAATCTGCATCCTGAGGTTTAgagcaacatttgtgttgtatctaGTCCTCGGGATACAGATTACTtttttcttaataccaatgtgaa	mtr-miR2111a-5p	TAATCTGCATCCTGAGGTTTA	5'	Yes	gp1	...((((((((((((.((((((((((((((((..(((..((((((((((....)))))).))))..)))..)))))))))))))))).))))))..)))))).....	99	37.4	-57.3	1.4	1.25	7.95833	0	18.2833	9.80357	13.9167	1.46595	7.47023	0	18.5929	9.99084	13.4754	middle
108	183	mdm-MIR2111a-p3	GTCCTTGGGATGCAGATTACC	21	chr7.1	+	37494652	37494758	ttaattggttgaggatagggTAATCTGCATCCTGAGGTTTAgagcaacatttgtgttgtatctaGTCCTTGGGATGCAGATTACCtttttcttaataccaatgtgaa	2	mtr-MIR2111m,mdm-MIR2111a,	mdm-MIR2111a	ggttaggattgggTAATCTGCATCCTGAGGTTTAgatcagcacacacgtatttgttgtatctagtccttgggatgcagattaccttgtccttgcc	mdm-MIR2111a-p3	gtccttgggatgcagattacc	3'	New	gp1	...((((((((((((.((((((((((((((((..(((..((((((((((....)))))).))))..)))..)))))))))))))))).))))))..)))))).....	99	37.4	-57.3	1.4	0	0	0	0	11	0	0	0	0	0	11.2101	0	middle
109	184	mtr-miR2111a-5p	TAATCTGCATCCTGAGGTTTA	21	chr7.1	+	37482346	37482448	ttattgggtaaggattagaTAATCTGCATTCTGAGGTTTAtagcaatattttagctatctttaATCCTTGGAATGCAGATTATCctttccttattgccaatgc	1	mtr-MIR2111j,	mtr-MIR2111j	ttattgggtaaggattagaTAATCTGCATCCTGAGGTTTAtaacaatattttagctgtctttaaccttagaatgcagattatcctttccttattgccaatgc	mtr-miR2111a-5p	TAATCTGCATCCTGAGGTTTA	5'	Yes	gp1	.(((((((((((((...((((((((((((((..(((.(((((((.........))))....))).)))..))))))))))))))...)))))))..)))))).	101	33	-45.4	1.3	1.25	7.95833	0	18.2833	9.80357	13.9167	1.46595	7.47023	0	18.5929	9.99084	13.4754	middle
109	185	mtr-MIR2111j-p3_1ss7AG	AACCTTGGAATGCAGATTATC	21	chr7.1	+	37482346	37482448	ttattgggtaaggattagaTAATCTGCATTCTGAGGTTTAtagcaatattttagctatctttaATCCTTGGAATGCAGATTATCctttccttattgccaatgc	1	mtr-MIR2111j,	mtr-MIR2111j	ttattgggtaaggattagaTAATCTGCATCCTGAGGTTTAtaacaatattttagctgtctttaaccttagaatgcagattatcctttccttattgccaatgc	mtr-MIR2111j-p3	aaccttagaatgcagattatc	3'	New	gp1	.(((((((((((((...((((((((((((((..(((.(((((((.........))))....))).)))..))))))))))))))...)))))))..)))))).	101	33	-45.4	1.3	0	0	0	2	0	0	0	0	0	2.03386	0	0	low
110	186	mtr-MIR2118-p5	GGATATGGGAGGATCGGTAAAA	22	chr1.2	-	81078790	81078947	agagagagaaagggaaagggtgaaagagcttgaggaagttatgGGATATGGGAGGATCGGTAAAAcagatctaattcatctgatctgaataatttctTTACCGATTCCACCCATTCCTAttatttccttttgttcctctctttccactctcctctcca	1	mtr-MIR2118,	mtr-MIR2118	agagagagaaagggaaagggtgaaagagcttgaggaagttatgggatatgggaggatcggtaaaacagatctaattcatctgaattgaataatttctTTACCGATTCCACCCATTCCTAttatttccttttgttcctctctttccactctcctctccat	mtr-MIR2118-p5	ggatatgggaggatcggtaaaa	5'	New	gp1	.(((((.((.((((((((((.....((((..((((((((.((((((.(((((.(((((((((((.((((((..........)))))).........))))))))).)).))))))))))).))))))))..))))..)))))))).)).)))))))..	155	40.5	-69.6	1.1	830	747	1077	1080	1192	1165	973.388	701.184	1229.27	1098.29	1214.77	1128.06	high
110	187	mtr-miR2118	TTACCGATTCCACCCATTCCTA	22	chr1.2	-	81078790	81078947	agagagagaaagggaaagggtgaaagagcttgaggaagttatgGGATATGGGAGGATCGGTAAAAcagatctaattcatctgatctgaataatttctTTACCGATTCCACCCATTCCTAttatttccttttgttcctctctttccactctcctctcca	1	mtr-MIR2118,	mtr-MIR2118	agagagagaaagggaaagggtgaaagagcttgaggaagttatgggatatgggaggatcggtaaaacagatctaattcatctgaattgaataatttctTTACCGATTCCACCCATTCCTAttatttccttttgttcctctctttccactctcctctccat	mtr-miR2118	TTACCGATTCCACCCATTCCTA	3'	Yes	gp1	.(((((.((.((((((((((.....((((..((((((((.((((((.(((((.(((((((((((.((((((..........)))))).........))))))))).)).))))))))))).))))))))..))))..)))))))).)).)))))))..	155	40.5	-69.6	1.1	13969	20276	21566	26948	13959	27014	16382.2	19032.4	24615.1	27404.2	14225.6	26157.5	high
111	188	mtr-MIR2119-p5	TTGATTGGAAATAAAGAGAGA	21	chr5.3	-	31084670	31084799	tttattttttttacactaagatactccctactttcctTTGATTGGAAATAAAGAGAGAcaaaaaggtaaatttaatttctcttgttatgtcaaTCAAAGGGAGGTGTGGAGTAGaggtgtaaaaagtaaa	1	mtr-MIR2119,	mtr-MIR2119	tttattttttttacactaagatactccctactttcctttgattggaaataaagagagacaaaaaggtaaatttaatttctcttcttatgtcaaTCAAAGGGAGGTGTGGAGTAGaggtgtaaaaagtaaa	mtr-MIR2119-p5	ttgattggaaataaagagaga	5'	New	gp1	......(((((((((((....((((((..((((((((((((((((.....((((((((...(((......)))..))))))))......))))))))))))))))..))))))..)))))))))))....	120	30	-49.2	1.3	0	0	0	0	10	0	0	0	0	0	10.191	0	middle
111	189	mtr-miR2119	TCAAAGGGAGGTGTGGAGTAG	21	chr5.3	-	31084670	31084799	tttattttttttacactaagatactccctactttcctTTGATTGGAAATAAAGAGAGAcaaaaaggtaaatttaatttctcttgttatgtcaaTCAAAGGGAGGTGTGGAGTAGaggtgtaaaaagtaaa	1	mtr-MIR2119,	mtr-MIR2119	tttattttttttacactaagatactccctactttcctttgattggaaataaagagagacaaaaaggtaaatttaatttctcttcttatgtcaaTCAAAGGGAGGTGTGGAGTAGaggtgtaaaaagtaaa	mtr-miR2119	TCAAAGGGAGGTGTGGAGTAG	3'	Yes	gp1	......(((((((((((....((((((..((((((((((((((((.....((((((((...(((......)))..))))))))......))))))))))))))))..))))))..)))))))))))....	120	30	-49.2	1.3	31	0	0	198	143	8	36.3554	0	0	201.352	145.732	7.74634	middle
112	190	mtr-MIR2586a-p5	AGCACGGATACGGACACGGACACC	24	chr7.1	-	36566166	36566364	acaacctatgaAGCACGGATACGGTCACGGACACCggacacgacacggacactgacacgccgacacagctaataatttgaaaaaatcacataattcagtgtAATTACAAGTGTCGGTGTCGTGTCggtgtccgacacgacacgtgtccgacaccgggacacgcctaatccgaggagtgtccgtgcttcatagatcacaa	1	mtr-MIR2586a,	mtr-MIR2586a	atgacaacctatgaagcacggatacggacacggacaccggacacgacacagacacgccgacacaactaataatttgaaaatatcacattatctggtgtaattacaagtgtcggtgtcatgtcggtatcggacacgacacgtgtccgacactgggacacgcctaatcCGAGGAGTGTCCGTGCTTCATagatgacaa	mtr-MIR2586a-p5	agcacggatacggacacggacacc	5'	New	gp1	.....(((((((((((((((((.(((.(((((((((.(((((((((.((((((.........((((....(((.((.(((.....))).)).)))..)))).......)))))).))))))))))))))))))....))).(((((((.......)))))))(((......))).))))))))))))))))).......	117	50.8	-93.2	0.9	99	189	126	174	109	259	116.103	177.408	143.814	176.946	111.082	250.788	middle
112	191	mtr-MIR2586a-p3_1ss20AG	AATTACAAGTGTCGGTGTCGTGTC	24	chr7.1	-	36566166	36566364	acaacctatgaAGCACGGATACGGTCACGGACACCggacacgacacggacactgacacgccgacacagctaataatttgaaaaaatcacataattcagtgtAATTACAAGTGTCGGTGTCGTGTCggtgtccgacacgacacgtgtccgacaccgggacacgcctaatccgaggagtgtccgtgcttcatagatcacaa	1	mtr-MIR2586a,	mtr-MIR2586a	atgacaacctatgaagcacggatacggacacggacaccggacacgacacagacacgccgacacaactaataatttgaaaatatcacattatctggtgtaattacaagtgtcggtgtcatgtcggtatcggacacgacacgtgtccgacactgggacacgcctaatcCGAGGAGTGTCCGTGCTTCATagatgacaa	mtr-MIR2586a-p3	aattacaagtgtcggtgtcatgtc	3'	New	gp1	.....(((((((((((((((((.(((.(((((((((.(((((((((.((((((.........((((....(((.((.(((.....))).)).)))..)))).......)))))).))))))))))))))))))....))).(((((((.......)))))))(((......))).))))))))))))))))).......	117	50.8	-93.2	0.9	44	208	75	190	152	266	51.6013	195.243	85.6038	193.217	154.904	257.566	middle
113	192	mtr-miR2587a_1ss11AC	TTGACCGTTCCTATGAACCCTG	22	chr8.4	+	76692688	76692792	cgatggtgtcatggtcattgTTGACCGTTCATATGAACCCTGcaattgcattgcaacTTGTGTGGGGTTCATATAACGGTCaacagagacccttgacatcaaaga	2	mtr-MIR2587a,mtr-MIR2587c,	mtr-MIR2587a	cgatggtgtcatggtcattgTTGACCGTTCATATGAACCCTGcaattgcaatgcattttaacttgtgtggggttcatataacggtcaatagagacccttgacataaaaga	mtr-miR2587a	TTGACCGTTCATATGAACCCTG	5'	Diff	gp1	...((((((((.((((..(((((((((((.((((((((((..((.((((...))))....))..)))))))))))))))))))))..))))..))))))))....	98	44.8	-56.7	1.2	13.8	18.2	13.8	18	10.65	20.1333	16.184	17.0837	15.7511	18.3048	10.8534	19.495	middle
113	193	mtr-MIR2587a-p3	TTGTGTGGGGTTCATATAACGGTC	24	chr8.4	+	76692688	76692792	cgatggtgtcatggtcattgTTGACCGTTCATATGAACCCTGcaattgcattgcaacTTGTGTGGGGTTCATATAACGGTCaacagagacccttgacatcaaaga	2	mtr-MIR2587a,mtr-MIR2587c,	mtr-MIR2587a	cgatggtgtcatggtcattgTTGACCGTTCATATGAACCCTGcaattgcaatgcattttaacttgtgtggggttcatataacggtcaatagagacccttgacataaaaga	mtr-MIR2587a-p3	ttgtgtggggttcatataacggtc	3'	New	gp1	...((((((((.((((..(((((((((((.((((((((((..((.((((...))))....))..)))))))))))))))))))))..))))..))))))))....	98	44.8	-56.7	1.2	4.73333	11.0667	7	11.0667	11.8667	10.8	5.55105	10.3879	7.98969	11.254	12.0933	10.4576	middle
114	194	mtr-miR2587a_1ss11AC	TTGACCGTTCCTATGAACCCTG	22	chr3.2	+	81559775	81559879	cggtggtgtcatggtcattgTTGACCGTTCATATGAACCCTGcaatagcatttcagcttgtgtggggttcatataacggtcAACAGAGACCATTGACATCAAAGA	2	mtr-MIR2587e,mtr-MIR2587g,	mtr-MIR2587e	cggtggtgtcatggtcattgTTGACCGTTCATATGAACCCTGcaatagcattgcagcttgtgtggggttcatataacggtcaacagagaccattgacatcaaaga	mtr-miR2587a	TTGACCGTTCATATGAACCCTG	5'	Diff	gp1	...(((((((((((((..(((((((((((.((((((((((..((..(((......)))..))..)))))))))))))))))))))..)))))).)))))))....	98	44.8	-61.3	1.3	13.8	18.2	13.8	18	10.65	20.1333	16.184	17.0837	15.7511	18.3048	10.8534	19.495	middle
114	195	mtr-MIR2587e-p3_1ss11AC	AACAGAGACCCTTGACATCAAAGA	24	chr3.2	+	81559775	81559879	cggtggtgtcatggtcattgTTGACCGTTCATATGAACCCTGcaatagcatttcagcttgtgtggggttcatataacggtcAACAGAGACCATTGACATCAAAGA	2	mtr-MIR2587e,mtr-MIR2587g,	mtr-MIR2587e	cggtggtgtcatggtcattgTTGACCGTTCATATGAACCCTGcaatagcattgcagcttgtgtggggttcatataacggtcaacagagaccattgacatcaaaga	mtr-MIR2587e-p3	aacagagaccattgacatcaaaga	3'	New	gp1	...(((((((((((((..(((((((((((.((((((((((..((..(((......)))..))..)))))))))))))))))))))..)))))).)))))))....	98	44.8	-61.3	1.3	38.9	87.7333	59.8333	52.7333	58.3667	58.9667	45.6202	82.3524	68.2928	53.6261	59.4816	57.097	middle
115	196	mtr-miR2587a_1ss11AC	TTGACCGTTCCTATGAACCCTG	22	chr1.1	+	2847733	2847837	cggtggtgtcatggtcattgTTGACCGTTCATATGAACCCTGcaatagcatttcagcttgtgtggggttcatataacggtcAACAGAGACCCTTGACATCAAAGA	1	mtr-MIR2587f,	mtr-MIR2587f	cggtggtgtcatggtcattgTTGACCGTTCATATGAACCCTGcaatagcattgcagcttgtgtggggttcatataacggtcaacagagactcttgacatcaaaga	mtr-miR2587a	TTGACCGTTCATATGAACCCTG	5'	Diff	gp1	...((((((((.((((..(((((((((((.((((((((((..((..(((......)))..))..)))))))))))))))))))))..))))..))))))))....	98	45.7	-59.8	1.2	13.8	18.2	13.8	18	10.65	20.1333	16.184	17.0837	15.7511	18.3048	10.8534	19.495	middle
115	197	mtr-MIR2587f-p3_1ss10TC	AACAGAGACCCTTGACATCAAAGA	24	chr1.1	+	2847733	2847837	cggtggtgtcatggtcattgTTGACCGTTCATATGAACCCTGcaatagcatttcagcttgtgtggggttcatataacggtcAACAGAGACCCTTGACATCAAAGA	1	mtr-MIR2587f,	mtr-MIR2587f	cggtggtgtcatggtcattgTTGACCGTTCATATGAACCCTGcaatagcattgcagcttgtgtggggttcatataacggtcaacagagactcttgacatcaaaga	mtr-MIR2587f-p3	aacagagactcttgacatcaaaga	3'	New	gp1	...((((((((.((((..(((((((((((.((((((((((..((..(((......)))..))..)))))))))))))))))))))..))))..))))))))....	98	45.7	-59.8	1.2	38.9	87.7333	59.8333	52.7333	58.3667	58.9667	45.6202	82.3524	68.2928	53.6261	59.4816	57.097	middle
116	198	mtr-miR2587a_1ss11AC	TTGACCGTTCCTATGAACCCTG	22	chr5.1	-	827535	827631	ggtgtcatggtcattgTTGACCGTTCATATGAACCCTGcaattgcattgcaacTTGTGTGGGGTTCATATAACGGTCaacagagacctttgacatca	1	mtr-MIR2587b,	mtr-MIR2587b	aggtgtcatggtcattgTTGACCGTTCATATGAACCCTGcaataacattgcaacttgtgtggggttcatataacggtcaactgagacctttgacatca	mtr-miR2587a	TTGACCGTTCATATGAACCCTG	5'	Diff	gp1	(((((((.((((..(((((((((((.((((((((((..((.((((...))))....))..)))))))))))))))))))))..))))..))))))).	96	44.3	-56.1	1.3	13.8	18.2	13.8	18	10.65	20.1333	16.184	17.0837	15.7511	18.3048	10.8534	19.495	middle
116	199	mtr-MIR2587b-p3	TTGTGTGGGGTTCATATAACGGTC	24	chr5.1	-	827535	827631	ggtgtcatggtcattgTTGACCGTTCATATGAACCCTGcaattgcattgcaacTTGTGTGGGGTTCATATAACGGTCaacagagacctttgacatca	1	mtr-MIR2587b,	mtr-MIR2587b	aggtgtcatggtcattgTTGACCGTTCATATGAACCCTGcaataacattgcaacttgtgtggggttcatataacggtcaactgagacctttgacatca	mtr-MIR2587b-p3	ttgtgtggggttcatataacggtc	3'	New	gp1	(((((((.((((..(((((((((((.((((((((((..((.((((...))))....))..)))))))))))))))))))))..))))..))))))).	96	44.3	-56.1	1.3	4.73333	11.0667	7	11.0667	11.8667	10.8	5.55105	10.3879	7.98969	11.254	12.0933	10.4576	middle
117	200	mtr-miR2587a_1ss11AC	TTGACCGTTCCTATGAACCCTG	22	chr2.1	-	19135060	19135172	gtggtgtcatggtcattgTTGACCGTTCATATGAACCCTGcaattgcATTGCAGCTTGTGTGGGGTTCATAtaacggtcaacagagacccttgacatcaaaggaagacacaaa	1	mtr-MIR2587d,	mtr-MIR2587d	ttgtggtgtcatggtcattgTTGACCGTTCATATGAACCCTGcaatagcattgcagcttgtgtggggttcatataacggtcaacatagaccattgacataaaaagtagacacaaa	mtr-miR2587a	TTGACCGTTCATATGAACCCTG	5'	Diff	gp1	.((((((((.((((..(((((((((((.((((((((((..((...((......))...))..)))))))))))))))))))))..))))..))))))))..............	98	45.1	-59.3	1.2	13.8	18.2	13.8	18	10.65	20.1333	16.184	17.0837	15.7511	18.3048	10.8534	19.495	middle
117	201	mtr-MIR2587d-p3_1ss4GT	ATTTCAGCTTGTGTGGGGTTCATA	24	chr2.1	-	19135060	19135172	gtggtgtcatggtcattgTTGACCGTTCATATGAACCCTGcaattgcATTGCAGCTTGTGTGGGGTTCATAtaacggtcaacagagacccttgacatcaaaggaagacacaaa	1	mtr-MIR2587d,	mtr-MIR2587d	ttgtggtgtcatggtcattgTTGACCGTTCATATGAACCCTGcaatagcattgcagcttgtgtggggttcatataacggtcaacatagaccattgacataaaaagtagacacaaa	mtr-MIR2587d-p3	attgcagcttgtgtggggttcata	3'	New	gp1	.((((((((.((((..(((((((((((.((((((((((..((...((......))...))..)))))))))))))))))))))..))))..))))))))..............	98	45.1	-59.3	1.2	7.06667	21.0667	7.33333	8.06667	12.2	15.4667	8.28748	19.7746	8.37015	8.20324	12.433	14.9763	middle
118	202	mtr-miR2590h_L-2R+2	AATGACATGGCAGAATAATCACCC	24	chr3.2	-	56397175	56397372	aaaatttcaagAATGACATGGCAGAATAATCACCCttagattttattaagaaattattccgaaattaatgttagccaataaaatctcaacctggccggaaatcatggggtggtgggtgttatgtattttttttttatgaaaggttaatAAATAAGACTGAAATCTAAGGGTGattattctgccatgtcattcttgaat	3	mtr-MIR2590c,mtr-MIR2590a,mtr-MIR2590f,	mtr-MIR2590a	aaaattttaAGAATGACATGGCAGAATAATCACccttagattttatcaagaaatagtcttgaaattaatgttagccaataaaatctcagccgaaaatcatagggtggtgggtgttatgtattttttttttatgaaagattaataaatgagactgaaATCTAAAGGTGATTATTGTGCCatgtcattcttgaatattt	mtr-miR2590h	AGAATGACATGGCAGAATAATCAC	5'	Diff	gp1	.....((((((((((((((((((((((((((((((((((((((((.(((....)))............((((((((.((((...((((.((...(((.......)))...))))))..)))).....((((......))))))))))))........)))))))))))))))))))))))))))))))))))))))).	192	31.3	-81.2	1.3	303.833	474	346.333	337.833	359.5	485.833	356.322	444.928	395.299	343.553	366.367	470.429	middle
118	203	mtr-MIR2590c-p3_2ss5GA20AG	AAATAAGACTGAAATCTAAGGGTG	24	chr3.2	-	56397175	56397372	aaaatttcaagAATGACATGGCAGAATAATCACCCttagattttattaagaaattattccgaaattaatgttagccaataaaatctcaacctggccggaaatcatggggtggtgggtgttatgtattttttttttatgaaaggttaatAAATAAGACTGAAATCTAAGGGTGattattctgccatgtcattcttgaat	3	mtr-MIR2590c,mtr-MIR2590a,mtr-MIR2590f,	mtr-MIR2590c	aaaattttaAGAATGACATGGCAGAATAATCACccttaaattttatcaataaatagtcttgaaattaatgttagccaataaaatctcagtctagccggaaatcatggggtggtgggtgttatgtattttttatttatgaaagattaataaatgagactgaaATCTAAAGGTGATTATTGTGCCatttcattcttgaatattt	mtr-MIR2590c-p3	aaatgagactgaaATCTAAAGGTG	3'	New	gp1	.....((((((((((((((((((((((((((((((((((((((((.(((....)))............((((((((.((((...((((.((...(((.......)))...))))))..)))).....((((......))))))))))))........)))))))))))))))))))))))))))))))))))))))).	192	31.3	-81.2	1.3	0	8	0	10.25	4	6.75	0	7.50934	0	10.4235	4.07641	6.53598	middle
119	204	mtr-miR2590h_L-2R+2	AATGACATGGCAGAATAATCACCC	24	chr6.2	+	21695017	21695217	aaatatttaagAATGACATGGCAGAATAATCACCCttagattttatcaagaaattgtcccgaaattaatgttagccaataaaatctcagcctggccggaaatcatggggtggtgggtgttatgtattttctttttatgaaaggttaatAAATAAGACTGAAATCTAAGGGTGattattctaccatgtcattcttgaatctt	1	mtr-MIR2590h,	mtr-MIR2590h	aaattttaAGAATGACATGGCAGAATAATCACccttaaattttatcaagaaatagtcatgaaattaatgttaaccaataaaatctcagccttgctgaaaatcatagggtggtgggtgttatgtattttttttttatgaaagattaatAAATGAGACTGAAATCTAAAGGTGattattgtaccatgtcattcttgaatctt	mtr-miR2590h	AGAATGACATGGCAGAATAATCAC	5'	Diff	gp1	....(((((((((((((((((.((((((((((((((((((((((........((..(((((..(((..((...((((..............))))))..)))..)))))..)).(((.((((.((((..(((((....)))))..)))).)))).))))))))))))))))))))))))).)))))))))))))))))...	194	32.8	-78.6	1.2	303.833	474	346.333	337.833	359.5	485.833	356.322	444.928	395.299	343.553	366.367	470.429	middle
119	205	mtr-miR2590g_2ss5GA20AG	AAATAAGACTGAAATCTAAGGGTG	24	chr6.2	+	21695017	21695217	aaatatttaagAATGACATGGCAGAATAATCACCCttagattttatcaagaaattgtcccgaaattaatgttagccaataaaatctcagcctggccggaaatcatggggtggtgggtgttatgtattttctttttatgaaaggttaatAAATAAGACTGAAATCTAAGGGTGattattctaccatgtcattcttgaatctt	1	mtr-MIR2590h,	mtr-MIR2590h	aaattttaAGAATGACATGGCAGAATAATCACccttaaattttatcaagaaatagtcatgaaattaatgttaaccaataaaatctcagccttgctgaaaatcatagggtggtgggtgttatgtattttttttttatgaaagattaatAAATGAGACTGAAATCTAAAGGTGattattgtaccatgtcattcttgaatctt	mtr-miR2590g	AAATGAGACTGAAATCTAAAGGTG	3'	Diff	gp1	....(((((((((((((((((.((((((((((((((((((((((........((..(((((..(((..((...((((..............))))))..)))..)))))..)).(((.((((.((((..(((((....)))))..)))).)))).))))))))))))))))))))))))).)))))))))))))))))...	194	32.8	-78.6	1.2	0	8	0	10.25	4	6.75	0	7.50934	0	10.4235	4.07641	6.53598	middle
120	206	mtr-miR2590h_L-2R+2	AATGACATGGCAGAATAATCACCC	24	chr2.2	+	5493824	5494033	atcaagaaaaattcaagAATGACATGGCAGAATAATCACCCttagattttatcaagaaattgtcctgaaattaatgttaaccaataaaatctcagtctggccggaaatcatggggtggtgggtgttatgtatttttttttatgaaaggttaatAAATAAGACTGAAATCTAAGGGTGattattctgccatgtcattcttgaatctttctt	5	mtr-MIR2590j,mtr-MIR2590i,mtr-MIR2590d,mtr-MIR2590b,mtr-MIR2590e,	mtr-MIR2590e	taagaaaattttaAGAATGACATGGCAGAATAATCACccttagattttatcaagaaatagtcctgaaattaatgttagccaataaaatctcagtctggccggaaatcatgggtggtgggtgttatgtattttttttatttttatgaaagattaataaatgagattgaaATCTAAAGGTGATTATTGTGCCatgtcattcttgaatcttt	mtr-miR2590h	AGAATGACATGGCAGAATAATCAC	5'	Diff	gp1	...((((((.(((((((((((((((((((((((((((((((((((((((((.(((....)))............((((((((.............(((....)))..(((((..(.....................)..)))))..))))))))........))))))))))))))))))))))))))))))))))))))))).))))))	207	31.9	-87.1	1.3	303.833	474	346.333	337.833	359.5	485.833	356.322	444.928	395.299	343.553	366.367	470.429	middle
120	207	mtr-miR2590g_2ss5GA20AG	AAATAAGACTGAAATCTAAGGGTG	24	chr2.2	+	5493824	5494033	atcaagaaaaattcaagAATGACATGGCAGAATAATCACCCttagattttatcaagaaattgtcctgaaattaatgttaaccaataaaatctcagtctggccggaaatcatggggtggtgggtgttatgtatttttttttatgaaaggttaatAAATAAGACTGAAATCTAAGGGTGattattctgccatgtcattcttgaatctttctt	5	mtr-MIR2590j,mtr-MIR2590i,mtr-MIR2590d,mtr-MIR2590b,mtr-MIR2590e,	mtr-MIR2590i	tcaagaaaatttcaAGAATGACATGGCAGAATAATCACccttagattttatcaagaaatagtcatgaaattaatgttaaccaataaaatctcagcctggccgaaaatcatgggatggtgggtgttatgtattttttttttatgaaagattaatAAATGAGACTGAAATCTAAAGGTGattattgtaccatgtcattcttaaatttttcttat	mtr-miR2590g	AAATGAGACTGAAATCTAAAGGTG	3'	Diff	gp1	...((((((.(((((((((((((((((((((((((((((((((((((((((.(((....)))............((((((((.............(((....)))..(((((..(.....................)..)))))..))))))))........))))))))))))))))))))))))))))))))))))))))).))))))	207	31.9	-87.1	1.3	0	8	0	10.25	4	6.75	0	7.50934	0	10.4235	4.07641	6.53598	middle
121	208	mtr-miR2590g_2ss5GA20AG	AAATAAGACTGAAATCTAAGGGTG	24	chr1.1	+	74107184	74107271	ctagccggaaatcatgggatggtgggtgttatgtattttttttttatgaaaggttaatAAATAAGACTGAAATCTAAAGGTGattatt	1	mtr-MIR2590g,	mtr-MIR2590g	ctagccggaaaccatggggtggtgggtgttatgtatttttttttttatgaaaaattaatAAATGAGACTGAAATCTAAAGGTGattattgtgt	mtr-miR2590g	AAATGAGACTGAAATCTAAAGGTG	3'	Diff	gp1	.........((((((.((((....(((.((((.((((.(((((....)))))...)))).)))).)))...))))....))))))...	76	30.7	-10.7	0.4	0	8	0	10.25	4	6.75	0	7.50934	0	10.4235	4.07641	6.53598	middle
122	209	mtr-MIR2591-p5_2ss9TC20AG	AAGGTGTACCGGTACTCTTGCTTC	24	chr7.1	+	47349769	47350178	agggaacttctacggtacacccgcaaaataAAGTTGTACCGGTACTCTTACTTCaaaaatctataaattaactatcatttttatgaaataaagagccatttgttgatatttatattttagaaaatattatttcataagaaaaaaacatcatttcattgtttataaaaatcatactaatttttttacattttattgtaaaaaataatcaaaaatctctattatgagtactaaaaattcagaaaaattaaattttatttcgttgacgtttttgataaataagatttaattattatgattataggtgatagaaaacaatttttctcttcaaaaaataacacatttaactattaattcaatgatttggtgtaccaatacactcaaatcTTTGAGTGTACCATA…	1	mtr-MIR2591,	mtr-MIR2591	aagGGAACTTCTACGGTACACCTGCaaattaaggtgtatcggtactcttacttcaaaaatttataaattaactatcatttttatgaaataaaaagctatttgttgatatctatattttagaaaatatcatttcataagaaaaaaagcatcatttcattgtttataaaaatcatactaatttttttagatttattgtaaaaaataatcaaaattctctattacgagtactaaaaattcagaaaaatcaaattttatttcgtcgatgtttttgataaataagatttaattattataattataggtgatagaaaacaatttttctctttaaaaaataacacatttaactactaatttaatgatttagtgtaccaatacactcatatctttgggtgtaccata…	mtr-MIR2591-p5	aaggtgtatcggtactcttacttc	5'	New	gp1	(((.((.(((((.(((((((............(((((...(((((((...........................((((....)))).....((((...((((.((((.(((((.(((((((((......)))).)))))...(((((.........)))))))))).)))).......(((((((((......)))))))))....))))...)))).....)))))))......(((.((.(((((((((((((((.((..(.....)..))))))))))))))))).)).))).......(((.((((((....))))))..)))....)))))................((((.(((((((((((....))))).)))))).))))))))))).))…	189	22.4	-80.1	0.9	0	0	0	0	0	0	0	0	0	0	0	0	low
122	210	mtr-MIR2591-p3_1ss22TG	TTTGGGTGTACCATAGAATTTGCC	24	chr7.1	+	47349769	47350178	agggaacttctacggtacacccgcaaaataAAGTTGTACCGGTACTCTTACTTCaaaaatctataaattaactatcatttttatgaaataaagagccatttgttgatatttatattttagaaaatattatttcataagaaaaaaacatcatttcattgtttataaaaatcatactaatttttttacattttattgtaaaaaataatcaaaaatctctattatgagtactaaaaattcagaaaaattaaattttatttcgttgacgtttttgataaataagatttaattattatgattataggtgatagaaaacaatttttctcttcaaaaaataacacatttaactattaattcaatgatttggtgtaccaatacactcaaatcTTTGAGTGTACCATA…	1	mtr-MIR2591,	mtr-MIR2591	aagGGAACTTCTACGGTACACCTGCaaattaaggtgtatcggtactcttacttcaaaaatttataaattaactatcatttttatgaaataaaaagctatttgttgatatctatattttagaaaatatcatttcataagaaaaaaagcatcatttcattgtttataaaaatcatactaatttttttagatttattgtaaaaaataatcaaaattctctattacgagtactaaaaattcagaaaaatcaaattttatttcgtcgatgtttttgataaataagatttaattattataattataggtgatagaaaacaatttttctctttaaaaaataacacatttaactactaatttaatgatttagtgtaccaatacactcatatctttgggtgtaccata…	mtr-MIR2591-p3	tttgggtgtaccatagaattttcc	3'	New	gp1	(((.((.(((((.(((((((............(((((...(((((((...........................((((....)))).....((((...((((.((((.(((((.(((((((((......)))).)))))...(((((.........)))))))))).)))).......(((((((((......)))))))))....))))...)))).....)))))))......(((.((.(((((((((((((((.((..(.....)..))))))))))))))))).)).))).......(((.((((((....))))))..)))....)))))................((((.(((((((((((....))))).)))))).))))))))))).))…	189	22.4	-80.1	0.9	0	0	0	0	0	0	0	0	0	0	0	0	low
123	211	mtr-miR2592ap	AGGCTGGTTTAGATGAAGGTA	21	chr8.1	+	72821621	72822048	aaaagtctgattccgccaaaagatcgtcattagttagggtaaggtgcattccaactacaacaattgtcttacctctgtaatggggtaattcaaacttgccaaacggcgaggactcaagcatttcgcgcggcattcatgtttttcctttggaaagattaaatttttgttAGGCTGGTTTAAATGAAGGTAttaagtgtcaaggaatggacctcatttcgttggcacttgaataccatcatctaaagcaagcctaacaaaagtttattcttttcaaaggaaaacatgaatgtcgggtgAAATGCTTGAGTCCTGTTGTTtggcgagtttgaatttaccccatttcagaggtaagacaattgttgtagttggaatgcacattccaactacaacaattgtctt…	1	mtr-MIR2592be,	mtr-MIR2592be	ataaaaagtttgattccgccagaagatcgtcattagttagggtaatgtgcattccaactataactattgtcttacatctgaaattgggtaattcaaacttgccaaacgacaagtcctcaacattcgcccaacattcatgtttttcctttgaaaagattaaattcttgttAGGCTGGTTTAGATGAAGGTAttgaagtgtaaaggaatgaacctcatttcgttggcacttgaataccatcatctaaagcaagcataacaaaaatttattcttttcataggaaaaacatgaatgtcgggcgAAATGCTTGAGTCCTGTTGTTtggcgaatttgaatttacccaattcaaaggtaagacaattgttgtagttggaatgcccattccaagaacaacaattgtc…	mtr-miR2592ap	AGGCTGGTTTAGATGAAGGTA	5'	Yes	gp1	..((((.(((....(((........((...(((((.(((....((((((((((((((((((((((((((((((((((.((((((((((((((((((((((((((..(.((((((((((((((((((.(((((((((((((((.((((((((((((.((((((((((((((((((.((((.((((.(((((((((((((((((((((.....)))))).)))))))))).))))).)))).)))).).))))))))))))))))).))))))))))))))))))))))))))).)))))))))))))))))))..)))))))))))))))).)))))))))).))))))))))))))))))))))))))))))))))..))))))))..))..(..(((.…	365	38.8	-253.2	1.5	50.5833	39.5278	53.25	36.1389	114.917	102.444	59.3219	37.1034	60.7787	36.7507	117.112	99.1962	middle
123	212	mtr-miR2592a.2-3p	AAATGCTTGAGTCCTGTTGTT	21	chr8.1	+	72821621	72822048	aaaagtctgattccgccaaaagatcgtcattagttagggtaaggtgcattccaactacaacaattgtcttacctctgtaatggggtaattcaaacttgccaaacggcgaggactcaagcatttcgcgcggcattcatgtttttcctttggaaagattaaatttttgttAGGCTGGTTTAAATGAAGGTAttaagtgtcaaggaatggacctcatttcgttggcacttgaataccatcatctaaagcaagcctaacaaaagtttattcttttcaaaggaaaacatgaatgtcgggtgAAATGCTTGAGTCCTGTTGTTtggcgagtttgaatttaccccatttcagaggtaagacaattgttgtagttggaatgcacattccaactacaacaattgtctt…	1	mtr-MIR2592be,	mtr-MIR2592be	ataaaaagtttgattccgccagaagatcgtcattagttagggtaatgtgcattccaactataactattgtcttacatctgaaattgggtaattcaaacttgccaaacgacaagtcctcaacattcgcccaacattcatgtttttcctttgaaaagattaaattcttgttAGGCTGGTTTAGATGAAGGTAttgaagtgtaaaggaatgaacctcatttcgttggcacttgaataccatcatctaaagcaagcataacaaaaatttattcttttcataggaaaaacatgaatgtcgggcgAAATGCTTGAGTCCTGTTGTTtggcgaatttgaatttacccaattcaaaggtaagacaattgttgtagttggaatgcccattccaagaacaacaattgtc…	mtr-miR2592a.2-3p	AAATGCTTGAGTCCTGTTGTT	3'	Yes	gp1	..((((.(((....(((........((...(((((.(((....((((((((((((((((((((((((((((((((((.((((((((((((((((((((((((((..(.((((((((((((((((((.(((((((((((((((.((((((((((((.((((((((((((((((((.((((.((((.(((((((((((((((((((((.....)))))).)))))))))).))))).)))).)))).).))))))))))))))))).))))))))))))))))))))))))))).)))))))))))))))))))..)))))))))))))))).)))))))))).))))))))))))))))))))))))))))))))))..))))))))..))..(..(((.…	365	38.8	-253.2	1.5	6.875	8.125	8.125	4.875	6.37374	2.45455	8.0627	7.62667	9.27375	4.95754	6.49549	2.37672	middle
124	213	mtr-miR2592ap	AGGCTGGTTTAGATGAAGGTA	21	chr3.4	-	26302443	26302678	aaacttgccaaacgacgaggactcaagcatttcgctcagcattcatgtttttcctttgaaaagattaaatttttgttAGGCTGGTTTAGATGAAGGTAttaagtgtcaaggaatggacctcatttcgttgggacttgaataCCATCATCTAAAGCAAGCCTAAcaacaatttattcttttcaaaggaaaacatgaatgccaggtgaaatgcttgagtcctgttgtttggcaagttt	3	mtr-MIR2592ba,mtr-MIR2592aw,mtr-MIR2592u,	mtr-MIR2592aw	acctgccaaacaacaggactcgagcatttcgCTCGGCATTCATGTTTTTCCTTtgaaaagattaaattcttgttAGGCTGGTTTAGATGAAGGTAttaggcgtgaaggaatgaacctcatttcgttggcacttgaataccaacgtctaaagcacgcctaacaaaaatttattcttttcaaaggaaaacatgaatgccgggtgaaatgcttgagccctattgttttgcaggttt	mtr-miR2592ap	AGGCTGGTTTAGATGAAGGTA	5'	Yes	gp1	((((((((((((((((.(((((((((((((((((((..(((((((((((((.((((((((((((.((((((.(((((((((((.(((((((((.((((((((((..(((((((((.....)))))).)))..))))).))))).))))))))).).)))))))))).)))))).)))))))))))))))))))))))))..)))))))))))))))))))))))))))))))))))	236	37.3	-144.7	1.6	50.5833	39.5278	53.25	36.1389	114.917	102.444	59.3219	37.1034	60.7787	36.7507	117.112	99.1962	middle
124	214	mtr-MIR2592u-p3_2ss13GT21CG	CCATCATCTAAATCAAGCCTGA	22	chr3.4	-	26302443	26302678	aaacttgccaaacgacgaggactcaagcatttcgctcagcattcatgtttttcctttgaaaagattaaatttttgttAGGCTGGTTTAGATGAAGGTAttaagtgtcaaggaatggacctcatttcgttgggacttgaataCCATCATCTAAAGCAAGCCTAAcaacaatttattcttttcaaaggaaaacatgaatgccaggtgaaatgcttgagtcctgttgtttggcaagttt	3	mtr-MIR2592ba,mtr-MIR2592aw,mtr-MIR2592u,	mtr-MIR2592u	gtcaaaCAACAGGACTCAAGCATTTCGCaagcacctcatgtttctcctttgaaaatattaaatttttgttatgctggtttagatgaaggtattaagtgtcaaggattgaacctcaattcggtggcacttgaataccatcatctaaagcaagcctcacaaaaatttattattttcaaagggaaaacatgaggtgtttggcgAAATGCTTGAGTCCTGTTGTT	mtr-MIR2592u-p3	ccatcatctaaagcaagcctca	3'	New	gp1	((((((((((((((((.(((((((((((((((((((..(((((((((((((.((((((((((((.((((((.(((((((((((.(((((((((.((((((((((..(((((((((.....)))))).)))..))))).))))).))))))))).).)))))))))).)))))).)))))))))))))))))))))))))..)))))))))))))))))))))))))))))))))))	236	37.3	-144.7	1.6	35.125	29.2583	44.875	14.375	20.0404	7.70455	41.1931	27.4638	51.2196	14.6184	20.4232	7.46025	middle
125	215	mtr-miR2592bm-5p	CTCGGCATTCATGTTTTTCCTT	22	chr5.3	+	28524591	28524826	aaacttgccaaacggcgaggactcaagcatttcgCTCGGCATTCATGTTTTTCCTTtgaaaagattaaattcttgttaggctggtttagatgaaagtattaagtgtcaaggaatggacctcatttcgttggtacttgaataccatcatctaaagcaagcctaacaaaaatttattcttttcaaaggaaaacatgaatgccggttgAAATGCTTGAGTCCTGTTGTTtggcaagttt	1	mtr-MIR2592an,	mtr-MIR2592an	aaacctgccaaacaacaggactcgagcatttcgCTCGGCATTCATGTTTTTCCTTtgaaaagattaaattcttgttaggctggtttagatgtaggtattaagtgtgaaggaatgaacctcatttcgttggcacttgaataccagcgtctaaagcacgcctaacaaaaatttattcttttcaaaggaaaacatgaatgccgggtgAAATGCTTGAGTCCTGTTGTTttgcaggttt	mtr-miR2592bm-5p	CTCGGCATTCATGTTTTTCCTT	5'	Yes	gp1	(((((((((((((..(.(((((((((((((((((..(((((((((((((((.((((((((((((.((((((.(((((((((((.(((((((((..(((((((((..(((((((((.....)))))).)))..))))).))))..))))))))).).)))))))))).)))))).)))))))))))))))))))))))))))..))))))))))))))))))..)))))))))))))	236	37.3	-143.1	1.6	2.33333	5.22222	4.66667	8.55556	3.55556	3.05556	2.73643	4.90193	5.32646	8.70041	3.62347	2.95867	low
125	216	mtr-miR2592a.2-3p	AAATGCTTGAGTCCTGTTGTT	21	chr5.3	+	28524591	28524826	aaacttgccaaacggcgaggactcaagcatttcgCTCGGCATTCATGTTTTTCCTTtgaaaagattaaattcttgttaggctggtttagatgaaagtattaagtgtcaaggaatggacctcatttcgttggtacttgaataccatcatctaaagcaagcctaacaaaaatttattcttttcaaaggaaaacatgaatgccggttgAAATGCTTGAGTCCTGTTGTTtggcaagttt	1	mtr-MIR2592an,	mtr-MIR2592an	aaacctgccaaacaacaggactcgagcatttcgCTCGGCATTCATGTTTTTCCTTtgaaaagattaaattcttgttaggctggtttagatgtaggtattaagtgtgaaggaatgaacctcatttcgttggcacttgaataccagcgtctaaagcacgcctaacaaaaatttattcttttcaaaggaaaacatgaatgccgggtgAAATGCTTGAGTCCTGTTGTTttgcaggttt	mtr-miR2592a.2-3p	AAATGCTTGAGTCCTGTTGTT	3'	Yes	gp1	(((((((((((((..(.(((((((((((((((((..(((((((((((((((.((((((((((((.((((((.(((((((((((.(((((((((..(((((((((..(((((((((.....)))))).)))..))))).))))..))))))))).).)))))))))).)))))).)))))))))))))))))))))))))))..))))))))))))))))))..)))))))))))))	236	37.3	-143.1	1.6	6.875	8.125	8.125	4.875	6.37374	2.45455	8.0627	7.62667	9.27375	4.95754	6.49549	2.37672	middle
126	217	mtr-miR2592a.2-3p	AAATGCTTGAGTCCTGTTGTT	21	chr8.4	+	31502324	31502487	AAATGCTTGAGTCCTGTTGTTtgacaagtttgaatttaccccattcaaaggtaagacaattgttgtagttgaaatgcacattccaactacaACAATTGTCTTACTCTGGATGgggaaattcaaacttgttaatcagcaggactccaacattcgataagcatctt	1	mtr-MIR2592ao,	mtr-MIR2592ao	gtgcttggcaAAATGCTTGAGTCCTGTTGTTttcaagtttgaatttatctcattcaaaggtaacacaattgttgtggttgaaatgcacattccaactgcaacaattgtcttactctggatggggcaattcaaacttgccaatcagcaggaccccaatattcgatcagcatctt	mtr-miR2592a.2-3p	AAATGCTTGAGTCCTGTTGTT	5'	Yes	gp1	..(((((((((((((((((.(((((((((((((((((.(((((((((..((((((((((((((((((((((.(((....))).)))))))))))))))))))))).)))))))))))))))))))))))))).)))))))))))...........))))))...	159	36.6	-93.5	1.6	6.875	8.125	8.125	4.875	6.37374	2.45455	8.0627	7.62667	9.27375	4.95754	6.49549	2.37672	middle
126	218	mtr-MIR2592ao-p3_1ss14TA	ACAATTGTCTTACACTGGATG	21	chr8.4	+	31502324	31502487	AAATGCTTGAGTCCTGTTGTTtgacaagtttgaatttaccccattcaaaggtaagacaattgttgtagttgaaatgcacattccaactacaACAATTGTCTTACTCTGGATGgggaaattcaaacttgttaatcagcaggactccaacattcgataagcatctt	1	mtr-MIR2592ao,	mtr-MIR2592ao	gtgcttggcaAAATGCTTGAGTCCTGTTGTTttcaagtttgaatttatctcattcaaaggtaacacaattgttgtggttgaaatgcacattccaactgcaacaattgtcttactctggatggggcaattcaaacttgccaatcagcaggaccccaatattcgatcagcatctt	mtr-MIR2592ao-p3	acaattgtcttactctggatg	3'	New	gp1	..(((((((((((((((((.(((((((((((((((((.(((((((((..((((((((((((((((((((((.(((....))).)))))))))))))))))))))).)))))))))))))))))))))))))).)))))))))))...........))))))...	159	36.6	-93.5	1.6	7.95	3.75	0	5.75	10.6237	1.70455	9.32341	3.52	0	5.84735	10.8267	1.6505	middle
127	219	mtr-miR2592ap	AGGCTGGTTTAGATGAAGGTA	21	chr1.2	+	27492996	27493423	aacaacttgattccgccagaagatcgtcattagttagggtaaggtgcattccaactacaacaattgtcttacctctgaaatggggtaattcaaacttgccaaacggccaggactcaagcattttgctcggcattcatgtttttcctttgaaaagattaaattcttgttAGGCTGGTTTAGATAAAGGTAttaagtgtcaaggaatgaacctcatttcgttggcacttgaataccatcatctaaagctaacctaacaaaaatttattcttttcaaaggaaaacatgaatgccgggcgaaatgcttgagtcctgttgtttggcaagtttgaatttaccccattcaaaggtaagacaattgttgtagttgaaatgcacattccaactacaACAATTGTCTTA…	2	mtr-MIR2592bf,mtr-MIR2592ap,	mtr-MIR2592ap	ttagggtaaggtgcattctaactacaacaattgtcttacctctgaaatggggtaattcaaatttgccaaacggccaggactcaagcatttcgCTCGGCATTCATGTTTTTCCTTtgaaaagattaaattctcgttAGGCTGGTTTAGATGAAGGTAttaagtgtcaaggaatgaacctcatttcgttggcacttgaataccatcatctaaagcaagcctaacaacaatttattcttttcaaaggaaaacatgaatgtcggacgaaatgcttgagtcatgttgtttgaccagtttgaatttaccctattcaaagataagacaattgttgtagttggaatgcacatttcaacta	mtr-miR2592ap	AGGCTGGTTTAGATGAAGGTA	5'	Yes	gp1	(((((.((((...(((((..(((.......(((((.(((....(((((((.(((((((((((((((((((((((.((.((((((((((((((((((((((((((..(.((((((((((((((((((((((((((((((((((.((((((((((((.((((((.((((((((.((((((((((...(((((((((((((((((((((.....)))))).)))))))))).)))))...)))).)))))).)))))))).)))))).)))))))))))))))))))))))))))))))))))))))))))))))..)))))))))))))))))).)))))))))).))))))))))))))))))))))).)))))))..))))))))..((....))....…	355	37.6	-240.1	1.5	50.5833	39.5278	53.25	36.1389	114.917	102.444	59.3219	37.1034	60.7787	36.7507	117.112	99.1962	middle
127	220	mtr-MIR2592bf-p3_1ss14TA	ACAATTGTCTTACACTGGATG	21	chr1.2	+	27492996	27493423	aacaacttgattccgccagaagatcgtcattagttagggtaaggtgcattccaactacaacaattgtcttacctctgaaatggggtaattcaaacttgccaaacggccaggactcaagcattttgctcggcattcatgtttttcctttgaaaagattaaattcttgttAGGCTGGTTTAGATAAAGGTAttaagtgtcaaggaatgaacctcatttcgttggcacttgaataccatcatctaaagctaacctaacaaaaatttattcttttcaaaggaaaacatgaatgccgggcgaaatgcttgagtcctgttgtttggcaagtttgaatttaccccattcaaaggtaagacaattgttgtagttgaaatgcacattccaactacaACAATTGTCTTA…	2	mtr-MIR2592bf,mtr-MIR2592ap,	mtr-MIR2592bf	attaacaacttgattccgccagaagatcgtcattagttagggtaaggtgcattccaactacaacaattatcttaccgctgaaatggggtaattcaaacttgccaaacggccaggactcaagcatttcgCTCGGCATTCATGTTTTTCCTTtgaaaagattaaattctttttAGGCTGGTTTAGATGAAGGTAttaagtgtcaaggaatgaacctcattttgttggcacttgaataccatcatctaaagcaaacctaacaaaaatttatcttttcaaaggaaaacatgaaagccgggtgaaatgttttagtcctgctgtttgacaagtttgaatttacatcattcaaaggtaagacaattgttatagttggaatgcacattccaactacaacaattgtct…	mtr-MIR2592bf-p3	acaattgtcttactctggatg	3'	New	gp1	(((((.((((...(((((..(((.......(((((.(((....(((((((.(((((((((((((((((((((((.((.((((((((((((((((((((((((((..(.((((((((((((((((((((((((((((((((((.((((((((((((.((((((.((((((((.((((((((((...(((((((((((((((((((((.....)))))).)))))))))).)))))...)))).)))))).)))))))).)))))).)))))))))))))))))))))))))))))))))))))))))))))))..)))))))))))))))))).)))))))))).))))))))))))))))))))))).)))))))..))))))))..((....))....…	355	37.6	-240.1	1.5	7.95	3.75	0	5.75	10.6237	1.70455	9.32341	3.52	0	5.84735	10.8267	1.6505	middle
128	221	mtr-miR2592ap	AGGCTGGTTTAGATGAAGGTA	21	chr4.1	+	48237264	48237364	aattcttgttAGGCTGGTTTAGATGAAGGTAttaagtgtcaaggaatgaacctcatttcgttggcacttgaataccatcatctaaagcaaacttaacaaaa	1	mtr-MIR2592ax,	mtr-MIR2592ax	aattcttgttAGGCTGGTTTAGATGAAGGTAttaagtgacaaggaatgaacctcatttcgttggaacttgaataccatcatctaaagcaaacccaacaaaaga	mtr-miR2592ap	AGGCTGGTTTAGATGAAGGTA	5'	Yes	gp1	.....((((((((.((.(((((((((.(((((((((((((((((((((.....)))))).))))))))))).)))).))))))))).))..))))))))..	94	34.7	-45.1	1.3	50.5833	39.5278	53.25	36.1389	114.917	102.444	59.3219	37.1034	60.7787	36.7507	117.112	99.1962	middle
129	222	mtr-miR2592ap	AGGCTGGTTTAGATGAAGGTA	21	chr1.2	+	30752381	30752484	aatttttgttAGGCTGGTTTAGATGAAGGTAttaagtgtcaaggaatgaacctcatttcgttggcacttgaataccatcatctaaagcaagcctaacaaaaatt	1	mtr-MIR2592bc,	mtr-MIR2592bc	aatttttgttAGGCTGGTTTAGATGAAGGTAttaagtgtcaaggaatgaacctcatttcgttgtcacttgaatatcatcatctaaagcaagcctaacaaaaatt	mtr-miR2592ap	AGGCTGGTTTAGATGAAGGTA	5'	Yes	gp1	((((((((((((((((.(((((((((.(((((((((((((((((((((.....)))))).)))))))))).))))).))))))))).).)))))))))))))))	104	34.6	-56.3	1.6	50.5833	39.5278	53.25	36.1389	114.917	102.444	59.3219	37.1034	60.7787	36.7507	117.112	99.1962	middle
130	223	mtr-miR2592ap	AGGCTGGTTTAGATGAAGGTA	21	chr3.3	-	91909453	91909555	aatttttgttAGGCTGGTTTAGATGAAGGTAttaagtgtcaaggaatggacctcatttcgttggcacttgaataCCATCATCTAAAGCAAGCCTAAcaaaaat	2	mtr-MIR2592at,mtr-MIR2592ar,	mtr-MIR2592ar	aatttttgctAGGCTGGTTTAGATGAAGGTAttaagtgtcaaggaatggacctcatttcgttggcacttgaataccatcatctaaagcaagcctaacaaaaat	mtr-miR2592ap	AGGCTGGTTTAGATGAAGGTA	5'	Yes	gp1	.(((((((((((((((.(((((((((.(((((((((((((((((((((.....)))))).)))))))))).))))).))))))))).).))))))))))))))	102	35.9	-54.8	1.5	50.5833	39.5278	53.25	36.1389	114.917	102.444	59.3219	37.1034	60.7787	36.7507	117.112	99.1962	middle
130	224	mtr-MIR2592at-p3_2ss13GT21AG	CCATCATCTAAATCAAGCCTGA	22	chr3.3	-	91909453	91909555	aatttttgttAGGCTGGTTTAGATGAAGGTAttaagtgtcaaggaatggacctcatttcgttggcacttgaataCCATCATCTAAAGCAAGCCTAAcaaaaat	2	mtr-MIR2592at,mtr-MIR2592ar,	mtr-MIR2592at	aatttttgttAGGCTGGTTTAGATGAAGGTAttaagtgtcaaggaatggacctcatttcgttggcacttgaataccatcatctaaagcaagcctaacaaaaat	mtr-MIR2592at-p3	ccatcatctaaagcaagcctaa	3'	New	gp1	.(((((((((((((((.(((((((((.(((((((((((((((((((((.....)))))).)))))))))).))))).))))))))).).))))))))))))))	102	35.9	-54.8	1.5	35.125	29.2583	44.875	14.375	20.0404	7.70455	41.1931	27.4638	51.2196	14.6184	20.4232	7.46025	middle
131	225	mtr-miR2592bm-5p	CTCGGCATTCATGTTTTTCCTT	22	chr6.2	-	77417266	77417455	agcatttcgCTCGGCATTCATGTTTTTCCTTtgaaaagattaaattcttgttaggctggtttagatgaaggtattaagtgtcaaggaatggacctcatttcgttggcacttgaataccatcatctaaagcaagcctaacaaaaatttattcttttcaaaGGAAAACATGAATGTCGGGTGaaatgcttga	1	mtr-MIR2592bn,	mtr-MIR2592bn	ctcgagcatttcgCTCGGCATTCATGTTTTTCCTTtgaaaatattaaattcttgttgggttggtttagatgaaggtattaagtgtcaagaaatgaacctcatttcgttggcacttgaataccatcatctaaagcacacctaacaaaaatttattcttttcaaaGGAAAACATGAATGTCGGGTGaaatgcttga	mtr-miR2592bm-5p	CTCGGCATTCATGTTTTTCCTT	5'	Yes	gp1	((((((((((((((((((((((((((.((((((((((((.((((((.(((((((((((.(((((((((.(((((((((((((((((((((.....)))))).)))))))))).))))).))))))))).).)))))))))).)))))).))))))))))))))))))))))))))))))))))))))...	187	35.8	-114	1.7	2.33333	5.22222	4.66667	8.55556	3.55556	3.05556	2.73643	4.90193	5.32646	8.70041	3.62347	2.95867	low
131	226	mtr-miR2592bm-3p	GGAAAACATGAATGTCGGGTG	21	chr6.2	-	77417266	77417455	agcatttcgCTCGGCATTCATGTTTTTCCTTtgaaaagattaaattcttgttaggctggtttagatgaaggtattaagtgtcaaggaatggacctcatttcgttggcacttgaataccatcatctaaagcaagcctaacaaaaatttattcttttcaaaGGAAAACATGAATGTCGGGTGaaatgcttga	1	mtr-MIR2592bn,	mtr-MIR2592bn	ctcgagcatttcgCTCGGCATTCATGTTTTTCCTTtgaaaatattaaattcttgttgggttggtttagatgaaggtattaagtgtcaagaaatgaacctcatttcgttggcacttgaataccatcatctaaagcacacctaacaaaaatttattcttttcaaaGGAAAACATGAATGTCGGGTGaaatgcttga	mtr-miR2592bm-3p	GGAAAACATGAATGTCGGGTG	3'	Yes	gp1	((((((((((((((((((((((((((.((((((((((((.((((((.(((((((((((.(((((((((.(((((((((((((((((((((.....)))))).)))))))))).))))).))))))))).).)))))))))).)))))).))))))))))))))))))))))))))))))))))))))...	187	35.8	-114	1.7	6	4	5.5	7.5	7	12	7.03654	3.75467	6.27761	7.62698	7.13371	11.6195	middle
132	227	mtr-miR2592ab_L+2	AACAACAGGACTCAAGCATTTCGC	24	chr6.4	+	23186362	23186712	agttggaatgtgcatttcaactacaacaattgtcttacctttgaatggggtaaattcaaacttgccaAACAACAGGACTCAAGCATTTCGCccggcattcatgttttcctttgaaaagaataaatttttgttaggcttgccttagatgatggtattcaagtgccaacgaaatgaggttcattccttgacacttaataccttcatctaaaccagcctaacaagaatttaatcttttcaaaggaaaaacatgaatgcagagcgaaatgcttgagtcctggccgtttgacaagtttgaattaccccatttcagaggtAAGGCAATTGTTGTAGTTGGAATGcaccttaccctaa	12	mtr-MIR2592ai,mtr-MIR2592z,mtr-MIR2592ah,mtr-MIR2592f,mtr-MIR2592i,mtr-MIR2592r,mtr-MIR2592g,mtr-MIR2592o,mtr-MIR2592b,mtr-MIR2592c,mtr-MIR2592k,mtr-MIR2592j,	mtr-MIR2592j	aaattcaaacctgcaaaaCAACAGGACTCAAGCATTTCGCcaaacacctcatgttttccctttaaaaataataaatttttgtgaggcttgctttagatgatggtattcaagtgccaccgaattgaggttcaatccttgacacttaataccttcatctaaaccagcataacaaaaatttaatattttcaaaggagaaacatgaggtgcttgcgAAATGCTTGAGTCCTGTTGTTtgacaagtttgaatta	mtr-miR2592ab	CAACAGGACTCAAGCATTTCGC	5'	Diff	gp1	....((((.((((((((((((((((((((((((((((((((((((((((((((.((((((((((.(((((..(((((((((((((((((((...(((((((((((((((((((((((((.(((((((((((((((((.(..((((((((.((((((.(((((.(((.(((.((.....))))).))).))))))))))).))))))))..)))))))))))))))))).)))))))))))).)))))))))))))...)))))))))))))))))))...))))).)))))))))))))))))).)))))))))))))))))))))))))))))))))))).)).))....	343	38.2	-214.1	1.6	2.95833	6.5	9.33333	0	10.5	3.75	3.4694	6.10134	10.6529	0	10.7006	3.6311	middle
132	228	mtr-MIR2592ai-p3_1ss23TG	AAGACAATTGTTGTAGTTGGAAGG	24	chr6.4	+	23186362	23186712	agttggaatgtgcatttcaactacaacaattgtcttacctttgaatggggtaaattcaaacttgccaAACAACAGGACTCAAGCATTTCGCccggcattcatgttttcctttgaaaagaataaatttttgttaggcttgccttagatgatggtattcaagtgccaacgaaatgaggttcattccttgacacttaataccttcatctaaaccagcctaacaagaatttaatcttttcaaaggaaaaacatgaatgcagagcgaaatgcttgagtcctggccgtttgacaagtttgaattaccccatttcagaggtAAGGCAATTGTTGTAGTTGGAATGcaccttaccctaa	12	mtr-MIR2592ai,mtr-MIR2592z,mtr-MIR2592ah,mtr-MIR2592f,mtr-MIR2592i,mtr-MIR2592r,mtr-MIR2592g,mtr-MIR2592o,mtr-MIR2592b,mtr-MIR2592c,mtr-MIR2592k,mtr-MIR2592j,	mtr-MIR2592ai	cagttggaatgtgcattccaaccacaacaattgtgttacctttgaatgggataaattcaaacctgcaaaaCAACAGGACTCAAGCATTTCGCcgagcacttcatgttttccctttgaaaagaataaatttttgtgaggcttgctttagatgatggtattcaagtgccacagaattgaggttcaatccttgacacttaataccttcatctaaaccagcataacaagaatttaatattttcaaaggagaaacatgaggtgctcgcgaaatgctcgagtcttgttgtttgacaagtttgaattaccccattcaaaggaagacaattgttgtagttggaatgcaccttaccctaa	mtr-MIR2592ai-p3	aagacaattgttgtagttggaatg	3'	New	gp1	....((((.((((((((((((((((((((((((((((((((((((((((((((.((((((((((.(((((..(((((((((((((((((((...(((((((((((((((((((((((((.(((((((((((((((((.(..((((((((.((((((.(((((.(((.(((.((.....))))).))).))))))))))).))))))))..)))))))))))))))))).)))))))))))).)))))))))))))...)))))))))))))))))))...))))).)))))))))))))))))).)))))))))))))))))))))))))))))))))))).)).))....	343	38.2	-214.1	1.6	0	0	0	0	0	0	0	0	0	0	0	0	low
133	229	mtr-miR2592ap	AGGCTGGTTTAGATGAAGGTA	21	chr6.4	-	23186331	23186748	atcaacaacttgattcctccagaagatcgtcgttagttagggtaaggtgcattccaactacaacaattgccttacctctgaaatggggtaattcaaacttgtcaaacggccaggactcaagcatttcgctctgcattcatgtttttcctttgaaaagattaaattcttgttAGGCTGGTTTAGATGAAGGTAttaagtgtcaaggaatgaacctcatttcgttggcacttgaataccatcatctaaggcaagcctaacaaaaatttattcttttcaaaggaaaacatgaatgccgggcgAAATGCTTGAGTCCTGTTGTTtggcaagtttgaatttaccccattcaaaggtaagacaattgttgtagttgaaatgcacattccaactacaacaattgtc…	5	mtr-MIR2592as,mtr-MIR2592aq,mtr-MIR2592bo,mtr-MIR2592p,mtr-MIR2592t,	mtr-MIR2592aq	ttaaggtaaggtgcattccaactgcaacaattgtcttacctctgaaatggggtaattcaaacttgtcaaacggccaggactcaagcatttcgCTCGGCATTCATGTTTTTCCTTtgaaaagattaaattcttgttAGGCTGGTTTAGATGAAGGTAttaagtgtcaaggaatgaacttcatttcgttggcaattgaataccatcatctaaagcaagcctaacaaaaatttatttttttcaaaggaaaacatgaatgccgggtgaaatgtttgagtcctgttgtttggcaagtttgaattgaccccattcaaaggtaagacaattgttgtagttggaatgcacattccaactg	mtr-miR2592ap	AGGCTGGTTTAGATGAAGGTA	5'	Yes	gp1	(((((....)))))(((((((((((((..(.(((((((.(((....(((((((.(((((((((((((((.(((((((.((.((((((((((((((((((((((((((..(.((((((((((((((((((((.(((((((((((((.((((((((((((.((((((.((((((((((.((((((((((.(((((((((((((((((((((.....)))))).)))))))))).))))).)))))))).)).)))))))))).)))))).))))))))))))))))))))))))).)))))))))))))))))))))..)))))))))))))))))).)))))))))).))))))).))))))))))))))).)))))))..))))))))..)).)..)))…	399	38.8	-237.2	1.5	50.5833	39.5278	53.25	36.1389	114.917	102.444	59.3219	37.1034	60.7787	36.7507	117.112	99.1962	middle
133	230	mtr-miR2592a.2-3p	AAATGCTTGAGTCCTGTTGTT	21	chr6.4	-	23186331	23186748	atcaacaacttgattcctccagaagatcgtcgttagttagggtaaggtgcattccaactacaacaattgccttacctctgaaatggggtaattcaaacttgtcaaacggccaggactcaagcatttcgctctgcattcatgtttttcctttgaaaagattaaattcttgttAGGCTGGTTTAGATGAAGGTAttaagtgtcaaggaatgaacctcatttcgttggcacttgaataccatcatctaaggcaagcctaacaaaaatttattcttttcaaaggaaaacatgaatgccgggcgAAATGCTTGAGTCCTGTTGTTtggcaagtttgaatttaccccattcaaaggtaagacaattgttgtagttgaaatgcacattccaactacaacaattgtc…	5	mtr-MIR2592as,mtr-MIR2592aq,mtr-MIR2592bo,mtr-MIR2592p,mtr-MIR2592t,	mtr-MIR2592p	gggctaattcaaacttgtcaaaCAACAGGACTCAAGCATTTCGCaagcgcctcatgtttctcctttgaaagtattaaatttttgttatgctggtttagatgaatgtattaagtgtcaaggattgaacctcaattcggtggcacttgaataccatcatccaaagctagcctcacagaaatttattattttcaaagggaaaacatgaggtgtttggcgAAATGCTTGAGTCCTGTTGTTttgcaggtttgaatttatc	mtr-miR2592a.2-3p	AAATGCTTGAGTCCTGTTGTT	3'	Yes	gp1	(((((....)))))(((((((((((((..(.(((((((.(((....(((((((.(((((((((((((((.(((((((.((.((((((((((((((((((((((((((..(.((((((((((((((((((((.(((((((((((((.((((((((((((.((((((.((((((((((.((((((((((.(((((((((((((((((((((.....)))))).)))))))))).))))).)))))))).)).)))))))))).)))))).))))))))))))))))))))))))).)))))))))))))))))))))..)))))))))))))))))).)))))))))).))))))).))))))))))))))).)))))))..))))))))..)).)..)))…	399	38.8	-237.2	1.5	6.875	8.125	8.125	4.875	6.37374	2.45455	8.0627	7.62667	9.27375	4.95754	6.49549	2.37672	middle
134	231	mtr-miR2592ap	AGGCTGGTTTAGATGAAGGTA	21	chr8.3	+	29800358	29800788	atcaacagcttgattccgccagaagatcgtcattagttagggtaaggtgcattccaactacaacaattgtcttacctctgaaatggggtaattcaaacttgccaaacggccatgactcaagcatttcgatcggcattcatgtttttactttgaaaagattaaattcttgttAGGCTGGTTTAGATGAAGGTAttaagtgtcaaggaatgaacctcatttcgttggcacttgaataccatcatctaaagcaagtctaacaaaaatttattcttttcaaaggaaaacatgaatgccgggcgaaatgcttgagtcctgttgtTTGGCAAGTTTGAATTTACCCCattcaaaggtaagacaattgttgtagttgaaatgcacattccaactacaacaattgtc…	1	mtr-MIR2592ay,	mtr-MIR2592ay	atcaaaagcttgattccgccagaagatcgtcattagttagggtaaggtgcattccaactgcaacaattgtcttacctctgaaatggggtaattcaaacttgccaaacggccaggactcaagcatttcgCTCGGCATTCATGTTTTTCCTTtgaaaagattaaattcttgttAGGCTGGTTTAGATGAAGGTAttaagtgtcaaggaatgaacctcatttcgttggcacttgaataccatcatctaaagcacacctaacaaaaatttattcttttcaaaggaaaacatgaatgccgggtgaaatgcttgagtcaggttgtttggcaagtttgaatttaccccattcaaaggtaagacaattgttgtagttggaatgcacattccaactgcaacaattatc…	mtr-miR2592ap	AGGCTGGTTTAGATGAAGGTA	5'	Yes	gp1	...(((((.((((.(((((((((((((......(((((.(((....(((((((.(((((((((((((((((((((((.((((.((((((((((((((((((((((((..(...(((((((((((((((..((((((((((((((((.(((((((((((.((((((.(((((((((((.(((((((((.(((((((((((((((((((((.....)))))).)))))))))).))))).))))))))).).)))))))))).)))))).)))))))))))))))))))))))))))..)))))))))))))))..)..)))))))))))))))).)))))))))))).))))))))))))))))))))))).)))))))..))))))))........)))…	355	37.4	-234.9	1.5	50.5833	39.5278	53.25	36.1389	114.917	102.444	59.3219	37.1034	60.7787	36.7507	117.112	99.1962	middle
134	232	mtr-MIR2592ay-p3	TTGGCAAGTTTGAATTTACCCC	22	chr8.3	+	29800358	29800788	atcaacagcttgattccgccagaagatcgtcattagttagggtaaggtgcattccaactacaacaattgtcttacctctgaaatggggtaattcaaacttgccaaacggccatgactcaagcatttcgatcggcattcatgtttttactttgaaaagattaaattcttgttAGGCTGGTTTAGATGAAGGTAttaagtgtcaaggaatgaacctcatttcgttggcacttgaataccatcatctaaagcaagtctaacaaaaatttattcttttcaaaggaaaacatgaatgccgggcgaaatgcttgagtcctgttgtTTGGCAAGTTTGAATTTACCCCattcaaaggtaagacaattgttgtagttgaaatgcacattccaactacaacaattgtc…	1	mtr-MIR2592ay,	mtr-MIR2592ay	atcaaaagcttgattccgccagaagatcgtcattagttagggtaaggtgcattccaactgcaacaattgtcttacctctgaaatggggtaattcaaacttgccaaacggccaggactcaagcatttcgCTCGGCATTCATGTTTTTCCTTtgaaaagattaaattcttgttAGGCTGGTTTAGATGAAGGTAttaagtgtcaaggaatgaacctcatttcgttggcacttgaataccatcatctaaagcacacctaacaaaaatttattcttttcaaaggaaaacatgaatgccgggtgaaatgcttgagtcaggttgtttggcaagtttgaatttaccccattcaaaggtaagacaattgttgtagttggaatgcacattccaactgcaacaattatc…	mtr-MIR2592ay-p3	ttggcaagtttgaatttacccc	3'	New	gp1	...(((((.((((.(((((((((((((......(((((.(((....(((((((.(((((((((((((((((((((((.((((.((((((((((((((((((((((((..(...(((((((((((((((..((((((((((((((((.(((((((((((.((((((.(((((((((((.(((((((((.(((((((((((((((((((((.....)))))).)))))))))).))))).))))))))).).)))))))))).)))))).)))))))))))))))))))))))))))..)))))))))))))))..)..)))))))))))))))).)))))))))))).))))))))))))))))))))))).)))))))..))))))))........)))…	355	37.4	-234.9	1.5	148	179.667	99	130	362.04	208.788	173.568	168.647	112.997	132.201	368.956	202.168	middle
135	233	mtr-miR2592ab_L+2	AACAACAGGACTCAAGCATTTCGC	24	chr7.4	+	49378820	49379037	atgttggagtcctgccgtttaacaagtttgaattaccccattcaaaggaagacaattgttgcagttgaaaggtgcatacattccgtacctactgacgatcttttggacgtttataccgaacgtttgtaccttccaactacaacaattgtcttacctttgaatgaggtaaattcaaacttgacaAACAACAGGACTCAAGCATTTTGCacgacattcat	1	mtr-MIR2592ad,	mtr-MIR2592ad	gatgcttatcagatgttggagtcatgccgtttaacaagtttgaattaccccattcaaaggaaaacaattgttgcagttggaaggtgcattcattccgtacctactaacgatcttttggacgtttataccgaacgtttgtaccttccaactacaacaattgtgttacctttgaatggggtaaattcaaactggccaaaCAACAGGACTCAAGCATTTCGCccggcattcat	mtr-miR2592ab	CAACAGGACTCAAGCATTTCGC	3'	Diff	gp1	((((((((((((((..((((..(((((((((((((((.(((((((((((((((((((((((.(((((.((((((((.((.(((.(((......((((.((.....))))))..))).))).)).)))))))).))))).))))))))))))).)))))))))).))))).))))))))))..))))..))))))))..((.....)).))))))....	190	39	-99.7	1.2	2.95833	6.5	9.33333	0	10.5	3.75	3.4694	6.10134	10.6529	0	10.7006	3.6311	middle
136	234	mtr-miR2592ab_L+2	AACAACAGGACTCAAGCATTTCGC	24	chr5.3	-	27403853	27404205	cagttggaatgtgcattccaactacaacaattgtcttacctctgaaatggggtaaattcaaatttaccaAACAACAGGACTCAAGCATTTCGCtcgacattcatgctttcctttgaaaagaataaatttttgtcaagcttgatttagattaaggtattcaagtgccaccgaaatgaggtccattccttgacacctaataccttcatctaaaccagcctaacaagaatttaatcttttcaaaggaaaaacatgaatgccgagcgaaatgcttgagtcctcgctgtttggcaagtttgaattaccccatttcagaggtAACACAAATGTTGTAGTTGGAATGcaccttaccctaa	1	mtr-MIR2592aj,	mtr-MIR2592aj	cagttggaatgtgcatttcaaccacaacaattgtgttacctttgaatgggataaattcaaaaaaCAACAGGACTCAAGCATTTCGCcaagcacttcatgttttccctttgaaaagaataaatttttgtcaggcttgctttagatgatggtattcaagtgccaccgaattgaggttcaatccttgacacttaataccttcatctaaaccagcataacaagaatttaatattttcaaaggagaaacatgaggcgcttgcgaaatgctcgagtcctgttgttcgacaagtttgaattaccccattcaaaggaagacaattgttgtagttggaatgcaccttaccctaa	mtr-miR2592ab	CAACAGGACTCAAGCATTTCGC	5'	Diff	gp1	.....((((.(((((((((((((((((((.((((.((((((((((((((((((.(((((((((((.(((((((..(((((((((((((((((((((.((((((((.(((((((((((((((.(((((((((((...(((.(.(((((((.((((((((...(((.((..(((.((.....)))))..)).)))..)))))))).))))))).))))...))))))))))).)))))))))))))))..)))))))).)))))))))))))))))))))...))))))).))))))))))))))))))))))))))))).)))).))))))))))))))))))).)).))....	344	38	-195.6	1.5	2.95833	6.5	9.33333	0	10.5	3.75	3.4694	6.10134	10.6529	0	10.7006	3.6311	middle
136	235	mtr-MIR2592aj-p3_2ss8TA20GA	AAGACAAATGTTGTAGTTGAAATG	24	chr5.3	-	27403853	27404205	cagttggaatgtgcattccaactacaacaattgtcttacctctgaaatggggtaaattcaaatttaccaAACAACAGGACTCAAGCATTTCGCtcgacattcatgctttcctttgaaaagaataaatttttgtcaagcttgatttagattaaggtattcaagtgccaccgaaatgaggtccattccttgacacctaataccttcatctaaaccagcctaacaagaatttaatcttttcaaaggaaaaacatgaatgccgagcgaaatgcttgagtcctcgctgtttggcaagtttgaattaccccatttcagaggtAACACAAATGTTGTAGTTGGAATGcaccttaccctaa	1	mtr-MIR2592aj,	mtr-MIR2592aj	cagttggaatgtgcatttcaaccacaacaattgtgttacctttgaatgggataaattcaaaaaaCAACAGGACTCAAGCATTTCGCcaagcacttcatgttttccctttgaaaagaataaatttttgtcaggcttgctttagatgatggtattcaagtgccaccgaattgaggttcaatccttgacacttaataccttcatctaaaccagcataacaagaatttaatattttcaaaggagaaacatgaggcgcttgcgaaatgctcgagtcctgttgttcgacaagtttgaattaccccattcaaaggaagacaattgttgtagttggaatgcaccttaccctaa	mtr-MIR2592aj-p3	aagacaattgttgtagttggaatg	3'	New	gp1	.....((((.(((((((((((((((((((.((((.((((((((((((((((((.(((((((((((.(((((((..(((((((((((((((((((((.((((((((.(((((((((((((((.(((((((((((...(((.(.(((((((.((((((((...(((.((..(((.((.....)))))..)).)))..)))))))).))))))).))))...))))))))))).)))))))))))))))..)))))))).)))))))))))))))))))))...))))))).))))))))))))))))))))))))))))).)))).))))))))))))))))))).)).))....	344	38	-195.6	1.5	0	0	0	0	1	0	0	0	0	0	1.0191	0	low
137	236	mtr-MIR2592bj-p5	AAGTGTCAAGGAATGGACCTCATT	24	chr5.4	-	40554817	40555007	ccaatattcgactggcattcccattgttcttttcaaaagattaaattcttgttaggctggtttaaatgaaggtattgAAGTGTCAAGGAATGGACCTCATTcttttgacacttgaatACCGTCATTTAAACCAAACCTAacaagaatttaatcttttgaatggaacaatgggaatgtcggtcgaatattgg	2	mtr-MIR2592bi,mtr-MIR2592bj,	mtr-MIR2592bj	ccaatatttgaccggaattcccactgttcctgtcaaaagattaaattcttgttaggctgatttaaatgaaggtattgaagtgtcaaggaatggacctcattcttttcacatttgaataccatcatttaatcccaacctaacaagaatttaatcttttgaaTGGAACATTGGGAATGCCGGTcgaatattgg	mtr-MIR2592bj-p5	aagtgtcaaggaatggacctcatt	5'	New	gp1	(((((((((((((((((((((((((((((..(((((((((((((((((((((((((.((((((((((((.((((((.(((((((((((((((.....))))).)))))))))).)))))).))))))))))))..)))))))))))))))))))))))))..)))))))))))))))))))))))))))))	191	35.1	-128.4	1.9	0	3.5	3	0	2.08333	10	0	3.28534	3.42415	0	2.12313	9.68293	low
137	237	mtr-MIR2592bi-p3_2ss4GC18AG	ACCCTCATTTAAACCAAGCCTA	22	chr5.4	-	40554817	40555007	ccaatattcgactggcattcccattgttcttttcaaaagattaaattcttgttaggctggtttaaatgaaggtattgAAGTGTCAAGGAATGGACCTCATTcttttgacacttgaatACCGTCATTTAAACCAAACCTAacaagaatttaatcttttgaatggaacaatgggaatgtcggtcgaatattgg	2	mtr-MIR2592bi,mtr-MIR2592bj,	mtr-MIR2592bi	ccaatattcgacccgcattcccattgtccctgtcaaaagattaaattcttgttagtccggtttaaatgaaggtattgaagtgtcaaggaatgaacctcattcttttcacacttaaataccgtcatttaaaccaaacctaacaagaatttaatcttttgaaTGGAACATTGGGAATGCCGGTcgtatattgg	mtr-MIR2592bi-p3	accgtcatttaaaccaaaccta	3'	New	gp1	(((((((((((((((((((((((((((((..(((((((((((((((((((((((((.((((((((((((.((((((.(((((((((((((((.....))))).)))))))))).)))))).))))))))))))..)))))))))))))))))))))))))..)))))))))))))))))))))))))))))	191	35.1	-128.4	1.9	7	0	0	5	0	0	8.2093	0	0	5.08465	0	0	low
138	238	mtr-miR2592bm-5p	CTCGGCATTCATGTTTTTCCTT	22	chr1.1	+	78203773	78203966	ctcaagcatttcgCTCGGCATTCATGTTTTTCCTTtgaaaagattaaattcttgttaggttggtttagatgaaggtattaagtgtcaaggaatggacctcatttcgttggcacttgaatatcatcttctaaagcaagcctaacaaaaatttattcttttcaaaGGAAAACATGAATGTCGGGTGaaatgcttga	1	mtr-MIR2592bm,	mtr-MIR2592bm	ctcaagcatttcgCTCGGCATTCATGTTTTTCCTTtgaaaagattaaattcttgttaggttgatttagatgaatgtattaagtgtcaatgaatgaaccttatttgttggcacttgaatatcatcatctaaaacaagcgtagcaaaaatttattcttttcaaaGGAAAACATGAATGTCGGGTGaaatgcttga	mtr-miR2592bm-5p	CTCGGCATTCATGTTTTTCCTT	5'	Yes	gp1	.(((((((((((((((((((((((((((((.((((((((((((.((((((.(((((((((((.((((((.((.(((((((((((((((((((((.....)))))).)))))))))).))))).)).)))))).).)))))))))).)))))).)))))))))))))))))))))))))))))))))))))))))	193	35.1	-110.1	1.6	2.33333	5.22222	4.66667	8.55556	3.55556	3.05556	2.73643	4.90193	5.32646	8.70041	3.62347	2.95867	low
138	239	mtr-miR2592bm-3p	GGAAAACATGAATGTCGGGTG	21	chr1.1	+	78203773	78203966	ctcaagcatttcgCTCGGCATTCATGTTTTTCCTTtgaaaagattaaattcttgttaggttggtttagatgaaggtattaagtgtcaaggaatggacctcatttcgttggcacttgaatatcatcttctaaagcaagcctaacaaaaatttattcttttcaaaGGAAAACATGAATGTCGGGTGaaatgcttga	1	mtr-MIR2592bm,	mtr-MIR2592bm	ctcaagcatttcgCTCGGCATTCATGTTTTTCCTTtgaaaagattaaattcttgttaggttgatttagatgaatgtattaagtgtcaatgaatgaaccttatttgttggcacttgaatatcatcatctaaaacaagcgtagcaaaaatttattcttttcaaaGGAAAACATGAATGTCGGGTGaaatgcttga	mtr-miR2592bm-3p	GGAAAACATGAATGTCGGGTG	3'	Yes	gp1	.(((((((((((((((((((((((((((((.((((((((((((.((((((.(((((((((((.((((((.((.(((((((((((((((((((((.....)))))).)))))))))).))))).)).)))))).).)))))))))).)))))).)))))))))))))))))))))))))))))))))))))))))	193	35.1	-110.1	1.6	6	4	5.5	7.5	7	12	7.03654	3.75467	6.27761	7.62698	7.13371	11.6195	middle
139	240	mtr-miR2592ap	AGGCTGGTTTAGATGAAGGTA	21	chr1.2	+	16756119	16756461	gaatgcaccttccaactacaacaattgtcttcctttgaatggggtaattcaaacttgccaaacggcgggactccaacattcgcccgacattcccattgttcctttcaaaagattaaattcttgttAGGCTGGTTTAGATGAAGGTAttaaagtgtcaaggaatggacctcattcttttgacacttgaataccatcatttaaaccaagtctaacaataatttaatcttttgaatggaacaatgggaatgtcggacgtatgttagagtcctgctgtttggcaagtttgaatttacctcattcaaaggtaAGACAATTGTTGTAGTTGGAATGCaccttccaacta	1	mtr-MIR2592bb,	mtr-MIR2592bb	acggaatgaatgcaccttgcagctacaacaattgtcttacctctgaaatggggtaattcaaatttgccaaacggccaggactcaagcatttcgCTCGGCATTCATGTTTTTCCTTtgaaaagattaaattctcgttAGGCTGGTTTAGATGAAGGTAttgaagtgtcaaggaatggacctcattcttttgacatttgaataccatcatttaatcccagcttaataagaatttaatcttttgaatggaacattgggaatgtcggacgaaatgcttgagtcatgttgtttgaccagtttgaatttaccctattcaaagataagacaattgttgtagttggaatgcacatttcaacta	mtr-miR2592ap	AGGCTGGTTTAGATGAAGGTA	5'	Yes	gp1	(((((((..((((((((((((((((((((((((((((((((((((((((((((((((((((((((((((((((.(((((.((.(((((((((((((((((((.((((((((((((((((.(((((((((((((((((((((.((((((.(((((((((((((((.....))))).)))))))))).)))))).))))))))))).)))))))))).)))))))))))))))).))))))))))))))))))).)).))))).)))))))))))))))))))))))))))).)))))))))))))).))))))))))))))))))))))))))..)))......	337	38.2	-227.8	1.7	50.5833	39.5278	53.25	36.1389	114.917	102.444	59.3219	37.1034	60.7787	36.7507	117.112	99.1962	middle
139	241	mtr-MIR2592bb-p3_2ss22TG24CT	AGACAATTGTTGTAGTTGGAAGGT	24	chr1.2	+	16756119	16756461	gaatgcaccttccaactacaacaattgtcttcctttgaatggggtaattcaaacttgccaaacggcgggactccaacattcgcccgacattcccattgttcctttcaaaagattaaattcttgttAGGCTGGTTTAGATGAAGGTAttaaagtgtcaaggaatggacctcattcttttgacacttgaataccatcatttaaaccaagtctaacaataatttaatcttttgaatggaacaatgggaatgtcggacgtatgttagagtcctgctgtttggcaagtttgaatttacctcattcaaaggtaAGACAATTGTTGTAGTTGGAATGCaccttccaacta	1	mtr-MIR2592bb,	mtr-MIR2592bb	acggaatgaatgcaccttgcagctacaacaattgtcttacctctgaaatggggtaattcaaatttgccaaacggccaggactcaagcatttcgCTCGGCATTCATGTTTTTCCTTtgaaaagattaaattctcgttAGGCTGGTTTAGATGAAGGTAttgaagtgtcaaggaatggacctcattcttttgacatttgaataccatcatttaatcccagcttaataagaatttaatcttttgaatggaacattgggaatgtcggacgaaatgcttgagtcatgttgtttgaccagtttgaatttaccctattcaaagataagacaattgttgtagttggaatgcacatttcaacta	mtr-MIR2592bb-p3	agacaattgttgtagttggaatgc	3'	New	gp1	(((((((..((((((((((((((((((((((((((((((((((((((((((((((((((((((((((((((((.(((((.((.(((((((((((((((((((.((((((((((((((((.(((((((((((((((((((((.((((((.(((((((((((((((.....))))).)))))))))).)))))).))))))))))).)))))))))).)))))))))))))))).))))))))))))))))))).)).))))).)))))))))))))))))))))))))))).)))))))))))))).))))))))))))))))))))))))))..)))......	337	38.2	-227.8	1.7	0	0	0	0	1	2	0	0	0	0	1.0191	1.93659	low
140	242	mtr-miR2592ab_L+2	AACAACAGGACTCAAGCATTTCGC	24	chr2.1	-	27630472	27630724	gggacaaattcaaacttgccaAACAACAGGACTCAAGCATTTCGCtcggcattcatgatttcctttgaaaagaataaatttttgttaggcttgatttagatgaaggtattcaagtgccaccgaaatgaggtccattccttgacacttaataccttcatctaaaccagcctaacaagaatttaatcttttcaaaggaaaaacatgaacactgagcgaaatgcttgagtcctcgccgtttggcaagtttgaatta	1	mtr-MIR2592q,	mtr-MIR2592q	gggataaattcaaacctgcaaaaCAACAGGACTCAAGCATTTCGCcaaacacctcatgttttccctttgaaaataataaatttctgtgaggctagctttggatgatggtattcaagtgccaccgaattgaggttcaatccttgacacttaatacattcatctaaaccagcataacaaaaatttaatactttcaaaggagaaacatgaggcgcttgcgAAATGCTTGAGTCCTGTTGTTtgacaagtttgaattagcc	mtr-miR2592ab	CAACAGGACTCAAGCATTTCGC	5'	Diff	gp1	......((((((((((((((((((...((((((((((((((((((((((..((((((.(((((((((((((((.(((((((((((((((((.(.((((((((((((((((.(((((.((..(((.((.....)))))..)).))))))))))))))))))))).)))))))))))))))))).)))))))))))))))..))))))..))))))))))))))))))))))....)))))))))))))))))).	246	37.9	-146.5	1.5	2.95833	6.5	9.33333	0	10.5	3.75	3.4694	6.10134	10.6529	0	10.7006	3.6311	middle
141	243	mtr-miR2592ap	AGGCTGGTTTAGATGAAGGTA	21	chr1.4	+	32673756	32674009	gggtaattcaaacttgccaaacggccaggactcaagcatttcgctcggcattcatgtttttcctttgaaaagattaaatttttgttAGGCTGGTTTAGATGAAGGTAttaagtgtcaaggaatgaacctcatttcgttggcacttgaataCCATCATCTAAAGCAAGCCTAAcaaaaatttattcttttcaaaggaaaacatgaatgccgggtgaaatgcttgagtcctgttgtttggcgagtttgaatttacc	7	mtr-MIR2592br,mtr-MIR2592n,mtr-MIR2592d,mtr-MIR2592v,mtr-MIR2592w,mtr-MIR2592x,mtr-MIR2592y,	mtr-MIR2592br	aattcaaacttgccaaacgactaggactcaagtatttcgctcggcattcatgtttttcctttgaaaagattaaattcttgttAGGCTGGTTTAGATGAAGGTAttaagtgtcaaggaatgaacctcatttcgttggcacttgaataccatcatctaaagcaaggttaataaaaaatttattctttcaaaggaaaacatgaatgccgggggAAATGCTTGAGTCCTGTTGTTtgacaagtttgaatt	mtr-miR2592ap	AGGCTGGTTTAGATGAAGGTA	5'	Yes	gp1	.(((((((((((((((((((((..(.((((((((((((((((((((((((((((((((((.((((((((((((.((((((((((((((((((.(((((((((.(((((((((((((((((((((.....)))))).)))))))))).))))).))))))))).).))))))))))))))))).)))))))))))))))))))))))))))))))))))))))))))))))..)))))))))))))))))).)))	253	38.2	-172.3	1.8	50.5833	39.5278	53.25	36.1389	114.917	102.444	59.3219	37.1034	60.7787	36.7507	117.112	99.1962	middle
141	244	mtr-MIR2592d-p3_2ss13GT21CG	CCATCATCTAAATCAAGCCTGA	22	chr1.4	+	32673756	32674009	gggtaattcaaacttgccaaacggccaggactcaagcatttcgctcggcattcatgtttttcctttgaaaagattaaatttttgttAGGCTGGTTTAGATGAAGGTAttaagtgtcaaggaatgaacctcatttcgttggcacttgaataCCATCATCTAAAGCAAGCCTAAcaaaaatttattcttttcaaaggaaaacatgaatgccgggtgaaatgcttgagtcctgttgtttggcgagtttgaatttacc	7	mtr-MIR2592br,mtr-MIR2592n,mtr-MIR2592d,mtr-MIR2592v,mtr-MIR2592w,mtr-MIR2592x,mtr-MIR2592y,	mtr-MIR2592d	aggtaattcaaacttgtcaaaCAACAGGACTCAAGCATTTCGCaagcgcctcatgtttctcctttgaaaatattaaatttttgttatgctggtttagatgaaggtattaagtgtcaaggattgaacctcaattcggtggcacttgagtaccatcatctaaagcaagcctcacaaaaatttattattttcaaagggaaaacatgaggtgtttggcgAAATGCTTGAGTCCTGTTGTTttgcaggtttgaatttatc	mtr-MIR2592d-p3	ccatcatctaaagcaagcctca	3'	New	gp1	.(((((((((((((((((((((..(.((((((((((((((((((((((((((((((((((.((((((((((((.((((((((((((((((((.(((((((((.(((((((((((((((((((((.....)))))).)))))))))).))))).))))))))).).))))))))))))))))).)))))))))))))))))))))))))))))))))))))))))))))))..)))))))))))))))))).)))	253	38.2	-172.3	1.8	35.125	29.2583	44.875	14.375	20.0404	7.70455	41.1931	27.4638	51.2196	14.6184	20.4232	7.46025	middle
142	245	mtr-miR2592a.2-3p	AAATGCTTGAGTCCTGTTGTT	21	chr8.3	+	29800443	29800697	gggtaattcaaacttgccaaacggccatgactcaagcatttcgatcggcattcatgtttttactttgaaaagattaaattcttgttaggctggtttagatgaaggtattaagtgtcaaggaatgaacctcatttcgttggcacttgaataccatcatctaaagcaagtctaacaaaaatttattcttttcaaaggaaaacatgaatgccgggcgAAATGCTTGAGTCCTGTTGTTtggcaagtttgaatttaccc	3	mtr-MIR2592l,mtr-MIR2592m,mtr-MIR2592h,	mtr-MIR2592h	aggtaattcaaacttgccaaacggccataactcgagcatttcgtccagcgttcatatttttcctttgaaaagattaaattcttgttatgctggtttagatgaaggtattaagtgtcaaggaatgaacctcgtttcgttggcacttgaatatcatcatctaaagcaagcctaccaaaaatttattcttttcaaaggaaaagcatgaatgcgggacgAAATGCTTGAGTCCTGTTGTTggcatgtttaaatttaccc	mtr-miR2592a.2-3p	AAATGCTTGAGTCCTGTTGTT	3'	Yes	gp1	((((((((((((((((((((((..(...(((((((((((((((..((((((((((((((((.(((((((((((.((((((.(((((((((((.(((((((((.(((((((((((((((((((((.....)))))).)))))))))).))))).))))))))).).)))))))))).)))))).)))))))))))))))))))))))))))..)))))))))))))))..)..)))))))))))))))))).))))	255	37.3	-156.6	1.6	6.875	8.125	8.125	4.875	6.37374	2.45455	8.0627	7.62667	9.27375	4.95754	6.49549	2.37672	middle
143	246	mtr-miR2592ab_L+2	AACAACAGGACTCAAGCATTTCGC	24	chr1.4	+	28275806	28276220	gtttgaattgccccatccagagtaagacaattgttgtagttggaatgtgcatttgaactacaacaattgtcttacctttgaatggggtaaattcaaacttgccaAACAACAGGACTCAAGCATTTCGCccgacattcatgttttcctttgaaaagaataaatttttgttaggtttgctttagatgatggtattcaagtgccaacaaaatgaggttcattctttgacacttaataccttcatctaaaccagcctaacaagaatttaatcttttcaaAGGAAAAACATGAATGTCGAGcgaaatgcttgagttctggccgtttggcaagtttgaattaccccatttcagaggtaagacaattgttgtagttggaatgcaccttaccctaactaatgacgat…	1	mtr-MIR2592ac,	mtr-MIR2592ac	gtttgaattgtcccatccagagtaagacaattgttgtacttggaatgtacattacaactacaacaattgtcttacctttgaatggggtaaattcaaacttgccaaaCAACAGGACTCAAGCATTTCGCccgacattcatgtttttcctttgaaaagaataaatttttgttaggcttgccttagatgatggtattcaagtgccaacgaaatgaggttcattccttgacacttcaataccttcatctaaaccatcctaacaagaatttaatcttttcaaaggaaaaacatgaatgtcgggcgaatgttgaggacttgtcgtttggcaagtttgaattaccccatttcagaggtaagacgattgttgtagttggaatgcaccttaccctacctaatgacgat…	mtr-miR2592ab	CAACAGGACTCAAGCATTTCGC	5'	Diff	gp1	..((((.(((((............(((..(((((..(((((((((.(((((((..(((((((((((((((((((((((((((((((((((.((((((((((((((((..(((((((((((((((((((.(((((((((((((((((((((((((((.(((((((((((((((((.(.(((((((((.((((((.(((((.(((...((((.....))))..))).))))))))))).))))))))).)))))))))))))))))).)))))))))))).))))))))))))))).)))))))))))))))))))...)))))))))))))))))))))))).)))))))))))))))))))))))))))..))))))).))...)))))).)..)))))…	413	37.1	-231.2	1.5	2.95833	6.5	9.33333	0	10.5	3.75	3.4694	6.10134	10.6529	0	10.7006	3.6311	middle
143	247	mtr-MIR2592ac-p3_1ss17TC	AGGAAAAACATGAATGCCGGG	21	chr1.4	+	28275806	28276220	gtttgaattgccccatccagagtaagacaattgttgtagttggaatgtgcatttgaactacaacaattgtcttacctttgaatggggtaaattcaaacttgccaAACAACAGGACTCAAGCATTTCGCccgacattcatgttttcctttgaaaagaataaatttttgttaggtttgctttagatgatggtattcaagtgccaacaaaatgaggttcattctttgacacttaataccttcatctaaaccagcctaacaagaatttaatcttttcaaAGGAAAAACATGAATGTCGAGcgaaatgcttgagttctggccgtttggcaagtttgaattaccccatttcagaggtaagacaattgttgtagttggaatgcaccttaccctaactaatgacgat…	1	mtr-MIR2592ac,	mtr-MIR2592ac	gtttgaattgtcccatccagagtaagacaattgttgtacttggaatgtacattacaactacaacaattgtcttacctttgaatggggtaaattcaaacttgccaaaCAACAGGACTCAAGCATTTCGCccgacattcatgtttttcctttgaaaagaataaatttttgttaggcttgccttagatgatggtattcaagtgccaacgaaatgaggttcattccttgacacttcaataccttcatctaaaccatcctaacaagaatttaatcttttcaaaggaaaaacatgaatgtcgggcgaatgttgaggacttgtcgtttggcaagtttgaattaccccatttcagaggtaagacgattgttgtagttggaatgcaccttaccctacctaatgacgat…	mtr-MIR2592ac-p3	aggaaaaacatgaatgtcggg	3'	New	gp1	..((((.(((((............(((..(((((..(((((((((.(((((((..(((((((((((((((((((((((((((((((((((.((((((((((((((((..(((((((((((((((((((.(((((((((((((((((((((((((((.(((((((((((((((((.(.(((((((((.((((((.(((((.(((...((((.....))))..))).))))))))))).))))))))).)))))))))))))))))).)))))))))))).))))))))))))))).)))))))))))))))))))...)))))))))))))))))))))))).)))))))))))))))))))))))))))..))))))).))...)))))).)..)))))…	413	37.1	-231.2	1.5	0	4	0	0	4.5	13.5	0	3.75467	0	0	4.58596	13.072	middle
144	248	mtr-miR2592ap	AGGCTGGTTTAGATGAAGGTA	21	chr1.2	-	18382787	18382893	taaattcttgttAGGCTGGTTTAGATGAAGGTAttaagtgtcaaggaatggacctcatttcgttggcacttgaataCCATCATCTAAAGCAAGCCTAAcaaaaattt	3	mtr-MIR2592bg,mtr-MIR2592au,mtr-MIR2592av,	mtr-MIR2592av	aattcttgttAGGCTGGTTTAGATGAAGGTAgtaagtgccaaggaatgaacctcatttcgttggcacttgaataccatcatctaaagcaagcctaacaaaaat	mtr-miR2592ap	AGGCTGGTTTAGATGAAGGTA	5'	Yes	gp1	.(((((.(((((((((((.(((((((((.(((((((((((((((((((((.....)))))).))))))))))).)))).))))))))).)).))))))))).)))))	106	35.5	-53	1.4	50.5833	39.5278	53.25	36.1389	114.917	102.444	59.3219	37.1034	60.7787	36.7507	117.112	99.1962	middle
144	249	mtr-MIR2592au-p3_2ss13GT21AG	CCATCATCTAAATCAAGCCTGA	22	chr1.2	-	18382787	18382893	taaattcttgttAGGCTGGTTTAGATGAAGGTAttaagtgtcaaggaatggacctcatttcgttggcacttgaataCCATCATCTAAAGCAAGCCTAAcaaaaattt	3	mtr-MIR2592bg,mtr-MIR2592au,mtr-MIR2592av,	mtr-MIR2592au	attcttgttAGGCTGGTTTAGATGAAGGTAttaagtgtcaaggaatgaacctcatttcgttgtcacttgaataccatcatctaaagcaagcctaacaaaaat	mtr-MIR2592au-p3	ccatcatctaaagcaagcctaa	3'	New	gp1	.(((((.(((((((((((.(((((((((.(((((((((((((((((((((.....)))))).))))))))))).)))).))))))))).)).))))))))).)))))	106	35.5	-53	1.4	35.125	29.2583	44.875	14.375	20.0404	7.70455	41.1931	27.4638	51.2196	14.6184	20.4232	7.46025	middle
145	250	mtr-miR2592ab_L+2	AACAACAGGACTCAAGCATTTCGC	24	chr8.3	-	29800394	29800745	tagttggaatgtgcatttcaactacaacaattgtcttacctttgaatggggtaaattcaaacttgccaAACAACAGGACTCAAGCATTTCGCccggcattcatgttttcctttgaaaagaataaatttttgttagacttgctttagatgatggtattcaagtgccaacgaaatgaggttcattccttgacacttaataccttcatctaaaccagcctaacaagaatttaatcttttcaaagtaaaaacatgaatgccgatcgaaatgcttgagtcatggccgtttggcaagtttgaattaccccaTTTCAGAGGTAAGACAATTGTtgtagttggaatgcaccttaccctaa	2	mtr-MIR2592al,mtr-MIR2592ae,	mtr-MIR2592al	tagttggaatgtgcattccaactacaacaattgtcttacctttgaatggggtaaattcaaactagccaaaCAACAGGACTCAAGCATTTCGCctcgcgttcatgtttttcctttgaaaattataaatttttgttaggctttctttagatgatgatattcaagtgccaacgaaatgaggttcattcgttgacacttaataccttcatctaaaccagcataacaagaatttaatcttttgaaaggaaaaatatgaacgatgggccaaatgcttgagtcatggccgtttggcaagtttgagttaccccaattcagaggtaagacaattgttgtagttggaatgcaccttaccctaa	mtr-miR2592ab	CAACAGGACTCAAGCATTTCGC	5'	Diff	gp1	(((..((((.((((((((((((((((((((((((((((((((((((((((((((.((((((((((((((((..((.(((((((((((((((..(((((((((((((((.(((((((((((.((((((((((((((.((.(.(((((((((.((((((.(((((.(((.(((.((.....))))).))).))))))))))).))))))))).))).)))))))))))))).)))))))))))..)))))))))))))))..))))))))))))))).))...)))))))))))))))))))))))).)))))))))))))))))))))))))))))))))))).)).))))).	351	36.9	-206.8	1.6	2.95833	6.5	9.33333	0	10.5	3.75	3.4694	6.10134	10.6529	0	10.7006	3.6311	middle
145	251	mtr-MIR2592ae-p3	TTTCAGAGGTAAGACAATTGT	21	chr8.3	-	29800394	29800745	tagttggaatgtgcatttcaactacaacaattgtcttacctttgaatggggtaaattcaaacttgccaAACAACAGGACTCAAGCATTTCGCccggcattcatgttttcctttgaaaagaataaatttttgttagacttgctttagatgatggtattcaagtgccaacgaaatgaggttcattccttgacacttaataccttcatctaaaccagcctaacaagaatttaatcttttcaaagtaaaaacatgaatgccgatcgaaatgcttgagtcatggccgtttggcaagtttgaattaccccaTTTCAGAGGTAAGACAATTGTtgtagttggaatgcaccttaccctaa	2	mtr-MIR2592al,mtr-MIR2592ae,	mtr-MIR2592ae	tagtcggaatgtgcattccaactacaacaattgtcttacctttgaatgggtaaatttaaacatgccaaCAACAGGACTCAAGCATTTCGtcccgcattcatgcttttcctttgaaaagaataaatttttggtaggcttgctttagatgatgatattcaagtgccaacgaaacgaggttcattccttgacacttaataccttcatctaaaccagcataacaagaatttaatcttttcaaaggaaaaatatgaacgctggacgaaatgctcgagttatggccgtttggcaagtttgaattacctcatttcagaggtaagacaattgttgtagttggaatgcaccttaccctaa	mtr-MIR2592ae-p3	tttcagaggtaagacaattgt	3'	New	gp1	(((..((((.((((((((((((((((((((((((((((((((((((((((((((.((((((((((((((((..((.(((((((((((((((..(((((((((((((((.(((((((((((.((((((((((((((.((.(.(((((((((.((((((.(((((.(((.(((.((.....))))).))).))))))))))).))))))))).))).)))))))))))))).)))))))))))..)))))))))))))))..))))))))))))))).))...)))))))))))))))))))))))).)))))))))))))))))))))))))))))))))))).)).))))).	351	36.9	-206.8	1.6	228	200	306	125	173	69	267.388	187.733	349.264	127.116	176.305	66.8122	middle
146	252	mtr-miR2592ab_L+2	AACAACAGGACTCAAGCATTTCGC	24	chr8.3	-	29800447	29800689	tcaaacttgccaAACAACAGGACTCAAGCATTTCGCccggcattcatgttttcctttgaaaagaataaatttttgttagacttgctttagatgatggtattcaagtgccaacgaaatgaggttcattccttgacacttaataccttcatctaaaccagcctaacaagaatttaatcttttcaaagtaaaaacatgaatgccgatcgaaatgcttgagtcatggccgtttggcaagtttgaatt	1	mtr-MIR2592am,	mtr-MIR2592am	aagtcaaacttgccaaaCAACAGGACTCAAGCATTTCGCcccgcattcatgtttttcctttgaaaagaataaattttgttagacttgctttagatggtggtattcaagtgccaatgaaatgatgttcattccttgacacttaataccttcatctaaaccagcataacaagaatttaatcttttcaaaggaaaaacatgaacgttgggcaaaatgcttgagtcatggtcgtttggcaagtttgaatt	mtr-miR2592ab	CAACAGGACTCAAGCATTTCGC	5'	Diff	gp1	(((((((((((((((..((.(((((((((((((((..(((((((((((((((.(((((((((((.((((((((((((((.((.(.(((((((((.((((((.(((((.(((.(((.((.....))))).))).))))))))))).))))))))).))).)))))))))))))).)))))))))))..)))))))))))))))..))))))))))))))).))...)))))))))))))))...	240	36.6	-131.1	1.5	2.95833	6.5	9.33333	0	10.5	3.75	3.4694	6.10134	10.6529	0	10.7006	3.6311	middle
147	253	mtr-miR2592ap	AGGCTGGTTTAGATGAAGGTA	21	chr3.4	-	54436500	54436729	tgccaaacgccaggactcaggcatttcgctcgacattcatgtttttcctttgaaaagattaaattattgtcAGACTGGTTTAGATGAAGGTAttaagtgtcaaggaatggacctcatttcgttggcacttgaataccatcatctaaagcaagcctaacaaaaatttattcttttcaaaggaaaacatgaatgcggagtgAAATGCTTGAGTCCTGTTGTTtgacaagttt	1	mtr-MIR2592az,	mtr-MIR2592az	acctgccaaacaacaggactcgagcatttcgctcggcattcatgtttttcctttgaaaagattaaattcttgttAGGCTGGTTTAGATGAAGGTAttaagtgtcaaggaatgaacctcatttcgttggcacttgaataccatcatctaaagcacgcctaacaaaaatttaatcttttcaaaggaaaacatgaatgtcgggtgAAATGCTTGAGTCCTGTTGTTtgacaggttt	mtr-miR2592ap	AGGCTGGTTTAGATGAAGGTA	5'	Yes	gp1	((.(((((..(((((((((((((((((((((..((((((((((((.((((((((((((.((((((.((((.((.(((.(((((((((.(((((((((((((((((((((.....)))))).)))))))))).))))).))))))))).).)).)).)))).)))))).))))))))))))))))))))))))..)))))))))))))))))))))..))))).)).....	225	37.4	-124.4	1.4	50.5833	39.5278	53.25	36.1389	114.917	102.444	59.3219	37.1034	60.7787	36.7507	117.112	99.1962	middle
147	254	mtr-miR2592a.2-3p	AAATGCTTGAGTCCTGTTGTT	21	chr3.4	-	54436500	54436729	tgccaaacgccaggactcaggcatttcgctcgacattcatgtttttcctttgaaaagattaaattattgtcAGACTGGTTTAGATGAAGGTAttaagtgtcaaggaatggacctcatttcgttggcacttgaataccatcatctaaagcaagcctaacaaaaatttattcttttcaaaggaaaacatgaatgcggagtgAAATGCTTGAGTCCTGTTGTTtgacaagttt	1	mtr-MIR2592az,	mtr-MIR2592az	acctgccaaacaacaggactcgagcatttcgctcggcattcatgtttttcctttgaaaagattaaattcttgttAGGCTGGTTTAGATGAAGGTAttaagtgtcaaggaatgaacctcatttcgttggcacttgaataccatcatctaaagcacgcctaacaaaaatttaatcttttcaaaggaaaacatgaatgtcgggtgAAATGCTTGAGTCCTGTTGTTtgacaggttt	mtr-miR2592a.2-3p	AAATGCTTGAGTCCTGTTGTT	3'	Yes	gp1	((.(((((..(((((((((((((((((((((..((((((((((((.((((((((((((.((((((.((((.((.(((.(((((((((.(((((((((((((((((((((.....)))))).)))))))))).))))).))))))))).).)).)).)))).)))))).))))))))))))))))))))))))..)))))))))))))))))))))..))))).)).....	225	37.4	-124.4	1.4	6.875	8.125	8.125	4.875	6.37374	2.45455	8.0627	7.62667	9.27375	4.95754	6.49549	2.37672	middle
148	255	mtr-miR2592ab_L+2	AACAACAGGACTCAAGCATTTCGC	24	chr1.4	-	32673757	32674012	tggggtaaattcaaactcgccaAACAACAGGACTCAAGCATTTCACccggcattcatgttttcctttgaaaagaataaatttttgttaggcttgctttagatgatggtattcaagtgccaacgaaatgaggttcattccttgacacttaataccttcatctaaaccagcctaacaaaaatttaatcttttcaaAGGAAAAACATGAATGCCGAGcgaaatgcttgagtcctggccgtttggcaagtttgaattacc	3	mtr-MIR2592s,mtr-MIR2592af,mtr-MIR2592e,	mtr-MIR2592e	tgggataaattcaaacctgcaaaaCAACAGGACTCAAGCATTTCGCcaaacacctcatgttttccctttgaaaataataaatttttgtgaggcttgctttagatgatggtactcaagtgccaccgaattgaggttcaatccttgacacttaataccttcatctaaaccagcataacaaaaatttaatattttcaaaggagaaacatgaggcgcttgcgAAATGCTTGAGTCCTGTTGTTtgacaagtttgaattacct	mtr-miR2592ab	CAACAGGACTCAAGCATTTCGC	5'	Diff	gp1	...(((.((((((((((.(((((((..(((((((((((((((((...(((((((((((((((((((((((((((.(((((((((((((((((.(.(((((((((.((((((.(((((.(((.(((.((.....))))).))).))))))))))).))))))))).)))))))))))))))))).)))))))))))).)))))))))))))))...)))))))))))))))))...))))))).)))))))))))))	253	38.3	-147.9	1.5	2.95833	6.5	9.33333	0	10.5	3.75	3.4694	6.10134	10.6529	0	10.7006	3.6311	middle
148	256	mtr-MIR2592s-p3_1ss20AG	AGGAAAAACATGAATGCCGGG	21	chr1.4	-	32673757	32674012	tggggtaaattcaaactcgccaAACAACAGGACTCAAGCATTTCACccggcattcatgttttcctttgaaaagaataaatttttgttaggcttgctttagatgatggtattcaagtgccaacgaaatgaggttcattccttgacacttaataccttcatctaaaccagcctaacaaaaatttaatcttttcaaAGGAAAAACATGAATGCCGAGcgaaatgcttgagtcctggccgtttggcaagtttgaattacc	3	mtr-MIR2592s,mtr-MIR2592af,mtr-MIR2592e,	mtr-MIR2592s	agataaattcaaacctgtcaaaCAACAGGACTCAAGCATTTCGCtcgacgttcatgttttcctttgaaaagaataaatttttgttaggcttgctttagatgatgatattcaagtgacaacgaaatgaggttcattccttgacacttaataccttcatctaaaccagcctaacaaaaatttaatcttttcaaaggaaaaacatgaatgccgagcgAAATGCTTGAGTCATGTTGTTtggcaggtttgaatttatc	mtr-MIR2592s-p3	aggaaaaacatgaatgccgag	3'	New	gp1	...(((.((((((((((.(((((((..(((((((((((((((((...(((((((((((((((((((((((((((.(((((((((((((((((.(.(((((((((.((((((.(((((.(((.(((.((.....))))).))).))))))))))).))))))))).)))))))))))))))))).)))))))))))).)))))))))))))))...)))))))))))))))))...))))))).)))))))))))))	253	38.3	-147.9	1.5	0	4	0	0	4.5	13.5	0	3.75467	0	0	4.58596	13.072	middle
149	257	mtr-MIR2592bl-p5_1ss22TG	TTCAAAGGTAAGATAATTGTTG	22	chr6.2	+	10580132	10580258	tgttgtttggcaagtttgaatttacctcaTTCAAAGGTAAGATAATTGTTGtagtttgaaggtgccttccaactacaACAATTGTCTTCCTCTGGATGggataattcaaacttgttaaacggcagga	1	mtr-MIR2592bl,	mtr-MIR2592bl	agttgttgttTGGCAAGTTTGAATTTACCTCAttcaaaggtaagataattgttttagttggaaggtgccttccaactacaacaattgtcctcctctggatgGAGTAATTCAAACTTGTTAAAcggcagga	mtr-MIR2592bl-p5	ttcaaaggtaagataattgttt	5'	New	gp1	((..((((..((((((((((((...((((((((.(((.((((((((((((((((((.((((....)))).))))))))))))))))))))).))))))))..))))))))))))..))))..))...	124	37	-68.5	1.5	2	4.66667	0	0	9	5.33333	2.34551	4.38045	0	0	9.17192	5.16423	low
149	258	mtr-MIR2592bl-p3_2ss10CT21GA	ACAATTGTCTTCCTCTGGATA	21	chr6.2	+	10580132	10580258	tgttgtttggcaagtttgaatttacctcaTTCAAAGGTAAGATAATTGTTGtagtttgaaggtgccttccaactacaACAATTGTCTTCCTCTGGATGggataattcaaacttgttaaacggcagga	1	mtr-MIR2592bl,	mtr-MIR2592bl	agttgttgttTGGCAAGTTTGAATTTACCTCAttcaaaggtaagataattgttttagttggaaggtgccttccaactacaacaattgtcctcctctggatgGAGTAATTCAAACTTGTTAAAcggcagga	mtr-MIR2592bl-p3	acaattgtcctcctctggatg	3'	New	gp1	((..((((..((((((((((((...((((((((.(((.((((((((((((((((((.((((....)))).))))))))))))))))))))).))))))))..))))))))))))..))))..))...	124	37	-68.5	1.5	1.2	0	0	0	5	0	1.40731	0	0	0	5.09551	0	low
150	259	mtr-MIR2593b-p3_1ss14AT	CATACATCATTAATTGAATGAACC	24	chr6.2	-	78383625	78383739	ttataagcaaaaatttacattttagattcattcatttaatgatgcacatggtctttattatagaccaCATACATCATTAAATGAATGAACCtaaaatatagttttttgcttatat	2	mtr-MIR2593b,mtr-MIR2593c,	mtr-MIR2593b	ttataagcaaaagtttacattttagattcattcatttaatgatgcacatggtctttattatagaccacatacatcaTTAAATGAATGAACCTAGAATatagttttttgcttatat	mtr-MIR2593b-p3	catacatcaTTAAATGAATGAACC	3'	New	gp1	.((((((((((((..((.(((((((.((((((((((((((((((....((((((.......))))))....)))))))))))))))))).))))))).))..)))))))))))).	113	22.6	-49.6	1.9	25.25	59.75	39.5833	78.5	60.9167	63.4167	29.6121	56.0854	45.1798	79.8291	62.0803	61.4059	middle
151	260	mtr-MIR2593a-p3_1ss14AT	CATACATCATTAATTGAATGAACC	24	chr2.1	+	72521610	72521724	ttataagcaaaaatttacattttagattcattcatttaatgatgcacatggtctttattatagaccaCATACATCATTAAATGAATGAACCtaaaatgtagttttttgcttatat	1	mtr-MIR2593a,	mtr-MIR2593a	ttataagcaaaaatttacattttagattcattcatttaatgatgcacatggtctttattgtagaccacatacatcaTTAAATGAATGAACCTAGAATgtagtttttttgcttatat	mtr-MIR2593a-p3	catacatcaTTAAATGAATGAACC	3'	New	gp1	.((((((((((((..((((((((((.((((((((((((((((((....((((((.......))))))....)))))))))))))))))).))))))))))..)))))))))))).	113	23.5	-55.6	2.1	25.25	59.75	39.5833	78.5	60.9167	63.4167	29.6121	56.0854	45.1798	79.8291	62.0803	61.4059	middle
152	261	mtr-MIR2593d-p5_2ss18TA22AG	GATGTATGTGGTTCATAATATGGA	24	chr3.2	-	6590196	6590280	tttgacattttaggttcattcaattcatGATGTATGTGGTTCATATTATAGAccaCATACATCATGAATTGAATGAACCtaaaaa	1	mtr-MIR2593d,	mtr-MIR2593d	ttttgacttttagattcattcaatcgatgatgtatgtggttcatattatagagcacATACATCATTGATTGAATGAACCTaaaaatcaaa	mtr-MIR2593d-p5	gatgtatgtggttcatattataga	5'	New	gp1	.......((((((((((((((((((((((((((((((((((.........)))))))))))))))))))))))))))))))))).	77	28.2	-51.6	2.2	0	0	6	0	0	10	0	0	6.84831	0	0	9.68293	low
152	262	mtr-miR2593d_L+1R-1_1ss12GA	CATACATCATTAATTGAATGAACC	24	chr3.2	-	6590196	6590280	tttgacattttaggttcattcaattcatGATGTATGTGGTTCATATTATAGAccaCATACATCATGAATTGAATGAACCtaaaaa	1	mtr-MIR2593d,	mtr-MIR2593d	ttttgacttttagattcattcaatcgatgatgtatgtggttcatattatagagcacATACATCATTGATTGAATGAACCTaaaaatcaaa	mtr-miR2593d	ATACATCATTGATTGAATGAACCT	3'	Diff	gp1	.......((((((((((((((((((((((((((((((((((.........)))))))))))))))))))))))))))))))))).	77	28.2	-51.6	2.2	25.25	59.75	39.5833	78.5	60.9167	63.4167	29.6121	56.0854	45.1798	79.8291	62.0803	61.4059	middle
153	263	mtr-miR2593d_L+1R-1_1ss12GA	CATACATCATTAATTGAATGAACC	24	chr5.2	+	20494336	20494420	ttttgactttttagatttattcacttaatagtgtatctggtctataatataaatcaCATACATCATTAATTTAATGAACCtaaaa	1	mtr-MIR2593e,	mtr-MIR2593e	ttttgacttttagattcattcaatcaataatgtatttggtctataatataaatcacATACATCATTGATTGAATGAACCTaaaagttaaa	mtr-miR2593d	ATACATCATTGATTGAATGAACCT	3'	Diff	gp1	........((((((.((((((...(((((..(((((.((((.(((...))).)))).)))))..)))))...)))))).))))))	77	21.2	-14.9	0.8	25.25	59.75	39.5833	78.5	60.9167	63.4167	29.6121	56.0854	45.1798	79.8291	62.0803	61.4059	middle
154	264	mtr-MIR2599-p5_2ss13TC20AG	AAGGAATCTACTCTATTCAGCACA	24	chr3.4	+	45779208	45779378	taaacaaggaataaaacatgtggtacAAGGAATCTACTTTATTCAGCACActaacctaatttccgagacatgttacatacctgaaacatgtattagaaattagggtttttcttggtttgtgtgctgaacaaagtAGATTCCTTGCACCCACATGATTTattccttgtttat	1	mtr-MIR2599,	mtr-MIR2599	taaacaaagaataaaacataTGGGTACAAGGAATCTACTTTattcaacacactaacctaatttccgagacattttacatgcctgaaacatgtcttagaaattatggtttttcttggtttgtgtgctgaacaaagtagattccttgtacccacatgatttattccttgtttat	mtr-MIR2599-p5	AAGGAATCTACTTTattcaacaca	5'	New	gp1	(((((((((((((((.(((((((..(((((((((((((((.((((((((((.((((.((((((..(.(((((((.((....)).))))))).)..)))))).(((....))).)))).)))))))))).)))))))))))))))...))))))).))))))))))))))).	170	33.9	-88	1.5	6	0	0	7	0	5	7.03654	0	0	7.11852	0	4.84146	low
154	265	mtr-MIR2599-p3_1ss21AC	AGATTCCTTGTACCCACATGCTTT	24	chr3.4	+	45779208	45779378	taaacaaggaataaaacatgtggtacAAGGAATCTACTTTATTCAGCACActaacctaatttccgagacatgttacatacctgaaacatgtattagaaattagggtttttcttggtttgtgtgctgaacaaagtAGATTCCTTGCACCCACATGATTTattccttgtttat	1	mtr-MIR2599,	mtr-MIR2599	taaacaaagaataaaacataTGGGTACAAGGAATCTACTTTattcaacacactaacctaatttccgagacattttacatgcctgaaacatgtcttagaaattatggtttttcttggtttgtgtgctgaacaaagtagattccttgtacccacatgatttattccttgtttat	mtr-MIR2599-p3	agattccttgtacccacatgattt	3'	New	gp1	(((((((((((((((.(((((((..(((((((((((((((.((((((((((.((((.((((((..(.(((((((.((....)).))))))).)..)))))).(((....))).)))).)))))))))).)))))))))))))))...))))))).))))))))))))))).	170	33.9	-88	1.5	0	7	0	0	5	8	0	6.57067	0	0	5.09551	7.74634	low
155	266	mtr-MIR2600c-p5_2ss10TC24TG	ATTGACCAACCACAATGTCACAAG	24	chr2.1	+	15619468	15619552	gtgacATTGACCAATCACAATGTCACAATgcttgtgaaagagagagaaacacAAGCATTGTGACATTGTGATTGGTcaatgtcac	1	mtr-MIR2600c,	mtr-MIR2600c	gtgacattgaccaatcacaatgtcacaatgcttgtgaaagagagagaaacacAAGCATTGTGGCATTGTGATTGGTcaatgtcac	mtr-MIR2600c-p5	attgaccaatcacaatgtcacaat	5'	New	gp1	((((((((((((((((((((((((((((((((((((.............))))))))))))))))))))))))))))))))))))	85	40	-62.2	1.8	0	0	0	0	0	0	0	0	0	0	0	0	low
155	267	mtr-miR2600b_1ss11GA	AAGCATTGTGACATTGTGATTGGT	24	chr2.1	+	15619468	15619552	gtgacATTGACCAATCACAATGTCACAATgcttgtgaaagagagagaaacacAAGCATTGTGACATTGTGATTGGTcaatgtcac	1	mtr-MIR2600c,	mtr-MIR2600c	gtgacattgaccaatcacaatgtcacaatgcttgtgaaagagagagaaacacAAGCATTGTGGCATTGTGATTGGTcaatgtcac	mtr-miR2600b	AAGCATTGTGGCATTGTGATTGGT	3'	Diff	gp1	((((((((((((((((((((((((((((((((((((.............))))))))))))))))))))))))))))))))))))	85	40	-62.2	1.8	0	4.5	0	5	0	2.5	0	4.224	0	5.08465	0	2.42073	low
156	268	mtr-miR2600b_1ss11GA	AAGCATTGTGACATTGTGATTGGT	24	chr2.1	+	9229155	9229239	gtgacattggccaatcacaatgtcacaatgcttgtgaaagagagagaaacacAAGCATTGTGACATTGTGATTGGTcaatgtcac	2	mtr-MIR2600b,mtr-MIR2600d,	mtr-MIR2600d	gtgacgttggccaatcataatgtcacaatgcttgtgaaagagagagaaacacAAGCATTGTGGCATTGTGATTGGTcaatgtcac	mtr-miR2600b	AAGCATTGTGGCATTGTGATTGGT	3'	Diff	gp1	((((((((((((((((((((((((((((((((((((.............))))))))))))))))))))))))))))))))))))	85	41.2	-61.6	1.8	0	4.5	0	5	0	2.5	0	4.224	0	5.08465	0	2.42073	low
157	269	mtr-miR2601_L+1R+1	TTATTTGGTATCGCTTTGGTCCCT	24	chr4.3	+	11251540	11251754	ttttggtcccttaagtatTTATTTGGTATCGCTTTGGTCCCTtaactaaaaaaaagattgtttgagtactttaatttaattttcgttacactatttggtcccttccgttaggtttaataaaaaaacgttaagtgtggtacacgtgtcgttttggcattggctctgaaaacgTTAAGGGACCAAAGCGATACCaaataaatatttaagggaccaaa	1	mtr-MIR2601,	mtr-MIR2601	attttggtcctttaagtattTATTTGGTATCGCTTTGGTCCCttaactaaaaaaaagattgtttgagtactttaatttaattttcgttacattttttggtccattccgttaggtttaataaaaaatgttaagtgtgatacacgtgtcgttttggcattggctctggaaacattaagggaccaaagtgataccaaataaatacttacgggaccaaaag	mtr-miR2601	TATTTGGTATCGCTTTGGTCCC	5'	Diff	gp1	.(((((((((((((((((((((((((((((((((((((((((((((...................(((((...((((((((((..(((.(((...(((......)))...))).)))..)))....)))))))..)))))..(((((.....))))).............)))))))))))))))))))))))))))))))))))))))))))))	214	34	-94	1.3	0	0	0	0	0	18	0	0	0	0	0	17.4293	middle
157	270	mtr-MIR2601-p3_2ss15TC21CT	TTAAGGGACCAAAGCGATACT	21	chr4.3	+	11251540	11251754	ttttggtcccttaagtatTTATTTGGTATCGCTTTGGTCCCTtaactaaaaaaaagattgtttgagtactttaatttaattttcgttacactatttggtcccttccgttaggtttaataaaaaaacgttaagtgtggtacacgtgtcgttttggcattggctctgaaaacgTTAAGGGACCAAAGCGATACCaaataaatatttaagggaccaaa	1	mtr-MIR2601,	mtr-MIR2601	attttggtcctttaagtattTATTTGGTATCGCTTTGGTCCCttaactaaaaaaaagattgtttgagtactttaatttaattttcgttacattttttggtccattccgttaggtttaataaaaaatgttaagtgtgatacacgtgtcgttttggcattggctctggaaacattaagggaccaaagtgataccaaataaatacttacgggaccaaaag	mtr-MIR2601-p3	ttaagggaccaaagtgatacc	3'	New	gp1	.(((((((((((((((((((((((((((((((((((((((((((((...................(((((...((((((((((..(((.(((...(((......)))...))).)))..)))....)))))))..)))))..(((((.....))))).............)))))))))))))))))))))))))))))))))))))))))))))	214	34	-94	1.3	0	0	0	5	16.5	6	0	0	0	5.08465	16.8152	5.80976	middle
158	271	mtr-miR2603_R-1_1ss6TC	TTTGGCATTGGTCCCTGCACT	21	chr2.3	-	17723201	17723524	ttggtccctgcacttctttttgTTTGGCATTGGTCCCTGCACTttgtaaaaatattggtattggtccctctgttaactttctgttaaaaaaaaaacacaaaactaacggagtgccacgtggcccaatcatttcatgccacgtggcaccaataccaataTTTTTACAAAGTGCAGGGACCaataccaatatttttacaaagtgcagggaccaataccaatagttttgtgttttttttttaacagaaagttaacagagggaccaataccaatatttttacaaagtgcagggaccaattccaaacaaaaaaaagtgcagggaccaat	1	mtr-MIR2603,	mtr-MIR2603	ttggtccctgcacttttttgTTTGGTATTGGTCCCTGCACTTtgtaaaaatattggtattggttcctctgttaactttctgttaaaaaaaaaacacaaaaccaacggagtgcggcccaatcatttcacgcccacgtggcaccaatatcaatatttttacaaattgcagggacaaataccaatattttacaaagtgcagggcccaataccaatagttttgggttttttttttacagaaagttaatagagggaccaataccaatatttttacaaagtgcaaggaccaattccaaacaaaaaaaagtgtagggaccaat	mtr-miR2603	TTTGGTATTGGTCCCTGCACTT	5'	Diff	gp1	(((((((((((((((.(((((((((((.(((((((((((((((((((((((((((((((((((((((((((((((((((((((((((((((((((((((((((((..((.((((((((((((.............)))))))))))).....((..((((((...((((((..((........))..))))))...))))))..))........))..))))))))))))))))))))))))))))))))))))))))))))))))))))))))))))))))))))))))))))).))))))))))).))))))))))))))).	323	37.7	-204.9	1.7	1321	1171	743	1036	940	917	1549.21	1099.18	848.048	1053.54	957.956	887.924	high
158	272	mtr-MIR2603-p3_1ss16AG	TTTTTACAAAGTGCAGGGACC	21	chr2.3	-	17723201	17723524	ttggtccctgcacttctttttgTTTGGCATTGGTCCCTGCACTttgtaaaaatattggtattggtccctctgttaactttctgttaaaaaaaaaacacaaaactaacggagtgccacgtggcccaatcatttcatgccacgtggcaccaataccaataTTTTTACAAAGTGCAGGGACCaataccaatatttttacaaagtgcagggaccaataccaatagttttgtgttttttttttaacagaaagttaacagagggaccaataccaatatttttacaaagtgcagggaccaattccaaacaaaaaaaagtgcagggaccaat	1	mtr-MIR2603,	mtr-MIR2603	ttggtccctgcacttttttgTTTGGTATTGGTCCCTGCACTTtgtaaaaatattggtattggttcctctgttaactttctgttaaaaaaaaaacacaaaaccaacggagtgcggcccaatcatttcacgcccacgtggcaccaatatcaatatttttacaaattgcagggacaaataccaatattttacaaagtgcagggcccaataccaatagttttgggttttttttttacagaaagttaatagagggaccaataccaatatttttacaaagtgcaaggaccaattccaaacaaaaaaaagtgtagggaccaat	mtr-MIR2603-p3	tttttacaaagtgcaaggacc	3'	New	gp1	(((((((((((((((.(((((((((((.(((((((((((((((((((((((((((((((((((((((((((((((((((((((((((((((((((((((((((((..((.((((((((((((.............)))))))))))).....((..((((((...((((((..((........))..))))))...))))))..))........))..))))))))))))))))))))))))))))))))))))))))))))))))))))))))))))))))))))))))))))).))))))))))).))))))))))))))).	323	37.7	-204.9	1.7	1068	1219	692	961	876	928	1252.5	1144.24	789.838	977.27	892.733	898.576	high
159	273	mtr-MIR2604-p5_1ss1AG	GTTTTTATGTGGGAGTGTTTTAGC	24	chr3.2	+	87925966	87926252	gtttgctagaacacacccactaGTTTTTATGTGGGAGTGTTTTAGCaaagctacaccttagggtgtatttaaccactttttagttatttacttgctaaaatactccttctaaaaaataagtgggtgtatcctagcaaatgccTATAGGATTTGCTAGAACACACCCacttgtttttgttagaaggtgtgttatagcaacatacaccttaaggtgtatttattaactttttagttataacttgctaaaacactcccacataaaaactagtgggtgtgttatagcaaat	1	mtr-MIR2604,	mtr-MIR2604	gtttgctagaacacatccacTAATTTTTATGTGGGAGTGTTttagcaaagctataacttagagtgtatttaaccactgtttagttatttatttgctaaaatactccttctaaaaaataagtgggtgtattctagcaaatgcctataagatttgctagaacacacccacttgtttttttagaaagtgtgttatagcaacatacaccttaaggtgtatttattaattttttagttataacttgctaaaacactcccacataaaaactagtgggtgtgttctagaaaatt	mtr-MIR2604-p5	ATTTTTATGTGGGAGTGTTttagc	5'	New	gp1	((((((((.(((((((((((((((((((((((((((((((((((((((...(((((((((((((((((......(((....))).......((((((.(((((.(((((((((((((((((((((((...(((((((((.((....)))))))))))...)))))))))))))))..)))))))).))))).)))))).))))))))))))))))).....(((((....)))))....))))))))))))))))))))))))))))))))))))))).))))))))	287	34.1	-163.8	1.7	91	145	133	147	167	177	106.721	136.107	151.804	149.489	170.19	171.388	middle
159	274	mtr-MIR2604-p3_1ss5AG	TATAGGATTTGCTAGAACACACCC	24	chr3.2	+	87925966	87926252	gtttgctagaacacacccactaGTTTTTATGTGGGAGTGTTTTAGCaaagctacaccttagggtgtatttaaccactttttagttatttacttgctaaaatactccttctaaaaaataagtgggtgtatcctagcaaatgccTATAGGATTTGCTAGAACACACCCacttgtttttgttagaaggtgtgttatagcaacatacaccttaaggtgtatttattaactttttagttataacttgctaaaacactcccacataaaaactagtgggtgtgttatagcaaat	1	mtr-MIR2604,	mtr-MIR2604	gtttgctagaacacatccacTAATTTTTATGTGGGAGTGTTttagcaaagctataacttagagtgtatttaaccactgtttagttatttatttgctaaaatactccttctaaaaaataagtgggtgtattctagcaaatgcctataagatttgctagaacacacccacttgtttttttagaaagtgtgttatagcaacatacaccttaaggtgtatttattaattttttagttataacttgctaaaacactcccacataaaaactagtgggtgtgttctagaaaatt	mtr-MIR2604-p3	tataagatttgctagaacacaccc	3'	New	gp1	((((((((.(((((((((((((((((((((((((((((((((((((((...(((((((((((((((((......(((....))).......((((((.(((((.(((((((((((((((((((((((...(((((((((.((....)))))))))))...)))))))))))))))..)))))))).))))).)))))).))))))))))))))))).....(((((....)))))....))))))))))))))))))))))))))))))))))))))).))))))))	287	34.1	-163.8	1.7	282	590	366	454	436	435	330.717	553.814	417.747	461.687	444.329	421.207	middle
160	275	mtr-MIR2606b-p3_1ss17TC	TTAGTTAAGAACCATACGAAAAGC	24	chr2.2	+	17711326	17711498	aggaaaaaacttaggtacaattctttatgtgctttttgtatggttcttaaataaattcaccatgattttctcaaatctttaactttctcaaagtttgttatatccaaaaaagatgtatttTTAGTTAAGAACCATACGAAAAGCacctaaagaattgtacctaagttttctcc	1	mtr-MIR2606b,	mtr-MIR2606b	aggagaaaacttaggTACAATTCCTTAGGTGCTTTTtgtatggttctttactaaatttaccatgatttcctcaaatgcataattttctcaaagtttgttatatccaaataatatgtatttttagttaagaaccatatgaaaagcacataaggaattgtacctaagttttctcca	mtr-MIR2606b-p3	ttagttaagaaccatatgaaaagc	3'	New	gp1	.(((.((((((((((((((((((((((.((((((((((((((((((((((.((((........(((((....)))))...((((((...))))))...((((((.......))))))..)))).)))))))))))))))))))))).)))))))))))))))))))))).)))	172	27.7	-73	1.5	0	0	5	0	5	0	0	0	5.70692	0	5.09551	0	low
161	276	mtr-MIR2608-p5_1ss17GT	ACAACTTTCTCTCTCATACTCACA	24	chr1.2	-	458412	458608	gagaaatgatatttgtacaaccattttctaacaactttttgACAAATTTCTCTCTCATATTCACAttatcttcttattctctctcttccttttttttttctctctctctctctctattatttttgaccaatcaaaagagagaaaacCAAAGTTGTCATGAAAGTTGTACCaaagagttgtacaaatatcactactct	1	mtr-MIR2608,	mtr-MIR2608	attgcaaagagaaatgatatttgtacaactattttctaacaactttttgacaactttctctctcagactcacattatcttcttattccctctcttcctttttctctctctctctctctctctattatttttgaccaatcaaaagagagaaaaccaaagttgtcatgaaagttgtaccaaagaGTTGTACATATATCACTACTCTattgcaaa	mtr-MIR2608-p5	acaactttctctctcagactcaca	5'	New	gp1	(((...(((((((((((((((..(((....(((((((((((((((...........(((.......)))...................((((...((((((((((................(((((....)))))))))))))))..)))))))))).)))))))))...)))..)))))))))))))))...))).	196	29.9	-46.4	0.8	124	348	207	193	236	263	145.422	326.656	236.267	196.268	240.508	254.661	middle
161	277	mtr-MIR2608-p3	CAAAGTTGTCATGAAAGTTGTACC	24	chr1.2	-	458412	458608	gagaaatgatatttgtacaaccattttctaacaactttttgACAAATTTCTCTCTCATATTCACAttatcttcttattctctctcttccttttttttttctctctctctctctctattatttttgaccaatcaaaagagagaaaacCAAAGTTGTCATGAAAGTTGTACCaaagagttgtacaaatatcactactct	1	mtr-MIR2608,	mtr-MIR2608	attgcaaagagaaatgatatttgtacaactattttctaacaactttttgacaactttctctctcagactcacattatcttcttattccctctcttcctttttctctctctctctctctctctattatttttgaccaatcaaaagagagaaaaccaaagttgtcatgaaagttgtaccaaagaGTTGTACATATATCACTACTCTattgcaaa	mtr-MIR2608-p3	caaagttgtcatgaaagttgtacc	3'	New	gp1	(((...(((((((((((((((..(((....(((((((((((((((...........(((.......)))...................((((...((((((((((................(((((....)))))))))))))))..)))))))))).)))))))))...)))..)))))))))))))))...))).	196	29.9	-46.4	0.8	19	60	35	19	46	56	22.2824	56.32	39.9484	19.3217	46.8787	54.2244	middle
162	278	mtr-MIR2610a-p5_2ss9TA20GT	TTGAGACTAGTATGGCTTCTTT	22	chr4.2	-	69054317	69054721	TTGAGACTTGTATGGCTTCTTTgaaagatgctcagagggtgattcaggaagggaaaaccgaaggctggggtcagttattggagatgactgagaataagtgcaaagaggggattggttttcctaacagtaagcctggggtcttcaaccctaccgaaggtacttttcatagtgctggtttcattcatgctccacctgagaccaatgcaattattgaggatcagtctgaagtggtggcacctgtctttgtgacacctggaggagcctgctgcaattggatcgctgtggacattccttctgcgatacatctctctaagtaatatgtttgtcttgttttttttgttttttctttaagAAAACTCCTTTCGTCTTGCCCCagacgaaagtgaaatcatgtagggc…	2	mtr-MIR2610a,mtr-MIR2610b,	mtr-MIR2610a	aAGATTGAGACTTGTATGGCTTcgttgaaggatgcccggagagtaattcaggaaggcaaaaccgaaggctggggtcagctagtggagttgccagaaaacaagcgtaaggagggaattggtttccttaacagtaagcctgggatgttcgaccctaccagaggttctttccacagtgctggtttcattcatgattcaccagagaccaatgcaattttagatgatgcacctggaggagtgacaccggtctttgtgacgcctggaggagcttgctgcaactggattgctgttgacattccttctgtgacaccctgctctaagtaatgtgtttgtcttgtcttttgttgttttttgtttttaagaaaactcctttcgttctgcccaaggcgaaagtgaaatcat…	mtr-MIR2610a-p5	TTGAGACTTGTATGGCTTcgtt	5'	New	gp1	..((((..(((((.((..((((((..(((.(((((..(((..(((......)))..)))....(((((..((((....(((((((((.(((((...((..(....(((..(.....)..)))...(((..(((((((((.....))))).....))))))).......)..))..))))).)))).))))).))))..)))..)).....))))).)))..)).)))).((((.(((........))).)))).(((((((.(..(.((.........)).)..)...))))))).)).)))))..))))..............((((((...........(((((.....))))).(((((((((((......))))))))).)).......))))))…	308	44	-113.2	0.6	6	11	6	7	0	29	7.03654	10.3253	6.84831	7.11852	0	28.0805	middle
162	279	mtr-MIR2610a-p3_2ss15TC22AC	AAAACTCCTTTCGTCCTGCCCC	22	chr4.2	-	69054317	69054721	TTGAGACTTGTATGGCTTCTTTgaaagatgctcagagggtgattcaggaagggaaaaccgaaggctggggtcagttattggagatgactgagaataagtgcaaagaggggattggttttcctaacagtaagcctggggtcttcaaccctaccgaaggtacttttcatagtgctggtttcattcatgctccacctgagaccaatgcaattattgaggatcagtctgaagtggtggcacctgtctttgtgacacctggaggagcctgctgcaattggatcgctgtggacattccttctgcgatacatctctctaagtaatatgtttgtcttgttttttttgttttttctttaagAAAACTCCTTTCGTCTTGCCCCagacgaaagtgaaatcatgtagggc…	2	mtr-MIR2610a,mtr-MIR2610b,	mtr-MIR2610a	aAGATTGAGACTTGTATGGCTTcgttgaaggatgcccggagagtaattcaggaaggcaaaaccgaaggctggggtcagctagtggagttgccagaaaacaagcgtaaggagggaattggtttccttaacagtaagcctgggatgttcgaccctaccagaggttctttccacagtgctggtttcattcatgattcaccagagaccaatgcaattttagatgatgcacctggaggagtgacaccggtctttgtgacgcctggaggagcttgctgcaactggattgctgttgacattccttctgtgacaccctgctctaagtaatgtgtttgtcttgtcttttgttgttttttgtttttaagaaaactcctttcgttctgcccaaggcgaaagtgaaatcat…	mtr-MIR2610a-p3	aaaactcctttcgttctgccca	3'	New	gp1	..((((..(((((.((..((((((..(((.(((((..(((..(((......)))..)))....(((((..((((....(((((((((.(((((...((..(....(((..(.....)..)))...(((..(((((((((.....))))).....))))))).......)..))..))))).)))).))))).))))..)))..)).....))))).)))..)).)))).((((.(((........))).)))).(((((((.(..(.((.........)).)..)...))))))).)).)))))..))))..............((((((...........(((((.....))))).(((((((((((......))))))))).)).......))))))…	308	44	-113.2	0.6	54	102	21	169	65	116	63.3288	95.744	23.9691	171.861	66.2416	112.322	middle
163	280	mtr-MIR2611-p5	ATCTGAGCAAGAAGTTCACCGACT	24	chr7.3	+	82814197	82814492	tgattatgtatctgtcagtgttagatgattctgtgggttgtgtcctcggtcaacaagacgagactggaaagaaagaacatgctatctactATCTGAGCAAGAAGTTCACCGACTgtgagactcggtatacaatgcttgaaaagacttgttgtgctttagcttgggctgccaaacgcctgcgtcattatatggtgaatcatacaacttggttgatatcccgaATGGATCCAATCAAGTATATCTTTgagaaacctgctgttactggaaagattgcacgttggcaaatgttgttgtct	1	mtr-MIR2611,	mtr-MIR2611	tgattttgTATTTGTCAGTGTTTGATGAAtctgtgggatgcgtgcttggtcaacaagatgagactggaaagaaagaacatgctatctactatctgagcaagaagttcaccgactgtgaaactcggtatacaatgcttgagaagacttgttgtggtctagcttgggctgccaaacgcctgcgtcattatttggtgaatcatacaacttggttgatatccagaatggatccgatcaagtatatctttgagaaagctgctgttactgggaagattgcacgctggcagatgcttttgtct	mtr-MIR2611-p5	atctgagcaagaagttcaccgact	5'	New	gp1	......(((((((.((((((.((((((.....((((((.(..(.((((.((.....)))))).((....)).......)..).))))))))))))((((....((((((((..((((((((..(((((((((..(((...)))..))).)))))).......((((........))))..))).)))))))))))))......(((((((((..((((.....)))).)))))))))................))))..))))))..)))).)))....(((((......))))).	94	41.9	-66.6	0.5	0	9	0	5	0	6	0	8.448	0	5.08465	0	5.80976	low
163	281	mtr-MIR2611-p3_2ss9GA18TC	ATGGATCCAATCAAGTACATCTTT	24	chr7.3	+	82814197	82814492	tgattatgtatctgtcagtgttagatgattctgtgggttgtgtcctcggtcaacaagacgagactggaaagaaagaacatgctatctactATCTGAGCAAGAAGTTCACCGACTgtgagactcggtatacaatgcttgaaaagacttgttgtgctttagcttgggctgccaaacgcctgcgtcattatatggtgaatcatacaacttggttgatatcccgaATGGATCCAATCAAGTATATCTTTgagaaacctgctgttactggaaagattgcacgttggcaaatgttgttgtct	1	mtr-MIR2611,	mtr-MIR2611	tgattttgTATTTGTCAGTGTTTGATGAAtctgtgggatgcgtgcttggtcaacaagatgagactggaaagaaagaacatgctatctactatctgagcaagaagttcaccgactgtgaaactcggtatacaatgcttgagaagacttgttgtggtctagcttgggctgccaaacgcctgcgtcattatttggtgaatcatacaacttggttgatatccagaatggatccgatcaagtatatctttgagaaagctgctgttactgggaagattgcacgctggcagatgcttttgtct	mtr-MIR2611-p3	atggatccgatcaagtatatcttt	3'	New	gp1	......(((((((.((((((.((((((.....((((((.(..(.((((.((.....)))))).((....)).......)..).))))))))))))((((....((((((((..((((((((..(((((((((..(((...)))..))).)))))).......((((........))))..))).)))))))))))))......(((((((((..((((.....)))).)))))))))................))))..))))))..)))).)))....(((((......))))).	94	41.9	-66.6	0.5	0	6	0	0	0	0	0	5.632	0	0	0	0	low
164	282	mtr-MIR2614-p5_1ss9GC	AAATGAGTCGAGTCGAACCGAACC	24	chr1.1	-	67838641	67838802	tggAAATGAGTCGAGTCGAACCGAACCtgtctgagctcgactcgactcgataagaatttgctcggctcgaaactcgactcgagttcgacacgaactcttttttcagctcgagttcgactcgtttaaagttcacgaACAGTTCGGTTCGGCTCGTTAGGTtca	1	mtr-MIR2614,	mtr-MIR2614	tggaaatgagtggagtcgaaccgaacctgtctgagctcggctcgactagataagaatttgttcggctcaaaactcgactcgagttcgacacgaactttttttcagctcgaattcgacttgtttaaagttcacgaatagttCGGTTCGACTCGTTAGGTTCa	mtr-MIR2614-p5	aaatgagtggagtcgaaccgaacc	5'	New	gp1	.(((..(((..(((((((((((((((.(((((((((((((.(((((((((.(((((.....(((..(((((.((((...)))))))))..))).....)))))....))))).)))).))).....)))))).).)))))))))))))))))))))..))).	160	48.8	-63.4	0.8	34	60	45	103	64	88	39.8737	56.32	51.3623	104.744	65.2225	85.2097	middle
164	283	mtr-MIR2614-p3_1ss14AG	ATAGTTCGGTTCGGCTCGTTAGGT	24	chr1.1	-	67838641	67838802	tggAAATGAGTCGAGTCGAACCGAACCtgtctgagctcgactcgactcgataagaatttgctcggctcgaaactcgactcgagttcgacacgaactcttttttcagctcgagttcgactcgtttaaagttcacgaACAGTTCGGTTCGGCTCGTTAGGTtca	1	mtr-MIR2614,	mtr-MIR2614	tggaaatgagtggagtcgaaccgaacctgtctgagctcggctcgactagataagaatttgttcggctcaaaactcgactcgagttcgacacgaactttttttcagctcgaattcgacttgtttaaagttcacgaatagttCGGTTCGACTCGTTAGGTTCa	mtr-MIR2614-p3	atagttCGGTTCGACTCGTTAGGT	3'	New	gp1	.(((..(((..(((((((((((((((.(((((((((((((.(((((((((.(((((.....(((..(((((.((((...)))))))))..))).....)))))....))))).)))).))).....)))))).).)))))))))))))))))))))..))).	160	48.8	-63.4	0.8	0	5	7	24	0	12	0	4.69334	7.98969	24.4063	0	11.6195	middle
165	284	mtr-MIR2619b-p3_1ss15TA	TGCCACGTCAGCGTAGACCGAGTC	24	chr8.4	+	39949640	39949805	aaacagccccctaagtattgaatctttggcaactttgtcccccaaggccaaaaaaataaaaaaaatgacacgtggcacctcacttatggTGCCACGTCAGCGTTGACCGAGTCaaaatcggcattgggggcaaaaaactgccaaagattcaatacttagggggctg	1	mtr-MIR2619b,	mtr-MIR2619b	aaacagccccATATGTTTTGATTCTTTGGCAgttttggccccccaaggcaaaataaaaataaaaaatttgacacatggcacctcacttagggtgccacgtcagcgttgaccgagtcaacactgaactgggggttcaaaactgCCAAAGAATCAATACATAGGGggctgatt	mtr-MIR2619b-p3	tgccacgtcagcgttgaccgagtc	3'	New	gp1	...((((((((((((((((((((((((((((..((((.(((((((.(((....................((((((((((........)))))))))).....(((((...)))))....))).)))))))))))....))))))))))))))))))))))))))))	28	45.8	-96.8	1.3	141	257	160.5	264	220	346	165.359	241.237	183.192	268.47	224.202	335.029	middle
166	285	mtr-MIR2619a-p5_1ss22AG	TATTGGATCTTTGACAGTTTTGGC	24	chr7.2	+	20709227	20709468	gccccctaactaattaaaatacaaaacagcccctatgTATTGGATCTTTGGCATTTTTGGCccccaagaccacttttgaattagtcttcgctgacgtgacacccacaatggtcgacacgtggcacctcacttaagggacgtgggtgtcacgtcagcgaagactaagtcaaaagtggccttgggggccaaaactgccaaagatccaatacaTAGGGGGCTGTTTTGTATTTTaattagttagg	1	mtr-MIR2619a,	mtr-MIR2619a	agccccctaactaattaaaatacaaaacaatcccctatgtattggatctttgacagttttagctcccaagaccacttttgatttagtctttgttgacgtggcacccacaatggtcgaaacgtgatacctcgcttaagggatgtgggtgccacgtcagcgaagattaagtcaaaagtggttttggaggccaaaactgccaaagatccaatACATAGGAGGCTGTTTTGTATtttaatttgttaggatgtc	mtr-MIR2619a-p5	tattggatctttgacagttttagc	5'	New	gp1	....(((((((((((((((((((((((((((((((((((((((((((((((((.((((((((((((((.((((((((((.((((((((((((((((((((((((((....((((.....)))).(((......)))...)))))))))))))))))))))))))).)))))))))).)))))))))))))).)))))))))))))))))))).)))))))))))))))))))))))))))))	238	46.3	-182.6	1.6	7	14	6	15	11	8	8.2093	13.1413	6.84831	15.254	11.2101	7.74634	middle
166	286	mtr-MIR2619a-p3_2ss5AG21TA	TAGGGGGCTGTTTTGTATTTA	21	chr7.2	+	20709227	20709468	gccccctaactaattaaaatacaaaacagcccctatgTATTGGATCTTTGGCATTTTTGGCccccaagaccacttttgaattagtcttcgctgacgtgacacccacaatggtcgacacgtggcacctcacttaagggacgtgggtgtcacgtcagcgaagactaagtcaaaagtggccttgggggccaaaactgccaaagatccaatacaTAGGGGGCTGTTTTGTATTTTaattagttagg	1	mtr-MIR2619a,	mtr-MIR2619a	agccccctaactaattaaaatacaaaacaatcccctatgtattggatctttgacagttttagctcccaagaccacttttgatttagtctttgttgacgtggcacccacaatggtcgaaacgtgatacctcgcttaagggatgtgggtgccacgtcagcgaagattaagtcaaaagtggttttggaggccaaaactgccaaagatccaatACATAGGAGGCTGTTTTGTATtttaatttgttaggatgtc	mtr-MIR2619a-p3	TAGGAGGCTGTTTTGTATttt	3'	New	gp1	....(((((((((((((((((((((((((((((((((((((((((((((((((.((((((((((((((.((((((((((.((((((((((((((((((((((((((....((((.....)))).(((......)))...)))))))))))))))))))))))))).)))))))))).)))))))))))))).)))))))))))))))))))).)))))))))))))))))))))))))))))	238	46.3	-182.6	1.6	0	8	11.5	3	0	0	0	7.50934	13.1259	3.05079	0	0	middle
167	287	mtr-MIR2620-p5_2ss8GA20CT	GTATTGTAGGGAATGTGACTGC	22	chr4.1	+	44098825	44099032	gaccaggcttatgtggactatgatgtaactttgggtcagtttgagaGTATTGTAGGGAATGTGACTGCttgcaacaatttgagttttagtgatgaagacctcccgacgaaggggaaaaatcataacttggcattacttatctctgtcctttgcaaatcagactctctgtctaatgttctaatagatactagttctgctcttaacgtaa	1	mtr-MIR2620,	mtr-MIR2620	tactagaccaggcttttgtggattatgatgtgactttgggccagtttgaaagtattgtggggaatgtgaccgcatgtaacagtctgagttttagtgatgaagacctcccagcggaggggaagaagcacaatcaggcgttactcatctctgtactttgcagaacagactccttatccaatgTTCTGATAGACACCGGCTCTGCtcttaatgtaa	mtr-MIR2620-p5	gtattgtggggaatgtgaccgc	5'	New	gp1	(((((((.(((..(........)..))))))..))))...(((((((((...((((((..((..(((.((((((......(((....(((((((......((((......))))......((.....)).)))))))...)))......))))))..))))))))))).(((.((((......)))).)))...))))))))).....	116	39.4	-42.6	0.5	47	58	53	86	70	124	55.1196	54.4427	60.4934	87.456	71.3371	120.068	middle
168	288	mtr-MIR2629b-p5_1ss23TC	TTTCCTCGGTAGTTAACTGCAGCC	24	chr2.1	-	5389848	5389908	aagtTTTCCTCGGTAGTTAACTGCAGTCGGTTTCATAATTCGGCAGTTAACTgccgagggg	2	mtr-MIR2629b,mtr-MIR2629c,	mtr-MIR2629b	aAGTTTTCCTCGGTAGTTAACTgcagtcggttccataattcggcagttaactgccgagggg	mtr-MIR2629b-p5	TTTCCTCGGTAGTTAACTgcagtc	5'	New	gp1	......((((((((((((((((((...(((.........))))))))))))))))))))).	54	47.5	-31.4	1.1	147	260.333	180	272.833	227.333	261.833	172.395	244.366	205.449	277.453	231.676	253.531	middle
168	289	mtr-MIR2629b-p3_1ss5CT	GGTTTCATAATTCGGCAGTTAACT	24	chr2.1	-	5389848	5389908	aagtTTTCCTCGGTAGTTAACTGCAGTCGGTTTCATAATTCGGCAGTTAACTgccgagggg	2	mtr-MIR2629b,mtr-MIR2629c,	mtr-MIR2629b	aAGTTTTCCTCGGTAGTTAACTgcagtcggttccataattcggcagttaactgccgagggg	mtr-MIR2629b-p3	ggttccataattcggcagttaact	3'	New	gp1	......((((((((((((((((((...(((.........))))))))))))))))))))).	54	47.5	-31.4	1.1	17	22	8.5	12.5	25.5	18	19.9369	20.6507	9.70177	12.7116	25.9871	17.4293	middle
169	290	mtr-MIR2629a-p5_1ss24TC	TTTCCTCGGTAGTTAACTGCAGCC	24	chr1.3	+	76119561	76119618	agtTTTCCTCGGTAGTTAACTGCAGCTGGTTTCATAATTCGGCAGTTAACTgccgagg	1	mtr-MIR2629a,	mtr-MIR2629a	cAGTTTTCCTCGGTAGTTAACTgcagctggttccataattcggcagttaactgccgagg	mtr-MIR2629a-p5	TTTCCTCGGTAGTTAACTgcagct	5'	New	gp1	......(((((((((((((((((.....(((....)))...)))))))))))))))))	52	46.6	-28.9	1.1	147	260.333	180	272.833	227.333	261.833	172.395	244.366	205.449	277.453	231.676	253.531	middle
169	291	mtr-MIR2629a-p3_1ss5CT	GGTTTCATAATTCGGCAGTTAACT	24	chr1.3	+	76119561	76119618	agtTTTCCTCGGTAGTTAACTGCAGCTGGTTTCATAATTCGGCAGTTAACTgccgagg	1	mtr-MIR2629a,	mtr-MIR2629a	cAGTTTTCCTCGGTAGTTAACTgcagctggttccataattcggcagttaactgccgagg	mtr-MIR2629a-p3	ggttccataattcggcagttaact	3'	New	gp1	......(((((((((((((((((.....(((....)))...)))))))))))))))))	52	46.6	-28.9	1.1	17	22	8.5	12.5	25.5	18	19.9369	20.6507	9.70177	12.7116	25.9871	17.4293	middle
170	292	mtr-MIR2629e-p5_1ss23TC	TTTCCTCGGTAGTTAACTGCAGCC	24	chr1.4	+	85280981	85281083	gcagttaactgccgaggtTTTCCTCGGTAGTTAACTGCAGCCggttccaatcaaattcgacagttaactgccgatgggcatttgagtaatttacatgtgtttt	1	mtr-MIR2629e,	mtr-MIR2629e	aagatgcagttaattgcggaAGTTTTCCTCGGTAGTTAACTgcagtcagttccaataaaattcgacagttagctgccgagggacatttgaataatttatatgtattttg	mtr-MIR2629e-p5	TTTCCTCGGTAGTTAACTgcagtc	5'	New	gp1	(((((((((((((((((....))))))))))))))))).((((((....)))....(((.(((....))).)))..)))........................	38	43.7	-40.1	0.9	147	260.333	180	272.833	227.333	261.833	172.395	244.366	205.449	277.453	231.676	253.531	middle
171	293	mtr-MIR2630q-p5	TTTGGTCCTTGGTATTTTGTT	21	chr1.1	+	23367252	23367479	ccatgcaaatatagaatatttggtTTTGGTCCTTGGTATTTTGTTttaatccttgtaaaatcatttcatattgaaattggtccctataatattcattttagtcctcattttgagggactaaaatcaaatattctacatattacaaggaccaaatccaatatgaatcaattTTACAAGGACTAAAACAAAATACCaaggaacaaaaccaaattttttatatttgcaggg	4	mtr-MIR2630q,mtr-MIR2630d,mtr-MIR2630u,mtr-MIR2630c,	mtr-MIR2630q	ccatgcaaatatataatattTGGTTTTGGTCCTTGGTATTTtgttttaatccttgtaaaatcatttcatattgaaattggtccctataatattcattttagtcctcgttttgagggactaaaatcaaatattctacatattacaaggaccaaatccaatatgaatcaattttacaaggactaaaacaaaataccaaggaccaaaaccaaattttttatatttgcaggg	mtr-MIR2630q-p5	TTTGGTCCTTGGTATTTtgtt	5'	New	gp1	((.(((((((((((((.(((((((((((.(((((((((((((((((((.((((((((((((...(((((((((...(((((((...........((((((((((((.....)).))))))))))..(((((.....)))))....)))))))...)))))))))...)))))))))))).))))))))))))))))))).))))))))))).))))))))))))))).	227	28.1	-107.3	1.7	0.533333	0.416667	0	0.75	0	0	0.62547	0.391111	0	0.762698	0	0	low
171	294	mtr-MIR2630q-p3	TTACAAGGACTAAAACAAAATACC	24	chr1.1	+	23367252	23367479	ccatgcaaatatagaatatttggtTTTGGTCCTTGGTATTTTGTTttaatccttgtaaaatcatttcatattgaaattggtccctataatattcattttagtcctcattttgagggactaaaatcaaatattctacatattacaaggaccaaatccaatatgaatcaattTTACAAGGACTAAAACAAAATACCaaggaacaaaaccaaattttttatatttgcaggg	4	mtr-MIR2630q,mtr-MIR2630d,mtr-MIR2630u,mtr-MIR2630c,	mtr-MIR2630q	ccatgcaaatatataatattTGGTTTTGGTCCTTGGTATTTtgttttaatccttgtaaaatcatttcatattgaaattggtccctataatattcattttagtcctcgttttgagggactaaaatcaaatattctacatattacaaggaccaaatccaatatgaatcaattttacaaggactaaaacaaaataccaaggaccaaaaccaaattttttatatttgcaggg	mtr-MIR2630q-p3	ttacaaggactaaaacaaaatacc	3'	New	gp1	((.(((((((((((((.(((((((((((.(((((((((((((((((((.((((((((((((...(((((((((...(((((((...........((((((((((((.....)).))))))))))..(((((.....)))))....)))))))...)))))))))...)))))))))))).))))))))))))))))))).))))))))))).))))))))))))))).	227	28.1	-107.3	1.7	17.0762	43.1639	15.9333	16.719	23.8841	15.8667	20.0262	40.5165	18.1861	17.0021	24.3404	15.3636	middle
172	295	mtr-MIR2630x-p5_1ss18AT	TTTGATTTTAGTCCCTCTAAA	21	chr5.1	-	70442543	70442769	ccctgcaaatataaaaaaattggttttggtccttggtattttgttttagtccttgtaaaattgattcatattggatttggtccttgtaatatgtagaataTTTGATTTTAGTCCCTCAAAAtgAGGACTAAAATGAATATTATAGGGaccaatttcaatatgaaatgattttacaaggattaaaacaaaataccaaggaccaaaaccaaatattctatatttgcagg	1	mtr-MIR2630x,	mtr-MIR2630x	ccctgcaaatataaaaaaatTGGTTTTGGTCCTTGGTATTTtgttttagtccttgtaaaattgattcatattggatttggtctttgtaatatgtagaatatttgattttagtccctcaaaatgaggactaaaatgaatattatagggaccaatttcaatatgaaatgattttacaaggatcaaaacaaaataccaaggaccaaaaccaaatattctatatttgcagga	mtr-MIR2630x-p5	tttgattttagtccctcaaaa	5'	New	gp1	.((((((((((((......(((((((((((((((((((((((((((((((((((((((((((..(((((((((((.((((((((((((((((..........(.((((((((((.((.....)))))))))))).))))))))))))))))).)))))))))))..)))))))))))))))))))))))))))))))))))))))))))......))))))))))))	226	28.6	-128.5	2	0.533333	6.66667	2.5	1.66667	2.5	4	0.62547	6.25778	2.85346	1.69488	2.54776	3.87317	low
172	296	mtr-MIR2630x-p3	AGGACTAAAATGAATATTATAGGG	24	chr5.1	-	70442543	70442769	ccctgcaaatataaaaaaattggttttggtccttggtattttgttttagtccttgtaaaattgattcatattggatttggtccttgtaatatgtagaataTTTGATTTTAGTCCCTCAAAAtgAGGACTAAAATGAATATTATAGGGaccaatttcaatatgaaatgattttacaaggattaaaacaaaataccaaggaccaaaaccaaatattctatatttgcagg	1	mtr-MIR2630x,	mtr-MIR2630x	ccctgcaaatataaaaaaatTGGTTTTGGTCCTTGGTATTTtgttttagtccttgtaaaattgattcatattggatttggtctttgtaatatgtagaatatttgattttagtccctcaaaatgaggactaaaatgaatattatagggaccaatttcaatatgaaatgattttacaaggatcaaaacaaaataccaaggaccaaaaccaaatattctatatttgcagga	mtr-MIR2630x-p3	aggactaaaatgaatattataggg	3'	New	gp1	.((((((((((((......(((((((((((((((((((((((((((((((((((((((((((..(((((((((((.((((((((((((((((..........(.((((((((((.((.....)))))))))))).))))))))))))))))).)))))))))))..)))))))))))))))))))))))))))))))))))))))))))......))))))))))))	226	28.6	-128.5	2	9.66667	50	24.6667	25.8333	33.5	33.8333	11.3366	46.9334	28.1541	26.2707	34.1399	32.7606	middle
173	297	mtr-MIR2630p-p5	TTTGGTCCTTGGTATTTTGTT	21	chr7.2	-	79961083	79961311	ccctgcaaatatagaatatttggtTTTGGTCATTGGTATTTTGTTttaatccttgtaaaatcatttcatattgaaattgatccctataatattcattttagtcctcattttgagggactaaaatcaaatattctacatattacaaagaccaaatccaatatgaatcaattTTACAAGGACTAAAACAAAATACCaaggaccaaaaccaaattttttatatttgcatgga	1	mtr-MIR2630p,	mtr-MIR2630p	ccctgcaaatatagaatattTGGTTTTGGTCCTTGGTATTTtgttttaatccttgtaaaatcatttcatattgaaattggtccctataatattcattttagtcctcattttgagggactaaaataaaatattctacatattacaaggaccaaatccaatatgatccaattttacaaggactaaaacaaaataccaatgaccaaaaaccaaattttttatatttgcttgga	mtr-MIR2630p-p5	TTTGGTCCTTGGTATTTtgtt	5'	New	gp1	((.(((((((((((((.((((((((((((((.((((((((((((((((.((((((((((((...(((((((((...(((.((............((((((((((((.....)).))))))))))..(((((.....))))).....)).)))...)))))))))...)))))))))))).)))))))))))))))).)))))))))))))).))))))))))))).)).	228	27.1	-97.9	1.6	0.533333	0.416667	0	0.75	0	0	0.62547	0.391111	0	0.762698	0	0	low
173	298	mtr-MIR2630p-p3	TTACAAGGACTAAAACAAAATACC	24	chr7.2	-	79961083	79961311	ccctgcaaatatagaatatttggtTTTGGTCATTGGTATTTTGTTttaatccttgtaaaatcatttcatattgaaattgatccctataatattcattttagtcctcattttgagggactaaaatcaaatattctacatattacaaagaccaaatccaatatgaatcaattTTACAAGGACTAAAACAAAATACCaaggaccaaaaccaaattttttatatttgcatgga	1	mtr-MIR2630p,	mtr-MIR2630p	ccctgcaaatatagaatattTGGTTTTGGTCCTTGGTATTTtgttttaatccttgtaaaatcatttcatattgaaattggtccctataatattcattttagtcctcattttgagggactaaaataaaatattctacatattacaaggaccaaatccaatatgatccaattttacaaggactaaaacaaaataccaatgaccaaaaaccaaattttttatatttgcttgga	mtr-MIR2630p-p3	ttacaaggactaaaacaaaatacc	3'	New	gp1	((.(((((((((((((.((((((((((((((.((((((((((((((((.((((((((((((...(((((((((...(((.((............((((((((((((.....)).))))))))))..(((((.....))))).....)).)))...)))))))))...)))))))))))).)))))))))))))))).)))))))))))))).))))))))))))).)).	228	27.1	-97.9	1.6	17.0762	43.1639	15.9333	16.719	23.8841	15.8667	20.0262	40.5165	18.1861	17.0021	24.3404	15.3636	middle
174	299	mtr-MIR2630j-p5	TTTGGTCCTTGGTATTTTGTT	21	chr4.2	+	34573065	34573293	ccctgcaaatatagaatatttggtTTTGGTCCTTGGTATTTTGTTttaatccttgtaaaatcatttcatattgaaattggctcctataatattcattttagtcctcattttgagggactaaaatcaaatattctacatattacAAGGACCAAATCCAATATGAATCAattttacaaggactaaaacaaaataccaaggaccaaaatcaaattttttatatttgcaagga	2	mtr-MIR2630j,mtr-MIR2630k,	mtr-MIR2630j	ccctgcaaatataaaatattTGGTTTTGGTCCTTGGTATTTtgttttaatccttgtaaaatcatttcatattgaaattggtccctataatattcattttagtcctcattttgagggactaaaatcaaatattctacatattacaaggaccaaatccaatatgaatcaattttacaaagactaaaacaaaataccgaggaccaaaatcaaattttttatatttgtaagga	mtr-MIR2630j-p5	TTTGGTCCTTGGTATTTtgtt	5'	New	gp1	((.(((((((((((((.(((((((((((((((((((((((((((((((.((((((((((((...(((((((((...((((.((((.........((((((((((((.....)).))))))))))..(((((.....)))))...))))))))...)))))))))...)))))))))))).))))))))))))))))))))))))))))))).))))))))))))).)).	228	27.9	-109.5	1.7	0.533333	0.416667	0	0.75	0	0	0.62547	0.391111	0	0.762698	0	0	low
174	300	mtr-MIR2630j-p3	AAGGACCAAATCCAATATGAATCA	24	chr4.2	+	34573065	34573293	ccctgcaaatatagaatatttggtTTTGGTCCTTGGTATTTTGTTttaatccttgtaaaatcatttcatattgaaattggctcctataatattcattttagtcctcattttgagggactaaaatcaaatattctacatattacAAGGACCAAATCCAATATGAATCAattttacaaggactaaaacaaaataccaaggaccaaaatcaaattttttatatttgcaagga	2	mtr-MIR2630j,mtr-MIR2630k,	mtr-MIR2630j	ccctgcaaatataaaatattTGGTTTTGGTCCTTGGTATTTtgttttaatccttgtaaaatcatttcatattgaaattggtccctataatattcattttagtcctcattttgagggactaaaatcaaatattctacatattacaaggaccaaatccaatatgaatcaattttacaaagactaaaacaaaataccgaggaccaaaatcaaattttttatatttgtaagga	mtr-MIR2630j-p3	aaggaccaaatccaatatgaatca	3'	New	gp1	((.(((((((((((((.(((((((((((((((((((((((((((((((.((((((((((((...(((((((((...((((.((((.........((((((((((((.....)).))))))))))..(((((.....)))))...))))))))...)))))))))...)))))))))))).))))))))))))))))))))))))))))))).))))))))))))).)).	228	27.9	-109.5	1.7	2.14286	3.95556	0	1.31429	3.58413	2.46667	2.51305	3.71295	0	1.33654	3.65259	2.38846	low
175	301	mtr-MIR2630i-p5	TTTGGTCCTTGGTATTTTGTT	21	chr6.1	+	73551497	73551723	ccctgcaaatatagaatatttggtTTTGGTCCTTGGTATTTTGTTttaatccttgtaaaatcatttcatattgaaattggtccctataatattcattttagtcctcattttgagggactaaaatcaaatattctacatactacaaggaccaaatccaatatgaatcaattTTACAAGGACTAAAACAAAATACCaaggaccaaaaccaaattttttatatttgcagg	1	mtr-MIR2630i,	mtr-MIR2630i	ccctgcaaatatagaatattTGGTTTTGGTCCTTGGTATTTtgttttaatccttgtaaaatcatttcatattgaaattggtccatataatattcattttagtcctcatattgagggtctaaaatcaaatattctacatactacaagaacaaaatccaatatgaatcaattttacaaggactaaaacaaaataccaaggaccaaaaccaaatttttaatatttgcagga	mtr-MIR2630i-p5	TTTGGTCCTTGGTATTTtgtt	5'	New	gp1	.(((((((((((((((.(((((((((((((((((((((((((((((((.((((((((((((...(((((((((...(((((((.((.((((((.((((((((((((.....)).))))))))))..)))))).))..........)))))))...)))))))))...)))))))))))).))))))))))))))))))))))))))))))).)))))))))))))))	226	29.1	-115.7	1.8	0.533333	0.416667	0	0.75	0	0	0.62547	0.391111	0	0.762698	0	0	low
175	302	mtr-MIR2630i-p3	TTACAAGGACTAAAACAAAATACC	24	chr6.1	+	73551497	73551723	ccctgcaaatatagaatatttggtTTTGGTCCTTGGTATTTTGTTttaatccttgtaaaatcatttcatattgaaattggtccctataatattcattttagtcctcattttgagggactaaaatcaaatattctacatactacaaggaccaaatccaatatgaatcaattTTACAAGGACTAAAACAAAATACCaaggaccaaaaccaaattttttatatttgcagg	1	mtr-MIR2630i,	mtr-MIR2630i	ccctgcaaatatagaatattTGGTTTTGGTCCTTGGTATTTtgttttaatccttgtaaaatcatttcatattgaaattggtccatataatattcattttagtcctcatattgagggtctaaaatcaaatattctacatactacaagaacaaaatccaatatgaatcaattttacaaggactaaaacaaaataccaaggaccaaaaccaaatttttaatatttgcagga	mtr-MIR2630i-p3	ttacaaggactaaaacaaaatacc	3'	New	gp1	.(((((((((((((((.(((((((((((((((((((((((((((((((.((((((((((((...(((((((((...(((((((.((.((((((.((((((((((((.....)).))))))))))..)))))).))..........)))))))...)))))))))...)))))))))))).))))))))))))))))))))))))))))))).)))))))))))))))	226	29.1	-115.7	1.8	17.0762	43.1639	15.9333	16.719	23.8841	15.8667	20.0262	40.5165	18.1861	17.0021	24.3404	15.3636	middle
176	303	mtr-MIR2630n-p5	TTTGGTCCTTGGTATTTTGTT	21	chr4.1	-	88521870	88522098	ccctgcaaatatagaatatttggtTTTGGTCCTTGGTATTTTGTTttaatccttgtaaaatcatttcatattgaaattggtccctataatattcattttagtcctcattttgagggactaaaatcaaatattctacatattacaaggaccaaatccaatatgaatcaattTTACAAGGACTAAAACAAAATACCaaagaccaaaaccaaattttttatatttgcaggga	1	mtr-MIR2630n,	mtr-MIR2630n	ccctgcaaatatagaatattTGGTTTTGGTCCTTGGTATTTtgttttaatccttgtaaaatcatttcatattgaaatcggtccctataatattcattttagtcctcattttgaatgactaaaatcaaatattctacatattacaaggaccaaatccaatatgaatcaattttacaaggactaaaacaaaataccaaagaccaaaaccaaatattttatatttgcaggga	mtr-MIR2630n-p5	TTTGGTCCTTGGTATTTtgtt	5'	New	gp1	((((((((((((((((.((((((((((((((.((((((((((((((((.((((((((((((...(((((((((...(((((((...........((((((((((((.....)).))))))))))..(((((.....)))))....)))))))...)))))))))...)))))))))))).)))))))))))))))).)))))))))))))).)))))))))))))))).	228	28.4	-114.3	1.8	0.533333	0.416667	0	0.75	0	0	0.62547	0.391111	0	0.762698	0	0	low
176	304	mtr-MIR2630n-p3	TTACAAGGACTAAAACAAAATACC	24	chr4.1	-	88521870	88522098	ccctgcaaatatagaatatttggtTTTGGTCCTTGGTATTTTGTTttaatccttgtaaaatcatttcatattgaaattggtccctataatattcattttagtcctcattttgagggactaaaatcaaatattctacatattacaaggaccaaatccaatatgaatcaattTTACAAGGACTAAAACAAAATACCaaagaccaaaaccaaattttttatatttgcaggga	1	mtr-MIR2630n,	mtr-MIR2630n	ccctgcaaatatagaatattTGGTTTTGGTCCTTGGTATTTtgttttaatccttgtaaaatcatttcatattgaaatcggtccctataatattcattttagtcctcattttgaatgactaaaatcaaatattctacatattacaaggaccaaatccaatatgaatcaattttacaaggactaaaacaaaataccaaagaccaaaaccaaatattttatatttgcaggga	mtr-MIR2630n-p3	ttacaaggactaaaacaaaatacc	3'	New	gp1	((((((((((((((((.((((((((((((((.((((((((((((((((.((((((((((((...(((((((((...(((((((...........((((((((((((.....)).))))))))))..(((((.....)))))....)))))))...)))))))))...)))))))))))).)))))))))))))))).)))))))))))))).)))))))))))))))).	228	28.4	-114.3	1.8	17.0762	43.1639	15.9333	16.719	23.8841	15.8667	20.0262	40.5165	18.1861	17.0021	24.3404	15.3636	middle
177	305	mtr-MIR2630a-p5	TTTGGTCCTTGGTATTTTGTT	21	chr1.4	+	77691300	77691529	ccctgcaaatatagaatatttggtTTTGGTCCTTGGTATTTTGTTttaatccttgtaaaatcatttcatattgaaattggtccctataatattcattttagtcctcattttgagggactaaaatcaaatattctacatattacaaggaccaaatccaatatgaatcaattTTACAAGGACTAAAACAAAATACCaaggaccaaaaccaaattttttatatttgcagggac	5	mtr-MIR2630a,mtr-MIR2630v,mtr-MIR2630m,mtr-MIR2630h,mtr-MIR2630t,	mtr-MIR2630a	ccctgcaaatatagaatattTGGTTTTGGTCCTTGGTATTTtgttttaatccttgtaaaatcatttcatattgaaattggtccctataatattcattttagtcatcattttgagggactaaaatcaaatattctacatattacaaggaccaaatccaatatgaatcaattttacaaggactaaaacaaaatacgaaggaccaaaaccaaattttttatatttgcaggga	mtr-MIR2630a-p5	TTTGGTCCTTGGTATTTtgtt	5'	New	gp1	((((((((((((((((.(((((((((((((((((((((((((((((((.((((((((((((...(((((((((...(((((((...........((((((((((((.....)).))))))))))..(((((.....)))))....)))))))...)))))))))...)))))))))))).))))))))))))))))))))))))))))))).))))))))))))))))..	228	29.1	-120.8	1.8	0.533333	0.416667	0	0.75	0	0	0.62547	0.391111	0	0.762698	0	0	low
177	306	mtr-MIR2630v-p3	TTACAAGGACTAAAACAAAATACC	24	chr1.4	+	77691300	77691529	ccctgcaaatatagaatatttggtTTTGGTCCTTGGTATTTTGTTttaatccttgtaaaatcatttcatattgaaattggtccctataatattcattttagtcctcattttgagggactaaaatcaaatattctacatattacaaggaccaaatccaatatgaatcaattTTACAAGGACTAAAACAAAATACCaaggaccaaaaccaaattttttatatttgcagggac	5	mtr-MIR2630a,mtr-MIR2630v,mtr-MIR2630m,mtr-MIR2630h,mtr-MIR2630t,	mtr-MIR2630v	ccctacaaatatagaatattTGGTTTTGGTCCTTGGTATTTtgttttaatcattgtaaaatcatttcatattgaaattggtccctataatattcattttagtcctcattttgagggactaaaatcaaatattctacatattacaaggaccaaatccaatatgaatcaattttacaaggactaaaacaaaataccaaggaccataaccaaattttttatatttgcatggc	mtr-MIR2630v-p3	ttacaaggactaaaacaaaatacc	3'	New	gp1	((((((((((((((((.(((((((((((((((((((((((((((((((.((((((((((((...(((((((((...(((((((...........((((((((((((.....)).))))))))))..(((((.....)))))....)))))))...)))))))))...)))))))))))).))))))))))))))))))))))))))))))).))))))))))))))))..	228	29.1	-120.8	1.8	17.0762	43.1639	15.9333	16.719	23.8841	15.8667	20.0262	40.5165	18.1861	17.0021	24.3404	15.3636	middle
178	307	mtr-MIR2630g-p5	TTTGGTCCTTGGTATTTTGTT	21	chr8.1	-	44334345	44334573	ccctgcaaatatagaatatttggtTTTGGTCCTTGGTATTTTGTTttaatccttgtaaaatcatttcatattgaaattggtccctataatattcattttagtcctcattttgagggactaaaatcaaatattctacatattacAAGGACCAAATCCAATATGAATCAattttacaaggactaaaataaaataccaaggaccaaaaccaaattttttatatttgcaggga	1	mtr-MIR2630g,	mtr-MIR2630g	ccctgcaaatatagaatattTGGTTTTGGTCCTTGGTATTTtgtttcaatccttgtaaaatcatttcatattgaaattggtccctataatattcattttagtcctcattttgagggacaaaaatcaaatattttacatattacaaggaccaaatccaatatgaatcaatttttcaaagactaaaataaaatacagaggaccaaaaccaaattttttatatttgcaggga	mtr-MIR2630g-p5	TTTGGTCCTTGGTATTTtgtt	5'	New	gp1	((((((((((((((((.(((((((((((((((((((((((((((((((.((((((((((((...(((((((((...(((((((...........((((((((((((.....)).))))))))))..(((((.....)))))....)))))))...)))))))))...)))))))))))).))))))))))))))))))))))))))))))).)))))))))))))))).	228	28.4	-118.9	1.8	0.533333	0.416667	0	0.75	0	0	0.62547	0.391111	0	0.762698	0	0	low
178	308	mtr-MIR2630g-p3	AAGGACCAAATCCAATATGAATCA	24	chr8.1	-	44334345	44334573	ccctgcaaatatagaatatttggtTTTGGTCCTTGGTATTTTGTTttaatccttgtaaaatcatttcatattgaaattggtccctataatattcattttagtcctcattttgagggactaaaatcaaatattctacatattacAAGGACCAAATCCAATATGAATCAattttacaaggactaaaataaaataccaaggaccaaaaccaaattttttatatttgcaggga	1	mtr-MIR2630g,	mtr-MIR2630g	ccctgcaaatatagaatattTGGTTTTGGTCCTTGGTATTTtgtttcaatccttgtaaaatcatttcatattgaaattggtccctataatattcattttagtcctcattttgagggacaaaaatcaaatattttacatattacaaggaccaaatccaatatgaatcaatttttcaaagactaaaataaaatacagaggaccaaaaccaaattttttatatttgcaggga	mtr-MIR2630g-p3	aaggaccaaatccaatatgaatca	3'	New	gp1	((((((((((((((((.(((((((((((((((((((((((((((((((.((((((((((((...(((((((((...(((((((...........((((((((((((.....)).))))))))))..(((((.....)))))....)))))))...)))))))))...)))))))))))).))))))))))))))))))))))))))))))).)))))))))))))))).	228	28.4	-118.9	1.8	2.14286	3.95556	0	1.31429	3.58413	2.46667	2.51305	3.71295	0	1.33654	3.65259	2.38846	low
179	309	mtr-MIR2630e-p5	TTTGGTCCTTGGTATTTTGTT	21	chr1.3	-	49160942	49161170	ccctgcaaatatagaatatttggtTTTGGTCCTTGGTATTTTGTTttaatccttgtaaaatcatttcatattgaaattggtccctataatattcattttagtcctcattttgagggactaaaatcAAATATTCTACATATTACAAGGACcaaatccaatatgaatcaattttacaaggactaaaataaaatatcaaggaccaaaaccaaattttttatatttgcaagga	2	mtr-MIR2630e,mtr-MIR2630f,	mtr-MIR2630e	ccctgcaaatatataatattTGGTTTTGGTCCTTGGTATTTtgttttaatccttgtaaaatcatttcatattgaaattggtccctataatattcattttagtcctcgttttgagggactaaaatcaaatattctacatattacaaggaccaaatccaatataaatcaattttacaaggattaaaacaaaataccaaggaccaaaaccaaattttttatatttgcaagga	mtr-MIR2630e-p5	TTTGGTCCTTGGTATTTtgtt	5'	New	gp1	((.(((((((((((((.(((((((((((((((((((((((((((((((.((((((((((((...(((((((((...(((((((...........((((((((((((.....)).))))))))))..(((((.....)))))....)))))))...)))))))))...)))))))))))).))))))))))))))))))))))))))))))).))))))))))))).)).	228	27.5	-109.8	1.7	0.533333	0.416667	0	0.75	0	0	0.62547	0.391111	0	0.762698	0	0	low
179	310	mtr-MIR2630e-p3	AAATATTCTACATATTACAAGGAC	24	chr1.3	-	49160942	49161170	ccctgcaaatatagaatatttggtTTTGGTCCTTGGTATTTTGTTttaatccttgtaaaatcatttcatattgaaattggtccctataatattcattttagtcctcattttgagggactaaaatcAAATATTCTACATATTACAAGGACcaaatccaatatgaatcaattttacaaggactaaaataaaatatcaaggaccaaaaccaaattttttatatttgcaagga	2	mtr-MIR2630e,mtr-MIR2630f,	mtr-MIR2630e	ccctgcaaatatataatattTGGTTTTGGTCCTTGGTATTTtgttttaatccttgtaaaatcatttcatattgaaattggtccctataatattcattttagtcctcgttttgagggactaaaatcaaatattctacatattacaaggaccaaatccaatataaatcaattttacaaggattaaaacaaaataccaaggaccaaaaccaaattttttatatttgcaagga	mtr-MIR2630e-p3	aaatattctacatattacaaggac	3'	New	gp1	((.(((((((((((((.(((((((((((((((((((((((((((((((.((((((((((((...(((((((((...(((((((...........((((((((((((.....)).))))))))))..(((((.....)))))....)))))))...)))))))))...)))))))))))).))))))))))))))))))))))))))))))).))))))))))))).)).	228	27.5	-109.8	1.7	7.14286	3.05556	0	2.17143	11.9841	0.666667	8.37683	2.86815	0	2.20819	12.213	0.645528	middle
180	311	mtr-MIR2630s-p5	TTTGGTCCTTGGTATTTTGTT	21	chr1.1	+	50676601	50676829	ccctgcaaatatagaatatttggtTTTGGTCCTTGGTATTTTGTTttaatccttgtaaaatcatttcatattgaaattggtccctataatattcattttagtcctcattttgagggactaaaatcaaatattctacatattacaaggaccaaatctaatatgAATCAATTTTACAAGGACTAAAACaaaataccaaggaccaaaaccaaattttttatatttgcaggga	1	mtr-MIR2630s,	mtr-MIR2630s	ccctgcaaatatagaatattTGGTTTTGGTCCTTGGTATTTtgttttaatccttgtaaaatcatttcatattaaaattggtccctataatattcattttagttctcattttgagggactaaaattaaatattctacatattacaaggaccaaatcgaatatgaatcaattttacaaggactaaaacaaaacaccaaggaccaaaacccaattttttatatttgcaggga	mtr-MIR2630s-p5	TTTGGTCCTTGGTATTTtgtt	5'	New	gp1	((((((((((((((((.(((((((((((((((((((((((((((((((.((((((((((((...(((((((((...(((((((...........((((((((((((.....)).))))))))))..(((((.....)))))....)))))))...)))))))))...)))))))))))).))))))))))))))))))))))))))))))).)))))))))))))))).	228	28.4	-119	1.8	0.533333	0.416667	0	0.75	0	0	0.62547	0.391111	0	0.762698	0	0	low
180	312	mtr-MIR2630s-p3	AATCAATTTTACAAGGACTAAAAC	24	chr1.1	+	50676601	50676829	ccctgcaaatatagaatatttggtTTTGGTCCTTGGTATTTTGTTttaatccttgtaaaatcatttcatattgaaattggtccctataatattcattttagtcctcattttgagggactaaaatcaaatattctacatattacaaggaccaaatctaatatgAATCAATTTTACAAGGACTAAAACaaaataccaaggaccaaaaccaaattttttatatttgcaggga	1	mtr-MIR2630s,	mtr-MIR2630s	ccctgcaaatatagaatattTGGTTTTGGTCCTTGGTATTTtgttttaatccttgtaaaatcatttcatattaaaattggtccctataatattcattttagttctcattttgagggactaaaattaaatattctacatattacaaggaccaaatcgaatatgaatcaattttacaaggactaaaacaaaacaccaaggaccaaaacccaattttttatatttgcaggga	mtr-MIR2630s-p3	aatcaattttacaaggactaaaac	3'	New	gp1	((((((((((((((((.(((((((((((((((((((((((((((((((.((((((((((((...(((((((((...(((((((...........((((((((((((.....)).))))))))))..(((((.....)))))....)))))))...)))))))))...)))))))))))).))))))))))))))))))))))))))))))).)))))))))))))))).	228	28.4	-119	1.8	2.2	2.15556	1.2	1.45714	2.78889	2.26667	2.58006	2.02335	1.36966	1.48181	2.84216	2.1948	low
181	313	mtr-MIR2630r-p5	TTTGGTCCTTGGTATTTTGTT	21	chr7.2	-	25728743	25728971	ccctgcaaatatagaatatttggtTTTGGTCCTTGGTATTTTGTTttaatccttgtaaaatcatttcatattgaaattggtccctataatattcattttagtcctcattttgagggactaaaatcaaatattctacatattacaaggaccaaattcaatatgaatcaattttacaaggactaaAACAAAATACCAAGGACCAAAACCaaattttttatatttgcaggga	2	mtr-MIR2630r,mtr-MIR2630l,	mtr-MIR2630r	ccctgcaaatatagaatattTGGTTTTGGTCCTTGGTATTTtgttttaatccttgtaaaatcatttcatgttgaaattggtccctataatattcattttagtcttcattttgagggactaaaatcaaatattctacatattacaaggaccaaattcaatatgaatcaattttacaaagactaaaacaaaataccaaggaccaaaatcaaattttttatatttgcaggga	mtr-MIR2630r-p5	TTTGGTCCTTGGTATTTtgtt	5'	New	gp1	((((((((((((((((.(((((((((((((((((((((((((((((((.((((((((((((...(((((((((((.(((((((...........((((((((((((.....)).))))))))))..(((((.....)))))....))))))).)))))))))))...)))))))))))).))))))))))))))))))))))))))))))).)))))))))))))))).	228	28.4	-125.1	1.9	0.533333	0.416667	0	0.75	0	0	0.62547	0.391111	0	0.762698	0	0	low
181	314	mtr-MIR2630l-p3	AACAAAATACCAAGGACCAAAACC	24	chr7.2	-	25728743	25728971	ccctgcaaatatagaatatttggtTTTGGTCCTTGGTATTTTGTTttaatccttgtaaaatcatttcatattgaaattggtccctataatattcattttagtcctcattttgagggactaaaatcaaatattctacatattacaaggaccaaattcaatatgaatcaattttacaaggactaaAACAAAATACCAAGGACCAAAACCaaattttttatatttgcaggga	2	mtr-MIR2630r,mtr-MIR2630l,	mtr-MIR2630l	ctctgcaaatatagaatattTGGTTTTGGTCCTTGGTATTTtgttttaatccttgtaaaatcatttcatattgaaattggtccttataatattcattttagtcctcatttggaaggactaaaatcaaatattctacatattacaaggaccaaattcaatataaatcaattttacaagaacttaaacaaaataccaaggaccaaaaccaaattttttatatttgcaggga	mtr-MIR2630l-p3	aacaaaataccaaggaccaaaacc	3'	New	gp1	((((((((((((((((.(((((((((((((((((((((((((((((((.((((((((((((...(((((((((((.(((((((...........((((((((((((.....)).))))))))))..(((((.....)))))....))))))).)))))))))))...)))))))))))).))))))))))))))))))))))))))))))).)))))))))))))))).	228	28.4	-125.1	1.9	4.00952	4.43056	2.6	2.8619	2.98413	0.666667	4.70219	4.15882	2.9676	2.91036	3.04113	0.645528	low
182	315	mtr-MIR2630o-p5	TTTGGTCCTTGGTATTTTGTT	21	chr2.4	-	7223560	7223786	ccctgcaaatatagaatatttggtTTTGGTCCTTTGTATTTTGTTttaatccttgtaaaatcatttcatattgaaattggtccctataatattcattttagtcctcattttgagggactaaaatcAAATATTCTACATATTACAAGGACcaaatccaatatgaatcaattttacaaggactaaaacaaaatatcaaggatcaaaaccaaattttttatatttgcagg	1	mtr-MIR2630o,	mtr-MIR2630o	ccctgcaaatatagaatattTGGTTTTGGTCCTTGGTATTTtgttttaatccttataaaatcatttcatattgaaattggtccctataatattcattttagtcctcattttgagggactaaaatcaaatattctacatattacaaggaccaaatccaatatgaattaattttacaaggactaaaacaaaatatcaaggatcaaaaccaaattttttatatttgcagga	mtr-MIR2630o-p5	TTTGGTCCTTGGTATTTtgtt	5'	New	gp1	.(((((((((((((((.(((((((((((((((((..((((((((((((.((((((((((((...(((((((((...(((((((...........((((((((((((.....)).))))))))))..(((((.....)))))....)))))))...)))))))))...)))))))))))).))))))))))))..))))))))))))))))).)))))))))))))))	226	27.3	-105.2	1.7	0.533333	0.416667	0	0.75	0	0	0.62547	0.391111	0	0.762698	0	0	low
182	316	mtr-MIR2630o-p3	AAATATTCTACATATTACAAGGAC	24	chr2.4	-	7223560	7223786	ccctgcaaatatagaatatttggtTTTGGTCCTTTGTATTTTGTTttaatccttgtaaaatcatttcatattgaaattggtccctataatattcattttagtcctcattttgagggactaaaatcAAATATTCTACATATTACAAGGACcaaatccaatatgaatcaattttacaaggactaaaacaaaatatcaaggatcaaaaccaaattttttatatttgcagg	1	mtr-MIR2630o,	mtr-MIR2630o	ccctgcaaatatagaatattTGGTTTTGGTCCTTGGTATTTtgttttaatccttataaaatcatttcatattgaaattggtccctataatattcattttagtcctcattttgagggactaaaatcaaatattctacatattacaaggaccaaatccaatatgaattaattttacaaggactaaaacaaaatatcaaggatcaaaaccaaattttttatatttgcagga	mtr-MIR2630o-p3	aaatattctacatattacaaggac	3'	New	gp1	.(((((((((((((((.(((((((((((((((((..((((((((((((.((((((((((((...(((((((((...(((((((...........((((((((((((.....)).))))))))))..(((((.....)))))....)))))))...)))))))))...)))))))))))).))))))))))))..))))))))))))))))).)))))))))))))))	226	27.3	-105.2	1.7	7.14286	3.05556	0	2.17143	11.9841	0.666667	8.37683	2.86815	0	2.20819	12.213	0.645528	middle
183	317	mtr-MIR2630y-p5_1ss18AT	TTTGATTTTAGTCCCTCTAAA	21	chr4.3	-	40726745	40726969	ctgcaaatataaaaaatttggttttggtccttggtattttgttttagtccttgtaaaattgattcatattggatttggtcattgtaatatgtagaataTTTGATTTTAGTCCCTCAAAAtgAGGACTAAAATGAATATTATAGGGaccaatttcaatatgaaatgattttacaaggattaaaacaaaataccaaggaccaaaaccaaatattctatatttgcagg	1	mtr-MIR2630y,	mtr-MIR2630y	actgcaaatataaaaaattTGGTTTTGGTCCTTGGTATTTtgttttagtccttgtaaaattgattcatattggatttggtcattgtaatatgtagaatatttgattttagtccctcaaaatgaggactaaaatgaatattatagggaccaatttcaatatgaaatgattttacaaggattaaaacaaaataccaaggatcaaaaccaaatattctatatttgcagg	mtr-MIR2630y-p5	tttgattttagtccctcaaaa	5'	New	gp1	(((((((((((.((.(((((((((((((((((((((((((((((((((((((((((((((..(((((((((((.((((((..((((((((..........(.((((((((((.((.....)))))))))))).)))))))))..)))))).)))))))))))..))))))))))))))))))))))))))))))))))))))))))))).)).))))))))))).	224	27.6	-122.4	2	0.533333	6.66667	2.5	1.66667	2.5	4	0.62547	6.25778	2.85346	1.69488	2.54776	3.87317	low
183	318	mtr-MIR2630y-p3	AGGACTAAAATGAATATTATAGGG	24	chr4.3	-	40726745	40726969	ctgcaaatataaaaaatttggttttggtccttggtattttgttttagtccttgtaaaattgattcatattggatttggtcattgtaatatgtagaataTTTGATTTTAGTCCCTCAAAAtgAGGACTAAAATGAATATTATAGGGaccaatttcaatatgaaatgattttacaaggattaaaacaaaataccaaggaccaaaaccaaatattctatatttgcagg	1	mtr-MIR2630y,	mtr-MIR2630y	actgcaaatataaaaaattTGGTTTTGGTCCTTGGTATTTtgttttagtccttgtaaaattgattcatattggatttggtcattgtaatatgtagaatatttgattttagtccctcaaaatgaggactaaaatgaatattatagggaccaatttcaatatgaaatgattttacaaggattaaaacaaaataccaaggatcaaaaccaaatattctatatttgcagg	mtr-MIR2630y-p3	aggactaaaatgaatattataggg	3'	New	gp1	(((((((((((.((.(((((((((((((((((((((((((((((((((((((((((((((..(((((((((((.((((((..((((((((..........(.((((((((((.((.....)))))))))))).)))))))))..)))))).)))))))))))..))))))))))))))))))))))))))))))))))))))))))))).)).))))))))))).	224	27.6	-122.4	2	9.66667	50	24.6667	25.8333	33.5	33.8333	11.3366	46.9334	28.1541	26.2707	34.1399	32.7606	middle
184	319	mtr-MIR2630w-p5_1ss18AT	TTTGATTTTAGTCCCTCTAAA	21	chr1.1	-	23367251	23367477	ctgcaaatataaaaaatttggttttgttccttggtattttgttttagtccttgtaaaattgattcatattggatttggtccttgtaatatgtagaataTTTGATTTTAGTCCCTCAAAAtgAGGACTAAAATGAATATTATAGGGaccaatttcaatatgaaatgattttacaaggattaaaacaaaataccaaggaccaaaaccaaatattctatatttgcatgga	1	mtr-MIR2630w,	mtr-MIR2630w	actgcaaatataaaaaatttTGGTTTTGGTCCTTGGTATTTtgttttagtccttgtaaaatagattcatattggatttggtctttgtaataggtagaatatttgattttagtccctcaaaacgaggactaaaatgaatattatagggaccaatttcaatatgaaatgattttacaaagattaaaacaaaataccaaggaccaaaaccaaatattctttatttgaatgga	mtr-MIR2630w-p5	tttgattttagtccctcaaaa	5'	New	gp1	.((((((((((.((.(((((((((((.(((((((((((((((((((((((((((((((((..(((((((((((.((((((((((((((((..........(.((((((((((.((.....)))))))))))).))))))))))))))))).)))))))))))..))))))))))))))))))))))))))))))))).))))))))))).)).))))))))))....	222	27.3	-120.1	1.9	0.533333	6.66667	2.5	1.66667	2.5	4	0.62547	6.25778	2.85346	1.69488	2.54776	3.87317	low
184	320	mtr-MIR2630w-p3	AGGACTAAAATGAATATTATAGGG	24	chr1.1	-	23367251	23367477	ctgcaaatataaaaaatttggttttgttccttggtattttgttttagtccttgtaaaattgattcatattggatttggtccttgtaatatgtagaataTTTGATTTTAGTCCCTCAAAAtgAGGACTAAAATGAATATTATAGGGaccaatttcaatatgaaatgattttacaaggattaaaacaaaataccaaggaccaaaaccaaatattctatatttgcatgga	1	mtr-MIR2630w,	mtr-MIR2630w	actgcaaatataaaaaatttTGGTTTTGGTCCTTGGTATTTtgttttagtccttgtaaaatagattcatattggatttggtctttgtaataggtagaatatttgattttagtccctcaaaacgaggactaaaatgaatattatagggaccaatttcaatatgaaatgattttacaaagattaaaacaaaataccaaggaccaaaaccaaatattctttatttgaatgga	mtr-MIR2630w-p3	aggactaaaatgaatattataggg	3'	New	gp1	.((((((((((.((.(((((((((((.(((((((((((((((((((((((((((((((((..(((((((((((.((((((((((((((((..........(.((((((((((.((.....)))))))))))).))))))))))))))))).)))))))))))..))))))))))))))))))))))))))))))))).))))))))))).)).))))))))))....	222	27.3	-120.1	1.9	9.66667	50	24.6667	25.8333	33.5	33.8333	11.3366	46.9334	28.1541	26.2707	34.1399	32.7606	middle
185	321	mtr-MIR2630b-p5	TTTGGTCCTTGGTATTTTGTT	21	chr1.2	+	52192142	52192367	ctgcaaatatagaatatttggtTTTGGTCCTTGGTATTTTGTTttaatccttgtaaaatcatttcatattgaaattggtccctataatattcattttagtcctcattttgagggactaaaatcAAATATTCTACATATTACAAGGACcaaatccaataagaatcaattttacaaggactaaaacaaaaaccaaggaccaaaaccaaattttttatatttgcagaga	1	mtr-MIR2630b,	mtr-MIR2630b	ctctgcaaatataaaatattTGGTTTTGGTCCTTGGTATTTtgttttaatccttgtaaaatcatttcatattgaaaatggtccctataatattcattttagtcctcgttttgagggactaaaatcaaatattctacatattacaaggacaaaatccaatatgaatcaattttacaaggactaaaataaaataccaaggaccaaaaccaaattttttatatttacagaga	mtr-MIR2630b-p5	TTTGGTCCTTGGTATTTtgtt	5'	New	gp1	((((((((((((((.((((((((((((((((((((.((((((((((.((((((((((((...(((.(((((...(((((((...........((((((((((((.....)).))))))))))..(((((.....)))))....)))))))...))))).)))...)))))))))))).)))))))))))))))))))))))))))))).))))))))))))))...	223	27.9	-104.6	1.7	0.533333	0.416667	0	0.75	0	0	0.62547	0.391111	0	0.762698	0	0	low
185	322	mtr-MIR2630b-p3	AAATATTCTACATATTACAAGGAC	24	chr1.2	+	52192142	52192367	ctgcaaatatagaatatttggtTTTGGTCCTTGGTATTTTGTTttaatccttgtaaaatcatttcatattgaaattggtccctataatattcattttagtcctcattttgagggactaaaatcAAATATTCTACATATTACAAGGACcaaatccaataagaatcaattttacaaggactaaaacaaaaaccaaggaccaaaaccaaattttttatatttgcagaga	1	mtr-MIR2630b,	mtr-MIR2630b	ctctgcaaatataaaatattTGGTTTTGGTCCTTGGTATTTtgttttaatccttgtaaaatcatttcatattgaaaatggtccctataatattcattttagtcctcgttttgagggactaaaatcaaatattctacatattacaaggacaaaatccaatatgaatcaattttacaaggactaaaataaaataccaaggaccaaaaccaaattttttatatttacagaga	mtr-MIR2630b-p3	aaatattctacatattacaaggac	3'	New	gp1	((((((((((((((.((((((((((((((((((((.((((((((((.((((((((((((...(((.(((((...(((((((...........((((((((((((.....)).))))))))))..(((((.....)))))....)))))))...))))).)))...)))))))))))).)))))))))))))))))))))))))))))).))))))))))))))...	223	27.9	-104.6	1.7	7.14286	3.05556	0	2.17143	11.9841	0.666667	8.37683	2.86815	0	2.20819	12.213	0.645528	middle
186	323	mtr-MIR2632c-p5_1ss9TG	TCAGGGACGAAAATTCAAATGACC	24	chr4.4	+	29853104	29853422	agaccatttgagttttcgtccctgaagttactaatccttccaatttgccactgcaaatattaatcatttgaaaaatggtcctaattacatctgattagtaactTCAGGGACGAAAATTCAAATGACCtatatttgcagggacgaaagacctatttaagccaaccacctcgtccaatcatcacttgccacATGTGCACCACGTCGCTAATGACAgcccacctcagcaaaaaaacctaattaggaccaaaagtcaaatgattaatatttacagtggcagattggaaggattagtaacttcagcgacgaaaattcaaatgac	1	mtr-MIR2632c,	mtr-MIR2632c	agaccatttgaattttcgtcCCTGAAGTTACTAATCCTTCCAatatgcccctgcaaatattaatcatttgacttttgatcataattacatctgattagtaacttcagtgatgaaaattcaagtgacctatatttggagggatgaaagacctatttaagcaaaccacctagcccaatcatcacttgccacatgggcaccacgtcgctaatgacaacccacctcaccaaaaaaacctaattaggagcaaaagtcaaatgattaatatttacgggggcagattgaaaggattagtaacttcagggactaaaattcaaatgaccta	mtr-MIR2632c-p5	tcagggactaaaattcaaatgacc	5'	New	gp1	....((((((((((((((((.((((((((((((((((((((((((((((((((.(((((((((((((((((....((((((((((((......(((((..((.....((((((.....((((((.....))))))...((...(((......)))...)).......))))))..........(((.......)))....))..)))))....((........)).........))))))))))))....))))))))))))))))).)))))))))))))))))))))))))))))))).))))))))))))))))..	66	38.6	-138.8	1.1	85	124	91	85	96	188	99.6843	116.395	103.866	86.4391	97.8338	182.039	middle
186	324	mtr-MIR2632c-p3	ATGGGCACCACGTCGCTAATGACA	24	chr4.4	+	29853104	29853422	agaccatttgagttttcgtccctgaagttactaatccttccaatttgccactgcaaatattaatcatttgaaaaatggtcctaattacatctgattagtaactTCAGGGACGAAAATTCAAATGACCtatatttgcagggacgaaagacctatttaagccaaccacctcgtccaatcatcacttgccacATGTGCACCACGTCGCTAATGACAgcccacctcagcaaaaaaacctaattaggaccaaaagtcaaatgattaatatttacagtggcagattggaaggattagtaacttcagcgacgaaaattcaaatgac	1	mtr-MIR2632c,	mtr-MIR2632c	agaccatttgaattttcgtcCCTGAAGTTACTAATCCTTCCAatatgcccctgcaaatattaatcatttgacttttgatcataattacatctgattagtaacttcagtgatgaaaattcaagtgacctatatttggagggatgaaagacctatttaagcaaaccacctagcccaatcatcacttgccacatgggcaccacgtcgctaatgacaacccacctcaccaaaaaaacctaattaggagcaaaagtcaaatgattaatatttacgggggcagattgaaaggattagtaacttcagggactaaaattcaaatgaccta	mtr-MIR2632c-p3	atgggcaccacgtcgctaatgaca	3'	New	gp1	....((((((((((((((((.((((((((((((((((((((((((((((((((.(((((((((((((((((....((((((((((((......(((((..((.....((((((.....((((((.....))))))...((...(((......)))...)).......))))))..........(((.......)))....))..)))))....((........)).........))))))))))))....))))))))))))))))).)))))))))))))))))))))))))))))))).))))))))))))))))..	66	38.6	-138.8	1.1	0	0	0	7	5	3	0	0	0	7.11852	5.09551	2.90488	middle
187	325	mtr-MIR2634-p5	TCAACAAACTCAGAATTGAAG	21	chr4.1	+	22733192	22733291	attctagccatgatccgaTCAACAAACTCAGAATTGAAGagtatggcttaaatgcttagacactccTTTATTCTCAGTTTGTTGCTCacatcatagccgg	1	mtr-MIR2634,	mtr-MIR2634	attctagccatgatacgatcaacaaactcagaattgaagagtatggcttaaatgcttagacactccTTTATTCTCAGTTTGTTGCTCacatcatagccggaaa	mtr-MIR2634-p5	tcaacaaactcagaattgaag	5'	New	gp1	...(..((.(((((..((.(((((((((.(((((..(.((((..(((......))).....)))).)..))))).))))))))).))..))))).))..)	97	40	-30.1	0.8	11	5	6	8	0	6	12.9003	4.69334	6.84831	8.13545	0	5.80976	middle
187	326	mtr-miR2634	TTTATTCTCAGTTTGTTGCTC	21	chr4.1	+	22733192	22733291	attctagccatgatccgaTCAACAAACTCAGAATTGAAGagtatggcttaaatgcttagacactccTTTATTCTCAGTTTGTTGCTCacatcatagccgg	1	mtr-MIR2634,	mtr-MIR2634	attctagccatgatacgatcaacaaactcagaattgaagagtatggcttaaatgcttagacactccTTTATTCTCAGTTTGTTGCTCacatcatagccggaaa	mtr-miR2634	TTTATTCTCAGTTTGTTGCTC	3'	Yes	gp1	...(..((.(((((..((.(((((((((.(((((..(.((((..(((......))).....)))).)..))))).))))))))).))..))))).))..)	97	40	-30.1	0.8	11	10	14	16	15	11	12.9003	9.38667	15.9794	16.2709	15.2865	10.6512	middle
188	327	mtr-miR2635_L+3R+1_1ss11TC	AATATTATTGCCAACGTGACTAGA	24	chr2.1	-	42520526	42520678	aatattagatttAATATTATTGCCAACGTGACTAGAacctaaagggtcacacacaaagaacagtcaaaagagaaatatataagtgtgacttatataaggggtgcgtttagtaaataacgctaattagttagcaaaatactaaactcgttattg	1	mtr-MIR2635,	mtr-MIR2635	aaatattagatttaatATTATTGTCAACGTGACTAGaatataaagagtcacacacaaagaacggtcaaaagagaaatatataagtgtgacttatataggtatgcgtttagtaaataacactaattagttagcaaaatattaaactcgttattg	mtr-miR2635	ATTATTGTCAACGTGACTAG	5'	Diff	gp1	(((((((....))))))).........(((((....((((....((((((((...........((......)).........))))))))........))))..((((((((......(((((....)))))....))))))))..)))))..	18	30.7	-27.7	0.6	0	16	9	0	0	9	0	15.0187	10.2725	0	0	8.71463	middle
189	328	mtr-MIR2636-p3_2ss7TG17AC	TGAATAGAGTAGATTCCTTGTACC	24	chr4.4	+	65974184	65974303	gtgggtacaaagaatccactttattcaacacactaaccaaaaaaccccaatttctaagatatgtttcaaattagggtttttttggttaatgtgcTGAATAGAGTAGATTCCTTGTACCca	1	mtr-MIR2636,	mtr-MIR2636	gtgggtacaaggaatccactttattaaacacactaaccaaaaaactgtaatttctaagatatgtttcaaattaaggtgttTTTGGTTAGTGTGCTGAATATagtagattcattgtaccca	mtr-MIR2636-p3	TGAATATagtagattcattgtacc	3'	New	gp1	.(((((((((.(((((.((((((((((.((((.((((((((((((((.(((((....((......))))))).))).))))))))))).)))).)))))))))).))))).)))))))))	119	34.2	-55.3	1.3	7	0	0	7	0	8	8.2093	0	0	7.11852	0	7.74634	low
190	329	mtr-MIR2638b-p5_1ss7AG	AGGGACGAAAGACCTATTTAAGCC	24	chr7.1	-	39325730	39325998	gttactaatccttccaatctgccactgcaaatattaatcatttgaaaaatggtcctaattacatctgattagtaacttcagtgatgaaaattcaaatgaccaatatttgcAGGGACGAAAGACCTATTTAAGCTaaccacctcgtccaatcatcacttgccacatgggcaccacgTCGCTAATGACAGCCCACCTCAGCaaaaaaaacctaattaggaccaaaagtcaaatgattaatatttgcattggcagattgaaatgattagtaa	1	mtr-MIR2638b,	mtr-MIR2638b	gttactaatccttccaatctgccactgcaaatattaatcatttgaaaaatagtcctaattacatctgattagtaactttagggatgaaaattcaaatgatatatatttgcagggacaaaagacctatttaagccaaccacctcgtccaatcatcacttgccacataggcaccacgtcgctaatgatagcccatctcagcaaaaaaaaactaattaggaccaaaagtcaaATGATTAATATTTGCAGTGGCagattggaatgattagtaa	mtr-MIR2638b-p5	agggacaaaagacctatttaagcc	5'	New	gp1	.(((((((((.((.((((((((((.((((((((((((((((((((....((((((((((((......(((((..((...((((((((.....((((((.....))))))...((((((.......................))))))..))))))))((((.....))))....))..)))))....((........))..........))))))))))))....)))))))))))))))))))).)))))))))).)).)))))))))	35	36.8	-101.1	1	16	49	22	27	22	51	18.7641	45.9947	25.1105	27.4571	22.4202	49.3829	middle
190	330	mtr-MIR2638b-p3_2ss11TC18TC	TCGCTAATGACAGCCCACCTCAGC	24	chr7.1	-	39325730	39325998	gttactaatccttccaatctgccactgcaaatattaatcatttgaaaaatggtcctaattacatctgattagtaacttcagtgatgaaaattcaaatgaccaatatttgcAGGGACGAAAGACCTATTTAAGCTaaccacctcgtccaatcatcacttgccacatgggcaccacgTCGCTAATGACAGCCCACCTCAGCaaaaaaaacctaattaggaccaaaagtcaaatgattaatatttgcattggcagattgaaatgattagtaa	1	mtr-MIR2638b,	mtr-MIR2638b	gttactaatccttccaatctgccactgcaaatattaatcatttgaaaaatagtcctaattacatctgattagtaactttagggatgaaaattcaaatgatatatatttgcagggacaaaagacctatttaagccaaccacctcgtccaatcatcacttgccacataggcaccacgtcgctaatgatagcccatctcagcaaaaaaaaactaattaggaccaaaagtcaaATGATTAATATTTGCAGTGGCagattggaatgattagtaa	mtr-MIR2638b-p3	tcgctaatgatagcccatctcagc	3'	New	gp1	.(((((((((.((.((((((((((.((((((((((((((((((((....((((((((((((......(((((..((...((((((((.....((((((.....))))))...((((((.......................))))))..))))))))((((.....))))....))..)))))....((........))..........))))))))))))....)))))))))))))))))))).)))))))))).)).)))))))))	35	36.8	-101.1	1	0	0	0	0	0	3	0	0	0	0	0	2.90488	low
191	331	mtr-MIR2638a-p3_1ss16TC	CTTAAATAGGTCTTTCGTCCC	21	chr4.4	-	29853131	29853398	gttactaatccttccaatctgccactgtaaatattaatcatttgacttttggtcctaattaggtttttttgctgaggtgggctgtcattagcgacgtggtgcacatgtggcaagtgatgattggacgaggtggttggCTTAAATAGGTCTTTCGTCCCtgcaaatataggtcatttgaattttcgtccctgaagttactaatcagatgtaattaggaccatttttcaaatgattaatatttgcagtggcaaattggaaggattagtaa	1	mtr-MIR2638a,	mtr-MIR2638a	gttactaatcattccaatctgccactgcaaatattaatcatttgacttttggtcctaattagtttttttttgctgagatgggctatcattagcgacgtggtgcctatgtggcaagtgatgattggacgaggtggttggcttaaataggtcttttgtccctgcaaatatatatcatttgaattttcatccctaaagttactaatcagatgtaattaggactatttttcaaATGATTAATATTTGCAGTGGCagattggaaggattagtaa	mtr-MIR2638a-p3	cttaaataggtcttttgtccc	3'	New	gp1	.(((((((((((((((((.((((((((((((((((((((((((((....((((((((((((((((.....(((..((.((((.((((((.((.(((((.....))))).)).))))))....(((((((......(((((....))))).)))))))...(((((.......))))).......))))))..)))....)))).....))))))))))))....)))))))))))))))))))))))))).)))))))))))))))))	35	38.1	-118.3	1.2	0	0	0	11	5	0	0	0	0	11.1862	5.09551	0	middle
192	332	mtr-MIR2642-p5_1ss16TC	TGATTGGTTAAAATTCACATG	21	chr1.2	-	77460120	77460210	ttTGATTGGTTAAAATTTACATGagtcccaccaaatcatgtgggtcccatataaatttggcaggtactatgtgaattttaaccaatcaaag	1	mtr-MIR2642,	mtr-MIR2642	tttgattggttaaaatttacATGAGTTTCATCAAATCATGTggttcccatataaattttgtgagacgtatgtgaactttaaccaatcaaag	mtr-MIR2642-p5	tgattggttaaaatttacATG	5'	New	gp1	((((((((((((((((((((((.(((((..((((((.((((((...))))))..))))))..)).))))))))))))))))))))))))).	90	34.1	-41.2	1.3	0	7	0	0	0	0	0	6.57067	0	0	0	0	low
193	333	mtr-miR2643b-5p_2ss12TA19TA	TCTAATCTCTGATCCCAAATA	21	chr5.3	-	78120618	78120710	gtccttgaattcTCTAATCTCCGATCCCAATTAcactaaatccatacaaagatcaagtgagTTTGGGATCAGAAATTAGAGAtatcaagtact	1	mtr-MIR2643b,	mtr-MIR2643b	gtccttgaattcTCTAATCTCTGTTCCCAATTAcacttaatccatgaaaagatcaagtgagTTTGGGATCAGAAATTAGAGAtatcaatact	mtr-miR2643b-5p	TCTAATCTCTGTTCCCAATTA	5'	Diff	gp1	((.(((((..((((((((.((.((((((((...((((..(((........)))..))))...)))))))).)).))))))))..))))).)).	92	35.5	-36.2	1.1	407	307	278	455	359	222	477.312	288.171	317.305	462.703	365.858	214.961	middle
193	334	mtr-miR2643a	TTTGGGATCAGAAATTAGAGA	21	chr5.3	-	78120618	78120710	gtccttgaattcTCTAATCTCCGATCCCAATTAcactaaatccatacaaagatcaagtgagTTTGGGATCAGAAATTAGAGAtatcaagtact	1	mtr-MIR2643b,	mtr-MIR2643b	gtccttgaattcTCTAATCTCTGTTCCCAATTAcacttaatccatgaaaagatcaagtgagTTTGGGATCAGAAATTAGAGAtatcaatact	mtr-miR2643a	TTTGGGATCAGAAATTAGAGA	3'	Yes	gp1	((.(((((..((((((((.((.((((((((...((((..(((........)))..))))...)))))))).)).))))))))..))))).)).	92	35.5	-36.2	1.1	37015	30871	29947	36510	36537	21103	43409.6	28977.6	34181	37128.1	37234.9	20433.9	high
194	335	mtr-MIR2650-p5_2ss15AG23AG	TTTTGCGTGACTTTGAAGAATAGT	24	chr4.1	+	45417883	45418055	gtctcaattatttaaggttaaatatatttttggtccctacaTTTTGCGTGACTTTGAAGAATAATccttattattttagggattttaaaaacatttattgaaatgcaatgattatttttcAAAGTCACGCAAAATGTAGGGACCaaaaacatatttaaccttaaaataattgg	1	mtr-MIR2650,	mtr-MIR2650	agtctcaattatttcaAACTTAAATATGTTTTCAGTCCctacattttgcgtgactttaaagaataatctttatattttagggattttaaaaacatttattgaaatgtaaggactatttttaaaagtcacgcaaaatgtcggaacgaaaaacatatttaaccttaaaatatttggaacc	mtr-MIR2650-p5	ttttgcgtgactttaaagaataat	5'	New	gp1	....(((((((((((((((((((((.(((((((((((((((((((((((((((((((((((((.((((((......))))))............((((((.....)))))).))))))))))))))))))))))))))))))))))))).))))))))))))))).)))))).	168	26	-88.9	2	0	0	0	6	0	5	0	0	0	6.10158	0	4.84146	low
194	336	mtr-MIR2650-p3_2ss18CA24GC	AAAGTCACGCAAAATGTAGGAACC	24	chr4.1	+	45417883	45418055	gtctcaattatttaaggttaaatatatttttggtccctacaTTTTGCGTGACTTTGAAGAATAATccttattattttagggattttaaaaacatttattgaaatgcaatgattatttttcAAAGTCACGCAAAATGTAGGGACCaaaaacatatttaaccttaaaataattgg	1	mtr-MIR2650,	mtr-MIR2650	agtctcaattatttcaAACTTAAATATGTTTTCAGTCCctacattttgcgtgactttaaagaataatctttatattttagggattttaaaaacatttattgaaatgtaaggactatttttaaaagtcacgcaaaatgtcggaacgaaaaacatatttaaccttaaaatatttggaacc	mtr-MIR2650-p3	aaagtcacgcaaaatgtcggaacg	3'	New	gp1	....(((((((((((((((((((((.(((((((((((((((((((((((((((((((((((((.((((((......))))))............((((((.....)))))).))))))))))))))))))))))))))))))))))))).))))))))))))))).)))))).	168	26	-88.9	2	0	6	0	0	5	0	0	5.632	0	0	5.09551	0	low
195	337	mtr-MIR2651-p5	ATTTAATGCAGGCATACTAGT	21	chr2.1	+	4790078	4790226	attggggtgcaatataATTTAATGCAGGCATACTAGTcaaattatttggtttaattttcccttttcagttcttcttttcttttgtacatttggaaattgaacccaataaTTTGATTGGTATGCCTGCATTaaattgtattgtgccccaa	1	mtr-MIR2651,	mtr-MIR2651	attggggtgcaatataatttaatgcaggcatactagtcaaattatttggtttaatttccccttttgaggtttttttcttttgtacatttggaaattgaatcaaataaTTTGATTGGTATGCCTGCATTaaattgtattgtgccccaa	mtr-MIR2651-p5	atttaatgcaggcatactagt	5'	New	gp1	.((((((..(((((((((((((((((((((((((((((((((((((.((((((((((((......(((.............))).......)))))))))))).)))))))))))))))))))))))))))))))))))))..))))))	148	31.5	-80.9	1.7	0	5	0	13	0	5	0	4.69334	0	13.2201	0	4.84146	middle
195	338	mtr-miR2651	TTTGATTGGTATGCCTGCATT	21	chr2.1	+	4790078	4790226	attggggtgcaatataATTTAATGCAGGCATACTAGTcaaattatttggtttaattttcccttttcagttcttcttttcttttgtacatttggaaattgaacccaataaTTTGATTGGTATGCCTGCATTaaattgtattgtgccccaa	1	mtr-MIR2651,	mtr-MIR2651	attggggtgcaatataatttaatgcaggcatactagtcaaattatttggtttaatttccccttttgaggtttttttcttttgtacatttggaaattgaatcaaataaTTTGATTGGTATGCCTGCATTaaattgtattgtgccccaa	mtr-miR2651	TTTGATTGGTATGCCTGCATT	3'	Yes	gp1	.((((((..(((((((((((((((((((((((((((((((((((((.((((((((((((......(((.............))).......)))))))))))).)))))))))))))))))))))))))))))))))))))..))))))	148	31.5	-80.9	1.7	77	38	42	111	49	45	90.3022	35.6694	47.9381	112.879	49.936	43.5732	middle
196	339	mtr-MIR2655m-p5_1ss21TC	AAGTATCGGTTTGGTCCCTTCTGT	24	chr2.3	-	57165470	57165727	aataaaaggtccgtttaggtcccttaactttatttaAAGTATCGGTTTGGTCCCTTCTGTtgatttaattcaaaaaaacgttaagtttaggaaccaaactagtactaattaaatatgttaagggactaatctaatactaattaaataagttaagggaccaaaatttaacctttttttgaattaaattaacagaagggaccaaaccgttattttaaataaagttaagggacctaaacagaccttttattacttatggga	1	mtr-MIR2655m,	mtr-MIR2655m	ttcataatcaataaaagatcCGTTTAGGTCCCTTAACTTTAtttaaagtatcggtttggtcccttttgttgatttaattcaaaaaaacgttaagtttagaaccaagctaatactaattaaataagttaagggaacaactaatactaattaaatcagttaagggaccaaaatttaacgtttttttgaattaaattaacataaatgacaaatactttatataaagttaagggatccaaacataccttttattatttatggga	mtr-MIR2655m-p5	aagtatcggtttggtcccttttgt	5'	New	gp1	(((((((((((.(((((((((((((((((((((((((((((.((((((((((((((((((((((((((((((((((((.(((((((((.((..((.((((.....((((((....(((((.((......))))))).))))))....))))..))..)).))))))))).)))))))))))))))))))))))))))))))))))).))))))))))))))))))))))))))))).)))))))))))..........	248	28.7	-129.3	1.7	0	3.5	0	0	0	3	0	3.28534	0	0	0	2.90488	low
197	340	mtr-MIR2655n-p3	TGAATTAAATTAACAGAAAGGACC	24	chr4.4	-	48783144	48783377	cccataagtaataaaaggtccgtttaggtcccttaactttatttaaagtatcagtttggtctcttttgttaatttaattcaaaaaaccgttaagtttagggaccaaactaatactaattaaataagttaagggaccaaaatttaacattttttTGAATTAAATTAACAGAAGGGACCaaaccgttactttaaataaagttaagggacctaaacggaccttttattacttatgag	1	mtr-MIR2655n,	mtr-MIR2655n	cccataagtaatgaactgtcCGTTTAGGTCCCTTAACTTTAtttaaagtatcggtttgatcctttctgttaatttaattcaaaaaaacgttaactttagggaccaaactaatactaattaaataagataagggaccaaaatttaacatttttttgaattaaattaacagaaaggaccaaactgatactttcaataaagttaagggacctaaacgcaccttttattacttatgaga	mtr-MIR2655n-p3	tgaattaaattaacagaaaggacc	3'	New	gp1	..((((((((((((((((((((((((((((((((((((((((((((((((...(((((((((((((((((((((((((((((((((..(((((((((.((..((.((((...............))))..))..)).)))))))))..)))))))))))))))))))))))))))))))))...))))))))))))))))))))))))))))))))))))))))))))))))..	230	29.1	-135	2	0	12	3	10.5	5	7	0	11.264	3.42415	10.6778	5.09551	6.77805	middle
198	341	mtr-MIR2655d-p5	ACTAATTAAATAAGTTAAGGGACC	24	chr8.2	+	1550172	1550438	cccataagtaataaaaggtccgtttaggtcctttaactttatttaaagtattggtttggtcctttctgttaatttaattcaaaaaaatgttaagtttagggaccaaactaatACTAATTAAATAAGTTAAGGGACCaaactaatactaattaaataagttaagggaccgaaatttaacgttttttTGAATTAAATTAACAGAAAGGACCaaaccaatactttaaataaagttaaaggacctaaacggaccttttattacttatggga	3	mtr-MIR2655d,mtr-MIR2655f,mtr-MIR2655j,	mtr-MIR2655d	cccataagtaataaaaagtcCGTTTAGGTCCCTTAACTTTAtttaaagtatcagtttggtcctttctgttaatttaattcaaaaaaacgttaagttgagggaccaaattaatactaattaaataagttaagggaccaaactaatactaattaaataagttaagagaccaaaatttaacatttttttaaattaaattaacagaaaggaccaaaccgatactttaaataaagttaagggacctaaacggactttttattacttatggga	mtr-MIR2655d-p5	actaattaaataagttaagggacc	5'	New	gp1	(((((((((((((((((((((((((((((((((((((((((((((((((((((((((((((((((((((((((((((((((((((((((((((((((.((..((........(((.(((.(((.(((..((........))...))).))).))).)))...))..)).))))))))))))))))))))))))))))))))))))))))))))))))))))))))))))))))))))))))))))))))))))))))))))))))).	266	27.7	-159.9	2.2	0	7	2.5	5.5	5	5.5	0	6.57067	2.85346	5.59312	5.09551	5.32561	low
198	342	mtr-MIR2655f-p3	TGAATTAAATTAACAGAAAGGACC	24	chr8.2	+	1550172	1550438	cccataagtaataaaaggtccgtttaggtcctttaactttatttaaagtattggtttggtcctttctgttaatttaattcaaaaaaatgttaagtttagggaccaaactaatACTAATTAAATAAGTTAAGGGACCaaactaatactaattaaataagttaagggaccgaaatttaacgttttttTGAATTAAATTAACAGAAAGGACCaaaccaatactttaaataaagttaaaggacctaaacggaccttttattacttatggga	3	mtr-MIR2655d,mtr-MIR2655f,mtr-MIR2655j,	mtr-MIR2655f	cccataagtaataaaaggtcCGTTTAGGTCCCTTAACTTTAtttaaaatatcggtctggtcctttttgttaatttcattcaaaaaaacgttaagtttagagaccaaactaatactaattaaataagttaagggaccaaactatactaattaaataagttaagggaccaaaatttaacatttttttgaattaaattaacagaaaggaccaaaccaatactttaaatgaagttaagggacctaaacggaccttttattacttatggga	mtr-MIR2655f-p3	tgaattaaattaacagaaaggacc	3'	New	gp1	(((((((((((((((((((((((((((((((((((((((((((((((((((((((((((((((((((((((((((((((((((((((((((((((((.((..((........(((.(((.(((.(((..((........))...))).))).))).)))...))..)).))))))))))))))))))))))))))))))))))))))))))))))))))))))))))))))))))))))))))))))))))))))))))))))))).	266	27.7	-159.9	2.2	0	12	3	10.5	5	7	0	11.264	3.42415	10.6778	5.09551	6.77805	middle
199	343	mtr-MIR2655b-p5_1ss18TC	AAGTATCGGTTTGGTCCCTTCTGT	24	chr8.2	-	1550193	1550418	ccgtttaggtcctttaactttatttaAAGTATTGGTTTGGTCCTTTCTGTtaatttaattcaaaaaaacgttaaatttcggtcccttaacttatttaattagtattaGTTTGGTCCCTTAACTTATTTaattagtattagtttggtccctaaacttaacatttttttgaattaaattaacagaaaggaccaaaccaatactttaaataaagttaaaggacctaaac	1	mtr-MIR2655b,	mtr-MIR2655b	cCGTTTTGGTCCCTTAACTTTAttgaaagtatcggtttggtcctttctgttaatttaattcaaaaaaacgttaaattttgatcccttatcttatttaattagtattagtttggtcccttaacttatttaattagtattagtttggtccctaaacttaacgtttttttgaattaaattaacataaagatcaaaccgatactttaaataaagttaagggacctaaac	mtr-MIR2655b-p5	aagtatcggtttggtcctttctgt	5'	New	gp1	..((((((((((((((((((((((((((((((((((((((((((((((((((((((((((((((((((.(((((.(((.((..((..((((...((((((((....((((.........))))...))))))))....)))).))..)).))).))))).))))))))))))))))))))))))))))))))))))))))))))))))))))))))))))))))))	224	26.5	-116.4	1.9	0	3.5	0	0	0	3	0	3.28534	0	0	0	2.90488	low
199	344	mtr-MIR2655b-p3_1ss1GA	ATTTGGTCCCTTAACTTATTT	21	chr8.2	-	1550193	1550418	ccgtttaggtcctttaactttatttaAAGTATTGGTTTGGTCCTTTCTGTtaatttaattcaaaaaaacgttaaatttcggtcccttaacttatttaattagtattaGTTTGGTCCCTTAACTTATTTaattagtattagtttggtccctaaacttaacatttttttgaattaaattaacagaaaggaccaaaccaatactttaaataaagttaaaggacctaaac	1	mtr-MIR2655b,	mtr-MIR2655b	cCGTTTTGGTCCCTTAACTTTAttgaaagtatcggtttggtcctttctgttaatttaattcaaaaaaacgttaaattttgatcccttatcttatttaattagtattagtttggtcccttaacttatttaattagtattagtttggtccctaaacttaacgtttttttgaattaaattaacataaagatcaaaccgatactttaaataaagttaagggacctaaac	mtr-MIR2655b-p3	gtttggtcccttaacttattt	3'	New	gp1	..((((((((((((((((((((((((((((((((((((((((((((((((((((((((((((((((((.(((((.(((.((..((..((((...((((((((....((((.........))))...))))))))....)))).))..)).))).))))).))))))))))))))))))))))))))))))))))))))))))))))))))))))))))))))))))	224	26.5	-116.4	1.9	1.25	0	0	0	0	0	1.46595	0	0	0	0	0	low
200	345	mtr-MIR2655o-p3	ATAAAGTTAAGGGACCTAAACGGA	24	chr4.4	+	48783144	48783378	ctcataagtaataaaaggtccgtttaggtcccttaactttatttaaagtaacggtttggtcccttctgttaatttaattcaaaaaaatgttaaattttggtcccttaacttatttaattagtattagtttggtccctaaacttaacggttttttgaattaaattaacaaaagagaccaaactgatactttaaATAAAGTTAAGGGACCTAAACGGAccttttattacttatggga	1	mtr-MIR2655o,	mtr-MIR2655o	ctcataagtaataaaaggtgCGTTTAGGTCCCTTAACTTTAttgaaagtatcagtttggtcctttctgttaatttaattcaaaaaaatgttaaattttggtcccttatcttatttaattagtattagtttggtccctaaagttaacgtttttttgaattaaattaacagaaaggatcaaaccgatactttaaataaagttaagggacctaaacggacagttcattacttatggga	mtr-MIR2655o-p3	ataaagttaagggacctaaacgga	3'	New	gp1	((((((((((((((((((((((((((((((((((((((((((((((((((.((((((((((.(((.((((((((((((((((((((..(((((.(((.((..((..((((((((.....))))..)))).))..)).))).)))))..)))))))))))))))))))).))).)))))))))).)))))))))))))))))))))))))))))))))))))))))))))))))).	234	28.9	-132.8	2	0	9	3	7.5	2.5	2.5	0	8.448	3.42415	7.62698	2.54776	2.42073	low
201	346	mtr-MIR2655k-p5	ACTAATTAAATAAGTTAAGGGACC	24	chr8.3	+	1341198	1341464	ctcataagtaataaaaggtccgtttaggtcctttaactttatttaaagtattggtttggtcctttctgataatttaattcaaaaaaatgttaagtttagggaccaaactaatACTAATTAAATAAGTTAAGGGACCaaactaatactaattaaataagttaagggaccgaaatttaacgtttttttgaattaaattaacagaaaggaccaaaccaatactttaaataaagttaaaggacctaaacggaccttttattacttatggga	1	mtr-MIR2655k,	mtr-MIR2655k	ctcataagtaataaaaggttCGTTTAGGTCCCTTAACTTTAttttaagtatcggtttaatcatttatgttaatttaattcaaaaaagcgttaagtttagggacgaaactaatactaattaaataagttaagggaccaatctaacactaattaaataagttaagggaccaaaacttgccgttttttgaattaaattaatagaaaagatcaaaccgatactttaaataaaattaaaggacctaaacgaactttttattacttatggga	mtr-MIR2655k-p5	actaattaaataagttaagggacc	5'	New	gp1	((((((((((((((((((((((((((((((((((((((((((((((((((((((((((((((((((((.((((((((((((((((((((((((((((.((..((........(((.(((.(((.(((..((........))...))).))).))).)))...))..)).)))))))))))))))))))))))))))).)))))))))))))))))))))))))))))))))))))))))))))))))))))))))))))))))))).	266	27.3	-152.7	2.1	0	7	2.5	5.5	5	5.5	0	6.57067	2.85346	5.59312	5.09551	5.32561	low
202	347	mtr-miR2661	TAGGTTTGAGAAAATGGGCAG	21	chr3.4	+	56866445	56866578	gtaggttcttgattttgcaaTAGGTTTGAGAAAATGGGCAGttcattcatgagaatgagactatttgtcaaaaatctcaagtcttttagaattgtccattttctcagatctattacaaacaccgttgaagaacc	1	mtr-MIR2661,	mtr-MIR2661	gtagcttcttgattttgcaaTAGGTTTGAGAAAATGGGCAGttcattcattagaatgagagagactatttgtcaaaaatctcaagtcttttagaattgtccattttctcagatctattacaaacaccgttgaagaacc	mtr-miR2661	TAGGTTTGAGAAAATGGGCAG	5'	Yes	gp1	...((((((((((((((.((((((((((((((((((((((((((......((((.(((((...(((....))).)))))..))))...)))))))))))))))))))))))))).))))....))).)))))))	131	34.3	-51.2	1.1	305	606	469	570	571	540	357.691	568.832	535.309	579.651	581.907	522.878	high
203	348	mtr-MIR2662-p3_1ss10GA	AAAATGAAAACCGCAAACCAAACC	24	chr5.4	+	30749052	30749385	tttcatcttcaccaaacaacataaaccaaataaaaaaataattctattatgtaagaaatataaaagactaagactttatcattctctaaaagttcaagtagcacataaatatatttttgaaataaaaagcaaagaagaaacataacaagagaaaaaatatgtcattttataaaagtttcaactgagtttctatgagtattggtctaggtgacatagatttaattagtgtttttcttatgttgcggtttggtttggtttggtttggtttgatatgtAAAATAAAAACCGCAAACCAAACCaaactatgcggttgagtaaaaaaatgatccgaata	1	mtr-MIR2662,	mtr-MIR2662	tttcatttcacattttcattttcaccaaacaacatagaccaaataaaaaattaattctattatgtaagaaatgtaaaataccaagattttatcattctataaaagttcaagtagcacataaatacatttttgaaataaaaagcaaagaagaaacttaacaagagaacaaatatgtcattttataaaagtttccattgagtttctattagtattggtctaggtgacatagattttaattagtgtttttattatgttgcggtttggtttggtatggttcggttggtaaaatgaaagccgcaaaccaaaccaaaccatgcggttGAGTAAAAATGTGAACCGAATa	mtr-MIR2662-p3	aaaatgaaagccgcaaaccaaacc	3'	New	gp1	..((((((..(((((....(((((((((..............(((.((((((.....)))))).)))....(((.......((((((....(((.....)))...........((((((..........))))))............)))))).......)))...................)).)))..))))....)))))..)))))).....((((.((((...(((((((((...(((((((((((((((((((...((((((..(((.....))).))))))))))))))))))))))..)))..)))).)))))..))))..)))).	117	26.6	-62.9	0.7	8	8	13	0	0	7	9.38205	7.50934	14.838	0	0	6.77805	middle
204	349	mtr-miR2666_1ss1CT	TGAAAGTGAGGATATCAAGGA	21	chr4.2	+	86676406	86676826	ttgaccttttgttttatattaagttcctttgtattttctttcttttcttctaaagtgtcccagttctgcaaaaatactcttgtgcgtgtgaaagaatcatttcctgtttgcttaatatgtgacatatagttgacatcttaagcttttattttaaatctccgatttcttgccatgttgtcaatgtactaaatgataactgcacctataatttgtttctgaataagctactggacagcaccctgattctttgcaagtttttggaaacaattcaacttccacatacacatatacaattatacttctcttactcaaatttggcatttacttttggcacatacacaaacgtaaatatgcatttttcattggtttatatttttcataggagCGAAAGTGAGGATA…	1	mtr-MIR2666,	mtr-MIR2666	ttgaccttttgtttatattaagttcctttgtattttctttcttttcttctaaagtgccccagttctgcataaatattcttgtgcgtgtgaaagaatcattccctgtttgcttaatatgtgacatatagttgatatcttaagcttttattttaaatctccgatttcttgccatgttgttaatgtactatatgataattgcacctataatttgtttctgaataagctactggacaacatttcctgattctttgcaagtttttggaaacaattcaacttccacatacacatatacaattatacttctcttactcaaatttaccatttacttttggcacatacgcaaacgtaaatatgcatttttcattggtttatttttttcataggaaCGAAAGTGAGGAT…	mtr-miR2666	CGAAAGTGAGGATATCAAGGA	3'	Diff	gp1	.....(((((.....(((......(((((..(((..((...(((((((((((((((((.(((((..((((....(((..(((((..((((..((((.............((((((.(((((((.....))).)))).))))))........................(((((.(((((((..........)))))))............(((((((..((...((....((((((....))).)))...)).....))..)))))))................................................))))).....))))..))))..)))))..)))....))))......)))))...))))))....)))))).))))).))..)))…	415	31.4	-76.5	0.6	74	121	105	122	107	63	86.784	113.579	119.845	124.066	109.044	61.0024	middle
205	350	mtr-MIR2669a-p5_2ss1TC17CT	CATGAGAATGACTTTTTTGGTGAA	24	chr4.4	+	27718934	27719047	atggtgaagtCATGAGAATGACTTTTCTGGTGAAgttaacaatataacatcaaaaatgtagtgagtaacactccactgtttgtaccacTAGTTCAGTCCTCATAGTATCATCaa	2	mtr-MIR2669a,mtr-MIR2669b,	mtr-MIR2669a	atggtgaaattatgagaatgacttttctggtgaagtcaacactatagtattaaaagtgtagtgagtagcaccccactgtttatAAAGTTCAGTCTTCATAGTATCatcaa	mtr-MIR2669a-p5	tatgagaatgacttttctggtgaa	5'	New	gp1	.((((((....(((((...((((...((((((..((((......))))..((((..((.((((.....)))).))...))))...))))))...)))))))))....)))))).	112	35.1	-27.6	0.7	6	24	0	9	12	17	7.03654	22.528	0	9.15238	12.2292	16.461	middle
205	351	mtr-miR2669a_L-1R+3_1ss12TC	AAGTTCAGTCCTCATAGTATCATC	24	chr4.4	+	27718934	27719047	atggtgaagtCATGAGAATGACTTTTCTGGTGAAgttaacaatataacatcaaaaatgtagtgagtaacactccactgtttgtaccacTAGTTCAGTCCTCATAGTATCATCaa	2	mtr-MIR2669a,mtr-MIR2669b,	mtr-MIR2669a	atggtgaaattatgagaatgacttttctggtgaagtcaacactatagtattaaaagtgtagtgagtagcaccccactgtttatAAAGTTCAGTCTTCATAGTATCatcaa	mtr-miR2669a	AAAGTTCAGTCTTCATAGTATC	3'	Diff	gp1	.((((((....(((((...((((...((((((..((((......))))..((((..((.((((.....)))).))...))))...))))))...)))))))))....)))))).	112	35.1	-27.6	0.7	17	35	25	26	33	21	19.9369	32.8534	28.5346	26.4402	33.6304	20.3341	middle
206	352	mtr-MIR2670a-p5	TGGGGTAAAATAGTGAGTAGC	21	chr6.1	-	741044	741264	agtgatcaaacttcttCGGGGTAAAATAGTGAGTAGCcgacttgaggaagtgatcaacccttaggataagattaaatttgttttttttaccccagaaactttttaccgtgggtaaaaagaatcttcttggggtataaaaagaaccagatttaaatttagcccaaggattgatgatgtattttccccaAGAAGGTTGCTCACTATTTTACCCcaagatgatt	1	mtr-MIR2670a,	mtr-MIR2670a	agtgatcaaacttttttggggtaaaatagtgagtagccgatttggtgaagtgatcaaccattctgataagtttaaatctgtttttttttactcctgaaactttttaccatgggtaaaaggatttttcttggggtataaaaaaaaaaccagatttaaatttagcccaagggttgatgaggtattttcctCAAGAAGGTTGCTCACTATTTtaccccaagatgatttcac	mtr-MIR2670a-p5	tggggtaaaatagtgagtagc	5'	New	gp1	...(((((....((((.(((((((((((((((((((((..((((.((((((.(((((.((((.((.(((..((((((((((((((((((((((((((.(((((((((...)))))))))....))).)))))))..))))))).)))))))))..))).)).)))).))))).)).....)))).))))..))))))))))))))))))))))))))))))	218	36.2	-95.2	1.2	6	13.3333	10	6.66667	4.66667	0	7.03654	12.5156	11.4138	6.77954	4.75581	0	middle
206	353	mtr-MIR2670a-p3_1ss7TC	AGAAGGCTGCTCACTATTTTACCC	24	chr6.1	-	741044	741264	agtgatcaaacttcttCGGGGTAAAATAGTGAGTAGCcgacttgaggaagtgatcaacccttaggataagattaaatttgttttttttaccccagaaactttttaccgtgggtaaaaagaatcttcttggggtataaaaagaaccagatttaaatttagcccaaggattgatgatgtattttccccaAGAAGGTTGCTCACTATTTTACCCcaagatgatt	1	mtr-MIR2670a,	mtr-MIR2670a	agtgatcaaacttttttggggtaaaatagtgagtagccgatttggtgaagtgatcaaccattctgataagtttaaatctgtttttttttactcctgaaactttttaccatgggtaaaaggatttttcttggggtataaaaaaaaaaccagatttaaatttagcccaagggttgatgaggtattttcctCAAGAAGGTTGCTCACTATTTtaccccaagatgatttcac	mtr-MIR2670a-p3	AGAAGGTTGCTCACTATTTtaccc	3'	New	gp1	...(((((....((((.(((((((((((((((((((((..((((.((((((.(((((.((((.((.(((..((((((((((((((((((((((((((.(((((((((...)))))))))....))).)))))))..))))))).)))))))))..))).)).)))).))))).)).....)))).))))..))))))))))))))))))))))))))))))	218	36.2	-95.2	1.2	8	15.3333	6.66667	23.3333	7.66667	17	9.38205	14.3929	7.60923	23.7284	7.81312	16.461	middle
207	354	mtr-MIR2670d-p5_1ss19AG	ATAGTGAGTAGCCGACTTGGGG	22	chr1.2	-	59013808	59014024	tgatcaaacttcgtcggggtaaaGTAGTGAGTAGCCGACTTGGGGaagtgatcgacccttgggataattttaaatatgcttttttaaccgcagaaactttttaccgtgggtaaaaagaacttcttggggtaaaaaaaaaccagatttaaatttagcccaagagttgatgatgtattttccCCAAGAAGGTTGCTCACTATTTtaccccacgaagatt	1	mtr-MIR2670d,	mtr-MIR2670d	tgatcaatcttcttcggggtaaaatagtgagtagccgacttagggaagtaatcaacccttgggataagtttaaatatccttttttaaaccccagaaactttttaccgttggtaaaaataatcttcttcgggtaaaaaaaaaaccagatttaaatttagctcaatggttgatgatgtattttcccCAAGAAGGTTGCTCACTATTTtaccccacaaagatttttc	mtr-MIR2670d-p5	atagtgagtagccgacttaggg	5'	New	gp1	........((((((.(((((((((((((((((((((..(((((((((((.((((((.((((((.(((.(((((((.((.((((((.(((.(((((.(((((((((...)))))))))...))).)).))).))))))...)).))))))).))).)))))).)))))).)).....)))))))))..)))))))))))))))))))))))))))...	206	38.7	-103.8	1.2	50.5	107.833	64	127.667	69.6667	137.5	59.2242	101.22	73.0486	129.828	70.9974	133.14	middle
207	355	mtr-miR2670a_L+1_1ss10TC	CCAAGAAGGCTGCTCACTATTT	22	chr1.2	-	59013808	59014024	tgatcaaacttcgtcggggtaaaGTAGTGAGTAGCCGACTTGGGGaagtgatcgacccttgggataattttaaatatgcttttttaaccgcagaaactttttaccgtgggtaaaaagaacttcttggggtaaaaaaaaaccagatttaaatttagcccaagagttgatgatgtattttccCCAAGAAGGTTGCTCACTATTTtaccccacgaagatt	1	mtr-MIR2670d,	mtr-MIR2670d	tgatcaatcttcttcggggtaaaatagtgagtagccgacttagggaagtaatcaacccttgggataagtttaaatatccttttttaaaccccagaaactttttaccgttggtaaaaataatcttcttcgggtaaaaaaaaaaccagatttaaatttagctcaatggttgatgatgtattttcccCAAGAAGGTTGCTCACTATTTtaccccacaaagatttttc	mtr-miR2670a	CAAGAAGGTTGCTCACTATTT	3'	Diff	gp1	........((((((.(((((((((((((((((((((..(((((((((((.((((((.((((((.(((.(((((((.((.((((((.(((.(((((.(((((((((...)))))))))...))).)).))).))))))...)).))))))).))).)))))).)))))).)).....)))))))))..)))))))))))))))))))))))))))...	206	38.7	-103.8	1.2	104	376.333	152.667	154.333	67.6667	174	121.967	353.252	174.251	156.946	68.9592	168.483	middle
208	356	mtr-MIR2670b-p5_1ss6AC	TCGGGCTAAAATAGTGAGTAGC	22	chr2.2	-	41461022	41461243	tgatcaaacttctTCGGGCTAAAATAGTGAGTAGCcgacttggggaagtgatcaacccttgggataagtttaaatctgcttttttttactccagaaactttttaccgtgggtaaaaagattcttcttggggtataaaaaaaccatatttaaatttagctcaagggttgatgatgtattttccCCAAGAAAGTTGCTCACTATTTtaccccaagaagattgat	1	mtr-MIR2670b,	mtr-MIR2670b	tgatcaaacttcttcgggataaaatagtgagtagctgacttagggaagtgatcgaccattgggataagtttaaatctgctattttttactccataaactttttaccgtgggtaaaaagattcttgttggggtataaaaaaaaccagacttaaatttagcccaagggttggtgatgtattttctcCAAGAAGGTTGCTCACTATTTtaccccatgaagattgatt	mtr-MIR2670b-p5	tcgggataaaatagtgagtagc	5'	New	gp1	..(((((.((((((.(((.((((((((((((((((...(((((((((((.(((((((((((((.(((((((((((.((.(((((((((((((((((.(((((((((...))))))))).)))....))))))).))))))).)).))))))))))).))))))))))))).)).....)))))))))...))))))))))))))))))).)))))).)))))	220	36	-106.9	1.3	8	13.5	6	11.5	3	5	9.38205	12.672	6.84831	11.6947	3.05731	4.84146	middle
208	357	mtr-miR2670a_L+1	CCAAGAAGGTTGCTCACTATTT	22	chr2.2	-	41461022	41461243	tgatcaaacttctTCGGGCTAAAATAGTGAGTAGCcgacttggggaagtgatcaacccttgggataagtttaaatctgcttttttttactccagaaactttttaccgtgggtaaaaagattcttcttggggtataaaaaaaccatatttaaatttagctcaagggttgatgatgtattttccCCAAGAAAGTTGCTCACTATTTtaccccaagaagattgat	1	mtr-MIR2670b,	mtr-MIR2670b	tgatcaaacttcttcgggataaaatagtgagtagctgacttagggaagtgatcgaccattgggataagtttaaatctgctattttttactccataaactttttaccgtgggtaaaaagattcttgttggggtataaaaaaaaccagacttaaatttagcccaagggttggtgatgtattttctcCAAGAAGGTTGCTCACTATTTtaccccatgaagattgatt	mtr-miR2670a	CAAGAAGGTTGCTCACTATTT	3'	Diff	gp1	..(((((.((((((.(((.((((((((((((((((...(((((((((((.(((((((((((((.(((((((((((.((.(((((((((((((((((.(((((((((...))))))))).)))....))))))).))))))).)).))))))))))).))))))))))))).)).....)))))))))...))))))))))))))))))).)))))).)))))	220	36	-106.9	1.3	0	0	0	0	0	0	0	0	0	0	0	0	low
209	358	mtr-MIR2670c-p5_1ss16TC	ATAGTGAGTAGCCGACTTGGGG	22	chr1.3	-	3902144	3902365	tgatcagacttcttcggggcaaaATAGTGAGTAGCCGACTTGGGGaagtgatcaacccttggggtaagtttaaatttgcttttttttaccccagaaactttttaccgtgggtaaaaagaatcttcttggggtataaaaaaaccagatttaaatttagcccaagggttgatgatgtatttccccaAGAAGGCTGCTCACTATTTTACCCcaagaaggctggtc	1	mtr-MIR2670c,	mtr-MIR2670c	tgatcatacttcttcggggcaaatagtgagtagccgatttggggaagtgatcaacccctaggataagtttaaatttgttttttttaccccagagactttttaccgtggctaaaaagatcttcttgggggtataaaaagaaccatatttaaatttagcccaagggttgatgatgtattttcctCAAGAAGGTTGCTCACTATTTtaccccaagaaagctggtc	mtr-MIR2670c-p5	atagtgagtagccgatttgggg	5'	New	gp1	.((((((.((((((.((((.((((((((((((((((..(((((((((((((((((((((((((.((((((((((((((.(((((((((((((((((.(((((((((...)))))))))....))).))))))).))))))).)))))))))))))).)))))))))))))....))))))))))))..)))))))))))))))).)))))))))).))))))	221	41	-133.3	1.5	50.5	107.833	64	127.667	69.6667	137.5	59.2242	101.22	73.0486	129.828	70.9974	133.14	middle
209	359	mtr-MIR2670c-p3_1ss7TC	AGAAGGCTGCTCACTATTTTACCC	24	chr1.3	-	3902144	3902365	tgatcagacttcttcggggcaaaATAGTGAGTAGCCGACTTGGGGaagtgatcaacccttggggtaagtttaaatttgcttttttttaccccagaaactttttaccgtgggtaaaaagaatcttcttggggtataaaaaaaccagatttaaatttagcccaagggttgatgatgtatttccccaAGAAGGCTGCTCACTATTTTACCCcaagaaggctggtc	1	mtr-MIR2670c,	mtr-MIR2670c	tgatcatacttcttcggggcaaatagtgagtagccgatttggggaagtgatcaacccctaggataagtttaaatttgttttttttaccccagagactttttaccgtggctaaaaagatcttcttgggggtataaaaagaaccatatttaaatttagcccaagggttgatgatgtattttcctCAAGAAGGTTGCTCACTATTTtaccccaagaaagctggtc	mtr-MIR2670c-p3	AGAAGGTTGCTCACTATTTtaccc	3'	New	gp1	.((((((.((((((.((((.((((((((((((((((..(((((((((((((((((((((((((.((((((((((((((.(((((((((((((((((.(((((((((...)))))))))....))).))))))).))))))).)))))))))))))).)))))))))))))....))))))))))))..)))))))))))))))).)))))))))).))))))	221	41	-133.3	1.5	8	15.3333	6.66667	23.3333	7.66667	17	9.38205	14.3929	7.60923	23.7284	7.81312	16.461	middle
210	360	mtr-MIR2670f-p3_2ss13TG17AG	TTTTCCCCAACAGGACGGATC	21	chr6.2	+	82707309	82707510	tgggggaagtagtggtccgttaggttggggaaaaagacatcatcccttgaggtaaaattaggtttgcttccttttactcccaaaatctttttacagtgggtaaaaagaatcatcatgggggtataaaaggaaccaaatttaaatttaactcaagggatcttgatgtcgTTTTCCCCAACAGGACGGATCactattttcccca	1	mtr-MIR2670f,	mtr-MIR2670f	tgggggaagtAGTGGTCTGTTAGGTTGGGGAaaaagacatcatcccgtgaggtaaaattaggtttgcttccttttactcccaaaatctttttaccgtggggtaaaaagaatcatcatgggggtataaaaggaaccaaatttaaatttaactcaaggggtcttgatgtcgttttccccaacatgacagatcactattttcccca	mtr-MIR2670f-p3	ttttccccaacatgacagatc	3'	New	gp1	.((((((((((((((((((((..(((((((((((.((((((((((((((((.((((.(((..((((.(((((((((((((((...(((((((((.....))))))))).......))))))))..))))))).))))..))).)))).)))))))))...))))))).)))))))))))..)))))))))))))))))))).	200	40.1	-115.7	1.4	0	0	5	60	11	34	0	0	5.70692	61.0158	11.2101	32.9219	middle
211	361	mtr-MIR2670e-p5	AGTGGTCCGTTAGGTTGGGGA	21	chr4.1	-	68627280	68627485	tttgggggaagtAGTGGTCCGTTAGGTTGGGGAaaaagacatcatcccttgaggtaaaattatgtttgcttccttttactcccaaaatctttttaccgtgggtaaaaagaatcatcataggggtataaaaggaaccaaatttaaatttaactcaagggatcttgatgtcgttttcCCCAACAGGACGGATCACTACtttgcccaag	1	mtr-MIR2670e,	mtr-MIR2670e	tttgagggaagtagtggtccgttaggttggggaaaaagacatcatcccttgaggtaaaattaggtttgcttccttttactcccaaaatctttttaccgtgggtaaaaagaatcatcatgggggtataaaaggaaccaaatttaaatttaaatcaaggggtcttgatgtattttTCTCAACAGGACGGATCACTActttacccaag	mtr-MIR2670e-p5	agtggtccgttaggttgggga	5'	New	gp1	.(((((..(((((((((((((((..(((((((((((.((((((((((((((((.((((.(((..((((.(((((((((..(((....((((((((((...))))))))))..........)))..))))))))).))))..))).)))).)))))))))...))))))).)))))))))))..)))))))))))))))..))))).	204	39.8	-109.4	1.3	48	73	151	110	5	85	56.2923	68.5227	172.349	111.862	5.09551	82.3049	middle
211	362	mtr-miR2670e_L-1R+1_1ss3TC	CCCAACAGGACGGATCACTAT	21	chr4.1	-	68627280	68627485	tttgggggaagtAGTGGTCCGTTAGGTTGGGGAaaaagacatcatcccttgaggtaaaattatgtttgcttccttttactcccaaaatctttttaccgtgggtaaaaagaatcatcataggggtataaaaggaaccaaatttaaatttaactcaagggatcttgatgtcgttttcCCCAACAGGACGGATCACTACtttgcccaag	1	mtr-MIR2670e,	mtr-MIR2670e	tttgagggaagtagtggtccgttaggttggggaaaaagacatcatcccttgaggtaaaattaggtttgcttccttttactcccaaaatctttttaccgtgggtaaaaagaatcatcatgggggtataaaaggaaccaaatttaaatttaaatcaaggggtcttgatgtattttTCTCAACAGGACGGATCACTActttacccaag	mtr-miR2670e	TCTCAACAGGACGGATCACTA	3'	Diff	gp1	.(((((..(((((((((((((((..(((((((((((.((((((((((((((((.((((.(((..((((.(((((((((..(((....((((((((((...))))))))))..........)))..))))))))).))))..))).)))).)))))))))...))))))).)))))))))))..)))))))))))))))..))))).	204	39.8	-109.4	1.3	27	82	26	38	9	38	31.6644	76.9707	29.676	38.6434	9.17192	36.7951	middle
212	363	mtr-MIR2671h-p5	TTTTGGTTTCGTTTTGGTCCC	21	chr8.3	-	54996284	54996614	tcgttttggtctcttaactattaaaagtttcgtttcggtcccttaacttatttttgggttttcttttggtcccttaactattaagagtttcgttttggtcccttaacttattttttggtttcgttttgatctcttaacttattTTTTGGTTTCGTTTTGGTCCCttaactctaatactttcatcctaacataaAGGACCAAAGTGGTTGACAGAGGAagagttaacggaccaaaacaaaaccaaaaaaataagttaagggaccaaaacgaaaccaaaaagtaagttaagggaacaaaacgaaactttttatagttaagggaccaaaacgaa	1	mtr-MIR2671h,	mtr-MIR2671h	tcgttttggttccttaactaTTAAAAGTTTCGTTTCGGTCCcataacttattttttggtttcattttggtcccttaactattaaaagtttcgttttggtcctttaacttactttttggtttcgttttggtcccttaacttattttttggtttcattttggtcccttaactctaatacattcatcctaacataaaggaccaaagtggttgacagaggatgagttaagggaccaaaacaaaaccaaaaagtaagttaaaggatcaaaacgaaaccaaaaagtaagttaagggaccaaaacgaaacttttaatagttaaggtaccaaaacgaa	mtr-MIR2671h-p5	ttttggtttcgttttggtccc	5'	New	gp1	(((((((((((((((((((((..........(((..((..((..(((..(....)..))).......))..))..)))....(((((((((((((((.((((((((((((((((((((((((((((((.(((((((((((((((((((((((.((((((((((.((((((((..((((((..((((.......))))..))))))............)))))))).)))))))))).))))).)))))))))))))))))).)))))))))))))))))))))))))))))).))))))))))))))).))))))))))))))))))))).	226	33.2	-161.7	1.5	74.4167	45.1667	43.1667	59.3333	53.6667	35.6667	87.2726	42.3965	49.2698	60.3379	54.6918	34.5358	middle
212	364	mtr-MIR2671h-p3_2ss8AG19AG	AGGACCAGAGTGGTTGACGGAGGA	24	chr8.3	-	54996284	54996614	tcgttttggtctcttaactattaaaagtttcgtttcggtcccttaacttatttttgggttttcttttggtcccttaactattaagagtttcgttttggtcccttaacttattttttggtttcgttttgatctcttaacttattTTTTGGTTTCGTTTTGGTCCCttaactctaatactttcatcctaacataaAGGACCAAAGTGGTTGACAGAGGAagagttaacggaccaaaacaaaaccaaaaaaataagttaagggaccaaaacgaaaccaaaaagtaagttaagggaacaaaacgaaactttttatagttaagggaccaaaacgaa	1	mtr-MIR2671h,	mtr-MIR2671h	tcgttttggttccttaactaTTAAAAGTTTCGTTTCGGTCCcataacttattttttggtttcattttggtcccttaactattaaaagtttcgttttggtcctttaacttactttttggtttcgttttggtcccttaacttattttttggtttcattttggtcccttaactctaatacattcatcctaacataaaggaccaaagtggttgacagaggatgagttaagggaccaaaacaaaaccaaaaagtaagttaaaggatcaaaacgaaaccaaaaagtaagttaagggaccaaaacgaaacttttaatagttaaggtaccaaaacgaa	mtr-MIR2671h-p3	aggaccaaagtggttgacagagga	3'	New	gp1	(((((((((((((((((((((..........(((..((..((..(((..(....)..))).......))..))..)))....(((((((((((((((.((((((((((((((((((((((((((((((.(((((((((((((((((((((((.((((((((((.((((((((..((((((..((((.......))))..))))))............)))))))).)))))))))).))))).)))))))))))))))))).)))))))))))))))))))))))))))))).))))))))))))))).))))))))))))))))))))).	226	33.2	-161.7	1.5	156.167	266.333	155.167	217.167	152.5	187.667	183.145	249.998	177.105	220.843	155.413	181.716	middle
213	365	mtr-MIR2671d-p5	TTTTGGTTTCGTTTTGGTCCC	21	chr7.2	+	48341510	48341868	tcgttttggtctcttaactattaaaagtttcgtttcggtcccttaacttttttttgggttttcttttggtcccttaactattaaaagtttcgttttggtcccttaacttattTTTTGGTTTCGTTTTGGTCCCttaacttattttttagtttcgttttggtcccttaactctaatacattcatcctaacatacaggaccaaagtggttgacggaggaagagttaagggaccaaaacgaaaccaaaaaataagttaaaggaccaaaacgaaacttttaatagttaagggaccaaaataaaaccaAAAAGTAAGTTAAGGGACCAAAACgaaacttttaatagttaagggaccaaaacgaa	1	mtr-MIR2671d,	mtr-MIR2671d	tcgttttggttccttaactaTTAAAAGTTTCGTTTCGGTCCcataacttatttttgggttttcttttggtcccttaactattaaaagtttcgttttggtcccttaacttattttttggtttcgttttggtcccttaacttattttttttgtttcattttggtcccttaactctaatacattcatcctaacataaaggaccaaagaggctgacgaaggaagagttaagggaccaaaatgaaaccaaaaagtaagttaaaggaccaaaaagaaacttttaatagttaagggaccaaaatgaaaccaaaaagtaagttaagggaccaaaacaaaacttttaatagttaagggaccaaaacgaa	mtr-MIR2671d-p5	ttttggtttcgttttggtccc	5'	New	gp1	(((((((((((((((((((((((((((((((((((.(((((((((((((((((((.((((((.((((((((((((((((((((((((((((((((((((((.((((((((((((((((((((((((((((((((((((((.((..(..(((((..((((((((...............................))))))))..))..)))..)..)))))))))))))))))))))))))))))))))))))))).)))))))))))))))))))))))))))))))))))))).)))))))))))).))))))))))))).))))))))))))))))))))))))))))))))))).	358	33.4	-220.765	1.8	74.4167	45.1667	43.1667	59.3333	53.6667	35.6667	87.2726	42.3965	49.2698	60.3379	54.6918	34.5358	middle
213	366	mtr-MIR2671d-p3_1ss5GA	AAAAATAAGTTAAGGGACCAAAAC	24	chr7.2	+	48341510	48341868	tcgttttggtctcttaactattaaaagtttcgtttcggtcccttaacttttttttgggttttcttttggtcccttaactattaaaagtttcgttttggtcccttaacttattTTTTGGTTTCGTTTTGGTCCCttaacttattttttagtttcgttttggtcccttaactctaatacattcatcctaacatacaggaccaaagtggttgacggaggaagagttaagggaccaaaacgaaaccaaaaaataagttaaaggaccaaaacgaaacttttaatagttaagggaccaaaataaaaccaAAAAGTAAGTTAAGGGACCAAAACgaaacttttaatagttaagggaccaaaacgaa	1	mtr-MIR2671d,	mtr-MIR2671d	tcgttttggttccttaactaTTAAAAGTTTCGTTTCGGTCCcataacttatttttgggttttcttttggtcccttaactattaaaagtttcgttttggtcccttaacttattttttggtttcgttttggtcccttaacttattttttttgtttcattttggtcccttaactctaatacattcatcctaacataaaggaccaaagaggctgacgaaggaagagttaagggaccaaaatgaaaccaaaaagtaagttaaaggaccaaaaagaaacttttaatagttaagggaccaaaatgaaaccaaaaagtaagttaagggaccaaaacaaaacttttaatagttaagggaccaaaacgaa	mtr-MIR2671d-p3	aaaagtaagttaagggaccaaaac	3'	New	gp1	(((((((((((((((((((((((((((((((((((.(((((((((((((((((((.((((((.((((((((((((((((((((((((((((((((((((((.((((((((((((((((((((((((((((((((((((((.((..(..(((((..((((((((...............................))))))))..))..)))..)..)))))))))))))))))))))))))))))))))))))))).)))))))))))))))))))))))))))))))))))))).)))))))))))).))))))))))))).))))))))))))))))))))))))))))))))))).	358	33.4	-220.765	1.8	69.1667	96.8333	68.6667	88.1667	43	52.6667	81.1157	90.8943	78.375	89.6594	43.8214	50.9967	middle
214	367	mtr-MIR2671j-p3_1ss19AT	AAGTTTCGTTTCGGTCCCTTAACT	24	chr5.2	+	70908979	70909080	tggcttaattacttttttggtcccttaatttattttttggtttcgttttggtctcttaactattaaAAGTTTCGTTTCGGTCCCTTAACTtatttttgggtt	1	mtr-MIR2671j,	mtr-MIR2671j	tggcttaattacttttttggtcccttaacttaatttttggtttcgttttggttccttaactaTTAAAAGTTTCGTTTCGGTCCcataacttatttttgggtt	mtr-MIR2671j-p3	AAGTTTCGTTTCGGTCCcataact	3'	New	gp1	.....................(((..((..((..((..((..(((...(((...(((.........)))..)))...)))..))..))..))..)).)))..	79	30.4	-10.6	0.3	0	1.5	0	0	0	0	0	1.408	0	0	0	0	low
215	368	mtr-MIR2671g-p5	TTTTGGTTTCGTTTTGGTCCC	21	chr4.1	-	48134047	48134432	ttcgttttggtcccttaactattaaaagtttcgtttcggtcccttaacttatttttgagttttcttttggtccttaactattaaaagtttcgttttggtcccttaacttattTTTTGGTTTCGTTTTGGTCCCttaacttattttttggtttcattttggtcccttaactctaatacattcatcctaacataaaggaccaaagtggttgacggaggaagagTTAAGGGACCAAAACGAAACCaaaaaataagttaagggaccaaaacgaaacttttaatagttaagggaccaaaacgaaaccaaaaagtaagttaagagaccaaaaagaaacttttaatagttaagggaccaaaacgaaaccaaaaaataagttaagggatcaaaa	7	mtr-MIR2671e,mtr-MIR2671g,mtr-MIR2671f,mtr-MIR2671i,mtr-MIR2671c,mtr-MIR2671b,mtr-MIR2671a,	mtr-MIR2671g	tcgttttggttccttaactaTTAAAAGTTTCGTTTCGGTCCcataatttatttttgagttttcttttggtcccttaactattaaaagtttcgttttagtcccttaacttatttttttggtttcgttttggtcccttaacttattttttggtttcattttggtcccttaactctaatacattcatcctaacataaaggaccaaagtagttgacggaggaagagttaatggaccaaaacgaaatcaaaaagtaagttaaaggaccaaaacgaaacttttaatagttaagggaccaaaacgaaaccaaaaagtaagttaagggaccaaaacgaaacttttaatagttaagggaccaaaacgac	mtr-MIR2671g-p5	ttttggtttcgttttggtccc	5'	New	gp1	((((((((((((((((((((((((((((((((.(((.((((.((((((((((((((..((((..(((((((((((((((((((((((((((((((((((((((((((((((((((((((((((((((((((((((((((..(..(..(...((((((((((((.(((.......................))).))))))))))))....)..)..)..)))))))))))))))))))))))))))))))))))))))))))))))))))))))))))))))))))).)))))))..))))..)))))))))))))).)))).))).))))))))))))))))))))))))))))))))...........................	359	32.6	-218.3	1.7	74.4167	45.1667	43.1667	59.3333	53.6667	35.6667	87.2726	42.3965	49.2698	60.3379	54.6918	34.5358	middle
215	369	mtr-MIR2671e-p3	TTAAGGGACCAAAACGAAACC	21	chr4.1	-	48134047	48134432	ttcgttttggtcccttaactattaaaagtttcgtttcggtcccttaacttatttttgagttttcttttggtccttaactattaaaagtttcgttttggtcccttaacttattTTTTGGTTTCGTTTTGGTCCCttaacttattttttggtttcattttggtcccttaactctaatacattcatcctaacataaaggaccaaagtggttgacggaggaagagTTAAGGGACCAAAACGAAACCaaaaaataagttaagggaccaaaacgaaacttttaatagttaagggaccaaaacgaaaccaaaaagtaagttaagagaccaaaaagaaacttttaatagttaagggaccaaaacgaaaccaaaaaataagttaagggatcaaaa	7	mtr-MIR2671e,mtr-MIR2671g,mtr-MIR2671f,mtr-MIR2671i,mtr-MIR2671c,mtr-MIR2671b,mtr-MIR2671a,	mtr-MIR2671e	ttggtcccttaactaTTAAAAGTTTCGTTTCGGTCCcataacttatttttgggttttcttttggtcccttaactattaaaagtttcattttggtcccttgacttattttttggtttcgttttggtctcttaacttatttttttgtttcattttggtcccttaactctaatacattcatcctaacataaaggatcaaagaggttgacggaggatgagttaagggaccaaaacgaaaccaaaaagtaagttaacggaccaaaacgaagcttttaatagttaagggaccaaaacgaaaccaaaaagtaagttaagggaccaaaacgaaacttttaatagttaagggaccaaaacgaaactaaaaaataagttaagggaccaaaa	mtr-MIR2671e-p3	ttaagggaccaaaacgaaacc	3'	New	gp1	((((((((((((((((((((((((((((((((.(((.((((.((((((((((((((..((((..(((((((((((((((((((((((((((((((((((((((((((((((((((((((((((((((((((((((((((..(..(..(...((((((((((((.(((.......................))).))))))))))))....)..)..)..)))))))))))))))))))))))))))))))))))))))))))))))))))))))))))))))))))).)))))))..))))..)))))))))))))).)))).))).))))))))))))))))))))))))))))))))...........................	359	32.6	-218.3	1.7	420.667	548.833	426.167	456.667	354	396.667	493.34	515.172	486.42	464.398	360.762	384.089	middle
216	370	mtr-MIR2673b-p3_1ss13TC	GAACGAGGAGTACTGTGATTGGTC	24	chr4.1	-	54847977	54848248	ttgcttttcctcttcctcgtgctcttcctgttccacatcctcgtcaagaatttcagcatcatcattagtttccatagtgacttcattttgcacttgtgaagctgagttggtccagatttcattaacgaagtcatcgtcattaaaccctgctaccagactttctatggtattagtttgtaaatttggccattgaggtgtgtagcttgtttggggatagtttacaatgtgtggaagtgttggtaggttGAACGAGGAGTATTGTGATTGGTCtg	1	mtr-MIR2673b,	mtr-MIR2673b	ggtgttgctcttccgcttCCTCTTCCTCTTCCTCTTCCACatcctcgtcaagaatttcagcatcatcgttagtttcgatagcgacttcattttgcatttgtgaagctgaattggtccagatttcattaacgaagtcatcgtcattaaaccctgctgccagattttctatgggatttgtttgtgaatttggccattgaggtgcatagcttgtttggggatagttgacaaagtgtggaggggttggtaggttgaacgaggagtattgtgattggtctg	mtr-MIR2673b-p3	gaacgaggagtattgtgattggtc	3'	New	gp1	..(((..((...((((((((...(((((..(((((((((((((.((((.......(((((.((.((((((((((.((((...........)))))).))))))))..(((.((((((((((...((((.....)))).........((..(((((.........)))))..))..)).)))))))))))..)))))))....))))..))))))............))))))).....)).)))....))))))))......))..)))...	267	41.2	-69.2	0.6	0	5	0	0	0	0	0	4.69334	0	0	0	0	low
217	371	mtr-MIR2674-p5_1ss20AG	TCGGGACAAAAGGTTGCTAGC	21	chr6.1	-	70292432	70292725	aattagaagctttggctggaaaacacgaatggtttaatcgctcaagtcgaatcatcatcacaacTCGGGACAAAAGGTTGCTAACatgtcatgggattgaatgtacatatgaggtgaaggggttgaatgacatagatgctgctgagttggttagaaggaaagcttttaaagatgaatttagtccaagctacaacaatgtttcaacagaaaaaatgcatgttttagaacgtgttgtaacatatgcctctggtcatccacttgctttggaagtcatgggttctcacttttctaata	1	mtr-MIR2674,	mtr-MIR2674	aattagaagctctggctggaaaacacgaatggtttaatcgctcaagtcgaatcatcatcacaactcgggacaaaaggttgctaacatgtcatgggattgaatgtaaatatgaggtgaaggggttgaatgacatagatgctgctgagttggttagaaggaaagcttttaaagatgaatttagtccaagctacaaaaatgtttcaacagaaaaaatgcatgttttagaacgtgttgtaacatatgcctctggtcatcCACTCGCTTTGGAAGTCATGGgttctcacttttctaata	mtr-MIR2674-p5	tcgggacaaaaggttgctaac	5'	New	gp1	.(((((((((((.((((..(.....(((..(((......)))....)))..(((((....((((((((.((.....)).((....(((((((..(((......(((.......))).....)))..)))))))....))..)))))))).(((((((.....))))))).))))).)..)))).))))(((((((.(((((.((((...........))))...))))))))))))......(((..(((...((((.......))))..)))..)))........))))))).	60	38.4	-60.5	0.5	25	74	104	63	51	9	29.3189	69.4614	118.704	64.0666	51.9742	8.71463	middle
218	372	mtr-MIR2675-p3_1ss10GA	CAAAACGAGACATATTTGCAGGGA	24	chr1.1	-	39977098	39977257	ttttggtccctgcaaaatattttgttttttaaaaaggtccctgcaaaattttttgtttttgaaaataaaaaattttgcagggatcaaaaacaaatttatttttactagggactaaaacCAAAACGAGGCATATTTGCAGGGActaaaaccatattttagc	1	mtr-MIR2675,	mtr-MIR2675	actttcatgaatatggttttggtccctacaaaatattttgttttttaaaaaggtccctgcaaaaatttttgtttttgaaaataaaattttgcaaggaccaaaaacaaatttttttttacaaggactaaaaccaaaaCGAGGCATATTTGCAGGGATTaaaaccatattttagc	mtr-MIR2675-p3	caaaaCGAGGCATATTTGCAGGGA	3'	New	gp1	((((((((((((((((((..(((((((........(((((((((((((((((((((((....)))))))))))))))))))))))......................((........)).)))))))..)).))))))))))))))))............	148	28.8	-60	1.3	60	222	226	145	122	165	70.3654	208.384	257.953	147.455	124.33	159.768	middle
219	373	mtr-MIR2678-p5	CAGAAGGATCAACATCATAGA	21	chr6.2	-	82815299	82815726	tcacgtagatcccaaccagagatactcgccacttgttttagagcttccctccatcttgacaccatctgagagtcttgttggaatctttgttcatgtttggcaaaggcttcacaataaatcccactttgctttcgaacctCAGAAGGATCAACATCATAAAaaaccgggaaaacatgtttttcggatccctcaacgcattcacaaatcttttctaattcttgtaggcaccaagttgaggaagcatagttttttgagaagacgacaacaaaaacctgagatcctttgaTTGCTCGAAGAAGCTCAGGTCctatggattcacctttttgaagatttgtgtcatcacgaaatacaaaaataccttttgattcaaaggcatcgaaaagaaaatcgatgaaattg…	1	mtr-MIR2678,	mtr-MIR2678	atcacgtagatcccaaccaaagatactcgccacttgttttagagcttctctccatcttgacaccatctgagagtcttgtcggaatctttgttcatgtttggcaaaagcttcagaataaatcccactttgctttcgaacctcagaaggatcaacatcatagaaaacaagaagaacatgtttttcagattcctcaatgcattcacaaatcttctctaattcttgcaagcaccatgtcgaggaagcataatttcttgagaagacggcaacaaaaacatgagatccttggattgctcgaagaagctcaggccctatggattcacctttttgaagatttgtatcatcccgaaatacaaaaataccttttgtttcaaaggcatcaaaaagaaaatcaaTGAAATT…	mtr-MIR2678-p5	cagaaggatcaacatcataga	5'	New	gp1	((((.((((.........(((((((((((.((.((..((((((.(((((..(.....)...((.((((((..((((((((((((((((((.((....))))))))).))).))))))................))..)))))).))...................)))))....(((.((((((((.(((((((((...((..(((........)))..))...)).....)))))))..(((((..((((..(((((..((...((...(((((((...((((((....))))))...)))))))....))...))..)))))..))))..))))).))).))))).)))........))))))..))....((((((........)))))).....)…	85	40.4	-104.3	0.6	62	90	72	21	18	29	72.7109	84.48	82.1797	21.3555	18.3438	28.0805	middle
219	374	mtr-MIR2678-p3_1ss20CT	TTGCTCGAAGAAGCTCAGGTC	21	chr6.2	-	82815299	82815726	tcacgtagatcccaaccagagatactcgccacttgttttagagcttccctccatcttgacaccatctgagagtcttgttggaatctttgttcatgtttggcaaaggcttcacaataaatcccactttgctttcgaacctCAGAAGGATCAACATCATAAAaaaccgggaaaacatgtttttcggatccctcaacgcattcacaaatcttttctaattcttgtaggcaccaagttgaggaagcatagttttttgagaagacgacaacaaaaacctgagatcctttgaTTGCTCGAAGAAGCTCAGGTCctatggattcacctttttgaagatttgtgtcatcacgaaatacaaaaataccttttgattcaaaggcatcgaaaagaaaatcgatgaaattg…	1	mtr-MIR2678,	mtr-MIR2678	atcacgtagatcccaaccaaagatactcgccacttgttttagagcttctctccatcttgacaccatctgagagtcttgtcggaatctttgttcatgtttggcaaaagcttcagaataaatcccactttgctttcgaacctcagaaggatcaacatcatagaaaacaagaagaacatgtttttcagattcctcaatgcattcacaaatcttctctaattcttgcaagcaccatgtcgaggaagcataatttcttgagaagacggcaacaaaaacatgagatccttggattgctcgaagaagctcaggccctatggattcacctttttgaagatttgtatcatcccgaaatacaaaaataccttttgtttcaaaggcatcaaaaagaaaatcaaTGAAATT…	mtr-MIR2678-p3	ttgctcgaagaagctcaggcc	3'	New	gp1	((((.((((.........(((((((((((.((.((..((((((.(((((..(.....)...((.((((((..((((((((((((((((((.((....))))))))).))).))))))................))..)))))).))...................)))))....(((.((((((((.(((((((((...((..(((........)))..))...)).....)))))))..(((((..((((..(((((..((...((...(((((((...((((((....))))))...)))))))....))...))..)))))..))))..))))).))).))))).)))........))))))..))....((((((........)))))).....)…	85	40.4	-104.3	0.6	344	427	315	152	124	159	403.428	400.811	359.536	154.573	126.369	153.959	middle
220	375	mtr-MIR2680a-p5_2ss22AG24TC	ATCTTCATAGGACCATGCAAAGAC	24	chr6.2	+	52264676	52264840	gggtctagacccggcatATCTTCATAAGACCATGCAAAGACatctggataatcatggaggagttgaatgatcttctttttcacttctggctcaagtgtagcaccgatcttgatctctcgcttgttttcttcggtacccaggttgataagctcaatctcttcctgg	1	mtr-MIR2680a,	mtr-MIR2680a	atagggtctagacctggcatatcttcataggaccatgcaaaaatatccggatattcccggaggagttggatgatcttctgtttaaccccttcctctagagtagcaccaatcttgatttctcgcttgtttTCCTCGGTACCTATGTTGATaagctcaatctcttcctgg	mtr-MIR2680a-p5	atcttcataggaccatgcaaaaat	5'	New	gp1	..(((((((....((((.((((...))))..)))).......)))))))..(((.(((((((((((..((((........(((((.......))))).......))))..........(((((((..(((.((...)))))..))))))))))).))))))))))	47	44.8	-39.5	0.5	0	4.25	1.5	3	0	3	0	3.98934	1.71208	3.05079	0	2.90488	low
221	376	mtr-MIR2680c-p5_2ss22AG24TC	ATCTTCATAGGACCATGCAAAGAC	24	chr5.4	-	34386005	34386171	taggatctagacccggcatATCTTCATAGGACCATGCAAAGACatctggataatcatggagaagctggatgatcttctttttcacctctggctcaagtgcagcaccaatcttgatctctcgtttgttctcttcagtacccaggttgataagctcaatctcttcctgg	1	mtr-MIR2680c,	mtr-MIR2680c	atagggtctagacctggcatatcttcataggaccatgcaaaaatatccggatattcccggaggagctggatgatcttctgtttaaccccttcctctagagtagcaccaatcttgatttctcgcttgtttTCCTCGGTACCTATGTTGATaagctcaatctcttcctgg	mtr-MIR2680c-p5	atcttcataggaccatgcaaaaat	5'	New	gp1	(((((...(((...(((.((((..(((......))).......((((((.((.....((((((((..(((((.........)))..))..))(((((............)))))...........))))))....)).)))))).)))).)))...)))..))))).	166	44.9	-32.6	0.4	0	4.25	1.5	3	0	3	0	3.98934	1.71208	3.05079	0	2.90488	low
222	377	mtr-MIR2680b-p5_2ss22AG24TC	ATCTTCATAGGACCATGCAAAGAC	24	chr2.3	+	21575945	21576107	taggatctagacccggcatATCTTCATAGGACCATGCAAAGACatctggataatcatggagaagttgaatgatcttctttttcacctctggctcaagtgcagcaccgatcttaatctctcgcttgttctcttcggtacccaggttgataagctcaatctcttc	1	mtr-MIR2680b,	mtr-MIR2680b	atagggtctagacctggcatatcttcataggaccatgcaaaaatatctggatattcccggaggagttggatgatcttctgtttaaccccttcctctagagtggcaccaatcttgatttctcgcttgtttTCCTCGGTACCTATGTTGATaagctcgatctcttcttgg	mtr-MIR2680b-p5	atcttcataggaccatgcaaaaat	5'	New	gp1	(((((((.(((.((((.((.(((((((......)))..)))).)))))).......((((((((..((....))..))))))))..))).((......))......))))))).......(((((((..(((.((...)))))..)))))))...........	37	44.2	-30.8	0.4	0	4.25	1.5	3	0	3	0	3.98934	1.71208	3.05079	0	2.90488	low
223	378	mtr-MIR2680d-p5_2ss22AG24TC	ATCTTCATAGGACCATGCAAAGAC	24	chr2.3	+	24947658	24947824	taggatctagacccggcatATCTTCATAGGACCATGCAAAGACatctggataatcatggagaatctgagtgatcttctttttcacttctggctcaagtgcagcaccgatcttgatctctcgctggttttcttcagtacccatgttgataagctcaatctcttcttgg	2	mtr-MIR2680d,mtr-MIR2680e,	mtr-MIR2680d	atagggtctagacctggcatatcttcataggaccatgcaaaaatatccggatattcccggaggagttggatgatcttctgtttaaccccttcctctagagtagcaccaatcttgatttctcgcttgtttTCCTCGGTACCTATGTTGATaagctcaatctcttcttgg	mtr-MIR2680d-p5	atcttcataggaccatgcaaaaat	5'	New	gp1	(((((...(((...(((.((((..(((.((.........(((.(((..(((.......(((.....((((((.........))))))....)))..(((...)))..)))..))).))).(((((......))))).)).)))..)))).)))...)))..))))).	166	43.7	-33.7	0.5	0	4.25	1.5	3	0	3	0	3.98934	1.71208	3.05079	0	2.90488	low
224	379	peu-miR2916_R-1_2ss6AG21TG	TGGGGGCTCGAAGACGATCAGA	22	chr2.1	+	28646484	28646573	TGGGGGCTCGAAGACGATCAGAtaccgtcctagtcTCAACCATAAACGATGCCGACCagggatcagcggatgttgcttttaggactccgc	1	peu-MIR2916,	peu-MIR2916	TGGGGACTCGAAGACGATCATATaccatcctagtctcaaccataaacgatgccgaccagggattggcggatgttgcttctaggagtccgcca	peu-miR2916	TGGGGACTCGAAGACGATCATAT	5'	Diff	gp1	..((((((....((((.........))))..))))))..........(((.((.....)).))).(((((.(((........))))))))	35	54.4	-23.9	0.5	406	654	611	712	993	699	476.139	613.888	697.386	724.055	1011.97	676.837	high
224	380	peu-MIR2916-p3	TCAACCATAAACGATGCCGACC	22	chr2.1	+	28646484	28646573	TGGGGGCTCGAAGACGATCAGAtaccgtcctagtcTCAACCATAAACGATGCCGACCagggatcagcggatgttgcttttaggactccgc	1	peu-MIR2916,	peu-MIR2916	TGGGGACTCGAAGACGATCATATaccatcctagtctcaaccataaacgatgccgaccagggattggcggatgttgcttctaggagtccgcca	peu-MIR2916-p3	tcaaccataaacgatgccgacc	3'	New	gp1	..((((((....((((.........))))..))))))..........(((.((.....)).))).(((((.(((........))))))))	35	54.4	-23.9	0.5	382	678	649	947	1179	613	447.993	636.416	740.758	963.033	1201.52	593.563	high
225	381	mtr-miR4414a-5p	AGCTGCTGACTCGTTGGTTCA	21	chr1.1	-	77461058	77461161	ggctgagactcAGCTGCTGACTCGTTGGTTCAatagctcacaacatgtatagtgtcaacgtgtgtgcttctgatccaacgatgcgggagctgcattccagtcgt	1	mtr-MIR4414a,	mtr-MIR4414a	ggctgagactcAGCTGCTGACTCGTTGGTTCAatagctcacaacatgcatagtgtcaacgtgtgtgcttctgATCCAACGATGCGGGAGCTGCattccagtcgt	mtr-miR4414a-5p	AGCTGCTGACTCGTTGGTTCA	5'	Yes	gp1	(((((..(..(((((.(((..(((((((.(((..(((.((((((((.....)))).....)))).)))..))).)))))))..))).)))))..)..)))))..	102	51	-45.1	0.9	0	5	0	0	0	0	0	4.69334	0	0	0	0	low
226	382	mtr-MIR5204-p5	TCCCTCAAAGGCTTCCAGTATT	22	chr7.1	-	22607958	22608043	aacttttcatgtTCCCTCAAAGGCTTCCAGTATTcggtcatctaattacttgaatGCTGGAAGGTTTTGTAGGAACttgatagctt	1	mtr-MIR5204,	mtr-MIR5204	aacttttcatgttccctcaaaggcttccagtattcggtcatataattacttgaatGCTGGAAGGTTTTGTAGGAACttgatagctt	mtr-MIR5204-p5	tccctcaaaggcttccagtatt	5'	New	gp1	..((..(((.(((((..((((..(((((((((((((((.........)).)))))))))))))..))))..))))).))).))...	81	38.4	-31.8	1	14	0	5	0	0	6	16.4186	0	5.70692	0	0	5.80976	middle
226	383	mtr-miR5204	GCTGGAAGGTTTTGTAGGAAC	21	chr7.1	-	22607958	22608043	aacttttcatgtTCCCTCAAAGGCTTCCAGTATTcggtcatctaattacttgaatGCTGGAAGGTTTTGTAGGAACttgatagctt	1	mtr-MIR5204,	mtr-MIR5204	aacttttcatgttccctcaaaggcttccagtattcggtcatataattacttgaatGCTGGAAGGTTTTGTAGGAACttgatagctt	mtr-miR5204	GCTGGAAGGTTTTGTAGGAAC	3'	Yes	gp1	..((..(((.(((((..((((..(((((((((((((((.........)).)))))))))))))..))))..))))).))).))...	81	38.4	-31.8	1	10	0	0	5	0	0	11.7276	0	0	5.08465	0	0	middle
227	384	mtr-MIR5208d-p5	AGTCATATTAGTCATATTTGTAGG	24	chr1.1	+	29273238	29273320	gaatatAGTCATATTAGTCATATTTGTAGGcataagtactttgccGTTTTATGCTATTAACATGGATGTtgtgagtttgttca	1	mtr-MIR5208d,	mtr-MIR5208d	gaatatagtCATATTAGTCATATTTGTAGGCATaagtattttgccgttttatgctattaacatggatgatgtgagtttgttca	mtr-MIR5208d-p5	agtCATATTAGTCATATTTGTAGG	5'	New	gp1	(((((...(((((...(((....(((..((((((((.((......))))))))))..)))....)))..)))))...))))).	82	31.3	-18	0.7	11	8	8	10	7	12	12.9003	7.50934	9.13107	10.1693	7.13371	11.6195	middle
227	385	mtr-MIR5208d-p3_1ss24AT	GTTTTATGCTATTAACATGGATGT	24	chr1.1	+	29273238	29273320	gaatatAGTCATATTAGTCATATTTGTAGGcataagtactttgccGTTTTATGCTATTAACATGGATGTtgtgagtttgttca	1	mtr-MIR5208d,	mtr-MIR5208d	gaatatagtCATATTAGTCATATTTGTAGGCATaagtattttgccgttttatgctattaacatggatgatgtgagtttgttca	mtr-MIR5208d-p3	gttttatgctattaacatggatga	3'	New	gp1	(((((...(((((...(((....(((..((((((((.((......))))))))))..)))....)))..)))))...))))).	82	31.3	-18	0.7	0	0	0	0	0	0	0	0	0	0	0	0	low
228	386	mtr-miR5208a_L-2R+3	CATGGATGTTGTGAGTTTGTTCAC	24	chr1.4	-	17708500	17708568	ttatgctattaaCATGGATGTTGTGAGTTTGTTCACaaattcatcctttttgtttttagcgaatttgta	1	mtr-MIR5208c,	mtr-MIR5208c	ttatgatattAACATGGATGTTGTGAGTTTGTTcacaaattcatactttttgtttttagcgaatttgta	mtr-miR5208a	AACATGGATGTTGTGAGTTTGTT	5'	Diff	gp1	...(((((..((((.((((((((((((....)))))))...)))))....))))..)))))........	58	29	-19.2	1	3	10	0	5.5	0	0	3.51827	9.38667	0	5.59312	0	0	middle
229	387	mtr-miR5208a_L-2R+3	CATGGATGTTGTGAGTTTGTTCAC	24	chr2.4	-	13214973	13215060	ttgaatatagtcatattagtcatatttgtaggcataggtactttgccgttttatgctattaaCATGGATGTTGTGAGTTTGTTCACag	1	mtr-MIR5208a,	mtr-MIR5208a	ttgaatacggtcatattagccatattagtaggcataggtactttgccgttttaggctattAACATGGATGTTGTGAGTTTGTTcacag	mtr-miR5208a	AACATGGATGTTGTGAGTTTGTT	3'	Diff	gp1	.((((((...(((((...(((....(((..(((((((((.....)))....))))))..)))....)))..)))))...))))))...	84	33	-18	0.6	3	10	0	5.5	0	0	3.51827	9.38667	0	5.59312	0	0	middle
230	388	mtr-miR5211_L+2R-3	TGTCGCAGGAGTGATGGGACC	21	chr6.3	-	5381139	5381251	agggaatccTGTCGCAGGAGTGATGGGACCggcctatggtatatatatgaatatttatgatatgaatattatcatatagTGGTGCCATCCTCTTGCGACAggattcccttcaa	1	mtr-MIR5211,	mtr-MIR5211	tcagggaatcctgTCGCAGGAGTGATGGGACCGGCctatggtacatatatgaatatttatgatatgaatattatcatatagtggtgccatcctcctgcgacatgattcccttcaa	mtr-miR5211	TCGCAGGAGTGATGGGACCGGC	5'	Diff	gp1	((((((((((((((((((((.(((((.(((.(((...)))...(((((((((((((((...))))))))..)))))))..))).)))))))))))))))))))))))))....	109	41.6	-62	1.3	6158	5105	7100	8343	8457	2692	7221.83	4791.9	8103.83	8484.25	8618.55	2606.64	high
230	389	mtr-MIR5211-p3_1ss14CT	TGGTGCCATCCTCTTGCGACA	21	chr6.3	-	5381139	5381251	agggaatccTGTCGCAGGAGTGATGGGACCggcctatggtatatatatgaatatttatgatatgaatattatcatatagTGGTGCCATCCTCTTGCGACAggattcccttcaa	1	mtr-MIR5211,	mtr-MIR5211	tcagggaatcctgTCGCAGGAGTGATGGGACCGGCctatggtacatatatgaatatttatgatatgaatattatcatatagtggtgccatcctcctgcgacatgattcccttcaa	mtr-MIR5211-p3	tggtgccatcctcctgcgaca	3'	New	gp1	((((((((((((((((((((.(((((.(((.(((...)))...(((((((((((((((...))))))))..)))))))..))).)))))))))))))))))))))))))....	109	41.6	-62	1.3	89	100	145	97	202	30	104.375	93.8667	165.501	98.6423	205.859	29.0488	middle
231	390	mtr-miR5212-5p_1ss9GT	TGGATTTCTTATTTCTTTGGTA	22	chr2.1	+	58882652	58882732	tggtagcagtTGGATTTCTTATCTCTTTGGTAggatgttgggcaaacaatactactaaggaaatagatatccagccgctac	1	mtr-MIR5212,	mtr-MIR5212	tggtagcagtTGGATTTCGTATTTCTTTGGTAggatgttgggccaacaatactaCCAAGGAAATAGATATCCAGCcgctactgtc	mtr-miR5212-5p	TGGATTTCGTATTTCTTTGGTA	5'	Diff	gp1	..(((((.(((((((.((.(((.((((((((((..(((((......))))))))))))))).))))).))))))).)))))	79	40.7	-34.3	1	43	33	17	14	27	20	50.4285	30.976	19.4035	14.237	27.5158	19.3659	middle
232	391	mtr-miR5213-5p	TACGTGTGTCTTCACCTCTGAA	22	chr2.1	-	35912529	35912644	tagtgaaattgaTACGTGTGTCTTCACCTCTGAActatcaatattattatgtctcaaatctttgatttgattcattcttttgcttCAGAGTGTAGATACACGCATCtcttttccta	1	mtr-MIR5213,	mtr-MIR5213	tagtgaaattgaTACGTGTGTCTTCACCTCTGAActatcaatattatgtttcaaatctttgattcgattcattcttttgcttCAGAGTGCAGATACACGCATCtcttttccta	mtr-miR5213-5p	TACGTGTGTCTTCACCTCTGAA	5'	Yes	gp1	(((.((((..(((.(((((((((.(((.((((((....(((.......(((..(((((((...)))))))..)))....))).))))))))).))))))))).)))...)))))))	116	32.8	-36	0.9	730	1280	836	1956	616	1563	856.112	1201.49	954.197	1989.12	627.767	1513.44	high
232	392	mtr-miR5213-3p_1ss8CT	CAGAGTGTAGATACACGCATC	21	chr2.1	-	35912529	35912644	tagtgaaattgaTACGTGTGTCTTCACCTCTGAActatcaatattattatgtctcaaatctttgatttgattcattcttttgcttCAGAGTGTAGATACACGCATCtcttttccta	1	mtr-MIR5213,	mtr-MIR5213	tagtgaaattgaTACGTGTGTCTTCACCTCTGAActatcaatattatgtttcaaatctttgattcgattcattcttttgcttCAGAGTGCAGATACACGCATCtcttttccta	mtr-miR5213-3p	CAGAGTGCAGATACACGCATC	3'	Diff	gp1	(((.((((..(((.(((((((((.(((.((((((....(((.......(((..(((((((...)))))))..)))....))).))))))))).))))))))).)))...)))))))	116	32.8	-36	0.9	1317	1502	1401	1234	1015	1318	1544.52	1409.88	1599.08	1254.89	1034.39	1276.21	high
233	393	mtr-MIR5214-p5	CCGTAGTCTAGCTCTATTAAC	21	chr3.1	-	3755110	3755204	gtctctctCCGTAGTCTAGCTCTATTAACagttaaatccaccgttgaaggcagatttaattgtTGATAGAGCTAGACCATCGGAGcgagaccctt	1	mtr-MIR5214,	mtr-MIR5214	tcccgtctttctccgtagtcTAGCTCTATTAACAATTAAATtcaccgttgaaggtagatttaattgtTGATAGAGCTAGACCATCGGAGcgagaccctt	mtr-MIR5214-p5	ccgtagtcTAGCTCTATTAAC	5'	New	gp1	(((((.(((((..(((((((((((((((((((((((((..((......))..)))))))))))))))))))))))))...))))).)))))....	91	44.2	-57.1	1.4	1532	1924	1033	1410	852	1476	1796.66	1806	1179.05	1433.87	868.275	1429.2	high
233	394	mtr-miR5214-3p	TGATAGAGCTAGACCATCGGAG	22	chr3.1	-	3755110	3755204	gtctctctCCGTAGTCTAGCTCTATTAACagttaaatccaccgttgaaggcagatttaattgtTGATAGAGCTAGACCATCGGAGcgagaccctt	1	mtr-MIR5214,	mtr-MIR5214	tcccgtctttctccgtagtcTAGCTCTATTAACAATTAAATtcaccgttgaaggtagatttaattgtTGATAGAGCTAGACCATCGGAGcgagaccctt	mtr-miR5214-3p	TGATAGAGCTAGACCATCGGAG	3'	Yes	gp1	(((((.(((((..(((((((((((((((((((((((((..((......))..)))))))))))))))))))))))))...))))).)))))....	91	44.2	-57.1	1.4	1876	2662	1375	1540	1078	1353	2200.09	2498.73	1569.4	1566.07	1098.59	1310.1	high
234	395	mtr-miR5228_L-1R+1	CTGGTGTACAACTTGATGGAG	21	chr4.1	+	81270917	81271070	tgcaactttCTGGTGTACAACTTGATGGAGattttaaatatctttcaagaaatttgagatggctgcactggaatggatttccgttaacatgcttaccttcaaacttctatcaaagaaatatagtctccattgagttagaaaatagcaatgtcaa	1	mtr-MIR5228,	mtr-MIR5228	tgcaacttTCTGGTGTACAACTTGATGGAgattttaaatatctttcaagaaatttgagatggctacactggaatggatttccgttagcatgcataccttcaaacttctatcaaagaaatatagtttccattgagttagaaaacagcagtgtcaa	mtr-miR5228	TCTGGTGTACAACTTGATGGA	5'	Diff	gp1	(((...((((((.......(((..(((((((((....((.(((((..((((.((((((..((..(((....(((((....)))))....)))...)))))))).))))...))))).))..)))))))))..)))))))))...))).......	147	33.8	-41.1	0.8	0	7	0	10	9	0	0	6.57067	0	10.1693	9.17192	0	middle
235	396	mtr-MIR5230-p5_2ss9GA20CG	TTGGCAAGAAGATTGTAGAGA	21	chr3.1	-	26761891	26762032	tttgaatatccaaatcttgaatcgaTTGGCAAGGAGATTGTAGACAagtgtggagggttgcctttagctgtgaAAACATTGGGGAATCTCTTGCaaagaaaattttcccaaggtgaatggatgaaaatattggagactgata	1	mtr-MIR5230,	mtr-MIR5230	tttgactatcCAAATCTTGAATCGATTGGCAaggagattgtagacaaatgtggagggttgcctttagccgtgaaaacattggggaatctcttgcaaagaaaattttctcagggtgaatggtttaagatattggaaactgatatg	mtr-MIR5230-p5	TTGGCAaggagattgtagaca	5'	New	gp1	........(((((...((..(((.(((..(..(((((...........((..(..((((.(((.....(((....)))..))).))))..)..))........)))))....)..))).)))..))...)))))........	126	38	-28.6	0.5	45	32	25	17	27	10	52.774	30.0373	28.5346	17.2878	27.5158	9.68293	middle
235	397	mtr-MIR5230-p3_1ss4CT	AAATATTGGGGAATCTCTTGC	21	chr3.1	-	26761891	26762032	tttgaatatccaaatcttgaatcgaTTGGCAAGGAGATTGTAGACAagtgtggagggttgcctttagctgtgaAAACATTGGGGAATCTCTTGCaaagaaaattttcccaaggtgaatggatgaaaatattggagactgata	1	mtr-MIR5230,	mtr-MIR5230	tttgactatcCAAATCTTGAATCGATTGGCAaggagattgtagacaaatgtggagggttgcctttagccgtgaaaacattggggaatctcttgcaaagaaaattttctcagggtgaatggtttaagatattggaaactgatatg	mtr-MIR5230-p3	aaacattggggaatctcttgc	3'	New	gp1	........(((((...((..(((.(((..(..(((((...........((..(..((((.(((.....(((....)))..))).))))..)..))........)))))....)..))).)))..))...)))))........	126	38	-28.6	0.5	78	120	86	65	100	61	91.475	112.64	98.159	66.1005	101.91	59.0658	middle
236	398	mtr-miR5231	TTATGCAAGTAGATAAGCTCA	21	chr7.1	-	87687462	87687566	ttagaggtgcTTATGCAAGTAGATAAGCTCAaataagccaaatcaaagaggagcttgtttggatttacttatttgagcttatgtattggcataagcactttgcaa	1	mtr-MIR5231,	mtr-MIR5231	ttagaggtgcTTATGCAAGTAGATAAGCTCAaataagccaaatcaaagaggagcttgtttggatttacttatttgagcttatgtattggcataagaactttgcaa	mtr-miR5231	TTATGCAAGTAGATAAGCTCA	5'	Yes	gp1	...(((((((((((((.((((.(((((((((((((((((((((..(((.....))))))))).....))))))))))))))).)))).)))))))))))))....	98	35.2	-47.5	1.3	169	199	148	183	254	70	198.196	186.795	168.925	186.098	258.852	67.7805	middle
237	399	mtr-MIR5234-p5_2ss12TC21CT	AAAAGATGTTTCGCCTATTGT	21	chr3.2	+	24144825	24144977	ataatattatgccttctttgcttctggcatatcaacatcttccttctcatttgAAAAGATGTTTTGCCTATTGCtcgatttttccaaagggctatccctttaataggaagaaattgaTTTTGTTGTGGATGGCAGAAGgcttcctcgaacatt	1	mtr-MIR5234,	mtr-MIR5234	ataatattatgccttctttgtttctgacatatcaacatcttccttcccatttgaaaagatgttttgcctattgctcgatttttccaaagggctatccctttaataggaagaaattgaTTTTGTTGTGGATGGCAGAAGgcttcctcgaacatt	mtr-MIR5234-p5	aaaagatgttttgcctattgc	5'	New	gp1	..........((((((..(((((((((((....((((((((..(((......))))))))))).))))......(((((((((((((((((....))))))....)).))))))))).........))).)))))))))).............	43	36.6	-40.5	0.7	6	0	0	5	14	5	7.03654	0	0	5.08465	14.2674	4.84146	middle
237	400	mtr-miR5234	TTTTGTTGTGGATGGCAGAAG	21	chr3.2	+	24144825	24144977	ataatattatgccttctttgcttctggcatatcaacatcttccttctcatttgAAAAGATGTTTTGCCTATTGCtcgatttttccaaagggctatccctttaataggaagaaattgaTTTTGTTGTGGATGGCAGAAGgcttcctcgaacatt	1	mtr-MIR5234,	mtr-MIR5234	ataatattatgccttctttgtttctgacatatcaacatcttccttcccatttgaaaagatgttttgcctattgctcgatttttccaaagggctatccctttaataggaagaaattgaTTTTGTTGTGGATGGCAGAAGgcttcctcgaacatt	mtr-miR5234	TTTTGTTGTGGATGGCAGAAG	3'	Yes	gp1	..........((((((..(((((((((((....((((((((..(((......))))))))))).))))......(((((((((((((((((....))))))....)).))))))))).........))).)))))))))).............	43	36.6	-40.5	0.7	98	95	88	85	175	53	114.93	89.1734	100.442	86.4391	178.343	51.3195	middle
238	401	mtr-MIR5237-p3	TGGAGAGATTAAAAAGATTGT	21	chr6.1	-	77412565	77412749	aatatttgaagctcaaactatttttttttggtttttgtacgtgatgatataatgttattgaacaactttctgaactttcaggccacaagcTGGAGAGATTAAAAAGATTGTtcaaaagataatgaatatattggattgtaaatcttcattcgtttcaaaagatttagttgggataaattctcgga	1	mtr-MIR5237,	mtr-MIR5237	aatatttgaagttcaaactatttttttttgtttttgtacgtgatgatataatgttattgaacaactttctgaactttcaggccacaagctggagagattaaaaagattgttcaaaatataatgaatatattggattgtaaatcttcattcatTTCAAAAGATTTAGTTGGGATaaattctcgga	mtr-MIR5237-p3	tggagagattaaaaagattgt	3'	New	gp1	....((((((((..((((((........))))))......((((.(((.........((((((((((((.(((.(((((..((.....))..))))).))).)))).))))))))...........((((......)))).))).))))..))))))))..........((((.....))))...	58	28.6	-36.4	0.7	7	14	17	0	0	0	8.2093	13.1413	19.4035	0	0	0	middle
239	402	mtr-miR5239	TGGGAGAAAAGATAGAATGTG	21	chr6.1	-	21723841	21723946	atgttttgttTGGGAGAAAAGATAGAATGTGgaattcgatagacatgatccgtagtttactggaccgtctactgagccaCGTTCTATATTTTCTCCCACCcaaaac	1	mtr-MIR5239,	mtr-MIR5239	atgtttcgttTGGGAGAAAAGATAGAATGTGgaattcgatagacatgatccgtagtttactggatcgtccactaagccacgttctatattttctccccaccccaaaacctg	mtr-miR5239	TGGGAGAAAAGATAGAATGTG	5'	Yes	gp1	..((((((..((((((((((.(((((((((((..(((..(((((....((((........))))..)))))..)))))))))))))).))))))))))..))))))	104	40.6	-46.4	1.1	100945	84140	56508	86500	93106	80334	118384	78979.5	64497.3	87964.5	94884.5	77786.8	high
239	403	mtr-MIR5239-p3_2ss19CA20AC	CGTTCTATATTTTCTCCCACC	21	chr6.1	-	21723841	21723946	atgttttgttTGGGAGAAAAGATAGAATGTGgaattcgatagacatgatccgtagtttactggaccgtctactgagccaCGTTCTATATTTTCTCCCACCcaaaac	1	mtr-MIR5239,	mtr-MIR5239	atgtttcgttTGGGAGAAAAGATAGAATGTGgaattcgatagacatgatccgtagtttactggatcgtccactaagccacgttctatattttctccccaccccaaaacctg	mtr-MIR5239-p3	cgttctatattttctccccac	3'	New	gp1	..((((((..((((((((((.(((((((((((..(((..(((((....((((........))))..)))))..)))))))))))))).))))))))))..))))))	104	40.6	-46.4	1.1	162	130	141	397	277	470	189.987	122.027	160.935	403.722	282.291	455.098	middle
240	404	mtr-miR5241a_L+2R-2	TGTGACTGAATGGAAGAGTGC	21	chr6.1	+	51759780	51759854	gcaattaaagtattgggctcatttttgtttggtcgtaaTGTGACTGAATGGAAGAGTGCattggctagattgaga	2	mtr-MIR5241a,mtr-MIR5241b,	mtr-MIR5241b	attaaagtattgggctcatttttgttcggtcgtaatgTGACTGAATGGAAGAGTGCATtggctaaat	mtr-miR5241a	TGACTGAATGGAAGAGTGCAT	3'	Diff	gp1	.(((((..(((..((..(((..(((..((..((((.....))))..))..))))))..))...))).)))))...	71	38.7	-19.7	0.7	5	6.5	5	3.5	3	0	5.86378	6.10134	5.70692	3.55926	3.05731	0	low
241	405	mtr-MIR5241c-p5	TTGGGCTCATTTTTGTTTGGT	21	chr6.3	-	77780589	77780705	ttatgctaatggtctaccactagcaattacagtaTTGGGCTCATTTTTGTTTGGTcgtaaTGTGACTGAATGGAAGAGTGCattggctagattgagagaaagtccagataatgatgt	1	mtr-MIR5241c,	mtr-MIR5241c	gttatgctaatggtcttccactagcaattaaagtattgggctcatttttgtttggtcgtaatgTGACTGAATGGAAGAGTGCATtggctagattgagagaaaggccagataacgatgt	mtr-MIR5241c-p5	ttgggctcatttttgtttggt	5'	New	gp1	...(((((.(((....))).)))))....((.(((((((((..(((..(((((((((..((((.(((.........))))))))))))))))..)))...))))))).)).))....	84	38.5	-29.6	0.7	5	0	5	5	0	0	5.86378	0	5.70692	5.08465	0	0	low
241	406	mtr-miR5241a_L+2R-2	TGTGACTGAATGGAAGAGTGC	21	chr6.3	-	77780589	77780705	ttatgctaatggtctaccactagcaattacagtaTTGGGCTCATTTTTGTTTGGTcgtaaTGTGACTGAATGGAAGAGTGCattggctagattgagagaaagtccagataatgatgt	1	mtr-MIR5241c,	mtr-MIR5241c	gttatgctaatggtcttccactagcaattaaagtattgggctcatttttgtttggtcgtaatgTGACTGAATGGAAGAGTGCATtggctagattgagagaaaggccagataacgatgt	mtr-miR5241a	TGACTGAATGGAAGAGTGCAT	3'	Diff	gp1	...(((((.(((....))).)))))....((.(((((((((..(((..(((((((((..((((.(((.........))))))))))))))))..)))...))))))).)).))....	84	38.5	-29.6	0.7	5	6.5	5	3.5	3	0	5.86378	6.10134	5.70692	3.55926	3.05731	0	low
242	407	mtr-miR5243	TGGGCAGAGAAATCGTGAGGC	21	chr2.2	-	47441979	47442126	aaatgctatacctacatggttttagtgctgaaaatggcattcaagtgctgactgacaaatccctcataaaaattgatggcaatggttgtgtgagaatgcatgacttagttcaagacaTGGGCAGAGAAATCGTGAGGCaggaatcaac	1	mtr-MIR5243,	mtr-MIR5243	aaatgctatacctacatggttttagtgctgaaaatggaattcaagtgctgaccgacaaatccctcataaaagttgatggcaatggttgtgtgagaatgcatgacttagttcaagacaTGGGCAGAGAAATCGTGAGGCaggaatcaac	mtr-miR5243	TGGGCAGAGAAATCGTGAGGC	3'	Yes	gp1	..........(((.(((((((((..((((......(((((....))))).((((......((.(((.......))).))....(((..(((......)))..)))))))..........))))..))))))))))))...........	127	40.5	-31.6	0.5	0	0	0	0	0	0	0	0	0	0	0	0	low
243	408	mtr-MIR5244-p5_2ss15TA18AT	CGCCAACAAAAAGTAGCTGAG	21	chr3.1	+	23748033	23748130	ataacaacgCGCCAACAAAAAGTTGCAGAGgtggcacacacatttcctattcatgaattagaacctctatctCATGAAGATTGTTGGTCTTTActctc	1	mtr-MIR5244,	mtr-MIR5244	ataacaacgcgccaacaaaaagttgcagaggtggcacacacatttcctattcaggaattagaacctcTATCTCATGAAGATTGTTGGTctttactctca	mtr-MIR5244-p5	cgccaacaaaaagttgcagag	5'	New	gp1	..........((((((((...((..(....)..))..............(((((((..(((.....)))..)))))))..))))))))..........	78	39.8	-23.4	0.6	14	6	0	0	0	5	16.4186	5.632	0	0	0	4.84146	middle
243	409	mtr-MIR5244-p3_1ss1CG	GATGAAGATTGTTGGTCTTTA	21	chr3.1	+	23748033	23748130	ataacaacgCGCCAACAAAAAGTTGCAGAGgtggcacacacatttcctattcatgaattagaacctctatctCATGAAGATTGTTGGTCTTTActctc	1	mtr-MIR5244,	mtr-MIR5244	ataacaacgcgccaacaaaaagttgcagaggtggcacacacatttcctattcaggaattagaacctcTATCTCATGAAGATTGTTGGTctttactctca	mtr-MIR5244-p3	CATGAAGATTGTTGGTcttta	3'	New	gp1	..........((((((((...((..(....)..))..............(((((((..(((.....)))..)))))))..))))))))..........	78	39.8	-23.4	0.6	32	14	30	18	31	15	37.5282	13.1413	34.2415	18.3048	31.5922	14.5244	middle
244	410	mtr-miR5248_L-2R+2	TTTAGTTGGCATGCATTCAAG	21	chr4.2	-	79803091	79803210	tctcttgagcttTTTAGTTGGCATGCATTCAAGaatccaagtcctatagaaagttacactgacctttgtagagatgttgttgagtactgtgggggaTTGCCGCTAGCTCTTAAAGTCctt	1	mtr-MIR5248,	mtr-MIR5248	tctcttaagcTTTTTAGTTGGCATGCATTCAgaactccaagtcctaaagaaagttacgctgacctttgtagagatgttgttgagtactgtggggggttgccggtagctcttgaaatcctt	mtr-miR5248	TTTTTAGTTGGCATGCATTCA	5'	Diff	gp1	........(((((..(((((((....((((((.(((....((((((((((..(((.....))).))))))).)))))).))))))...(..(....)..).)))))))...)))))....	108	41.7	-24.5	0.5	107	161	88	96	107	125	125.485	151.125	100.442	97.6254	109.044	121.037	middle
244	411	mtr-MIR5248-p3_2ss7GC19AG	TTGCCGCTAGCTCTTGAAGTC	21	chr4.2	-	79803091	79803210	tctcttgagcttTTTAGTTGGCATGCATTCAAGaatccaagtcctatagaaagttacactgacctttgtagagatgttgttgagtactgtgggggaTTGCCGCTAGCTCTTAAAGTCctt	1	mtr-MIR5248,	mtr-MIR5248	tctcttaagcTTTTTAGTTGGCATGCATTCAgaactccaagtcctaaagaaagttacgctgacctttgtagagatgttgttgagtactgtggggggttgccggtagctcttgaaatcctt	mtr-MIR5248-p3	ttgccggtagctcttgaaatc	3'	New	gp1	........(((((..(((((((....((((((.(((....((((((((((..(((.....))).))))))).)))))).))))))...(..(....)..).)))))))...)))))....	108	41.7	-24.5	0.5	6	0	13	0	0	0	7.03654	0	14.838	0	0	0	middle
245	412	mtr-MIR5255-p3	TTACATGACTTGATAGAGGACA	22	chr6.2	+	48853300	48853387	gtgttggctgacaaatctctcatagaccaaaattatggtcatgtgacaTTACATGACTTGATAGAGGACAtgggtaaagaagtcgtcc	1	mtr-MIR5255,	mtr-MIR5255	gtgttggttgacaaatgtctcatatatcaatcttatggtgatatgaccttacaTGACTTGATAGAGGACATGGGtaaagcaatcgtcc	mtr-MIR5255-p3	ttacaTGACTTGATAGAGGACA	3'	New	gp1	.....(((.(((...((((((((...((...((((.(((((((((....)))))))))))))...))..)))))...))).)))))).	82	40.9	-19.9	0.6	0	0	7	0	0	8	0	0	7.98969	0	0	7.74634	low
246	413	mtr-MIR5258-p5_2ss15TA18AG	TAACTCAAATGCAAAGCGGGC	21	chr4.1	-	1023760	1023862	gcgaaacatcttttcaaatgagaaggaagatattgaTAACTCAAATGCAAAGCAGGCaaaattgtatcattccgtaagtTCCATATGTCACTATTCAGAAttg	1	mtr-MIR5258,	mtr-MIR5258	gcgaaacatctttTCAAGTGACAAGGAAGATCTTgataactcaaatgcaatgcaggcatgactttatcatttgataagttccatatgtcactattcagaattgcattcca	mtr-MIR5258-p5	taactcaaatgcaatgcaggc	5'	New	gp1	(((.....(((((((....))))))).......(((((.......(((.......)))......)))))...))).(((((...(((....)))...))))).	13	34	-12.2	0.3	73	43	77	75	85	52	85.6112	40.3627	87.8866	76.2698	86.6237	50.3512	middle
246	414	mtr-MIR5258-p3_1ss11AG	TCCATATGTCGCTATTCAGAA	21	chr4.1	-	1023760	1023862	gcgaaacatcttttcaaatgagaaggaagatattgaTAACTCAAATGCAAAGCAGGCaaaattgtatcattccgtaagtTCCATATGTCACTATTCAGAAttg	1	mtr-MIR5258,	mtr-MIR5258	gcgaaacatctttTCAAGTGACAAGGAAGATCTTgataactcaaatgcaatgcaggcatgactttatcatttgataagttccatatgtcactattcagaattgcattcca	mtr-MIR5258-p3	tccatatgtcactattcagaa	3'	New	gp1	(((.....(((((((....))))))).......(((((.......(((.......)))......)))))...))).(((((...(((....)))...))))).	13	34	-12.2	0.3	21	26	29	11	15	15	24.6279	24.4053	33.1001	11.1862	15.2865	14.5244	middle
247	415	mtr-miR5261	TCATTGTAGATGGCTTTGGCT	21	chr8.1	-	84864355	84864420	caatgaaactagtacaatcaaatctacgatgaattTCATTGTAGATGGCTTTGGCTacagttgttt	1	mtr-MIR5261,	mtr-MIR5261	caatgaaactagtacaatcaaatctacgatgaattTCATTGTAGATGGCTTTGGCTacagttgttt	mtr-miR5261	TCATTGTAGATGGCTTTGGCT	3'	Yes	gp1	.((..(...((((.(((....((((((((((.....))))))))))....)))))))...)..)).	64	33.3	-17.4	0.8	133	107	166	115	57	76	155.977	100.437	189.47	116.947	58.0888	73.5902	middle
248	416	mtr-miR5263_L+2R+1_2ss3TG22GA	AAGGACTAAAACTAGTAACGGAGC	24	chr2.3	-	17618491	17618592	ccctatgttttgctccattactagttttagtcctttctgttaacgtttttttgagagaaactaacagaAAGGACTAAAACTAGTAACAGAGCaaaacataga	1	mtr-MIR5263,	mtr-MIR5263	ccctatgttttgctccattactagttttagtcctttctgttaacgtttttttggagagaaactaacaaaaaTGACTAAAACTAGTAACGGGGcaaaacatagat	mtr-miR5263	TGACTAAAACTAGTAACGGGG	3'	Diff	gp1	..(((((((((((((..(((((((((((((((((((((((((..(((((((...))))))))))))))))))))))))))))))))..))))))))))))).	99	33.3	-60	1.8	42	102	100	64	58	63	49.2558	95.744	114.138	65.0836	59.1079	61.0024	middle
249	417	mtr-MIR5266-p5	TGGCTGGGGGACTGTCTGG	19	chr6.2	+	22487607	22487680	gggcaTGGCTGGGGGACTGTCTGGggcgcgcccaggcacccccaggcaccaaataacaagctgctccccccaaa	1	mtr-MIR5266,	mtr-MIR5266	tggggcatggCTGGGGGACTGTCTGGGGCGcgcccaggcagcccccagccaccaaaaaacaagctgctccccccaaa	mtr-MIR5266-p5	tggCTGGGGGACTGTCTGG	5'	New	gp1	(((((((.(((((((..((((((((.....))))))))))))))).)).............)))))........	43	67.6	-34.7	0.7	0	0	0	0	0	15	0	0	0	0	0	14.5244	middle
250	418	mtr-MIR5267k-p5_1ss18TC	ATAGGCATTTGCTAGAACACACCC	24	chr1.1	+	51916333	51916419	agcaaatcctATAGGCATTTGCTAGAATACACCCacttATTTTTTAGAAGGAGTATTTTAGCaagtgattaactaaaaagtggttaa	10	mtr-MIR5267k,mtr-MIR5267c,mtr-MIR5267d,mtr-MIR5267e,mtr-MIR5267h,mtr-MIR5267a,mtr-MIR5267b,mtr-MIR5267j,mtr-MIR5267f,mtr-MIR5267g,	mtr-MIR5267k	agcaaatcctatAGGCATTTGCTAGAATACACCCACttattttttagaatgagtattttagcaaatgaataactaaaaagtggttaa	mtr-MIR5267k-p5	atAGGCATTTGCTAGAATACACCC	5'	New	gp1	...............(((((((((((((((.((..((........))..)).))))))))))))))).(((((((.....)))))))	52	31	-24.1	0.9	66.5	105	82	88.5	88	97	77.9883	98.5601	93.5935	89.9984	89.681	93.9244	middle
250	419	mtr-MIR5267c-p3_2ss14AT17AG	ATTTTTTAGAAGGTGTGTTTTAGC	24	chr1.1	+	51916333	51916419	agcaaatcctATAGGCATTTGCTAGAATACACCCacttATTTTTTAGAAGGAGTATTTTAGCaagtgattaactaaaaagtggttaa	10	mtr-MIR5267k,mtr-MIR5267c,mtr-MIR5267d,mtr-MIR5267e,mtr-MIR5267h,mtr-MIR5267a,mtr-MIR5267b,mtr-MIR5267j,mtr-MIR5267f,mtr-MIR5267g,	mtr-MIR5267c	gcaaatcctatAGGCATTTGCTAGAATACACCCACttattttttagaaggagtattttagcaagtgaataactaaaaagtg	mtr-MIR5267c-p3	attttttagaaggagtattttagc	3'	New	gp1	...............(((((((((((((((.((..((........))..)).))))))))))))))).(((((((.....)))))))	52	31	-24.1	0.9	11	13	10	5	7	7	12.9003	12.2027	11.4138	5.08465	7.13371	6.77805	middle
251	420	mtr-MIR5267o-p5	TATAGGCATTTGCTAGGATACACC	24	chr7.3	-	84097594	84097676	agcaaatccTATAGGCATTTGCTAGGATACACCcacttattttttagaaggagtattttAGCAAGTGAATAACTAAAAAGTGG	2	mtr-MIR5267o,mtr-MIR5267l,	mtr-MIR5267o	agcaaatcctatAGGCATTTGCTAGGATACACCCACttagtttttagaaggagtattttagcaagtgaataactaaaaagtgg	mtr-MIR5267o-p5	tatAGGCATTTGCTAGGATACACC	5'	New	gp1	...........((..(((((((((..((((.((..((........))..)).))))..)))))))))..))............	60	33.7	-21	0.8	76	152	120	109	131	135	89.1295	142.677	136.966	110.845	133.502	130.72	middle
251	421	mtr-MIR5267o-p3_1ss8GA	AGCAAGTAAATAACTAAAAAGTGG	24	chr7.3	-	84097594	84097676	agcaaatccTATAGGCATTTGCTAGGATACACCcacttattttttagaaggagtattttAGCAAGTGAATAACTAAAAAGTGG	2	mtr-MIR5267o,mtr-MIR5267l,	mtr-MIR5267o	agcaaatcctatAGGCATTTGCTAGGATACACCCACttagtttttagaaggagtattttagcaagtgaataactaaaaagtgg	mtr-MIR5267o-p3	agcaagtgaataactaaaaagtgg	3'	New	gp1	...........((..(((((((((..((((.((..((........))..)).))))..)))))))))..))............	60	33.7	-21	0.8	0	0	0	0	0	0	0	0	0	0	0	0	low
252	422	mtr-MIR5267i-p5_1ss18TC	ATAGGCATTTGCTAGAACACACCC	24	chr1.2	-	81964434	81964517	caaatcctATAGGCATTTGCTAGAATACACCCacttattttttagaaggagtattttagcaagtgaataattaaaaagtggtta	1	mtr-MIR5267i,	mtr-MIR5267i	caaatcctatAGGCATTTGCTAGAATACACCCACttattttttagaatgagtattttagcaagtgaataattaaaaagtggtta	mtr-MIR5267i-p5	atAGGCATTTGCTAGAATACACCC	5'	New	gp1	.........((..(((((((((((((((.((..((........))..)).)))))))))))))))..))...............	60	29.8	-22.3	0.9	66.5	105	82	88.5	88	97	77.9883	98.5601	93.5935	89.9984	89.681	93.9244	middle
253	423	mtr-MIR5269b-p5_1ss21AG	ATTGGGTGAAATCAATGTAGGACC	24	chr4.2	+	52407222	52407304	ttATTGGGTGAAATCAATGTAGGACCtacactttgaaaatggaactcACATAAAGTGGTGGGACATACATTgatttcacccaa	1	mtr-MIR5269b,	mtr-MIR5269b	ttattgggtgaaatcaatgtagaacctacgctttgaaaatgaaacttacatAAAGTGGTGGGACATACATTGATTtcacccaaaag	mtr-MIR5269b-p5	attgggtgaaatcaatgtagaacc	5'	New	gp1	...((((((((((((((((((...((((((((((....(((.......)))))))).)))))...))))))))))))))))))	80	37.3	-37.6	1.2	19	60	33	32	23	56	22.2824	56.32	37.6657	32.5418	23.4393	54.2244	middle
253	424	mtr-MIR5269b-p3	ACATAAAGTGGTGGGACATACATT	24	chr4.2	+	52407222	52407304	ttATTGGGTGAAATCAATGTAGGACCtacactttgaaaatggaactcACATAAAGTGGTGGGACATACATTgatttcacccaa	1	mtr-MIR5269b,	mtr-MIR5269b	ttattgggtgaaatcaatgtagaacctacgctttgaaaatgaaacttacatAAAGTGGTGGGACATACATTGATTtcacccaaaag	mtr-MIR5269b-p3	acatAAAGTGGTGGGACATACATT	3'	New	gp1	...((((((((((((((((((...((((((((((....(((.......)))))))).)))))...))))))))))))))))))	80	37.3	-37.6	1.2	59	126	109	83	71	81	69.1926	118.272	124.411	84.4053	72.3562	78.4317	middle
254	425	mtr-MIR5271c-p5	AATTGTGGTTACTAACGGTTCAGT	24	chr2.2	+	6915464	6915544	gttcggttcggatAATTGTGGTTACTAACGGTTCAGTtcggttagtgaattgttATCAAAATAATTGTTCGGTTCGAGaat	1	mtr-MIR5271c,	mtr-MIR5271c	gttcggttCGGATAATTGTGGTTACTAACGGTtcagtttggttgtgaattgttatcaaaataattgttcggttcgagaat	mtr-MIR5271c-p5	AATTGTGGTTACTAACGGTtcagt	5'	New	gp1	.((((..((((((((((((..((((((((((......)).)))))))).(((....))).))))))))))))..))))...	27	37	-21.9	0.7	0	10.75	9.83333	6.66667	6.5	7.66667	0	10.0907	11.2236	6.77954	6.62416	7.42358	middle
254	426	mtr-MIR5271c-p3_1ss12TG	ATCAAAATAATGGTTCGGTTCGAG	24	chr2.2	+	6915464	6915544	gttcggttcggatAATTGTGGTTACTAACGGTTCAGTtcggttagtgaattgttATCAAAATAATTGTTCGGTTCGAGaat	1	mtr-MIR5271c,	mtr-MIR5271c	gttcggttCGGATAATTGTGGTTACTAACGGTtcagtttggttgtgaattgttatcaaaataattgttcggttcgagaat	mtr-MIR5271c-p3	atcaaaataattgttcggttcgag	3'	New	gp1	.((((..((((((((((((..((((((((((......)).)))))))).(((....))).))))))))))))..))))...	27	37	-21.9	0.7	0	0	0	0	0	0	0	0	0	0	0	0	low
255	427	mtr-MIR5271e-p5	AATTGTGGTTACTAACGGTTCAGT	24	chr3.3	-	38396671	38396743	tggttcggttcggatAATTGTGGTTACTAACGGTTCAGTTCGGTTAGTGAGTTgttatcaaaataatggttcg	1	mtr-MIR5271e,	mtr-MIR5271e	tggttcggttCGGATAATTGTGGTTACTAACGGTtcagttcggttagtgagttgttatcaaaataatggttcga	mtr-MIR5271e-p5	AATTGTGGTTACTAACGGTtcagt	5'	New	gp1	.(..((((((..((((((.....((((((((((......)).))))))))...))))))..)))..)))..).	71	39.7	-12.3	0.4	0	10.75	9.83333	6.66667	6.5	7.66667	0	10.0907	11.2236	6.77954	6.62416	7.42358	middle
255	428	mtr-MIR5271e-p3_1ss22GA	ACGGTTCAGTTCGGTTAGTGAATT	24	chr3.3	-	38396671	38396743	tggttcggttcggatAATTGTGGTTACTAACGGTTCAGTTCGGTTAGTGAGTTgttatcaaaataatggttcg	1	mtr-MIR5271e,	mtr-MIR5271e	tggttcggttCGGATAATTGTGGTTACTAACGGTtcagttcggttagtgagttgttatcaaaataatggttcga	mtr-MIR5271e-p3	ACGGTtcagttcggttagtgagtt	3'	New	gp1	.(..((((((..((((((.....((((((((((......)).))))))))...))))))..)))..)))..).	71	39.7	-12.3	0.4	0	4	4.83333	2.66667	0	2.66667	0	3.75467	5.51669	2.71182	0	2.58211	low
256	429	mtr-MIR5271a-p5	AATTGTGGTTACTAACGGTTCAGT	24	chr1.2	+	37299761	37299869	ttcggttcggatAATTGTGGTTACTAACGGTTCAGTtcagttattgaattgttatcaaaatAATGGTTCGGTTCAAGAATTGGTTaaatggttcagttaattctgatac	2	mtr-MIR5271a,mtr-MIR5271b,	mtr-MIR5271a	ttcggttCGGATAATTGTGGTTACTAACGGTtcagttcggttaatgaattgttatcaaaataatggttcggttcaagaattggttaaatggttcagttaattctgatacg	mtr-MIR5271a-p5	AATTGTGGTTACTAACGGTtcagt	5'	New	gp1	......(((((((((((.....((((.....(((((((....(..((((..((((....))))..))))..)....))))))).....)))).))))))..)))))...	100	33	-21.8	0.6	0	10.75	9.83333	6.66667	6.5	7.66667	0	10.0907	11.2236	6.77954	6.62416	7.42358	middle
256	430	mtr-MIR5271a-p3_1ss14AG	AATGGTTCGGTTCGAGAATTGGTT	24	chr1.2	+	37299761	37299869	ttcggttcggatAATTGTGGTTACTAACGGTTCAGTtcagttattgaattgttatcaaaatAATGGTTCGGTTCAAGAATTGGTTaaatggttcagttaattctgatac	2	mtr-MIR5271a,mtr-MIR5271b,	mtr-MIR5271a	ttcggttCGGATAATTGTGGTTACTAACGGTtcagttcggttaatgaattgttatcaaaataatggttcggttcaagaattggttaaatggttcagttaattctgatacg	mtr-MIR5271a-p3	aatggttcggttcaagaattggtt	3'	New	gp1	......(((((((((((.....((((.....(((((((....(..((((..((((....))))..))))..)....))))))).....)))).))))))..)))))...	100	33	-21.8	0.6	0	21	0	7	7	0	0	19.712	0	7.11852	7.13371	0	middle
257	431	mtr-MIR5271d-p5	AATTGTGGTTACTAACGGTTCAGT	24	chr2.4	+	26777411	26777488	tttggttcggatAATTGTGGTTACTAACGGTTCAGTtcggttagtgaattgttATCAAAATAATGGTTCGGTTCAAGa	1	mtr-MIR5271d,	mtr-MIR5271d	tttggttCGGATAATTGTGGTTACTAACGGTtcagttcggttaatgaattgttatcaaaataatggttcggttcaaga	mtr-MIR5271d-p5	AATTGTGGTTACTAACGGTtcagt	5'	New	gp1	((((..(((((..(((((..((((((((((......)).)))))))).(((....))).)))))..)))))..)))).	27	35.9	-15.7	0.6	0	10.75	9.83333	6.66667	6.5	7.66667	0	10.0907	11.2236	6.77954	6.62416	7.42358	middle
257	432	mtr-MIR5271d-p3_1ss22AG	ATCAAAATAATGGTTCGGTTCGAG	24	chr2.4	+	26777411	26777488	tttggttcggatAATTGTGGTTACTAACGGTTCAGTtcggttagtgaattgttATCAAAATAATGGTTCGGTTCAAGa	1	mtr-MIR5271d,	mtr-MIR5271d	tttggttCGGATAATTGTGGTTACTAACGGTtcagttcggttaatgaattgttatcaaaataatggttcggttcaaga	mtr-MIR5271d-p3	atcaaaataatggttcggttcaag	3'	New	gp1	((((..(((((..(((((..((((((((((......)).)))))))).(((....))).)))))..)))))..)))).	27	35.9	-15.7	0.6	0	0	0	0	0	0	0	0	0	0	0	0	low
258	433	mtr-miR5272a	GAATTGATTTATGTTTGGATACAC	24	chr1.2	+	33845953	33846019	tGAATTGATTTATGTTTGGATACACtttactaaaagtgattcttatgagttgatgttgtttggatag	1	mtr-MIR5272d,	mtr-MIR5272d	ttggaaatGAATTGATTTATGTTTGGATACACtttactagaagtgattcttacgaattgatgttgtttggatag	mtr-miR5272a	GAATTGATTTATGTTTGGATACAC	5'	Yes	gp1	...((..(((((((...((((.((((((....)))))))))).)))))))..)).............	51	28.4	-13.2	0.7	1	10.65	5.65	6.6	8.6	9.4	1.17276	9.99681	6.44882	6.71174	8.76428	9.10195	low
259	434	mtr-miR5272a_L+2R-2	GAGAATTGATTTATGTTTGGATAC	24	chr1.2	+	14534409	14534509	tgagttgaatGTGAATTGATTTATGTTTGGATACactcatttaaaagtgatttttattagttgatgttgtttggatagtttaaatcaaaattgattttaaa	1	mtr-MIR5272b,	mtr-MIR5272b	tgagttgaatgtGAATTGATTTATGTTTGGATACACtcaattaaaactgatttttattagttgatattgtttggatagtttgaatcaaaattgattttaaa	mtr-miR5272a	GAATTGATTTATGTTTGGATACAC	5'	Diff	gp1	.((((..(...(((.((((....((((..((((((.(((...((((....)))).......))))).))))..))))..)))).)))...)..))))....	96	22.8	-15.1	0.7	3.5	12.4	6.65	13.1	16.1	17.4	4.10465	11.6395	7.5902	13.3218	16.4075	16.8483	middle
260	435	mtr-miR5272a_L+2R-2	GAGAATTGATTTATGTTTGGATAC	24	chr4.1	+	25534314	25534387	ttggatGTGAATTGATTTATGTTTGGATACactttactaaaagtgattcttatgagttgatgttgtttggatag	1	mtr-MIR5272c,	mtr-MIR5272c	ttggaagtGAATTGATTTATGTTTGGATACACtttactagaagtgattcttacgaattgatgttgtttggatag	mtr-miR5272a	GAATTGATTTATGTTTGGATACAC	5'	Diff	gp1	(..(((....((..(((((((...((((.((((((....)))))))))).)))))))..))...)))..)....	70	29.7	-15.5	0.7	3.5	12.4	6.65	13.1	16.1	17.4	4.10465	11.6395	7.5902	13.3218	16.4075	16.8483	middle
261	436	mtr-miR5272a_L+2R-2	GAGAATTGATTTATGTTTGGATAC	24	chr4.2	+	72357952	72358025	ttggatGTGAATTGATTTATGTTTGGATACactttttaaAAGTGATTCTTATGAGTTGATGTTgtttggatagt	1	mtr-MIR5272a,	mtr-MIR5272a	ttggatgtGAATTGATTTATGTTTGGATACACttatttaaaagtgattcatatgagttgatgttgtttggatagt	mtr-miR5272a	GAATTGATTTATGTTTGGATACAC	5'	Diff	gp1	(..(((....((..(((((((...((((.((((((...)))))))))).)))))))..))...)))..).....	69	28.4	-14.4	0.7	3.5	12.4	6.65	13.1	16.1	17.4	4.10465	11.6395	7.5902	13.3218	16.4075	16.8483	middle
261	437	mtr-MIR5272a-p3_2ss10AT18TA	AAGTGATTCTTATGAGTAGATGTT	24	chr4.2	+	72357952	72358025	ttggatGTGAATTGATTTATGTTTGGATACactttttaaAAGTGATTCTTATGAGTTGATGTTgtttggatagt	1	mtr-MIR5272a,	mtr-MIR5272a	ttggatgtGAATTGATTTATGTTTGGATACACttatttaaaagtgattcatatgagttgatgttgtttggatagt	mtr-MIR5272a-p3	aagtgattcatatgagttgatgtt	3'	New	gp1	(..(((....((..(((((((...((((.((((((...)))))))))).)))))))..))...)))..).....	69	28.4	-14.4	0.7	0	4	6	0	0	0	0	3.75467	6.84831	0	0	0	low
262	438	mtr-miR5272a_L+2R-2	GAGAATTGATTTATGTTTGGATAC	24	chr1.2	+	70850228	70850301	tttgagGTGAATTGATTTATGTTTGGATACacttgtttaaAAATGATTCTTATGAGTTGATGTTgtttggatag	1	mtr-MIR5272e,	mtr-MIR5272e	tttgaggtGAATTGATTTATGTTTGGATACACtttcttacaagtgattcttatgaattgatgttgtttgaatag	mtr-miR5272a	GAATTGATTTATGTTTGGATACAC	5'	Diff	gp1	((..((....((..(((((((...((((.((.((......)).)))))).)))))))..))....))..))...	71	28.4	-9.1	0.4	3.5	12.4	6.65	13.1	16.1	17.4	4.10465	11.6395	7.5902	13.3218	16.4075	16.8483	middle
262	439	mtr-MIR5272e-p3_2ss16AG18TA	AAGTGATTCTTATGAGTAGATGTT	24	chr1.2	+	70850228	70850301	tttgagGTGAATTGATTTATGTTTGGATACacttgtttaaAAATGATTCTTATGAGTTGATGTTgtttggatag	1	mtr-MIR5272e,	mtr-MIR5272e	tttgaggtGAATTGATTTATGTTTGGATACACtttcttacaagtgattcttatgaattgatgttgtttgaatag	mtr-MIR5272e-p3	aagtgattcttatgaattgatgtt	3'	New	gp1	((..((....((..(((((((...((((.((.((......)).)))))).)))))))..))....))..))...	71	28.4	-9.1	0.4	0	4	6	0	0	0	0	3.75467	6.84831	0	0	0	low
263	440	mtr-MIR5273-p5_2ss1TA23AC	AAAACCTTCAAAGATTATTAGACC	24	chr6.1	+	60528840	60528917	acatgctTAAACCTTCAAAGATTATTAGACCacctaaggaattAGGGGCTGTAGTTTGAGAAGAGGGtcctaagtcaa	1	mtr-MIR5273,	mtr-MIR5273	acatgcttaaaccttcaaagattattagaacacctaaggaatTAGGGGCTGTAGTTTGAGAAGAGGgtcttaagtcaa	mtr-MIR5273-p5	taaaccttcaaagattattagaac	5'	New	gp1	....(((((.((((((..(((((((.((.((.(((((....)))))))))))))))).....))))))..)))))...	71	39.7	-22.3	0.7	0	5	0	0	0	0	0	4.69334	0	0	0	0	low
263	441	mtr-miR5273_L-1R+1_1ss16GA	AGGGGCTGTAGTTTAAGAAGAGGG	24	chr6.1	+	60528840	60528917	acatgctTAAACCTTCAAAGATTATTAGACCacctaaggaattAGGGGCTGTAGTTTGAGAAGAGGGtcctaagtcaa	1	mtr-MIR5273,	mtr-MIR5273	acatgcttaaaccttcaaagattattagaacacctaaggaatTAGGGGCTGTAGTTTGAGAAGAGGgtcttaagtcaa	mtr-miR5273	TAGGGGCTGTAGTTTGAGAAGAGG	3'	Diff	gp1	....(((((.((((((..(((((((.((.((.(((((....)))))))))))))))).....))))))..)))))...	71	39.7	-22.3	0.7	0	14	0	7	5	40	0	13.1413	0	7.11852	5.09551	38.7317	middle
264	442	mtr-MIR5277-p5_1ss21TC	CTTGGACTTCAAGAAACAACCTTG	24	chr5.3	-	66119718	66119828	ccttgcttgtCTTGGACTTCAAGAAACAACCTTGtttgtcttgcacttcaaggttgtttctcgaagtgcaagacaagcaAGGTTGTTTCTTGAAGTGCAAGGCaagcaagg	1	mtr-MIR5277,	mtr-MIR5277	ccttgcttgtcttggacttcaagaaacaactttgtttgacttgcacttcaaggttgtttctcgaagtgcaagacaagcaAGGTTGTTTCTTGAAGTGCAAGGCaagcaagg	mtr-MIR5277-p5	cttggacttcaagaaacaactttg	5'	New	gp1	((((((((((((((.((((((((((((((((((((((((((((((((((.(((.....))).)))))))))))))))))))))))))))))))))).))))))))))))))	111	44.1	-86.6	1.8	249	490	159	196	335	802	292.016	459.947	181.48	199.318	341.399	776.571	middle
264	443	mtr-miR5277	AGGTTGTTTCTTGAAGTGCAAGGC	24	chr5.3	-	66119718	66119828	ccttgcttgtCTTGGACTTCAAGAAACAACCTTGtttgtcttgcacttcaaggttgtttctcgaagtgcaagacaagcaAGGTTGTTTCTTGAAGTGCAAGGCaagcaagg	1	mtr-MIR5277,	mtr-MIR5277	ccttgcttgtcttggacttcaagaaacaactttgtttgacttgcacttcaaggttgtttctcgaagtgcaagacaagcaAGGTTGTTTCTTGAAGTGCAAGGCaagcaagg	mtr-miR5277	AGGTTGTTTCTTGAAGTGCAAGGC	3'	Yes	gp1	((((((((((((((.((((((((((((((((((((((((((((((((((.(((.....))).)))))))))))))))))))))))))))))))))).))))))))))))))	111	44.1	-86.6	1.8	719	1283	564	951	1369	2297	843.212	1204.31	643.741	967.101	1395.15	2224.17	high
265	444	mtr-MIR5279-p5	TGAATCGGAACCACTCGGATGACT	24	chr1.4	-	22298637	22298733	TGAATCGGAACCACTCGGATGACTcggttagataactcggtccttagattaaatttatATAGTTATTTAACCGGATTGAATCggtgactcggtcact	1	mtr-MIR5279,	mtr-MIR5279	tgaatCGGAACCACTCGGATGACTCGGTTagataactcgatccttagattaaatttatatagttatttaaccggattaactcggtgactcggccact	mtr-MIR5279-p5	tgaatCGGAACCACTCGGATGACT	5'	New	gp1	((.(((((...(((.(((..((..(((((((((((((.......(((((...)))))...)))))))))))))..))...))))))..)))))))..	95	40.2	-23.2	0.6	33	46	51	65	12	42	38.701	43.1787	58.2106	66.1005	12.2292	40.6683	middle
265	445	mtr-MIR5279-p3_2ss5TC22CA	ATAGCTATTTAACCGGATTAAATC	24	chr1.4	-	22298637	22298733	TGAATCGGAACCACTCGGATGACTcggttagataactcggtccttagattaaatttatATAGTTATTTAACCGGATTGAATCggtgactcggtcact	1	mtr-MIR5279,	mtr-MIR5279	tgaatCGGAACCACTCGGATGACTCGGTTagataactcgatccttagattaaatttatatagttatttaaccggattaactcggtgactcggccact	mtr-MIR5279-p3	atagttatttaaccggattaactc	3'	New	gp1	((.(((((...(((.(((..((..(((((((((((((.......(((((...)))))...)))))))))))))..))...))))))..)))))))..	95	40.2	-23.2	0.6	0	16	0	0	7	0	0	15.0187	0	0	7.13371	0	middle
266	446	mtr-miR5280_L-1R+1	AATTAGAAACGGGCCGTGATGGGT	24	chr7.3	+	33365048	33365225	aggcttactatgagaaacggcccaatccatcacggcccgtttctatttacaacccattaataaatatccttttatttagtgcaattttatatcaattctaattataatattgcactgaataaaaggacatttattaatgggctgtAATTAGAAACGGGCCGTGATGGGTtggactgtt	1	mtr-MIR5280,	mtr-MIR5280	aacaggcttactatgagaaacggctcaatccatcacgggccgtttttaattacaacccattaataaatatcattttatttagggcaatattgtatcaattctaattataatattgcactgaataaaaggatacttattaatgggctgTAATTAGAAACGGGCCGTGATGGGttgggctgtt	mtr-miR5280	TAATTAGAAACGGGCCGTGATGGG	3'	Diff	gp1	...............(((((.((((((((((((((((((((((((.(((((.(((((((((((((.(((((((((((((((((((.(((((...........))))).))))))))))))))))))).))))))))))))).))))).)))))))))))))))))))))))).)))))	163	34.8	-104.6	1.7	0	0	0	5	0	6	0	0	0	5.08465	0	5.80976	low
267	447	mtr-MIR5281a-p5_2ss15AG23TC	AATGTATGTATCTAGTCAAGAACC	24	chr6.3	+	66210263	66210424	atactccctccggtcatatttacaagagaaagttgactttttagatacattgaatAATGTATGTATCTAGTCAAGAACCtaaaccaaatacataaattatttaatgtatctaaaaAGTAAATTGTTTCTTGTAAATAGGaccggagggagtatgatatactc	1	mtr-MIR5281a,	mtr-MIR5281a	ttgtgacatactcccttcggtcctatttacaagagaaatttgactttttagatacattaaataatgtatgtatctaatcaagaatctaaaccaaatacataaattatttaatgtatctaaaaagtaaattgtCTCTTGTAAATAGGATCGGAGGGAgtgtatatactc	mtr-MIR5281a-p5	aatgtatgtatctaatcaagaatc	5'	New	gp1	(((((((((((((((.(((((((((((((.((((.(((((((((((((((((((((((.(((((((...((..((...))..))...))))))).))))))))))))))))))))))).)))).))))))))))))).))))))))))))))).........	153	29.6	-80.5	1.7	215	454	284.667	337	393	380	252.143	426.155	324.914	342.706	400.507	367.951	middle
267	448	mtr-MIR5281a-p3	AGTAAATTGTCTCTTGTAAATAGG	24	chr6.3	+	66210263	66210424	atactccctccggtcatatttacaagagaaagttgactttttagatacattgaatAATGTATGTATCTAGTCAAGAACCtaaaccaaatacataaattatttaatgtatctaaaaAGTAAATTGTTTCTTGTAAATAGGaccggagggagtatgatatactc	1	mtr-MIR5281a,	mtr-MIR5281a	ttgtgacatactcccttcggtcctatttacaagagaaatttgactttttagatacattaaataatgtatgtatctaatcaagaatctaaaccaaatacataaattatttaatgtatctaaaaagtaaattgtCTCTTGTAAATAGGATCGGAGGGAgtgtatatactc	mtr-MIR5281a-p3	agtaaattgtCTCTTGTAAATAGG	3'	New	gp1	(((((((((((((((.(((((((((((((.((((.(((((((((((((((((((((((.(((((((...((..((...))..))...))))))).))))))))))))))))))))))).)))).))))))))))))).))))))))))))))).........	153	29.6	-80.5	1.7	49.75	82.75	66.75	47.5	70.75	68.5	58.3446	77.6747	76.1874	48.3042	72.1015	66.328	middle
268	449	mtr-MIR5281c-p5	CCTCCGGTCCTATTTATAAGAGAA	24	chr1.4	+	59564303	59564441	atatttattactcCCTCCGGTCCTATTTATAAGAGAAaatttggtcaaaaaaagttaatgtatttggactgaatttttaactagatacatcaacttttgttgacccaaTTTTCTCTTATAAATAGGACCGGAgggagta	1	mtr-MIR5281c,	mtr-MIR5281c	ggatatatattactacctccggtcctatttataagagaaatttaggtcaacaaaagtgaatgtatttggactgaatttttaactagatacatcaacttttgttgacccaaaattcTCTTATAAATAGGACCGGAGGGAGtactccagtttat	mtr-MIR5281c-p5	cctccggtcctatttataagagaa	5'	New	gp1	........(((((((((((((((((((((((((((((((((.((((((.(((((((.((((((((((.............)))))))))).))))))).)))))).)))))))))))))))))))))))))))))))))	131	30.9	-81.7	1.9	43	80.5	37.6667	52.5	93	25	50.4285	75.5627	42.9921	53.3889	94.7765	24.2073	middle
268	450	mtr-MIR5281c-p3_1ss2AT	ATTTCTCTTATAAATAGGACCGGA	24	chr1.4	+	59564303	59564441	atatttattactcCCTCCGGTCCTATTTATAAGAGAAaatttggtcaaaaaaagttaatgtatttggactgaatttttaactagatacatcaacttttgttgacccaaTTTTCTCTTATAAATAGGACCGGAgggagta	1	mtr-MIR5281c,	mtr-MIR5281c	ggatatatattactacctccggtcctatttataagagaaatttaggtcaacaaaagtgaatgtatttggactgaatttttaactagatacatcaacttttgttgacccaaaattcTCTTATAAATAGGACCGGAGGGAGtactccagtttat	mtr-MIR5281c-p3	aattcTCTTATAAATAGGACCGGA	3'	New	gp1	........(((((((((((((((((((((((((((((((((.((((((.(((((((.((((((((((.............)))))))))).))))))).)))))).)))))))))))))))))))))))))))))))))	131	30.9	-81.7	1.9	69.4167	110.75	69.25	96.8333	97.4167	98.5	81.4088	103.957	79.0409	98.4728	99.2775	95.3768	middle
269	451	mtr-MIR5281f-p5	ATTTGGACTGAATTTTTAACTAGA	24	chr2.2	+	62025415	62025555	tactccctccggtcctatttataagggaaaattaggtcaacagaagttaatgtATTTGGACTGAATTTTTAACTAGAtacattaacttttgttgacccaaATTTCTCTTATAAATAGGACCGGAgggagtattttattagg	1	mtr-MIR5281f,	mtr-MIR5281f	tatagtatcctactacctccggttctatttataagagaaatttaggtcaacaaaagtgaatgtatttggactgaatttttaactagatatatcaacttttgttgacccaaaattcTCTTATAAATAGGACCGGAGGGAGtacttttttagga	mtr-MIR5281f-p5	atttggactgaatttttaactaga	5'	New	gp1	((((((((((((((((((((((((((((((.((.(((((((((((((((((((((((((.............))))))))))))))))))))))))).)).))))))))))))))))))))))))))))))..........	131	33.3	-87.5	1.9	1.66667	0	5	0	0	0	1.95459	0	5.70692	0	0	0	low
269	452	mtr-MIR5281f-p3_1ss2AT	ATTTCTCTTATAAATAGGACCGGA	24	chr2.2	+	62025415	62025555	tactccctccggtcctatttataagggaaaattaggtcaacagaagttaatgtATTTGGACTGAATTTTTAACTAGAtacattaacttttgttgacccaaATTTCTCTTATAAATAGGACCGGAgggagtattttattagg	1	mtr-MIR5281f,	mtr-MIR5281f	tatagtatcctactacctccggttctatttataagagaaatttaggtcaacaaaagtgaatgtatttggactgaatttttaactagatatatcaacttttgttgacccaaaattcTCTTATAAATAGGACCGGAGGGAGtacttttttagga	mtr-MIR5281f-p3	aattcTCTTATAAATAGGACCGGA	3'	New	gp1	((((((((((((((((((((((((((((((.((.(((((((((((((((((((((((((.............))))))))))))))))))))))))).)).))))))))))))))))))))))))))))))..........	131	33.3	-87.5	1.9	69.4167	110.75	69.25	96.8333	97.4167	98.5	81.4088	103.957	79.0409	98.4728	99.2775	95.3768	middle
270	453	mtr-MIR5281b-p5	CCTCCGGTCCTATTTATAAGAGAA	24	chr2.2	-	38988734	38988872	tgtaatactcCCTCCGGTCCTATTTATAAGAGAAagttaggtcaacaaaagttaatgtatttggactgaatttttaactagatacatcaacttttgttgacccaaATTTCTCTTATAAATAGGACCGGAgggagtactt	1	mtr-MIR5281b,	mtr-MIR5281b	ttttctgtaatactacctccggtcctatttataagagaaatttagatcaacataagtgaatgtatttggactgaatttttaactagatacatcaacttttgttgacccaaaattcTCTTATAAATAGGACCGGAGGGAGtacttggaatcac	mtr-MIR5281b-p5	cctccggtcctatttataagagaa	5'	New	gp1	.....((((((((((((((((((((((((((((((.((.((((((((((((((.((((((((((.............)))))))))).)))))))))))))).)).))))))))))))))))))))))))))))))...	131	33.8	-84.4	1.8	43	80.5	37.6667	52.5	93	25	50.4285	75.5627	42.9921	53.3889	94.7765	24.2073	middle
270	454	mtr-MIR5281b-p3_1ss2AT	ATTTCTCTTATAAATAGGACCGGA	24	chr2.2	-	38988734	38988872	tgtaatactcCCTCCGGTCCTATTTATAAGAGAAagttaggtcaacaaaagttaatgtatttggactgaatttttaactagatacatcaacttttgttgacccaaATTTCTCTTATAAATAGGACCGGAgggagtactt	1	mtr-MIR5281b,	mtr-MIR5281b	ttttctgtaatactacctccggtcctatttataagagaaatttagatcaacataagtgaatgtatttggactgaatttttaactagatacatcaacttttgttgacccaaaattcTCTTATAAATAGGACCGGAGGGAGtacttggaatcac	mtr-MIR5281b-p3	aattcTCTTATAAATAGGACCGGA	3'	New	gp1	.....((((((((((((((((((((((((((((((.((.((((((((((((((.((((((((((.............)))))))))).)))))))))))))).)).))))))))))))))))))))))))))))))...	131	33.8	-84.4	1.8	69.4167	110.75	69.25	96.8333	97.4167	98.5	81.4088	103.957	79.0409	98.4728	99.2775	95.3768	middle
271	455	mtr-MIR5282-p5_2ss6CT22TA	AATTCTTTGGTCGCAAAATTTAGT	24	chr1.3	+	13172124	13172250	aaaatttgggagggaaattagtgacggaaaaaataaaattcctcacaAATTCCTTGGTCGCAAAATTTAGTGACGGAATTAGAGAgggatttcatgttttccctcactaaatttccctcactaattt	1	mtr-MIR5282,	mtr-MIR5282	aaaattagggagggaaatttgtgacggaaaacataaaattcctcacaaattccttggtcgcaaaattttgtGACGGAATTAGAGAGGGATTTCATgttttccctcactaaatttccctcactaattt	mtr-MIR5282-p5	aattccttggtcgcaaaattttgt	5'	New	gp1	.....(((((((((((((((((((.((((((.((.(((((((((...((((((...(((((........)))))))))))...))))))))).)).)))))).))))).)))))))))).))))...	119	34.6	-53	1.2	0	10	0	11	0	8	0	9.38667	0	11.1862	0	7.74634	middle
271	456	mtr-MIR5282-p3_1ss8TA	AAAATTTAGTGACGGAATTAGAGA	24	chr1.3	+	13172124	13172250	aaaatttgggagggaaattagtgacggaaaaaataaaattcctcacaAATTCCTTGGTCGCAAAATTTAGTGACGGAATTAGAGAgggatttcatgttttccctcactaaatttccctcactaattt	1	mtr-MIR5282,	mtr-MIR5282	aaaattagggagggaaatttgtgacggaaaacataaaattcctcacaaattccttggtcgcaaaattttgtGACGGAATTAGAGAGGGATTTCATgttttccctcactaaatttccctcactaattt	mtr-MIR5282-p3	aaaattttgtGACGGAATTAGAGA	3'	New	gp1	.....(((((((((((((((((((.((((((.((.(((((((((...((((((...(((((........)))))))))))...))))))))).)).)))))).))))).)))))))))).))))...	119	34.6	-53	1.2	9	7	0	9	0	7	10.5548	6.57067	0	9.15238	0	6.77805	middle
272	457	mtr-MIR5283-p5_1ss9TC	TATCGGGACGTATCGGAAAGTATC	24	chr1.1	+	74830011	74830113	gtatccgtgcgTATCGGGATGTATCGGGAAGTATCggataattattttttttaaaaataaaatttaatatTTGGATACTCTCCGGATACGTATCgggaagtat	1	mtr-MIR5283,	mtr-MIR5283	gtatcCGTGCGTATCGGGATGTATCGGAAagtatcagattattatttttttttaaaataaaatttaatatttggatactccccggatacatatcgggaagtat	mtr-MIR5283-p5	TATCGGGATGTATCGGAAagtatc	5'	New	gp1	...((((((((((((.(((.(((((...((((((..(((..((((((((...)))))))).)))..)))))).)))))..))).)))))))).))))......	94	34	-32	0.9	7	11	7	6	0	10	8.2093	10.3253	7.98969	6.10158	0	9.68293	middle
272	458	mtr-MIR5283-p3_2ss11CT20AG	TTGGATACTCTCCGGATACGTATC	24	chr1.1	+	74830011	74830113	gtatccgtgcgTATCGGGATGTATCGGGAAGTATCggataattattttttttaaaaataaaatttaatatTTGGATACTCTCCGGATACGTATCgggaagtat	1	mtr-MIR5283,	mtr-MIR5283	gtatcCGTGCGTATCGGGATGTATCGGAAagtatcagattattatttttttttaaaataaaatttaatatttggatactccccggatacatatcgggaagtat	mtr-MIR5283-p3	ttggatactccccggatacatatc	3'	New	gp1	...((((((((((((.(((.(((((...((((((..(((..((((((((...)))))))).)))..)))))).)))))..))).)))))))).))))......	94	34	-32	0.9	0	5	0	0	5	7	0	4.69334	0	0	5.09551	6.77805	middle
273	459	mtr-MIR5284g-p5_1ss7CT	AGATTCTTCCACTTTTGGTCCCTC	24	chr3.2	+	73269411	73269615	atttcAGATTCTTCCACTTTTGGTCCCTCctttcatcacgtcagcagaatctgcataaattacgtccctgtaatttcagattcctcccacttttggtccctgtgatttcagattcctccacttttggtccctcattttacgtgccatgtatgcagattctgctgacctggtggaatGAGGGACCAAAAGTGGAAGAATTTgaaat	1	mtr-MIR5284g,	mtr-MIR5284g	atttcatattctttcacttttggtccctcttttcatcaagtcaatagaatctgcataaattacgtacatgtagtttcaaattccttccacttttggtccttgtaatttcagattcctccacttttggtccctcattttacgtgccatgtatgcagattctgcttacgtggtggaatGAGGGACCAAAAGTGGAAGAATCTgaaat	mtr-MIR5284g-p5	agattcctccacttttggtccctc	5'	New	gp1	(((((((((((((((((((((((((((((.((((((((.((((((((((((((((((...(((((..(((.(((..(((...((..........))...)))..))).)))......(((....)))...........))))).....)))))))))))))))))).)))))))).)))))))))))))))))))))))))))))	205	42.9	-104.5	1.2	4	22.5	0	9	8	36	4.69103	21.12	0	9.15238	8.15282	34.8585	middle
273	460	mtr-miR5284a	GAGGGACCAAAAGTGGAAGAATCT	24	chr3.2	+	73269411	73269615	atttcAGATTCTTCCACTTTTGGTCCCTCctttcatcacgtcagcagaatctgcataaattacgtccctgtaatttcagattcctcccacttttggtccctgtgatttcagattcctccacttttggtccctcattttacgtgccatgtatgcagattctgctgacctggtggaatGAGGGACCAAAAGTGGAAGAATTTgaaat	1	mtr-MIR5284g,	mtr-MIR5284g	atttcatattctttcacttttggtccctcttttcatcaagtcaatagaatctgcataaattacgtacatgtagtttcaaattccttccacttttggtccttgtaatttcagattcctccacttttggtccctcattttacgtgccatgtatgcagattctgcttacgtggtggaatGAGGGACCAAAAGTGGAAGAATCTgaaat	mtr-miR5284a	GAGGGACCAAAAGTGGAAGAATCT	3'	Yes	gp1	(((((((((((((((((((((((((((((.((((((((.((((((((((((((((((...(((((..(((.(((..(((...((..........))...)))..))).)))......(((....)))...........))))).....)))))))))))))))))).)))))))).)))))))))))))))))))))))))))))	205	42.9	-104.5	1.2	7.5	20.5	13.5	15.5	12.25	19.5	8.79567	19.2427	15.4087	15.7624	12.484	18.8817	middle
274	461	mtr-MIR5284b-p3	CAAAAGTGGAAGAATCTGAAATT	23	chr1.1	+	38601056	38601163	ctgtaatttcagattcctccacttttggtccctcatttcacgtgccatgtatggagattttgctgacgtggtgaaatgagggacCAAAAGTGGAAGAATCTGAAATTa	1	mtr-MIR5284b,	mtr-MIR5284b	ctgtaatttcagattcctccacttttgatccctcattttacgtgccatgtatgcagattttgctgacgtggtggaatGAGGGATCAAAAGTGGAAGAATCTgaaatta	mtr-MIR5284b-p3	CAAAAGTGGAAGAATCTgaaatt	3'	New	gp1	...(((((((((((((.((((((((((((((((((((((....(((((((...(........)..))))))))))))))))))))))))))))).)))))))))))))	105	41.7	-63	1.4	0	0	0	0	0	0	0	0	0	0	0	0	low
275	462	mtr-MIR5284c-p5_1ss7CT	AGATTCTTCCACTTTTAGTCCCTC	24	chr3.2	+	73269500	73269629	cttttggtccctgtgatttcAGATTCCTCCACTTTTGGTCCCTCattttacgtgccatgtatgcagattctgctgacctggtggaatGAGGGACCAAAAGTGGAAGAATTTgaaattacaggacaaaatc	1	mtr-MIR5284c,	mtr-MIR5284c	cttttggtccctgtaatttcagattcctccacttttagtccctcattttacatgccatgtatgtagattcggctgatgtggtggaatGAGGGACCAAAAGTGGAAGAATCTgaaattacagagacaaaatc	mtr-MIR5284c-p5	agattcctccacttttagtccctc	5'	New	gp1	......((.(((((((((((((((((.(((((((((((((((((((((.....((((.((..((((...))))..)).)))).))))))))))))))))))))).)))))))))))))))))))......	118	43.1	-72	1.3	0	9	7	0	0	0	0	8.448	7.98969	0	0	0	low
275	463	mtr-miR5284a	GAGGGACCAAAAGTGGAAGAATCT	24	chr3.2	+	73269500	73269629	cttttggtccctgtgatttcAGATTCCTCCACTTTTGGTCCCTCattttacgtgccatgtatgcagattctgctgacctggtggaatGAGGGACCAAAAGTGGAAGAATTTgaaattacaggacaaaatc	1	mtr-MIR5284c,	mtr-MIR5284c	cttttggtccctgtaatttcagattcctccacttttagtccctcattttacatgccatgtatgtagattcggctgatgtggtggaatGAGGGACCAAAAGTGGAAGAATCTgaaattacagagacaaaatc	mtr-miR5284a	GAGGGACCAAAAGTGGAAGAATCT	3'	Yes	gp1	......((.(((((((((((((((((.(((((((((((((((((((((.....((((.((..((((...))))..)).)))).))))))))))))))))))))).)))))))))))))))))))......	118	43.1	-72	1.3	7.5	20.5	13.5	15.5	12.25	19.5	8.79567	19.2427	15.4087	15.7624	12.484	18.8817	middle
276	464	mtr-MIR5284f-p5_2ss5CT22AC	TTCTTCCACTTTTGGTCCCTCC	22	chr7.2	-	44964817	44964926	gtaatttcagaTTCCTCCACTTTTGGTCCCTCAttttacgtgccatgtatgcagattctgctgacatggtggaatGAGGGACCAAAAGTGGAAGAATCTaaaattacagg	2	mtr-MIR5284a,mtr-MIR5284f,	mtr-MIR5284f	aatttcatatttctcccacttttggtccctcattttacgtgccatgtatgtagattctgcttacgtggtggaatGAGGGACCAAAAGTGGAAGAATCTaaaattacagg	mtr-MIR5284f-p5	ttctcccacttttggtccctca	5'	New	gp1	(((((((.((((((.(((((((((((((((((((((.....(((((((..((((...))))..))))))).))))))))))))))))))))).)))))).)))))))...	107	41.8	-64.3	1.4	0	0	0	0	0	0	0	0	0	0	0	0	low
276	465	mtr-miR5284a	GAGGGACCAAAAGTGGAAGAATCT	24	chr7.2	-	44964817	44964926	gtaatttcagaTTCCTCCACTTTTGGTCCCTCAttttacgtgccatgtatgcagattctgctgacatggtggaatGAGGGACCAAAAGTGGAAGAATCTaaaattacagg	2	mtr-MIR5284a,mtr-MIR5284f,	mtr-MIR5284f	aatttcatatttctcccacttttggtccctcattttacgtgccatgtatgtagattctgcttacgtggtggaatGAGGGACCAAAAGTGGAAGAATCTaaaattacagg	mtr-miR5284a	GAGGGACCAAAAGTGGAAGAATCT	3'	Yes	gp1	(((((((.((((((.(((((((((((((((((((((.....(((((((..((((...))))..))))))).))))))))))))))))))))).)))))).)))))))...	107	41.8	-64.3	1.4	7.5	20.5	13.5	15.5	12.25	19.5	8.79567	19.2427	15.4087	15.7624	12.484	18.8817	middle
277	466	mtr-MIR5284e-p5_1ss7CT	AGATTCTTCCACTTTTGGTCCCTC	24	chr1.3	+	34592825	34592943	gtccctgtaatttcAGATTCCTCCACTTTTGGTCCCTCatttcaagtgccatgtatgcagattatgttgatgtggtgaaatGAGGGACCAAAAGTGGAAGAATCTgaaattacggggac	1	mtr-MIR5284e,	mtr-MIR5284e	gtccctgtaattttagattcctccacttttggtccctcattttatgtcccatgtatgcaaattctgcttacgtggtggaatGAGGGACCAAAAGTGGAAGAATCTgaaattatggggac	mtr-MIR5284e-p5	agattcctccacttttggtccctc	5'	New	gp1	((((((((((((((((((((.((((((((((((((((((((((....((((..(..(((.....)))..)..)))))))))))))))))))))))))).))))))))))))))))))))	119	42.9	-80.9	1.6	4	22.5	0	9	8	36	4.69103	21.12	0	9.15238	8.15282	34.8585	middle
277	467	mtr-miR5284a	GAGGGACCAAAAGTGGAAGAATCT	24	chr1.3	+	34592825	34592943	gtccctgtaatttcAGATTCCTCCACTTTTGGTCCCTCatttcaagtgccatgtatgcagattatgttgatgtggtgaaatGAGGGACCAAAAGTGGAAGAATCTgaaattacggggac	1	mtr-MIR5284e,	mtr-MIR5284e	gtccctgtaattttagattcctccacttttggtccctcattttatgtcccatgtatgcaaattctgcttacgtggtggaatGAGGGACCAAAAGTGGAAGAATCTgaaattatggggac	mtr-miR5284a	GAGGGACCAAAAGTGGAAGAATCT	3'	Yes	gp1	((((((((((((((((((((.((((((((((((((((((((((....((((..(..(((.....)))..)..)))))))))))))))))))))))))).))))))))))))))))))))	119	42.9	-80.9	1.6	7.5	20.5	13.5	15.5	12.25	19.5	8.79567	19.2427	15.4087	15.7624	12.484	18.8817	middle
278	468	mtr-MIR5285c-p5_2ss8TC17GA	TCTTGGTCACGGGAAGAGATT	21	chr3.1	-	87321221	87321334	aaacactattaggattgagtcTCTTGGTCACGGGAAGAGATTgggactTTGGGTAGAATTAGGCGGGAGACTtattcttataacccattgatatctcttttgtaaagtaactca	1	mtr-MIR5285c,	mtr-MIR5285c	aaacactattaggattggagtctcttggttacgggaagggatTGGGACTTTGGGTAGAATTAGGCGgaagacttattcttgtaacccattgatttctctttgtaacgaaactca	mtr-MIR5285c-p5	tcttggttacgggaagggatT	5'	New	gp1	...............(((((..(((...((...((((((((........((((((((((.((........)).)))))....))))).....))))))))))..)))..)))))	99	38.6	-25.4	0.6	0	5	0	0	6	2.5	0	4.69334	0	0	6.11461	2.42073	middle
278	469	mtr-MIR5285c-p3_1ss19AG	TTGGGTAGAATTAGGCGGGAGACT	24	chr3.1	-	87321221	87321334	aaacactattaggattgagtcTCTTGGTCACGGGAAGAGATTgggactTTGGGTAGAATTAGGCGGGAGACTtattcttataacccattgatatctcttttgtaaagtaactca	1	mtr-MIR5285c,	mtr-MIR5285c	aaacactattaggattggagtctcttggttacgggaagggatTGGGACTTTGGGTAGAATTAGGCGgaagacttattcttgtaacccattgatttctctttgtaacgaaactca	mtr-MIR5285c-p3	TTGGGTAGAATTAGGCGgaagact	3'	New	gp1	...............(((((..(((...((...((((((((........((((((((((.((........)).)))))....))))).....))))))))))..)))..)))))	99	38.6	-25.4	0.6	20.5	33	25	24.5	29	45.5	24.0415	30.976	28.5346	24.9148	29.554	44.0573	middle
279	470	mtr-MIR5285a-p5_1ss18AG	TTGGGTAGAATTAGGCGGGAGACT	24	chr2.1	+	10769252	10769324	gagattgggactTTGGGTAGAATTAGGCGAGAGACTtATTCTTGTAACCCATTGATATCTCttttgtaaagtt	2	mtr-MIR5285a,mtr-MIR5285b,	mtr-MIR5285a	gagatTGGGACTTTGGGTAGAATTAGGCGagagacttattcttgtaacccattgatatctcttttgtaaagtt	mtr-MIR5285a-p5	TTGGGTAGAATTAGGCGagagact	5'	New	gp1	(((((........((((((((((.((........)).)))))....))))).....)))))............	38	37	-14.8	0.5	20.5	33	25	24.5	29	45.5	24.0415	30.976	28.5346	24.9148	29.554	44.0573	middle
279	471	mtr-MIR5285a-p3_1ss14AT	ATTCTTGTAACCCTTTGATATCTC	24	chr2.1	+	10769252	10769324	gagattgggactTTGGGTAGAATTAGGCGAGAGACTtATTCTTGTAACCCATTGATATCTCttttgtaaagtt	2	mtr-MIR5285a,mtr-MIR5285b,	mtr-MIR5285a	gagatTGGGACTTTGGGTAGAATTAGGCGagagacttattcttgtaacccattgatatctcttttgtaaagtt	mtr-MIR5285a-p3	attcttgtaacccattgatatctc	3'	New	gp1	(((((........((((((((((.((........)).)))))....))))).....)))))............	38	37	-14.8	0.5	0	7	0	0	0	0	0	6.57067	0	0	0	0	low
280	472	mtr-MIR5286a-p5	TGTCCAGTGTTTGATTTGTAAAAC	24	chr1.2	+	49092923	49093000	aacaactttagtTGTCCAGTGTTTGATTTGTAAAACagtttcaggtacAGGACAAACTGGAGGCAAGGGACAggacaa	1	mtr-MIR5286a,	mtr-MIR5286a	aacaattttagttgtccagtgtttgatttgtaaaactgtttcaagtaCAGGACAAACTGGAGGCAAGGGACaggacaa	mtr-MIR5286a-p5	tgtccagtgtttgatttgtaaaac	5'	New	gp1	.....((..((((((((.(((..(((.(((.....)))..)))..))).)))))).))..))................	57	41	-20.7	0.6	0	4	3	10	0	3.5	0	3.75467	3.42415	10.1693	0	3.38902	middle
280	473	mtr-miR5286a_L-1R+1	AGGACAAACTGGAGGCAAGGGACA	24	chr1.2	+	49092923	49093000	aacaactttagtTGTCCAGTGTTTGATTTGTAAAACagtttcaggtacAGGACAAACTGGAGGCAAGGGACAggacaa	1	mtr-MIR5286a,	mtr-MIR5286a	aacaattttagttgtccagtgtttgatttgtaaaactgtttcaagtaCAGGACAAACTGGAGGCAAGGGACaggacaa	mtr-miR5286a	CAGGACAAACTGGAGGCAAGGGAC	3'	Diff	gp1	.....((..((((((((.(((..(((.(((.....)))..)))..))).)))))).))..))................	57	41	-20.7	0.6	24.5	58.5	42.5	57	46	62.5	28.7325	54.912	48.5088	57.9651	46.8787	60.5183	middle
281	474	mtr-MIR5286b-p5	TGTCCAGTGTTTGATTTGTAAAAC	24	chr1.2	-	31654859	31654957	atgaaggacaggacagaacaactctagtTGTCCAGTGTTTGATTTGTAAAACagtttcaggtacAGGACAAACTGGAGGCAAGGGACAggacaaaaact	1	mtr-MIR5286b,	mtr-MIR5286b	atgaaggacatgacagaataactccagttgtccagtgtttgatttgtaaaacagtttcaggaagaggACAAACTGGAGGCAAGGGACAGGAcaaaaacta	mtr-MIR5286b-p5	tgtccagtgtttgatttgtaaaac	5'	New	gp1	.....................((((((((((((.(((..(((.(((.....)))..)))..))).)))).)))))))).....................	57	42.4	-24.6	0.6	0	4	3	10	0	3.5	0	3.75467	3.42415	10.1693	0	3.38902	middle
281	475	mtr-MIR5286b-p3	AGGACAAACTGGAGGCAAGGGACA	24	chr1.2	-	31654859	31654957	atgaaggacaggacagaacaactctagtTGTCCAGTGTTTGATTTGTAAAACagtttcaggtacAGGACAAACTGGAGGCAAGGGACAggacaaaaact	1	mtr-MIR5286b,	mtr-MIR5286b	atgaaggacatgacagaataactccagttgtccagtgtttgatttgtaaaacagtttcaggaagaggACAAACTGGAGGCAAGGGACAGGAcaaaaacta	mtr-MIR5286b-p3	aggACAAACTGGAGGCAAGGGACA	3'	New	gp1	.....................((((((((((((.(((..(((.(((.....)))..)))..))).)))).)))))))).....................	57	42.4	-24.6	0.6	24.5	58.5	42.5	57	46	62.5	28.7325	54.912	48.5088	57.9651	46.8787	60.5183	middle
282	476	mtr-MIR5287a-p5_2ss5GA24TC	TTCAATTAATGATGTATGTGGTCC	24	chr5.4	+	76209904	76210060	aatacaccttccggtcactaatataagcaaaaatctactttttagatacaTTCAATGAATGATGTATGTGGTCTttattatatgccacatacatcattaattaaatgtatctaaaaagtaaatttTTGCTTATATTAGTGACCGAAGGGtgtactac	1	mtr-MIR5287a,	mtr-MIR5287a	aaaaatacaccttccgctcactaatataagcaaaaatctaattttttagatacattcagttaatgatgtatgtggtctttattatatgttatatacatcattaattgaatatatttaaaaaatatattttTGCTTATATTAGTGACCGGAGGATctactacaat	mtr-MIR5287a-p5	ttcagttaatgatgtatgtggtct	5'	New	gp1	..((((((((.(((((((((((((((((((((((.(((((((((((((((((.(((.(((((((((((((((...........))))))))))))))).))).))))))))))))))))).))))))))))))))))))))))).))))))))....	151	28.7	-90.2	2	31	123	56	83	87	93	36.3554	115.456	63.9175	84.4053	88.6619	90.0512	middle
282	477	mtr-miR5287a_L+1R-1_1ss24AG	TTGCTTATATTAGTGACCGGAGGG	24	chr5.4	+	76209904	76210060	aatacaccttccggtcactaatataagcaaaaatctactttttagatacaTTCAATGAATGATGTATGTGGTCTttattatatgccacatacatcattaattaaatgtatctaaaaagtaaatttTTGCTTATATTAGTGACCGAAGGGtgtactac	1	mtr-MIR5287a,	mtr-MIR5287a	aaaaatacaccttccgctcactaatataagcaaaaatctaattttttagatacattcagttaatgatgtatgtggtctttattatatgttatatacatcattaattgaatatatttaaaaaatatattttTGCTTATATTAGTGACCGGAGGATctactacaat	mtr-miR5287a	TGCTTATATTAGTGACCGGAGGAT	3'	Diff	gp1	..((((((((.(((((((((((((((((((((((.(((((((((((((((((.(((.(((((((((((((((...........))))))))))))))).))).))))))))))))))))).))))))))))))))))))))))).))))))))....	151	28.7	-90.2	2	222	364.5	230	259	274	375	260.352	342.144	262.518	263.385	279.234	363.11	middle
283	478	mtr-MIR5287b-p5_2ss20GC24AT	CTCCGGTCACTATTATAAGCAAAT	24	chr4.4	-	21436242	21436394	actacatcCTCCGGTCACTATTATAAGCAAAAatcaacattctaggttcatgcattaaatgatgtatgtagtctataataaagactacatacatcatttaatgaatgaacctaaaatgttgatttTTGCTTATAATAGTGACCGGAGGGtgta	1	mtr-MIR5287b,	mtr-MIR5287b	aaggactatatcctccggtcactattataaggaaaaattaacattttagaatcattcgttaaatgatgtatgtagtctataataaagaccacatacatcatttaatgaatgaatctaaaatattaactttTGCTTATAATAGTGATCGGAGGGTgtagttagt	mtr-MIR5287b-p5	ctccggtcactattataaggaaaa	5'	New	gp1	..(((((((((((((((((((((((((((((((((((((((.(((((((((.((((((((((((((((((((((.......)))))))))))))))))))))).))))))))).)))))))))))))))))))))))))))))))))))))))	151	31.4	-110	2.3	102	270	178	172	157	137	119.621	253.44	203.166	174.912	159.999	132.656	middle
283	479	mtr-miR5287b_L+1R-1_1ss17TC	TTGCTTATAATAGTGACCGGAGGG	24	chr4.4	-	21436242	21436394	actacatcCTCCGGTCACTATTATAAGCAAAAatcaacattctaggttcatgcattaaatgatgtatgtagtctataataaagactacatacatcatttaatgaatgaacctaaaatgttgatttTTGCTTATAATAGTGACCGGAGGGtgta	1	mtr-MIR5287b,	mtr-MIR5287b	aaggactatatcctccggtcactattataaggaaaaattaacattttagaatcattcgttaaatgatgtatgtagtctataataaagaccacatacatcatttaatgaatgaatctaaaatattaactttTGCTTATAATAGTGATCGGAGGGTgtagttagt	mtr-miR5287b	TGCTTATAATAGTGATCGGAGGGT	3'	Diff	gp1	..(((((((((((((((((((((((((((((((((((((((.(((((((((.((((((((((((((((((((((.......)))))))))))))))))))))).))))))))).)))))))))))))))))))))))))))))))))))))))	151	31.4	-110	2.3	203.5	443.5	229	361	345.667	715	238.656	416.299	261.377	367.112	352.27	692.329	middle
284	480	lja-MIR5287d-p5_2ss18CG20AG	TTCAATAAATGATGTATGTGGTCT	24	chr5.3	+	28224162	28224304	cctccggttactattataagcaaaaaaactacattttagattcaTTCATTAAATGATGTATGTGGTCTataataaagaccacatacatcatttaatgaatgaatctaaaatgtagtttttTTGCTTATAATAGTGACCGGAgg	1	lja-MIR5287d,	lja-MIR5287d	cctccgattactattatcataaaaagaaacaagtttttaaattcgttcaataaatgatgtatctagtctataataatgactagatacattatttattcaattaatttaaaatgttattttTTTGCTTATAATAGTGACCGGagg	lja-MIR5287d-p5	ttcaataaatgatgtatctagtct	5'	New	gp1	((((((((((((((((((((((((((((((((((((((((((((((((((((((((((((((((((((.......))))))))))))))))))))))))))))))))))))))))))))))))))))))))))))))))))))	143	28.7	-108.5	2.6	12	30	26	13	50	28	14.0731	28.16	29.676	13.2201	50.9551	27.1122	middle
284	481	lja-miR5287a-3p_L-1R+1	TTGCTTATAATAGTGACCGGA	21	chr5.3	+	28224162	28224304	cctccggttactattataagcaaaaaaactacattttagattcaTTCATTAAATGATGTATGTGGTCTataataaagaccacatacatcatttaatgaatgaatctaaaatgtagtttttTTGCTTATAATAGTGACCGGAgg	1	lja-MIR5287d,	lja-MIR5287d	cctccgattactattatcataaaaagaaacaagtttttaaattcgttcaataaatgatgtatctagtctataataatgactagatacattatttattcaattaatttaaaatgttattttTTTGCTTATAATAGTGACCGGagg	lja-miR5287a-3p	TTTGCTTATAATAGTGACCGG	3'	Diff	gp1	((((((((((((((((((((((((((((((((((((((((((((((((((((((((((((((((((((.......))))))))))))))))))))))))))))))))))))))))))))))))))))))))))))))))))))	143	28.7	-108.5	2.6	172	234.5	187	217	197	218	201.714	220.117	213.439	220.674	200.763	211.088	middle
285	482	lja-MIR5287c-p5	TTTAGGTTCATTCAATAAATG	21	chr7.4	+	38614646	38614797	gtacaccctccagtcacaaatataagcaaaaatttaattTTAAGGTTCATTCAATAAATGatgtatgtggactaatagtccacatacatcatttattgaatgaaccttaaaagtaaatttTTGCTTATATTTGTGACCGGAGGGtgtagtaa	1	lja-MIR5287c,	lja-MIR5287c	ttacgtacaccctccggttataaatataaggaaaaaataatattttaggttcattcaataaatgcatgtatctagtcaatactagatacatgcatttattgaatgaacctaaaatgttattttttGCTTATATTTGTGACCGGAGGGTGtacgtaa	lja-MIR5287c-p5	tttaggttcattcaataaatg	5'	New	gp1	.((((((((((.((((((((((((((((((((((((.(((((((((((((((((((((((((((((((((((.....))))))))))))))))))))))))))))))))))).)))))))))))))))))))))))).))))))))))....	147	30.3	-107.6	2.3	0	13	8	21	0	5	0	12.2027	9.13107	21.3555	0	4.84146	middle
285	483	lja-MIR5287c-p3_1ss12TA	TTGCTTATATTAGTGACCGGAGGG	24	chr7.4	+	38614646	38614797	gtacaccctccagtcacaaatataagcaaaaatttaattTTAAGGTTCATTCAATAAATGatgtatgtggactaatagtccacatacatcatttattgaatgaaccttaaaagtaaatttTTGCTTATATTTGTGACCGGAGGGtgtagtaa	1	lja-MIR5287c,	lja-MIR5287c	ttacgtacaccctccggttataaatataaggaaaaaataatattttaggttcattcaataaatgcatgtatctagtcaatactagatacatgcatttattgaatgaacctaaaatgttattttttGCTTATATTTGTGACCGGAGGGTGtacgtaa	lja-MIR5287c-p3	ttGCTTATATTTGTGACCGGAGGG	3'	New	gp1	.((((((((((.((((((((((((((((((((((((.(((((((((((((((((((((((((((((((((((.....))))))))))))))))))))))))))))))))))).)))))))))))))))))))))))).))))))))))....	147	30.3	-107.6	2.3	222	364.5	230	259	274	375	260.352	342.144	262.518	263.385	279.234	363.11	middle
286	484	mtr-MIR5289a-p5_2ss20GA23TC	AGTTAACTGCCGAATTATGAAACC	24	chr3.3	-	3948747	3948847	ggtAGTTAACTGCCGAATTATGAAACCggctgcagttaactatcgaggaaaacttcggcagtaaactaccgAGGAAAATTGAAAACTTCGGCAGTtaactg	1	mtr-MIR5289a,	mtr-MIR5289a	ggtagttaactgccgaattatggaatcggttgcagttaactatcgaggaaaacttcggcagtaaactatCGAGGAAAACTGAAAACTTCGGCAgttaactgtc	mtr-MIR5289a-p5	agttaactgccgaattatggaatc	5'	New	gp1	..(((((((((((((((................((((.(((..(((((....)))))..))).))))..(((......))).....)))))))))))))))	99	42.6	-34.2	0.8	191	322	267	232	232	315	223.996	302.251	304.75	235.928	236.432	305.012	middle
286	485	mtr-MIR5289a-p3_1ss8CT	AGGAAAATTGAAAACTTCGGCAGT	24	chr3.3	-	3948747	3948847	ggtAGTTAACTGCCGAATTATGAAACCggctgcagttaactatcgaggaaaacttcggcagtaaactaccgAGGAAAATTGAAAACTTCGGCAGTtaactg	1	mtr-MIR5289a,	mtr-MIR5289a	ggtagttaactgccgaattatggaatcggttgcagttaactatcgaggaaaacttcggcagtaaactatCGAGGAAAACTGAAAACTTCGGCAgttaactgtc	mtr-MIR5289a-p3	AGGAAAACTGAAAACTTCGGCAgt	3'	New	gp1	..(((((((((((((((................((((.(((..(((((....)))))..))).))))..(((......))).....)))))))))))))))	99	42.6	-34.2	0.8	35	97	88	109	62	107	41.0465	91.0507	100.442	110.845	63.1843	103.607	middle
287	486	mtr-MIR5290-p5_1ss21AC	AAGATCCTCTCCATTTATAACTTT	24	chr8.3	+	27591328	27591403	gaaaaaagggtcAAGATCTTCTCCATTTATAACTTTtttcatttgttgCAATTTGGAGAGAGATAGACACAtaaaa	1	mtr-MIR5290,	mtr-MIR5290	aaccggaaaaatgggtcaagatcctctccatttataaattttttcatttgttgtAATTTGGAGAGAGATAGACACATAaaataagtg	mtr-MIR5290-p5	aagatcctctccatttataaattt	5'	New	gp1	.........(((...((((((((((....((((...........)))).....)))))).)))).)))........	59	30.3	-13.8	0.6	0	6	5	5	0	0	0	5.632	5.70692	5.08465	0	0	low
287	487	mtr-miR5290_L+1R-2	CAATTTGGAGAGAGATAGACACA	23	chr8.3	+	27591328	27591403	gaaaaaagggtcAAGATCTTCTCCATTTATAACTTTtttcatttgttgCAATTTGGAGAGAGATAGACACAtaaaa	1	mtr-MIR5290,	mtr-MIR5290	aaccggaaaaatgggtcaagatcctctccatttataaattttttcatttgttgtAATTTGGAGAGAGATAGACACATAaaataagtg	mtr-miR5290	AATTTGGAGAGAGATAGACACATA	3'	Diff	gp1	.........(((...((((((((((....((((...........)))).....)))))).)))).)))........	59	30.3	-13.8	0.6	102	148	84	91	109	99	119.621	138.923	95.8763	92.5407	111.082	95.861	middle
288	488	mtr-MIR5292a-p5	CAAGTCCTTTTAGTTTTTGAATC	23	chr1.2	+	82109324	82109419	caaaCAAGTCCTTTTAGTTTTTGAATCgtttcaaacgagtccttttagaggatgatggtgatgATTCAGATGATAGCAACAAAGAGCattatccac	1	mtr-MIR5292a,	mtr-MIR5292a	caaacaagtccttttagtttttgaatcgtttcaaacgagtccttttagaggatgatgatgatgATTCAGATGATAGCAACAAAGAGCattatccac	mtr-MIR5292a-p5	caagtccttttagtttttgaatc	5'	New	gp1	.......(..((((..((((((((((((((........((((((...))))))......)))))))))))....)))...))))..).........	80	36.5	-18.8	0.5	37	77.5	67	83	49	32	43.392	72.7467	76.4727	84.4053	49.936	30.9854	middle
288	489	mtr-miR5292a	ATTCAGATGATAGCAACAAAGAGC	24	chr1.2	+	82109324	82109419	caaaCAAGTCCTTTTAGTTTTTGAATCgtttcaaacgagtccttttagaggatgatggtgatgATTCAGATGATAGCAACAAAGAGCattatccac	1	mtr-MIR5292a,	mtr-MIR5292a	caaacaagtccttttagtttttgaatcgtttcaaacgagtccttttagaggatgatgatgatgATTCAGATGATAGCAACAAAGAGCattatccac	mtr-miR5292a	ATTCAGATGATAGCAACAAAGAGC	3'	Yes	gp1	.......(..((((..((((((((((((((........((((((...))))))......)))))))))))....)))...))))..).........	80	36.5	-18.8	0.5	40.5	87	51.5	64	37	62.5	47.4966	81.664	58.7813	65.0836	37.7068	60.5183	middle
289	490	mtr-MIR5292b-p5_1ss24AC	TTTTGAATCGTTTCAAACAAGTCC	24	chr3.3	+	47686512	47686608	tcccaaacaagtccttttagtTTTTGAATCGTTTCAAACAAGTCAttttagaggatgatgatgatgATTCAGATGATAGCAACAAAGAGCattatcc	1	mtr-MIR5292b,	mtr-MIR5292b	tcccaaacaagttcttttattttttgaatcgtttcaaacaagtcattttaaaggatgatgatgatgATTCAGATGATAGCAACAAAGAGCattatcc	mtr-MIR5292b-p5	ttttgaatcgtttcaaacaagtca	5'	New	gp1	..........(..((((..((((((((((((((........((((((......))))))...)))))))))))....)))...))))..).......	80	34	-16.8	0.5	0	6.5	0	12	3	6	0	6.10134	0	12.2032	3.05731	5.80976	middle
289	491	mtr-miR5292a	ATTCAGATGATAGCAACAAAGAGC	24	chr3.3	+	47686512	47686608	tcccaaacaagtccttttagtTTTTGAATCGTTTCAAACAAGTCAttttagaggatgatgatgatgATTCAGATGATAGCAACAAAGAGCattatcc	1	mtr-MIR5292b,	mtr-MIR5292b	tcccaaacaagttcttttattttttgaatcgtttcaaacaagtcattttaaaggatgatgatgatgATTCAGATGATAGCAACAAAGAGCattatcc	mtr-miR5292a	ATTCAGATGATAGCAACAAAGAGC	3'	Yes	gp1	..........(..((((..((((((((((((((........((((((......))))))...)))))))))))....)))...))))..).......	80	34	-16.8	0.5	40.5	87	51.5	64	37	62.5	47.4966	81.664	58.7813	65.0836	37.7068	60.5183	middle
290	492	mtr-MIR5294c-p5_1ss5AG	AGAGGTCCCTGCCCTCAGCCGTTT	24	chr1.2	-	68541635	68541751	cccaatgAGAGGTCCCTGCCCTCAGCCGGTTagctatttaaacgtcatcccatcagacggttaaactattctgaacattctggtgCTAAACGGAATGAGGGTAGTCATCcctctcat	1	mtr-MIR5294c,	mtr-MIR5294c	cccaatgagagatccctgccctcagccgtttagctatttaaatgtcatcccatcagatggttaaactattctaaacattctggtGCTAAACGGAATGAGGGTAGTCATccgtctcat	mtr-MIR5294c-p5	agagatccctgccctcagccgttt	5'	New	gp1	....((((((((...(((((((((.(((.(((((..(((((.((((.........)))).)))))....((.((....)).)).))))).)))..))))))))).....))))))))	113	47.9	-40.8	0.7	16	62	5	60.6667	61	78	18.7641	58.1974	5.70692	61.6938	62.1652	75.5268	middle
290	493	mtr-miR5294a_L-1R+1	CTAAACGGAATGAGGGTAGTCATC	24	chr1.2	-	68541635	68541751	cccaatgAGAGGTCCCTGCCCTCAGCCGGTTagctatttaaacgtcatcccatcagacggttaaactattctgaacattctggtgCTAAACGGAATGAGGGTAGTCATCcctctcat	1	mtr-MIR5294c,	mtr-MIR5294c	cccaatgagagatccctgccctcagccgtttagctatttaaatgtcatcccatcagatggttaaactattctaaacattctggtGCTAAACGGAATGAGGGTAGTCATccgtctcat	mtr-miR5294a	GCTAAACGGAATGAGGGTAGTCAT	3'	Diff	gp1	....((((((((...(((((((((.(((.(((((..(((((.((((.........)))).)))))....((.((....)).)).))))).)))..))))))))).....))))))))	113	47.9	-40.8	0.7	0	5	5.33333	3.33333	1.66667	3	0	4.69334	6.08738	3.38977	1.6985	2.90488	low
291	494	mtr-MIR5294a-p5_1ss4CT	GTTTAGCTATTTAAACGTCATCCC	24	chr5.3	+	53099582	53099692	gagaggtccctgccctcagccGTTTAGCTATTTAAACGTCATCCCatcagacggttaaactattctgaacattctggtgCTAAACGGAATGAGGGTAGTCATCcctctcat	1	mtr-MIR5294a,	mtr-MIR5294a	gagaggttcatgccctcagccgttcagctatttaaacgtcatcccatcagttaaattattctgaatattctggtGCTAAACGGAATGAGGGTAGTCATccctctcat	mtr-MIR5294a-p5	gttcagctatttaaacgtcatccc	5'	New	gp1	((((((...(((((((((.(((((((((..(((((.((((.........)))).)))))....((.((....)).)).)))))))))..))))))))).....))))))..	29	46.8	-43.7	0.8	2	0	0	4.66667	4	0	2.34551	0	0	4.74568	4.07641	0	low
291	495	mtr-miR5294a_L-1R+1	CTAAACGGAATGAGGGTAGTCATC	24	chr5.3	+	53099582	53099692	gagaggtccctgccctcagccGTTTAGCTATTTAAACGTCATCCCatcagacggttaaactattctgaacattctggtgCTAAACGGAATGAGGGTAGTCATCcctctcat	1	mtr-MIR5294a,	mtr-MIR5294a	gagaggttcatgccctcagccgttcagctatttaaacgtcatcccatcagttaaattattctgaatattctggtGCTAAACGGAATGAGGGTAGTCATccctctcat	mtr-miR5294a	GCTAAACGGAATGAGGGTAGTCAT	3'	Diff	gp1	((((((...(((((((((.(((((((((..(((((.((((.........)))).)))))....((.((....)).)).)))))))))..))))))))).....))))))..	29	46.8	-43.7	0.8	0	5	5.33333	3.33333	1.66667	3	0	4.69334	6.08738	3.38977	1.6985	2.90488	low
292	496	mtr-MIR5294b-p5	CTATTTAAACGTCATCCCATCAGA	24	chr3.3	+	43718530	43718640	gagaggtccctgccctcagtcgtttagCTATTTAAACGTCATCCCATCAGAcggttaaactattctgaatattctggtgCTAAACGGAATGAGGGTAGTCATCcctctcct	1	mtr-MIR5294b,	mtr-MIR5294b	gagaggtccatgcccttagccgtttaactatttaaacgtcatcccatcagacggttaaactattctgaactggtGCTAAACGGAATGAGGGTAGTCATccctctcct	mtr-MIR5294b-p5	ctatttaaacgtcatcccatcaga	5'	New	gp1	((((((...(((((((((.(((((((((..(((((.((((.........)))).)))))....((.((....)).)).)))))))))..))))))))).....))))))..	29	45.9	-40.3	0.8	2	14	5	4.66667	10	0	2.34551	13.1413	5.70692	4.74568	10.191	0	middle
292	497	mtr-miR5294a_L-1R+1	CTAAACGGAATGAGGGTAGTCATC	24	chr3.3	+	43718530	43718640	gagaggtccctgccctcagtcgtttagCTATTTAAACGTCATCCCATCAGAcggttaaactattctgaatattctggtgCTAAACGGAATGAGGGTAGTCATCcctctcct	1	mtr-MIR5294b,	mtr-MIR5294b	gagaggtccatgcccttagccgtttaactatttaaacgtcatcccatcagacggttaaactattctgaactggtGCTAAACGGAATGAGGGTAGTCATccctctcct	mtr-miR5294a	GCTAAACGGAATGAGGGTAGTCAT	3'	Diff	gp1	((((((...(((((((((.(((((((((..(((((.((((.........)))).)))))....((.((....)).)).)))))))))..))))))))).....))))))..	29	45.9	-40.3	0.8	0	5	5.33333	3.33333	1.66667	3	0	4.69334	6.08738	3.38977	1.6985	2.90488	low
293	498	mtr-MIR5295a-p3	AGGCTCGGCTCTGGGAATGAAAAG	24	chr5.4	-	4122641	4122711	tggataaggacagggccgtccctaagaattcggAGGCTCGGCTCTGGGAATGAAAAGaggccagtgataaa	1	mtr-MIR5295a,	mtr-MIR5295a	tcagttggtagttttggattagtgacagggccgtccctaagaatttggaggcTCGGCTCTGGGAATGAAAAGAGGCcagtgataaa	mtr-MIR5295a-p3	aggcTCGGCTCTGGGAATGAAAAG	3'	New	gp1	(((.......((((((((..(((..........)))..))))))))..............)))........	36	52.1	-17.8	0.5	101	228	176	233	156	318	118.448	214.016	200.884	236.945	158.98	307.917	middle
294	499	mtr-MIR5297-p5_2ss10AC18GA	TCGGATACTCTCCTGATACGTATC	24	chr1.1	+	43680328	43680392	tgcaggataattaTCGGATACTTTCCTGATACGTATCGGGAAGTATCGGATAattattttttaaa	1	mtr-MIR5297,	mtr-MIR5297	aatgcaggataattatcggatactatcctgatgcgtATCGGGAAGTATCGGATAATTATTttttaaa	mtr-MIR5297-p5	tcggatactatcctgatgcgtATC	5'	New	gp1	.....((((((((((.(((((((.((((((....))))))))))))).)))))))))).......	53	32.3	-27.2	1.3	12	11	0	19	19	18	14.0731	10.3253	0	19.3217	19.3629	17.4293	middle
294	500	mtr-MIR5297-p3_1ss3GA	ATACGTATCGGGAAGTATCGGATA	24	chr1.1	+	43680328	43680392	tgcaggataattaTCGGATACTTTCCTGATACGTATCGGGAAGTATCGGATAattattttttaaa	1	mtr-MIR5297,	mtr-MIR5297	aatgcaggataattatcggatactatcctgatgcgtATCGGGAAGTATCGGATAATTATTttttaaa	mtr-MIR5297-p3	atgcgtATCGGGAAGTATCGGATA	3'	New	gp1	.....((((((((((.(((((((.((((((....))))))))))))).)))))))))).......	53	32.3	-27.2	1.3	0	6	5	7	7	0	0	5.632	5.70692	7.11852	7.13371	0	low
295	501	mtr-MIR5298c-p3_1ss3TG	AAGGTTGATGGAGATGATATGAAG	24	chr4.2	+	81376530	81376615	cattaggttttcttcattttcatctggaatttttctcggatttttgttgttgAAGGTTGATGGAGATGATATGAAGatgaagaaga	1	mtr-MIR5298c,	mtr-MIR5298c	cattaggttttcttcattttctgaaatttttctcggaattttgttgttgaatgtTGATGGAGATGATATGAAGATGAAgaagatgataag	mtr-MIR5298c-p3	aatgtTGATGGAGATGATATGAAG	3'	New	gp1	.......((((((((((((((((.....(((((..(((.(..(((......)))..))))..)))))...))))))))))))))))	79	32.6	-21.8	0.8	1.66667	21.8333	17.6667	3	4.66667	3.33333	1.95459	20.4942	20.1645	3.05079	4.75581	3.22764	middle
296	502	mtr-MIR5298b-p3_1ss4AG	AAGGTTGATGGAGATGATATGAAG	24	chr4.4	-	43842822	43842891	ttaggttttcttcattttcttctgggatttttgttgttgAAGGTTGATGGAGATGATATGAAGatgaaaa	1	mtr-MIR5298b,	mtr-MIR5298b	ttaggttttcttcattttcttctgggattatttttgttgaagatTGATGGAGATGATATGAAGATGAAaaggacgataaa	mtr-MIR5298b-p3	aagatTGATGGAGATGATATGAAG	3'	New	gp1	........(((((((..(((((...((..(((......)))..))...)))))....)))))))......	56	31.4	-13.5	0.6	1.66667	21.8333	17.6667	3	4.66667	3.33333	1.95459	20.4942	20.1645	3.05079	4.75581	3.22764	middle
297	503	mtr-MIR5298d-p5_1ss20AG	TGGGATTCTTGTTGTTGAAGGTTG	24	chr1.1	-	22631673	22631748	ttcttctggattttttcTGGGATTCTTGTTGTTGAAGGTTGATGGAGATGATATGAAGatgaaaaagaggagaaga	1	mtr-MIR5298d,	mtr-MIR5298d	ttcttctggattttttttgggattcttgttgttgaaagtTGATGGAGATGATATGAAGATGAAaaagagaagaagagga	mtr-MIR5298d-p5	tgggattcttgttgttgaaagtTG	5'	New	gp1	(((((((...(((((((.....(((.(((..((.............))..))).)))...))))))))))))))..	74	35.5	-13.2	0.5	0	13	0	11	0	12	0	12.2027	0	11.1862	0	11.6195	middle
297	504	mtr-MIR5298d-p3_1ss3AG	AAGGTTGATGGAGATGATATGAAG	24	chr1.1	-	22631673	22631748	ttcttctggattttttcTGGGATTCTTGTTGTTGAAGGTTGATGGAGATGATATGAAGatgaaaaagaggagaaga	1	mtr-MIR5298d,	mtr-MIR5298d	ttcttctggattttttttgggattcttgttgttgaaagtTGATGGAGATGATATGAAGATGAAaaagagaagaagagga	mtr-MIR5298d-p3	aaagtTGATGGAGATGATATGAAG	3'	New	gp1	(((((((...(((((((.....(((.(((..((.............))..))).)))...))))))))))))))..	74	35.5	-13.2	0.5	1.66667	21.8333	17.6667	3	4.66667	3.33333	1.95459	20.4942	20.1645	3.05079	4.75581	3.22764	middle
298	505	mtr-MIR5299-p3	AATGATTCATTGGTATTGTAAAGC	24	chr1.3	-	10595090	10595179	ttggaaggagagaaaataataaataattaatgatataataggaaaagtaacattAATGATTCATTGATATTGTAAAGCgacaaacaattt	1	mtr-MIR5299,	mtr-MIR5299	ttggaagtagagaaggcaataaataatgaatgatataataggaaaagtaacattaatgaTTCATTGGTATTGTAAAGCGACATacaattt	mtr-MIR5299-p3	aatgaTTCATTGGTATTGTAAAGC	3'	New	gp1	................((((.(((.(((((((.(((..........))).))))))).))).))))...((((......)))).......	50	22.2	-5.6	0.3	0	0	0	0	0	0	0	0	0	0	0	0	low
299	506	mtr-MIR5554c-p5_1ss21CG	TATTCAAGTGTCAAGGAATGGACC	24	chr8.4	+	1203832	1203931	caacatttgatgagcatcttgaacgatggTATTCAAGTGTCAAGGAATGGACCtcatttagttggcacttgaataccatcgttcaagatgctcatcgaat	1	mtr-MIR5554c,	mtr-MIR5554c	caacatgtgaTGTGCATCTTGAACAATGGTATtcaagtgtcaaggaatgcacctcattcttttgacacttgaatACCATCGTTGCAGATGCTCATCgaatgtcgg	mtr-MIR5554c-p5	TATtcaagtgtcaaggaatgcacc	5'	New	gp1	....(((((((((((((((((((((((((((((((((((((((.(((((.....)))))..)))))))))))))))))))))))))))))))))))))))	96	40	-68.5	1.7	0	0	0	0	0	0	0	0	0	0	0	0	low
300	507	mtr-MIR5554b-p5_1ss21CG	TATTCAAGTGTCAAGGAATGGACC	24	chr4.1	+	12866224	12866320	cagcattcgatgagcattttgaatgatggTATTGAAGTGTCAAGGAATGCACCTCATTCTTTTGACACTTgaataccatcatttaaaatgctcatcg	1	mtr-MIR5554b,	mtr-MIR5554b	cagcatgcgaTGTGCATCTTGAACAATGGTATtcaagtgtcaaggaatgcacctcattcttttgacacttgaatACCATCGTTGCAGATGCTCATCggatgtcgg	mtr-MIR5554b-p5	TATtcaagtgtcaaggaatgcacc	5'	New	gp1	.......((((((((((((((((((((((((((.(((((((((((((((.....))))).)))))))))).))))))))))))))))))))))))))	90	37.1	-58.3	1.6	0	0	0	0	0	0	0	0	0	0	0	0	low
300	508	mtr-MIR5554b-p3_1ss4CG	ATGGACCTCATTCTTTTGACACTT	24	chr4.1	+	12866224	12866320	cagcattcgatgagcattttgaatgatggTATTGAAGTGTCAAGGAATGCACCTCATTCTTTTGACACTTgaataccatcatttaaaatgctcatcg	1	mtr-MIR5554b,	mtr-MIR5554b	cagcatgcgaTGTGCATCTTGAACAATGGTATtcaagtgtcaaggaatgcacctcattcttttgacacttgaatACCATCGTTGCAGATGCTCATCggatgtcgg	mtr-MIR5554b-p3	atgcacctcattcttttgacactt	3'	New	gp1	.......((((((((((((((((((((((((((.(((((((((((((((.....))))).)))))))))).))))))))))))))))))))))))))	90	37.1	-58.3	1.6	0	0	0	0	0	0	0	0	0	0	0	0	low
301	509	mtr-MIR5557-p5	CAGGACACTTCTCAACAAGTA	21	chr5.1	+	9323226	9323529	CAGGACACTTCTCAACAAGTAccaaggaagcacaatcagaaagtaactctttactttgttgtgcccattcagtgcattagccatcaacttctccttctgaacatcacatttgttcactactgatttcaaatcatctctttgtttcacaagatcatcaatttgtaaagagagtttgtgtatctgcgcatttgcagttgaagattcactgtcaatttgggtttgtgtactctttgcactcctaagcttgttcataagatcagttttcgaatcaagaagttggttgtgcttcctaagtacttgttga	1	mtr-MIR5557,	mtr-MIR5557	caggacacttctcAACAAGTACTAAGGAAGCACAatcagaaagtaactctttactttgttgtgcccattcagtgcatttagccatcaacctctccttctgaacatcacatttgttcactactgatttcaaatcatctctttgtttcacaagatcatcaatttgtaaagagagtttgtgtatctgagcatttgtagttgaagattcactgtcaatttgggttagtgtactctttgcactcctaagcttgttcataatatcagttttcgaataaagaagttggttgTGCTTCCTTAGTACTTGTTGAtaactgtctt	mtr-MIR5557-p5	caggacacttctcAACAAGTA	5'	New	gp1	...........(((((((((((..(((((((((((((..(((((((....)))))))..((..(.......)..)).........(((((((..(((.(((((.......)))))...((((((((.......................((((.((((((.(((((.......(((((....)))))))))))))))).))))...((.(((((((((...(((((.....))))).)))))).)))..))..))))))))....)))...))))))))))))))))))))..)))))))))))	293	37.8	-84	0.7	9	0	11	25	16	0	10.5548	0	12.5552	25.4233	16.3056	0	middle
302	510	mtr-miR5559-5p	TACTTGGTGAATTGTTGGATC	21	chr6.2	+	2270151	2270287	tatttcctttTACTTGGTGAATTGTTGGATCattatgtatcaatcaaccgcattggagcttcatgtatgagacaagattgacaatagccaaagaagaaacacataacgaTCCAATTATTCACCAAGTAAAaggatac	1	mtr-MIR5559,	mtr-MIR5559	tatttcctttTACTTGGTGAATTGTTGGATCattctgtatcaatcaaccacattgaagcttcatgtataagacaagatcaacgatattcaaagaagaaacacagaacgaTCTAATTATTCACCAAGTAAAaggatacg	mtr-miR5559-5p	TACTTGGTGAATTGTTGGATC	5'	Yes	gp1	....((((((((((((((((((..(((((((.((((((.....((....((((((.....((.(((.....))).))....)))).))....))......)))))).)))))))..))))))))))))))))))...	130	34.3	-49	1	4069	303	218	7847	13165	1202	4771.95	284.416	248.822	7979.86	13416.5	1163.89	high
302	511	mtr-miR5559-3p_1ss3TC	TCCAATTATTCACCAAGTAAA	21	chr6.2	+	2270151	2270287	tatttcctttTACTTGGTGAATTGTTGGATCattatgtatcaatcaaccgcattggagcttcatgtatgagacaagattgacaatagccaaagaagaaacacataacgaTCCAATTATTCACCAAGTAAAaggatac	1	mtr-MIR5559,	mtr-MIR5559	tatttcctttTACTTGGTGAATTGTTGGATCattctgtatcaatcaaccacattgaagcttcatgtataagacaagatcaacgatattcaaagaagaaacacagaacgaTCTAATTATTCACCAAGTAAAaggatacg	mtr-miR5559-3p	TCTAATTATTCACCAAGTAAA	3'	Diff	gp1	....((((((((((((((((((..(((((((.((((((.....((....((((((.....((.(((.....))).))....)))).))....))......)))))).)))))))..))))))))))))))))))...	130	34.3	-49	1	66	0	0	39	62	0	77.4019	0	0	39.6603	63.1843	0	middle
303	512	mtr-miR5743a	TGAGAACTGTTTTCCGCACCTT	22	chr1.2	+	337537	337613	tttggaTGAGAACTGTTTTCCGCACCTTtggctataaaaacaaacaaaggtgggaaaacatttctcatctaaacaat	2	mtr-MIR5743b,mtr-MIR5743a,	mtr-MIR5743a	tttttttggaTGAGAACTGTTTTCCGCACCTTtggaaatacaaacaaacaaaggtgggaaaacatttctcatctaaacaat	mtr-miR5743a	TGAGAACTGTTTTCCGCACCTT	5'	Yes	gp1	((((((((((((.((((((((.((((((((..............)))))))))))))))).))))))))))))....	73	35.1	-37.9	1.4	15	185	199	175	281	109	17.5913	173.653	227.135	177.963	286.368	105.544	middle
304	513	mtr-MIR5745a-p5_1ss22AG	CATCCAATGATGTGTTTCCACGTC	24	chr2.3	+	74135536	74135652	tattttacacatgCATCCAATGATGTGTTTCCACGTCatttgatgaatatgacaactcatgtgttttcatatttattaattgacgtgacaacacatatttggatgcatgtgtaaaat	1	mtr-MIR5745a,	mtr-MIR5745a	tattttacacatgcatccaatgatgtgtttccacatcatttgatcaatatgacaactcgtgtgttttcatatttattaattgaCGTGACAACACATCATTGGATGCAtgtgtaaaat	mtr-MIR5745a-p5	catccaatgatgtgtttccacatc	5'	New	gp1	.(((((((((((((((((((..(((((((..(((((((.(((((((((((((.(((......))).))))))))))))).)))))))..)))))))..)))))))))))))))))))	116	30.8	-64	1.8	0	0	0	5	0	0	0	0	0	5.08465	0	0	low
305	514	mtr-MIR5752a-p5	TGTGCTAAGACCAAATAATGTG	22	chr3.1	-	66975400	66975515	aatatcaagtaatcatatatagattTGTGCTAAGACCAAATAATGTGttgaaaacaaatgtgttgagaatatcaCATTGTTTGGTTTAGTACAAAtttatgggtggttatcaacat	2	mtr-MIR5752a,mtr-MIR5752b,	mtr-MIR5752a	aatatcaagtaatcatctgtagatttgtgctaagaccaaataatgtgttgaaaacaatgtgttgagagtatcaCATTGTTTGGTTTAGTACAAAtttatggatggttatcaacatcaac	mtr-MIR5752a-p5	tgtgctaagaccaaataatgtg	5'	New	gp1	........(((((((..((((((((((((((.(((((((((((((((.....((((....))))........)))))))))))))))))))))))))))))..)))))))......	102	27.6	-42.3	1.3	8	26	0	11	21	40	9.38205	24.4053	0	11.1862	21.4011	38.7317	middle
305	515	mtr-miR5752a	CATTGTTTGGTTTAGTACAAA	21	chr3.1	-	66975400	66975515	aatatcaagtaatcatatatagattTGTGCTAAGACCAAATAATGTGttgaaaacaaatgtgttgagaatatcaCATTGTTTGGTTTAGTACAAAtttatgggtggttatcaacat	2	mtr-MIR5752a,mtr-MIR5752b,	mtr-MIR5752a	aatatcaagtaatcatctgtagatttgtgctaagaccaaataatgtgttgaaaacaatgtgttgagagtatcaCATTGTTTGGTTTAGTACAAAtttatggatggttatcaacatcaac	mtr-miR5752a	CATTGTTTGGTTTAGTACAAA	3'	Yes	gp1	........(((((((..((((((((((((((.(((((((((((((((.....((((....))))........)))))))))))))))))))))))))))))..)))))))......	102	27.6	-42.3	1.3	7	24	0	9	6	12	8.2093	22.528	0	9.15238	6.11461	11.6195	middle
306	516	mtr-miR5754	TATTGCACTCATCTTCCATGGC	22	chr4.2	+	33066176	33066299	tgggataaagattccatgatgagtaTATTGCACTCATCTTCCATGGCtgtcttcttcctccaaggatgtcaattgttcCATGGAGAAGTGTGCAATAAAcatgttgtggaatctatcgacaaga	1	mtr-MIR5754,	mtr-MIR5754	tgggataaagattccatgatgagtaTATTGCACTCATCTTCCATGGCtgttttcttcctccaaggatgtcaattgtgccatggagaagagtgcaataaacttgttgtggtatctatcgacaaga	mtr-miR5754	TATTGCACTCATCTTCCATGGC	5'	Yes	gp1	...(((..((((((((..((..((.((((((((...(((.((((((.........(((.....)))...........)))))))))...)))))))).))..))..))))))))))).......	114	40.3	-42.2	0.8	46	80	7	109	60	214	53.9468	75.0934	7.98969	110.845	61.1461	207.215	middle
306	517	mtr-MIR5754-p3	CATGGAGAAGAGTGCAATAAA	21	chr4.2	+	33066176	33066299	tgggataaagattccatgatgagtaTATTGCACTCATCTTCCATGGCtgtcttcttcctccaaggatgtcaattgttcCATGGAGAAGTGTGCAATAAAcatgttgtggaatctatcgacaaga	1	mtr-MIR5754,	mtr-MIR5754	tgggataaagattccatgatgagtaTATTGCACTCATCTTCCATGGCtgttttcttcctccaaggatgtcaattgtgccatggagaagagtgcaataaacttgttgtggtatctatcgacaaga	mtr-MIR5754-p3	catggagaagagtgcaataaa	3'	New	gp1	...(((..((((((((..((..((.((((((((...(((.((((((.........(((.....)))...........)))))))))...)))))))).))..))..))))))))))).......	114	40.3	-42.2	0.8	0	0	0	0	0	0	0	0	0	0	0	0	low
307	518	mtr-MIR5758-p5_1ss9AG	AATACATTGCTCCAACTTACACC	23	chr6.1	-	78916199	78916390	ggtggatttagttttcaccattgAATACATTGCCCCAACTTACACCactaaaataaccccttgtaacaacttacactaaatgtagtcaccatgagatccaatccgttagaataaatttaaaatatatcaatgacttatATTGAAGTGGTGTAAGTTGAAGCAatgtatttggtggtccaaactaaactttac	1	mtr-MIR5758,	mtr-MIR5758	aaggtggatttagttttcaccactaaatacattactccaacttacaccaataaaataaccctttgtagcaacttacactgtagtcatcatgagatccagtccgttagaataaatttaaatatataaatgacttatattgaagtggtgTAAGTTGGAAGAATGTATTTGatagtccaaactaaactttacactt	mtr-MIR5758-p5	aatacattactccaacttacacc	5'	New	gp1	.((..(((((((((..(((((..((((((((((..((((((((((((((............(((((....)))))...((((((((((...(((...........(((((.....)))))......))).)))).))))))..))))))))))))))..))))))))))..)))))..)))))))).)..))	191	33.3	-62.1	1	0	0	0	0	0	0	0	0	0	0	0	0	low
307	519	mtr-MIR5758-p3_2ss22AG23GC	ATTGAAGTGGTGTAAGTTGGAGCA	24	chr6.1	-	78916199	78916390	ggtggatttagttttcaccattgAATACATTGCCCCAACTTACACCactaaaataaccccttgtaacaacttacactaaatgtagtcaccatgagatccaatccgttagaataaatttaaaatatatcaatgacttatATTGAAGTGGTGTAAGTTGAAGCAatgtatttggtggtccaaactaaactttac	1	mtr-MIR5758,	mtr-MIR5758	aaggtggatttagttttcaccactaaatacattactccaacttacaccaataaaataaccctttgtagcaacttacactgtagtcatcatgagatccagtccgttagaataaatttaaatatataaatgacttatattgaagtggtgTAAGTTGGAAGAATGTATTTGatagtccaaactaaactttacactt	mtr-MIR5758-p3	attgaagtggtgTAAGTTGGAAGA	3'	New	gp1	.((..(((((((((..(((((..((((((((((..((((((((((((((............(((((....)))))...((((((((((...(((...........(((((.....)))))......))).)))).))))))..))))))))))))))..))))))))))..)))))..)))))))).)..))	191	33.3	-62.1	1	0	0	0	0	0	0	0	0	0	0	0	0	low
308	520	mtr-miR5759_1ss8TA	AAGGGGGAGAAAAGATTCAAA	21	chr7.2	-	18862516	18862682	ataatttctgAAGGGGGAGAAAAGATTCAAAtaatgggttaagttgtgtggtggtcatcttagcttctacattatccaacaatagttgtgtatgtagtatgtctaagatagcaaccctcacaatctaatggtctatTGAATCTTTTCTTCCCACTTCAaaagttgta	1	mtr-MIR5759,	mtr-MIR5759	ataatttctgAAGGGGGTGAAAAGATTCAAAtaatcggttaagtgtgtggtggtcatcttagcttctacattatccaacaataattgtgtaagtagtatgtctaagatagcagccctcacaatctaatgtctattgaatcttttcttcccatttcaaaagttgta	mtr-miR5759	AAGGGGGTGAAAAGATTCAAA	5'	Diff	gp1	(((((((.((((((((((((((((((((((.......((((..(((((.(((.(..((((((((..((((((.(..((((....))))..)))))))...).)))))))..).)))..)))))..))))......))))))))))))))))).))))).))))))).	166	34.7	-66.9	1.2	0	0	0	0	0	0	0	0	0	0	0	0	low
308	521	mtr-MIR5759-p3_1ss18TC	TGAATCTTTTCTTCCCACTTCA	22	chr7.2	-	18862516	18862682	ataatttctgAAGGGGGAGAAAAGATTCAAAtaatgggttaagttgtgtggtggtcatcttagcttctacattatccaacaatagttgtgtatgtagtatgtctaagatagcaaccctcacaatctaatggtctatTGAATCTTTTCTTCCCACTTCAaaagttgta	1	mtr-MIR5759,	mtr-MIR5759	ataatttctgAAGGGGGTGAAAAGATTCAAAtaatcggttaagtgtgtggtggtcatcttagcttctacattatccaacaataattgtgtaagtagtatgtctaagatagcagccctcacaatctaatgtctattgaatcttttcttcccatttcaaaagttgta	mtr-MIR5759-p3	tgaatcttttcttcccatttca	3'	New	gp1	(((((((.((((((((((((((((((((((.......((((..(((((.(((.(..((((((((..((((((.(..((((....))))..)))))))...).)))))))..).)))..)))))..))))......))))))))))))))))).))))).))))))).	166	34.7	-66.9	1.2	6	12	16	0	5	13	7.03654	11.264	18.2621	0	5.09551	12.5878	middle
309	522	mtr-miR7696a-5p	TCAAGTTCTCATAATTCAAAA	21	chr6.1	-	21724177	21724269	actgctTCAGGTTCTCATAATTCAAAAcgaaaagtttatgtaagtttttcaaatgtagcttgtctttTTGAATTATGAGAACTTGAAGtatac	1	mtr-MIR7696b,	mtr-MIR7696b	actgctTCAAGTTCTCATAATTCAAAAcgaaaagtttatggaagtttttcaaatgtaacttatctttTTGAATTATGAGAACTTGAAGcatac	mtr-miR7696a-5p	TCAAGTTCTCATAATTCAAAA	5'	Yes	gp1	..(((((((((((((((((((((((((.((.((((((((.............))).))))).)).)))))))))))))))))))))))))...	88	29	-38.5	1.4	25.3333	27	20	30.3333	14.6667	12.3333	29.7098	25.344	22.8277	30.8469	14.9468	11.9423	middle
309	523	mtr-miR7696a-3p	TTGAATTATGAGAACTTGAAG	21	chr6.1	-	21724177	21724269	actgctTCAGGTTCTCATAATTCAAAAcgaaaagtttatgtaagtttttcaaatgtagcttgtctttTTGAATTATGAGAACTTGAAGtatac	1	mtr-MIR7696b,	mtr-MIR7696b	actgctTCAAGTTCTCATAATTCAAAAcgaaaagtttatggaagtttttcaaatgtaacttatctttTTGAATTATGAGAACTTGAAGcatac	mtr-miR7696a-3p	TTGAATTATGAGAACTTGAAG	3'	Yes	gp1	..(((((((((((((((((((((((((.((.((((((((.............))).))))).)).)))))))))))))))))))))))))...	88	29	-38.5	1.4	3513.83	3283.5	2054.83	4536.5	3966.17	2978.67	4120.87	3082.11	2345.35	4613.31	4041.93	2884.22	high
310	524	mtr-miR7696a-5p	TCAAGTTCTCATAATTCAAAA	21	chr6.2	-	34758078	34758163	ctTCAAGTTCTCATAATTCAAAAcgaaaagtttatgtaagtttttcaaatgtagcttgtctttTTGAATTATGAGAACTTGAAGca	1	mtr-MIR7696d,	mtr-MIR7696d	tgctTCAAGTTCTCATAATTCAAAAcgaaaagtttatggaagtttttcaaatgtaacttatctttTTGAATTATGAGAACTTGAAGca	mtr-miR7696a-5p	TCAAGTTCTCATAATTCAAAA	5'	Yes	gp1	(((((((((((((((((((((((.((.((((((((.............))).))))).)).)))))))))))))))))))))))..	84	27.9	-35.4	1.5	25.3333	27	20	30.3333	14.6667	12.3333	29.7098	25.344	22.8277	30.8469	14.9468	11.9423	middle
310	525	mtr-miR7696a-3p	TTGAATTATGAGAACTTGAAG	21	chr6.2	-	34758078	34758163	ctTCAAGTTCTCATAATTCAAAAcgaaaagtttatgtaagtttttcaaatgtagcttgtctttTTGAATTATGAGAACTTGAAGca	1	mtr-MIR7696d,	mtr-MIR7696d	tgctTCAAGTTCTCATAATTCAAAAcgaaaagtttatggaagtttttcaaatgtaacttatctttTTGAATTATGAGAACTTGAAGca	mtr-miR7696a-3p	TTGAATTATGAGAACTTGAAG	3'	Yes	gp1	(((((((((((((((((((((((.((.((((((((.............))).))))).)).)))))))))))))))))))))))..	84	27.9	-35.4	1.5	3513.83	3283.5	2054.83	4536.5	3966.17	2978.67	4120.87	3082.11	2345.35	4613.31	4041.93	2884.22	high
311	526	mtr-miR7696a-5p	TCAAGTTCTCATAATTCAAAA	21	chr6.2	+	34758078	34758163	tgctTCAAGTTCTCATAATTCAAAAagacaagctacatttgaaaaacttacataaacttttcgttTTGAATTATGAGAACTTGAAG	2	mtr-MIR7696a,mtr-MIR7696c,	mtr-MIR7696c	gctTCAAGTTCTCATAATTCAAAAagataagttacatttgaaaaacttccataaacttttcgttTTGAATTATGAGAACTTGAAGc	mtr-miR7696a-5p	TCAAGTTCTCATAATTCAAAA	5'	Yes	gp1	..(((((((((((((((((((((((.((.(((........................))).)).)))))))))))))))))))))))	84	27.9	-31.6	1.3	25.3333	27	20	30.3333	14.6667	12.3333	29.7098	25.344	22.8277	30.8469	14.9468	11.9423	middle
311	527	mtr-miR7696a-3p	TTGAATTATGAGAACTTGAAG	21	chr6.2	+	34758078	34758163	tgctTCAAGTTCTCATAATTCAAAAagacaagctacatttgaaaaacttacataaacttttcgttTTGAATTATGAGAACTTGAAG	2	mtr-MIR7696a,mtr-MIR7696c,	mtr-MIR7696c	gctTCAAGTTCTCATAATTCAAAAagataagttacatttgaaaaacttccataaacttttcgttTTGAATTATGAGAACTTGAAGc	mtr-miR7696a-3p	TTGAATTATGAGAACTTGAAG	3'	Yes	gp1	..(((((((((((((((((((((((.((.(((........................))).)).)))))))))))))))))))))))	84	27.9	-31.6	1.3	3513.83	3283.5	2054.83	4536.5	3966.17	2978.67	4120.87	3082.11	2345.35	4613.31	4041.93	2884.22	high
312	528	stu-MIR8005c-p3_1ss12AG	TAGGGTTTAGGGTTTAGGGTT	21	chr1.3	+	79751078	79751276	ggttTAGGGTTTAGGGTTTAGGGTTtagggtttagggtttagggttagggtttagggtttagggtttagggtttagggtttagggtttagggtttagggtttagggtttagggtttagggtttagggtttagggtttagggtttagggtttagggtttagggtttagggtttaggtttagggtttagggtttagggttt	1	stu-MIR8005c,	stu-MIR8005c	ggtttagtgtttagaatttaggattaagggtttagggtttagggttagggttcaatgtttggagtttaggatataggatttagggtttaggatttagggtttagggattagagtttaggatttagagtttagggtttagagtttgcgtttaggttttagggtttaggcttttgtTTTAGAGTTTAAGGTTTAGAGTTT	stu-MIR8005c-p3	tagggtttaggatttagggtt	3'	New	gp1	..........................................................................................................................................................................(((..(.....)..)))............	1	42.7	1.7	0	0	0	0	0	0	3.5	0	0	0	0	0	3.38902	low
313	529	stu-MIR8005a-p5_1ss12AG	TAGGGTTTAGGGTTTAGGGTT	21	chr1.2	+	86907888	86908014	ttTAGGGTTTAGGGTTTAGGGTTtAGGGTTTAGGGTTTAGGGTTTagggtttagggtttagggtttagggtttagggtttaggggttagggtttagggtttagggtttagggtttagggtttagggt	1	stu-MIR8005a,	stu-MIR8005a	TTTAGAGTTTAAGGTTTAGAGTTTaaggtttggggtttagggtttagggttaagagtatcatggttagggtttagggtttaggggttaggatatagggtttaggatttagggtttagagtttagggt	stu-MIR8005a-p5	tagggtttaggatttagggtt	5'	New	gp1	...............................................................................................................(........)......	1	43.3	1.7	0	0	0	0	0	0	3.5	0	0	0	0	0	3.38902	low
313	530	stu-MIR8005a-p3_1ss11AG	AGGGTTTAGGGTTTAGGGTTT	21	chr1.2	+	86907888	86908014	ttTAGGGTTTAGGGTTTAGGGTTtAGGGTTTAGGGTTTAGGGTTTagggtttagggtttagggtttagggtttagggtttaggggttagggtttagggtttagggtttagggtttagggtttagggt	1	stu-MIR8005a,	stu-MIR8005a	TTTAGAGTTTAAGGTTTAGAGTTTaaggtttggggtttagggtttagggttaagagtatcatggttagggtttagggtttaggggttaggatatagggtttaggatttagggtttagagtttagggt	stu-MIR8005a-p3	agggtttaggatttagggttt	3'	New	gp1	...............................................................................................................(........)......	1	43.3	1.7	0	0	0	0	0	0	3.5	0	0	0	0	0	3.38902	low
1	1	mtr-miR156j_R+2_1ss12GA_1	TGACAGAAGAGAGTGAGCACAA	22	chr1.3	+	7851650	7851743	ataaatTGACAGAAGAGAGTGAGCACAAaaaagcctttagtatatgatgtttataccattacttttgtgTGCTCATGCTCTTCTGACAATtctc	8	mtr-MIR156j,gma-MIR156n,gma-MIR156o,fve-MIR156a,fve-MIR156c,fve-MIR156b,cas-MIR156k,cas-MIR156f,	mtr-MIR156j	acatagaaatTGACAGAAGAGGGTGAGCACaaaaaaagtctttagtatataatgtttataccattatttttgtgtgctcatactcttctgacaattttcaatg	mtr-miR156j	TGACAGAAGAGGGTGAGCAC	5'	Diff	gp2a	...(((((.((((((((..((((((((.(((((......(((((.......))))).....))))).))))))))..)))))))).)))))...	88	34	-35.9	1.1	5	0	0	0	0	0	5.86378	0	0	0	0	0	low
1	2	mtr-MIR156j-p3_1ss8AG_1	TGCTCATGCTCTTCTGACAAT	21	chr1.3	+	7851650	7851743	ataaatTGACAGAAGAGAGTGAGCACAAaaaagcctttagtatatgatgtttataccattacttttgtgTGCTCATGCTCTTCTGACAATtctc	8	mtr-MIR156j,gma-MIR156n,gma-MIR156o,fve-MIR156a,fve-MIR156c,fve-MIR156b,cas-MIR156k,cas-MIR156f,	mtr-MIR156j	acatagaaatTGACAGAAGAGGGTGAGCACaaaaaaagtctttagtatataatgtttataccattatttttgtgtgctcatactcttctgacaattttcaatg	mtr-MIR156j-p3	tgctcatactcttctgacaat	3'	New	gp2a	...(((((.((((((((..((((((((.(((((......(((((.......))))).....))))).))))))))..)))))))).)))))...	88	34	-35.9	1.1	29	29	30	44	46	31	34.0099	27.2213	34.2415	44.745	46.8787	30.0171	middle
2	3	gma-miR156c_R+1_1ss17AG	TTGACAGAAGATAGAGGGCACA	22	chr6.1	-	72480850	72480990	ctagttaagtaaggttgTTGACAGAAGATAGAGGGCACTaaggatgatatgcatacacatatacaacatggaggaagagcttaattgcatttcatttcctttgtGCCCTCTAGACTTCTGTCATCacctcatctttaccct	3	gma-MIR156i,gma-MIR156d,cme-MIR156e,	gma-MIR156d	ctacttggtaattaaggttgTTGACAGAAGATAGAGAGCACagatgatgatatgcatattatataatatatagcagggaactcatgatgaattgtgcatcttactcctttgtgctctctatacttctgtcatcaccttcagcctccatttc	gma-miR156c	TTGACAGAAGATAGAGAGCAC	5'	Diff	gp2a	...((.(((..(((.((.(((((((((.((((((((((.((((((((.(((((.................(((......)))...))))).)))..))))).))))))))))..))))))))).)))))...))).))...	135	39.7	-52.7	0.9	0	0	5	0	3	0	0	0	5.70692	0	3.05731	0	low
2	4	gma-MIR156i-p3_1ss3TC	GCCCTCTATACTTCTGTCATC	21	chr6.1	-	72480850	72480990	ctagttaagtaaggttgTTGACAGAAGATAGAGGGCACTaaggatgatatgcatacacatatacaacatggaggaagagcttaattgcatttcatttcctttgtGCCCTCTAGACTTCTGTCATCacctcatctttaccct	3	gma-MIR156i,gma-MIR156d,cme-MIR156e,	gma-MIR156i	ttaaggttgTTGACAGAAGATAGAGAGCACagatgatgatatgcatattatataaaaagcagctagggaactcatgaattgtgcatctcactcctttgtgctctctatacttctgtcatcacccttcagc	gma-MIR156i-p3	gctctctatacttctgtcatc	3'	New	gp2a	...((.(((..(((.((.(((((((((.((((((((((.((((((((.(((((.................(((......)))...))))).)))..))))).))))))))))..))))))))).)))))...))).))...	135	39.7	-52.7	0.9	106	0	77	48.5	38.5	75.5	124.312	0	87.8866	49.3211	39.2354	73.1061	middle
3	3	gma-miR156c_R+1_1ss17AG	TTGACAGAAGATAGAGGGCACA	22	chr6.2	-	80107587	80107727	ctagttaagtaaggttgTTGACAGAAGATAGAGGGCACTaaggatgatatgcatacacatatacaacatggaggaagagcttaattgcatttcatttcctttgtGCCCTCTAGACTTCTGTCATCAcctcatctttaccct	3	gma-MIR156d,gma-MIR156i,cme-MIR156e,	gma-MIR156i	ttaaggttgTTGACAGAAGATAGAGAGCACagatgatgatatgcatattatataaaaagcagctagggaactcatgaattgtgcatctcactcctttgtgctctctatacttctgtcatcacccttcagc	gma-miR156c	TTGACAGAAGATAGAGAGCAC	5'	Diff	gp2a	...((.(((..(((.((.(((((((((.((((((((((.((((((((.(((((.................(((......)))...))))).)))..))))).))))))))))..))))))))).)))))...))).))...	135	39.7	-52.7	0.9	0	0	5	0	3	0	0	0	5.70692	0	3.05731	0	low
3	5	gma-MIR156d-p3_1ss3TC_2	GCCCTCTATACTTCTGTCATCA	22	chr6.2	-	80107587	80107727	ctagttaagtaaggttgTTGACAGAAGATAGAGGGCACTaaggatgatatgcatacacatatacaacatggaggaagagcttaattgcatttcatttcctttgtGCCCTCTAGACTTCTGTCATCAcctcatctttaccct	3	gma-MIR156d,gma-MIR156i,cme-MIR156e,	gma-MIR156d	ctacttggtaattaaggttgTTGACAGAAGATAGAGAGCACagatgatgatatgcatattatataatatatagcagggaactcatgatgaattgtgcatcttactcctttgtgctctctatacttctgtcatcaccttcagcctccatttc	gma-MIR156d-p3	gctctctatacttctgtcatca	3'	New	gp2a	...((.(((..(((.((.(((((((((.((((((((((.((((((((.(((((.................(((......)))...))))).)))..))))).))))))))))..))))))))).)))))...))).))...	135	39.7	-52.7	0.9	3	0	3	0	0	5.5	3.51827	0	3.42415	0	0	5.32561	middle
4	6	cas-miR156k-3p_R+1	TGCTTACTCTCTATCTGTCACCT	23	chr3.1	+	82539082	82539183	aagggtggtgacagaagagagtgagcacacatggtgttttcttgcacgatgttgtttcatgcttgaagctatatgTGCTTACTCTCTATCTGTCACCCcacc	1	cas-MIR156k,	cas-MIR156k	ttgatggTGACAGAAGAGAGTGAGCACaaatggtgactttcttgcataaggtttcatgctggaagctatgtgTGCTTACTCTCTATCTGTCACCtctttct	cas-miR156k-3p	TGCTTACTCTCTATCTGTCACC	3'	Diff	gp2a	...((.((((((((((((((((((((((((((.((((......)))).)))..((((((....))))))....)))))))))))))).)))))))))))...	96	46.1	-55.3	1.2	0	0	2.5	3	10	0	0	0	2.85346	3.05079	10.191	0	middle
5	6	cas-miR156k-3p_R+1	TGCTTACTCTCTATCTGTCACCT	23	chr3.2	+	86476498	86476599	aagggtggtgacagaagagagtgagcacacatggtgttttcttgcacgatgttgtttcatgcttgaagctatatgTGCTTACTCTCTATCTGTCACCCcacc	1	cas-MIR156k,	cas-MIR156k	ttgatggTGACAGAAGAGAGTGAGCACaaatggtgactttcttgcataaggtttcatgctggaagctatgtgTGCTTACTCTCTATCTGTCACCtctttct	cas-miR156k-3p	TGCTTACTCTCTATCTGTCACC	3'	Diff	gp2a	...((.((((((((((((((((((((((((((.((((......)))).)))..((((((....))))))....)))))))))))))).)))))))))))...	96	46.1	-55.3	1.2	0	0	2.5	3	10	0	0	0	2.85346	3.05079	10.191	0	middle
6	7	gma-miR156a_1ss20CT	TGACAGAAGAGAGTGAGCAT	20	chr3.1	-	84132787	84132872	aaatTGACAGAAGAGAGTGAGCACacagagacatttatatagatgtatctttgcatttgtgtgctcactcatctttctgtcaaatt	50	gma-MIR156u,gma-MIR156a,ptc-MIR156a,ptc-MIR156c,ptc-MIR156f,ptc-MIR156e,ath-MIR156c,bra-MIR156c,ath-MIR156a,ath-MIR156b,ath-MIR156g,mdm-MIR156d,mdm-MIR156l,mdm-MIR156ae,mdm-MIR156ad,stu-MIR156f,aly-MIR156b,aly-MIR156a,aly-MIR156c,aly-MIR156g,ppe-MIR156c,mes-MIR156f,mes-MIR156b,vvi-MIR156d,vvi-MIR156b,vvi-MIR156e,nta-MIR156c,nta-MIR156b,csi-MIR156a,lus-MIR156a,cme-MIR156i,cme-MIR156d,fve-MIR156h,b…	gma-MIR156a	cacaccagattgagagaggcTGACAGAAGAGAGTGAGCACatgctagtggtatttgtatgagggcatacaattgcgggtgcgtgctcacttctctatctgtcagcttcccattcttttttac	gma-miR156a	TGACAGAAGAGAGTGAGCAC	5'	Diff	gp2a	...((((((((((((((((((((((((((..((...((((....))))...))..))))))))))))))).)))).)))))))...	80	34.9	-41.2	1.4	142	170.5	128.5	86.5	217	90.5	166.531	160.043	146.668	87.9645	221.145	87.6305	middle
7	7	gma-miR156a_1ss20CT	TGACAGAAGAGAGTGAGCAT	20	chr3.4	-	92521964	92522049	aaatTGACAGAAGAGAGTGAGCACacagagacatttatatagatgtatctttgcatttgtgtgctcactcatctttctgtcaaatt	50	gma-MIR156u,gma-MIR156a,ptc-MIR156a,ptc-MIR156c,ptc-MIR156f,ptc-MIR156e,ath-MIR156c,bra-MIR156c,ath-MIR156a,ath-MIR156b,mdm-MIR156d,mdm-MIR156l,mdm-MIR156ae,mdm-MIR156ad,stu-MIR156f,aly-MIR156b,aly-MIR156a,aly-MIR156c,ppe-MIR156c,mes-MIR156f,mes-MIR156b,vvi-MIR156d,vvi-MIR156b,vvi-MIR156e,nta-MIR156c,nta-MIR156b,csi-MIR156a,lus-MIR156a,lus-MIR156g,cme-MIR156d,cme-MIR156i,fve-MIR156h,sly-MIR156e,b…	gma-MIR156a	cacaccagattgagagaggcTGACAGAAGAGAGTGAGCACatgctagtggtatttgtatgagggcatacaattgcgggtgcgtgctcacttctctatctgtcagcttcccattcttttttac	gma-miR156a	TGACAGAAGAGAGTGAGCAC	5'	Diff	gp2a	...((((((((((((((((((((((((((..((...((((....))))...))..))))))))))))))).)))).)))))))...	80	34.9	-41.2	1.4	142	170.5	128.5	86.5	217	90.5	166.531	160.043	146.668	87.9645	221.145	87.6305	middle
8	8	cas-miR156k-3p_L-1R+1	GCTTACTCTCTATCTGTCACCT	22	chr3.3	+	86069196	86069309	aagggtaagggtggtgacagaagagagtgagcacacatggtgttttcttgcacgatgttgttccatgcttgaagctatatgtGCTTACTCTCTATCTGTCACCCcaccaccatc	1	cas-MIR156k,	cas-MIR156k	ttgatggTGACAGAAGAGAGTGAGCACaaatggtgactttcttgcataaggtttcatgctggaagctatgtgTGCTTACTCTCTATCTGTCACCtctttct	cas-miR156k-3p	TGCTTACTCTCTATCTGTCACC	3'	Diff	gp2a	...(((...((.(((((((((((((((((((((((.(((((...(((..(((.((......))..)))..)))))))).)))))))))))))).)))))))))))...)))...	108	47.4	-56.9	1.1	30.5	58.5	37	48	171.5	104.5	35.7691	54.912	42.2312	48.8127	174.776	101.187	middle
9	8	cas-miR156k-3p_L-1R+1	GCTTACTCTCTATCTGTCACCT	22	chr3.4	+	91668615	91668728	aagggtaagggtggtgacagaagagagtgagcacacatggtgttttcttgcacgatgttgtttcatgcttgaagctatatgtGCTTACTCTCTATCTGTCACCCcaccaccatc	1	cas-MIR156k,	cas-MIR156k	ttgatggTGACAGAAGAGAGTGAGCACaaatggtgactttcttgcataaggtttcatgctggaagctatgtgTGCTTACTCTCTATCTGTCACCtctttct	cas-miR156k-3p	TGCTTACTCTCTATCTGTCACC	3'	Diff	gp2a	...(((...((.((((((((((((((((((((((((((.((((......)))).)))..((((((....))))))....)))))))))))))).)))))))))))...)))...	108	46.5	-59.2	1.1	30.5	58.5	37	48	171.5	104.5	35.7691	54.912	42.2312	48.8127	174.776	101.187	middle
10	9	gma-MIR156d-p3_1ss3TC_1	GCCCTCTATACTTCTGTCATC	21	chr6.4	-	55126483	55126623	ctagttaagtaaggttgttgacagaagatagagggcactaaggatgatatgcatacacatatacaacatggaggaagagcttaattgcatttcatttcctttgtGCCCTCTAGACTTCTGTCATCacctcatctttaccct	3	gma-MIR156d,gma-MIR156i,cme-MIR156e,	gma-MIR156d	ctacttggtaattaaggttgTTGACAGAAGATAGAGAGCACagatgatgatatgcatattatataatatatagcagggaactcatgatgaattgtgcatcttactcctttgtgctctctatacttctgtcatcaccttcagcctccatttc	gma-MIR156d-p3	gctctctatacttctgtcatc	3'	New	gp2a	...((.(((..(((.((.(((((((((.((((((((((.((((((((.(((((.................(((......)))...))))).)))..))))).))))))))))..))))))))).)))))...))).))...	135	39.7	-52.7	0.9	106	0	77	48.5	38.5	75.5	124.312	0	87.8866	49.3211	39.2354	73.1061	middle
11	10	ptc-miR160a_R+1	TGCCTGGCTCCCTGTATGCCAC	22	chr1.1	-	68790013	68790104	tgtatgTGCCTGGCTCCCTGTATGCCATatacgaagctggttgaaaaatcaacgacctttgtagatggcgtatgaggagccaagcatattcc	25	ptc-MIR160a,ptc-MIR160d,ath-MIR160b,ath-MIR160c,mdm-MIR160b,mdm-MIR160d,mdm-MIR160a,stu-MIR160b,aly-MIR160c,aly-MIR160b,ppe-MIR160a,mes-MIR160b,mes-MIR160a,vvi-MIR160c,nta-MIR160c,lus-MIR160h,lus-MIR160i,fve-MIR160a,bna-MIR160b,bna-MIR160c,bna-MIR160d,cas-MIR160b,cpa-MIR160b,cpa-MIR160e,rco-MIR160b,	ptc-MIR160d	aaatgggttaTGCCTGGCTCCCTGTATGCCAcagcaaagaccaatctcttctgtcttagattggctgctgccggtggcgtgcgaggagccaagcatactctct	ptc-miR160a	TGCCTGGCTCCCTGTATGCCA	5'	Diff	gp2a	...((((((.(((((((..(((((((((.(((((((...(((((....)))))...))))))).)))))))))..))))))).))))))...	86	46.7	-47.3	1.1	0	0	0	3	11	11.5	0	0	0	3.05079	11.2101	11.1354	middle
12	10	ptc-miR160a_R+1	TGCCTGGCTCCCTGTATGCCAC	22	chr1.3	-	66391550	66391641	tgtatgTGCCTGGCTCCCTGTATGCCATatacgaagctggttgaaaaatcaacgacctttgtggatggcgtatgaggagccaagcatattcc	25	ptc-MIR160a,ptc-MIR160d,ath-MIR160b,ath-MIR160c,mdm-MIR160b,mdm-MIR160d,mdm-MIR160a,stu-MIR160b,aly-MIR160c,aly-MIR160b,ppe-MIR160a,mes-MIR160b,mes-MIR160a,vvi-MIR160c,nta-MIR160c,lus-MIR160h,lus-MIR160i,fve-MIR160a,bna-MIR160d,bna-MIR160b,bna-MIR160c,cas-MIR160b,cpa-MIR160b,cpa-MIR160e,rco-MIR160b,	ptc-MIR160d	aaatgggttaTGCCTGGCTCCCTGTATGCCAcagcaaagaccaatctcttctgtcttagattggctgctgccggtggcgtgcgaggagccaagcatactctct	ptc-miR160a	TGCCTGGCTCCCTGTATGCCA	5'	Diff	gp2a	...((((((.(((((((..(((((((((..((((((...(((((....)))))...))))))..)))))))))..))))))).))))))...	86	47.8	-45.7	1	0	0	0	3	11	11.5	0	0	0	3.05079	11.2101	11.1354	middle
13	11	mes-miR160a_1ss21AT	TGCCTGGCTCCCTGTATGCCT	21	chr1.2	-	49746101	49746235	tatgatgtagatatatatatactaattacgTGCCTGGCTCCCTGTATGCCAtttgtagagttcatcaagatgttgatgactttaatgaatggcgtgcgaggagccatgcatgttgtgtatattttctatatttta	7	mes-MIR160g,lus-MIR160j,lus-MIR160a,bra-MIR160a,bna-MIR160a,cpa-MIR160a,htu-MIR160a,	mes-MIR160g	gtgTGCCTGGCTCCCTGTATGCCAtctgcaaagctcatcagaaagtcggtggcctccgcagatggcatgcgaggagccatgcatgc	mes-miR160a	TGCCTGGCTCCCTGTATGCCA	5'	Diff	gp2a	...((((((((...((((((((.....((((((.(((((((..((((((((((..((((((.((((((....))))))))))).)..))))))))))..))))))).)))))).))))))))..))))))))...	129	35.6	-64.1	1.3	5	8.5	3.5	11	8	7.5	5.86378	7.97867	3.99484	11.1862	8.15282	7.26219	middle
14	11	mes-miR160a_1ss21AT	TGCCTGGCTCCCTGTATGCCT	21	chr7.1	-	8552292	8552446	ttacatttaatttggtttttgtctgctatcatgcttggtaTGCCTGGCTCCCTGTATGCCAtttgtagagtccatcacgacagtgatgaacttagtgaatggcgtactcggagtcatgcatgctgtgaaatagaaaaagctgaagtggtttggtt	7	mes-MIR160g,lus-MIR160j,lus-MIR160a,bra-MIR160a,bna-MIR160a,cpa-MIR160a,htu-MIR160a,	mes-MIR160g	gtgTGCCTGGCTCCCTGTATGCCAtctgcaaagctcatcagaaagtcggtggcctccgcagatggcatgcgaggagccatgcatgc	mes-miR160a	TGCCTGGCTCCCTGTATGCCA	5'	Diff	gp2a	...((.....((..((((((.((((...((((....(((((((.(((((((..((((((((((..(..(((.((((((....)))))).)))..)..))))))))))..))))))).)))))))))))..))))))))))..))......))...	149	41.9	-64.1	1	5	8.5	3.5	11	8	7.5	5.86378	7.97867	3.99484	11.1862	8.15282	7.26219	middle
15	12	ptc-miR162a_R+1	TCGATAAACCTCTGCATCCAGT	22	chr8.1	+	14762814	14763015	aaattgattgatggtgtagaatagaatagaatagagataaggcgaagttcgtcactggatgcagcggttcatcgatctgttcctgaattttgtttgtctcgcaaaacaaacatgaatcggTCGATAAACCTCTGCATCCAGCgctcacttttccctctcttcgttgtcttttctttttatttatttttcgttttgatttgtt	5	ptc-MIR162b,bra-MIR162,cas-MIR162a,htu-MIR162a,hpe-MIR162a,	ptc-MIR162b	tgagaagacactggaggcagcggttcatcgatcttttcctgaagatttttttgttttacacgaacaacacgaaccgaTCGATAAACCTCTGCATCCAGtgcttccct	ptc-miR162a	TCGATAAACCTCTGCATCCAG	3'	Diff	gp2a	((((..(.(((....((((((.((((.(((..(((((...((..((((..((..((((((((((.((((.(((((((..(((.((...(((((((........))))))))).)))..))))))).)))).)))))))))).))..))))..)).)))))......))).)))))))))).......)))..)..))))...	199	37.6	-61.7	0.8	45.5	30.5	34.5	37.5	57.5	42.5	53.3604	28.6293	39.3778	38.1349	58.5984	41.1524	middle
16	12	ptc-miR162a_R+1	TCGATAAACCTCTGCATCCAGT	22	chr8.1	-	15470110	15470302	aattgattgatggtgtagaatagaatagaatagagataaggcgaagttcgtcactggatgcagcggttcatcgatctgttcctgaattttgtttgtctcgcaaaacaaacatgaatcgggTCGATAAACCTCTGCATCCAGCgctcacttttccctctcttcgttgtcttttctttttatttatttttcgttt	6	ptc-MIR162b,bra-MIR162,cas-MIR162a,htu-MIR162a,hpe-MIR162a,tcc-MIR162,	ptc-MIR162b	tgagaagacactggaggcagcggttcatcgatcttttcctgaagatttttttgttttacacgaacaacacgaaccgaTCGATAAACCTCTGCATCCAGtgcttccct	ptc-miR162a	TCGATAAACCTCTGCATCCAG	3'	Diff	gp2a	...(((..(((...((((((.((((.(((..(((((...((..((((..((..((((((((((.((((.((((((((((((.((...(((((((........))))))))).))).))))))))).)))).)))))))))).))..))))..)).)))))......))).))))))))))..)))..)))...	187	38.9	-64	0.9	45.5	30.5	34.5	37.5	57.5	42.5	53.3604	28.6293	39.3778	38.1349	58.5984	41.1524	middle
[truncated: 1,970 more rows]
