# Supplementary material for: Integrated agronomic, physiological, microstructure, and whole-transcriptome analyses reveal the role of biomass accumulation and quality formation during Se biofortification in alfalfa
Source: Front Plant Sci. 2023 Jul 20;14:1198847. doi: 10.3389/fpls.2023.1198847 (PMC10400095; doi:10.3389/fpls.2023.1198847)
Supplement: Supplementary Table S3 — List of 62 DEmiRNAs in alfalfa under Se biofortification. [file Table_3.xlsx]

## Sheet: Sheet1
red is pvalue<0.001,orange is pvalue <0.01,blue is pvalue<0.05,green is pvalue <0.1.
Index	miR_name		miR_seq	up/down	fold_change(Low_Se(mean)/CK(mean))	log2(fold_change)	pvalue(t_test)	CK(mean)	Low_Se(mean)	CK/CK1(norm)	CK/CK2(norm)	CK/CK3(norm)	Low_Se/Low_Se1(norm)	Low_Se/Low_Se2(norm)	Low_Se/Low_Se3(norm)	CK/CK1(raw)	CK/CK2(raw)	CK/CK3(raw)	Low_Se/Low_Se1(raw)	Low_Se/Low_Se2(raw)	Low_Se/Low_Se3(raw)	Expression level
1	mtr-MIR2678-p5	gp1	CAGAAGGATCAACATCATAGA	down	0.283159	-1.82032	0.000318749	79.7902	22.5933	72.7109	84.48	82.1797	21.3555	18.3438	28.0805	62	90	72	21	18	29	middle
2	mtr-MIR2678-p3_1ss20CT	gp1	TTGCTCGAAGAAGCTCAGGTC	down	0.373698	-1.42005	0.000343012	387.925	144.967	403.428	400.811	359.536	154.573	126.369	153.959	344	427	315	152	124	159	middle
3	mtr-MIR5563-p3_1ss5GA	gp2a	TAACAGAAGGACTGAGTTGCC	up	1.72464	0.786292	0.000623495	32.9511	56.8287	35.1827	32.8534	30.8174	56.4397	54.0124	60.0341	30	35	27	55.5	53	62	middle
4	mtr-miR5232	gp2a	TACATGTCGCTCTCACCTGAA	down	0.467857	-1.09586	0.000772458	300.581	140.629	300.226	285.355	316.163	162.709	119.744	139.434	256	304	277	160	117.5	144	middle
5	mtr-MIR5267c-p3_2ss14AT17AG	gp1	ATTTTTTAGAAGGTGTGTTTTAGC	down	0.52021	-0.942834	0.00259249	12.1723	6.33214	12.9003	12.2027	11.4138	5.08465	7.13371	6.77805	11	13	10	5	7	7	middle
6	PC-3p-42904_120	gp4	TATCGGCAAATTTTCCTTGGGA	down	0.0684862	-3.86804	0.00316013	53.0777	3.63509	46.9103	50.688	61.6347	0	5.09551	5.80976	40	54	54	0	5	6	middle
7	gma-miR1514a-3p_L-1R+1_1ss13AG	gp2a	TGCCTATTTTAGAATGAAAAC	up	inf	inf	0.00528392	0	2.67345	0	0	0	2.54233	3.05731	2.42073	0	0	0	2.5	3	2.5	low
8	PC-5p-207897_16	gp4	TCTATCAGAAGAGAATGTTAC	down	-inf	-inf	0.0091234	5.1193	0	4.69103	6.10134	4.56554	0	0	0	4	6.5	4	0	0	0	low
9	PC-3p-27246_185	gp4	TGAATCTGTTTAATCACCTCC	up	4.77867	2.25661	0.00989715	4.02622	19.2399	3.51827	0	8.56038	18.8132	22.9298	15.9768	3	0	7.5	18.5	22.5	16.5	middle
10	mtr-miR1509b	gp1	TTAATCTAGGAAATTACACTCG	down	0.744402	-0.425846	0.0107713	1160.01	863.511	1094.18	1161.13	1224.71	769.817	880.504	940.212	933	1237	1073	757	864	971	high
11	gma-miR172h-5p_R-1	gp2a	GCAGCAGCATCAAGATTCAC	up	2.2536	1.17223	0.0110448	67.7632	152.711	93.2341	63.8294	46.2261	145.421	144.712	167.999	79.5	68	40.5	143	142	173.5	middle
12	gma-miR9749_L+1R-1	gp3	TTTAGCTTCTTTCACCTTTCC	up	1.41406	0.499845	0.0114682	1130.77	1598.98	1171.58	1016.58	1204.16	1698.27	1439.99	1658.69	999	1083	1055	1670	1413	1713	high
13	PC-5p-12132_391	gp4	AGGGATTTGGGTGAGGGACA	down	0.591008	-0.75875	0.0134902	45.0586	26.63	42.2192	47.872	45.0847	29.491	20.382	30.0171	36	51	39.5	29	20	31	middle
14	PC-5p-27429_184	gp4	GTCAAGCATCATAGAATTTATAGG	down	0.237703	-2.07277	0.0136826	41.4073	9.84263	30.4917	46.9334	46.7968	12.2032	17.3247	0	26	50	41	12	17	0	middle
15	gma-miR4416c-5p_L-1R+1_1ss2TC	gp2a	CGGGTGAGAGAAACACGTATC	down	0.384933	-1.37732	0.0151154	38.9187	14.9811	39.2873	32.384	45.0847	12.7116	15.2865	16.9451	33.5	34.5	39.5	12.5	15	17.5	middle
16	mtr-MIR2670d-p3_1ss6GA	gp2b	TTCGGAGTAAAATAGTGAGTAGCC	up	inf	inf	0.015681	0	2.84258	0	0	0	3.55926	2.54776	2.42073	0	0	0	3.5	2.5	2.5	low
17	PC-3p-130383_34	gp4	TACTATAACTACTGCACGAGC	down	-inf	-inf	0.016052	4.1754	0	4.10465	3.28534	5.13623	0	0	0	3.5	3.5	4.5	0	0	0	low
18	PC-3p-74747_68	gp4	TAACTACCCCCATTATCCATC	up	4.00069	2.00025	0.0165231	3.83193	15.3304	5.86378	5.632	0	11.1862	18.3438	16.461	5	6	0	11	18	17	middle
19	mtr-MIR169h-p3	gp1	GGCAGTTGTCATTGGTTCATG	down	0.161197	-2.6331	0.0186783	49.9014	8.04396	53.9468	37.5467	58.2106	10.1693	8.15282	5.80976	46	40	51	10	8	6	middle
20	mtr-miR156g-3p_1ss3TC	gp1	GCCCTCTAGACTTCTGTCATC	down	0.670603	-0.576469	0.0201821	486.602	326.317	540.641	474.027	445.14	263.385	349.552	366.015	461	505	390	259	343	378	middle
21	PC-5p-193590_18	gp4	ATGGGGAGTTAGTTTTGACAAAGC	up	inf	inf	0.0212585	0	2.98775	0	0	0	2.54233	2.54776	3.87317	0	0	0	2.5	2.5	4	low
22	PC-3p-60657_85	gp4	ATTGGAGGCTCATTACTT	up	6.13064	2.61604	0.0230909	2.15005	13.1812	6.45016	0	0	11.6947	14.777	13.072	5.5	0	0	11.5	14.5	13.5	middle
23	PC-3p-3035_1251	gp4	TACTATAGATGTGGTGCTGCAGAT	down	0.447529	-1.15995	0.0237836	138.162	61.8317	117.276	159.104	138.107	45.7619	44.8405	94.8927	100	169.5	121	45	44	98	middle
24	PC-3p-58380_88	gp4	TCCCCAGGACTGATCACTATT	down	0.28674	-1.80218	0.023924	16.1546	4.63219	12.9003	15.0187	20.5449	7.11852	0	6.77805	11	16	18	7	0	7	middle
25	ath-miR8175_L+4_1ss6AT	gp2b	GTTCGTTCCCCGGCAACGGCGCCA	down	0.257335	-1.95828	0.0241134	10.5479	2.71435	9.96843	7.97867	13.6966	4.57619	3.56686	0	8.5	8.5	12	4.5	3.5	0	middle
26	gra-MIR8782-p3_2ss13TC17CT	gp2b	TAGTAGTTTTCTCTTGTT	up	inf	inf	0.0253222	0	3.6657	0	0	0	4.57619	2.54776	3.87317	0	0	0	4.5	2.5	4	low
27	mtr-MIR5258-p3_1ss11AG	gp1	TCCATATGTCGCTATTCAGAA	down	0.499153	-1.00244	0.0263017	27.3778	13.6657	24.6279	24.4053	33.1001	11.1862	15.2865	14.5244	21	26	29	11	15	15	middle
28	PC-3p-75449_67	gp4	TTTGCTCTTTTCACTCTCATG	down	-inf	-inf	0.0264779	8.15012	0	7.03654	6.57067	10.8431	0	0	0	6	7	9.5	0	0	0	middle
29	gma-miR159d_L+1R-1	gp2b	GAGCTGCTTAGCTATGGATCC	down	-inf	-inf	0.0296806	3.83957	0	2.93189	5.16267	3.42415	0	0	0	2.5	5.5	3	0	0	0	low
30	gma-miR4416c-5p_R+1_1ss2TC	gp2a	CCGGGTGAGAGAAACACGTATC	down	0.362597	-1.46356	0.0301159	86.4459	31.3451	76.8155	71.808	110.714	27.9656	23.9489	42.1207	65.5	76.5	97	27.5	23.5	43.5	middle
31	mtr-miR5213-3p_1ss8CT	gp1	CAGAGTGTAGATACACGCATC	down	0.783026	-0.352868	0.0302013	1517.83	1188.5	1544.52	1409.88	1599.08	1254.89	1034.39	1276.21	1317	1502	1401	1234	1015	1318	high
32	PC-5p-150639_27	gp4	ACCTTCCAACCCTGAACGTCACAC	down	-inf	-inf	0.030797	3.8235	0	3.51827	2.816	5.13623	0	0	0	3	3	4.5	0	0	0	low
33	PC-5p-163495_24	gp4	ATGAGATTGTGAGGATCAAGA	down	-inf	-inf	0.0312186	4.40988	0	5.2774	2.816	5.13623	0	0	0	4.5	3	4.5	0	0	0	low
34	mtr-miR2111a-5p	gp1	TAATCTGCATCCTGAGGTTTA	up	4.70662	2.23469	0.0314069	2.97872	14.0197	1.46595	7.47023	0	18.5929	9.99084	13.4754	1.25	7.95833	0	18.2833	9.80357	13.9167	middle
35	gma-miR171c-3p	gp1	TTGAGCCGTGCCAATATCACA	down	0.612068	-0.708235	0.0325684	302.994	185.453	332.454	249.811	326.716	192.946	138.879	224.533	283.481	266.133	286.245	189.733	136.276	231.886	middle
36	mtr-miR166d_1ss17CT	gp1	TCGGGCCAGGCTTCATTCCCC	up	1.3007	0.379287	0.0326232	12.8379	16.6982	14.0731	11.0293	13.4113	16.2709	18.0891	15.7348	12	11.75	11.75	16	17.75	16.25	middle
37	mtr-miR396a-5p	gp1	TTCCACAGCTTTCTTGAACTT	down	0.71972	-0.474493	0.0338338	21788.4	15681.6	23368.9	22711.5	19284.8	16958.3	17266.1	12820.2	19926.5	24195.5	16896	16676	16942.5	13240	high
38	PC-3p-161052_25	gp4	AGTGTATTAATTGGACCCCACACC	up	inf	inf	0.0339709	0	4.82817	0	0	0	6.10158	3.05731	5.32561	0	0	0	6	3	5.5	low
39	PC-3p-42756_120	gp4	TACATGAACTTCATGCATTTG	up	1.57891	0.658933	0.0346619	4.65519	7.35016	5.2774	4.69334	3.99484	6.61005	8.66237	6.77805	4.5	5	3.5	6.5	8.5	7	low
40	PC-3p-72433_70	gp4	TGATGGTTCTCATTCAGTAGA	up	inf	inf	0.0349813	0	5.33699	0	0	0	7.11852	3.56686	5.32561	0	0	0	7	3.5	5.5	low
41	mtr-MIR5239-p3_2ss19CA20AC	gp1	CGTTCTATATTTTCTCCCACC	up	2.41276	1.27068	0.035734	157.649	380.37	189.987	122.027	160.935	403.722	282.291	455.098	162	130	141	397	277	470	middle
42	mdm-miR482b_R-1_2ss11CG20TG	gp2b	TCTTTCCTATGCCTCCCATGC	up	5.12354	2.35714	0.035828	1.33161	6.82258	0	0	3.99484	8.13545	4.58596	7.74634	0	0	3.5	8	4.5	8	low
43	PC-5p-37318_137	gp4	TGTAGGGGGTTTTAAAGCTGAA	down	0.385803	-1.37406	0.0378154	11.2396	4.33628	8.79567	14.08	10.8431	5.08465	3.56686	4.35732	7.5	15	9.5	5	3.5	4.5	middle
44	PC-3p-8299_547	gp4	CGTACAACCCGACAAACTCCACCC	up	2.40781	1.26772	0.0379456	40.3484	97.1512	56.8787	38.4854	25.6811	96.6084	72.3562	122.489	48.5	41	22.5	95	71	126.5	middle
45	mtr-miR396a-3p	gp1	GCTCAAGAAAGCTGTGGGAGA	up	1.66644	0.73677	0.039423	7399.1	12330.2	9426.62	6956.46	5814.21	10379.8	14586.4	12024.3	8038	7411	5094	10207	14313	12418	high
46	PC-5p-149354_28	gp4	ACGGTCCAAAACAATTTTGCACAT	down	-inf	-inf	0.0405594	3.99602	0	2.93189	5.632	3.42415	0	0	0	2.5	6	3	0	0	0	low
47	PC-5p-75137_67	gp4	ATTTTTGCTCACAAGTACCGC	up	4.81919	2.26879	0.0407491	1.14138	5.50055	0	0	3.42415	4.06772	6.62416	5.80976	0	0	3	4	6.5	6	low
48	PC-5p-90396_54	gp4	AAATAGACCTTCAAGAATCAGTTA	down	0.208706	-2.26046	0.0415607	6.95926	1.45244	5.2774	7.04	8.56038	0	0	4.35732	4.5	7.5	7.5	0	0	4.5	low
49	mtr-MIR2592u-p3_2ss13GT21CG	gp1	CCATCATCTAAATCAAGCCTGA	down	0.354547	-1.49595	0.0441517	39.9588	14.1673	41.1931	27.4638	51.2196	14.6184	20.4232	7.46025	35.125	29.2583	44.875	14.375	20.0404	7.70455	middle
50	mtr-MIR2592at-p3_2ss13GT21AG	gp1	CCATCATCTAAATCAAGCCTGA	down	0.354547	-1.49595	0.0441517	39.9588	14.1673	41.1931	27.4638	51.2196	14.6184	20.4232	7.46025	35.125	29.2583	44.875	14.375	20.0404	7.70455	middle
51	mtr-MIR2592d-p3_2ss13GT21CG	gp1	CCATCATCTAAATCAAGCCTGA	down	0.354547	-1.49595	0.0441517	39.9588	14.1673	41.1931	27.4638	51.2196	14.6184	20.4232	7.46025	35.125	29.2583	44.875	14.375	20.0404	7.70455	middle
52	mtr-MIR2592au-p3_2ss13GT21AG	gp1	CCATCATCTAAATCAAGCCTGA	down	0.354547	-1.49595	0.0441517	39.9588	14.1673	41.1931	27.4638	51.2196	14.6184	20.4232	7.46025	35.125	29.2583	44.875	14.375	20.0404	7.70455	middle
53	mdm-miR172a_R+3	gp2a	AGAATCTTGATGATGCTGCATCT	up	5.11018	2.35337	0.0449916	0.782223	3.9973	0	2.34667	0	4.06772	3.56686	4.35732	0	2.5	0	4	3.5	4.5	low
54	mtr-miR172c-5p	gp1	GTAGCATCATCAAGATTCACA	up	2.49939	1.32158	0.0454096	63.4328	158.543	59.2242	85.4187	45.6554	173.387	109.553	192.69	50.5	91	40	170.5	107.5	199	middle
55	PC-3p-83789_59	gp4	ATGGTCCTTAAAGAGTGCCCCGGG	up	4.74996	2.24792	0.0464912	2.19022	10.4035	0	6.57067	0	12.2032	12.2292	6.77805	0	7	0	12	12	7	middle
56	PC-3p-121614_37	gp4	AATACGTGAAGAGTTAAAGAGAAT	down	-inf	-inf	0.0468415	4.68937	0	2.93189	6.57067	4.56554	0	0	0	2.5	7	4	0	0	0	low
57	mtr-MIR1510b-p5_2ss18CT19CT	gp2b	TCCCTACCATGTGGACTTT	up	4.76009	2.25099	0.0469224	0.977297	4.65202	2.93189	0	0	3.05079	5.09551	5.80976	2.5	0	0	3	5	6	middle
58	PC-5p-96769_50	gp4	GTTGTGTTTCCATCAAGGCTCGCC	up	5.10717	2.35252	0.0471252	1.14138	5.82925	0	0	3.42415	7.62698	3.56686	6.2939	0	0	3	7.5	3.5	6.5	low
59	mtr-miR169h	gp1	TGAGCCAAAGATGACTTGCCGG	down	0.221188	-2.17665	0.0477937	127.798	28.2673	143.076	81.664	158.652	20.3386	30.5731	33.8902	122	87	139	20	30	35	middle
60	PC-5p-124278_36	gp4	TTAATCGGGAACCAAAGGTTT	up	inf	inf	0.0480628	0	3.85358	0	0	0	3.05079	5.60506	2.90488	0	0	0	3	5.5	3	low
61	PC-3p-48476_106	gp4	TATCATGAAAAGCGATCCCAC	down	0.0941443	-3.40898	0.0491017	36.0061	3.38977	51.6013	34.7307	21.6863	10.1693	0	0	44	37	19	10	0	0	middle
62	lja-MIR171c-p3_2ss1AT17TG	gp2b	TTGTTGATCTGGCTCAGATTT	up	inf	inf	0.0495269	0	3.97262	0	0	0	3.05079	3.05731	5.80976	0	0	0	3	3	6	low
63	mtr-miR5272a_L+2R-2		GAGAATTGATTTATGTTTGGATAC	up	1.9961	0.997183	0.051082	7.77811	15.5259	4.10465	11.6395	7.5902	13.3218	16.4075	16.8483	3.5	12.4	6.65	13.1	16.1	17.4	middle
64	mtr-miR5558-3p_L+3_1ss17AG		AGATAGATTTAGAATTGGAAAAGC	up	1.50425	0.589041	0.0511878	15.6499	23.5413	11.7276	19.2427	15.9794	25.4233	22.9298	22.2707	10	20.5	14	25	22.5	23	middle
65	ath-miR8175_L+3_1ss5AT		TTCGTTCCCCGGCAACGGCGCCA	down	0.430408	-1.21622	0.0515899	8.93196	3.84439	9.38205	6.57067	10.8431	4.06772	4.07641	3.38902	8	7	9.5	4	4	3.5	middle
66	mtr-MIR5237-p3		TGGAGAGATTAAAAAGATTGT	down	-inf	-inf	0.0524217	13.5847	0	8.2093	13.1413	19.4035	0	0	0	7	14	17	0	0	0	middle
67	mtr-MIR2632c-p3		ATGGGCACCACGTCGCTAATGACA	up	inf	inf	0.0536394	0	5.03963	0	0	0	7.11852	5.09551	2.90488	0	0	0	7	5	3	middle
68	PC-5p-7716_581		TGATGCCTTTTCAATCAGCCCG	down	-inf	-inf	0.054264	154.142	0	227.515	130.475	104.437	0	0	0	194	139	91.5	0	0	0	middle
69	vvi-miR3630-3p_L-1_1ss2TG		GTGGGAATCTCTCTGATGCAC	up	3.62492	1.85795	0.0557397	6.21761	22.5384	6.45016	12.2027	0	15.254	20.8916	31.4695	5.5	13	0	15	20.5	32.5	middle
70	PC-5p-34656_147		CAGGGACCTCTCAATGGGCTAACT	down	0.646093	-0.630187	0.0570342	42.897	27.7154	51.6013	39.424	37.6657	31.5249	25.4776	26.1439	44	42	33	31	25	27	middle
71	mtr-MIR2662-p3_1ss10GA		AAAATGAAAACCGCAAACCAAACC	down	0.213621	-2.22688	0.0577203	10.5765	2.25935	9.38205	7.50934	14.838	0	0	6.77805	8	8	13	0	0	7	middle
72	PC-3p-125_18340		TCGCCTTGTACCAACCTACTGC	up	3.16044	1.66012	0.0587975	537.447	1698.57	1114.7	443.99	53.6451	1103.88	1806.87	2184.95	950.5	473	47	1085.5	1773	2256.5	high
73	gma-miR166a-3p_L+1R+1		CTCGGACCAGGCTTCATTCCCCT	up	2.78769	1.47907	0.0588712	6.10018	17.0054	7.03654	11.264	0	20.3386	13.2483	17.4293	6	12	0	20	13	18	middle
74	PC-5p-3456_1134		TCTTTAATCTCCGATCCCAAT	up	1.21225	0.277692	0.0613987	166.389	201.706	167.704	151.125	180.339	191.691	222.674	190.754	143	161	158	188.5	218.5	197	middle
75	PC-5p-84160_59		GGGTTTTGGTTTGGGTCGAGGACC	up	4.42964	2.14719	0.0614337	0.938667	4.15796	0	2.816	0	5.08465	2.54776	4.84146	0	3	0	5	2.5	5	middle
76	PC-3p-85319_58		TTTTGTATATGCGTTAGTGTGAAT	down	0.207658	-2.26772	0.0616705	5.71332	1.18642	3.51827	5.632	7.98969	3.55926	0	0	3	6	7	3.5	0	0	low
77	PC-5p-81720_61		TTGAATAACTTACGTATCTGG	up	3.20245	1.67918	0.0620475	2.3459	7.51262	4.69103	2.34667	0	5.08465	10.191	7.26219	4	2.5	0	5	10	7.5	middle
78	nta-miR168d_R+2		TCGCTTGGTGCAGGTCGGGAATT	up	1.82338	0.866617	0.0638016	17.9025	32.643	21.1096	23.4667	9.13107	29.491	32.6113	35.8268	18	25	8	29	32	37	middle
79	vvi-miR172d_L-2R+1_1ss11GT		AGAATCTTTATGATGCTGCATT	up	1.70657	0.771096	0.0638994	262.508	447.988	298.467	187.733	301.325	514.058	496.812	333.093	254.5	200	264	505.5	487.5	344	middle
80	mtr-MIR164b-p3		CATGTGCCCCTCTTCCCCATC	up	1.81501	0.859978	0.0643523	342.12	620.952	287.325	372.651	366.384	463.72	659.359	739.776	245	397	321	456	647	764	high
81	PC-3p-134819_32		AGGACGCTCGAGAAACTCATAGGA	down	0.182211	-2.45632	0.0659507	9.32162	1.6985	7.03654	14.08	6.84831	0	5.09551	0	6	15	6	0	5	0	middle
82	PC-3p-49158_105		AGATTTCCACTTGCACTTGAA	down	0.227532	-2.13586	0.067299	30.2228	6.87665	41.6329	31.9147	17.1208	3.55926	12.2292	4.84146	35.5	34	15	3.5	12	5	middle
83	PC-5p-38793_132		AAAGTAGGTAGTGTGTGTTT	up	4.21636	2.076	0.0680274	5.2774	22.2514	15.8322	0	0	24.4063	14.2674	28.0805	13.5	0	0	24	14	29	middle
84	PC-3p-46470_111		GGGATCGGAGATTAGAGAAT	down	0.340868	-1.55272	0.0689929	10.4566	3.56432	13.4867	7.04	10.8431	3.55926	7.13371	0	11.5	7.5	9.5	3.5	7	0	middle
85	gma-MIR5678-p5_2ss11AG18GT		CATGGTTCTAGAATTTCTGTT	down	0.607805	-0.718321	0.0691288	161.986	98.456	153.631	157.696	174.632	132.709	96.8147	65.8439	131	168	153	130.5	95	68	middle
86	PC-3p-152521_27		TCGCCTTGTACCAACCGACTGC	down	-inf	-inf	0.069248	5.86454	0	2.93189	6.10134	8.56038	0	0	0	2.5	6.5	7.5	0	0	0	low
87	mtr-MIR2592ae-p3		TTTCAGAGGTAAGACAATTGT	down	0.460268	-1.11945	0.0704594	268.128	123.411	267.388	187.733	349.264	127.116	176.305	66.8122	228	200	306	125	173	69	middle
88	mtr-MIR2670a-p5		TGGGGTAAAATAGTGAGTAGC	down	0.372517	-1.42462	0.0704861	10.322	3.84512	7.03654	12.5156	11.4138	6.77954	4.75581	0	6	13.3333	10	6.66667	4.66667	0	middle
89	gma-MIR167c-p5		TCAGGTCATCTTGCAGCTTCA	up	11.6606	3.54357	0.0710567	0.938667	10.9455	0	2.816	0	14.237	13.7579	4.84146	0	3	0	14	13.5	5	middle
90	mtr-MIR2614-p5_1ss9GC		AAATGAGTCGAGTCGAACCGAACC	up	1.72935	0.790231	0.0712315	49.1853	85.0587	39.8737	56.32	51.3623	104.744	65.2225	85.2097	34	60	45	103	64	88	middle
91	gma-MIR6300-p3_1ss9GT_1		AGTATAGTTGTAAGTATTCCCGCC	up	4.28467	2.09918	0.0718231	1.17276	5.02487	3.51827	0	0	4.06772	7.13371	3.87317	3	0	0	4	7	4	low
92	gma-MIR6300-p5_1ss9GT_1		AGTATAGTTGTAAGTATTCCCGCC	up	4.28467	2.09918	0.0718231	1.17276	5.02487	3.51827	0	0	4.06772	7.13371	3.87317	3	0	0	4	7	4	low
93	gma-MIR6300-p3_1ss9GT_2		GTAGTATATTGGTAAGTATTCCCGC	up	4.28467	2.09918	0.0718231	1.17276	5.02487	3.51827	0	0	4.06772	7.13371	3.87317	3	0	0	4	7	4	low
94	gma-MIR6300-p5_1ss9GT_2		GTAGTATATTGGTAAGTATTCCCG	up	4.28467	2.09918	0.0718231	1.17276	5.02487	3.51827	0	0	4.06772	7.13371	3.87317	3	0	0	4	7	4	low
95	mtr-MIR2593b-p3_1ss14AT		CATACATCATTAATTGAATGAACC	up	1.55348	0.635504	0.0723146	43.6258	67.7718	29.6121	56.0854	45.1798	79.8291	62.0803	61.4059	25.25	59.75	39.5833	78.5	60.9167	63.4167	middle
96	mtr-MIR2593a-p3_1ss14AT		CATACATCATTAATTGAATGAACC	up	1.55348	0.635504	0.0723146	43.6258	67.7718	29.6121	56.0854	45.1798	79.8291	62.0803	61.4059	25.25	59.75	39.5833	78.5	60.9167	63.4167	middle
97	mtr-miR2593d_L+1R-1_1ss12GA		CATACATCATTAATTGAATGAACC	up	1.55348	0.635504	0.0723146	43.6258	67.7718	29.6121	56.0854	45.1798	79.8291	62.0803	61.4059	25.25	59.75	39.5833	78.5	60.9167	63.4167	middle
98	PC-5p-11868_399		TCTCACAGCAGTTTCAAGGACC	up	12.2365	3.61312	0.0744265	4.86227	59.4972	0	11.7333	2.85346	44.2365	41.7832	92.4719	0	12.5	2.5	43.5	41	95.5	middle
99	PC-3p-3233_1195		TTTCGTTCCATACATCATCTAA	down	0.677294	-0.562146	0.0744529	86.0453	58.2779	69.1926	89.6427	99.3004	72.2021	48.4073	54.2244	59	95.5	87	71	47.5	56	middle
100	mtr-miR2592a.2-3p		AAATGCTTGAGTCCTGTTGTT	down	0.554007	-0.852024	0.0747711	8.32104	4.60991	8.0627	7.62667	9.27375	4.95754	6.49549	2.37672	6.875	8.125	8.125	4.875	6.37374	2.45455	middle
101	gma-miR160a-3p		GCGTATGAGGAGCCAAGCATA	down	0.488209	-1.03443	0.0749782	406.543	198.478	392.873	299.435	527.319	238.979	196.687	159.768	335	319	462	235	193	165	middle
102	ath-miR8175_L+4		GTTCGATCCCCGGCAACGGCGCCA	down	0.578081	-0.790657	0.076874	9.82115	5.67742	7.62292	9.85601	11.9845	6.10158	5.60506	5.32561	6.5	10.5	10.5	6	5.5	5.5	middle
103	PC-5p-53724_96		ACAGACGTCCCATGATCCTTA	down	0.308175	-1.69818	0.0770582	15.4134	4.75002	11.7276	22.528	11.9845	8.13545	6.11461	0	10	24	10.5	8	6	0	middle
104	PC-5p-96318_50		TGATTTGTGATCTAGCGGAGAAG	down	0.173999	-2.52285	0.0772763	11.1298	1.93659	16.4186	11.264	5.70692	0	0	5.80976	14	12	5	0	0	6	middle
105	mtr-MIR2620-p5_2ss18AG20CT		AGTGATGAAGACCTCCCGGTGG	up	inf	inf	0.077636	0	3.96451	0	0	0	2.54233	3.05731	6.2939	0	0	0	2.5	3	6.5	low
106	mtr-miR5241a_L+2R-2		TGTGACTGAATGGAAGAGTGC	down	0.374409	-1.41731	0.078764	5.89068	2.20552	5.86378	6.10134	5.70692	3.55926	3.05731	0	5	6.5	5	3.5	3	0	low
107	mtr-miR2111l_1ss6TC		ATCCTCGGAATGCAGATTATC	up	11.2279	3.48901	0.0787667	1.09511	12.2958	0	3.28534	0	14.237	17.3247	5.32561	0	3.5	0	14	17	5.5	middle
108	mtr-MIR5230-p5_1ss11CG		AGATTGTAGAGAAATGTGGAG	down	0.236819	-2.07814	0.0789426	4.30329	1.0191	4.69103	4.224	3.99484	0	3.05731	0	4	4.5	3.5	0	3	0	low
109	PC-5p-51743_100		TGTTAGAGTGGGGTGTCGAAT	down	0.358048	-1.48178	0.0793145	10.233	3.6639	11.1412	9.85601	9.70177	7.11852	0	3.87317	9.5	10.5	8.5	7	0	4	middle
110	PC-3p-116298_40		ACACTTGTGACATTGTAGTTGACC	down	0.369984	-1.43447	0.0798475	13.2956	4.91915	14.6595	12.672	12.5552	9.15238	5.60506	0	12.5	13.5	11	9	5.5	0	middle
111	mtr-MIR2648-p3_2ss7CT20TC		TGTCATTTCCATTGTGTTACC	down	0.637765	-0.648904	0.0814385	39.1941	24.9966	39.2873	41.7707	36.5243	32.5418	25.9871	16.461	33.5	44.5	32	32	25.5	17	middle
112	PC-5p-5881_740		AGGGATTTGGGTGAGGGACAT	down	0.477692	-1.06585	0.0821841	66.9172	31.9658	49.8421	88.704	62.2054	37.6264	32.6113	25.6598	42.5	94.5	54.5	37	32	26.5	middle
113	PC-5p-26185_192		TGATGCCTTACATCCACGACC	up	2.63424	1.39739	0.0839502	10.0295	26.42	5.86378	9.38667	14.838	37.6264	19.3629	22.2707	5	10	13	37	19	23	middle
114	mtr-MIR2671e-p3		TTAAGGGACCAAAACGAAACC	down	0.8089	-0.305967	0.0844179	498.31	403.083	493.34	515.172	486.42	464.398	360.762	384.089	420.667	548.833	426.167	456.667	354	396.667	middle
115	mtr-miR2111l		ATCCTTGGAATGCAGATTATC	up	2.80609	1.48856	0.085174	20.1008	56.4047	36.3554	15.9573	7.98969	53.8973	79.49	35.8268	31	17	7	53	78	37	middle
116	PC-5p-174093_22		AAGGAGATTTAGTGCACGATG	down	0.26104	-1.93766	0.0863353	3.09113	0.806911	2.93189	2.34667	3.99484	0	0	2.42073	2.5	2.5	3.5	0	0	2.5	low
117	PC-5p-32217_158		TACAGTCACGCACCTAGCTAC	down	-inf	-inf	0.0865918	11.0514	0	17.5913	9.85601	5.70692	0	0	0	15	10.5	5	0	0	0	middle
118	ptc-miR166a_R+2		TCGGACCAGGCTTCATTCCCCTT	up	1.68818	0.75547	0.0867204	27.1517	45.8371	15.8322	29.0987	36.5243	35.0841	54.0124	48.4146	13.5	31	32	34.5	53	50	middle
119	mtr-miR168c-3p		CCCGCCTTGCATCAACTGAAT	down	0.565001	-0.823675	0.0869329	5745.26	3246.07	6278.94	4124.5	6832.33	3596.88	2921.77	3219.57	5354	4394	5986	3537	2867	3325	high
120	PC-3p-38326_134		GGATCGGAGATTAGAGAATT	down	0.563507	-0.827495	0.0882568	15.7714	8.88728	18.7641	13.1413	15.4087	6.61005	13.7579	6.2939	16	14	13.5	6.5	13.5	6.5	middle
121	PC-3p-111794_42		TGTTGTTCTATCTGTGACAGG	up	inf	inf	0.0886346	0	6.86275	0	0	0	11.1862	4.07641	5.32561	0	0	0	11	4	5.5	middle
122	ptc-miR160a_R+1		TGCCTGGCTCCCTGTATGCCAC	up	inf	inf	0.0888617	0	8.46543	0	0	0	3.05079	11.2101	11.1354	0	0	0	3	11	11.5	middle
123	mtr-miR5214-3p		TGATAGAGCTAGACCATCGGAG	down	0.634113	-0.657188	0.0898191	2089.41	1324.92	2200.09	2498.73	1569.4	1566.07	1098.59	1310.1	1876	2662	1375	1540	1078	1353	high
124	PC-3p-30358_167		TGTCCCTCATCCTCATCCTTC	up	3.03236	1.60044	0.0902993	5.94856	18.0382	0	9.85601	7.98969	13.7286	13.7579	26.628	0	10.5	7	13.5	13.5	27.5	middle
125	PC-5p-28055_180		AAAAATGGTTCAGTTATTCCGGGA	up	2.64102	1.40109	0.0904323	11.5498	30.5032	15.2458	0	19.4035	29.491	20.382	41.6366	13	0	17	29	20	43	middle
126	PC-3p-38166_134		TCTTGCAGCTATGTGGCACTC	down	0.137898	-2.85833	0.0904429	12.3171	1.6985	18.7641	5.632	12.5552	0	5.09551	0	16	6	11	0	5	0	middle
127	mtr-MIR319d-p5		AGCTGCTGACTCATTCATTCA	down	0.357266	-1.48493	0.0912783	13.9145	4.97116	12.9003	19.712	9.13107	8.13545	0	6.77805	11	21	8	8	0	7	middle
128	mtr-MIR2620-p3		TTTGAAAGTATTGTGGGGAAT	down	0.138331	-2.8538	0.0922845	5.83318	0.806911	9.38205	4.69334	3.42415	0	0	2.42073	8	5	3	0	0	2.5	low
129	mtr-MIR2620-p5		TTTGAAAGTATTGTGGGGAAT	down	0.138331	-2.8538	0.0922845	5.83318	0.806911	9.38205	4.69334	3.42415	0	0	2.42073	8	5	3	0	0	2.5	low
130	gma-MIR391-p5_3ss9AC17CT20TC		TACGCAGGCGAGATGATGCCG	up	5.44462	2.44483	0.0928061	2.54174	13.8388	2.93189	4.69334	0	6.61005	20.382	14.5244	2.5	5	0	6.5	20	15	middle
131	PC-3p-188165_19		AGGTGTGGAATGAATGTATAAAGT	up	3.72582	1.89756	0.0941753	1.87733	6.9946	0	5.632	0	5.08465	8.15282	7.74634	0	6	0	5	8	8	low
132	mtr-miR2652a_R+3_2ss7GC21TC		TATGCACGGTGCATAAGGATCTCC	up	1.28136	0.357676	0.0951877	163.874	209.981	133.694	192.427	165.501	189.149	218.088	222.707	114	205	145	186	214	230	middle
133	PC-5p-32096_159		AATAAGCACCCCCTTTGTGACACC	up	1.6743	0.743557	0.0964763	18.0843	30.2784	18.7641	20.6507	14.838	34.5756	21.4011	34.8585	16	22	13	34	21	36	middle
134	mtr-miR5232_L-1R+1		ACATGTCGCTCTCACCTGAAG	down	0.560008	-0.836479	0.0970031	464.134	259.919	553.541	404.566	434.297	411.348	174.266	194.143	472	431	380.5	404.5	171	200.5	middle
135	PC-3p-45801_112		GTTGTCGATTGGTGTAAAGGT	down	0.156928	-2.67183	0.0973585	29.5502	4.63725	23.4551	46.9334	18.2621	0	7.13371	6.77805	20	50	16	0	7	7	middle
136	PC-5p-69768_73		TTTTGATTTGGGTCGAGGACC	up	inf	inf	0.0995877	0	16.2006	0	0	0	6.10158	17.3247	25.1756	0	0	0	6	17	26	middle
137	PC-3p-2724_1377		TGTCCCTCATCCTCATCCTTCA	up	2.01139	1.00819	0.0998097	58.6759	118.02	36.9418	69.4614	69.6244	95.5915	95.7956	162.673	31.5	74	61	94	94	168	middle
138	PC-5p-648_4476		TCTTTAATCTCCGATCCCAAA	up	1.46562	0.551516	0.100351	554.425	812.579	611.592	536.918	514.764	936.085	627.767	873.884	521.5	572	451	920.5	616	902.5	high
139	PC-5p-39678_129		TATAATCGCTTTCATCGGCATC	down	0.227905	-2.1335	0.100587	17.8865	4.07641	22.2824	7.97867	23.3984	0	12.2292	0	19	8.5	20.5	0	12	0	middle
140	mtr-MIR5258-p5_1ss7AG		TATGTCGCTATTCAGAATTGC	down	0.240975	-2.05305	0.100858	8.45816	2.0382	4.10465	9.85601	11.4138	0	6.11461	0	3.5	10.5	10	0	6	0	middle
141	mtr-miR2585a_R-1		CAGGATTAGCGATTACAGGGA	down	0.550107	-0.862215	0.102104	473.536	260.496	313.126	532.224	575.258	168.811	325.094	287.583	267	567	504	166	319	297	middle
142	mtr-MIR5230-p5_1ss7CG		TGTAGAGAAATGTGGAGGGTT	down	0.260726	-1.93939	0.102417	10.4232	2.71761	11.1412	9.85601	10.2725	0	8.15282	0	9.5	10.5	9	0	8	0	middle
143	PC-5p-8819_520		TGAAAGTGTAGAGAGTAGATT	down	0.0942037	-3.40807	0.10294	67.5064	6.35935	60.397	34.2614	107.861	2.54233	11.2101	5.32561	51.5	36.5	94.5	2.5	11	5.5	middle
144	mtr-MIR395o-p5		AGTTCCTCTGAACTCTTCATC	down	0.148455	-2.7519	0.103287	24.4861	3.63509	9.38205	30.976	33.1001	0	5.09551	5.80976	8	33	29	0	5	6	middle
145	PC-5p-169506_23		TTAATCAGGGAAATCACAGTTA	down	0.2678	-1.90077	0.104431	6.02621	1.61382	3.51827	6.57067	7.98969	0	0	4.84146	3	7	7	0	0	5	low
146	PC-5p-53080_97		TCTAATCTCTGATCCCAAATACGC	up	2.82832	1.49995	0.105839	5.09877	14.421	0	8.448	6.84831	11.6947	21.4011	10.1671	0	9	6	11.5	21	10.5	middle
147	PC-5p-15211_318		CAAAGATCCACCAATCTCACC	up	2.95551	1.56341	0.105902	10.309	30.4683	3.51827	13.1413	14.2673	42.2026	15.7961	33.4061	3	14	12.5	41.5	15.5	34.5	middle
148	mtr-miR156j		TGACAGAAGAGGGTGAGCAC	down	0.388712	-1.36323	0.106392	5.67392	2.20552	5.2774	3.75467	7.98969	3.55926	3.05731	0	4.5	4	7	3.5	3	0	middle
149	PC-3p-44048_117		ATGGTTCTCGTTCAATAGAAT	down	-inf	-inf	0.10728	40.071	0	28.7325	22.9973	68.4831	0	0	0	24.5	24.5	60	0	0	0	middle
150	ptc-miR164a_1ss21AT		TGGAGAAGCAGGGCACGTGCT	up	1.53593	0.619114	0.109891	19.6793	30.226	17.005	22.0587	19.9742	24.9148	27.5158	38.2476	14.5	23.5	17.5	24.5	27	39.5	middle
151	csi-miR160c-5p_R-1_1ss19CT		TGCCTGGCTCCCTGTATGTT	up	2.12269	1.08589	0.111522	14.5411	30.8662	18.7641	11.7333	13.1259	19.8301	41.7832	30.9854	16	12.5	11.5	19.5	41	32	middle
152	PC-5p-75143_67		AATAGGCACCCCCTTTGTGACACC	up	2.32839	1.21933	0.11258	5.16151	12.018	7.03654	8.448	0	11.1862	13.2483	11.6195	6	9	0	11	13	12	middle
153	ppe-MIR399k-p5_1		AGGGCTTCTCTTTCTTGGCAG	up	inf	inf	0.112951	0	9.73484	0	0	0	9.66084	3.56686	15.9768	0	0	0	9.5	3.5	16.5	middle
154	ppe-MIR399k-p5_2		GGGCTTCTCTTTCTTGGCAGG	up	inf	inf	0.112951	0	9.73484	0	0	0	9.66084	3.56686	15.9768	0	0	0	9.5	3.5	16.5	middle
155	mtr-miR5261		TCATTGTAGATGGCTTTGGCT	down	0.557603	-0.84269	0.113597	148.628	82.8754	155.977	100.437	189.47	116.947	58.0888	73.5902	133	107	166	115	57	76	middle
156	stu-MIR482a-p3_2ss7TA22GT		TCCAATACCACCCATTCCTATT	down	0.443012	-1.17458	0.114245	22.028	9.75865	15.8322	26.2827	23.9691	0	14.2674	15.0085	13.5	28	21	0	14	15.5	middle
157	lja-miR1511-3p_R-2_1ss22AC		AACCAGGCTCTGATACCATGAC	up	1.71362	0.777049	0.115177	17.2774	29.607	16.4186	26.2827	9.13107	34.5756	29.554	24.6915	14	28	8	34	29	25.5	middle
158	mtr-MIR1510b-p5_2		TGTTTTACCCGCTCCTCCCATC	up	1.40474	0.490303	0.1186	1774.76	2493.08	1501.13	2245.76	1577.39	2283.01	2163.04	3033.18	1280	2392.5	1382	2245	2122.5	3132.5	high
159	mtr-MIR1510b-p5_1		TCCCTACCATGTGGACTCCATC	up	1.40474	0.490303	0.1186	1774.76	2493.08	1501.13	2245.76	1577.39	2283.01	2163.04	3033.18	1280	2392.5	1382	2245	2122.5	3132.5	high
160	PC-5p-53007_97		CTGAGTTTGGCTAAATCACTG	down	0.694416	-0.526128	0.118898	6.2816	4.36204	7.03654	6.10134	5.70692	4.57619	5.60506	2.90488	6	6.5	5	4.5	5.5	3	low
161	mtr-MIR2604-p5_1ss1AG		GTTTTTATGTGGGAGTGTTTTAGC	up	1.24437	0.315412	0.11956	131.544	163.689	106.721	136.107	151.804	149.489	170.19	171.388	91	145	133	147	167	177	middle
162	PC-3p-125138_36		AGTCGTCGTGATTCTGGTACACCC	up	4.10576	2.03765	0.121409	1.87733	7.70788	0	5.632	0	5.08465	12.2292	5.80976	0	6	0	5	12	6	middle
163	gma-miR396b-3p_R+1		GCTCAAGAAAGCTGTGGGAGAC	up	8.57701	3.10047	0.121643	5.24399	44.9777	3.51827	4.224	7.98969	14.237	61.1461	59.55	3	4.5	7	14	60	61.5	middle
164	PC-3p-42228_122		TGCCATATGGTGTCTAGGACTT	up	4.5421	2.18336	0.121805	3.59948	16.3492	3.51827	3.28534	3.99484	12.2032	10.7006	26.1439	3	3.5	3.5	12	10.5	27	middle
165	mtr-MIR2619b-p3_1ss15TA		TGCCACGTCAGCGTAGACCGAGTC	up	1.40339	0.488913	0.122812	196.596	275.9	165.359	241.237	183.192	268.47	224.202	335.029	141	257	160.5	264	220	346	middle
166	mtr-MIR5294c-p5_1ss5AG		AGAGGTCCCTGCCCTCAGCCGTTT	up	2.41188	1.27016	0.123386	27.5561	66.4619	18.7641	58.1974	5.70692	61.6938	62.1652	75.5268	16	62	5	60.6667	61	78	middle
167	aly-miR172c-5p_R+1_2ss2GT21AT		GTAGCATCATCAAGATTCACTC	up	8.12819	3.02293	0.124077	4.06756	33.0619	0	12.2027	0	38.6434	10.191	50.3512	0	13	0	38	10	52	middle
168	mtr-MIR5230-p5_2ss9GA20CG		TTGGCAAGAAGATTGTAGAGA	down	0.489344	-1.03108	0.124602	37.1153	18.1622	52.774	30.0373	28.5346	17.2878	27.5158	9.68293	45	32	25	17	27	10	middle
169	mtr-MIR2620-p5_2ss8GA20CT		GTATTGTAGGGAATGTGACTGC	up	1.63983	0.713542	0.124664	56.6852	92.9538	55.1196	54.4427	60.4934	87.456	71.3371	120.068	47	58	53	86	70	124	middle
170	mtr-MIR5297-p5_2ss10AC18GA		TCGGATACTCTCCTGATACGTATC	up	2.2999	1.20157	0.125506	8.13281	18.7046	14.0731	10.3253	0	19.3217	19.3629	17.4293	12	11	0	19	19	18	middle
171	PC-5p-100958_48		ATTGCATCTGGACCACATATTGCC	up	3.50686	1.81018	0.125683	0.951153	3.33556	0	0	2.85346	3.05079	3.56686	3.38902	0	0	2.5	3	3.5	3.5	low
172	csi-miR160c-5p_R-1		TGCCTGGCTCCCTGTATGCT	up	2.01085	1.00781	0.126782	5.19694	10.4503	8.2093	2.816	4.56554	6.61005	10.7006	14.0402	7	3	4	6.5	10.5	14.5	middle
173	mtr-MIR2088-p3		CAGTCCAAACTTGAGATGGTT	down	0.414159	-1.27174	0.128425	25.0394	10.3703	16.4186	34.7307	23.9691	0	12.2292	18.8817	14	37	21	0	12	19.5	middle
174	PC-5p-84572_59		TGGGTGTGTCAGAATCATGGT	down	0.579607	-0.786853	0.129854	5.16877	2.99586	6.45016	5.632	3.42415	3.05079	2.54776	3.38902	5.5	6	3	3	2.5	3.5	low
175	mtr-MIR2587a-p3		TTGTGTGGGGTTCATATAACGGTC	up	1.41274	0.498495	0.131372	7.97622	11.2683	5.55105	10.3879	7.98969	11.254	12.0933	10.4576	4.73333	11.0667	7	11.0667	11.8667	10.8	middle
176	mtr-MIR2587b-p3		TTGTGTGGGGTTCATATAACGGTC	up	1.41274	0.498495	0.131372	7.97622	11.2683	5.55105	10.3879	7.98969	11.254	12.0933	10.4576	4.73333	11.0667	7	11.0667	11.8667	10.8	middle
177	PC-3p-41838_123		TTCGATGTAATATACCTTGGGT	up	2.48866	1.31537	0.131742	10.1654	25.2983	21.1096	9.38667	0	15.254	31.5922	29.0488	18	10	0	15	31	30	middle
178	PC-5p-4774_877		TGAGTGAAAAAGGAATACTGCA	down	0.696858	-0.521062	0.131896	63.8873	44.5204	63.3288	76.9707	51.3623	58.4735	39.745	35.3427	54	82	45	57.5	39	36.5	middle
179	PC-3p-208396_16		TTGCTTATCTATGGCCTTGTGC	up	inf	inf	0.132359	0	4.27881	0	0	0	2.54233	2.54776	7.74634	0	0	0	2.5	2.5	8	low
180	PC-5p-196901_18		GAAGTTCGGTCAACATGTGCTAG	up	inf	inf	0.132359	0	8.55762	0	0	0	5.08465	5.09551	15.4927	0	0	0	5	5	16	middle
181	mtr-MIR2601-p3_2ss15TC21CT		TTAAGGGACCAAAGCGATACT	up	inf	inf	0.135371	0	9.23653	0	0	0	5.08465	16.8152	5.80976	0	0	0	5	16.5	6	middle
182	PC-3p-7863_573		ATCGGAGATTAGAGAATTCA	down	0.306544	-1.70583	0.135382	93.3334	28.6108	147.181	61.4827	71.3365	38.1349	24.4585	23.239	125.5	65.5	62.5	37.5	24	24	middle
183	PC-3p-3871_1041		TGTCCCTTATCCTCATCCTTCA	down	0.642519	-0.638189	0.13599	124.323	79.8802	88.5431	154.88	129.547	79.3206	59.6175	100.702	75.5	165	113.5	78	58.5	104	middle
184	PC-5p-1065_2991		TCTTTAATCTCCGATCCCAAAT	up	1.24554	0.316772	0.13691	309.117	385.018	357.691	284.885	284.775	398.637	324.074	432.343	305	303.5	249.5	392	318	446.5	middle
185	PC-5p-38882_132		AGGGCTGTCCGAATCACTTAGAGA	down	0.372308	-1.42543	0.137742	11.8566	4.4143	8.79567	10.7947	15.9794	2.54233	10.7006	0	7.5	11.5	14	2.5	10.5	0	middle
186	PC-5p-240632_12		GGTTGACGACATGTGGCATTGGCT	down	0.286316	-1.80432	0.138621	5.91962	1.69488	2.93189	7.97867	6.84831	5.08465	0	0	2.5	8.5	6	5	0	0	low
187	PC-3p-22638_219		ATCGGAGATTAGAGAATTC	down	0.332589	-1.58819	0.138671	49.977	16.6218	78.5747	34.2614	37.095	21.864	17.8343	10.1671	67	36.5	32.5	21.5	17.5	10.5	middle
188	nta-MIR168a-p3_1ss17TC		CCCGCCTTGCATCAACCGAATT	up	6.61944	2.72671	0.140493	1.14138	7.55533	0	0	3.42415	4.57619	13.2483	4.84146	0	0	3	4.5	13	5	middle
189	nta-MIR168d-p3_1ss17TC		CCCGCCTTGCATCAACCGAATT	up	6.61944	2.72671	0.140493	1.14138	7.55533	0	0	3.42415	4.57619	13.2483	4.84146	0	0	3	4.5	13	5	middle
190	PC-5p-3993_1014		TCGGGTGAGAGAAACACGTATC	down	0.50254	-0.992689	0.140937	156.286	78.5399	181.777	105.6	181.48	144.404	52.4838	38.7317	155	112.5	159	142	51.5	40	middle
191	PC-3p-47242_109		AACTTAGCCACCAAATAAACTTGG	up	5.25554	2.39384	0.141279	6.84339	35.9657	6.45016	14.08	0	16.2709	31.5922	60.0341	5.5	15	0	16	31	62	middle
192	PC-3p-22949_217		CTGTGTTTTCCTTGATTAAAC	down	0.494872	-1.01487	0.14134	21.0189	10.4017	11.7276	23.936	27.3932	14.7455	9.68147	6.77805	10	25.5	24	14.5	9.5	7	middle
193	mtr-MIR2629b-p5_1ss23TC		TTTCCTCGGTAGTTAACTGCAGCC	up	1.22573	0.293636	0.143037	207.404	254.22	172.395	244.366	205.449	277.453	231.676	253.531	147	260.333	180	272.833	227.333	261.833	middle
194	mtr-MIR2629a-p5_1ss24TC		TTTCCTCGGTAGTTAACTGCAGCC	up	1.22573	0.293636	0.143037	207.404	254.22	172.395	244.366	205.449	277.453	231.676	253.531	147	260.333	180	272.833	227.333	261.833	middle
195	mtr-MIR2629e-p5_1ss23TC		TTTCCTCGGTAGTTAACTGCAGCC	up	1.22573	0.293636	0.143037	207.404	254.22	172.395	244.366	205.449	277.453	231.676	253.531	147	260.333	180	272.833	227.333	261.833	middle
196	PC-3p-78759_64		TTAGACACACTGAAAAGAAAAG	down	0.391354	-1.35345	0.143335	14.7414	5.76912	22.2824	9.38667	12.5552	8.13545	9.17192	0	19	10	11	8	9	0	middle
197	PC-5p-39525_130		ATTAGGTGGTAGATAAGGGTT	down	0.441597	-1.1792	0.143827	22.6643	10.0085	27.5598	13.6107	26.8225	17.7963	12.2292	0	23.5	14.5	23.5	17.5	12	0	middle
198	mtr-MIR2610a-p5_1ss2AG		CGCAGTGCTGGTTTCATTCATG	up	3.23888	1.69549	0.144782	0.977297	3.16535	2.93189	0	0	3.55926	2.54776	3.38902	2.5	0	0	3.5	2.5	3.5	low
199	stu-MIR482a-p3_1ss21TC		TTTCCAATTCCACCCATTCCCA	down	0.724356	-0.46523	0.144935	80.3131	58.1752	82.093	78.3787	80.4676	73.7275	40.7641	60.0341	70	83.5	70.5	72.5	40	62	middle
200	mtr-MIR2630l-p3		AACAAAATACCAAGGACCAAAACC	down	0.557717	-0.842395	0.145464	3.94287	2.19901	4.70219	4.15882	2.9676	2.91036	3.04113	0.645528	4.00952	4.43056	2.6	2.8619	2.98413	0.666667	low
201	mtr-MIR2670f-p3_2ss13TG17AG		TTTTCCCCAACAGGACGGATC	up	18.4246	4.20356	0.145996	1.90231	35.0493	0	0	5.70692	61.0158	11.2101	32.9219	0	0	5	60	11	34	middle
202	mtr-miR172a		AGAATCCTGATGATGCTGCAG	down	0.541347	-0.885374	0.146687	91.3199	49.4357	100.857	86.3574	86.7452	40.6772	22.4202	85.2097	86	92	76	40	22	88	middle
203	PC-5p-88498_56		CAAAAATGAGTCAAAGAAAGT	down	0.30439	-1.71601	0.147433	8.90901	2.71182	8.2093	9.38667	9.13107	8.13545	0	0	7	10	8	8	0	0	low
204	PC-3p-7700_582		ACAACAAGGGCATCGGGGTTTACT	down	0.0575702	-4.11853	0.148315	147.202	8.47442	37.5282	248.277	155.799	25.4233	0	0	32	264.5	136.5	25	0	0	middle
205	PC-5p-44564_115		TCTAATCTCTGATCTCAAATA	down	0.18886	-2.40461	0.148936	11.4673	2.16571	18.7641	4.224	11.4138	0	4.07641	2.42073	16	4.5	10	0	4	2.5	middle
206	mtr-miR156g-5p		TTGACAGAAGATAGAGGGCAC	down	0.54777	-0.868359	0.14902	2932.24	1606.19	3773.34	1820.08	3203.29	1670.82	1598.97	1548.78	3217.5	1939	2806.5	1643	1569	1599.5	high
207	mtr-MIR5256-p5_2ss10AG18TG		TGTAAGATTGAAATGGTGGAT	down	0.792687	-0.335176	0.149061	46.8717	37.1546	54.5332	42.7094	43.3726	38.1349	43.3118	30.0171	46.5	45.5	38	37.5	42.5	31	middle
208	mtr-miR160c		TGCCTGGCTCCCTGAATGCCA	down	0.688017	-0.539484	0.149226	153.906	105.89	158.908	188.672	114.138	94.0661	134.521	89.0829	135.5	201	100	92.5	132	92	middle
209	mes-miR160e_R-2		TGCCTGGCTCCCTGAATGCCA	down	0.688017	-0.539484	0.149226	153.906	105.89	158.908	188.672	114.138	94.0661	134.521	89.0829	135.5	201	100	92.5	132	92	middle
210	PC-3p-64862_79		TCCATCAGAATTGCCCCCTGAA	up	inf	inf	0.150824	0	22.7283	0	0	0	23.3894	5.09551	39.7	0	0	0	23	5	41	middle
211	mtr-miR1507-5p_R-1_2ss15CT18AG		AGAGTTGTATGGAATGAGAGA	down	0.583469	-0.777273	0.151231	1491.94	870.502	1521.07	979.03	1975.74	767.783	720.505	1123.22	1297	1043	1731	755	707	1160	high
212	mes-miR160a_1ss21AT		TGCCTGGCTCCCTGTATGCCT	up	1.49133	0.576597	0.152139	5.94577	8.86708	5.86378	7.97867	3.99484	11.1862	8.15282	7.26219	5	8.5	3.5	11	8	7.5	middle
213	tcc-miR162_R+1		TCGATAAACCTCTGCATCCAGA	down	0.66384	-0.591093	0.15241	5.25444	3.48811	4.69103	4.224	6.84831	3.55926	2.54776	4.35732	4	4.5	6	3.5	2.5	4.5	low
214	PC-3p-43841_117		TTCCCCAGGAGCTATTTGGCAT	up	inf	inf	0.153932	0	13.5038	0	0	0	23.8979	3.05731	13.5561	0	0	0	23.5	3	14	middle
215	PC-5p-14254_338		AGGGATTTGGGTGAGGGACATT	down	0.684164	-0.547585	0.154372	41.5754	28.4444	35.1827	39.8934	49.6502	21.3555	40.2545	23.7232	30	42.5	43.5	21	39.5	24.5	middle
216	mtr-miR2592bm-3p		GGAAAACATGAATGTCGGGTG	up	1.54552	0.628093	0.156098	5.68961	8.7934	7.03654	3.75467	6.27761	7.62698	7.13371	11.6195	6	4	5.5	7.5	7	12	middle
217	mtr-miR166e-5p		GGAATGTTGGCTGGCTCGAGG	up	1.47263	0.558394	0.157103	924.493	1361.44	891.295	950.244	931.94	1245.23	1091.63	1747.45	760	1012.33	816.5	1224.5	1071.17	1804.67	high
218	PC-3p-40138_128		TTTCGTTCCATACATCATCT	down	0.57055	-0.809575	0.157763	14.7708	8.42745	17.005	13.6107	13.6966	8.13545	13.7579	3.38902	14.5	14.5	12	8	13.5	3.5	middle
219	PC-5p-30523_166		ATACCTGCCACCCCTGATTGAGAG	down	0.237789	-2.07225	0.160945	22.4784	5.3451	21.696	36.608	9.13107	7.62698	3.56686	4.84146	18.5	39	8	7.5	3.5	5	middle
220	PC-5p-1873_1867		AGGGATTTGGGTGAGGGACATA	down	0.523775	-0.932981	0.161425	186.132	97.4913	131.349	266.112	160.935	94.0661	104.968	93.4402	112	283.5	141	92.5	103	96.5	middle
221	mtr-MIR2678-p3_2ss1AG21AG		GGGCATCAAAAAGAAAATCAG	down	0.393135	-1.3469	0.161704	6.90253	2.71362	4.10465	10.3253	6.27761	5.59312	2.54776	0	3.5	11	5.5	5.5	2.5	0	middle
222	PC-5p-11155_422		GTAATGAAAGAGCTGAAAAGGAAG	down	0.596856	-0.744545	0.162176	74.1828	44.2764	65.088	61.0134	96.447	31.0164	70.8276	30.9854	55.5	65	84.5	30.5	69.5	32	middle
223	mtr-MIR530-p3_2		AGGTGCAGATGCATATGCAGA	up	1.60328	0.681025	0.162251	21.4586	34.4041	29.3189	17.3653	17.6915	24.9148	45.8596	32.4378	25	18.5	15.5	24.5	45	33.5	middle
224	mtr-MIR530-p3_1		AGGTGCAGATGCATATGCAG	up	1.60328	0.681025	0.162251	21.4586	34.4041	29.3189	17.3653	17.6915	24.9148	45.8596	32.4378	25	18.5	15.5	24.5	45	33.5	middle
225	PC-3p-24405_205		TAGGGGGCTAAAATTGGCATG	down	0.423548	-1.2394	0.162656	16.9719	7.18841	16.4186	9.38667	25.1105	7.11852	8.15282	6.2939	14	10	22	7	8	6.5	middle
226	mtr-MIR2586a-p5_2ss12GA18GA		AGCACGGATACAGACACAGACACC	down	0.325105	-1.62102	0.167598	3.64934	1.18642	2.93189	5.16267	2.85346	3.55926	0	0	2.5	5.5	2.5	3.5	0	0	low
227	mtr-MIR2586a-p3_1ss20AG		AATTACAAGTGTCGGTGTCGTGTC	up	1.8219	0.865442	0.167782	110.816	201.895	51.6013	195.243	85.6038	193.217	154.904	257.566	44	208	75	190	152	266	middle
228	mtr-miR5745a		CGTGACAACACATCATTGGATGCA	up	1.23856	0.308658	0.169394	58.8251	72.8581	47.4966	71.3387	57.6399	75.7613	67.7703	75.0427	40.5	76	50.5	74.5	66.5	77.5	middle
229	mtr-miR2111g-3p		AGCCTCGGAGTGCGGATTATC	up	6.93887	2.7947	0.171668	6.10018	42.3284	7.03654	11.264	0	23.3894	77.4518	26.1439	6	12	0	23	76	27	middle
230	PC-3p-7953_568		GGAACAACGAGAGGATGAATGATC	down	0.283959	-1.81625	0.171992	119.505	33.9345	66.8471	89.6427	202.025	51.355	31.0826	19.3659	57	95.5	177	50.5	30.5	20	middle
231	mtr-miR169b		CAGCCAAGGATGACTTGCCGG	up	3.03813	1.60318	0.172356	1.09511	3.32709	0	3.28534	0	3.05079	3.05731	3.87317	0	3.5	0	3	3	4	low
232	mtr-MIR1510a-p5		TTACCCATTCCTCCCATCCCA	up	1.53985	0.622789	0.172998	576.572	887.834	570.546	636.416	522.754	727.105	743.945	1192.45	486.5	678	458	715	730	1231.5	high
233	mtr-MIR5275-p3_1ss14TC		CATGCTTGAATTTCTGGGAGT	up	4.51511	2.17476	0.173795	10.8685	49.0723	26.9734	5.632	0	26.4402	33.6304	87.1463	23	6	0	26	33	90	middle
234	PC-5p-24062_208		GGGATGCTTTCTGATTCGAGA	up	2.28031	1.18923	0.174182	7.48174	17.0607	7.03654	0	15.4087	14.7455	12.2292	24.2073	6	0	13.5	14.5	12	25	middle
235	PC-3p-102788_46		AGAGATTAGAGAATTCAAGGACTT	up	2.2628	1.17811	0.176476	6.98095	15.7965	2.93189	11.7333	6.27761	23.8979	14.777	8.71463	2.5	12.5	5.5	23.5	14.5	9	middle
236	PC-3p-25114_199		CAAGGTTCAGGATTTGGGTCA	down	0.469643	-1.09036	0.177362	22.3912	10.5159	23.4551	16.896	26.8225	20.8471	10.7006	0	20	18	23.5	20.5	10.5	0	middle
237	mtr-miR399k		TGCCAAAGAAGATTTGCCCTG	up	18.4298	4.20397	0.178124	0.488649	9.0057	1.46595	0	0	1.5254	16.0509	9.44085	1.25	0	0	1.5	15.75	9.75	middle
238	PC-3p-25637_196		TCATTGGTAGACCTGTACAAG	down	0.128214	-2.96338	0.178567	39.7084	5.09117	5.86378	51.6267	61.6347	6.10158	9.17192	0	5	55	54	6	9	0	middle
239	mtr-MIR396c-p5		TTCCACGGCTTTCTTGAACTG	up	1.33734	0.419367	0.178972	61.7815	82.6229	68.0199	75.0934	42.2312	67.1174	90.7001	90.0512	58	80	37	66	89	93	middle
240	peu-miR2916_R-1_2ss6AG21TG		TGGGGGCTCGAAGACGATCAGA	up	1.34992	0.432871	0.179623	595.804	804.287	476.139	613.888	697.386	724.055	1011.97	676.837	406	654	611	712	993	699	high
241	lja-miR1511-3p_R-3_1ss3CA		AAACAGGCTCTGATACCATGA	up	1.99442	0.99597	0.180385	13.5976	27.1194	25.8006	9.85601	5.13623	34.0672	16.3056	30.9854	22	10.5	4.5	33.5	16	32	middle
242	PC-3p-22528_220		TAATGGTTTCCTATAGATAATGGC	up	1.67563	0.744707	0.180766	87.1466	146.026	51.6013	127.659	82.1797	154.065	190.572	93.4402	44	136	72	151.5	187	96.5	middle
243	mtr-miR398a-3p_L+1R-1		TTGTGTTCTCAGGTCACCCCT	up	8.15158	3.02708	0.181967	93.3113	760.634	255.075	11.7333	13.1259	1196.93	990.567	94.4085	217.5	12.5	11.5	1177	972	97.5	high
244	mtr-MIR171b-p5		GTATTGGCGCGCCTCAATTTG	down	0.791441	-0.337446	0.182263	46.0001	36.4064	36.3554	52.5654	49.0795	39.6603	35.6686	33.8902	31	56	43	39	35	35	middle
245	mtr-MIR171b-p3_1ss20TC		TTGAGCCGCGTCAATATCTCG	down	0.871687	-0.198117	0.182648	459.83	400.828	476.139	404.566	498.785	414.908	356.686	430.89	406	431	437	408	350	445	middle
246	gra-miR167a_L-2R+2_1ss5AG		AGGTCATCTTGCAGCTTCAAT	up	6.23331	2.64	0.182806	3.87133	24.1312	4.10465	7.50934	0	42.7111	22.4202	7.26219	3.5	8	0	42	22	7.5	middle
247	PC-3p-8472_537		TGCCATATTGTGTCTGGGACTT	up	2.31569	1.21144	0.182945	23.2355	53.8063	45.7375	0	23.9691	67.6259	26.4967	67.2963	39	0	21	66.5	26	69.5	middle
248	PC-5p-275503_10		TGAGTGACATTGGTGACATTGGCC	up	inf	inf	0.183504	0	3.39339	0	0	0	5.08465	5.09551	0	0	0	0	5	5	0	low
249	PC-3p-227109_14		TGTGACAACATATCATAGGATGTA	up	inf	inf	0.183504	0	4.75074	0	0	0	7.11852	7.13371	0	0	0	0	7	7	0	low
250	PC-5p-401535_5		ATTCACACTGGTACTTTTAAGATC	up	inf	inf	0.183504	0	3.39339	0	0	0	5.08465	5.09551	0	0	0	0	5	5	0	low
251	PC-5p-180750_21		TAGGCACCAAGTGAATAAGATC	up	inf	inf	0.183557	0	8.93481	0	0	0	0	13.2483	13.5561	0	0	0	0	13	14	middle
252	PC-5p-243262_12		TAGTATTCTGAACATCCAGTT	down	-inf	-inf	0.183578	2.31414	0	3.51827	0	3.42415	0	0	0	3	0	3	0	0	0	low
253	PC-3p-181120_20		CGTATTTTGGGGTTTGAGAAA	down	-inf	-inf	0.183578	3.8569	0	5.86378	0	5.70692	0	0	0	5	0	5	0	0	0	low
254	PC-5p-429248_5		CTAAGAGCACATGTTAAAGAACCT	down	-inf	-inf	0.183578	3.8569	0	5.86378	0	5.70692	0	0	0	5	0	5	0	0	0	low
255	PC-5p-137803_31		TTTCCATTTCCCTTTCGCCAATT	down	-inf	-inf	0.183586	4.12632	0	0	6.10134	6.27761	0	0	0	0	6.5	5.5	0	0	0	low
256	PC-3p-196648_18		ATTAATTGGACCCCACACCCTCCC	up	inf	inf	0.183635	0	3.80494	0	0	0	0	5.60506	5.80976	0	0	0	0	5.5	6	low
257	PC-3p-342538_6		CTGGATGTTCCGAATACTATT	down	-inf	-inf	0.183669	3.83193	0	5.86378	5.632	0	0	0	0	5	6	0	0	0	0	low
258	PC-5p-195161_18		AACTCATGTTGCACTTTTAAGATC	down	-inf	-inf	0.183678	2.2365	0	0	3.28534	3.42415	0	0	0	0	3.5	3	0	0	0	low
259	gma-miR172h-5p_R+2_2ss2CT7GT		GTAGCATCATCAAGATTCACATT	up	inf	inf	0.183748	0	3.30871	0	0	0	5.08465	0	4.84146	0	0	0	5	0	5	low
260	gma-miR828a		TCTTGCTCAAATGAGTATTCCA	up	inf	inf	0.183748	0	1.65435	0	0	0	2.54233	0	2.42073	0	0	0	2.5	0	2.5	low
261	PC-5p-242307_12		GAAATGGAAGTGGAAGCAAATTCA	up	inf	inf	0.183748	0	1.98522	0	0	0	3.05079	0	2.90488	0	0	0	3	0	3	low
262	PC-5p-240396_12		AGTATCCCGGGGCACTCTTTAAGC	up	inf	inf	0.183748	0	1.98522	0	0	0	3.05079	0	2.90488	0	0	0	3	0	3	low
263	PC-5p-509587_5		ACTCACGTAGGTCTCACACTTTGG	up	inf	inf	0.183748	0	3.30871	0	0	0	5.08465	0	4.84146	0	0	0	5	0	5	low
264	PC-3p-372661_6		GATGTCACCCAACTCTATGTCACC	up	inf	inf	0.183748	0	3.97045	0	0	0	6.10158	0	5.80976	0	0	0	6	0	6	low
265	PC-5p-443489_5		GGGGCGACCTGAGAACACATGAGT	up	inf	inf	0.183748	0	3.30871	0	0	0	5.08465	0	4.84146	0	0	0	5	0	5	low
266	gma-MIR1509a-p5_2ss9GT17GA		TAATCAAGTAAATCACAGTC	up	inf	inf	0.18377	0	1.98739	0	0	0	0	3.05731	2.90488	0	0	0	0	3	3	low
267	PC-3p-207793_16		TGTCCCTCATCCTCATCCTTCC	up	inf	inf	0.18377	0	2.64986	0	0	0	0	4.07641	3.87317	0	0	0	0	4	4	low
268	PC-3p-246651_12		CATGAACAACAAAGAAATCTTGAC	up	inf	inf	0.18377	0	1.98739	0	0	0	0	3.05731	2.90488	0	0	0	0	3	3	low
269	PC-3p-272273_10		AAAGTGTGTTAGAATGTGTGTTGC	up	inf	inf	0.18377	0	3.31232	0	0	0	0	5.09551	4.84146	0	0	0	0	5	5	low
270	PC-3p-270615_10		AAGACGCGGGAGAACCTCATAGGG	up	inf	inf	0.18377	0	3.31232	0	0	0	0	5.09551	4.84146	0	0	0	0	5	5	low
271	PC-3p-222857_14		AGAGACATTGCCGACGAGAATACC	up	inf	inf	0.18377	0	4.63725	0	0	0	0	7.13371	6.77805	0	0	0	0	7	7	low
272	PC-3p-268950_10		ATGAGGGGCTAAAATTGCAACAGA	up	inf	inf	0.18377	0	3.31232	0	0	0	0	5.09551	4.84146	0	0	0	0	5	5	low
273	PC-3p-440017_5		AGGATCACTCTCCGTTAAGGACCC	up	inf	inf	0.18377	0	3.31232	0	0	0	0	5.09551	4.84146	0	0	0	0	5	5	low
274	gma-miR9749_L+1R-1_1ss21CT		TTTAGCTTCTTTCACCTTTCT	up	inf	inf	0.183803	0	3.14247	0	0	0	0	4.58596	4.84146	0	0	0	0	4.5	5	low
275	PC-3p-227158_14		TGGAGTGTTCAAATCCTTGTGTCC	up	inf	inf	0.183803	0	3.14247	0	0	0	0	4.58596	4.84146	0	0	0	0	4.5	5	low
276	mtr-MIR5284c-p5_1ss7CT		AGATTCTTCCACTTTTAGTCCCTC	down	-inf	-inf	0.183821	5.47923	0	0	8.448	7.98969	0	0	0	0	9	7	0	0	0	low
277	PC-5p-4657_892		TTCCAAATCATCTGTAGTCAAG	up	1.48161	0.567166	0.184291	44.3287	65.6779	48.083	45.5254	39.3778	45.2534	82.5473	69.2329	41	48.5	34.5	44.5	81	71.5	middle
278	PC-5p-91156_54		TGTCTTAATTTTCAATCCCAGC	up	inf	inf	0.184466	0	8.92634	0	0	0	0	12.7388	14.0402	0	0	0	0	12.5	14.5	middle
279	PC-3p-236369_13		AATGTGTGTCCCAGATGCAATGGC	up	inf	inf	0.184582	0	4.29755	0	0	0	0	6.11461	6.77805	0	0	0	0	6	7	low
280	PC-3p-111456_42		TAACTTCCATCAGAATTGCCCC	up	inf	inf	0.184812	0	12.2179	0	0	0	17.2878	0	19.3659	0	0	0	17	0	20	middle
281	PC-5p-123554_36		TAAACCTCGATGCCCTTGATGTGA	down	-inf	-inf	0.184838	8.87841	0	0	14.08	12.5552	0	0	0	0	15	11	0	0	0	middle
282	pla-miR11607_L-2_2ss7TA21CG		TCACACGGTTGTCTGACAGAC	up	inf	inf	0.185255	0	2.54486	0	0	0	4.06772	3.56686	0	0	0	0	4	3.5	0	low
283	mtr-miR5280_L-1R+1		AATTAGAAACGGGCCGTGATGGGT	up	inf	inf	0.185306	0	3.63147	0	0	0	5.08465	0	5.80976	0	0	0	5	0	6	low
284	PC-3p-267140_11		ACCAATAACCAAATCAAACAC	up	inf	inf	0.185306	0	1.81573	0	0	0	2.54233	0	2.90488	0	0	0	2.5	0	3	low
285	PC-3p-249058_12		AAACTCAGCGTGACTTAACTCATG	down	-inf	-inf	0.185517	2.04627	0	0	3.28534	2.85346	0	0	0	0	3.5	2.5	0	0	0	low
286	PC-3p-243473_12		TGACAAACTGACACGTGTCCCACC	down	-inf	-inf	0.185517	2.04627	0	0	3.28534	2.85346	0	0	0	0	3.5	2.5	0	0	0	low
287	PC-5p-310766_7		AAAAAGACGACGCTTGAGTGC	down	-inf	-inf	0.185517	4.09253	0	0	6.57067	5.70692	0	0	0	0	7	5	0	0	0	low
288	PC-3p-85323_58		TGTAACCCTCATCCACCACCT	down	-inf	-inf	0.186114	5.79058	0	9.38205	0	7.98969	0	0	0	8	0	7	0	0	0	low
289	mtr-MIR395g-p5		AGTTCCTCTGAACGCTTCATA	down	-inf	-inf	0.186129	2.89606	0	0	4.69334	3.99484	0	0	0	0	5	3.5	0	0	0	low
290	PC-5p-1566_2170		TTCACTGTTCATGACCGTTGAGAA	up	3.79615	1.92454	0.186562	68.0744	258.421	42.8056	63.8294	97.5883	219.149	113.12	442.994	36.5	68	85.5	215.5	111	457.5	middle
291	PC-5p-210660_16		TGAAAAAGTAATACTGCAAATC	up	inf	inf	0.186779	0	1.86618	0	0	0	3.05079	2.54776	0	0	0	0	3	2.5	0	low
292	ptc-miR394a-5p_R+1		TTGGCATTCTGTCCACCTCCT	down	-inf	-inf	0.186818	2.5096	0	4.10465	0	3.42415	0	0	0	3.5	0	3	0	0	0	low
293	mtr-MIR2620-p5_2ss7TA20TC		TGTGGAATATGATGTGACTCT	down	-inf	-inf	0.186818	2.5096	0	4.10465	0	3.42415	0	0	0	3.5	0	3	0	0	0	low
294	mtr-MIR2620-p3_2ss7TA20TC		TGTGGAATATGATGTGACTCT	down	-inf	-inf	0.186818	2.5096	0	4.10465	0	3.42415	0	0	0	3.5	0	3	0	0	0	low
295	mtr-MIR5269a-p3_1ss7TG		GAAATAGAACTCATACAAAGTGGT	up	inf	inf	0.186935	0	1.86654	0	0	0	2.54233	3.05731	0	0	0	0	2.5	3	0	low
296	PC-3p-253877_11		TTGACCTTTCCCATGTTAAATGCC	up	inf	inf	0.186935	0	1.86654	0	0	0	2.54233	3.05731	0	0	0	0	2.5	3	0	low
297	mtr-MIR169j-p3		GGCGAGGAATCTAGGCTCATA	down	-inf	-inf	0.187354	10.4003	0	0	14.08	17.1208	0	0	0	0	15	15	0	0	0	middle
298	PC-5p-251389_12		TGTCCCCTGGGCACTCTTTAAGCT	down	-inf	-inf	0.187354	2.08005	0	0	2.816	3.42415	0	0	0	0	3	3	0	0	0	low
299	PC-3p-243389_12		TAGGATAACAATGTTGCATAAG	down	-inf	-inf	0.187354	4.1601	0	0	5.632	6.84831	0	0	0	0	6	6	0	0	0	low
300	PC-3p-224995_14		ATAGCTACGAAGCACTGACACAGA	down	-inf	-inf	0.187354	2.42673	0	0	3.28534	3.99484	0	0	0	0	3.5	3.5	0	0	0	low
301	PC-3p-509999_5		AACACCTTCTCTCCCATCACCACC	down	-inf	-inf	0.187354	3.46675	0	0	4.69334	5.70692	0	0	0	0	5	5	0	0	0	low
302	PC-5p-141107_30		CTAAGGGCACATGTTAAGGAAGTC	up	inf	inf	0.187536	0	5.28278	0	0	0	0	7.13371	8.71463	0	0	0	0	7	9	low
303	PC-3p-164414_24		ATGACAGTATAAGCATAGAACAGT	up	inf	inf	0.187621	0	5.27772	0	0	0	7.11852	0	8.71463	0	0	0	7	0	9	low
304	PC-5p-237782_13		TCTTAGTTTTTTGGTCCCTCC	up	inf	inf	0.187742	0	2.15725	0	0	0	0	3.56686	2.90488	0	0	0	0	3.5	3	low
305	PC-3p-140814_30		TTTCATTTTTCCCCGGCAGTT	down	-inf	-inf	0.188476	1.75952	0	2.93189	2.34667	0	0	0	0	2.5	2.5	0	0	0	0	middle
306	PC-5p-96001_51		CTGCCGCGGAAAAATGAAACC	down	-inf	-inf	0.188476	3.16714	0	5.2774	4.224	0	0	0	0	4.5	4.5	0	0	0	0	middle
307	PC-3p-196209_18		CAAGGCAAGCAAGGTGATTCC	down	-inf	-inf	0.188476	6.33427	0	10.5548	8.448	0	0	0	0	9	9	0	0	0	0	middle
308	mtr-MIR2650-p5_2ss15AG23AG		TTTTGCGTGACTTTGAAGAATAGT	up	inf	inf	0.188864	0	3.64768	0	0	0	6.10158	0	4.84146	0	0	0	6	0	5	low
309	ath-MIR857-p5_2ss9TG18AT		TGGAGAAAGAAAGAAACT	up	inf	inf	0.188864	0	1.82384	0	0	0	3.05079	0	2.42073	0	0	0	3	0	2.5	low
310	PC-3p-267784_11		ATCGGGGACTAATTTGAGAGTGAC	up	inf	inf	0.188864	0	3.64768	0	0	0	6.10158	0	4.84146	0	0	0	6	0	5	low
311	PC-3p-260989_11		AAACTGCAAACCGAACCGAACAGC	up	inf	inf	0.188864	0	3.64768	0	0	0	6.10158	0	4.84146	0	0	0	6	0	5	low
312	PC-3p-374674_6		AAGAAAGTGATTGTTAGAGAGAGT	up	inf	inf	0.188961	0	3.65203	0	0	0	0	6.11461	4.84146	0	0	0	0	6	5	low
313	PC-5p-169076_23		ACGACCTGTAGACAGAGATGC	up	inf	inf	0.189202	0	4.61598	0	0	0	6.10158	0	7.74634	0	0	0	6	0	8	low
314	PC-5p-143172_30		TATTGGATGGAATCAATGTGG	up	inf	inf	0.189833	0	3.32079	0	0	0	0	5.60506	4.35732	0	0	0	0	5.5	4.5	low
315	PC-5p-140707_30		CAAATTCTGGGCAACTCGCATC	down	-inf	-inf	0.19027	2.6946	0	3.51827	0	4.56554	0	0	0	3	0	4	0	0	0	low
316	mtr-MIR5230-p3_1ss4CT		AAATATTGGGGAATCTCTTGC	down	0.751227	-0.412679	0.190826	100.758	75.6922	91.475	112.64	98.159	66.1005	101.91	59.0658	78	120	86	65	100	61	middle
317	PC-5p-57978_89		CAATGACTATATCAACAACTATCT	down	-inf	-inf	0.190992	2.20271	0	0	3.75467	2.85346	0	0	0	0	4	2.5	0	0	0	middle
318	mtr-miR5037a		AACCCTCAAAGGCTTCCACGG	down	0.475319	-1.07303	0.19145	12.0709	5.73754	12.9003	13.6107	9.70177	5.59312	0	11.6195	11	14.5	8.5	5.5	0	12	middle
319	PC-3p-243507_12		TGGCTGCACTTTTCCAACTTT	up	inf	inf	0.19158	0	1.97893	0	0	0	0	2.54776	3.38902	0	0	0	0	2.5	3.5	low
320	PC-5p-168988_23		ACATTGTGGTTGGTGACATTGGCT	up	inf	inf	0.191697	0	3.95423	0	0	0	5.08465	0	6.77805	0	0	0	5	0	7	low
321	PC-5p-184941_20		ACACGTGAGACTCATTTAAGAACC	down	-inf	-inf	0.191737	4.1058	0	5.2774	7.04	0	0	0	0	4.5	7.5	0	0	0	0	low
322	mtr-miR5754		TATTGCACTCATCTTCCATGGC	up	2.76733	1.46849	0.191878	45.6766	126.402	53.9468	75.0934	7.98969	110.845	61.1461	207.215	46	80	7	109	60	214	middle
323	PC-3p-147157_28		AAGTGGATGACTTGGCAACTT	up	inf	inf	0.192726	0	5.60555	0	0	0	0	7.13371	9.68293	0	0	0	0	7	10	middle
324	PC-3p-1254_2591		TGCCATATGGTGTCTGGGACTT	up	1.71844	0.781103	0.193067	119.279	204.974	155.977	119.68	82.1797	235.419	115.159	264.344	133	127.5	72	231.5	113	273	middle
325	PC-3p-104706_45		TCCTGAAAGAGTTGTGAGATG	up	inf	inf	0.193093	0	6.42939	0	0	0	0	8.15282	11.1354	0	0	0	0	8	11.5	middle
326	mtr-miR530		TGCATTTGCACCTGCACTTTC	up	1.48724	0.572635	0.193153	1683.21	2503.33	1498.2	1722.92	1828.5	2140.64	3363.04	2006.3	1277.5	1835.5	1602	2105	3300	2072	high
327	PC-3p-125253_36		AATGTCACCTAACTCTATGTCACC	down	-inf	-inf	0.193186	5.92726	0	0	7.50934	10.2725	0	0	0	0	8	9	0	0	0	middle
328	gma-miR166m_L+1_1ss17TC		TCGGACCAGGCTTCATCCCCC	down	0.842973	-0.246441	0.193551	83.1778	70.1167	78.5747	83.072	87.8866	72.2021	81.0186	57.1293	67	88.5	77	71	79.5	59	middle
329	PC-5p-93024_53		TGAGGGGGAGAAATCACAGTT	down	0.51589	-0.954865	0.193756	6.09137	3.14247	7.03654	6.10134	5.13623	0	4.58596	4.84146	6	6.5	4.5	0	4.5	5	low
330	PC-3p-91_23486		CGACCCGAGGCTTATGCGATC	down	0.715019	-0.483946	0.193831	1155.56	826.25	1050.79	1368.11	1047.79	485.076	950.822	1042.85	896	1457.5	918	477	933	1077	high
331	PC-3p-204428_17		ACAGTTTTGGACTGTCGACCCACC	up	inf	inf	0.194749	0	2.03639	0	0	0	2.54233	3.56686	0	0	0	0	2.5	3.5	0	low
332	PC-5p-56446_91		TCATCTTATTTTCGACATTGCT	up	3.23673	1.69454	0.195193	3.36298	10.8851	3.51827	6.57067	0	4.57619	9.68147	18.3976	3	7	0	4.5	9.5	19	middle
333	gma-miR1514a-5p_R+1_1ss8TC		TTCATTTCTAAAATAGGCATTG	up	1.2242	0.291838	0.195681	304.155	372.347	280.289	375.936	256.241	369.146	405.603	342.291	239	400.5	224.5	363	398	353.5	middle
334	PC-3p-182215_20		ATAATTGTTGATATAGTCATTGCT	up	inf	inf	0.195913	0	3.29249	0	0	0	4.06772	0	5.80976	0	0	0	4	0	6	low
335	PC-3p-213906_15		TTCCCCAGTAGCTATTTGGCAT	up	inf	inf	0.195913	0	2.46937	0	0	0	3.05079	0	4.35732	0	0	0	3	0	4.5	low
336	PC-5p-366061_6		ATGAGATAACCAATGGAGAACAAG	down	-inf	-inf	0.197374	1.92361	0	0	2.34667	3.42415	0	0	0	0	2.5	3	0	0	0	low
337	PC-5p-243877_12		TGACATTGTGACATTGGCCAACCA	up	inf	inf	0.197911	0	3.98666	0	0	0	7.11852	0	4.84146	0	0	0	7	0	5	low
338	PC-5p-203263_17		ATTTAATGGAGGAGATTTGGTGTC	up	inf	inf	0.197911	0	3.98666	0	0	0	7.11852	0	4.84146	0	0	0	7	0	5	low
339	PC-3p-307653_7		TAGGAACAATGGTACCAATGGCAC	up	inf	inf	0.198063	0	3.99173	0	0	0	0	7.13371	4.84146	0	0	0	0	7	5	low
340	PC-3p-102963_46		AATAAGAGGTCGCTTTCTCGC	up	inf	inf	0.198283	0	7.57601	0	0	0	0	9.17192	13.5561	0	0	0	0	9	14	middle
341	PC-3p-46715_110		TCCAACTATTCACCAAGTAAA	up	inf	inf	0.198669	0	24.4375	0	0	0	29.491	43.8214	0	0	0	0	29	43	0	middle
342	PC-5p-21745_228		AGTTCGGACACTATATGGCATG	up	1.80731	0.853848	0.199336	11.2626	20.355	9.96843	11.264	12.5552	16.2709	14.777	30.0171	8.5	12	11	16	14.5	31	middle
343	PC-3p-151317_27		TTACTCAATGAACATAAAAGG	up	inf	inf	0.199517	0	2.54558	0	0	0	3.05079	4.58596	0	0	0	0	3	4.5	0	low
344	mtr-MIR5230-p5_1ss5CG_1		TAGAGAAATGTGGAGGGTTGC	down	0.675671	-0.565608	0.199598	26.6245	17.9894	21.696	23.936	34.2415	10.1693	23.9489	19.85	18.5	25.5	30	10	23.5	20.5	middle
345	mtr-MIR5230-p5_1ss5CG_2		TAGAGAAATGTGGAGGGTTGCC	down	0.675671	-0.565608	0.199598	26.6245	17.9894	21.696	23.936	34.2415	10.1693	23.9489	19.85	18.5	25.5	30	10	23.5	20.5	middle
346	PC-3p-193196_18		ATACAACTTGGTGAAGAAGGAAGA	down	-inf	-inf	0.200348	3.15386	0	0	3.75467	5.70692	0	0	0	0	4	5	0	0	0	low
347	PC-3p-150417_28		CTCAGACCGAGAAAATGATTCAAC	down	-inf	-inf	0.200348	4.73079	0	0	5.632	8.56038	0	0	0	0	6	7.5	0	0	0	low
348	mtr-miR2629a_R+3_1ss13TA		AGTTTTCCTCGGAAGTTAACTGCC	up	inf	inf	0.200362	0	2.14031	0	0	0	0	2.54776	3.87317	0	0	0	0	2.5	4	low
349	PC-3p-197254_18		TAGGGGGTTAAAATTGGCATG	up	inf	inf	0.200362	0	2.14031	0	0	0	0	2.54776	3.87317	0	0	0	0	2.5	4	low
350	PC-5p-5089_832		TATGCAATGAGGTACATCAAT	up	1.69668	0.762715	0.20135	48.0046	81.4484	41.6329	54.4427	47.9381	46.7788	107.515	90.0512	35.5	58	42	46	105.5	93	middle
351	PC-5p-88756_56		TATTTATACTCTCTTTTCGTT	up	5.74686	2.52277	0.202108	3.75467	21.5776	0	11.264	0	15.254	40.7641	8.71463	0	12	0	15	40	9	middle
352	PC-3p-181068_20		ATGCTATTACACTGTGCAACA	down	-inf	-inf	0.202222	2.49914	0	2.93189	0	4.56554	0	0	0	2.5	0	4	0	0	0	low
353	gma-miR166a-5p_R+1_1ss9GT		GGAATGTTTTCTGGCTCGAGGT	up	2.26122	1.1771	0.202381	53.5743	121.143	86.784	11.7333	62.2054	70.1682	191.591	101.671	74	12.5	54.5	69	188	105	middle
354	mtr-miR2119		TCAAAGGGAGGTGTGGAGTAG	up	9.76003	3.28689	0.202463	12.1185	118.277	36.3554	0	0	201.352	145.732	7.74634	31	0	0	198	143	8	middle
355	PC-3p-64188_80		ACTGTGTTTTCCTTGATTAAA	down	0.250242	-1.9986	0.203082	7.45028	1.86437	2.93189	13.1413	6.27761	5.59312	0	0	2.5	14	5.5	5.5	0	0	middle
356	gma-miR172h-5p		GCAGCAGCATCAAGATTCACA	up	1.49345	0.578651	0.203363	134.59	201.003	174.741	136.576	92.4521	205.928	137.579	259.502	149	145.5	81	202.5	135	268	middle
357	PC-3p-120812_38		CATCGGTGACTTTAGTGGATTTTG	down	-inf	-inf	0.203423	4.03744	0	0	4.69334	7.419	0	0	0	0	5	6.5	0	0	0	low
358	PC-5p-13087_366		TGTTTGATTTGGTTATTGGTT	down	0.585789	-0.771547	0.203831	27.0364	15.8376	35.1827	22.528	23.3984	13.7286	27.0062	6.77805	30	24	20.5	13.5	26.5	7	middle
359	PC-5p-198800_18		CAAAAGTCTGTATTTACCCATT	down	-inf	-inf	0.204454	6.10018	0	7.03654	11.264	0	0	0	0	6	12	0	0	0	0	middle
360	PC-5p-176793_21		CACAATTGGTAAGTTGGCGCCTCC	down	-inf	-inf	0.204454	7.11688	0	8.2093	13.1413	0	0	0	0	7	14	0	0	0	0	middle
361	PC-5p-118838_38		TCTAATCTCTGATCCCAAATAT	up	4.65762	2.21959	0.204508	0.938667	4.37196	0	2.816	0	2.54233	8.15282	2.42073	0	3	0	2.5	8	2.5	low
362	PC-3p-42843_120		GATACATCAGTTACTCAAGGAATC	down	0.354749	-1.49513	0.204658	12.8998	4.57619	10.5548	15.0187	13.1259	13.7286	0	0	9	16	11.5	13.5	0	0	middle
363	vvi-miR167c		TGAAGCTGCCAGCATGATCTC	up	1.59652	0.674928	0.205457	27.7337	44.2773	32.2508	30.976	19.9742	30.5079	61.6557	40.6683	27.5	33	17.5	30	60.5	42	middle
364	PC-3p-179457_21		TTGGCCCATTGAGAGGTCCCTGCC	down	-inf	-inf	0.205514	3.69077	0	0	4.224	6.84831	0	0	0	0	4.5	6	0	0	0	low
365	PC-3p-125224_36		TGGTGCCATCCTCTTGCGACAGT	up	inf	inf	0.205887	0	3.56396	0	0	0	4.06772	6.62416	0	0	0	0	4	6.5	0	low
366	PC-3p-149812_28		GCATTTCCGTGGGGATAACTG	up	inf	inf	0.205905	0	9.37661	0	0	0	0	10.7006	17.4293	0	0	0	0	10.5	18	middle
367	PC-3p-215188_15		CAATGAATCACGGTCTTAACAAGC	down	-inf	-inf	0.206737	2.5156	0	0	4.69334	2.85346	0	0	0	0	5	2.5	0	0	0	low
368	PC-3p-48947_105		TAGGCATGTTAGCACCAAACA	down	0.229269	-2.12489	0.207666	10.9199	2.5036	7.62292	5.16267	19.9742	2.54233	2.54776	2.42073	6.5	5.5	17.5	2.5	2.5	2.5	middle
369	PC-5p-1562_2177		TTGATAATATTACACCAGCAGC	up	2.65805	1.41037	0.207666	77.0092	204.694	75.6428	81.1947	74.19	96.6084	182.929	334.545	64.5	86.5	65	95	179.5	345.5	middle
370	PC-5p-169301_23		TGAGGGACACGTGTCATTTTG	down	-inf	-inf	0.207839	2.50234	0	4.69103	2.816	0	0	0	0	4	3	0	0	0	0	low
371	stu-MIR166d-p5_1ss3TC		AACGTCGTCTGGTTCGAGATC	up	1.82888	0.870957	0.208312	36.5282	66.8055	45.7375	26.752	37.095	46.7788	100.382	53.2561	39	28.5	32.5	46	98.5	55	middle
372	mtr-MIR2586a-p5_2ss14CT21GA		CGGACACCGGACATGACACAAACA	up	inf	inf	0.208601	0	2.16282	0	0	0	4.06772	0	2.42073	0	0	0	4	0	2.5	low
373	mtr-MIR2586a-p3_2ss14CT21GA		CGGACACCGGACATGACACAAACA	up	inf	inf	0.208601	0	2.16282	0	0	0	4.06772	0	2.42073	0	0	0	4	0	2.5	low
374	mes-MIR396f-p3		GTTCAAGAAAGCTGTGGGAGA	up	inf	inf	0.20879	0	2.16571	0	0	0	0	4.07641	2.42073	0	0	0	0	4	2.5	low
375	PC-5p-234121_13		AAAGCATGTGGGTACAAAGAATCC	up	inf	inf	0.20879	0	4.33143	0	0	0	0	8.15282	4.84146	0	0	0	0	8	5	low
376	PC-5p-14819_326		GTTCGGACACTATATGGCATG	up	2.31129	1.2087	0.210564	20.2862	46.8874	23.4551	19.712	17.6915	28.9825	35.6686	76.011	20	21	15.5	28.5	35	78.5	middle
377	mtr-MIR5275-p5_1ss1GA		AATGGTTTGTAGACAACTTGC	up	inf	inf	0.211023	0	6.22386	0	0	0	2.54233	3.05731	13.072	0	0	0	2.5	3	13.5	middle
378	mtr-MIR5275-p3_1ss1GA		AATGGTTTGTAGACAACTTGC	up	inf	inf	0.211023	0	6.22386	0	0	0	2.54233	3.05731	13.072	0	0	0	2.5	3	13.5	middle
379	PC-5p-13964_344		AATTGGGCCTTTGCTAAGTGGATA	up	2.49692	1.32015	0.211347	38.1883	95.3532	37.5282	29.0987	47.9381	59.9989	67.2607	158.8	32	31	42	59	66	164	middle
380	gma-miR319f_R+1		TTGGACTGAAGGGGCCTCTTC	up	3.77096	1.91493	0.211992	3.66667	13.8269	5.86378	0	5.13623	23.3894	3.56686	14.5244	5	0	4.5	23	3.5	15	middle
381	ptc-miR168a-3p_R+1		CCCGCCTTGCATCAACTGAATT	down	0.825655	-0.276388	0.21221	238.133	196.616	245.692	194.773	273.932	207.454	211.973	170.419	209.5	207.5	240	204	208	176	middle
382	nta-MIR168a-p3		CCCGCCTTGCATCAACTGAATT	down	0.825655	-0.276388	0.21221	238.133	196.616	245.692	194.773	273.932	207.454	211.973	170.419	209.5	207.5	240	204	208	176	middle
383	ath-miR159c_R+1_2ss19CT20CA		TTTGGATTGAAGGGAGCTTATT	down	-inf	-inf	0.212228	2.15044	0	4.10465	2.34667	0	0	0	0	3.5	2.5	0	0	0	0	low
384	PC-3p-166658_23		CATCGAACTTTTCTGCGGAAA	down	-inf	-inf	0.212228	4.30088	0	8.2093	4.69334	0	0	0	0	7	5	0	0	0	0	low
385	PC-5p-94008_52		AACTACCGAAGTAAGGAACCGACT	up	1.95835	0.969639	0.212598	3.90996	7.65707	7.03654	4.69334	0	5.08465	9.17192	8.71463	6	5	0	5	9	9	middle
386	mtr-miR2614_L+4_1ss8TC		AGTTCGGCTCGACTCGTTAGGTTC	up	2.82285	1.49715	0.212786	1.17276	3.31052	3.51827	0	0	2.54233	2.54776	4.84146	3	0	0	2.5	2.5	5	low
387	gma-miR159d		AGCTGCTTAGCTATGGATCCC	down	0.77099	-0.375217	0.212832	166.605	128.451	178.259	130.944	190.611	102.202	163.566	119.584	152	139.5	167	100.5	160.5	123.5	middle
388	mtr-MIR2654-p3_2ss17TC22GA		AAATTCAGGGACAAAGCGTGCATT	down	-inf	-inf	0.212848	2.69819	0	2.93189	5.16267	0	0	0	0	2.5	5.5	0	0	0	0	low
389	vvi-miR3630-3p_L-3		GGGAATCTCTCTGATGCAC	up	3.42469	1.77597	0.213645	3.28534	11.2513	0	9.85601	0	3.05079	13.7579	16.9451	0	10.5	0	3	13.5	17.5	middle
390	mtr-miR398a-3p		TGTGTTCTCAGGTCACCCCTT	up	5.93861	2.57013	0.214	35.9649	213.582	105.548	2.34667	0	247.623	368.915	24.2073	90	2.5	0	243.5	362	25	middle
391	PC-5p-169753_23		TTTGCCTCCCTTGAGAATCGAACC	down	-inf	-inf	0.214041	13.0635	0	0	14.08	25.1105	0	0	0	0	15	22	0	0	0	middle
392	PC-3p-155376_26		ACAAATAGAATTCTGAATTCGATA	up	inf	inf	0.214716	0	2.37465	0	0	0	4.57619	2.54776	0	0	0	0	4.5	2.5	0	low
393	mtr-MIR2610a-p3_2ss15TC22AC		AAAACTCCTTTCGTCCTGCCCC	up	1.91445	0.936931	0.214952	61.014	116.808	63.3288	95.744	23.9691	171.861	66.2416	112.322	54	102	21	169	65	116	middle
394	mtr-miR166g-5p		GGAATGTTGTCTGGCTCGAGG	up	1.30569	0.384811	0.215021	23264.5	30376.3	25749	17177	26867.6	23486.5	36150.8	31491.5	21956	18299.3	23539.5	23095.5	35473.2	32522.7	high
395	peu-MIR2916-p3		TCAACCATAAACGATGCCGACC	up	1.51116	0.595655	0.215099	608.389	919.373	447.993	636.416	740.758	963.033	1201.52	593.563	382	678	649	947	1179	613	high
396	PC-3p-18149_270		AATTGTGCTTGCGATCGGGATGCA	down	0.682358	-0.551398	0.215313	25.8145	17.6147	17.5913	26.752	33.1001	11.6947	19.3629	21.7866	15	28.5	29	11.5	19	22.5	middle
397	gma-miR166a-5p_R+1_1		GGAATGTTGTCTGGCTCGAGGC	up	4.5773	2.1945	0.215454	8.97136	41.0646	7.62292	8.448	10.8431	10.1693	72.3562	40.6683	6.5	9	9.5	10	71	42	middle
398	gma-miR166a-5p_R+1_2		GGAATGTTGTCTGGCTCGAGGT	up	4.5773	2.1945	0.215454	8.97136	41.0646	7.62292	8.448	10.8431	10.1693	72.3562	40.6683	6.5	9	9.5	10	71	42	middle
399	mtr-MIR5272a-p3_2ss10AT18TA		AAGTGATTCTTATGAGTAGATGTT	down	-inf	-inf	0.216185	3.53432	0	0	3.75467	6.84831	0	0	0	0	4	6	0	0	0	low
400	mtr-MIR5272e-p3_2ss16AG18TA		AAGTGATTCTTATGAGTAGATGTT	down	-inf	-inf	0.216185	3.53432	0	0	3.75467	6.84831	0	0	0	0	4	6	0	0	0	low
401	ptc-miR164a_R+1_1		TGGAGAAGCAGGGCACGTGCAC	up	3.92352	1.97215	0.216292	4.69459	18.4193	3.51827	6.57067	3.99484	3.05079	27.5158	24.6915	3	7	3.5	3	27	25.5	middle
402	ptc-miR164a_R+1_2		TGGAGAAGCAGGGCACGTGCAT	up	3.92352	1.97215	0.216292	4.69459	18.4193	3.51827	6.57067	3.99484	3.05079	27.5158	24.6915	3	7	3.5	3	27	25.5	middle
403	PC-5p-114473_40		TGGAAAGCTTCGGCTCTGATT	down	-inf	-inf	0.216328	9.67885	0	18.7641	0	10.2725	0	0	0	16	0	9	0	0	0	middle
404	PC-5p-201564_17		TTCGGTTGGTTTTATGCTTCTT	up	inf	inf	0.216475	0	5.76695	0	0	0	11.1862	6.11461	0	0	0	0	11	6	0	middle
405	PC-3p-180303_21		TTGACTCAATATTGGCACATG	down	-inf	-inf	0.216747	14.0198	0	0	27.2213	14.838	0	0	0	0	29	13	0	0	0	middle
406	PC-3p-7924_570		AATAAGCTGACGTTAGAGACTAAA	down	0.636972	-0.650698	0.2185	100.059	63.7345	94.4069	133.291	72.4779	33.0502	64.713	93.4402	80.5	142	63.5	32.5	63.5	96.5	middle
407	PC-3p-215830_15		ATGAACAACAAAGAAATCTTGACA	down	-inf	-inf	0.21883	2.6978	0	5.2774	2.816	0	0	0	0	4.5	3	0	0	0	0	low
408	PC-3p-96518_50		AAGAGAATGAGTGTTGAAGAGAGT	up	2.73242	1.45018	0.218892	1.52185	4.15832	0	0	4.56554	4.57619	3.05731	4.84146	0	0	4	4.5	3	5	low
409	PC-5p-3366_1160		TTATGACCCAAATCCTGAACC	down	0.554511	-0.850713	0.219469	167.47	92.8639	223.41	98.0907	180.909	147.455	105.477	25.6598	190.5	104.5	158.5	145	103.5	26.5	middle
410	mtr-miR171e-5p		CGATGTTGGTGAGGTTCAATC	up	1.13931	0.188166	0.21979	62.3157	70.9971	64.5016	61.952	60.4934	77.2867	61.1461	74.5585	55	66	53	76	60	77	middle
411	PC-3p-154869_26		AACGGTCTTTACGGATGTTGCACC	up	inf	inf	0.219902	0	2.33556	0	0	0	0	4.58596	2.42073	0	0	0	0	4.5	2.5	low
412	cas-miR156k-3p_L-1R+1		GCTTACTCTCTATCTGTCACCT	up	2.44353	1.28897	0.220055	44.3041	108.258	35.7691	54.912	42.2312	48.8127	174.776	101.187	30.5	58.5	37	48	171.5	104.5	middle
413	mtr-MIR5292b-p5_1ss24AC		TTTTGAATCGTTTCAAACAAGTCC	up	3.45338	1.78801	0.220096	2.03378	7.02341	0	6.10134	0	12.2032	3.05731	5.80976	0	6.5	0	12	3	6	middle
414	mtr-MIR2592bb-p3_2ss22TG24CT		AGACAATTGTTGTAGTTGGAAGGT	up	inf	inf	0.220208	0	0.985229	0	0	0	0	1.0191	1.93659	0	0	0	0	1	2	low
415	PC-3p-177489_21		AATGCCTTAAGGACACTCGTTAGC	up	inf	inf	0.220208	0	3.4483	0	0	0	0	3.56686	6.77805	0	0	0	0	3.5	7	low
416	PC-5p-485977_5		TTACACTTGTCTTGTTGCATGCATT	up	inf	inf	0.220208	0	2.46307	0	0	0	0	2.54776	4.84146	0	0	0	0	2.5	5	low
417	mtr-MIR5234-p5_2ss12TC21CT		AAAAGATGTTTCGCCTATTGT	up	3.43827	1.78168	0.220471	2.34551	8.06452	7.03654	0	0	5.08465	14.2674	4.84146	6	0	0	5	14	5	middle
418	mtr-MIR398c-p5		GGGCCGACCCGAGACCACATG	down	0.51261	-0.964066	0.220562	27.9585	14.3318	37.5282	33.792	12.5552	6.10158	21.4011	15.4927	32	36	11	6	21	16	middle
419	PC-5p-172125_22		CAGTACATTGTTCTGGCCACC	up	2.89707	1.5346	0.221496	1.56368	4.53008	4.69103	0	0	7.11852	3.56686	2.90488	4	0	0	7	3.5	3	low
420	mtr-MIR393b-p3		ATCATGCTATCCCTTTGGATT	down	0.658129	-0.603557	0.221693	79.9544	52.6204	110.239	65.7067	63.9175	73.219	46.8787	37.7634	94	70	56	72	46	39	middle
421	eun-miR167a-5p_R+1		TGAAGCTGCCAGCATGATCTGAC	up	1.99638	0.997383	0.222633	30.3032	60.4966	29.3189	31.9147	29.676	33.5587	92.7383	55.1927	25	34	26	33	91	57	middle
422	mtr-miR5558-5p_1ss17CT		TTTTCCAATTCTAAGTTTATC	up	7.18783	2.84556	0.222775	0.782223	5.62248	0	2.34667	0	0	8.15282	8.71463	0	2.5	0	0	8	9	low
423	stu-miR482a-3p		TTTCCAATTCCACCCATTCCTA	down	0.747913	-0.419058	0.223028	2212.29	1654.6	1949.12	2446.64	2241.11	2129.96	1031.84	1801.99	1662	2606.5	1963.5	2094.5	1012.5	1861	high
424	PC-5p-45301_114		TTAATCAAAGGAATTACGGTC	up	1.3807	0.465398	0.223165	10.381	14.333	8.79567	7.50934	14.838	16.2709	11.7197	15.0085	7.5	8	13	16	11.5	15.5	middle
425	mtr-miR5277		AGGTTGTTTCTTGAAGTGCAAGGC	up	1.70419	0.769085	0.223358	897.088	1528.81	843.212	1204.31	643.741	967.101	1395.15	2224.17	719	1283	564	951	1369	2297	high
426	PC-5p-22513_220		TTAATCAAAGGAATTACGGTCA	up	2.59787	1.37733	0.223758	13.8084	35.8723	10.5548	10.3253	20.5449	61.5243	21.4011	24.6915	9	11	18	60.5	21	25.5	middle
427	PC-5p-94528_52		TTGGAAGTAGGTCAGAGGAAATTC	down	-inf	-inf	0.224704	8.52178	0	17.005	0	8.56038	0	0	0	14.5	0	7.5	0	0	0	middle
428	gma-miR6300_R+5		GTCGTTGTAGTATAGTGGTAAGT	up	1.2844	0.36109	0.22506	1005.75	1291.78	869.013	818.518	1329.71	1496.92	1151.59	1226.83	741	872	1165	1472	1130	1267	high
429	lja-miR1511-3p_L+1R-3		CAACCAGGCTCTGATACCATGA	up	inf	inf	0.225183	0	2.54414	0	0	0	5.08465	2.54776	0	0	0	0	5	2.5	0	low
430	PC-3p-128820_34		TGTCAGTGTCGTGTTGGTGCC	up	inf	inf	0.225624	0	5.09189	0	0	0	5.08465	10.191	0	0	0	0	5	10	0	middle
431	hex-MIR390a-p5_1ss21GT		TAAGAAGAATAAGCTCAGGAT	down	0.7449	-0.424882	0.225875	196.141	146.105	219.305	209.323	159.794	190.166	92.7383	155.411	187	223	140	187	91	160.5	middle
432	hex-MIR390b-p5_1ss21GT		TAAGAAGAATAAGCTCAGGAT	down	0.7449	-0.424882	0.225875	196.141	146.105	219.305	209.323	159.794	190.166	92.7383	155.411	187	223	140	187	91	160.5	middle
433	mtr-MIR2590c-p3_2ss5GA20AG		AAATAAGACTGAAATCTAAGGGTG	up	2.8013	1.4861	0.226768	2.50311	7.01197	0	7.50934	0	10.4235	4.07641	6.53598	0	8	0	10.25	4	6.75	middle
434	mtr-miR2590g_2ss5GA20AG		AAATAAGACTGAAATCTAAGGGTG	up	2.8013	1.4861	0.226768	2.50311	7.01197	0	7.50934	0	10.4235	4.07641	6.53598	0	8	0	10.25	4	6.75	middle
435	PC-3p-22690_219		ACAGAGGACCAAAATCATAGATAT	down	0.572777	-0.803956	0.227083	27.9078	15.9849	22.8688	30.0373	30.8174	9.66084	30.0635	8.23049	19.5	32	27	9.5	29.5	8.5	middle
436	mtr-MIR5298c-p3_1ss3TG		AAGGTTGATGGAGATGATATGAAG	down	0.258939	-1.94932	0.227157	14.2044	3.67808	1.95459	20.4942	20.1645	3.05079	4.75581	3.22764	1.66667	21.8333	17.6667	3	4.66667	3.33333	middle
437	mtr-MIR5298b-p3_1ss4AG		AAGGTTGATGGAGATGATATGAAG	down	0.258939	-1.94932	0.227157	14.2044	3.67808	1.95459	20.4942	20.1645	3.05079	4.75581	3.22764	1.66667	21.8333	17.6667	3	4.66667	3.33333	middle
438	mtr-MIR5298d-p3_1ss3AG		AAGGTTGATGGAGATGATATGAAG	down	0.258939	-1.94932	0.227157	14.2044	3.67808	1.95459	20.4942	20.1645	3.05079	4.75581	3.22764	1.66667	21.8333	17.6667	3	4.66667	3.33333	middle
439	PC-3p-145717_29		TGTTTCGTCGTCGGTACCGGATCC	up	inf	inf	0.227479	0	7.2143	0	0	0	7.11852	0	14.5244	0	0	0	7	0	15	middle
440	PC-3p-170339_23		AGGGACCTTGCATGTATCT	down	0.43016	-1.21705	0.227511	8.79846	3.78475	10.5548	3.28534	12.5552	4.57619	0	6.77805	9	3.5	11	4.5	0	7	middle
441	PC-3p-25382_197		TCGGACCATGCTTCGTTCC	up	1.97651	0.982956	0.228359	10.9594	21.6613	15.8322	5.632	11.4138	17.2878	34.1399	13.5561	13.5	6	10	17	33.5	14	middle
442	mtr-MIR5275-p5_2ss3AG19TC		CAGAAATCCAAGCATGTGCCT	up	inf	inf	0.228773	0	29.126	0	0	0	9.15238	15.2865	62.939	0	0	0	9	15	65	middle
443	PC-3p-127366_35		TATCTCCCCTCCTGCGTAGC	up	inf	inf	0.230021	0	2.62445	0	0	0	0	2.54776	5.32561	0	0	0	0	2.5	5.5	low
444	ath-miR8175_L+5_1ss7AT		GGTTCGTTCCCCGGCAACGGCGCCA	down	0.541194	-0.885781	0.230234	3.44827	1.86618	4.10465	2.816	3.42415	3.05079	2.54776	0	3.5	3	3	3	2.5	0	low
445	PC-3p-275376_10		TTGATAGATATGGATTAGAGG	up	inf	inf	0.23076	0	2.50541	0	0	0	0	5.09551	2.42073	0	0	0	0	5	2.5	low
446	PC-3p-217788_15		ATGCTTAAAGAGTGCTCTGGAGGT	up	inf	inf	0.23076	0	5.01083	0	0	0	0	10.191	4.84146	0	0	0	0	10	5	middle
447	mtr-MIR5248-p3_2ss7GC19AG		TTGCCGCTAGCTCTTGAAGTC	down	-inf	-inf	0.23095	7.29151	0	7.03654	0	14.838	0	0	0	6	0	13	0	0	0	middle
448	mtr-MIR2619a-p5_2ss20AG23TC		TTGGATCTTTGACAGTTTTGGCCC	up	2.67189	1.41786	0.231603	2.50311	6.68805	0	7.50934	0	6.10158	8.15282	5.80976	0	8	0	6	8	6	low
449	csi-miR160c-5p_1ss19CT		TGCCTGGCTCCCTGTATGTTT	up	1.90197	0.927497	0.231648	27.1948	51.7239	34.0099	20.1813	27.3932	32.5418	80.5091	42.1207	29	21.5	24	32	79	43.5	middle
450	mtr-miR530_R+1		TGCATTTGCACCTGCACTTTCT	up	1.83528	0.876002	0.231913	7.4684	13.7066	11.1412	11.264	0	13.2201	15.7961	12.1037	9.5	12	0	13	15.5	12.5	middle
451	ath-MIR8176-p3_1ss17TC		TGCTTACCGAGTTTCTCACATTT	up	2.6693	1.41646	0.232042	1.56445	4.17598	0	4.69334	0	3.55926	5.09551	3.87317	0	5	0	3.5	5	4	low
452	PC-5p-314387_7		TCTTCGAAACACATAGAAATGACC	down	-inf	-inf	0.232431	2.98493	0	0	6.10134	2.85346	0	0	0	0	6.5	2.5	0	0	0	low
453	PC-3p-114011_41		AACTTAGCCACTAAGTAAACTTGG	down	-inf	-inf	0.234648	6.84339	0	6.45016	14.08	0	0	0	0	5.5	15	0	0	0	0	middle
454	ptc-miR167e_R+2		TGAAGCTGCCAGCATGATCTGAT	down	0.768814	-0.379293	0.234852	123.411	94.8798	138.385	89.1734	142.673	99.6592	97.8338	87.1463	118	95	125	98	96	90	middle
455	mtr-MIR2638a-p3_1ss16TC		CTTAAATAGGTCTTTCGTCCC	up	inf	inf	0.23526	0	5.42725	0	0	0	11.1862	5.09551	0	0	0	0	11	5	0	middle
456	PC-3p-6041_722		ATGAGTTATTTCCACAACAAC	down	0.656392	-0.607371	0.235924	47.2928	31.0426	46.3239	38.4854	57.0692	21.864	50.4456	20.8183	39.5	41	50	21.5	49.5	21.5	middle
457	mtr-miR2111a-3p		AGCCTTGGAATGCAGATTATC	up	3.08831	1.62682	0.236175	18.6983	57.7463	24.0415	28.6293	3.42415	30.5079	104.968	37.7634	20.5	30.5	3	30	103	39	middle
458	mtr-MIR156j-p3_1ss8AG_1		TGCTCATGCTCTTCTGACAAT	up	1.27409	0.349464	0.237051	31.8243	40.5469	34.0099	27.2213	34.2415	44.745	46.8787	30.0171	29	29	30	44	46	31	middle
459	mtr-MIR156j-p3_1ss8AG_2		TGCTCATGCTCTTCTGACAATT	up	1.27409	0.349464	0.237051	31.8243	40.5469	34.0099	27.2213	34.2415	44.745	46.8787	30.0171	29	29	30	44	46	31	middle
460	PC-5p-41017_125		TTTCACATGTGCCAATATTGAGTC	down	-inf	-inf	0.237511	31.4476	0	0	65.2374	29.1053	0	0	0	0	69.5	25.5	0	0	0	middle
461	mtr-miR399r_1ss20CA		TGCCAAAGAAGATTTGCCCAG	up	6.88896	2.78429	0.238798	0.488649	3.36628	1.46595	0	0	1.5254	6.87894	1.69451	1.25	0	0	1.5	6.75	1.75	low
462	mtr-miR399a_1ss9GA		TGCCAAAGAAGATTTGCCCAG	up	6.88896	2.78429	0.238798	0.488649	3.36628	1.46595	0	0	1.5254	6.87894	1.69451	1.25	0	0	1.5	6.75	1.75	low
463	PC-5p-69530_73		TGAACACTGGCTTGTTGTACA	down	-inf	-inf	0.239108	19.979	0	41.6329	18.304	0	0	0	0	35.5	19.5	0	0	0	0	middle
464	PC-5p-132338_33		TTGGGACAACTTGTGGGACAACC	up	2.63896	1.39997	0.239248	1.14138	3.01207	0	0	3.42415	4.06772	2.54776	2.42073	0	0	3	4	2.5	2.5	low
465	gma-miR1514b-5p_R+1_2ss8TC17AG		TTCATTTCTAAAATAGGCATTT	up	inf	inf	0.239387	0	3.17635	0	0	0	0	6.62416	2.90488	0	0	0	0	6.5	3	low
466	gma-miR9749_2ss5CT21CT		TTAGTTTCTTTCACCTTTCCT	down	-inf	-inf	0.240887	5.04011	0	10.5548	0	4.56554	0	0	0	9	0	4	0	0	0	middle
467	mtr-miR398a-3p_L-1		GTGTTCTCAGGTCACCCCTT	up	6.82175	2.77014	0.240982	2.73643	18.6673	8.2093	0	0	22.8809	33.1208	0	7	0	0	22.5	32.5	0	middle
468	mtr-miR5559-5p		TACTTGGTGAATTGTTGGATC	up	4.25249	2.08831	0.241808	1768.39	7520.07	4771.95	284.416	248.822	7979.86	13416.5	1163.89	4069	303	218	7847	13165	1202	high
469	PC-5p-49610_104		TTGGATAACGAGTGTCAATCA	up	1.42492	0.510884	0.241873	19.6479	27.9968	23.4551	20.6507	14.838	18.3048	35.6686	30.0171	20	22	13	18	35	31	middle
470	PC-5p-79008_64		CTCCAAAATTTTTCATCCATG	down	0.359564	-1.47568	0.242011	9.44756	3.39701	9.38205	4.69334	14.2673	0	10.191	0	8	5	12.5	0	10	0	middle
471	mtr-MIR2670d-p5_1ss19AG		ATAGTGAGTAGCCGACTTGGGG	up	1.43031	0.516325	0.243756	77.8308	111.322	59.2242	101.22	73.0486	129.828	70.9974	133.14	50.5	107.833	64	127.667	69.6667	137.5	middle
472	mtr-MIR2670c-p5_1ss16TC		ATAGTGAGTAGCCGACTTGGGG	up	1.43031	0.516325	0.243756	77.8308	111.322	59.2242	101.22	73.0486	129.828	70.9974	133.14	50.5	107.833	64	127.667	69.6667	137.5	middle
473	PC-5p-19074_258		ACGACCTGGAGACAGAGATGC	up	1.96506	0.974576	0.244123	9.10729	17.8964	12.9003	9.85601	4.56554	21.864	7.13371	24.6915	11	10.5	4	21.5	7	25.5	middle
474	PC-3p-371911_6		TTGTCCAAACTATAGTCTTAAT	up	inf	inf	0.245239	0	2.88565	0	0	0	2.54233	6.11461	0	0	0	0	2.5	6	0	low
475	PC-3p-66572_77		CGAATGTTTGAGTCCTGTTGCT	up	inf	inf	0.245239	0	11.5426	0	0	0	10.1693	24.4585	0	0	0	0	10	24	0	middle
476	mtr-miR395a_L-1R+1		TGAAGTGTTTGGGGGAACTCT	down	0.48198	-1.05295	0.245671	94.4633	45.5294	34.0099	122.496	126.884	37.6264	52.4838	46.478	29	130.5	111.167	37	51.5	48	middle
477	PC-5p-8486_537		TGTGCTGTATGTAACTTCGTCTA	up	1.85321	0.890023	0.245849	47.7598	88.5087	35.1827	96.6827	11.4138	79.3206	83.5664	102.639	30	103	10	78	82	106	middle
478	PC-3p-284092_10		CGAATGACAAGAACAACAAAGCAC	down	-inf	-inf	0.246463	5.36906	0	0	4.69334	11.4138	0	0	0	0	5	10	0	0	0	middle
479	ptc-miR6478_1ss21GA		CCGACCTTAGCTCAGTTGGTA	down	0.524376	-0.931326	0.247372	38.459	20.167	25.2143	29.0987	61.0641	17.2878	21.9107	21.3024	21.5	31	53.5	17	21.5	22	middle
480	PC-3p-78065_64		GAACCTAAAAAGTGAATTGTCTCC	up	2.57004	1.36179	0.2476	3.14138	8.07347	0	6.57067	2.85346	5.08465	5.09551	14.0402	0	7	2.5	5	5	14.5	middle
481	mtr-miR159a		TTTGGATTGAAGGGAGCTCTA	down	0.839032	-0.253202	0.247897	149078	125081	176239	124190	146804	121425	136235	117585	150278	132305	128620	119403	133681	121435	high
482	PC-3p-38429_133		ACTTGTCGCGTTCTGCCATTACCG	up	19.9167	4.31591	0.248102	1.09511	21.811	0	3.28534	0	0	20.8916	44.5415	0	3.5	0	0	20.5	46	middle
483	mtr-MIR171g-p5		CGTGATATTGATCCGGCTCATC	up	1.85914	0.894633	0.250561	79.7495	148.265	65.6744	36.608	136.966	199.318	68.2798	177.198	56	39	120	196	67	183	middle
484	stu-miR482a-3p_R+2_1ss9TA		TTTCCAATACCACCCATTCCTATT	down	0.598774	-0.739916	0.250679	8.36485	5.00866	8.79567	11.7333	4.56554	3.05079	7.13371	4.84146	7.5	12.5	4	3	7	5	middle
485	mtr-miR2199_L+2R-2		TTTGATACACTAGCACGGATC	down	0.782946	-0.353015	0.250749	204.15	159.839	259.179	184.917	168.354	164.234	167.133	148.149	221	197	147.5	161.5	164	153	middle
486	PC-5p-144420_29		TAGGAGTTTCTTGTTAGCCAGT	down	-inf	-inf	0.251046	4.1452	0	3.51827	8.91734	0	0	0	0	3	9.5	0	0	0	0	low
487	mtr-MIR2652h-p3_1ss7TC		AAGGATCCCTTATGCACCATAACC	up	1.87823	0.909376	0.2518	2.2365	4.20066	0	3.28534	3.42415	4.57619	5.60506	2.42073	0	3.5	3	4.5	5.5	2.5	low
488	mtr-miR2199		TGATACACTAGCACGGATCAC	up	1.12753	0.173169	0.252994	2247.33	2533.93	2612.31	2063.19	2066.48	2437.07	2492.72	2672	2227.5	2198	1810.5	2396.5	2446	2759.5	high
489	PC-5p-152500_27		TCATTGAGTAACTGACGTATC	down	-inf	-inf	0.253999	6.76382	0	14.6595	5.632	0	0	0	0	12.5	6	0	0	0	0	middle
490	stu-miR482c_R-1_2ss12AT21AC		TTTCCTATTCCTCCCATGCCC	up	inf	inf	0.254964	0	3.51062	0	0	0	7.62698	0	2.90488	0	0	0	7.5	0	3	low
491	mtr-MIR2111i-p3		AGCCTTGGAGTGCAGATTATC	up	8.62857	3.10912	0.255072	8.18062	70.587	4.69103	16.4267	3.42415	29.9995	149.808	31.9537	4	17.5	3	29.5	147	33	middle
492	mtr-MIR2111f-p3		AGCCTTGGAGTGCAGATTATC	up	8.62857	3.10912	0.255072	8.18062	70.587	4.69103	16.4267	3.42415	29.9995	149.808	31.9537	4	17.5	3	29.5	147	33	middle
493	PC-3p-185010_20		CAAGTGTGATCTTTAGTATTCTTC	down	0.533317	-0.906934	0.256269	9.26856	4.94308	5.86378	9.38667	12.5552	0	6.11461	8.71463	5	10	11	0	6	9	middle
494	PC-3p-130_17976		TCGGACCATGCTTCGTTCCCC	up	1.89167	0.919661	0.256362	675.549	1277.92	1161.62	3.28534	861.745	1571.16	1566.87	695.718	990.5	3.5	755	1545	1537.5	718.5	high
495	PC-3p-25946_193		TAACAGAATGACTGAGTTGCC	up	1.77878	0.830886	0.25665	7.52357	13.3828	11.7276	0	10.8431	14.7455	14.2674	11.1354	10	0	9.5	14.5	14	11.5	middle
496	PC-3p-274522_10		ATAGGATACTAAGTCAGCACGAGA	down	0.22019	-2.18318	0.256703	3.8569	0.849252	5.86378	0	5.70692	0	2.54776	0	5	0	5	0	2.5	0	low
497	PC-5p-13341_360		AAGTTTACTTGGTGGTTAAGTTAC	up	1.5311	0.614565	0.257009	20.2572	31.0157	15.8322	32.384	12.5552	25.4233	25.9871	41.6366	13.5	34.5	11	25	25.5	43	middle
498	PC-5p-29713_171		TTCTTGAAGTTTGAGCGGAGGC	up	16.4906	4.04357	0.257803	2.34551	38.679	7.03654	0	0	0	35.6686	80.3683	6	0	0	0	35	83	middle
499	mtr-MIR2671d-p3_1ss5GA		AAAAATAAGTTAAGGGACCAAAAC	down	0.736776	-0.440703	0.259407	83.4617	61.4925	81.1157	90.8943	78.375	89.6594	43.8214	50.9967	69.1667	96.8333	68.6667	88.1667	43	52.6667	middle
500	PC-3p-194056_18		CTCCTCGGTATGCTGATTACC	up	inf	inf	0.259556	0	3.01497	0	0	0	0	6.62416	2.42073	0	0	0	0	6.5	2.5	low
501	mtr-MIR2619a-p3_2ss5AG21TA		TAGGGGGCTGTTTTGTATTTA	down	0.147844	-2.75786	0.259795	6.87842	1.01693	0	7.50934	13.1259	3.05079	0	0	0	8	11.5	3	0	0	middle
502	PC-5p-57434_89		TGTTAGAGTAGGGTGTCGAAT	down	0.125303	-2.99651	0.262672	9.48862	1.18895	18.7641	0	9.70177	0	3.56686	0	16	0	8.5	0	3.5	0	middle
503	PC-5p-50447_102		CCGCAACCAGATACCGATTCGATC	up	1.61072	0.687705	0.264297	16.7603	26.9961	5.86378	21.5893	22.8277	16.2709	35.6686	29.0488	5	23	20	16	35	30	middle
504	PC-5p-111507_42		TGACCTAAATCCTGAACCTTG	down	0.481479	-1.05445	0.26506	27.3638	13.1751	34.0099	17.8347	30.2467	31.5249	5.09551	2.90488	29	19	26.5	31	5	3	middle
505	mtr-MIR5281f-p5		ATTTGGACTGAATTTTTAACTAGA	down	-inf	-inf	0.266725	2.55384	0	1.95459	0	5.70692	0	0	0	1.66667	0	5	0	0	0	low
506	PC-3p-8024_564		CCGTGCACTGAATCTCTTTTAC	up	74.9029	6.22695	0.267909	0.938667	70.3089	0	2.816	0	0	55.0315	155.895	0	3	0	0	54	161	middle
507	lja-miR167a_R+1		TGAAGCTGCCAGCATGATCTT	down	0.879042	-0.185996	0.267958	10353.2	9100.89	11191.8	10864.9	9002.86	9349.49	10162.1	7791.04	9543.17	11574.8	7887.67	9193.83	9971.67	8046.17	high
508	PC-5p-86375_57		TACATGTTCTTATTGGGTGCA	up	2.51015	1.32778	0.268722	1.52185	3.82007	0	0	4.56554	2.54233	4.07641	4.84146	0	0	4	2.5	4	5	low
509	gma-miR1509a_R-1_2ss9GT18GA		TTAATCAATGAAATCACAGTC	up	1.81309	0.858453	0.268857	376.047	681.808	508.976	2.816	616.347	491.686	953.88	599.857	434	3	540	483.5	936	619.5	high
510	mtr-MIR2620-p5_2ss6TC18GA_2		CAGTTCGAAAGTATTGTAGGGA	down	0.639641	-0.644666	0.269153	18.6521	11.9307	14.6595	20.1813	21.1156	3.05079	15.7961	16.9451	12.5	21.5	18.5	3	15.5	17.5	middle
511	mtr-MIR2620-p3_2ss6TC18GA		CAGTTCGAAAGTATTGTAGGGA	down	0.639641	-0.644666	0.269153	18.6521	11.9307	14.6595	20.1813	21.1156	3.05079	15.7961	16.9451	12.5	21.5	18.5	3	15.5	17.5	middle
512	gma-miR10420_R-1_1ss10TC		CCTGAACCACCATTTTTT	up	6.33252	2.66278	0.269412	2.28277	14.4557	0	0	6.84831	0	15.2865	28.0805	0	0	6	0	15	29	middle
513	mtr-MIR5759-p3_1ss18TC		TGAATCTTTTCTTCCCACTTCA	down	0.483644	-1.04798	0.269726	12.1876	5.89444	7.03654	11.264	18.2621	0	5.09551	12.5878	6	12	16	0	5	13	middle
514	mtr-MIR5275-p3_2ss2TA17AG		TAAAGGCTCAGGAAAAGGAAT	up	inf	inf	0.270023	0	4.08536	0	0	0	0	3.05731	9.19878	0	0	0	0	3	9.5	low
515	PC-3p-1288_2539		CGAGGCTTATGCGATCAAGGG	down	0.69912	-0.516387	0.270736	270.004	188.765	286.739	304.128	219.146	112.879	160.509	292.909	244.5	324	192	111	157.5	302.5	middle
516	PC-3p-26025_193		TGGTTTCCTATAGATAATGACAGA	down	0.400163	-1.32134	0.272285	27.1071	10.8473	26.9734	25.8133	28.5346	32.5418	0	0	23	27.5	25	32	0	0	middle
517	gra-miR167a_L-2R+2		AGATCATCTTGCAGCTTCAAT	down	0.84275	-0.246823	0.272938	377.214	317.897	431.574	391.894	308.174	265.927	364.839	322.926	368	417.5	270	261.5	358	333.5	middle
518	mtr-miR166c_L+2R-2		TCTCGGACCAGGCTTCATTCC	up	1.12167	0.165645	0.273593	2325.4	2608.32	2250.17	2153.11	2572.91	2525.09	2348.55	2951.32	1918.7	2293.8	2254.2	2483.05	2304.53	3047.97	high
519	mtr-miR166b_L+2R-2		TCTCGGACCAGGCTTCATTCC	up	1.12167	0.165645	0.273593	2325.4	2608.32	2250.17	2153.11	2572.91	2525.09	2348.55	2951.32	1918.7	2293.8	2254.2	2483.05	2304.53	3047.97	high
520	PC-3p-48554_106		TGTCGGAAAAAGTGACTTCGC	up	4.66114	2.22068	0.274287	2.19022	10.2089	0	6.57067	0	0	12.2292	18.3976	0	7	0	0	12	19	middle
521	mtr-miR482-3p_L-1R+2		TTACCTACACCTCCCATGCCTA	up	1.5664	0.647453	0.275379	4904.1	7681.78	4481.1	5861.98	4369.22	5944.98	5658.05	11442.3	3821	6245	3828	5846	5552	11817	high
522	gma-miR171m_R-1		TTGAGCCGCGTCAATATCTC	down	-inf	-inf	0.275414	3.25522	0	0	2.34667	7.419	0	0	0	0	2.5	6.5	0	0	0	low
523	PC-3p-46552_111		TGGATCATTGGACGTCTGTTG	up	1.65991	0.731107	0.275906	12.1506	20.1689	15.2458	7.50934	13.6966	15.254	14.2674	30.9854	13	8	12	15	14	32	middle
524	mtr-miR399d_1ss21AG		TGCCAAAGGAGAGCTGCCCTG	up	4.33416	2.11575	0.277114	8.09495	35.0847	6.45016	17.8347	0	0	62.1652	43.089	5.5	19	0	0	61	44.5	middle
525	mtr-miR399b		TGCCAAAGGAGAGCTGCCCTG	up	4.33416	2.11575	0.277114	8.09495	35.0847	6.45016	17.8347	0	0	62.1652	43.089	5.5	19	0	0	61	44.5	middle
526	mtr-miR5287b_L+1R-1_1ss17TC		TTGCTTATAATAGTGACCGGAGGG	up	1.54061	0.623503	0.277131	305.444	470.57	238.656	416.299	261.377	367.112	352.27	692.329	203.5	443.5	229	361	345.667	715	middle
527	PC-3p-2193_1650		CGGGGTCGGAGATTAGAGAAT	down	0.28929	-1.78941	0.277549	303.485	87.795	148.354	176	586.101	263.385	0	0	126.5	187.5	513.5	259	0	0	middle
528	mtr-MIR5269b-p3		ACATAAAGTGGTGGGACATACATT	down	0.754125	-0.407124	0.279182	103.959	78.3977	69.1926	118.272	124.411	84.4053	72.3562	78.4317	59	126	109	83	71	81	middle
529	mtr-miR5290_L+1R-2		CAATTTGGAGAGAGATAGACACA	down	0.844996	-0.242983	0.279249	118.14	99.8279	119.621	138.923	95.8763	92.5407	111.082	95.861	102	148	84	91	109	99	middle
530	mtr-MIR5214-p5		CCGTAGTCTAGCTCTATTAAC	down	0.780338	-0.35783	0.279623	1593.9	1243.78	1796.66	1806	1179.05	1433.87	868.275	1429.2	1532	1924	1033	1410	852	1476	high
531	PC-3p-92531_53		CAAAAAGGGCAATACTTAGGG	down	-inf	-inf	0.279687	8.16009	0	0	18.7733	5.70692	0	0	0	0	20	5	0	0	0	middle
532	PC-3p-3119_1224		TGGCTGGAAACAATACACACATGG	up	2.2481	1.16871	0.279838	141.02	317.026	163.013	185.856	74.19	80.3375	393.373	477.368	139	198	65	79	386	493	middle
533	mtr-miR5212-5p_1ss9GT		TGGATTTCTTATTTCTTTGGTA	down	0.606287	-0.721927	0.280487	33.6027	20.3729	50.4285	30.976	19.4035	14.237	27.5158	19.3659	43	33	17	14	27	20	middle
534	PC-3p-110126_43		CTCTAACAAATCTTTTACTCC	down	0.351365	-1.50896	0.280974	5.63211	1.97893	10.5548	2.34667	3.99484	0	2.54776	3.38902	9	2.5	3.5	0	2.5	3.5	middle
535	PC-3p-300436_8		ATTGCATTGTTATACCGCGAGAGA	up	inf	inf	0.283837	0	7.50826	0	0	0	0	5.09551	17.4293	0	0	0	0	5	18	middle
536	PC-3p-3928_1027		CTCAACGGTAATGAACAGTGAAAT	up	2.63737	1.3991	0.283956	98.46	259.675	58.0514	106.069	131.259	224.742	86.1141	468.169	49.5	113	115	221	84.5	483.5	middle
537	PC-3p-111366_42		ACTCGTTTGGTTCATGAACTGACT	down	0.258619	-1.9511	0.284429	6.24015	1.61382	0	8.448	10.2725	0	0	4.84146	0	9	9	0	0	5	middle
538	mtr-miR399q		TGCCAAAGGAGAGCTGCTCTT	up	4.11842	2.04209	0.284654	12.5278	51.5946	12.9003	17.8347	6.84831	11.1862	102.929	40.6683	11	19	6	11	101	42	middle
539	PC-3p-83498_60		TATGAGAAAAACACTGAAGTC	up	2.63639	1.39856	0.287145	3.75467	9.89876	0	11.264	0	6.10158	7.13371	16.461	0	12	0	6	7	17	middle
540	mtr-miR5205a_R+1		CATACAATTTGGGACGGAGGGAGT	down	0.207913	-2.26595	0.287172	7.762	1.61382	0	8.448	14.838	0	0	4.84146	0	9	13	0	0	5	middle
541	mtr-MIR5294a-p5_1ss4CT		GTTTAGCTATTTAAACGTCATCCC	up	3.76126	1.91122	0.287317	0.781838	2.9407	2.34551	0	0	4.74568	4.07641	0	2	0	0	4.66667	4	0	low
542	PC-3p-15549_312		TGGGATTGAAAGTAAGATAAT	up	3.49629	1.80582	0.287336	17.7914	62.204	25.2143	28.16	0	0	91.7192	94.8927	21.5	30	0	0	90	98	middle
543	gma-MIR1509b-p5_2ss9AT19GA		TTTAATCATGGAAATCACAGT	up	inf	inf	0.289491	0	7.83102	0	0	0	0	5.09551	18.3976	0	0	0	0	5	19	middle
544	PC-3p-125240_36		TATTGGAGGCTCATTACTTC	up	inf	inf	0.289491	0	3.91551	0	0	0	0	2.54776	9.19878	0	0	0	0	2.5	9.5	low
545	PC-5p-74029_68		TTGTTGGGTTGTAGGTGTAGT	up	1.78084	0.832554	0.290594	4.0419	7.19797	5.2774	0	6.84831	5.59312	10.191	5.80976	4.5	0	6	5.5	10	6	middle
546	PC-3p-94810_51		AAACCCGTAAGCAATTTTCAGCAT	down	0.200018	-2.3218	0.290729	11.6768	2.33556	0	12.2027	22.8277	0	4.58596	2.42073	0	13	20	0	4.5	2.5	middle
547	mtr-miR162		TCGATAAACCTCTGCATCCAG	down	0.89456	-0.16075	0.291165	5226.93	4675.8	5965.81	4827.57	4887.41	5137.53	4582.9	4306.97	5087	5143	4282	5052	4497	4448	high
548	PC-5p-134169_33		TTCACTGTTCATGACCGTTGAGA	up	inf	inf	0.292383	0	7.98879	0	0	0	5.08465	0	18.8817	0	0	0	5	0	19.5	middle
549	PC-3p-116774_39		CGGACGTTGGAGTCCTGCTGCT	down	0.245946	-2.02359	0.29288	11.0261	2.71182	19.9369	13.1413	0	8.13545	0	0	17	14	0	8	0	0	middle
550	gma-miR396a-5p_R+1		TTCCACAGCTTTCTTGAACTGT	down	0.695989	-0.522864	0.293067	61.1651	42.5702	76.8155	53.0347	53.6451	41.1857	65.2225	21.3024	65.5	56.5	47	40.5	64	22	middle
551	PC-5p-259843_11		TGTGGGACACTAGTTAAGGAAACC	up	inf	inf	0.294431	0	3.86422	0	0	0	0	9.17192	2.42073	0	0	0	0	9	2.5	low
552	gma-miR9749_L+1_1ss22CT		TTTAGCTTCTTTCACCTTTCCT	up	1.88137	0.911784	0.294564	9.03652	17.001	11.1412	7.97867	7.98969	15.254	8.15282	27.5963	9.5	8.5	7	15	8	28.5	middle
553	mtr-miR159b_L-1_1ss7GC		TTGGACTGAAGGGAGCTCCA	up	2.13443	1.09385	0.294931	1.34207	2.86456	1.17276	0	2.85346	4.4067	3.05731	1.12967	1	0	2.5	4.33333	3	1.16667	low
554	PC-3p-101975_47		CAATCCCGCAATCTTTGAAGCCCC	down	0.652807	-0.615271	0.295139	5.38272	3.51388	2.93189	7.50934	5.70692	3.05079	4.58596	2.90488	2.5	8	5	3	4.5	3	low
555	mtr-miR167a		TGAAGCTGCCAGCATGATCTA	down	0.81664	-0.292229	0.298192	258.113	210.786	275.011	237.952	261.377	258.809	228.788	144.76	234.5	253.5	229	254.5	224.5	149.5	middle
556	PC-5p-33997_150		CAAATCAACGCTGACGTGGACGCC	up	1.56122	0.642676	0.298896	8.7244	13.6207	6.45016	11.7333	7.98969	14.237	19.3629	7.26219	5.5	12.5	7	14	19	7.5	middle
557	PC-5p-1126_2859		CTACTGAATGAGAACCGTCAT	down	0.630066	-0.666425	0.299729	532.773	335.682	356.518	430.848	810.953	465.246	233.884	307.917	304	459	710.5	457.5	229.5	318	middle
558	mtr-miR5272f		GAATTGATTATGTTTGGATACACT	up	1.38188	0.466636	0.300324	67.4223	93.1698	38.701	88.2347	75.3314	68.1344	122.292	89.0829	33	94	66	67	120	92	middle
559	PC-5p-151303_27		TGTTGTATCCACATCTCTCTC	down	0.268015	-1.89961	0.300343	6.02138	1.61382	10.5548	7.50934	0	0	0	4.84146	9	8	0	0	0	5	middle
560	mtr-miR5286a_L-1R+1		AGGACAAACTGGAGGCAAGGGACA	up	1.25129	0.323415	0.301715	44.0511	55.1207	28.7325	54.912	48.5088	57.9651	46.8787	60.5183	24.5	58.5	42.5	57	46	62.5	middle
561	mtr-MIR5286b-p3		AGGACAAACTGGAGGCAAGGGACA	up	1.25129	0.323415	0.301715	44.0511	55.1207	28.7325	54.912	48.5088	57.9651	46.8787	60.5183	24.5	58.5	42.5	57	46	62.5	middle
562	mtr-miR1510a-5p		TTGTCTTACCCATTCCTCCCA	up	1.27632	0.351992	0.303232	5585.11	7128.39	4866.94	6499.33	5389.05	6663.44	5463.41	9258.33	4150	6924	4721.5	6552.5	5361	9561.5	high
563	mtr-miR2670a_L+2R-1		TCCAAGAAGGTTGCTCACTATT	down	0.252656	-1.98475	0.30528	8.04992	2.03386	0	15.0187	9.13107	6.10158	0	0	0	16	8	6	0	0	middle
564	PC-5p-114089_41		ATACCTGCCACTCTTGATTGTGAG	down	-inf	-inf	0.30574	5.99116	0	0	14.5493	3.42415	0	0	0	0	15.5	3	0	0	0	middle
565	ptc-MIR171g-p3		TTGAGCCGTGCCAATATCACAC	down	0.534427	-0.903936	0.306167	6.43243	3.43766	8.79567	4.224	6.27761	3.05079	0	7.26219	7.5	4.5	5.5	3	0	7.5	low
566	PC-3p-510_5431		TTGCAGGTCGAGAATAAAATG	up	1.18158	0.240721	0.30637	316.599	374.088	333.649	315.392	300.755	376.264	299.616	446.383	284.5	336	263.5	370	294	461	middle
567	gma-miR319d		TGGACTGAAGGGGAGCTCCTTC	up	1.16076	0.215068	0.306454	287.837	334.109	316.058	274.091	273.362	397.62	281.782	322.926	269.5	292	239.5	391	276.5	333.5	middle
568	PC-3p-15_121903		CGGGATCGGAGATTAGAGAAT	down	0.675164	-0.566689	0.306549	10218.4	6899.1	13438	5623.55	11593.6	7908.16	8650.65	4138.48	11458.5	5991	10157.5	7776.5	8488.5	4274	high
569	PC-3p-68907_74		ATATGACGTGTTAGGTGAGAGACC	up	1.7099	0.773912	0.306952	3.71207	6.34727	0	6.57067	4.56554	7.62698	5.60506	5.80976	0	7	4	7.5	5.5	6	low
570	PC-5p-13463_357		AAATACACTAAAGTCACCGATGTC	down	0.68812	-0.539268	0.306992	29.2523	20.1291	30.4917	28.16	29.1053	11.6947	15.2865	33.4061	26	30	25.5	11.5	15	34.5	middle
571	PC-5p-46323_111		ATAGAGTTGGGTGACATTGGTGAC	up	1.17237	0.229434	0.307429	5.53878	6.49352	5.2774	5.632	5.70692	5.08465	7.13371	7.26219	4.5	6	5	5	7	7.5	low
572	lja-miR2111-3p_1ss2TA		GACCTTAGGATGCAGATTACC	up	inf	inf	0.308739	0	5.21455	0	0	0	0	12.7388	2.90488	0	0	0	0	12.5	3	middle
573	mtr-miR1510a-5p_L-1R+2_2		TGTCTTACCCATTCCTCCCATT	up	1.38397	0.468816	0.309201	1701.34	2354.61	1484.71	2011.09	1608.21	1932.68	1809.42	3321.73	1266	2142.5	1409	1900.5	1775.5	3430.5	high
574	mtr-miR1510a-5p_L-1R+2_1		TGTCTTACCCATTCCTCCCATA	up	1.38397	0.468816	0.309201	1701.34	2354.61	1484.71	2011.09	1608.21	1932.68	1809.42	3321.73	1266	2142.5	1409	1900.5	1775.5	3430.5	high
575	mtr-MIR5752a-p5		TGTGCTAAGACCAAATAATGTG	up	2.11082	1.0778	0.309359	11.2625	23.773	9.38205	24.4053	0	11.1862	21.4011	38.7317	8	26	0	11	21	40	middle
576	PC-3p-31_75457		CGGGATCAGAGATTAGAGAAT	up	1.42469	0.510646	0.315198	5556.89	7916.84	6273.07	4142.81	6254.79	11115.1	7636.64	4998.81	5349	4413.5	5480	10930	7493.5	5162.5	high
577	PC-3p-90792_54		TACAACAATCCAGTGTTCAAA	down	-inf	-inf	0.319119	13.8788	0	34.5963	7.04	0	0	0	0	29.5	7.5	0	0	0	0	middle
578	mtr-miR2592ap		AGGCTGGTTTAGATGAAGGTA	up	1.60975	0.686834	0.31924	52.4014	84.3529	59.3219	37.1034	60.7787	36.7507	117.112	99.1962	50.5833	39.5278	53.25	36.1389	114.917	102.444	middle
579	PC-3p-177356_21		ATAACCAGATGTCCATGAAATCGA	down	-inf	-inf	0.320041	6.80971	0	17.005	0	3.42415	0	0	0	14.5	0	3	0	0	0	middle
580	PC-3p-261_9378		TGCTGAGGTAGAAAGATGGTC	down	0.697156	-0.520446	0.32014	636.224	443.547	894.813	384.384	629.473	507.448	391.335	431.859	763	409.5	551.5	499	384	446	middle
581	mtr-MIR2111o-p3		GTCCTCGGGATGCTGATTACC	up	2.82752	1.49954	0.320142	12.7481	36.0456	12.9003	25.344	0	20.3386	71.3371	16.461	11	27	0	20	70	17	middle
582	PC-5p-15631_311		TCAAGTTCTTATAGTTCAAAA	up	1.8945	0.92182	0.320144	28.3099	53.6331	0	50.688	34.2415	34.5756	86.6237	39.7	0	54	30	34	85	41	middle
583	csi-miR171a_R+3		TTGAGCCGTGCCAATATCACATT	down	0.549326	-0.864265	0.320841	10.6284	5.83844	17.5913	5.16267	9.13107	6.61005	5.09551	5.80976	15	5.5	8	6.5	5	6	middle
584	mtr-MIR171c-p5		TATTGGCTTGGTTCACTCAGA	up	1.3756	0.460058	0.321033	32.2723	44.3937	34.0099	26.2827	36.5243	35.5926	34.6495	62.939	29	28	32	35	34	65	middle
585	PC-5p-13856_347		TATAATCACATTCATCGGCATC	up	1.84369	0.882599	0.321131	16.7571	30.895	24.0415	15.9573	10.2725	50.8465	13.7579	28.0805	20.5	17	9	50	13.5	29	middle
586	PC-3p-24334_206		CTCAACGGTAATGAACAGTGA	up	2.32688	1.2184	0.321359	20.8542	48.5251	19.9369	6.10134	36.5243	19.8301	36.1781	89.5671	17	6.5	32	19.5	35.5	92.5	middle
587	mtr-miR7701-5p_R+3_1ss15TC		ATTAAATGAATGAACCTAAAAAGT	down	0.736007	-0.442209	0.321567	243.579	179.276	159.495	330.411	240.832	179.997	195.158	162.673	136	352	211	177	191.5	168	middle
588	PC-3p-2584_1436		CTGGTTAATCACCTCCACACG	up	1.30162	0.380306	0.321999	72.002	93.7191	39.8737	80.256	95.8763	84.4053	100.891	95.861	34	85.5	84	83	99	99	middle
589	ptc-miR168a-5p_1ss21AC		TCGCTTGGTGCAGGTCGGGAC	down	0.572512	-0.804622	0.32431	26.0373	14.9067	14.6595	20.6507	42.8019	10.1693	13.2483	21.3024	12.5	22	37.5	10	13	22	middle
590	nta-miR168a		TCGCTTGGTGCAGGTCGGGAC	down	0.572512	-0.804622	0.32431	26.0373	14.9067	14.6595	20.6507	42.8019	10.1693	13.2483	21.3024	12.5	22	37.5	10	13	22	middle
591	PC-5p-84755_59		TTTTGACAACTGTTGTGACAACCC	up	1.69367	0.760153	0.324345	2.27028	3.84511	0	2.816	3.99484	3.05079	5.09551	3.38902	0	3	3.5	3	5	3.5	low
592	gma-miR172a_R+1_2ss9GT21TG		AGAATCTTTATGATGCTGCAGT	up	1.70125	0.766592	0.325498	26.1891	44.554	32.2508	7.50934	38.8071	70.6767	30.0635	32.9219	27.5	8	34	69.5	29.5	34	middle
593	gma-miR159d_1ss21CT		AGCTGCTTAGCTATGGATCCT	down	0.208084	-2.26476	0.326149	3.87782	0.806911	8.2093	0	3.42415	0	0	2.42073	7	0	3	0	0	2.5	low
594	PC-3p-146817_29		GTAAGTTGGAGCAATGTATTTGGT	up	3.16377	1.66165	0.32654	1.87733	5.93946	0	5.632	0	8.13545	0	9.68293	0	6	0	8	0	10	low
595	PC-5p-26962_187		AGAGCTAGAGGCCATCTTGGA	up	1.17	0.226514	0.326676	29.0862	34.031	34.5963	30.976	21.6863	36.101	32.1017	33.8902	29.5	33	19	35.5	31.5	35	middle
596	mtr-miR2111a-5p_L-2R+2		ATCTGCATCCTGAGGTTTAGA	up	2.33493	1.22338	0.32691	0.730074	1.70468	0	2.19022	0	1.35591	2.54776	1.21037	0	2.33333	0	1.33333	2.5	1.25	low
597	PC-3p-150316_28		CAGATCATGGTGGCAGTTTCA	up	3.25487	1.7026	0.327248	1.17276	3.81717	3.51827	0	0	6.61005	0	4.84146	3	0	0	6.5	0	5	low
598	mtr-MIR169k-p3		AGCGGGCCATCTTGTCTCACA	down	0.311303	-1.68361	0.327442	12.7682	3.97479	0	23.4667	14.838	0	6.11461	5.80976	0	25	13	0	6	6	middle
599	mtr-miR5263_L+2R+1_2ss3TG22GA		AAGGACTAAAACTAGTAACGGAGC	down	0.714653	-0.484685	0.329657	86.3794	61.7313	49.2558	95.744	114.138	65.0836	59.1079	61.0024	42	102	100	64	58	63	middle
600	mtr-miR395a		ATGAAGTGTTTGGGGGAACTC	down	0.322506	-1.6326	0.330485	3.68661	1.18895	0	5.16267	5.89715	0	3.56686	0	0	5.5	5.16667	0	3.5	0	middle
601	PC-3p-134373_32		AAAGACACCAATGACATCAAAGCT	down	0.283667	-1.81773	0.331646	11.6768	3.31232	0	12.2027	22.8277	0	5.09551	4.84146	0	13	20	0	5	5	middle
602	mtr-MIR5283-p5_1ss9TC		TATCGGGACGTATCGGAAAGTATC	down	0.595096	-0.748806	0.332244	8.84144	5.2615	8.2093	10.3253	7.98969	6.10158	0	9.68293	7	11	7	6	0	10	middle
603	PC-3p-80838_62		AATGTCACCCAACTCTATGTCACA	down	0.460124	-1.1199	0.332343	5.38436	2.47748	4.10465	2.34667	9.70177	3.55926	0	3.87317	3.5	2.5	8.5	3.5	0	4	low
604	mtr-MIR399q-p5		GGGCATATCTCCTTTGGCAGG	up	inf	inf	0.332793	0	13.1467	0	0	0	0	33.6304	5.80976	0	0	0	0	33	6	middle
605	mtr-MIR171h-p5		GTGGTGTTGTTTCTGCTCATC	down	0.265136	-1.9152	0.33372	24.3052	6.44418	8.2093	12.2027	52.5037	14.237	5.09551	0	7	13	46	14	5	0	middle
606	PC-5p-44928_114		TGAAAAAGGAATACTGCAAATC	down	0.653642	-0.613427	0.336363	8.50038	5.55621	6.45016	12.2027	6.84831	9.15238	5.09551	2.42073	5.5	13	6	9	5	2.5	middle
607	mtr-MIR171d-p5		TATTGGCCTGGTTCACTCAGA	up	1.38776	0.472756	0.336705	19.981	27.7288	30.4917	16.896	12.5552	36.6095	21.4011	25.1756	26	18	11	36	21	26	middle
608	PC-5p-25551_196		CAGGGATCAAGCTTTTTAGAGAGA	up	1.66638	0.736714	0.338011	10.9295	18.2127	12.9003	13.6107	6.27761	7.11852	20.8916	26.628	11	14.5	5.5	7	20.5	27.5	middle
609	PC-3p-104472_46		GGTCCGGGTAGCAGAATAATCATC	down	0.151509	-2.72252	0.338748	13.4527	2.0382	9.38205	30.976	0	0	6.11461	0	8	33	0	0	6	0	middle
610	PC-5p-50129_103		GTGAAGTTTGTTGGGTGGTAGGC	up	1.8409	0.880413	0.338992	11.964	22.0245	24.6279	11.264	0	32.5418	12.2292	21.3024	21	12	0	32	12	22	middle
611	ptc-miR396e-3p_L+1R+2		GCTCAAGAAAGCTGTGGGAGATC	up	3.83798	1.94035	0.339483	1.56445	6.00431	0	4.69334	0	12.2032	0	5.80976	0	5	0	12	0	6	middle
612	PC-3p-3857_1045		ACCGACACTTCACATTGAACC	up	1.31171	0.391451	0.343282	110.271	144.644	103.203	92.928	134.683	199.318	122.292	112.322	88	99	118	196	120	116	middle
613	PC-5p-240634_12		AAAGTTGAGTCAATAAAAGTT	down	0.205193	-2.28495	0.343662	4.1388	0.849252	0	3.28534	9.13107	0	2.54776	0	0	3.5	8	0	2.5	0	low
614	PC-3p-131169_34		ATGAACCTAAAAATGAATTTTGCT	down	0.372072	-1.42635	0.3441	6.84262	2.54595	11.1412	9.38667	0	2.54233	5.09551	0	9.5	10	0	2.5	5	0	middle
615	PC-3p-51355_100		TGATTCGGATAATTTGGAACA	up	2.48236	1.31171	0.344621	3.8448	9.54417	3.51827	5.16267	2.85346	2.54233	18.3438	7.74634	3	5.5	2.5	2.5	18	8	middle
616	mtr-miR5228_L-1R+1		CTGGTGTACAACTTGATGGAG	up	2.94357	1.55757	0.345013	2.19022	6.44708	0	6.57067	0	10.1693	9.17192	0	0	7	0	10	9	0	middle
617	mtr-MIR5295a-p3		AGGCTCGGCTCTGGGAATGAAAAG	up	1.31967	0.400174	0.3458	177.783	234.614	118.448	214.016	200.884	236.945	158.98	307.917	101	228	176	233	156	318	middle
618	mtr-miR2600e_1ss11GA		AAGCATTGTGACATTGTGATTGGC	up	2.23125	1.15785	0.346246	1.71208	3.82007	0	0	5.13623	2.54233	4.07641	4.84146	0	0	4.5	2.5	4	5	low
619	mtr-miR5225a_L-1R+1		CAGTCGCAGGAGAGATGACACC	up	4.33611	2.1164	0.346492	1.25156	5.42689	0	3.75467	0	11.6947	4.58596	0	0	4	0	11.5	4.5	0	middle
620	PC-3p-60941_84		TAACATGACTGACAAAGATAA	down	0.534378	-0.904067	0.347907	8.36001	4.4674	5.86378	14.08	5.13623	0	6.62416	6.77805	5	15	4.5	0	6.5	7	middle
621	PC-3p-171080_22		GAGAGATATGCAGTGTAGAAG	down	0.192229	-2.3791	0.347994	8.83584	1.6985	19.9369	6.57067	0	0	5.09551	0	17	7	0	0	5	0	middle
622	mtr-miR393a_R+1		TCCAAAGGGATCGCATTGATCC	up	1.14599	0.196598	0.350305	54.1889	62.1001	56.2923	54.912	51.3623	71.1852	65.7321	49.3829	48	58.5	45	70	64.5	51	middle
623	mtr-miR5225b_1ss9GT		TCGCAGGATAGATGACACCTTC	up	3.2369	1.69461	0.350366	5.23993	16.9612	5.86378	9.85601	0	33.5587	17.3247	0	5	10.5	0	33	17	0	middle
624	mtr-MIR2592ac-p3_1ss17TC		AGGAAAAACATGAATGCCGGG	up	4.70292	2.23356	0.350808	1.25156	5.88597	0	3.75467	0	0	4.58596	13.072	0	4	0	0	4.5	13.5	middle
625	mtr-MIR2592s-p3_1ss20AG		AGGAAAAACATGAATGCCGGG	up	4.70292	2.23356	0.350808	1.25156	5.88597	0	3.75467	0	0	4.58596	13.072	0	4	0	0	4.5	13.5	middle
626	mtr-MIR5281c-p3_1ss2AT		ATTTCTCTTATAAATAGGACCGGA	up	1.10862	0.148766	0.350918	88.1357	97.709	81.4088	103.957	79.0409	98.4728	99.2775	95.3768	69.4167	110.75	69.25	96.8333	97.4167	98.5	middle
627	mtr-MIR5281f-p3_1ss2AT		ATTTCTCTTATAAATAGGACCGGA	up	1.10862	0.148766	0.350918	88.1357	97.709	81.4088	103.957	79.0409	98.4728	99.2775	95.3768	69.4167	110.75	69.25	96.8333	97.4167	98.5	middle
628	mtr-MIR5281b-p3_1ss2AT		ATTTCTCTTATAAATAGGACCGGA	up	1.10862	0.148766	0.350918	88.1357	97.709	81.4088	103.957	79.0409	98.4728	99.2775	95.3768	69.4167	110.75	69.25	96.8333	97.4167	98.5	middle
629	mtr-miR1510a-5p_L-1R+1		TGTCTTACCCATTCCTCCCAT	up	1.28353	0.360113	0.351654	1836.65	2357.38	1780.83	2136.88	1592.23	2150.3	1738.59	3183.26	1518.5	2276.5	1395	2114.5	1706	3287.5	high
630	PC-3p-15659_310		TCTTCGACGCTACACTCAATT	down	0.369153	-1.43771	0.35224	39.3081	14.5107	79.7474	18.7733	19.4035	4.57619	33.6304	5.32561	68	20	17	4.5	33	5.5	middle
631	mtr-MIR5230-p3_2ss9TC17TA		TGAATGGTCTAAGATAATGGA	down	0.596483	-0.745446	0.352617	5.40363	3.22318	5.2774	7.50934	3.42415	5.59312	4.07641	0	4.5	8	3	5.5	4	0	low
632	gma-MIR395i-p5		AGTTCCTCTGAACGCTTCATG	down	0.384254	-1.37987	0.354058	9.50419	3.65203	0	15.9573	12.5552	0	6.11461	4.84146	0	17	11	0	6	5	middle
633	gma-MIR395h-p5		AGTTCCTCTGAACGCTTCATG	down	0.384254	-1.37987	0.354058	9.50419	3.65203	0	15.9573	12.5552	0	6.11461	4.84146	0	17	11	0	6	5	middle
634	mtr-miR2670a_L+1_1ss10TC		CCAAGAAGGCTGCTCACTATTT	down	0.607247	-0.719645	0.354678	216.49	131.463	121.967	353.252	174.251	156.946	68.9592	168.483	104	376.333	152.667	154.333	67.6667	174	middle
635	PC-3p-52525_98		TTTGGAGAAAAGTAATGCTGAT	up	3.83221	1.93818	0.355162	3.37547	12.9355	3.51827	3.75467	2.85346	0	11.2101	27.5963	3	4	2.5	0	11	28.5	middle
636	mtr-MIR2620-p3_1ss2GA		AATTTGAAAGTATTGTGGGGA	down	0.352623	-1.5038	0.357198	2.89006	1.0191	4.10465	0	4.56554	0	3.05731	0	3.5	0	4	0	3	0	low
637	mtr-MIR5244-p5_2ss15TA18AT		CGCCAACAAAAAGTAGCTGAG	down	0.219562	-2.1873	0.357403	7.3502	1.61382	16.4186	5.632	0	0	0	4.84146	14	6	0	0	0	5	middle
638	mtr-MIR2670a-p3_1ss7TC		AGAAGGCTGCTCACTATTTTACCC	up	1.52951	0.613071	0.357586	10.4614	16.0008	9.38205	14.3929	7.60923	23.7284	7.81312	16.461	8	15.3333	6.66667	23.3333	7.66667	17	middle
639	mtr-MIR2670c-p3_1ss7TC		AGAAGGCTGCTCACTATTTTACCC	up	1.52951	0.613071	0.357586	10.4614	16.0008	9.38205	14.3929	7.60923	23.7284	7.81312	16.461	8	15.3333	6.66667	23.3333	7.66667	17	middle
640	PC-5p-223352_14		AAGGAAAAATGAGTCAACATAAGT	up	2.823	1.49723	0.357722	1.87733	5.29972	0	5.632	0	0	8.15282	7.74634	0	6	0	0	8	8	low
641	PC-3p-12237_388		CATTTTCAGCACCAACCTGTCT	down	0.672871	-0.571598	0.359993	43.4514	29.2372	41.0465	64.768	24.5398	41.1857	20.382	26.1439	35	69	21.5	40.5	20	27	middle
642	mtr-MIR2592ay-p3		TTGGCAAGTTTGAATTTACCCC	up	1.54505	0.627652	0.360552	151.737	234.442	173.568	168.647	112.997	132.201	368.956	202.168	148	179.667	99	130	362.04	208.788	middle
643	mtr-MIR2118-p5		GGATATGGGAGGATCGGTAAAA	up	1.18502	0.244913	0.361072	967.948	1147.04	973.388	701.184	1229.27	1098.29	1214.77	1128.06	830	747	1077	1080	1192	1165	high
644	mtr-MIR5230-p3_1ss19AG		ATGGTTTAAGATATTGGAGAC	up	4.80563	2.26473	0.361086	0.977297	4.69653	2.93189	0	0	0	10.7006	3.38902	2.5	0	0	0	10.5	3.5	middle
645	ptc-miR172b-5p_R+1		GGAGCATCATCAAGATTCACAT	up	2.7829	1.47659	0.36265	0.951153	2.64696	0	0	2.85346	4.06772	0	3.87317	0	0	2.5	4	0	4	low
646	ptc-miR6478_R+2_1ss21GA		CCGACCTTAGCTCAGTTGGTAGA	down	0.815799	-0.293714	0.363762	61.1691	49.9017	54.5332	50.2187	78.7555	39.6603	61.1461	48.8988	46.5	53.5	69	39	60	50.5	middle
647	mtr-miR160a		TGCCTGGCTCCCTGTATGCCA	up	1.12843	0.17432	0.363858	342.371	386.342	404.21	293.803	329.099	414.06	330.699	414.268	344.667	313	288.333	407.167	324.5	427.833	middle
648	mtr-miR2635_L+3R+1_1ss11TC		AATATTATTGCCAACGTGACTAGA	down	0.344573	-1.53712	0.36457	8.43038	2.90488	0	15.0187	10.2725	0	0	8.71463	0	16	9	0	0	9	middle
649	PC-3p-4258_958		TTAGCCCATTGAGAGGTCCCTGCC	down	0.829126	-0.270336	0.365199	134.496	111.514	141.317	154.88	107.29	95.5915	92.7383	146.212	120.5	165	94	94	91	151	middle
650	PC-5p-42103_122		TTTTGGTTTTGGTCGAGGATC	up	2.18055	1.12469	0.366567	8.08613	17.6322	6.45016	12.672	5.13623	34.0672	8.66237	10.1671	5.5	13.5	4.5	33.5	8.5	10.5	middle
651	mtr-MIR2655d-p5		ACTAATTAAATAAGTTAAGGGACC	up	1.69928	0.764924	0.367449	3.14138	5.33808	0	6.57067	2.85346	5.59312	5.09551	5.32561	0	7	2.5	5.5	5	5.5	low
652	mtr-MIR2655k-p5		ACTAATTAAATAAGTTAAGGGACC	up	1.69928	0.764924	0.367449	3.14138	5.33808	0	6.57067	2.85346	5.59312	5.09551	5.32561	0	7	2.5	5.5	5	5.5	low
653	mtr-MIR2634-p5		TCAACAAACTCAGAATTGAAG	down	0.570543	-0.809591	0.367596	8.14732	4.6484	12.9003	4.69334	6.84831	8.13545	0	5.80976	11	5	6	8	0	6	middle
654	gma-miR391-5p_R-1_2ss17CT20TC		TACGCAGGAGAGATGATGCCG	up	1.36886	0.45297	0.3676	74.9033	102.532	70.3654	80.7254	73.6193	147.455	65.7321	94.4085	60	86	64.5	145	64.5	97.5	middle
655	PC-5p-170554_23		TGGGTTGAAACAATTGCGGATC	down	0.337698	-1.5662	0.369089	2.51483	0.849252	4.69103	0	2.85346	0	2.54776	0	4	0	2.5	0	2.5	0	low
656	mtr-miR156d-3p_L-1		GCTCACTCATCTTTCTGTCAAA	down	0.616339	-0.698205	0.369435	23.1759	14.2842	19.9369	18.7733	30.8174	25.4233	0	17.4293	17	20	27	25	0	18	middle
657	PC-5p-120346_38		ATGTTAGTTTGAGCAATCGAAATG	down	0.632019	-0.66196	0.370056	6.8185	4.30942	7.03654	6.57067	6.84831	7.11852	0	5.80976	6	7	6	7	0	6	low
658	mtr-miR5273_L-1R+1_1ss16GA		AGGGGCTGTAGTTTAAGAAGAGGG	up	3.87675	1.95485	0.371528	4.38045	16.9819	0	13.1413	0	7.11852	5.09551	38.7317	0	14	0	7	5	40	middle
659	cas-miR156k-3p_R+1		TGCTTACTCTCTATCTGTCACCT	up	4.64062	2.21432	0.371843	0.951153	4.41394	0	0	2.85346	3.05079	10.191	0	0	0	2.5	3	10	0	middle
660	mtr-miR398a-5p_L-1R+1		GAGTGACACTGAGAACACAAGA	up	3.93553	1.97656	0.372739	571.111	2247.63	1633.06	22.0587	58.2106	1305.74	5111.31	325.83	1392.5	23.5	51	1284	5015.5	336.5	high
661	mtr-MIR2651-p5		ATTTAATGCAGGCATACTAGT	up	3.84834	1.94424	0.372777	1.56445	6.02052	0	4.69334	0	13.2201	0	4.84146	0	5	0	13	0	5	middle
662	PC-3p-92556_53		GTGTCGTTTAGGATTGGAAGGTCC	down	0.400133	-1.32145	0.373139	6.26145	2.50541	0	10.7947	7.98969	0	5.09551	2.42073	0	11.5	7	0	5	2.5	middle
663	mtr-miR7696a-5p		TCAAGTTCTCATAATTCAAAA	down	0.741331	-0.43181	0.373286	25.9605	19.2453	29.7098	25.344	22.8277	30.8469	14.9468	11.9423	25.3333	27	20	30.3333	14.6667	12.3333	middle
664	mtr-miR168b		TCGCTTGGTGCAGGTCGGGAA	down	0.853441	-0.228636	0.37497	5528.51	4718.26	5837.98	4562.39	6185.16	5928.71	3766.6	4459.47	4978	4860.5	5419	5830	3696	4605.5	high
665	PC-5p-1269_2569		TCTTATTTTCGACATTGCAAAG	up	1.20665	0.271003	0.375155	159.657	192.65	141.904	201.813	135.254	199.827	145.732	232.39	121	215	118.5	196.5	143	240	middle
666	PC-3p-16566_294		TCATGGATGAAAATTTTTGGAAGG	down	0.747407	-0.420035	0.375702	29.786	22.2623	28.7325	25.8133	34.8122	9.15238	29.554	28.0805	24.5	27.5	30.5	9	29	29	middle
667	mtr-miR2661		TAGGTTTGAGAAAATGGGCAG	up	1.15228	0.204488	0.376236	487.277	561.479	357.691	568.832	535.309	579.651	581.907	522.878	305	606	469	570	571	540	high
668	mtr-miR530_1ss21CT		TGCATTTGCACCTGCACTTTT	up	1.53144	0.614891	0.376474	4.50959	6.90618	4.10465	6.57067	2.85346	9.66084	8.15282	2.90488	3.5	7	2.5	9.5	8	3	middle
669	ptc-miR168a-5p_R+2		TCGCTTGGTGCAGGTCGGGAACT	up	1.65883	0.730166	0.37706	6.36689	10.5616	7.62292	2.34667	9.13107	5.59312	8.66237	17.4293	6.5	2.5	8	5.5	8.5	18	middle
670	mtr-miR399l		TGCCAAAGGAGAGTTGCCCTG	up	1.90171	0.927295	0.377124	30.9832	58.9209	23.4551	45.5254	23.9691	16.2709	101.91	58.5817	20	48.5	21	16	100	60.5	middle
671	gma-miR399a		TGCCAAAGGAGAGTTGCCCTG	up	1.90171	0.927295	0.377124	30.9832	58.9209	23.4551	45.5254	23.9691	16.2709	101.91	58.5817	20	48.5	21	16	100	60.5	middle
672	ptc-miR6478_R-2		CCGACCTTAGCTCAGTTGG	down	0.660598	-0.598156	0.378321	5.55126	3.66715	5.2774	2.816	8.56038	2.54233	4.58596	3.87317	4.5	3	7.5	2.5	4.5	4	low
673	mtr-miR164a		TGGAGAAGCAGGGCACGTGCA	up	1.13891	0.187649	0.378876	2719.04	3096.73	2734.48	2856.05	2566.59	3149.1	2489.67	3651.43	2331.67	3042.67	2248.67	3096.67	2443	3771	high
674	gma-miR395a_L-1R+1		TGAAGTGTTTGGGGGAACTCC	down	0.353669	-1.49953	0.379198	6.84463	2.42073	0	7.97867	12.5552	0	0	7.26219	0	8.5	11	0	0	7.5	middle
675	ptc-MIR166h-p5_1ss3AG		GGGATGCTGTCTGATTCGAGA	up	1.30145	0.380116	0.379233	82.3646	107.193	73.2973	69.9307	103.866	127.625	64.2034	129.751	62.5	74.5	91	125.5	63	134	middle
676	mtr-MIR5260-p5_1ss10GA		TTAATCAAGAAAATTACACTCG	up	1.42758	0.513574	0.379659	4.53777	6.47803	5.86378	3.75467	3.99484	3.05079	8.15282	8.23049	5	4	3.5	3	8	8.5	low
677	mtr-MIR5204-p5		TCCCTCAAAGGCTTCCAGTATT	down	0.262582	-1.92916	0.381076	7.37517	1.93659	16.4186	0	5.70692	0	0	5.80976	14	0	5	0	0	6	middle
678	sly-miR168b-3p_R+1		CCCGCCTTGCATCAACTGAATA	down	0.367815	-1.44295	0.381272	2.30891	0.849252	2.93189	0	3.99484	0	2.54776	0	2.5	0	3.5	0	2.5	0	low
679	mtr-MIR2674-p5_1ss20AG		TCGGGACAAAAGGTTGCTAGC	down	0.57363	-0.801808	0.381361	72.4947	41.5852	29.3189	69.4614	118.704	64.0666	51.9742	8.71463	25	74	104	63	51	9	middle
680	mtr-miR172b		AGAATCTTGATGATGCTGCAT	down	0.886372	-0.174016	0.382223	5966.71	5288.73	5830.36	6438.01	5631.78	6474.29	4873.52	4518.38	4971.5	6858.67	4934.17	6366.5	4782.17	4666.33	high
681	PC-5p-68004_75		TCTATGTTTTGCTCTGTTACT	down	0.377363	-1.40598	0.383577	6.09941	2.30169	11.7276	6.57067	0	0	2.54776	4.35732	10	7	0	0	2.5	4.5	middle
682	PC-3p-117289_39		ATCCCACTTTTGAAACGAGACATG	down	0.254615	-1.97361	0.384674	9.31931	2.37284	21.1096	0	6.84831	7.11852	0	0	18	0	6	7	0	0	middle
683	PC-3p-123208_37		TCGGTGGGGATAACTGATCTC	up	2.38905	1.25644	0.384909	7.30197	17.4447	8.2093	0	13.6966	0	30.0635	22.2707	7	0	12	0	29.5	23	middle
684	PC-3p-114425_40		GTTAGCCCATTGAGAGGTCCCTGC	up	3.11412	1.63882	0.385196	2.73643	8.52157	8.2093	0	0	8.13545	0	17.4293	7	0	0	8	0	18	middle
685	pla-MIR11607-p3_2ss5TA19CG		TCACACGGTTGTCTGACAGACT	down	0.217255	-2.20254	0.386104	7.42823	1.61382	17.5913	4.69334	0	0	0	4.84146	15	5	0	0	0	5	middle
686	mtr-MIR2670b-p5_1ss6AC		TCGGGCTAAAATAGTGAGTAGC	down	0.677919	-0.560814	0.386127	9.63412	6.53116	9.38205	12.672	6.84831	11.6947	3.05731	4.84146	8	13.5	6	11.5	3	5	middle
687	mtr-miR167a_L+1_1ss22AG		CTGAAGCTGCCAGCATGATCTG	down	0.681705	-0.552781	0.386509	67.89	46.2809	56.8787	105.131	41.6605	42.7111	63.6939	32.4378	48.5	112	36.5	42	62.5	33.5	middle
688	PC-5p-77458_65		AAATGATTCATCAATAGGTGC	up	2.94034	1.55598	0.386596	1.17276	3.4483	3.51827	0	0	0	3.56686	6.77805	3	0	0	0	3.5	7	low
689	mtr-miR5248_L-2R+2		TTTAGTTGGCATGCATTCAAG	down	0.869126	-0.202363	0.386978	125.684	109.235	125.485	151.125	100.442	97.6254	109.044	121.037	107	161	88	96	107	125	middle
690	mtr-MIR2614-p3_1ss14AG		ATAGTTCGGTTCGGCTCGTTAGGT	up	2.84048	1.50613	0.38735	4.22768	12.0086	0	4.69334	7.98969	24.4063	0	11.6195	0	5	7	24	0	12	middle
691	PC-3p-66368_77		TTGTCCAAACTATAGTCTTAA	up	2.15358	1.10674	0.389415	5.47286	11.7862	16.4186	0	0	14.237	15.7961	5.32561	14	0	0	14	15.5	5.5	middle
692	PC-3p-12388_384		TCGTGCACTGAATCTCTTTTA	down	0.670383	-0.576942	0.389809	32.3417	21.6814	31.6644	48.8107	16.5501	14.237	18.8534	31.9537	27	52	14.5	14	18.5	33	middle
693	mtr-miR2670e_L-1R+1_1ss3TC		CCCAACAGGACGGATCACTAT	down	0.61174	-0.70901	0.390094	46.1037	28.2035	31.6644	76.9707	29.676	38.6434	9.17192	36.7951	27	82	26	38	9	38	middle
694	mes-miR156a_R+1		TGACAGAAGAGAGTGAGCACC	up	2.0064	1.00461	0.390702	87.3264	175.212	114.93	64.2987	82.7504	65.0836	332.737	127.815	98	68.5	72.5	64	326.5	132	middle
695	mtr-miR1510a-3p_R+2_1ss1CA		AGGAGGATTAGGTAAAACAACTT	up	1.497	0.58207	0.390776	6.85955	10.2687	6.45016	3.28534	10.8431	11.1862	5.09551	14.5244	5.5	3.5	9.5	11	5	15	middle
696	PC-3p-127901_35		TTAGGCATGTTAGCACCAAAC	down	0.243717	-2.03672	0.39145	4.17259	1.01693	0	2.816	9.70177	3.05079	0	0	0	3	8.5	3	0	0	low
697	PC-5p-385960_6		TCAACGTCCCTTCCAATTCGG	up	2.80375	1.48736	0.392484	0.951153	2.6668	0	0	2.85346	0	5.09551	2.90488	0	0	2.5	0	5	3	low
698	mtr-miR2612_L+2R-2		TTTGATAGTGTCAACTAGTAC	down	0.342336	-1.54652	0.392811	5.65698	1.93659	0	11.264	5.70692	0	0	5.80976	0	12	5	0	0	6	middle
699	stu-MIR6026-p3_2ss7TA19CA		TGGTAAAACAACTATTGCAAA	down	0.591796	-0.756828	0.393115	11.3667	6.72677	4.10465	11.7333	18.2621	11.1862	5.60506	3.38902	3.5	12.5	16	11	5.5	3.5	middle
700	PC-3p-27780_182		AAGCATCGTGACATTGTGATTGGC	up	1.47943	0.565039	0.393308	8.9396	13.2255	6.45016	6.10134	14.2673	9.66084	9.68147	20.3341	5.5	6.5	12.5	9.5	9.5	21	middle
701	PC-5p-213866_15		AGTAAAAATAGGTCAACATAAGTT	down	0.211009	-2.24462	0.393392	4.01614	0.847442	0	2.34667	9.70177	2.54233	0	0	0	2.5	8.5	2.5	0	0	low
702	vvi-miR166a_L+5_1ss20AG		TGATTTCGGACCAGGCTTCGTTCC	up	1.43781	0.523873	0.393682	21.6166	31.0806	20.5232	14.08	30.2467	27.9656	46.8787	18.3976	17.5	15	26.5	27.5	46	19	middle
703	PC-3p-6656_662		CATTCTATATTTTCTCCCACC	down	0.571179	-0.807984	0.394027	98.8814	56.479	145.422	129.536	21.6863	59.9989	29.554	79.8841	124	138	19	59	29	82.5	middle
704	PC-5p-67284_76		ATGTGGGTATTGTATCCAGCCAAA	up	1.66129	0.732304	0.394277	18.8029	31.237	5.86378	32.8534	17.6915	13.2201	31.5922	48.8988	5	35	15.5	13	31	50.5	middle
705	PC-3p-274493_10		CAATGTCAATAATTCTATGTCGCC	down	0.310306	-1.68823	0.395993	2.73682	0.849252	5.86378	2.34667	0	0	2.54776	0	5	2.5	0	0	2.5	0	low
706	ptc-MIR166h-p5		GGAATGCTGTCTGATTCGAGA	down	0.550822	-0.860342	0.396153	22.8211	12.5704	15.2458	17.8347	35.3829	0	8.66237	29.0488	13	19	31	0	8.5	30	middle
707	mtr-MIR2620-p3_1ss4TC		TGACGAAGACCTCCCAGCGGA	down	0.390177	-1.3578	0.396475	2.89529	1.12967	4.69103	0	3.99484	0	0	3.38902	4	0	3.5	0	0	3.5	low
708	PC-5p-36801_139		ATTAAATCTGAACCACACATTGCC	up	1.2515	0.323659	0.397383	18.8773	23.625	17.5913	25.344	13.6966	27.4571	16.3056	27.1122	15	27	12	27	16	28	middle
709	mtr-MIR2648-p3_1ss10CT		TTCTGTCATTTCCATTGTGTT	down	0.639883	-0.644119	0.397654	12.9907	8.31253	9.38205	13.6107	15.9794	14.237	10.7006	0	8	14.5	14	14	10.5	0	middle
710	mtr-MIR399d-p5		GGGCATGTCTCTATTGGCAGG	up	inf	inf	0.399311	0	13.5598	0	0	0	0	39.0656	1.61382	0	0	0	0	38.3333	1.66667	middle
711	mtr-MIR399n-p5		GGGCATGTCTCTATTGGCAGG	up	inf	inf	0.399311	0	13.5598	0	0	0	0	39.0656	1.61382	0	0	0	0	38.3333	1.66667	middle
712	mtr-MIR399o-p5		GGGCATGTCTCTATTGGCAGG	up	inf	inf	0.399311	0	13.5598	0	0	0	0	39.0656	1.61382	0	0	0	0	38.3333	1.66667	middle
713	ptc-miR168a-3p_R+1_1ss9GT		CCCGCCTTTCATCAACTGAATT	up	1.45298	0.539014	0.399965	85.7147	124.542	93.8205	20.6507	142.673	115.93	157.961	99.7341	80	22	125	114	155	103	middle
714	PC-3p-34630_147		TTGCAGGTCGAGAATAAAATC	up	1.93741	0.954129	0.400591	13.9957	27.1154	5.86378	22.9973	13.1259	17.2878	12.7388	51.3195	5	24.5	11.5	17	12.5	53	middle
715	PC-3p-139061_31		TAAACGAGAAACTTTTGACGAAGA	down	0.457834	-1.1271	0.40332	7.93974	3.63509	0	11.264	12.5552	0	5.09551	5.80976	0	12	11	0	5	6	middle
716	PC-5p-25028_200		TTGATGTGATCGATGGGGCCCACA	down	0.762295	-0.391578	0.404945	12.8033	9.75989	13.4867	14.08	10.8431	10.1693	4.58596	14.5244	11.5	15	9.5	10	4.5	15	middle
717	PC-5p-1800_1921		CACACTTTCTTTAAAGCAGCC	up	1.29242	0.370077	0.405932	102.65	132.668	119.035	84.48	104.437	100.168	108.534	189.301	101.5	90	91.5	98.5	106.5	195.5	middle
718	mtr-miR398a-5p_1ss22GC		GGAGTGACACTGAGAACACAAC	up	10.2461	3.357	0.406705	30.4185	311.67	83.2657	0	7.98969	56.9481	850.95	27.1122	71	0	7	56	835	28	middle
719	PC-3p-17664_277		CTGTGTTTTTCTTGATTAAAG	down	0.684835	-0.546171	0.406776	19.4898	13.3473	12.3139	26.752	19.4035	16.2709	20.382	3.38902	10.5	28.5	17	16	20	3.5	middle
720	mtr-MIR5283-p3_2ss11CT20AG		TTGGATACTCTCCGGATACGTATC	up	2.52988	1.33907	0.407513	1.56445	3.95785	0	4.69334	0	0	5.09551	6.77805	0	5	0	0	5	7	middle
721	mtr-MIR5230-p5_1ss8CG		TTGTAGAGAAATGTGGAGGGT	down	0.40084	-1.3189	0.407564	2.11868	0.849252	2.93189	0	3.42415	0	2.54776	0	2.5	0	3	0	2.5	0	low
722	PC-3p-153886_27		TAGAGTAGATTCCTTGTACCCACA	down	0.40084	-1.3189	0.407564	4.23736	1.6985	5.86378	0	6.84831	0	5.09551	0	5	0	6	0	5	0	low
723	mtr-miR171c		TGATTGAGCCGTGCCAATATT	down	0.87076	-0.199653	0.408134	178.964	155.835	161.505	203.691	171.697	189.149	117.342	161.013	137.714	217	150.429	186	115.143	166.286	middle
724	PC-3p-65815_78		AAAGAGACAAGAAAACAAAGGT	up	1.34065	0.422931	0.409456	9.18976	12.3202	9.38205	5.632	12.5552	16.2709	7.13371	13.5561	8	6	11	16	7	14	middle
725	PC-3p-44403_116		AGTAAGGTTGTCACAAAAGTTGTC	down	0.864889	-0.209412	0.410941	7.90839	6.83988	6.45016	9.85601	7.419	7.62698	6.11461	6.77805	5.5	10.5	6.5	7.5	6	7	low
726	mtr-miR7696a-3p		TTGAATTATGAGAACTTGAAG	up	1.20853	0.273254	0.411067	3182.78	3846.49	4120.87	3082.11	2345.35	4613.31	4041.93	2884.22	3513.83	3283.5	2054.83	4536.5	3966.17	2978.67	high
727	PC-3p-98358_49		CAAGATTGCCTCTAGTTCTAA	up	2.12933	1.0904	0.411337	6.02215	12.8231	5.86378	12.2027	0	24.9148	9.68147	3.87317	5	13	0	24.5	9.5	4	middle
728	mtr-MIR2086-p3_1ss19CT		AGGGACATGAATGCAGAATTGG	down	0.68569	-0.544371	0.414678	17.8237	12.2215	24.6279	19.712	9.13107	12.2032	5.09551	19.3659	21	21	8	12	5	20	middle
729	mtr-miR167b-5p		TGAAGCTGCCAGCATGATCTG	down	0.885944	-0.174712	0.415294	13172.2	11669.8	14882.5	12509.5	12124.5	11925.9	13906.8	9176.67	12690.2	13326.8	10622.7	11727.3	13646.2	9477.17	high
730	gma-miR167c		TGAAGCTGCCAGCATGATCTG	down	0.885944	-0.174712	0.415294	13172.2	11669.8	14882.5	12509.5	12124.5	11925.9	13906.8	9176.67	12690.2	13326.8	10622.7	11727.3	13646.2	9477.17	high
731	lja-miR397_L-2R+2		TTGAGTGCAGCGTTGATGAAA	down	0.25881	-1.95004	0.415439	15.0873	3.90475	36.9418	3.75467	4.56554	2.54233	9.17192	0	31.5	4	4	2.5	9	0	middle
732	PC-3p-309658_7		AGATCATCGTGATTCTGAGATACC	down	0.40979	-1.28704	0.416077	4.14482	1.6985	5.86378	6.57067	0	0	5.09551	0	5	7	0	0	5	0	low
733	PC-3p-65745_78		AACTTAACCACCAAGTAGACTTGG	up	1.42002	0.505914	0.416932	3.98517	5.65903	4.10465	3.28534	4.56554	8.13545	2.54776	6.2939	3.5	3.5	4	8	2.5	6.5	low
734	mtr-MIR2630q-p3		TTACAAGGACTAAAACAAAATACC	down	0.720271	-0.473389	0.41933	26.2429	18.902	20.0262	40.5165	18.1861	17.0021	24.3404	15.3636	17.0762	43.1639	15.9333	16.719	23.8841	15.8667	middle
735	mtr-MIR2630p-p3		TTACAAGGACTAAAACAAAATACC	down	0.720271	-0.473389	0.41933	26.2429	18.902	20.0262	40.5165	18.1861	17.0021	24.3404	15.3636	17.0762	43.1639	15.9333	16.719	23.8841	15.8667	middle
736	mtr-MIR2630i-p3		TTACAAGGACTAAAACAAAATACC	down	0.720271	-0.473389	0.41933	26.2429	18.902	20.0262	40.5165	18.1861	17.0021	24.3404	15.3636	17.0762	43.1639	15.9333	16.719	23.8841	15.8667	middle
737	mtr-MIR2630n-p3		TTACAAGGACTAAAACAAAATACC	down	0.720271	-0.473389	0.41933	26.2429	18.902	20.0262	40.5165	18.1861	17.0021	24.3404	15.3636	17.0762	43.1639	15.9333	16.719	23.8841	15.8667	middle
738	mtr-MIR2630v-p3		TTACAAGGACTAAAACAAAATACC	down	0.720271	-0.473389	0.41933	26.2429	18.902	20.0262	40.5165	18.1861	17.0021	24.3404	15.3636	17.0762	43.1639	15.9333	16.719	23.8841	15.8667	middle
739	PC-3p-7492_597		TTGCAGGTCGAGAATAAAATT	up	1.20038	0.263494	0.420048	43.1636	51.8128	51.6013	43.648	34.2415	52.3719	37.7068	65.3598	44	46.5	30	51.5	37	67.5	middle
740	mtr-MIR5281a-p3		AGTAAATTGTCTCTTGTAAATAGG	down	0.879961	-0.184488	0.422149	70.7356	62.2446	58.3446	77.6747	76.1874	48.3042	72.1015	66.328	49.75	82.75	66.75	47.5	70.75	68.5	middle
741	stu-miR166d-5p_L-1R+2_1ss5TC		GAACGTCGTCTGGTTCGAGATT	up	1.33285	0.414518	0.422389	100.741	134.272	121.967	84.9494	95.3056	117.456	198.215	87.1463	104	90.5	83.5	115.5	194.5	90	middle
742	cpa-MIR156f-p3		GCTCTCTATGCTTCTGTCATC	up	inf	inf	0.42265	0	1.6985	0	0	0	0	5.09551	0	0	0	0	0	5	0	low
746	rco-MIR171a-p5		GGATATTGGTCCGGTTCAATA	up	inf	inf	0.42265	0	1.61382	0	0	0	0	0	4.84146	0	0	0	0	0	5	low
748	mtr-miR399d_L+1R-1		TTGCCAAAGGAGAGCTGCCCT	up	inf	inf	0.42265	0	2.3779	0	0	0	0	7.13371	0	0	0	0	0	7	0	low
749	mtr-MIR399c-p5		GGGAAAATCTCTTTTGGCAGA	up	inf	inf	0.42265	0	4.07641	0	0	0	0	12.2292	0	0	0	0	0	12	0	middle
750	mtr-MIR399h-p5		GAGCAAATCTCTATTGGCAGA	up	inf	inf	0.42265	0	2.0382	0	0	0	0	6.11461	0	0	0	0	0	6	0	low
751	mdm-MIR2111a-p3		GTCCTTGGGATGCAGATTACC	up	inf	inf	0.42265	0	3.73671	0	0	0	0	11.2101	0	0	0	0	0	11	0	middle
752	mtr-MIR2111j-p3_1ss7AG		AACCTTGGAATGCAGATTATC	up	inf	inf	0.42265	0	0.677954	0	0	0	2.03386	0	0	0	0	0	2	0	0	low
753	mtr-MIR2119-p5		TTGATTGGAAATAAAGAGAGA	up	inf	inf	0.42265	0	3.39701	0	0	0	0	10.191	0	0	0	0	0	10	0	middle
754	mtr-MIR2592aj-p3_2ss8TA20GA		AAGACAAATGTTGTAGTTGAAATG	up	inf	inf	0.42265	0	0.339701	0	0	0	0	1.0191	0	0	0	0	0	1	0	low
755	mtr-miR2601_L+1R+1		TTATTTGGTATCGCTTTGGTCCCT	up	inf	inf	0.42265	0	5.80976	0	0	0	0	0	17.4293	0	0	0	0	0	18	middle
757	mtr-MIR2638b-p3_2ss11TC18TC		TCGCTAATGACAGCCCACCTCAGC	up	inf	inf	0.42265	0	0.968293	0	0	0	0	0	2.90488	0	0	0	0	0	3	low
763	mtr-MIR5266-p5		TGGCTGGGGGACTGTCTGG	up	inf	inf	0.42265	0	4.84146	0	0	0	0	0	14.5244	0	0	0	0	0	15	middle
766	mtr-MIR5745a-p5_1ss22AG		CATCCAATGATGTGTTTCCACGTC	up	inf	inf	0.42265	0	1.69488	0	0	0	5.08465	0	0	0	0	0	5	0	0	low
767	stu-MIR8005c-p3_1ss12AG		TAGGGTTTAGGGTTTAGGGTT	up	inf	inf	0.42265	0	1.12967	0	0	0	0	0	3.38902	0	0	0	0	0	3.5	low
768	stu-MIR8005a-p5_1ss12AG		TAGGGTTTAGGGTTTAGGGTT	up	inf	inf	0.42265	0	1.12967	0	0	0	0	0	3.38902	0	0	0	0	0	3.5	low
769	stu-MIR8005a-p3_1ss11AG		AGGGTTTAGGGTTTAGGGTTT	up	inf	inf	0.42265	0	1.12967	0	0	0	0	0	3.38902	0	0	0	0	0	3.5	low
773	ptc-miR399i		TGCCAAAGGAGAGTTGCCCTA	up	inf	inf	0.42265	0	1.93659	0	0	0	0	0	5.80976	0	0	0	0	0	6	low
774	mtr-miR530_L-2		CATTTGCACCTGCACTTTC	up	inf	inf	0.42265	0	2.88746	0	0	0	0	8.66237	0	0	0	0	0	8.5	0	middle
775	vvi-MIR2111-p5_1ss13AC		ATCTGCATCCTGCGGTCTAGA	up	inf	inf	0.42265	0	0.849252	0	0	0	0	2.54776	0	0	0	0	0	2.5	0	low
776	lja-MIR2111-p3_1ss4TA		TAGACCTTAGGATGCAGATTA	up	inf	inf	0.42265	0	2.3779	0	0	0	0	7.13371	0	0	0	0	0	7	0	low
777	gma-miR2118a-3p_R+1		TTGCCGATTCCACCCATTCCTA	up	inf	inf	0.42265	0	1.0191	0	0	0	0	3.05731	0	0	0	0	0	3	0	low
778	mtr-MIR2599-p5_1ss8AG		AAAACATGTGGGTACAAGGAATCT	up	inf	inf	0.42265	0	2.0382	0	0	0	0	6.11461	0	0	0	0	0	6	0	low
779	mtr-miR2600e_2ss11GA23GA		AAGCATTGTGACATTGTGATTGAC	up	inf	inf	0.42265	0	1.6985	0	0	0	0	5.09551	0	0	0	0	0	5	0	low
780	mtr-miR2612		TGATAGTGTCAACTAGTACAG	up	inf	inf	0.42265	0	1.93659	0	0	0	0	0	5.80976	0	0	0	0	0	6	low
781	mtr-MIR2612-p3_1ss5AG		GATAGGTTTTATGTAGTAGTTGAC	up	inf	inf	0.42265	0	0.847442	0	0	0	2.54233	0	0	0	0	0	2.5	0	0	low
782	gma-miR5559_L-1R+2		ACTTGGTGAATTGTTGGATCAC	up	inf	inf	0.42265	0	5.09551	0	0	0	0	15.2865	0	0	0	0	0	15	0	middle
784	gra-MIR8686-p3_2ss12AT17CA		TTGCCTCTAGTTCTAAAAT	up	inf	inf	0.42265	0	2.71761	0	0	0	0	8.15282	0	0	0	0	0	8	0	low
786	vvi-MIR156a-p3_1ss5TC		TCTCCCTTCTTCTGTCATCATC	up	inf	inf	0.42265	0	1.5254	0	0	0	4.57619	0	0	0	0	0	4.5	0	0	low
787	gma-miR394a-5p_L+1_1ss21CT		TTTGGCATTCTGTCCACCTCT	up	inf	inf	0.42265	0	1.7752	0	0	0	0	0	5.32561	0	0	0	0	0	5.5	low
788	gma-miR394a-5p_L+2_2		TTTTGGCATTCTGTCCACCTCC	up	inf	inf	0.42265	0	2.7435	0	0	0	0	0	8.23049	0	0	0	0	0	8.5	low
789	gma-miR394a-5p_L+2_1		CTTTGGCATTCTGTCCACCTCC	up	inf	inf	0.42265	0	2.7435	0	0	0	0	0	8.23049	0	0	0	0	0	8.5	low
790	mtr-MIR1510b-p3_1		GAGTCACATGGTCGGTATCCC	up	inf	inf	0.42265	0	0.849252	0	0	0	0	2.54776	0	0	0	0	0	2.5	0	low
791	mtr-MIR1510b-p3_3		TGGAATGGAGGATCAGGTAAA	up	inf	inf	0.42265	0	0.849252	0	0	0	0	2.54776	0	0	0	0	0	2.5	0	low
792	mtr-MIR1510b-p3_2		TAGAGTCACATGGTCGGTATC	up	inf	inf	0.42265	0	0.849252	0	0	0	0	2.54776	0	0	0	0	0	2.5	0	low
793	mtr-miR1510a-5p_L-1R-1_1ss20CT		TGTCTTACCCATTCCTCCT	up	inf	inf	0.42265	0	0.806911	0	0	0	0	0	2.42073	0	0	0	0	0	2.5	low
795	lja-miR1511-3p_R-3_1ss1AT		TACCAGGCTCTGATACCATGA	up	inf	inf	0.42265	0	1.0191	0	0	0	0	3.05731	0	0	0	0	0	3	0	low
797	mtr-MIR2586a-p5_2ss9GA20GA		GAAGCACGAATACGGACACAGACA	up	inf	inf	0.42265	0	1.12967	0	0	0	0	0	3.38902	0	0	0	0	0	3.5	low
798	mtr-MIR2586a-p3_2ss2AG22AG		AGGTGTCGGTGTCATGTCGGTGTC	up	inf	inf	0.42265	0	0.806911	0	0	0	0	0	2.42073	0	0	0	0	0	2.5	low
799	mtr-MIR2586a-p3_2ss9GA20GA		GAAGCACGAATACGGACACAGACA	up	inf	inf	0.42265	0	1.12967	0	0	0	0	0	3.38902	0	0	0	0	0	3.5	low
800	mtr-MIR2586a-p5_2ss10AG24AC		ACACGACACGGACACGCCGACACC	up	inf	inf	0.42265	0	1.61382	0	0	0	0	0	4.84146	0	0	0	0	0	5	low
807	mtr-miR2670a_L+2R-1_1ss9GT		TCCAAGAATGTTGCTCACTATT	up	inf	inf	0.42265	0	1.0191	0	0	0	0	3.05731	0	0	0	0	0	3	0	low
809	mtr-MIR5275-p3_2ss3TA18AG		CTAAAGGCTCAGGAAAAGGAA	up	inf	inf	0.42265	0	1.12967	0	0	0	0	0	3.38902	0	0	0	0	0	3.5	low
810	mtr-MIR5742-p5_2ss7AG21GA		ACATCAGTGGTCGTTGGATCAAGA	up	inf	inf	0.42265	0	1.69488	0	0	0	5.08465	0	0	0	0	0	5	0	0	low
811	gma-MIR6300-p5_2ss14AC20TC		GTAGTATAGTGGTCAGTATCCC	up	inf	inf	0.42265	0	4.06772	0	0	0	12.2032	0	0	0	0	0	12	0	0	middle
812	gma-MIR6300-p5_2ss7AT18TA_1		TGTAGTTTAGTGGTAAGAATTC	up	inf	inf	0.42265	0	1.86437	0	0	0	5.59312	0	0	0	0	0	5.5	0	0	middle
813	gma-MIR6300-p5_2ss7AT18TA_2		TGTAGTTTAGTGGTAAGAATTCC	up	inf	inf	0.42265	0	1.86437	0	0	0	5.59312	0	0	0	0	0	5.5	0	0	middle
814	gma-MIR6300-p3_2ss7AT18TA		TGTAGTTTAGTGGTAAGAATTCC	up	inf	inf	0.42265	0	1.86437	0	0	0	5.59312	0	0	0	0	0	5.5	0	0	middle
815	ppe-miR1511-3p_L+1R-1_1ss5TA		AACCAGGCTCTGATACCATAA	up	inf	inf	0.42265	0	0.847442	0	0	0	2.54233	0	0	0	0	0	2.5	0	0	low
819	lja-miR11136-3p_L+2R-2		TTGATAATTGTTGGGATTTTGG	up	inf	inf	0.42265	0	4.75581	0	0	0	0	14.2674	0	0	0	0	0	14	0	middle
820	PC-5p-259640_11		TTAGGACTATAGTTTGGACAATTT	up	inf	inf	0.42265	0	1.86835	0	0	0	0	5.60506	0	0	0	0	0	5.5	0	low
822	PC-3p-372781_6		AATTGTGCTTGCAATCGGGATGCA	up	inf	inf	0.42265	0	1.93659	0	0	0	0	0	5.80976	0	0	0	0	0	6	low
824	PC-5p-482601_5		ATAACCAATCAAAACATTCTGAAT	up	inf	inf	0.42265	0	0.849252	0	0	0	0	2.54776	0	0	0	0	0	2.5	0	low
825	PC-3p-350921_6		AGAATGTTTCGATCGGTTGTGTGT	up	inf	inf	0.42265	0	1.0191	0	0	0	0	3.05731	0	0	0	0	0	3	0	low
829	PC-3p-384318_6		TGGATAATAAAAACTCATAGA	up	inf	inf	0.42265	0	2.03386	0	0	0	6.10158	0	0	0	0	0	6	0	0	low
831	PC-3p-251108_12		GATACATCAGTTACTCAGTGAACC	up	inf	inf	0.42265	0	1.18895	0	0	0	0	3.56686	0	0	0	0	0	3.5	0	low
832	PC-5p-215677_15		TCAAGTGCTAGTGCAAATCTC	up	inf	inf	0.42265	0	0.847442	0	0	0	2.54233	0	0	0	0	0	2.5	0	0	low
835	PC-3p-263236_11		GATTTTGGTATCAGAAATTAGAGA	up	inf	inf	0.42265	0	1.0191	0	0	0	0	3.05731	0	0	0	0	0	3	0	low
838	PC-3p-387796_5		CAACAGTCACCAACGTGCTGAC	up	inf	inf	0.42265	0	1.69488	0	0	0	5.08465	0	0	0	0	0	5	0	0	low
839	PC-5p-253541_11		TTATCAACAGGTAGCGGGTTAC	up	inf	inf	0.42265	0	0.847442	0	0	0	2.54233	0	0	0	0	0	2.5	0	0	low
840	PC-3p-208862_16		CTTGTAACCCGCTGCCTGTTGA	up	inf	inf	0.42265	0	2.8813	0	0	0	8.64391	0	0	0	0	0	8.5	0	0	middle
841	PC-5p-223351_14		TGCATCCGGGGCACTCTTTAAGCA	up	inf	inf	0.42265	0	2.25935	0	0	0	0	0	6.77805	0	0	0	0	0	7	low
842	PC-3p-435570_5		AATGCTTAAAGAGTGTCCCGGGGA	up	inf	inf	0.42265	0	1.61382	0	0	0	0	0	4.84146	0	0	0	0	0	5	low
843	PC-3p-245499_12		AAAGTTATTTTGAACCGTCAACCC	up	inf	inf	0.42265	0	1.01693	0	0	0	3.05079	0	0	0	0	0	3	0	0	low
844	PC-5p-241265_12		GAAGAGACATGGAAGTCATGGTAC	up	inf	inf	0.42265	0	1.18642	0	0	0	3.55926	0	0	0	0	0	3.5	0	0	low
845	PC-5p-325761_7		GCAACATTTAGGACTAGTCAACAC	up	inf	inf	0.42265	0	1.18642	0	0	0	3.55926	0	0	0	0	0	3.5	0	0	low
846	PC-5p-299556_8		AGAATGTAGCGTGTTCCTTGT	up	inf	inf	0.42265	0	1.12967	0	0	0	0	0	3.38902	0	0	0	0	0	3.5	low
847	PC-3p-197721_18		TATGAGTGATATCGGCACCAA	up	inf	inf	0.42265	0	3.05079	0	0	0	9.15238	0	0	0	0	0	9	0	0	low
848	PC-5p-295982_8		GTGACATTGTGACATTGGCCAACC	up	inf	inf	0.42265	0	2.09797	0	0	0	0	0	6.2939	0	0	0	0	0	6.5	low
849	PC-3p-82154_61		CGATCCAACGACTACTGATGT	up	inf	inf	0.42265	0	3.89823	0	0	0	11.6947	0	0	0	0	0	11.5	0	0	middle
850	PC-3p-482470_5		AAAAAACACACACTACCTACT	up	inf	inf	0.42265	0	0.806911	0	0	0	0	0	2.42073	0	0	0	0	0	2.5	low
852	PC-5p-448617_5		AGATTCAGTGACTTTAAGGTGGGA	up	inf	inf	0.42265	0	0.847442	0	0	0	2.54233	0	0	0	0	0	2.5	0	0	low
853	PC-5p-230868_13		AACTGTAGCAGTTTTGGCCCCAAG	up	inf	inf	0.42265	0	1.12967	0	0	0	0	0	3.38902	0	0	0	0	0	3.5	low
854	PC-3p-277747_10		CATTTGACTAGCGTTTGACCCACT	up	inf	inf	0.42265	0	1.6985	0	0	0	0	5.09551	0	0	0	0	0	5	0	low
857	PC-5p-409838_5		AAAGACAGGTTGGTGCTGAAA	up	inf	inf	0.42265	0	0.847442	0	0	0	2.54233	0	0	0	0	0	2.5	0	0	low
858	PC-3p-296981_8		TCACTACAAATGCTACAAATC	up	inf	inf	0.42265	0	2.58211	0	0	0	0	0	7.74634	0	0	0	0	0	8	low
859	PC-5p-357541_6		ATCTCTAAGGTCTCTTAAATACGC	up	inf	inf	0.42265	0	1.7752	0	0	0	0	0	5.32561	0	0	0	0	0	5.5	low
860	PC-3p-193489_18		ATAGAATTCTGAATTCGAAT	up	inf	inf	0.42265	0	1.01693	0	0	0	3.05079	0	0	0	0	0	3	0	0	low
861	PC-5p-347676_6		TGCTCCGGAGGCACTGGTTAAGGA	up	inf	inf	0.42265	0	2.03386	0	0	0	6.10158	0	0	0	0	0	6	0	0	low
862	PC-3p-167454_23		GACGAGGGACCTAATTGAGAAACT	up	inf	inf	0.42265	0	1.12967	0	0	0	0	0	3.38902	0	0	0	0	0	3.5	low
863	PC-5p-500659_5		TGTCCTCGGGGCACTCTTTAAGCA	up	inf	inf	0.42265	0	1.61382	0	0	0	0	0	4.84146	0	0	0	0	0	5	low
865	PC-5p-305628_7		ATGTCACAATGTCTCTCAGTCACC	up	inf	inf	0.42265	0	1.18895	0	0	0	0	3.56686	0	0	0	0	0	3.5	0	low
866	PC-3p-443742_5		TCTGTTCCTCGACCCAAACCA	up	inf	inf	0.42265	0	1.61382	0	0	0	0	0	4.84146	0	0	0	0	0	5	low
868	PC-5p-377639_6		CATCCTATGAGGTTCTCACGCGCC	up	inf	inf	0.42265	0	2.03386	0	0	0	6.10158	0	0	0	0	0	6	0	0	low
869	PC-3p-354917_6		ACGTGCGAGAAACTCATAGGATGG	up	inf	inf	0.42265	0	1.93659	0	0	0	0	0	5.80976	0	0	0	0	0	6	low
870	PC-5p-258664_11		AGGGGCGACCTGAGAACACATGAG	up	inf	inf	0.42265	0	1.01693	0	0	0	3.05079	0	0	0	0	0	3	0	0	low
871	PC-3p-251874_12		TAGAATTCTGAATTCGATA	up	inf	inf	0.42265	0	0.849252	0	0	0	0	2.54776	0	0	0	0	0	2.5	0	low
875	PC-3p-225534_14		AATTCCCTTTGGGCACTCGTTAGC	up	inf	inf	0.42265	0	3.87317	0	0	0	0	0	11.6195	0	0	0	0	0	12	middle
876	PC-5p-370139_6		ATGGAGTGGTAGTTCTGACAAAGC	up	inf	inf	0.42265	0	1.93659	0	0	0	0	0	5.80976	0	0	0	0	0	6	low
879	PC-3p-253715_11		CTTGATTCGGATAATTTGGAA	up	inf	inf	0.42265	0	1.0191	0	0	0	0	3.05731	0	0	0	0	0	3	0	low
881	PC-5p-211359_16		CGTAATTACTTGAATTTGAAGACA	up	inf	inf	0.42265	0	2.58211	0	0	0	0	0	7.74634	0	0	0	0	0	8	low
882	PC-5p-249662_12		GGGATTTGAAGTGAATATCTT	up	inf	inf	0.42265	0	2.03386	0	0	0	6.10158	0	0	0	0	0	6	0	0	low
884	PC-5p-269424_10		AAAGTTAAATGAGGGACACGTGTC	up	inf	inf	0.42265	0	1.61382	0	0	0	0	0	4.84146	0	0	0	0	0	5	low
887	PC-5p-365574_6		GTTTGATTTGGTTATTGGTTT	up	inf	inf	0.42265	0	1.0191	0	0	0	0	3.05731	0	0	0	0	0	3	0	low
888	PC-3p-437557_5		TNTGGGATCGGAAATTAGAGA	up	inf	inf	0.42265	0	3.38977	0	0	0	10.1693	0	0	0	0	0	10	0	0	middle
890	PC-5p-27846_181		ATACTTAGGGAATGATTGGTA	up	inf	inf	0.42265	0	4.74568	0	0	0	14.237	0	0	0	0	0	14	0	0	middle
891	PC-3p-231742_13		TTAAAGGACTTGTCTGTAACC	up	inf	inf	0.42265	0	2.20335	0	0	0	6.61005	0	0	0	0	0	6.5	0	0	low
892	PC-5p-273447_10		TCTGGGGGACTGGTTAAGGAAGCC	up	inf	inf	0.42265	0	0.806911	0	0	0	0	0	2.42073	0	0	0	0	0	2.5	low
893	PC-3p-306023_7		ATTTGTTCTCTTAACCAGTGCCCC	up	inf	inf	0.42265	0	2.25935	0	0	0	0	0	6.77805	0	0	0	0	0	7	low
894	PC-5p-435322_5		TGTCTCCGGGGCACTCTTTAAGCC	up	inf	inf	0.42265	0	1.61382	0	0	0	0	0	4.84146	0	0	0	0	0	5	low
895	PC-3p-454179_5		AAAGATCTTAAAGAGTGCCCCGGG	up	inf	inf	0.42265	0	1.61382	0	0	0	0	0	4.84146	0	0	0	0	0	5	low
896	PC-3p-235734_13		ATTGTCTGGTCTGAATTCAACGGT	up	inf	inf	0.42265	0	1.29106	0	0	0	0	0	3.87317	0	0	0	0	0	4	low
897	PC-5p-162928_24		TTTCAAATTGCGGTAATGAGC	up	inf	inf	0.42265	0	0.849252	0	0	0	0	2.54776	0	0	0	0	0	2.5	0	low
898	PC-5p-53111_97		TGTGACAAACATGAATGCATT	up	inf	inf	0.42265	0	4.57619	0	0	0	13.7286	0	0	0	0	0	13.5	0	0	middle
899	PC-5p-234321_13		GTTCGGACACTATATGGCAT	up	inf	inf	0.42265	0	1.01693	0	0	0	3.05079	0	0	0	0	0	3	0	0	low
904	PC-5p-485445_5		CGGTAATTGTTGGATATTACA	up	inf	inf	0.42265	0	1.6985	0	0	0	0	5.09551	0	0	0	0	0	5	0	low
907	PC-3p-279577_10		CTTTCCCACCTTAAAGTCACTGAA	up	inf	inf	0.42265	0	1.61382	0	0	0	0	0	4.84146	0	0	0	0	0	5	low
908	PC-5p-320594_7		CAATGACAGTTAATTGGCGCTGAC	up	inf	inf	0.42265	0	2.03386	0	0	0	6.10158	0	0	0	0	0	6	0	0	low
909	PC-3p-211627_16		AGTCTTGTGGACAATGCATGG	up	inf	inf	0.42265	0	0.968293	0	0	0	0	0	2.90488	0	0	0	0	0	3	low
910	PC-5p-412649_5		CGTTTTCTATTGTCCACAACT	up	inf	inf	0.42265	0	1.69488	0	0	0	5.08465	0	0	0	0	0	5	0	0	low
911	PC-5p-257635_11		GTGTTCTGAGGCACTCTTTAAGCA	up	inf	inf	0.42265	0	1.01693	0	0	0	3.05079	0	0	0	0	0	3	0	0	low
912	PC-3p-240359_12		CGCCAAAGTAGAGTCGCCCTG	up	inf	inf	0.42265	0	1.93659	0	0	0	0	0	5.80976	0	0	0	0	0	6	low
913	PC-3p-258441_11		TTCAATACAAAATTCACATGGGGT	up	inf	inf	0.42265	0	1.86437	0	0	0	5.59312	0	0	0	0	0	5.5	0	0	low
914	PC-3p-228365_14		ATGAGGACCACCTTAAGAAGAAGT	up	inf	inf	0.42265	0	0.968293	0	0	0	0	0	2.90488	0	0	0	0	0	3	low
916	PC-3p-282950_10		AAAGTTGTTTTGAACCGTCGACCC	up	inf	inf	0.42265	0	1.61382	0	0	0	0	0	4.84146	0	0	0	0	0	5	low
917	PC-5p-216635_15		CTAAGGGGTTCTTTTGAATTGGAT	up	inf	inf	0.42265	0	1.93659	0	0	0	0	0	5.80976	0	0	0	0	0	6	low
918	PC-5p-253985_11		TATGTCAGAATCACGATGATGATC	up	inf	inf	0.42265	0	0.968293	0	0	0	0	0	2.90488	0	0	0	0	0	3	low
920	PC-5p-225594_14		AGTGTCCCGGGGCACTCTTTAAGC	up	inf	inf	0.42265	0	4.5187	0	0	0	0	0	13.5561	0	0	0	0	0	14	middle
928	PC-3p-196250_18		TATTGGAGGCTCATTACT	up	inf	inf	0.42265	0	2.03386	0	0	0	6.10158	0	0	0	0	0	6	0	0	low
929	PC-5p-241682_12		ATAGTGCTCTCACTTGATACACCC	up	inf	inf	0.42265	0	1.12967	0	0	0	0	0	3.38902	0	0	0	0	0	3.5	low
930	PC-3p-282550_10		TCACCGTGATTCTGAAATAAC	up	inf	inf	0.42265	0	3.38977	0	0	0	10.1693	0	0	0	0	0	10	0	0	middle
931	PC-3p-164364_24		TTCGTGTTCGTCGCTACTCATC	up	inf	inf	0.42265	0	2.37284	0	0	0	7.11852	0	0	0	0	0	7	0	0	low
932	PC-3p-268651_10		ATGTTCTTAACTTGTGCCCTA	up	inf	inf	0.42265	0	3.39701	0	0	0	0	10.191	0	0	0	0	0	10	0	middle
935	PC-5p-234941_13		TAGTTAACTACCGTTGGGCTAACC	up	inf	inf	0.42265	0	1.6985	0	0	0	0	5.09551	0	0	0	0	0	5	0	low
938	PC-3p-131361_34		TATTTCTGGTGATGATGGGTG	up	inf	inf	0.42265	0	2.71182	0	0	0	8.13545	0	0	0	0	0	8	0	0	middle
940	PC-5p-268756_10		ACTTTTAAGATCGGTTGAACCAGC	up	inf	inf	0.42265	0	1.61382	0	0	0	0	0	4.84146	0	0	0	0	0	5	low
942	PC-3p-184391_20		ACTCTATGTCACCCAAGTGCTATC	up	inf	inf	0.42265	0	2.0382	0	0	0	0	6.11461	0	0	0	0	0	6	0	low
944	PC-3p-236175_13		TGTCTTTCTGGTTGTAGATGTA	up	inf	inf	0.42265	0	2.58211	0	0	0	0	0	7.74634	0	0	0	0	0	8	low
946	PC-5p-361891_6		ATGAGATGTGAAATGAATGTATGT	up	inf	inf	0.42265	0	1.93659	0	0	0	0	0	5.80976	0	0	0	0	0	6	low
948	PC-3p-385492_6		ATTCTGACATATAACTGTGATGCC	up	inf	inf	0.42265	0	3.73671	0	0	0	0	11.2101	0	0	0	0	0	11	0	middle
952	PC-3p-278219_10		AGAAAGGGCTGCCATCGAATCAGT	up	inf	inf	0.42265	0	1.61382	0	0	0	0	0	4.84146	0	0	0	0	0	5	low
954	PC-3p-230115_13		ATGCTGGCAAATGGATGGTGC	up	inf	inf	0.42265	0	1.6985	0	0	0	0	5.09551	0	0	0	0	0	5	0	low
955	PC-5p-228198_14		AGAAGTTGTGGGAATGGGTTC	up	inf	inf	0.42265	0	3.05079	0	0	0	9.15238	0	0	0	0	0	9	0	0	low
956	PC-5p-262644_11		ATTAGGGCACAGGTTAAGGAATCC	up	inf	inf	0.42265	0	1.93659	0	0	0	0	0	5.80976	0	0	0	0	0	6	low
957	PC-5p-232028_13		ATGTCAGAATCACGATGATCCACT	up	inf	inf	0.42265	0	2.25935	0	0	0	0	0	6.77805	0	0	0	0	0	7	low
960	PC-3p-216837_15		TGCCCAGAGCCCGTGAATCGTA	up	inf	inf	0.42265	0	7.74634	0	0	0	0	0	23.239	0	0	0	0	0	24	middle
961	PC-3p-357691_6		AATGATTTGATTGGTTGTGTGTGC	up	inf	inf	0.42265	0	2.0382	0	0	0	0	6.11461	0	0	0	0	0	6	0	low
962	PC-3p-310531_7		AAACTGAAACTCGCTCAAATGACA	up	inf	inf	0.42265	0	1.6985	0	0	0	0	5.09551	0	0	0	0	0	5	0	low
963	PC-5p-179278_21		CAAAGGATGTTGGCATTGATGC	up	inf	inf	0.42265	0	1.93659	0	0	0	0	0	5.80976	0	0	0	0	0	6	middle
964	PC-3p-369306_6		CACTCGATAATAGATAGAATGT	up	inf	inf	0.42265	0	1.93659	0	0	0	0	0	5.80976	0	0	0	0	0	6	low
967	PC-3p-392594_5		CTACAATGTCACCCAAATGCTGTC	up	inf	inf	0.42265	0	1.61382	0	0	0	0	0	4.84146	0	0	0	0	0	5	low
968	PC-5p-271040_10		ATTGGGTGAAACACATGTGGGTCT	up	inf	inf	0.42265	0	1.69488	0	0	0	5.08465	0	0	0	0	0	5	0	0	low
969	PC-5p-184442_20		TGTGGTTGGTGACATTGTGACATT	up	inf	inf	0.42265	0	2.03386	0	0	0	6.10158	0	0	0	0	0	6	0	0	low
970	PC-3p-301861_8		TTAATGACTCAGATTTAATGGCAC	up	inf	inf	0.42265	0	2.71182	0	0	0	8.13545	0	0	0	0	0	8	0	0	low
971	PC-5p-266921_11		TATGGAGAAAGACTTGTGTGGACC	up	inf	inf	0.42265	0	2.03386	0	0	0	6.10158	0	0	0	0	0	6	0	0	low
972	PC-3p-250384_12		AATGACACTGACAATGTGTGGCCC	up	inf	inf	0.42265	0	1.69488	0	0	0	5.08465	0	0	0	0	0	5	0	0	low
973	PC-3p-262905_11		AAGTTCGGACTCCACTTATCAGCA	up	inf	inf	0.42265	0	1.93659	0	0	0	0	0	5.80976	0	0	0	0	0	6	low
974	PC-3p-411042_5		AACGGTAGTTAGCTGTCGATGGAG	up	inf	inf	0.42265	0	1.61382	0	0	0	0	0	4.84146	0	0	0	0	0	5	low
977	PC-3p-258486_11		AAAGTTGTTTTGAACCGTCAACCC	up	inf	inf	0.42265	0	1.61382	0	0	0	0	0	4.84146	0	0	0	0	0	5	low
978	PC-5p-200280_17		ATGGGATGGAGGCTCAGACAAAGC	up	inf	inf	0.42265	0	5.76261	0	0	0	17.2878	0	0	0	0	0	17	0	0	middle
979	PC-3p-173809_22		TAAAATCTGAATCGTCTGATC	up	inf	inf	0.42265	0	2.3779	0	0	0	0	7.13371	0	0	0	0	0	7	0	low
981	PC-3p-273231_10		ACTTAACTCACGTTGGCTATAGGT	up	inf	inf	0.42265	0	5.08465	0	0	0	15.254	0	0	0	0	0	15	0	0	middle
982	PC-5p-237447_13		CAACACTCTCACTAACACTCACTC	up	inf	inf	0.42265	0	0.849252	0	0	0	0	2.54776	0	0	0	0	0	2.5	0	low
983	PC-5p-199555_17		ACTTTCCTTTCCCATGCTAAACCT	up	inf	inf	0.42265	0	1.93659	0	0	0	0	0	5.80976	0	0	0	0	0	6	low
985	PC-3p-352344_6		AAAAGTTGTCCGTTGAGTTAAGGG	up	inf	inf	0.42265	0	3.55041	0	0	0	0	0	10.6512	0	0	0	0	0	11	middle
986	PC-5p-227998_14		TGTGACAAACATGAATGCATTT	up	inf	inf	0.42265	0	2.37284	0	0	0	7.11852	0	0	0	0	0	7	0	0	low
989	PC-5p-230997_13		TTTCTTAGATTTCTGGTCCCTC	up	inf	inf	0.42265	0	1.61382	0	0	0	0	0	4.84146	0	0	0	0	0	5	low
990	PC-3p-318829_7		AAGTGTCAGCAGGAGTTAACTCGC	up	inf	inf	0.42265	0	2.25935	0	0	0	0	0	6.77805	0	0	0	0	0	7	low
992	PC-3p-222302_14		TATTGGAGGCTCATTACTT	up	inf	inf	0.42265	0	0.847442	0	0	0	2.54233	0	0	0	0	0	2.5	0	0	low
994	PC-3p-173584_22		AATATGGATTTTGACACTATC	up	inf	inf	0.42265	0	1.61382	0	0	0	0	0	4.84146	0	0	0	0	0	5	low
995	PC-5p-360987_6		GATACAAGTGAGTCGGATCAGACC	up	inf	inf	0.42265	0	1.6985	0	0	0	0	5.09551	0	0	0	0	0	5	0	low
998	PC-3p-282694_10		TGCTTATATTAGTGATTAGAGGGT	up	inf	inf	0.42265	0	1.6985	0	0	0	0	5.09551	0	0	0	0	0	5	0	low
1001	PC-3p-320743_7		ATAAATTCTATGATGGTTGACGTT	up	inf	inf	0.42265	0	2.37284	0	0	0	7.11852	0	0	0	0	0	7	0	0	low
1002	PC-3p-151796_27		TTCTATCTGTGACAGGAGGCC	up	inf	inf	0.42265	0	0.847442	0	0	0	2.54233	0	0	0	0	0	2.5	0	0	low
1003	PC-5p-281192_10		AATAACCACGTCAGCAGAATTTGC	up	inf	inf	0.42265	0	1.61382	0	0	0	0	0	4.84146	0	0	0	0	0	5	low
1006	PC-5p-209473_16		CTAAGGACACATGTTAAAGAATCC	up	inf	inf	0.42265	0	1.01693	0	0	0	3.05079	0	0	0	0	0	3	0	0	low
1007	PC-3p-272046_10		ATTAAGTCCCTCGCCCATGGAGCC	up	inf	inf	0.42265	0	1.61382	0	0	0	0	0	4.84146	0	0	0	0	0	5	low
1008	PC-3p-222019_14		AAAGTGCTTAACCAGTGCCCCGAG	up	inf	inf	0.42265	0	1.29106	0	0	0	0	0	3.87317	0	0	0	0	0	4	low
1009	PC-3p-197147_18		ATATCCTGCGTGCTCTTACCTATC	up	inf	inf	0.42265	0	2.25935	0	0	0	0	0	6.77805	0	0	0	0	0	7	low
1011	PC-5p-253389_11		ACAAGTCAATGCTGACGTAGCGCC	up	inf	inf	0.42265	0	1.61382	0	0	0	0	0	4.84146	0	0	0	0	0	5	low
1015	PC-5p-237794_13		AACTGTCGTTGGACACTTTTAAGA	up	inf	inf	0.42265	0	2.71761	0	0	0	0	8.15282	0	0	0	0	0	8	0	low
1018	PC-5p-231377_13		ATTGATAACCGTTGAATTCAGACC	up	inf	inf	0.42265	0	3.55041	0	0	0	0	0	10.6512	0	0	0	0	0	11	middle
1020	PC-5p-270115_10		TTCATCTTTAGGTAGTGGGCAA	up	inf	inf	0.42265	0	6.45528	0	0	0	0	0	19.3659	0	0	0	0	0	20	middle
1021	PC-5p-374689_6		TTTGCCATCCTTCGTCTTTGT	up	inf	inf	0.42265	0	1.93659	0	0	0	0	0	5.80976	0	0	0	0	0	6	low
743	mtr-MIR160c-p3		TTGGCATGAAGGGAGCCATGC	down	-inf	-inf	0.42265	1.90231	0	0	0	5.70692	0	0	0	0	0	5	0	0	0	low
744	mtr-miR169j		TGAGCCAGGATGACTTGCCGG	down	-inf	-inf	0.42265	3.42415	0	0	0	10.2725	0	0	0	0	0	9	0	0	0	middle
745	mtr-miR169f_R+2		AAGCCAAGGATGACTTGCCTAGC	down	-inf	-inf	0.42265	3.80461	0	0	0	11.4138	0	0	0	0	0	10	0	0	0	middle
747	mtr-MIR398b-p5_1ss5CT		GGGTTGACATGAGACCACATG	down	-inf	-inf	0.42265	1.95459	0	5.86378	0	0	0	0	0	5	0	0	0	0	0	low
756	mtr-MIR2611-p3_2ss9GA18TC		ATGGATCCAATCAAGTACATCTTT	down	-inf	-inf	0.42265	1.87733	0	0	5.632	0	0	0	0	0	6	0	0	0	0	low
758	mtr-MIR2642-p5_1ss16TC		TGATTGGTTAAAATTCACATG	down	-inf	-inf	0.42265	2.19022	0	0	6.57067	0	0	0	0	0	7	0	0	0	0	low
759	mtr-MIR2655b-p3_1ss1GA		ATTTGGTCCCTTAACTTATTT	down	-inf	-inf	0.42265	0.488649	0	1.46595	0	0	0	0	0	1.25	0	0	0	0	0	low
760	mtr-MIR2671j-p3_1ss19AT		AAGTTTCGTTTCGGTCCCTTAACT	down	-inf	-inf	0.42265	0.469334	0	0	1.408	0	0	0	0	0	1.5	0	0	0	0	low
761	mtr-MIR2673b-p3_1ss13TC		GAACGAGGAGTACTGTGATTGGTC	down	-inf	-inf	0.42265	1.56445	0	0	4.69334	0	0	0	0	0	5	0	0	0	0	low
762	mtr-miR4414a-5p		AGCTGCTGACTCGTTGGTTCA	down	-inf	-inf	0.42265	1.56445	0	0	4.69334	0	0	0	0	0	5	0	0	0	0	low
764	mtr-MIR5273-p5_2ss1TA23AC		AAAACCTTCAAAGATTATTAGACC	down	-inf	-inf	0.42265	1.56445	0	0	4.69334	0	0	0	0	0	5	0	0	0	0	low
765	mtr-MIR5285a-p3_1ss14AT		ATTCTTGTAACCCTTTGATATCTC	down	-inf	-inf	0.42265	2.19022	0	0	6.57067	0	0	0	0	0	7	0	0	0	0	low
770	mtr-miR156j_R+2_1ss12GA_1		TGACAGAAGAGAGTGAGCACAA	down	-inf	-inf	0.42265	1.95459	0	5.86378	0	0	0	0	0	5	0	0	0	0	0	low
771	tcc-miR172d		AGAATCCTGATGATGCTGCAT	down	-inf	-inf	0.42265	1.17276	0	3.51827	0	0	0	0	0	3	0	0	0	0	0	low
772	ptc-miR396g-5p		TTCCACGGCTTTCTTGAACTT	down	-inf	-inf	0.42265	0.951153	0	0	0	2.85346	0	0	0	0	0	2.5	0	0	0	low
783	mtr-MIR5563-p5		CAACTCGGTCCTTCTGTTAAC	down	-inf	-inf	0.42265	1.09511	0	0	3.28534	0	0	0	0	0	3.5	0	0	0	0	low
785	mtr-miR156j_R+2_1ss12GA_2		TGACAGAAGAGAGTGAGCACCA	down	-inf	-inf	0.42265	1.95459	0	5.86378	0	0	0	0	0	5	0	0	0	0	0	low
794	mtr-miR1510b-5p_L-2R+3		ATGGATCCCTACCATGTGGACT	down	-inf	-inf	0.42265	1.14138	0	0	0	3.42415	0	0	0	0	0	3	0	0	0	low
796	mtr-MIR2585b-p3_2ss19AG22GA		TTGTCAGGATTAGCGATTGCAAGG	down	-inf	-inf	0.42265	4.30011	0	12.9003	0	0	0	0	0	11	0	0	0	0	0	middle
801	mtr-MIR2609b-p3_2ss9GA21TC		TTGGCTTTAGAAGTAATAGGC	down	-inf	-inf	0.42265	1.90231	0	0	0	5.70692	0	0	0	0	0	5	0	0	0	low
802	mtr-MIR2609a-p3_2ss5GA17TC		CTTTAGAAGTAATAGGCTCTC	down	-inf	-inf	0.42265	3.04369	0	0	0	9.13107	0	0	0	0	0	8	0	0	0	low
803	mtr-MIR2609b-p3_2ss5GA17TC		CTTTAGAAGTAATAGGCTCTC	down	-inf	-inf	0.42265	3.04369	0	0	0	9.13107	0	0	0	0	0	8	0	0	0	low
804	mtr-MIR2620-p5_2ss5TC17GA_1		AGTTCGAAAGTATTGTAGGGA	down	-inf	-inf	0.42265	0.782223	0	0	2.34667	0	0	0	0	0	2.5	0	0	0	0	low
805	mtr-MIR2646a-p5_1ss17AT		ATTACACACGTGGCACTCATTAAT	down	-inf	-inf	0.42265	1.90231	0	0	0	5.70692	0	0	0	0	0	5	0	0	0	low
806	mtr-MIR2646a-p3_2ss12AT24AT		ACACGTGGCACTCATTAATTGATT	down	-inf	-inf	0.42265	1.25156	0	0	3.75467	0	0	0	0	0	4	0	0	0	0	low
808	mtr-MIR5251-p3_2ss12CG20TG		GTTGGTGTCTTGTTGAACTGG	down	-inf	-inf	0.42265	1.17276	0	3.51827	0	0	0	0	0	3	0	0	0	0	0	low
816	mtr-miR5287a_L+1R-1_1ss10TA		TTGCTTATAATAGTGACCGGAGGA	down	-inf	-inf	0.42265	0.938667	0	0	2.816	0	0	0	0	0	3	0	0	0	0	low
817	mtr-miR5741a_L+1R-1		TTAGGGACTAAATTGATGGTT	down	-inf	-inf	0.42265	1.95459	0	5.86378	0	0	0	0	0	5	0	0	0	0	0	low
818	cca-miR6113_R-1_1ss21TC		TCTGAAACTCAAGAACACGTC	down	-inf	-inf	0.42265	1.90231	0	0	0	5.70692	0	0	0	0	0	5	0	0	0	low
821	PC-5p-266346_11		CATCCCGATCGCAAGCACAATTTG	down	-inf	-inf	0.42265	0.951153	0	0	0	2.85346	0	0	0	0	0	2.5	0	0	0	low
823	PC-3p-471300_5		TCAATATTGGCACATGTGAAAAAT	down	-inf	-inf	0.42265	1.56445	0	0	4.69334	0	0	0	0	0	5	0	0	0	0	low
826	PC-3p-360002_6		TGTGAGGTTTCTACGGCTATG	down	-inf	-inf	0.42265	1.17276	0	3.51827	0	0	0	0	0	3	0	0	0	0	0	low
827	PC-3p-299060_8		CATTATAAATGATTGACGATA	down	-inf	-inf	0.42265	1.52185	0	0	0	4.56554	0	0	0	0	0	4	0	0	0	low
828	PC-3p-220594_15		GTGTCATTTAGGATTGGAAGGTCC	down	-inf	-inf	0.42265	1.75913	0	5.2774	0	0	0	0	0	4.5	0	0	0	0	0	low
830	PC-5p-437391_5		AACAAGTATCCTTAGGGCACTCTT	down	-inf	-inf	0.42265	0.782223	0	0	2.34667	0	0	0	0	0	2.5	0	0	0	0	low
833	PC-5p-481853_5		CTCCAAAATTTTTCATCCATGAAA	down	-inf	-inf	0.42265	0.951153	0	0	0	2.85346	0	0	0	0	0	2.5	0	0	0	low
834	PC-3p-225634_14		TCAGAGCCAGAAGCTTTTCAGA	down	-inf	-inf	0.42265	0.977297	0	2.93189	0	0	0	0	0	2.5	0	0	0	0	0	low
836	PC-3p-235633_13		TTTGCTCTTTTCACTCTCATA	down	-inf	-inf	0.42265	4.30011	0	12.9003	0	0	0	0	0	11	0	0	0	0	0	middle
837	PC-5p-300282_8		TAACTGCTGCGGAAAAATGAA	down	-inf	-inf	0.42265	1.90231	0	0	0	5.70692	0	0	0	0	0	5	0	0	0	low
851	PC-5p-228099_14		ATGTACGGCCTAATTTGAAGT	down	-inf	-inf	0.42265	1.14138	0	0	0	3.42415	0	0	0	0	0	3	0	0	0	low
855	PC-3p-247383_12		TGAATGGATTTTGACATTATC	down	-inf	-inf	0.42265	1.09511	0	0	3.28534	0	0	0	0	0	3.5	0	0	0	0	low
856	PC-3p-342316_6		TCATAGAAAGATGTGCGACGACT	down	-inf	-inf	0.42265	1.17276	0	3.51827	0	0	0	0	0	3	0	0	0	0	0	low
864	PC-3p-110266_43		ATAATTGTTGATATAATCATTGCT	down	-inf	-inf	0.42265	0.951153	0	0	0	2.85346	0	0	0	0	0	2.5	0	0	0	middle
867	PC-3p-241987_12		AAGAGAGTGTTAGAAAAAGAATGT	down	-inf	-inf	0.42265	1.09511	0	0	3.28534	0	0	0	0	0	3.5	0	0	0	0	low
872	PC-3p-159587_25		TCGGAGGACTTATTTGTCATT	down	-inf	-inf	0.42265	0.938667	0	0	2.816	0	0	0	0	0	3	0	0	0	0	low
873	PC-5p-137560_31		GTATTGCTTTTCTGATTTGGA	down	-inf	-inf	0.42265	1.71208	0	0	0	5.13623	0	0	0	0	0	4.5	0	0	0	low
874	PC-3p-254106_11		ACAAAATGACACGTGTCCCTCATT	down	-inf	-inf	0.42265	2.09254	0	0	0	6.27761	0	0	0	0	0	5.5	0	0	0	low
877	PC-3p-335422_6		ATGCTTTGTCAGAACTACCACTCC	down	-inf	-inf	0.42265	1.87733	0	0	5.632	0	0	0	0	0	6	0	0	0	0	low
878	PC-5p-356510_6		CCAAATCATCTGTAGTCAAGAC	down	-inf	-inf	0.42265	0.938667	0	0	2.816	0	0	0	0	0	3	0	0	0	0	low
880	PC-5p-218472_15		AAGTAAAAATGAGTCAACATAAGT	down	-inf	-inf	0.42265	0.951153	0	0	0	2.85346	0	0	0	0	0	2.5	0	0	0	low
883	PC-3p-229283_13		AGTTCCTTAACTAGTGCCCCGGGG	down	-inf	-inf	0.42265	1.36822	0	4.10465	0	0	0	0	0	3.5	0	0	0	0	0	low
885	PC-3p-167646_23		TCATTTTTCCCCGGCAGTTAA	down	-inf	-inf	0.42265	0.977297	0	2.93189	0	0	0	0	0	2.5	0	0	0	0	0	low
886	PC-3p-214350_15		ATAAGAGAATGAGTGTTGAAGAGA	down	-inf	-inf	0.42265	1.14138	0	0	0	3.42415	0	0	0	0	0	3	0	0	0	low
889	PC-5p-190994_19		TACGTGACAATATATGGAATAGCC	down	-inf	-inf	0.42265	1.71208	0	0	0	5.13623	0	0	0	0	0	4.5	0	0	0	low
900	PC-5p-365020_6		ATTGGTGACCGTTCAATCAAGATC	down	-inf	-inf	0.42265	0.782223	0	0	2.34667	0	0	0	0	0	2.5	0	0	0	0	low
901	PC-3p-233833_13		CAACGGACTTAAAAAATGAAAAGT	down	-inf	-inf	0.42265	1.25156	0	0	3.75467	0	0	0	0	0	4	0	0	0	0	low
902	PC-3p-256322_11		AATGAATCACGGTCTTAACAAGCA	down	-inf	-inf	0.42265	2.09254	0	0	0	6.27761	0	0	0	0	0	5.5	0	0	0	low
903	PC-5p-232805_13		TTGAGTAACTGATGTATCTGG	down	-inf	-inf	0.42265	2.473	0	0	0	7.419	0	0	0	0	0	6.5	0	0	0	low
905	PC-5p-242872_12		CATCTGCCTATGATCTTTCTT	down	-inf	-inf	0.42265	0.782223	0	0	2.34667	0	0	0	0	0	2.5	0	0	0	0	low
906	PC-5p-229124_14		TGGGGATTGGGATTCAGTGAC	down	-inf	-inf	0.42265	1.36822	0	4.10465	0	0	0	0	0	3.5	0	0	0	0	0	low
915	PC-5p-143913_29		TGTTGAATATGAGTAACTCGC	down	-inf	-inf	0.42265	1.408	0	0	4.224	0	0	0	0	0	4.5	0	0	0	0	low
919	PC-5p-177634_21		CATGTTTGGATTGATTGTGAG	down	-inf	-inf	0.42265	0.977297	0	2.93189	0	0	0	0	0	2.5	0	0	0	0	0	low
921	PC-5p-239990_12		AAATTCTGGGCAACTCGCATC	down	-inf	-inf	0.42265	2.73643	0	8.2093	0	0	0	0	0	7	0	0	0	0	0	low
922	PC-5p-237345_13		TCATGGAATAACTGATGTACC	down	-inf	-inf	0.42265	1.09511	0	0	3.28534	0	0	0	0	0	3.5	0	0	0	0	low
923	PC-3p-183970_20		AATCTTGTCTCCAGTTGAGTTGTA	down	-inf	-inf	0.42265	3.12735	0	9.38205	0	0	0	0	0	8	0	0	0	0	0	middle
924	PC-5p-264124_11		AAGTAAGGACCCCCCCATTGGAGA	down	-inf	-inf	0.42265	1.87733	0	0	5.632	0	0	0	0	0	6	0	0	0	0	low
925	PC-5p-229406_13		TAATAGAATTCCAACATATGT	down	-inf	-inf	0.42265	2.73643	0	8.2093	0	0	0	0	0	7	0	0	0	0	0	low
926	PC-3p-162925_24		TTTTCAAGATCCCACATTGGC	down	-inf	-inf	0.42265	2.50311	0	0	7.50934	0	0	0	0	0	8	0	0	0	0	low
927	PC-5p-246686_12		AAAAACAAGGGAAAATGAATT	down	-inf	-inf	0.42265	1.36822	0	4.10465	0	0	0	0	0	3.5	0	0	0	0	0	low
933	PC-5p-291372_9		CTAAGGGCACATGTTAAAGAACCT	down	-inf	-inf	0.42265	4.69334	0	0	14.08	0	0	0	0	0	15	0	0	0	0	middle
934	PC-3p-202814_17		ATATGAGGGCATATCAAGTGAGAG	down	-inf	-inf	0.42265	1.87733	0	0	5.632	0	0	0	0	0	6	0	0	0	0	low
936	PC-3p-216919_15		CAACCTAGACAAAGATACATGA	down	-inf	-inf	0.42265	1.56445	0	0	4.69334	0	0	0	0	0	5	0	0	0	0	low
937	PC-5p-362340_6		AGAGTTAACTTCCGCTGACACTTT	down	-inf	-inf	0.42265	2.34551	0	7.03654	0	0	0	0	0	6	0	0	0	0	0	low
939	PC-3p-328967_7		CAATGTCACAATGTCACCAACCAC	down	-inf	-inf	0.42265	2.19022	0	0	6.57067	0	0	0	0	0	7	0	0	0	0	low
941	PC-5p-213719_15		CTAAGGACACATGTTAAGGAAGTC	down	-inf	-inf	0.42265	3.04369	0	0	0	9.13107	0	0	0	0	0	8	0	0	0	low
943	PC-5p-283644_10		AGTAAAAATGGGTCAACATAAGTT	down	-inf	-inf	0.42265	1.56445	0	0	4.69334	0	0	0	0	0	5	0	0	0	0	low
945	PC-5p-247593_12		AAAGACACGTAGCGTAACTTAAGT	down	-inf	-inf	0.42265	1.87733	0	0	5.632	0	0	0	0	0	6	0	0	0	0	low
947	PC-5p-257131_11		TGTCACAGGAGGGATGACATTG	down	-inf	-inf	0.42265	3.44178	0	0	10.3253	0	0	0	0	0	11	0	0	0	0	middle
949	PC-3p-217072_15		ATGGTGCTTACATATATGGACGGA	down	-inf	-inf	0.42265	2.816	0	0	8.448	0	0	0	0	0	9	0	0	0	0	low
950	PC-3p-241560_12		CGATAATAGATAGAATGTTGA	down	-inf	-inf	0.42265	0.938667	0	0	2.816	0	0	0	0	0	3	0	0	0	0	low
951	PC-5p-227840_14		ATAGACTGATGGTGTAAAACAACT	down	-inf	-inf	0.42265	5.32646	0	0	0	15.9794	0	0	0	0	0	14	0	0	0	middle
953	PC-3p-380115_6		TACCAGTGTTTAGGCTCTTAG	down	-inf	-inf	0.42265	2.28277	0	0	0	6.84831	0	0	0	0	0	6	0	0	0	low
958	PC-3p-224832_14		AGGTTGTGCTCCAATAGTTGGATA	down	-inf	-inf	0.42265	3.51827	0	10.5548	0	0	0	0	0	9	0	0	0	0	0	middle
959	PC-5p-258844_11		AACTGACTTAAGTAACGTAGCGCA	down	-inf	-inf	0.42265	2.34551	0	7.03654	0	0	0	0	0	6	0	0	0	0	0	low
965	PC-5p-275208_10		TTTGCCTCCCGGGAGAATCGAACC	down	-inf	-inf	0.42265	5.86378	0	17.5913	0	0	0	0	0	15	0	0	0	0	0	middle
966	PC-5p-274994_10		ATAGACTGACGGTGTAAAACAACT	down	-inf	-inf	0.42265	3.90919	0	11.7276	0	0	0	0	0	10	0	0	0	0	0	middle
975	PC-5p-418204_5		TTGTCTTTTACTGGTGTAGTGTCC	down	-inf	-inf	0.42265	1.56445	0	0	4.69334	0	0	0	0	0	5	0	0	0	0	low
976	PC-5p-279832_10		CAGATGATTGTAAGTACTAAAAAC	down	-inf	-inf	0.42265	3.80461	0	0	0	11.4138	0	0	0	0	0	10	0	0	0	middle
980	PC-5p-269276_10		AATTTTGATTCTTGGAGTAGGAAT	down	-inf	-inf	0.42265	1.90231	0	0	0	5.70692	0	0	0	0	0	5	0	0	0	low
984	PC-5p-381293_6		AGATCTAATTGAGAAACTTTTGAC	down	-inf	-inf	0.42265	1.87733	0	0	5.632	0	0	0	0	0	6	0	0	0	0	low
987	PC-5p-198786_18		ATTATACCCCACAACTCCAAGTTG	down	-inf	-inf	0.42265	2.19022	0	0	6.57067	0	0	0	0	0	7	0	0	0	0	low
988	PC-3p-199082_18		TTAAACCAAAGATAGCTCATG	down	-inf	-inf	0.42265	3.12889	0	0	9.38667	0	0	0	0	0	10	0	0	0	0	low
991	PC-5p-242600_12		TGGTTCTCACCGGATATGCTCCCT	down	-inf	-inf	0.42265	1.90231	0	0	0	5.70692	0	0	0	0	0	5	0	0	0	low
993	PC-3p-199925_17		TTGACTGATGTTGACTCGAGG	down	-inf	-inf	0.42265	0.951153	0	0	0	2.85346	0	0	0	0	0	2.5	0	0	0	low
996	PC-3p-222543_14		AATAGCGTCTACCTGACTGAAGCT	down	-inf	-inf	0.42265	3.51827	0	10.5548	0	0	0	0	0	9	0	0	0	0	0	middle
997	PC-3p-241816_12		TGGACGTGAGCAAAATATGTT	down	-inf	-inf	0.42265	1.87733	0	0	5.632	0	0	0	0	0	6	0	0	0	0	low
999	PC-5p-306358_7		CAATTGAACAGTGCTTGGACACAC	down	-inf	-inf	0.42265	2.65956	0	0	7.97867	0	0	0	0	0	8.5	0	0	0	0	low
1000	PC-5p-138755_31		TGTGGATATTTTGTTTGATCTC	down	-inf	-inf	0.42265	1.56445	0	0	4.69334	0	0	0	0	0	5	0	0	0	0	middle
1004	PC-5p-311235_7		AATGCATATCTCTGCCAACTAAGC	down	-inf	-inf	0.42265	2.19022	0	0	6.57067	0	0	0	0	0	7	0	0	0	0	low
1005	PC-5p-298819_8		ATAGTCATTGTCTTTGTCAAAAGT	down	-inf	-inf	0.42265	2.50311	0	0	7.50934	0	0	0	0	0	8	0	0	0	0	low
1010	PC-3p-282325_10		TGTGTGTATATTTAATGATGAT	down	-inf	-inf	0.42265	4.69334	0	0	14.08	0	0	0	0	0	15	0	0	0	0	middle
1012	PC-3p-220863_15		ACGTCACGTGGAGCTATTTACATC	down	-inf	-inf	0.42265	1.33161	0	0	0	3.99484	0	0	0	0	0	3.5	0	0	0	low
1013	PC-5p-201568_17		AATCAGCATCCCGAGGAGTAGATA	down	-inf	-inf	0.42265	3.12889	0	0	9.38667	0	0	0	0	0	10	0	0	0	0	low
1014	PC-5p-282507_10		AATAGGCACCCTCTTTGTGACACC	down	-inf	-inf	0.42265	3.90919	0	11.7276	0	0	0	0	0	10	0	0	0	0	0	middle
1016	PC-5p-285236_9		TACAGGTTAAACTTTGCTCTGCAG	down	-inf	-inf	0.42265	2.816	0	0	8.448	0	0	0	0	0	9	0	0	0	0	low
1017	PC-5p-124037_36		TCGGGTTGGTGACCTGCTTCAC	down	-inf	-inf	0.42265	2.66323	0	0	0	7.98969	0	0	0	0	0	7	0	0	0	middle
1019	PC-5p-379263_6		CGAGAAAAGAGGAAATGACT	down	-inf	-inf	0.42265	2.28277	0	0	0	6.84831	0	0	0	0	0	6	0	0	0	low
1022	PC-3p-106274_45		TTTGTCAAACCAGCACCGATC	up	2.45902	1.29809	0.423715	1.17276	2.88384	3.51827	0	0	5.08465	3.56686	0	3	0	0	5	3.5	0	low
1023	mtr-MIR2603-p3_1ss16AG		TTTTTACAAAGTGCAGGGACC	down	0.868826	-0.202862	0.424592	1062.19	922.86	1252.5	1144.24	789.838	977.27	892.733	898.576	1068	1219	692	961	876	928	high
1024	gma-miR166a-5p_1ss21GA		GGAATGTTGTCTGGCTCGAGA	up	1.33331	0.415017	0.425481	46.982	62.6417	45.1511	34.7307	61.0641	38.6434	90.7001	58.5817	38.5	37	53.5	38	89	60.5	middle
1025	gma-miR394a-5p_L+1		TTTGGCATTCTGTCCACCTCC	up	1.17774	0.236019	0.425842	964.95	1136.46	1077.18	885.163	932.511	941.678	990.567	1477.13	918.5	943	817	926	972	1525.5	high
1026	ptc-miR6478_R+3_1ss21GA		CCGACCTTAGCTCAGTTGGTAGAG	up	2.38191	1.25212	0.426074	1.25156	2.98109	0	3.75467	0	0	4.58596	4.35732	0	4	0	0	4.5	4.5	low
1027	gma-miR159a-3p_1ss21AT		TTTGGATTGAAGGGAGCTCTT	down	0.8754	-0.191986	0.427922	243.502	213.161	254.488	224.341	251.675	170.336	272.1	197.048	217	239	220.5	167.5	267	203.5	middle
1028	mtr-MIR169l-p5		AGAGTGTAGTACAGCCAAGGA	up	1.35469	0.437965	0.429027	14.1216	19.1305	8.2093	13.6107	20.5449	17.2878	27.5158	12.5878	7	14.5	18	17	27	13	middle
1029	PC-3p-109670_43		TTATTGGTGTGATGATTCCTC	down	0.406912	-1.29721	0.430408	2.49914	1.01693	2.93189	0	4.56554	3.05079	0	0	2.5	0	4	3	0	0	low
1030	PC-5p-10968_429		TTTTATTGAGGATCAACTGGAAA	down	0.571457	-0.807282	0.433024	58.1557	33.2335	85.0248	40.3627	49.0795	80.3375	19.3629	0	72.5	43	43	79	19	0	middle
1031	PC-5p-56299_91		AGACTGATTTAGATGATGGTA	down	0.603666	-0.728177	0.434897	5.34293	3.22535	7.03654	3.28534	5.70692	2.54233	7.13371	0	6	3.5	5	2.5	7	0	low
1032	mtr-miR2603_R-1_1ss6TC		TTTGGCATTGGTCCCTGCACT	down	0.82925	-0.270122	0.435967	1165.48	966.474	1549.21	1099.18	848.048	1053.54	957.956	887.924	1321	1171	743	1036	940	917	high
1033	PC-3p-9917_469		TTGTAACCCTTATCCACCACC	down	0.658459	-0.602835	0.436182	101.926	67.1139	66.2607	77.44	162.077	87.9645	98.8529	14.5244	56.5	82.5	142	86.5	97	15	middle
1034	mtr-miR398a-5p_L-1R+1_1ss22GC		GAGTGACACTGAGAACACAACA	up	8.07793	3.01399	0.439056	12.478	100.797	34.0099	0	3.42415	2.54233	284.839	15.0085	29	0	3	2.5	279.5	15.5	middle
1035	PC-3p-177852_21		AATCACGGTGGATCGTCATGATTC	up	2.32125	1.2149	0.439768	1.56445	3.63147	0	4.69334	0	5.08465	0	5.80976	0	5	0	5	0	6	low
1036	PC-5p-4018_1009		TTCGTCGTCGTGATGATAGCATG	up	21.1348	4.40155	0.441299	19.2626	407.111	10.5548	24.4053	22.8277	1221.33	0	0	9	26	20	1201	0	0	high
1037	mtr-miR399c		TGCCAAAGGAGATTTGCCCTG	up	2.02207	1.01583	0.441783	3.24555	6.56271	4.10465	5.632	0	3.05079	13.2483	3.38902	3.5	6	0	3	13	3.5	middle
1038	mtr-MIR2663-p3_2ss5TG19AG		ATAAGCAAATAATTAGAGGGG	up	2.48817	1.31509	0.442991	0.938667	2.33556	0	2.816	0	0	4.58596	2.42073	0	3	0	0	4.5	2.5	low
1039	mtr-MIR2663-p5_2ss5TG19AG		ATAAGCAAATAATTAGAGGGG	up	2.48817	1.31509	0.442991	0.938667	2.33556	0	2.816	0	0	4.58596	2.42073	0	3	0	0	4.5	2.5	low
1040	gma-miR166a-5p_R+1_1ss5TC		GGAACGTTGTCTGGCTCGAGGT	up	2.41799	1.27381	0.445274	0.951153	2.29988	0	0	2.85346	2.54233	0	4.35732	0	0	2.5	2.5	0	4.5	low
1041	PC-5p-182591_20		ACATTTTAGATTGTTGAGGAA	down	0.426333	-1.22995	0.445383	2.3853	1.01693	2.93189	4.224	0	3.05079	0	0	2.5	4.5	0	3	0	0	low
1042	PC-5p-11696_404		GTGTAATGAAAGAGCTGAAAAGGA	down	0.70407	-0.506209	0.447763	33.0541	23.2724	26.387	27.6907	45.0847	9.15238	41.7832	18.8817	22.5	29.5	39.5	9	41	19.5	middle
1043	mtr-miR1510a-5p_R+2		TTGTCTTACCCATTCCTCCCATA	down	0.515592	-0.955698	0.447804	3.44304	1.7752	3.51827	2.816	3.99484	0	0	5.32561	3	3	3.5	0	0	5.5	low
1044	mtr-MIR5241c-p5		TTGGGCTCATTTTTGTTTGGT	down	0.439442	-1.18626	0.447932	3.8569	1.69488	5.86378	0	5.70692	5.08465	0	0	5	0	5	5	0	0	low
1045	PC-3p-157852_26		TAGGACCAGGCTTCGTTCCCC	up	2.27853	1.1881	0.44803	1.56368	3.56288	4.69103	0	0	5.59312	5.09551	0	4	0	0	5.5	5	0	middle
1046	PC-3p-84049_59		ATCAACTTTGGCTTAACGGACAGA	up	1.59422	0.672855	0.448042	6.90059	11.0011	5.86378	0	14.838	8.13545	13.2483	11.6195	5	0	13	8	13	12	middle
1047	PC-3p-216185_15		AATAGAGTAGATTCCTTGTACCCA	down	0.44038	-1.18318	0.449001	3.8569	1.6985	5.86378	0	5.70692	0	5.09551	0	5	0	5	0	5	0	low
1048	mtr-miR5213-5p		TACGTGTGTCTTCACCTCTGAA	up	1.37138	0.455628	0.451165	1003.93	1376.77	856.112	1201.49	954.197	1989.12	627.767	1513.44	730	1280	836	1956	616	1563	high
1049	PC-3p-159452_25		GAATAGAGTAGATTCCTTGTACCC	up	2.3504	1.23291	0.452098	0.938667	2.20625	0	2.816	0	2.54233	4.07641	0	0	3	0	2.5	4	0	low
1050	PC-3p-42173_122		CGTGACAACACATATTTGGATGCA	down	0.674159	-0.56884	0.452319	9.3948	6.33359	5.2774	15.488	7.419	3.05079	9.17192	6.77805	4.5	16.5	6.5	3	9	7	middle
1051	gma-miR319c_L-1R+2		TGGACTGAAGGGAGCTCCTTC	up	1.69337	0.759893	0.452856	13.1223	22.2208	9.96843	6.57067	22.8277	8.64391	17.8343	40.1841	8.5	7	20	8.5	17.5	41.5	middle
1052	lja-miR1511-3p_R-1_1ss23GT		AACCAGGCTCTGATACCATGAAT	down	0.661723	-0.5957	0.453564	21.9901	14.5514	8.2093	33.792	23.9691	7.62698	23.4393	12.5878	7	36	21	7.5	23	13	middle
1053	mtr-MIR2592bl-p5_1ss22TG		TTCAAAGGTAAGATAATTGTTG	up	2.13146	1.09185	0.454541	2.24199	4.77872	2.34551	4.38045	0	0	9.17192	5.16423	2	4.66667	0	0	9	5.33333	low
1054	PC-3p-149644_28		TTGTACTCTATGGCACTTTAC	down	0.433479	-1.20597	0.455758	1.95498	0.847442	3.51827	2.34667	0	2.54233	0	0	3	2.5	0	2.5	0	0	low
1055	mtr-MIR5287b-p5_2ss20GC24AT		CTCCGGTCACTATTATAAGCAAAT	down	0.811428	-0.301465	0.455976	192.076	155.856	119.621	253.44	203.166	174.912	159.999	132.656	102	270	178	172	157	137	middle
1056	PC-5p-14948_323		TTTTATTGAGGATCAACTGGAA	down	0.583276	-0.777748	0.456064	40.6967	23.7374	58.0514	33.792	30.2467	58.4735	12.7388	0	49.5	36	26.5	57.5	12.5	0	middle
1057	PC-5p-37174_138		GGGTGACAGATAGAGAGTAAGC	down	0.392989	-1.34744	0.457139	16.8513	6.62235	5.2774	7.04	38.2364	2.54233	17.3247	0	4.5	7.5	33.5	2.5	17	0	middle
1058	PC-3p-198574_18		AAGTTTGGACTCCACTCATCAGCA	up	2.31955	1.21384	0.458102	0.951153	2.20625	0	0	2.85346	2.54233	4.07641	0	0	0	2.5	2.5	4	0	low
1059	mtr-MIR5290-p5_1ss21AC		AAGATCCTCTCCATTTATAACTTT	down	0.448425	-1.15706	0.458154	3.77964	1.69488	0	5.632	5.70692	5.08465	0	0	0	6	5	5	0	0	low
1060	lja-miR172a_R+1		AGAATCTTGATGATGCTGCAGT	up	1.2474	0.318922	0.461921	112.857	140.778	116.103	122.027	100.442	202.369	110.063	109.901	99	130	88	199	108	113.5	middle
1061	PC-5p-66678_76		AATAAGCACCTCCTTTGTGACACC	up	2.83109	1.50136	0.462515	4.60814	13.0461	0	4.69334	9.13107	0	8.15282	30.9854	0	5	8	0	8	32	middle
1062	gma-miR1509a_2ss18GA22GA		TTAATCAAGGAAATCACAGTCA	down	0.441489	-1.17955	0.46272	1.92361	0.849252	0	2.34667	3.42415	0	2.54776	0	0	2.5	3	0	2.5	0	low
1063	PC-5p-76864_66		AAAGCATGTGGGTACAAGGAATCT	up	1.65501	0.72684	0.464057	3.66706	6.06901	3.51827	2.34667	5.13623	4.57619	11.2101	2.42073	3	2.5	4.5	4.5	11	2.5	middle
1064	mtr-miR5272a		GAATTGATTTATGTTTGGATACAC	up	1.39502	0.480284	0.464906	5.87279	8.19266	1.17276	9.99681	6.44882	6.71174	8.76428	9.10195	1	10.65	5.65	6.6	8.6	9.4	low
1065	mtr-MIR390-p3		CGCTATCCATCCTGAGTTTCA	down	0.795297	-0.330435	0.465264	32.5875	25.9168	39.8737	38.4854	19.4035	29.491	16.3056	31.9537	34	41	17	29	16	33	middle
1066	mtr-MIR5284g-p5_1ss7CT		AGATTCTTCCACTTTTGGTCCCTC	up	2.02099	1.01506	0.46683	8.60368	17.3879	4.69103	21.12	0	9.15238	8.15282	34.8585	4	22.5	0	9	8	36	middle
1067	mtr-MIR5284e-p5_1ss7CT		AGATTCTTCCACTTTTGGTCCCTC	up	2.02099	1.01506	0.46683	8.60368	17.3879	4.69103	21.12	0	9.15238	8.15282	34.8585	4	22.5	0	9	8	36	middle
1068	PC-5p-72727_70		TTTGACAGTTTTGGCCCCAAG	down	0.739588	-0.435206	0.467488	7.04572	5.21093	8.79567	8.91734	3.42415	5.08465	7.64327	2.90488	7.5	9.5	3	5	7.5	3	low
1069	PC-5p-69317_73		CAAATGATTCATCAATAGGTG	down	0.656917	-0.606218	0.46796	4.39216	2.88528	4.69103	5.632	2.85346	3.05079	5.60506	0	4	6	2.5	3	5.5	0	low
1070	mtr-MIR172a-p5		GGAGCATCATCAGGATTCACA	down	0.612264	-0.707773	0.468853	49.0552	30.0348	53.9468	28.16	65.0589	21.3555	0	68.7488	46	30	57	21	0	71	middle
1071	PC-5p-39450_130		TTGCCTTCGTTTTCTTGTCTC	down	0.607375	-0.71934	0.469145	17.1079	10.3909	31.6644	9.38667	10.2725	6.10158	17.3247	7.74634	27	10	9	6	17	8	middle
1072	PC-3p-29826_170		GGGATAATGCAAATGATAGGAACC	down	0.387345	-1.36831	0.469999	16.1899	6.27107	12.9003	35.6694	0	18.8132	0	0	11	38	0	18.5	0	0	middle
1073	PC-5p-135771_32		AACGTCATGACCGGGGTTCGAACC	up	2.27693	1.18709	0.470536	1.90231	4.33143	0	0	5.70692	0	8.15282	4.84146	0	0	5	0	8	5	low
1074	gma-MIR1509b-p5_2ss8AG18GA		TTAATCAGGGAAATCACAGTT	down	0.808928	-0.305917	0.470593	715.765	579.002	531.845	714.326	901.123	628.972	326.622	781.412	453.5	761	789.5	618.5	320.5	807	middle
1075	gma-miR1509b_2ss8AG18GA		TTAATCAGGGAAATCACAGTT	down	0.808928	-0.305917	0.470593	715.765	579.002	531.845	714.326	901.123	628.972	326.622	781.412	453.5	761	789.5	618.5	320.5	807	middle
1076	PC-3p-174947_22		AAAATCTATGGTGCGAGTTGAACC	down	0.459288	-1.12253	0.471016	5.16634	2.37284	0	7.50934	7.98969	7.11852	0	0	0	8	7	7	0	0	low
1077	PC-3p-510324_5		CTACAAACATCGTGCACTGA	down	0.458597	-1.1247	0.474115	3.51904	1.61382	5.86378	4.69334	0	0	0	4.84146	5	5	0	0	0	5	low
1078	PC-5p-36409_141		CAGTTTCAAATTGCGGTAATGAGC	down	0.70079	-0.512945	0.476215	20.9115	14.6546	15.2458	33.792	13.6966	6.10158	21.4011	16.461	13	36	12	6	21	17	middle
1079	PC-3p-42630_120		TACATATGTTGGACAAGAGGTGCA	down	0.59862	-0.740288	0.476651	11.9105	7.12986	5.86378	7.04	22.8277	6.10158	5.60506	9.68293	5	7.5	20	6	5.5	10	middle
1080	mtr-MIR395l-p5		AGTTCCTTTGAACGCTTCATG	down	0.498642	-1.00392	0.478625	4.1814	2.08502	0	7.97867	4.56554	0	4.07641	2.17866	0	8.5	4	0	4	2.25	middle
1081	mtr-MIR395c-p5		AGTTCCTTTGAACGCTTCATG	down	0.498642	-1.00392	0.478625	4.1814	2.08502	0	7.97867	4.56554	0	4.07641	2.17866	0	8.5	4	0	4	2.25	middle
1082	mtr-MIR395m-p5		AGTTCCTTTGAACGCTTCATG	down	0.498642	-1.00392	0.478625	4.1814	2.08502	0	7.97867	4.56554	0	4.07641	2.17866	0	8.5	4	0	4	2.25	middle
1083	mtr-MIR395a-p5		AGTTCCTTTGAACGCTTCATG	down	0.498642	-1.00392	0.478625	4.1814	2.08502	0	7.97867	4.56554	0	4.07641	2.17866	0	8.5	4	0	4	2.25	middle
1084	PC-3p-92993_53		AAGGCGCGTGAGAACCTCATAGGA	up	2.50153	1.32281	0.480032	2.03378	5.08755	0	6.10134	0	11.1862	4.07641	0	0	6.5	0	11	4	0	middle
1085	mtr-miR397-5p_L-2R+2		ATTGAGTGCAGCGTTGATGAA	down	0.307889	-1.69952	0.480424	39.5672	12.1823	103.203	7.50934	7.98969	7.11852	17.3247	12.1037	88	8	7	7	17	12.5	middle
1086	PC-5p-376758_6		GACGTAATTTACAATAGAACTAGA	down	0.465514	-1.1031	0.481121	4.1601	1.93659	0	5.632	6.84831	0	0	5.80976	0	6	6	0	0	6	low
1087	mtr-MIR5285c-p3_1ss19AG		TTGGGTAGAATTAGGCGGGAGACT	up	1.17922	0.237829	0.484972	27.8507	32.842	24.0415	30.976	28.5346	24.9148	29.554	44.0573	20.5	33	25	24.5	29	45.5	middle
1088	mtr-MIR5285a-p5_1ss18AG		TTGGGTAGAATTAGGCGGGAGACT	up	1.17922	0.237829	0.484972	27.8507	32.842	24.0415	30.976	28.5346	24.9148	29.554	44.0573	20.5	33	25	24.5	29	45.5	middle
1089	mtr-MIR2648-p5_2ss13AG19TA		GCCAATGGGAATGACAGAATC	down	0.681793	-0.552595	0.484987	205.12	139.849	163.6	188.672	263.089	284.232	101.91	33.4061	139.5	201	230.5	279.5	100	34.5	middle
1090	PC-3p-150376_28		TAAAGGCACCAAAGGCACCGAAGT	up	2.11494	1.08062	0.48667	0.938667	1.98522	0	2.816	0	3.05079	0	2.90488	0	3	0	3	0	3	low
1091	mtr-miR156b-5p		TGACAGAAGAGAGTGAGCAC	down	0.798605	-0.324445	0.486718	10823.5	8643.68	13498.4	7543.07	11428.9	7811.98	12854.2	5264.85	11510	8035.94	10013.2	7681.92	12613.3	5437.25	high
1092	gma-miR156a		TGACAGAAGAGAGTGAGCAC	down	0.798605	-0.324445	0.486718	10823.5	8643.68	13498.4	7543.07	11428.9	7811.98	12854.2	5264.85	11510	8035.94	10013.2	7681.92	12613.3	5437.25	high
1093	stu-miR156e		TGACAGAAGAGAGTGAGCAC	down	0.798605	-0.324445	0.486718	10823.5	8643.68	13498.4	7543.07	11428.9	7811.98	12854.2	5264.85	11510	8035.94	10013.2	7681.92	12613.3	5437.25	high
1094	PC-5p-236592_13		TTGAAAATAGTATTCGGAACATTC	down	0.539034	-0.891551	0.488101	4.19147	2.25935	3.51827	5.632	3.42415	0	0	6.77805	3	6	3	0	0	7	low
1095	PC-5p-149236_28		AACTTACGTTGGCACTTTTAAGAT	down	0.514348	-0.959184	0.488392	4.07889	2.09797	7.03654	2.34667	2.85346	0	0	6.2939	6	2.5	2.5	0	0	6.5	low
1096	mtr-miR156e		TTGACAGAAGATAGAGAGCAC	up	1.76469	0.819414	0.49048	81.6653	144.114	125.716	47.1894	72.0905	280.371	123.793	28.1773	107.197	50.2727	63.1606	275.703	121.473	29.1	middle
1097	gma-miR156c		TTGACAGAAGATAGAGAGCAC	up	1.76469	0.819414	0.49048	81.6653	144.114	125.716	47.1894	72.0905	280.371	123.793	28.1773	107.197	50.2727	63.1606	275.703	121.473	29.1	middle
1098	mes-miR156h		TTGACAGAAGATAGAGAGCAC	up	1.76469	0.819414	0.49048	81.6653	144.114	125.716	47.1894	72.0905	280.371	123.793	28.1773	107.197	50.2727	63.1606	275.703	121.473	29.1	middle
1099	cpa-miR156e		TTGACAGAAGATAGAGAGCAC	up	1.76469	0.819414	0.49048	81.6653	144.114	125.716	47.1894	72.0905	280.371	123.793	28.1773	107.197	50.2727	63.1606	275.703	121.473	29.1	middle
1100	mtr-miR166d_4ss5GA15AG17CT21CA		TCGGACCAGGCTTCGTTCCCA	up	1.34333	0.425812	0.492004	79.9091	107.344	116.689	45.9947	77.0434	112.879	155.413	53.7402	99.5	49	67.5	111	152.5	55.5	middle
1101	gma-miR166a-3p_L+1		ATCGGACCAGGCTTCATTCCCC	down	0.746615	-0.421564	0.494104	9.09604	6.79124	6.45016	6.57067	14.2673	4.57619	6.11461	9.68293	5.5	7	12.5	4.5	6	10	middle
1102	mdm-MIR166b-p5_2ss15TC21TC		TGTGGGGAATGCTGCCTGGTC	up	1.16901	0.22529	0.495469	11.6764	13.6499	12.3139	8.448	14.2673	9.66084	15.7961	15.4927	10.5	9	12.5	9.5	15.5	16	middle
1103	stu-miR167c-3p_2ss10CG11GT		GGTCATGCTGTGACAGCCTCACT	down	0.697465	-0.519807	0.496951	10.7047	7.46618	7.62292	10.7947	13.6966	10.1693	12.2292	0	6.5	11.5	12	10	12	0	middle
1104	gma-miR164a_R+2		TGGAGAAGCAGGGCACGTGCATT	up	1.3421	0.424494	0.50013	17.3956	23.3467	11.1412	31.9147	9.13107	24.4063	21.9107	23.7232	9.5	34	8	24	21.5	24.5	middle
1105	PC-5p-74157_68		TATGTTGCTACTCGACCATTCATG	up	1.66555	0.736002	0.500755	4.63428	7.71864	2.93189	4.69334	6.27761	2.54233	5.60506	15.0085	2.5	5	5.5	2.5	5.5	15.5	middle
1106	hex-MIR390a-p5_1ss21GA		TAAGAAGAATAAGCTCAGGAA	down	0.813746	-0.297349	0.501152	31.7881	25.8674	37.5282	28.16	29.676	38.6434	14.2674	24.6915	32	30	26	38	14	25.5	middle
1107	mtr-miR5559-3p_1ss6TC		TCTAACTATTCACCAAGTAAA	up	3.15404	1.6572	0.501795	4.30011	13.5627	12.9003	0	0	35.5926	5.09551	0	11	0	0	35	5	0	middle
1108	mtr-MIR5758-p5_1ss10AG		AAATACATTGCTCCAACTTACACC	up	2.08055	1.05697	0.501986	0.951153	1.97893	0	0	2.85346	0	2.54776	3.38902	0	0	2.5	0	2.5	3.5	low
1109	mtr-MIR2587e-p3_1ss11AC		AACAGAGACCCTTGACATCAAAGA	down	0.867217	-0.205535	0.503288	65.4218	56.7349	45.6202	82.3524	68.2928	53.6261	59.4816	57.097	38.9	87.7333	59.8333	52.7333	58.3667	58.9667	middle
1110	mtr-MIR2587f-p3_1ss10TC		AACAGAGACCCTTGACATCAAAGA	down	0.867217	-0.205535	0.503288	65.4218	56.7349	45.6202	82.3524	68.2928	53.6261	59.4816	57.097	38.9	87.7333	59.8333	52.7333	58.3667	58.9667	middle
1111	mtr-MIR2586a-p5		AGCACGGATACGGACACGGACACC	up	1.23207	0.301085	0.503332	145.775	179.605	116.103	177.408	143.814	176.946	111.082	250.788	99	189	126	174	109	259	middle
1112	gma-MIR1509a-p5_2ss8AG18GA		TTAATCAGGGAAATCACAGT	up	1.83875	0.878726	0.504543	2.97245	5.46559	0	8.91734	0	5.59312	3.05731	7.74634	0	9.5	0	5.5	3	8	low
1113	PC-3p-26979_187		TCATGGATGAAAATTTTTGGAAGGT	down	0.76936	-0.378269	0.50464	27.6216	21.2509	24.0415	18.304	40.5191	10.1693	25.9871	27.5963	20.5	19.5	35.5	10	25.5	28.5	middle
1114	mtr-miR396b-5p		TTCCACAGCTTTCTTGAACTG	down	0.843721	-0.245161	0.50549	13053.8	11013.8	14646	10262.9	14252.5	13767.2	12928.8	6345.22	12488.5	10933.5	12487	13538	12686.5	6553	high
1115	mtr-MIR5244-p3_1ss1CG		GATGAAGATTGTTGGTCTTTA	down	0.758691	-0.398415	0.505579	28.3037	21.4738	37.5282	13.1413	34.2415	18.3048	31.5922	14.5244	32	14	30	18	31	15	middle
1116	gma-miR166a-3p_1ss21CT		TCGGACCAGGCTTCATTCCCT	up	1.09464	0.130458	0.505638	335.992	367.791	306.089	362.326	339.562	337.113	443.819	322.441	261	386	297.5	331.5	435.5	333	middle
1117	PC-3p-153209_27		AAATGCCGAGCGTGAGTTAACTCA	down	0.445912	-1.16517	0.506606	3.80094	1.69488	0	7.97867	3.42415	5.08465	0	0	0	8.5	3	5	0	0	low
1118	PC-5p-160957_25		GGTGACAGATAGAGAGTAAGC	down	0.194101	-2.36512	0.50671	4.37531	0.849252	0	0	13.1259	0	2.54776	0	0	0	11.5	0	2.5	0	middle
1119	mtr-MIR169a-p3		AGTTGTCCTTGGCTATGTTAGTCT	up	1.31414	0.394124	0.50701	25.2284	33.1538	12.9003	42.24	20.5449	28.4741	25.4776	45.5098	11	45	18	28	25	47	middle
1120	mtr-miR408-5p		ACAGGGAACATGCAGAGCATG	down	0.555493	-0.848159	0.50737	68.8055	38.221	143.076	29.0987	34.2415	19.3217	67.2607	28.0805	122	31	30	19	66	29	middle
1121	mtr-miR5208a_L-2R+3		CATGGATGTTGTGAGTTTGTTCAC	down	0.433409	-1.2062	0.507763	4.30165	1.86437	3.51827	9.38667	0	5.59312	0	0	3	10	0	5.5	0	0	middle
1122	PC-3p-75161_67		AAGTAAGGTTGTCACAAAAGTTGT	up	1.41255	0.498302	0.508892	3.31031	4.67598	0	4.224	5.70692	5.08465	4.58596	4.35732	0	4.5	5	5	4.5	4.5	low
1123	mtr-MIR2600a-p3_1ss11GA		AAACATTGTGACATTGTGATTGGC	down	0.555659	-0.847727	0.510041	3.28621	1.82601	5.86378	0	3.99484	0	3.05731	2.42073	5	0	3.5	0	3	2.5	middle
1124	PC-3p-25539_196		ACTCAGTACTAAATTTCTCTAACT	down	0.839853	-0.251792	0.511701	15.2381	12.7977	18.1777	17.8347	9.70177	13.7286	9.17192	15.4927	15.5	19	8.5	13.5	9	16	middle
1125	mtr-MIR5557-p5		CAGGACACTTCTCAACAAGTA	up	1.80566	0.852528	0.512965	7.70334	13.9096	10.5548	0	12.5552	25.4233	16.3056	0	9	0	11	25	16	0	middle
1126	PC-3p-22057_225		TGAGTTTTCCAGTTTGGTCATT	up	1.51015	0.594689	0.513037	10.5382	15.9143	14.0731	11.264	6.27761	2.54233	22.9298	22.2707	12	12	5.5	2.5	22.5	23	middle
1127	nta-MIR167a-p3_2ss9GC20TG		TTCGAAAACAAAATGGAATGT	down	0.496969	-1.00877	0.516408	2.04627	1.01693	0	3.28534	2.85346	3.05079	0	0	0	3.5	2.5	3	0	0	low
1128	gma-miR159a-3p_R+4		TTTGGATTGAAGGGAGCTCTACACC	down	0.741826	-0.430848	0.516483	9.29829	6.89771	8.2093	14.5493	5.13623	9.66084	7.64327	3.38902	7	15.5	4.5	9.5	7.5	3.5	middle
1129	PC-5p-6997_633		GGAACGTCTTCTGGTTCGAGA	up	1.61301	0.689755	0.5169	30.3054	48.883	49.2558	0	41.6605	25.9317	90.7001	30.0171	42	0	36.5	25.5	89	31	middle
1130	vvi-miR399i_1ss15TC		CGCCAAAGGAGAGTCGCCCTG	up	2.36349	1.24092	0.517655	2.61977	6.1918	4.10465	3.75467	0	0	3.56686	15.0085	3.5	4	0	0	3.5	15.5	middle
1131	PC-3p-265933_11		TGTCACCAAATACTATGTCACCCA	down	0.49803	-1.00569	0.517658	4.09253	2.0382	0	6.57067	5.70692	0	6.11461	0	0	7	5	0	6	0	low
1132	mtr-MIR1510a-p5_2ss2AT21TA		TTGGTAAAACAACTATTGCAA	down	0.511644	-0.966789	0.517688	4.64192	2.37501	0	4.224	9.70177	4.06772	3.05731	0	0	4.5	8.5	4	3	0	low
1133	mtr-MIR166f-p3		AATGAGGTTTGTTCCAAGATC	up	1.23372	0.303019	0.520215	6.04674	7.46	8.2093	4.224	5.70692	7.62698	4.58596	10.1671	7	4.5	5	7.5	4.5	10.5	middle
1134	PC-5p-16979_287		CAGCTCGTCGGTGGCCGTTGGA	down	0.834121	-0.261672	0.522141	14.5861	12.1666	15.2458	15.9573	12.5552	17.2878	6.62416	12.5878	13	17	11	17	6.5	13	middle
1135	mtr-MIR2088-p5_1ss2CT		TTTGTATCTCGAAGTAGACGG	down	0.802475	-0.317472	0.522813	85.8739	68.9116	72.7109	92.4587	92.4521	25.4233	92.2287	89.0829	62	98.5	81	25	90.5	92	middle
1136	mtr-MIR5282-p5_2ss6CT22TA		AATTCTTTGGTCGCAAAATTTAGT	up	2.01696	1.01219	0.523274	3.12889	6.31086	0	9.38667	0	11.1862	0	7.74634	0	10	0	11	0	8	middle
1137	mtr-MIR166b-p5		GGAATGTTGTTTGGCTCGAGG	down	0.842537	-0.247188	0.523635	403.561	340.015	344.79	303.189	562.702	296.944	403.564	319.537	294	323	493	292	396	330	middle
1138	mtr-MIR2620-p5_2ss5TC17GA_2		AGTTCGAAAGTATTGTAGGGAA	down	0.575109	-0.798093	0.52404	3.24555	1.86654	4.10465	5.632	0	2.54233	3.05731	0	3.5	6	0	2.5	3	0	low
1139	mtr-MIR2620-p3_2ss5TC17GA		AGTTCGAAAGTATTGTAGGGAA	down	0.575109	-0.798093	0.52404	3.24555	1.86654	4.10465	5.632	0	2.54233	3.05731	0	3.5	6	0	2.5	3	0	low
1140	mtr-MIR5271e-p3_1ss22GA		ACGGTTCAGTTCGGTTAGTGAATT	down	0.570998	-0.808442	0.524253	3.09045	1.76464	0	3.75467	5.51669	2.71182	0	2.58211	0	4	4.83333	2.66667	0	2.66667	low
1141	mtr-miR2585a_L+1R+1_1ss10GA		TCAGGATTAACGATTACAGGGACC	up	1.98812	0.991404	0.524412	0.938667	1.86618	0	2.816	0	3.05079	2.54776	0	0	3	0	3	2.5	0	low
1142	PC-3p-117730_39		AAAATCATGGTGGGTCGTCGTGAT	down	0.422994	-1.24129	0.526173	10.4179	4.4067	0	24.4053	6.84831	13.2201	0	0	0	26	6	13	0	0	middle
1143	PC-5p-2431_1512		CTATGTTGCCTCAATCAGACCAGA	down	0.676844	-0.563105	0.526423	94.317	63.8379	89.1295	130.475	63.3468	10.1693	44.3309	137.013	76	139	55.5	10	43.5	141.5	middle
1144	mtr-MIR2619a-p5_1ss22AG		TATTGGATCTTTGACAGTTTTGGC	up	1.21318	0.278795	0.527008	9.39965	11.4035	8.2093	13.1413	6.84831	15.254	11.2101	7.74634	7	14	6	15	11	8	middle
1145	PC-5p-20916_236		GACGAGTTTGTTGGGTTGTAGGTG	up	1.40306	0.488578	0.527403	21.7079	30.4576	17.005	15.0187	33.1001	9.66084	46.3691	35.3427	14.5	16	29	9.5	45.5	36.5	middle
1146	PC-3p-143281_30		AGGGTGGTTACATATAAGGACGGA	up	1.98386	0.98831	0.527776	2.73643	5.4287	8.2093	0	0	9.15238	7.13371	0	7	0	0	9	7	0	low
1147	PC-5p-43124_119		CTATGAGAAACTGCCCAACCCATC	down	0.706339	-0.501568	0.527952	7.92407	5.59708	8.2093	9.85601	5.70692	0	6.62416	10.1671	7	10.5	5	0	6.5	10.5	middle
1148	PC-3p-40872_126		CAAGGTTCAGGATTTGGGTCT	down	0.603387	-0.728846	0.528328	28.9604	17.4743	13.4867	16.896	56.4985	28.4741	23.9489	0	11.5	18	49.5	28	23.5	0	middle
1149	PC-3p-56825_90		TTGGTTCTGTCATTTCCATTG	down	0.58879	-0.764175	0.530192	3.74586	2.20552	0	6.10134	5.13623	3.55926	3.05731	0	0	6.5	4.5	3.5	3	0	middle
1150	ptc-miR6478_R-1		CCGACCTTAGCTCAGTTGGT	down	0.858299	-0.220447	0.530462	40.5081	34.7681	49.2558	30.0373	42.2312	26.4402	46.8787	30.9854	42	32	37	26	46	32	middle
1151	mtr-MIR2655n-p3		TGAATTAAATTAACAGAAAGGACC	up	1.53534	0.618559	0.533124	4.89605	7.51711	0	11.264	3.42415	10.6778	5.09551	6.77805	0	12	3	10.5	5	7	middle
1152	mtr-MIR2655f-p3		TGAATTAAATTAACAGAAAGGACC	up	1.53534	0.618559	0.533124	4.89605	7.51711	0	11.264	3.42415	10.6778	5.09551	6.77805	0	12	3	10.5	5	7	middle
1153	PC-5p-76669_66		AACATCTGAGACTATTGATCGAGA	up	1.28059	0.356804	0.533586	8.1324	10.4142	6.45016	9.38667	8.56038	9.66084	5.60506	15.9768	5.5	10	7.5	9.5	5.5	16.5	middle
1154	gma-miR1509a_L+1R-1_1ss19GA		CTTAATCAAGGAAATCACAGTC	up	1.96443	0.974111	0.534499	1.52185	2.98956	0	0	4.56554	0	5.09551	3.87317	0	0	4	0	5	4	low
1155	PC-5p-172040_22		TGGTGACAGATAGAGAGTAAGC	down	0.251118	-1.99356	0.535695	6.08738	1.52865	0	0	18.2621	0	4.58596	0	0	0	16	0	4.5	0	middle
1156	PC-3p-300_8391		TCTCAAAGACATAAGGAACCTC	down	0.652423	-0.616121	0.535829	557.589	363.783	752.323	449.622	470.821	864.391	192.101	34.8585	641.5	479	412.5	850	188.5	36	middle
1157	PC-3p-12669_377		TCAGGATTTGGGTCATAACAA	down	0.731127	-0.451805	0.536113	90.9954	66.5292	96.7524	79.7867	96.447	121.523	70.318	7.74634	82.5	85	84.5	119.5	69	8	middle
1158	stu-MIR482a-p3_2ss19CT20CT		TTTCCAATTCCACCCATTTT	up	1.37336	0.457714	0.536608	7.05018	9.68246	14.0731	4.224	2.85346	11.1862	8.66237	9.19878	12	4.5	2.5	11	8.5	9.5	middle
1159	ath-miR167c-5p_L+1R+1_2ss2TG22GA		TGAAGCTGCCAGCATGATCTTAT	down	0.590128	-0.760899	0.53872	6.21723	3.66896	8.79567	9.85601	0	0	7.13371	3.87317	7.5	10.5	0	0	7	4	low
1160	mdm-miR167h_R+1		TGAAGCTGCCAGCATGATCTTAT	down	0.590128	-0.760899	0.53872	6.21723	3.66896	8.79567	9.85601	0	0	7.13371	3.87317	7.5	10.5	0	0	7	4	low
1161	mtr-MIR2670e-p5		AGTGGTCCGTTAGGTTGGGGA	down	0.670548	-0.576587	0.539957	99.0547	66.4209	56.2923	68.5227	172.349	111.862	5.09551	82.3049	48	73	151	110	5	85	middle
1162	PC-5p-16360_297		TTATCTATAGGAAACCATTATGTA	up	1.21781	0.284284	0.541223	57.931	70.5486	45.7375	83.5414	44.514	61.5243	97.8338	52.2878	39	89	39	60.5	96	54	middle
1163	PC-3p-290552_9		TAACGGAGCAAAACATAGAGGACC	down	0.265109	-1.91534	0.543141	6.08738	1.61382	0	0	18.2621	0	0	4.84146	0	0	16	0	0	5	middle
1164	PC-5p-100852_48		TGTTTCGGGCACTCTTTAAGCATC	down	0.621488	-0.6862	0.543902	11.8545	7.36745	0	15.0187	20.5449	6.10158	10.191	5.80976	0	16	18	6	10	6	middle
1165	mtr-MIR2599-p3_1ss21AC		AGATTCCTTGTACCCACATGCTTT	up	1.95442	0.966741	0.544068	2.19022	4.28062	0	6.57067	0	0	5.09551	7.74634	0	7	0	0	5	8	low
1166	mtr-miR1510a-3p_L-1R+1		GGAGGATTAGGTAAAACAACT	up	1.11809	0.161038	0.547643	1056.37	1181.12	1155.75	782.379	1230.98	937.102	1225.47	1380.79	985.5	833.5	1078.5	921.5	1202.5	1426	high
1167	PC-5p-69023_74		AAGGAGATTCAGTGCACGATG	down	0.612459	-0.707315	0.548155	5.70849	3.49622	10.5548	6.57067	0	4.06772	2.54776	3.87317	9	7	0	4	2.5	4	middle
1168	ath-miR167c-5p_L+1R-1		TTAAGCTGCCAGCATGATCTT	down	0.50367	-0.989448	0.548287	2.6978	1.3588	5.2774	2.816	0	0	4.07641	0	4.5	3	0	0	4	0	low
1169	mtr-MIR2592bl-p3_2ss10CT21GA		ACAATTGTCTTCCTCTGGATA	up	3.62075	1.85629	0.54913	0.469103	1.6985	1.40731	0	0	0	5.09551	0	1.2	0	0	0	5	0	low
1170	PC-5p-89651_55		AAAGACATGATAGGATAAAGAGGT	up	1.8675	0.901111	0.550168	3.24274	6.05582	0	5.16267	4.56554	0	5.09551	13.072	0	5.5	4	0	5	13.5	middle
1171	PC-5p-41787_123		AGCGGTTGGTACAATGCAATA	up	1.43596	0.522013	0.550814	7.27294	10.4436	10.5548	11.264	0	4.06772	12.7388	14.5244	9	12	0	4	12.5	15	middle
1172	gma-miR394a-5p_L+1R-1		TTTGGCATTCTGTCCACCTC	up	1.21225	0.277685	0.551036	16.0264	19.4279	24.6279	10.3253	13.1259	17.7963	15.7961	24.6915	21	11	11.5	17.5	15.5	25.5	middle
1173	fve-miR156a_L-1R+2_1ss10GT		TGACAGAATAGAGTGAGCACTT	up	1.42001	0.5059	0.551927	381.379	541.562	551.196	29.0987	563.844	368.129	887.638	368.919	470	31	494	362	871	381	middle
1174	PC-3p-24634_203		TGGATGAAAATTTTTGGAAGGT	down	0.750084	-0.414876	0.55341	14.6675	11.0018	18.7641	4.69334	20.5449	7.11852	14.2674	11.6195	16	5	18	7	14	12	middle
1175	PC-5p-53634_96		TGACAGAGTTGATACGATGCAG	up	1.46434	0.550246	0.55383	7.99483	11.7071	0	13.1413	10.8431	7.11852	8.15282	19.85	0	14	9.5	7	8	20.5	middle
1176	mtr-MIR5277-p5_1ss21TC		CTTGGACTTCAAGAAACAACCTTG	up	1.41121	0.496937	0.554657	311.148	439.096	292.016	459.947	181.48	199.318	341.399	776.571	249	490	159	196	335	802	middle
1177	mtr-miR166a		TCGGACCAGGCTTCATTCCCC	up	1.05848	0.0819904	0.55598	107994	114310	110769	91388.4	121825	110617	118858	113453	94452.2	97359.7	106735	108775	116631	117169	high
1178	mtr-miR2669a_L-1R+3_1ss12TA		AAGTTCAGTCATCATAGTATCATC	up	1.71658	0.779541	0.556913	4.30011	7.3815	12.9003	0	0	10.1693	7.13371	4.84146	11	0	0	10	7	5	middle
1179	mtr-MIR5281a-p5_2ss15AG23TC		AATGTATGTATCTAGTCAAGAACC	up	1.10761	0.147446	0.557108	334.404	370.388	252.143	426.155	324.914	342.706	400.507	367.951	215	454	284.667	337	393	380	middle
1180	PC-3p-160484_25		AGACTATTTGGACTAGCGAAGTGC	up	1.88544	0.9149	0.558119	1.73338	3.26817	0	2.34667	2.85346	2.54233	0	7.26219	0	2.5	2.5	2.5	0	7.5	low
1181	lja-MIR167-p3		GATCATATGGCAGCTTCACC	up	1.23787	0.30786	0.558776	869.998	1076.94	1116.46	684.288	809.241	806.426	1646.87	777.539	952	729	709	793	1616	803	high
1182	PC-5p-2355_1557		TGTTGGTGGAGATAGCTCATTC	down	0.746905	-0.421003	0.558788	176.227	131.625	208.164	80.256	240.261	78.3037	231.846	84.7256	177.5	85.5	210.5	77	227.5	87.5	middle
1183	gma-miR394a-5p_L+1_1ss21CA		TTTGGCATTCTGTCCACCTCA	up	1.50705	0.591727	0.558909	4.06602	6.12769	9.38205	2.816	0	6.10158	3.56686	8.71463	8	3	0	6	3.5	9	middle
1184	mtr-MIR5298d-p5_1ss20AG		TGGGATTCTTGTTGTTGAAGGTTG	up	1.86891	0.9022	0.560254	4.06756	7.60192	0	12.2027	0	11.1862	0	11.6195	0	13	0	11	0	12	middle
1185	mtr-MIR5289a-p3_1ss8CT		AGGAAAATTGAAAACTTCGGCAGT	up	1.19394	0.255728	0.561176	77.513	92.5457	41.0465	91.0507	100.442	110.845	63.1843	103.607	35	97	88	109	62	107	middle
1186	mtr-MIR5286a-p5		TGTCCAGTGTTTGATTTGTAAAAC	up	1.88866	0.917361	0.562395	2.39294	4.51944	0	3.75467	3.42415	10.1693	0	3.38902	0	4	3	10	0	3.5	middle
1187	mtr-MIR5286b-p5		TGTCCAGTGTTTGATTTGTAAAAC	up	1.88866	0.917361	0.562395	2.39294	4.51944	0	3.75467	3.42415	10.1693	0	3.38902	0	4	3	10	0	3.5	middle
1188	mtr-MIR2600e-p3_2ss10GA22GA		AGCATTGTGACATTGTGATTGACC	up	1.38636	0.471307	0.562763	5.30149	7.34979	0	5.632	10.2725	7.11852	8.15282	6.77805	0	6	9	7	8	7	middle
1189	gma-MIR1511-p5_1ss6AG		GTGGTGTCAGGTCCTGCTTCA	down	0.537513	-0.895628	0.563086	19.5916	10.5307	0	29.0987	29.676	0	31.5922	0	0	31	26	0	31	0	middle
1190	PC-3p-69133_74		TGACGTCGGCACCAATAATGA	down	0.608088	-0.717648	0.563331	10.5986	6.4449	15.2458	0	16.5501	13.2201	6.11461	0	13	0	14.5	13	6	0	middle
1191	mtr-MIR5287a-p5_2ss5GA24TC		TTCAATTAATGATGTATGTGGTCC	up	1.21967	0.286492	0.566213	71.9097	87.7061	36.3554	115.456	63.9175	84.4053	88.6619	90.0512	31	123	56	83	87	93	middle
1192	mtr-miR5292a		ATTCAGATGATAGCAACAAAGAGC	down	0.868931	-0.202686	0.566909	62.6473	54.4362	47.4966	81.664	58.7813	65.0836	37.7068	60.5183	40.5	87	51.5	64	37	62.5	middle
1193	PC-5p-152040_27		TCGTTAGTCATTCATAATGTT	down	0.525323	-0.928723	0.567489	2.15044	1.12967	4.10465	2.34667	0	0	0	3.38902	3.5	2.5	0	0	0	3.5	low
1194	PC-3p-222385_14		GATAGTTGTCGATGTAATCATTGC	down	0.309689	-1.69111	0.56774	5.47286	1.69488	16.4186	0	0	5.08465	0	0	14	0	0	5	0	0	middle
1195	PC-3p-434_6251		TCGTGCACTGAATCTCTTTTAC	down	0.810512	-0.303095	0.568978	410.306	332.558	346.55	608.726	275.644	248.64	273.119	475.916	295.5	648.5	241.5	244.5	268	491.5	middle
1196	mtr-MIR2088-p5_1ss2TA		AATACATTGGACAAAACAGTC	down	0.808156	-0.307294	0.569438	56.5894	45.7331	43.392	59.6054	66.771	15.254	57.0697	64.8756	37	63.5	58.5	15	56	67	middle
1197	PC-5p-34467_148		CAAAAGTATGAATTAGTGTTGGTC	up	1.34425	0.426797	0.570557	18.6807	25.1114	14.0731	19.712	22.257	39.1518	7.13371	29.0488	12	21	19.5	38.5	7	30	middle
1198	mtr-miR5743a		TGAGAACTGTTTTCCGCACCTT	up	1.3621	0.445829	0.571984	139.46	189.958	17.5913	173.653	227.135	177.963	286.368	105.544	15	185	199	175	281	109	middle
1199	PC-3p-122959_37		ATAAAGAACATCAAAATGGGCAGC	up	1.83731	0.877592	0.573575	1.17276	2.15471	3.51827	0	0	3.55926	0	2.90488	3	0	0	3.5	0	3	low
1200	mtr-miR2600e_L-1R+1_1ss11GA		AGCATTGTGACATTGTGATTGGCC	up	1.34616	0.428846	0.575172	4.43921	5.97586	0	7.04	6.27761	4.57619	5.60506	7.74634	0	7.5	5.5	4.5	5.5	8	low
1201	mtr-miR171g_1ss17CT		CGAGCCGAATCAATATTACTC	down	0.865804	-0.207888	0.575327	70.9034	61.3885	60.9833	55.8507	95.8763	70.1682	43.3118	70.6854	52	59.5	84	69	42.5	73	middle
1202	PC-5p-158331_25		AAATAGTCTTTGGACACACTCACA	down	0.54403	-0.878243	0.57596	7.89949	4.29755	5.86378	17.8347	0	0	6.11461	6.77805	5	19	0	0	6	7	middle
1203	gra-miR482_L-2R+1_1ss14TA		TTTCCAATTCCACCCATTCCT	up	1.10612	0.145503	0.576268	122.98	136.03	106.721	144.085	118.133	146.946	100.891	160.252	91	153.5	103.5	144.5	99	165.5	middle
1204	PC-5p-28575_177		TTTGATCCAAAAGCGGTGATT	down	0.700358	-0.513834	0.579561	12.2555	8.58326	4.69103	12.672	19.4035	4.06772	17.3247	4.35732	4	13.5	17	4	17	4.5	middle
1205	gma-miR4415b-5p_R-3_1ss2AT		ATGTTGTGATGGGAATCAATG	down	0.538344	-0.893399	0.579839	8.09302	4.35683	18.1777	6.10134	0	0	9.68147	3.38902	15.5	6.5	0	0	9.5	3.5	middle
1206	ppe-miR530_L+2R-2		TATCTGCATTTGCACCTGCAC	up	1.12177	0.165781	0.580077	8.30656	9.31808	7.03654	7.04	10.8431	10.1693	7.13371	10.6512	6	7.5	9.5	10	7	11	middle
1207	ath-miR8175_L+3		TTCGATCCCCGGCAACGGCGCCA	down	0.930494	-0.103932	0.580298	15.4488	14.375	12.9003	16.896	16.5501	16.7794	13.7579	12.5878	11	18	14.5	16.5	13.5	13	middle
1208	gma-MIR1525-p3_2ss3AG19AG		GTGTGATTTTATTTTGTAGGGACT	up	1.11209	0.153268	0.580298	131.278	145.993	118.448	162.389	112.997	119.998	182.419	135.561	101	173	99	118	179	140	middle
1209	mtr-MIR2636-p3_2ss7TG17AC		TGAATAGAGTAGATTCCTTGTACC	up	1.81073	0.856575	0.580953	2.73643	4.95495	8.2093	0	0	7.11852	0	7.74634	7	0	0	7	0	8	low
1210	PC-3p-120072_38		AAGGGATAATGCAAATGAGAGGAA	up	1.47415	0.559879	0.581121	3.71411	5.47514	8.79567	2.34667	0	4.06772	5.09551	7.26219	7.5	2.5	0	4	5	7.5	low
1211	mtr-MIR2671h-p5		TTTTGGTTTCGTTTTGGTCCC	down	0.835847	-0.258689	0.582021	59.6463	49.8552	87.2726	42.3965	49.2698	60.3379	54.6918	34.5358	74.4167	45.1667	43.1667	59.3333	53.6667	35.6667	middle
1212	mtr-MIR2671d-p5		TTTTGGTTTCGTTTTGGTCCC	down	0.835847	-0.258689	0.582021	59.6463	49.8552	87.2726	42.3965	49.2698	60.3379	54.6918	34.5358	74.4167	45.1667	43.1667	59.3333	53.6667	35.6667	middle
1213	mtr-MIR2671g-p5		TTTTGGTTTCGTTTTGGTCCC	down	0.835847	-0.258689	0.582021	59.6463	49.8552	87.2726	42.3965	49.2698	60.3379	54.6918	34.5358	74.4167	45.1667	43.1667	59.3333	53.6667	35.6667	middle
1214	PC-3p-190295_19		AATGTTCTTAACTTGTGCCCT	up	1.84669	0.884939	0.583311	2.34551	4.33143	7.03654	0	0	0	8.15282	4.84146	6	0	0	0	8	5	low
1215	mes-MIR167a-p5_1ss11TC		GTTTGAGAGGCTGAAGCTGC	down	0.632167	-0.661623	0.584412	2.61696	1.65435	0	3.28534	4.56554	2.54233	0	2.42073	0	3.5	4	2.5	0	2.5	low
1216	mtr-miR172d-5p_L-3		GGAGCATCATCAAGATTCACA	up	1.24442	0.315475	0.585816	58.4227	72.7025	63.3288	36.608	75.3314	113.896	50.9551	53.2561	54	39	66	112	50	55	middle
1217	mtr-MIR2648-p3_2ss10CT22AT		TTCTGTCATTTCCATTGTGTTT	down	0.579807	-0.786355	0.58643	7.30797	4.23721	4.10465	4.69334	13.1259	12.7116	0	0	3.5	5	11.5	12.5	0	0	middle
1218	PC-5p-172729_22		ACTCGATAATGTCGGCCTGCT	down	0.344023	-1.53942	0.587568	4.69103	1.61382	14.0731	0	0	0	0	4.84146	12	0	0	0	0	5	middle
1219	PC-3p-120048_38		TTGTACTATAACTACTGCATG	down	0.60824	-0.717287	0.588108	6.13038	3.72875	7.62292	5.632	5.13623	11.1862	0	0	6.5	6	4.5	11	0	0	middle
1220	mtr-miR5256_1ss20AG		TAATGGATTATGTAAGATTGA	up	1.21335	0.278997	0.588631	11.4383	13.8786	11.1412	16.896	6.27761	10.1693	19.3629	12.1037	9.5	18	5.5	10	19	12.5	middle
1221	PC-5p-40729_126		TTGCTTGGTGCAGGTCGAGGATC	up	2.29647	1.19942	0.591573	5.0071	11.4987	5.86378	5.16267	3.99484	2.54233	0	31.9537	5	5.5	3.5	2.5	0	33	middle
1222	PC-5p-234572_13		TAAAATGTGACGATTAAAAAGGAA	up	2.81678	1.49405	0.59407	1.56445	4.4067	0	4.69334	0	13.2201	0	0	0	5	0	13	0	0	middle
1223	gma-miR5770b_L+1R-1_1ss12GA		TTTAGGACTATAGTTTGGACA	up	1.58075	0.660605	0.594302	35.0628	55.4254	79.7474	3.75467	21.6863	33.0502	108.534	24.6915	68	4	19	32.5	106.5	25.5	middle
1224	mtr-MIR2671h-p3_2ss8AG19AG		AGGACCAGAGTGGTTGACGGAGGA	down	0.914337	-0.129202	0.595052	203.416	185.991	183.145	249.998	177.105	220.843	155.413	181.716	156.167	266.333	155.167	217.167	152.5	187.667	middle
1225	gma-miR1527_R+4_1ss8AT		TAACTCATCCTTACAAAACCGGCT	up	1.18878	0.249477	0.59522	62.6661	74.496	50.4285	97.6214	39.9484	78.3037	57.0697	88.1146	43	104	35	77	56	91	middle
1226	PC-3p-126259_35		ATGTCACCAATGTCACCCAACTCT	down	0.648922	-0.623882	0.596834	2.54938	1.65435	0	4.224	3.42415	2.54233	0	2.42073	0	4.5	3	2.5	0	2.5	low
1227	ptc-miR162a_R+1		TCGATAAACCTCTGCATCCAGT	up	1.1361	0.184091	0.596938	40.4558	45.9619	53.3604	28.6293	39.3778	38.1349	58.5984	41.1524	45.5	30.5	34.5	37.5	57.5	42.5	middle
1228	gma-miR1511_R-2		AACCAGGCTCTGATACCA	up	1.16507	0.220418	0.59794	496.696	578.687	446.82	454.315	588.954	753.546	654.264	328.251	381	484	516	741	642	339	middle
1229	mtr-MIR2675-p3_1ss10GA		CAAAACGAGACATATTTGCAGGGA	down	0.804084	-0.314582	0.598166	178.901	143.851	70.3654	208.384	257.953	147.455	124.33	159.768	60	222	226	145	122	165	middle
1230	PC-3p-158222_25		CTACGCACACTGAGTTTACATACA	up	2.74591	1.45728	0.599546	2.34551	6.44056	7.03654	0	0	19.3217	0	0	6	0	0	19	0	0	middle
1231	mtr-MIR2620-p5_2ss6TC18GA_1		CAGTTCGAAAGTATTGTAGGG	up	2.71472	1.4408	0.602062	0.951153	2.58211	0	0	2.85346	0	0	7.74634	0	0	2.5	0	0	8	low
1232	PC-3p-19206_256		TCGAATCGGTATCTGGTTGCGGAT	up	1.19915	0.262015	0.603916	64.288	77.0912	36.9418	105.131	50.7916	71.1852	74.3945	85.6939	31.5	112	44.5	70	73	88.5	middle
1233	gma-MIR1509b-p5_2ss7AG17GA		TAATCAGGGAAATCACAGTT	up	1.3346	0.416411	0.604669	21.3367	28.476	14.6595	22.528	26.8225	14.7455	19.3629	51.3195	12.5	24	23.5	14.5	19	53	middle
1234	mtr-miR166d_L+2R-2_3ss7GA17AG19CT		TTTCGGACCAGGCTTCGTTCC	up	1.15846	0.212207	0.605029	818.606	948.322	1087.73	604.502	763.586	1014.39	1223.94	606.635	927.5	644	669	997.5	1201	626.5	high
1235	gma-miR166a-3p_L+2R-2_1ss17AG		TTTCGGACCAGGCTTCGTTCC	up	1.15846	0.212207	0.605029	818.606	948.322	1087.73	604.502	763.586	1014.39	1223.94	606.635	927.5	644	669	997.5	1201	626.5	high
1236	ath-miR159c_R+1_2ss19CA20CT		TTTGGATTGAAGGGAGCTATTT	down	0.735212	-0.443768	0.606192	6.76942	4.97695	2.93189	9.38667	7.98969	0	8.15282	6.77805	2.5	10	7	0	8	7	low
1237	mtr-miR2643a		TTTGGGATCAGAAATTAGAGA	down	0.889543	-0.168864	0.607021	35522.7	31599	43409.6	28977.6	34181	37128.1	37234.9	20433.9	37015	30871	29947	36510	36537	21103	high
1238	mtr-MIR2612-p3_1		TAGTTGACATTATCAAATACA	up	1.73931	0.798517	0.607352	0.951153	1.65435	0	0	2.85346	2.54233	0	2.42073	0	0	2.5	2.5	0	2.5	low
1239	mtr-MIR2612-p3_2		TATTTGATAGTGTCAACTAGT	up	1.73931	0.798517	0.607352	0.951153	1.65435	0	0	2.85346	2.54233	0	2.42073	0	0	2.5	2.5	0	2.5	low
1240	mtr-MIR2586a-p3_2ss9TC17CT		AGCACGGACACGGACATGGACACC	up	1.54562	0.628185	0.607678	2.2365	3.45677	0	3.28534	3.42415	0	4.07641	6.2939	0	3.5	3	0	4	6.5	low
1241	mtr-MIR2586a-p5_2ss9TC17CT		AGCACGGACACGGACATGGACACC	up	1.54562	0.628185	0.607678	2.2365	3.45677	0	3.28534	3.42415	0	4.07641	6.2939	0	3.5	3	0	4	6.5	low
1242	PC-5p-39338_130		TACTCCAGAGATCCACCAATC	up	2.0751	1.05318	0.608038	4.22003	8.75697	2.93189	5.16267	4.56554	0	2.54776	23.7232	2.5	5.5	4	0	2.5	24.5	middle
1243	mtr-miR5561-3p_L+3		AGTGTCTATCTCTCTCTAAATGGA	down	0.807812	-0.307908	0.610895	7.38755	5.96776	5.86378	11.7333	4.56554	4.06772	5.60506	8.23049	5	12.5	4	4	5.5	8.5	middle
1244	PC-3p-40463_127		TTAGCCCATGGAGAGGTCCCTGCC	up	2.60694	1.38236	0.611306	2.54097	6.62416	7.62292	0	0	0	19.8725	0	6.5	0	0	0	19.5	0	middle
1245	vvi-miR167c_1ss19CT		TGAAGCTGCCAGCATGATTTC	up	1.74863	0.806228	0.611375	1.14138	1.99586	0	0	3.42415	0	3.56686	2.42073	0	0	3	0	3.5	2.5	low
1246	PC-3p-87920_56		TCTTCGACTCTACACTCAATT	down	0.48619	-1.04041	0.611713	13.6246	6.62416	34.5963	0	6.27761	0	19.8725	0	29.5	0	5.5	0	19.5	0	middle
1247	lja-miR1511-3p_R-3		AACCAGGCTCTGATACCATGA	up	1.09792	0.134777	0.613836	4987.77	5476.19	5699.6	4879.66	4384.06	6229.21	3919.98	6279.38	4860	5198.5	3841	6125.5	3846.5	6485	high
1248	hpe-miR162a_R+2		TCGATAAACCTCTGCATCCAGTT	up	1.23734	0.307245	0.61488	41.968	51.9288	37.5282	34.7307	53.6451	20.3386	75.4136	60.0341	32	37	47	20	74	62	middle
1249	PC-3p-212629_16		TGTTTATGTTACGTCACGTGGAGC	down	0.389796	-1.35921	0.615109	3.04369	1.18642	0	0	9.13107	3.55926	0	0	0	0	8	3.5	0	0	low
1250	PC-5p-39055_131		ATCCTTGTCAATCATGTTAGC	up	1.56946	0.65027	0.615754	5.96871	9.36766	7.03654	5.16267	5.70692	0	19.8725	8.23049	6	5.5	5	0	19.5	8.5	middle
1251	ptc-MIR166h-p5_1ss2AG		GGATGCTGTCTGATTCGAGA	up	1.42494	0.510898	0.617024	6.02582	8.58642	5.86378	4.224	7.98969	12.2032	0	13.5561	5	4.5	7	12	0	14	middle
1252	mtr-miR319a-3p		TTGGACTGAAGGGAGCTCCC	down	0.790132	-0.339834	0.617119	618.453	488.66	867.957	346.744	640.659	469.653	177.426	818.901	740.1	369.4	561.3	461.833	174.1	845.717	middle
1253	gma-miR319a		TTGGACTGAAGGGAGCTCCC	down	0.790132	-0.339834	0.617119	618.453	488.66	867.957	346.744	640.659	469.653	177.426	818.901	740.1	369.4	561.3	461.833	174.1	845.717	middle
1254	mtr-MIR5285c-p5_2ss8TC17GA		TCTTGGTCACGGGAAGAGATT	up	1.81861	0.862836	0.617802	1.56445	2.84511	0	4.69334	0	0	6.11461	2.42073	0	5	0	0	6	2.5	middle
1255	PC-3p-10505_445		TTGTGGAACATAGAAGCACGTG	up	1.4206	0.506497	0.618169	60.1966	85.5151	0	109.824	70.7658	153.557	45.8596	57.1293	0	117	62	151	45	59	middle
1256	PC-3p-178199_21		AGGGATAATGCAAATGAGAGGAAC	up	1.67264	0.74213	0.618318	1.95498	3.26998	3.51827	2.34667	0	0	2.54776	7.26219	3	2.5	0	0	2.5	7.5	low
1257	mtr-miR2600b_1ss11GA		AAGCATTGTGACATTGTGATTGGT	up	1.77684	0.829316	0.619376	1.408	2.5018	0	4.224	0	5.08465	0	2.42073	0	4.5	0	5	0	2.5	low
1258	PC-5p-9778_474		TGGTTCGACAAAAACAAGGGA	down	0.824989	-0.277554	0.619449	24.4902	20.2041	36.9418	21.12	15.4087	12.7116	28.5349	19.3659	31.5	22.5	13.5	12.5	28	20	middle
1259	ghr-miR172_R+1		AGAATCCTGATGATGCTGCAGT	down	0.724843	-0.464259	0.621983	11.0438	8.005	10.5548	11.7333	10.8431	6.10158	0	17.9134	9	12.5	9.5	6	0	18.5	middle
1260	PC-3p-206381_16		ACTGGATGTTCCGAATACTAT	down	0.586676	-0.769363	0.622819	3.46675	2.03386	0	4.69334	5.70692	6.10158	0	0	0	5	5	6	0	0	low
1261	PC-5p-46541_111		CTTGGGATAAAACTAAATCTGC	down	0.650322	-0.620775	0.624527	5.73703	3.73092	0	7.50934	9.70177	8.13545	3.05731	0	0	8	8.5	8	3	0	middle
1262	PC-5p-215842_15		TAGTCTCTTATGTCAACTTATTGA	up	1.69464	0.760975	0.625028	0.977297	1.65616	2.93189	0	0	0	2.54776	2.42073	2.5	0	0	0	2.5	2.5	low
1263	gma-miR156a_1ss20CT		TGACAGAAGAGAGTGAGCAT	down	0.838345	-0.254384	0.625158	157.747	132.247	166.531	160.043	146.668	87.9645	221.145	87.6305	142	170.5	128.5	86.5	217	90.5	middle
1264	mtr-miR156i-3p_L-1		GCTCACTTCTCTTTCTGTCATC	up	1.21282	0.278369	0.627072	44.6368	54.1366	45.7375	35.6694	52.5037	21.3555	71.3371	69.7171	39	38	46	21	70	72	middle
1265	mtr-miR2118		TTACCGATTCCACCCATTCCTA	up	1.12923	0.175339	0.628794	20009.9	22595.8	16382.2	19032.4	24615.1	27404.2	14225.6	26157.5	13969	20276	21566	26948	13959	27014	high
1266	mtr-MIR2599-p5_2ss13TC20AG		AAGGAATCTACTCTATTCAGCACA	up	1.6997	0.765277	0.629937	2.34551	3.98666	7.03654	0	0	7.11852	0	4.84146	6	0	0	7	0	5	low
1267	nta-MIR6159-p5_2ss5AG17TA_2		CATTGGCATAGAATTCACGCAC	down	0.58541	-0.77248	0.630289	3.48167	2.0382	6.45016	0	3.99484	0	6.11461	0	5.5	0	3.5	0	6	0	low
1268	nta-MIR6159-p5_2ss5AG17TA_1		CATTGGCATAGAATTCACGCA	down	0.58541	-0.77248	0.630289	3.48167	2.0382	6.45016	0	3.99484	0	6.11461	0	5.5	0	3.5	0	6	0	low
1269	lja-miR1511-3p_R-2		AACCAGGCTCTGATACCATGAA	down	0.773881	-0.369816	0.630843	54.3415	42.0539	25.8006	80.7254	56.4985	26.9487	76.9422	22.2707	22	86	49.5	26.5	75.5	23	middle
1270	PC-3p-144495_29		TGAACACAAGAAAGCCAAAGCCAC	up	2.40698	1.26722	0.631052	1.87733	4.5187	0	5.632	0	0	0	13.5561	0	6	0	0	0	14	middle
1271	mtr-MIR2592bj-p5		AAGTGTCAAGGAATGGACCTCATT	up	1.75961	0.815253	0.632266	2.2365	3.93535	0	3.28534	3.42415	0	2.12313	9.68293	0	3.5	3	0	2.08333	10	low
1272	lja-MIR5287d-p5_2ss18CG20AG		TTCAATAAATGATGTATGTGGTCT	up	1.26948	0.344242	0.632799	23.9697	30.4291	14.0731	28.16	29.676	13.2201	50.9551	27.1122	12	30	26	13	50	28	middle
1273	PC-3p-39874_129		TTGCCTACATTTGAGACCCGAGGG	down	0.71258	-0.488876	0.633459	10.2989	7.33879	0	15.488	15.4087	10.6778	4.07641	7.26219	0	16.5	13.5	10.5	4	7.5	middle
1274	mtr-miR2592ab_L+2		AACAACAGGACTCAAGCATTTCGC	down	0.708659	-0.496837	0.634383	6.74122	4.77722	3.4694	6.10134	10.6529	0	10.7006	3.6311	2.95833	6.5	9.33333	0	10.5	3.75	middle
1275	PC-5p-82336_61		AAGCATAGAGTACCTGGTTCGATT	up	1.46198	0.547923	0.635078	3.0525	4.4627	0	5.16267	3.99484	6.61005	0	6.77805	0	5.5	3.5	6.5	0	7	low
1276	PC-5p-26368_190		AGCCAATGTGAATGACAGAATC	up	1.31895	0.399392	0.636513	23.3629	30.8145	18.1777	15.9573	35.9536	55.4227	23.9489	13.072	15.5	17	31.5	54.5	23.5	13.5	middle
1277	mtr-miR2634		TTTATTCTCAGTTTGTTGCTC	up	1.10302	0.141461	0.636886	12.7555	14.0695	12.9003	9.38667	15.9794	16.2709	15.2865	10.6512	11	10	14	16	15	11	middle
1278	PC-5p-16744_291		TTGACGAATGCATGAAGTTTG	up	1.1881	0.248659	0.636977	15.0185	17.8435	23.4551	13.6107	7.98969	12.2032	22.9298	18.3976	20	14.5	7	12	22.5	19	middle
1279	mtr-MIR5289a-p5_2ss20GA23TC		AGTTAACTGCCGAATTATGAAACC	down	0.935469	-0.0962383	0.637539	276.999	259.124	223.996	302.251	304.75	235.928	236.432	305.012	191	322	267	232	232	315	middle
1280	ath-miR159c_R+2_2ss19CT20CA		TTTGGATTGAAGGGAGCTTATTT	down	0.759182	-0.397482	0.63875	7.43944	5.64789	4.10465	10.7947	7.419	0	9.68147	7.26219	3.5	11.5	6.5	0	9.5	7.5	middle
1281	PC-5p-119698_38		TTGGTATGTTGATGGGGTGCC	up	1.70463	0.769462	0.639	1.36822	2.33231	4.10465	0	0	4.57619	0	2.42073	3.5	0	0	4.5	0	2.5	low
1282	PC-3p-18980_259		ACGTGTCGTGATCTGCCATTGCCG	down	0.687913	-0.539702	0.640802	52.4275	36.0656	21.1096	88.2347	47.9381	87.456	8.15282	12.5878	18	94	42	86	8	13	middle
1283	PC-5p-84884_59		TTTCATCACGTCAGCAGAATCTGC	up	1.47231	0.558077	0.640995	3.27652	4.82404	0	4.69334	5.13623	0	8.66237	5.80976	0	5	4.5	0	8.5	6	low
1284	mtr-miR5204		GCTGGAAGGTTTTGTAGGAAC	down	0.433564	-1.20568	0.642493	3.90919	1.69488	11.7276	0	0	5.08465	0	0	10	0	0	5	0	0	middle
1285	mtr-MIR5252-p5_2ss8CA19CT		TTGAGAGATCACTGAAGTTTG	down	0.434276	-1.20332	0.642946	2.34667	1.0191	0	7.04	0	0	3.05731	0	0	7.5	0	0	3	0	low
1286	mtr-miR1510a-3p_1ss1CA		AGGAGGATTAGGTAAAACAAC	up	1.06709	0.0936874	0.643574	399.771	426.594	446.82	326.187	426.307	360.502	424.966	494.313	381	347.5	373.5	354.5	417	510.5	middle
1287	mtr-miR167a_1ss20TC		TGAAGCTGCCAGCATGATCCA	down	0.687341	-0.540901	0.64391	8.88656	6.1081	15.2458	0	11.4138	9.15238	9.17192	0	13	0	10	9	9	0	middle
1288	mtr-miR171a		TGATTGAGTCGTGCCAATATC	down	0.87746	-0.188594	0.644949	294.92	258.781	401.083	291.925	191.753	233.894	334.265	208.183	342	311	168	230	328	215	middle
1289	PC-3p-138852_31		TGACCAGAAGCCATGTATTGTG	up	2.27995	1.189	0.645705	1.56445	3.56686	0	4.69334	0	0	10.7006	0	0	5	0	0	10.5	0	middle
1290	PC-3p-207145_16		AAAATGTTTTGATTGGTCGTGTGT	up	2.26943	1.18233	0.647003	0.782223	1.7752	0	2.34667	0	0	0	5.32561	0	2.5	0	0	0	5.5	low
1291	mtr-MIR5256-p5_2ss13AG21TG		TTATGTAAGATTGAAATGGTGG	up	1.26728	0.341739	0.647257	9.62686	12.2	9.96843	15.488	3.42415	6.10158	19.3629	11.1354	8.5	16.5	3	6	19	11.5	middle
1292	mtr-miR482-5p_L+2R-2		TAGGCATGGGATAGTAGGGAA	up	1.09744	0.134141	0.648628	608.43	667.715	625.079	525.654	674.558	491.178	650.187	861.78	533	560	591	483	638	890	high
1293	mtr-miR398b		TGTGTTCTCAGGTCGCCCCTG	down	0.711309	-0.491451	0.650271	39.9728	28.433	79.7474	33.3227	6.84831	14.237	36.6877	34.3744	68	35.5	6	14	36	35.5	middle
1294	PC-5p-27575_183		TATGCAATTAGGTACATCAAT	up	1.29067	0.368115	0.650431	16.5826	21.4026	16.4186	4.224	29.1053	11.1862	34.1399	18.8817	14	4.5	25.5	11	33.5	19.5	middle
1295	PC-5p-101821_47		CAGCGGTTGGTACAATGCAATT	up	1.53454	0.617807	0.650919	2.93189	4.49911	8.79567	0	0	3.05079	5.60506	4.84146	7.5	0	0	3	5.5	5	low
1296	gma-miR166i-5p_R+1_1ss5TC		GGAACGTCGTCTGGTTCGAGA	up	1.241	0.311498	0.651067	252.073	312.822	305.503	167.083	283.634	204.912	535.538	198.016	260.5	178	248.5	201.5	525.5	204.5	middle
1299	PC-3p-206119_17		GATCGAAACCAGGCTCTGATACCA	up	1.63502	0.709306	0.651117	2.28277	3.73236	0	0	6.84831	6.10158	5.09551	0	0	0	6	6	5	0	low
1297	mtr-MIR2652l-p3_1ss9CT		ATTTTATGTAGGGTGCTGGAAACC	up	1.63502	0.709306	0.651117	1.14138	1.86618	0	0	3.42415	3.05079	2.54776	0	0	0	3	3	2.5	0	low
1298	mtr-MIR2652l-p5_1ss9CT		ATTTTATGTAGGGTGCTGGAAACC	up	1.63502	0.709306	0.651117	1.14138	1.86618	0	0	3.42415	3.05079	2.54776	0	0	0	3	3	2.5	0	low
1300	PC-5p-3505_1122		TATAATCACTTTCATCGGCATC	up	1.20247	0.266002	0.651928	62.0743	74.6426	71.5381	66.176	48.5088	41.6942	62.1652	120.068	61	70.5	42.5	41	61	124	middle
1301	PC-5p-160517_25		TGACCAAATCAACGCTGACGTGGA	up	1.6268	0.702038	0.653222	1.25156	2.03603	0	3.75467	0	3.05079	3.05731	0	0	4	0	3	3	0	low
1302	mtr-MIR2592ao-p3_1ss14TA		ACAATTGTCTTACACTGGATG	up	1.42676	0.512747	0.655599	4.28114	6.10817	9.32341	3.52	0	5.84735	10.8267	1.6505	7.95	3.75	0	5.75	10.6237	1.70455	middle
1303	mtr-MIR2592bf-p3_1ss14TA		ACAATTGTCTTACACTGGATG	up	1.42676	0.512747	0.655599	4.28114	6.10817	9.32341	3.52	0	5.84735	10.8267	1.6505	7.95	3.75	0	5.75	10.6237	1.70455	middle
1304	mtr-MIR5294b-p5		CTATTTAAACGTCATCCCATCAGA	down	0.704768	-0.504779	0.656123	7.06459	4.9789	2.34551	13.1413	5.70692	4.74568	10.191	0	2	14	5	4.66667	10	0	middle
1305	mtr-miR5558-3p_1ss14AG		TAGATTTAGAATTGGAAAAGC	down	0.862884	-0.212762	0.657472	154.937	133.693	106.721	122.965	235.125	145.93	145.732	109.417	91	131	206	143.5	143	113	middle
1306	mtr-MIR5292a-p5		CAAGTCCTTTTAGTTTTTGAATC	down	0.858343	-0.220374	0.657514	64.2038	55.1089	43.392	72.7467	76.4727	84.4053	49.936	30.9854	37	77.5	67	83	49	32	middle
1307	PC-5p-12736_375		TATGTAGCACTGTTTTTCTGA	up	1.20549	0.269624	0.659272	41.7242	50.2983	28.1462	42.24	54.7864	21.3555	54.0124	75.5268	24	45	48	21	53	78	middle
1308	mtr-MIR2632c-p5_1ss9TG		TCAGGGACGAAAATTCAAATGACC	up	1.14492	0.195249	0.660956	106.648	122.104	99.6843	116.395	103.866	86.4391	97.8338	182.039	85	124	91	85	96	188	middle
1309	PC-3p-39142_131		GATCATGGTGGCAGTTTCACC	up	1.30222	0.380971	0.663135	9.7838	12.7406	18.1777	3.75467	7.419	21.864	7.64327	8.71463	15.5	4	6.5	21.5	7.5	9	middle
1310	gma-miR319d_L+1		TTGGACTGAAGGGGAGCTCCTTC	up	1.17941	0.238068	0.66325	5.81468	6.8579	3.51827	4.224	9.70177	6.10158	8.66237	5.80976	3	4.5	8.5	6	8.5	6	low
1311	gma-MIR156n-p5		ACAGAAGAGAGTGAGCACAAA	down	0.696353	-0.52211	0.664363	4.25305	2.96162	7.62292	0	5.13623	3.55926	0	5.32561	6.5	0	4.5	3.5	0	5.5	middle
1312	PC-5p-3172_1210		TGTTGGTGGAAATAGCTCATTC	down	0.889254	-0.169332	0.666208	140.587	125.017	120.208	176	125.552	137.794	165.604	71.6537	102.5	187.5	110	135.5	162.5	74	middle
1313	mtr-MIR2648-p5_2ss11AG17TA_2		CAATGGGAATGACAGAATCAC	down	0.759988	-0.395952	0.666932	34.3652	26.1171	31.6644	28.6293	42.8019	55.9312	22.4202	0	27	30.5	37.5	55	22	0	middle
1314	mtr-MIR2648-p5_2ss11AG17TA_1		CAATGGGAATGACAGAATCA	down	0.759988	-0.395952	0.666932	34.3652	26.1171	31.6644	28.6293	42.8019	55.9312	22.4202	0	27	30.5	37.5	55	22	0	middle
1315	mtr-miR5294a_L-1R+1		CTAAACGGAATGAGGGTAGTCATC	down	0.74143	-0.431617	0.668946	3.59357	2.66438	0	4.69334	6.08738	3.38977	1.6985	2.90488	0	5	5.33333	3.33333	1.66667	3	low
1316	mtr-MIR5279-p3_2ss5TC22CA		ATAGCTATTTAACCGGATTAAATC	down	0.47499	-1.07403	0.66919	5.00622	2.3779	0	15.0187	0	0	7.13371	0	0	16	0	0	7	0	middle
1317	gma-miR166a-3p_1ss21CA		TCGGACCAGGCTTCATTCCCA	up	1.09682	0.133323	0.669197	1261.56	1383.7	1485.3	953.686	1345.69	1208.62	1802.79	1139.68	1266.5	1016	1179	1188.5	1769	1177	high
1318	ptc-miR166a_1ss21CA		TCGGACCAGGCTTCATTCCCA	up	1.09682	0.133323	0.669197	1261.56	1383.7	1485.3	953.686	1345.69	1208.62	1802.79	1139.68	1266.5	1016	1179	1188.5	1769	1177	high
1319	PC-5p-133280_33		TAGAGAAATTTAGTACTAAGTGAT	up	1.32434	0.405273	0.669381	3.81343	5.05027	0	5.16267	6.27761	4.06772	8.66237	2.42073	0	5.5	5.5	4	8.5	2.5	low
1320	PC-3p-112238_42		TGTGAGGTAGTGTTAGGCTCAACC	up	1.40305	0.48857	0.66981	2.11868	2.97262	2.93189	0	3.42415	0	4.07641	4.84146	2.5	0	3	0	4	5	low
1321	PC-3p-126541_35		TGTTTTTGTCGAACTAACATC	up	1.40305	0.48857	0.66981	2.11868	2.97262	2.93189	0	3.42415	0	4.07641	4.84146	2.5	0	3	0	4	5	low
1322	mes-miR396c_R+2		TTCCACAGCTTTCTTGAACTTTC	down	0.842932	-0.246512	0.670612	99.597	83.9535	72.7109	107.947	118.133	45.2534	143.184	63.4232	62	115	103.5	44.5	140.5	65.5	middle
1323	PC-5p-58292_88		ATCATGAGAAAATCTAGAATG	up	2.08111	1.05735	0.672797	1.95459	4.06772	5.86378	0	0	12.2032	0	0	5	0	0	12	0	0	middle
1324	mtr-miR5225b		TCGCAGGAGAGATGACACCTTC	down	0.761992	-0.392153	0.674022	8.24219	6.28048	8.79567	10.7947	5.13623	5.59312	13.2483	0	7.5	11.5	4.5	5.5	13	0	middle
1325	mtr-MIR169l-p3_1ss11TC		CTTGGCTATACTGGACTTTCT	up	1.34676	0.429498	0.674448	10.2498	13.8041	5.86378	16.896	7.98969	7.11852	27.5158	6.77805	5	18	7	7	27	7	middle
1326	PC-5p-130409_34		ACATTGTGGTTGGTGACATTGATC	down	0.69841	-0.517853	0.676025	5.34409	3.73236	0	10.3253	5.70692	6.10158	5.09551	0	0	11	5	6	5	0	middle
1327	ath-miR8175_L+5		GGTTCGATCCCCGGCAACGGCGCCA	down	0.711536	-0.490991	0.677029	3.27052	2.3271	4.10465	0	5.70692	0	4.07641	2.90488	3.5	0	5	0	4	3	low
1328	mtr-MIR5037a-p3		GTGGAAGTGCTTTTTGGGTTTC	down	0.769043	-0.378865	0.679786	5.31999	4.0913	5.86378	6.10134	3.99484	3.55926	0	8.71463	5	6.5	3.5	3.5	0	9	low
1329	PC-5p-80670_62		CATTTGTGAGAGAGATGGACA	down	0.712986	-0.488055	0.679979	3.27575	2.33556	4.69103	0	5.13623	0	4.58596	2.42073	4	0	4.5	0	4.5	2.5	low
1330	PC-3p-79346_63		ATTGATTGCGTCAATGCGGGAACC	up	1.33042	0.411877	0.680514	3.10121	4.12589	6.45016	0	2.85346	2.54233	3.05731	6.77805	5.5	0	2.5	2.5	3	7	low
1331	PC-3p-79153_63		AAGGCGTGCGAGAAACTCATAGGG	down	0.601338	-0.733752	0.681096	4.51926	2.71761	0	3.28534	10.2725	0	8.15282	0	0	3.5	9	0	8	0	middle
1332	mtr-miR319b-5p_L+1R-1		AGAGCTTTCTTTAGTCCACTC	up	1.39786	0.483221	0.682501	4.23736	5.92324	5.86378	0	6.84831	7.11852	0	10.6512	5	0	6	7	0	11	middle
1333	PC-3p-154997_26		TTACATGCATTCTGGTTGACC	down	0.639765	-0.644387	0.68315	4.24782	2.71761	7.03654	0	5.70692	0	8.15282	0	6	0	5	0	8	0	low
1334	mtr-MIR169g-p5		CGGCAAGTCGTCTCTGGCTAC	up	2.00516	1.00372	0.684749	2.73643	5.48699	8.2093	0	0	0	0	16.461	7	0	0	0	0	17	middle
1335	PC-5p-100411_48		TCTTTTCATTTCTAAAATAGGC	down	0.74441	-0.425831	0.68485	4.02496	2.99622	0	7.50934	4.56554	2.54233	3.05731	3.38902	0	8	4	2.5	3	3.5	low
1336	mtr-MIR395j-p5_1ss21AC		AGTTCCTCTGAATGCTTCAAC	down	0.780301	-0.357897	0.687908	19.0024	14.8276	4.10465	27.2213	25.6811	14.237	4.58596	25.6598	3.5	29	22.5	14	4.5	26.5	middle
1337	mtr-MIR395b-p5_1ss21AC		AGTTCCTCTGAATGCTTCAAC	down	0.780301	-0.357897	0.687908	19.0024	14.8276	4.10465	27.2213	25.6811	14.237	4.58596	25.6598	3.5	29	22.5	14	4.5	26.5	middle
1338	PC-3p-3111_1226		TGAGGTTGGTGAATCTTTGGA	up	1.3236	0.404462	0.689792	44.8282	59.3345	48.6694	41.3014	44.514	24.4063	31.5922	122.005	41.5	44	39	24	31	126	middle
1339	PC-3p-24519_204		GAGGTTGGTGAATCTTTGGAG	up	1.40578	0.491373	0.690419	8.60097	12.0911	11.1412	6.10134	8.56038	5.08465	4.07641	27.1122	9.5	6.5	7.5	5	4	28	middle
1340	PC-3p-176004_21		CGTGGCACATTCTAATTGGACAAT	down	0.50901	-0.974235	0.691553	1.90231	0.968293	0	0	5.70692	0	0	2.90488	0	0	5	0	0	3	low
1341	ath-miR159b-3p_1ss19CT		TTTGGATTGAAGGGAGCTTTT	up	1.14522	0.195624	0.691749	6.88366	7.8833	10.5548	6.10134	3.99484	9.15238	9.17192	5.32561	9	6.5	3.5	9	9	5.5	middle
1342	PC-3p-50370_102		AATGTCACCAATGTCACCCAACTC	down	0.877853	-0.187948	0.692278	13.7625	12.0814	8.2093	15.9573	17.1208	17.2878	11.2101	7.74634	7	17	15	17	11	8	middle
1343	PC-5p-697_4233		CTCATGGGCAAAGAGAGCAAC	down	0.934587	-0.0975991	0.693285	687.726	642.739	768.155	520.022	775	705.75	514.647	707.822	655	554	679	694	505	731	high
1344	PC-3p-20845_237		TGAGGCTGCTTTAAAGAAAGT	up	1.27249	0.347654	0.695446	8.66767	11.0295	5.2774	15.0187	5.70692	4.57619	8.66237	19.85	4.5	16	5	4.5	8.5	20.5	middle
1345	mtr-MIR2603-p3_2ss4AG22CA		AATGTTTTACAAAGTGCAGGGACC	up	1.24347	0.314373	0.69603	4.49914	5.59455	2.93189	6.57067	3.99484	3.55926	3.05731	10.1671	2.5	7	3.5	3.5	3	10.5	middle
1346	gma-MIR156i-p3_1ss3TC		GCCCTCTATACTTCTGTCATC	down	0.761845	-0.39243	0.697631	70.7329	53.8876	124.312	0	87.8866	49.3211	39.2354	73.1061	106	0	77	48.5	38.5	75.5	middle
1347	gma-MIR156d-p3_1ss3TC_1		GCCCTCTATACTTCTGTCATC	down	0.761845	-0.39243	0.697631	70.7329	53.8876	124.312	0	87.8866	49.3211	39.2354	73.1061	106	0	77	48.5	38.5	75.5	middle
1348	PC-3p-138276_31		TTAACGAGGCAACATATGTTCC	up	1.90768	0.931822	0.701633	0.977297	1.86437	2.93189	0	0	5.59312	0	0	2.5	0	0	5.5	0	0	low
1349	PC-3p-259021_11		TGACGTCGTCACCAATAATGA	up	1.90768	0.931822	0.701633	0.977297	1.86437	2.93189	0	0	5.59312	0	0	2.5	0	0	5.5	0	0	low
1350	PC-5p-91768_54		ATTAAATCTGAACCACACATTGTC	up	1.12137	0.165266	0.703773	3.24758	3.64175	2.93189	2.816	3.99484	2.54233	3.05731	5.32561	2.5	3	3.5	2.5	3	5.5	low
1351	gma-miR1509a_R-1_1ss18GA		TTAATCAAGGAAATCACAGTC	up	1.10292	0.141334	0.704424	4047.4	4463.97	3096.08	4928	4118.11	3219.6	6106.46	4065.86	2640	5250	3608	3166	5992	4199	high
1352	PC-3p-90358_54		TCGACACTCTAGACTCTAACAAA	up	1.3594	0.44297	0.704573	2.93266	3.98666	4.10465	4.69334	0	7.11852	0	4.84146	3.5	5	0	7	0	5	low
1353	mtr-MIR166d-p5_1ss18AG		GGAATGTTGCCTGGCTCGAGG	up	1.51232	0.596766	0.705286	0.730074	1.10411	0	2.19022	0	0	1.6985	1.61382	0	2.33333	0	0	1.66667	1.66667	low
1354	mtr-MIR5279-p5		TGAATCGGAACCACTCGGATGACT	down	0.849438	-0.235419	0.705535	46.6967	39.666	38.701	43.1787	58.2106	66.1005	12.2292	40.6683	33	46	51	65	12	42	middle
1355	PC-5p-13717_350		GCCAATGGTAATGACAGAATC	up	1.31988	0.400405	0.705614	36.624	48.3392	38.1146	11.264	60.4934	97.1169	28.5349	19.3659	32.5	12	53	95.5	28	20	middle
1356	mtr-MIR2592al-p3_1		CCTCGCGTTCATGTTTTTCCTT	down	0.841887	-0.248301	0.706191	27.8507	23.4471	14.0731	32.384	37.095	25.4233	36.6877	8.23049	12	34.5	32.5	25	36	8.5	middle
1357	mtr-MIR2592al-p3_2		CTCGCGTTCATGTTTTTCCTT	down	0.841887	-0.248301	0.706191	27.8507	23.4471	14.0731	32.384	37.095	25.4233	36.6877	8.23049	12	34.5	32.5	25	36	8.5	middle
1358	mtr-MIR2592al-p5		CCTCGCGTTCATGTTTTTCCTT	down	0.841887	-0.248301	0.706191	27.8507	23.4471	14.0731	32.384	37.095	25.4233	36.6877	8.23049	12	34.5	32.5	25	36	8.5	middle
1359	mtr-MIR2610a-p5_2ss9TA20GT		TTGAGACTAGTATGGCTTCTTT	up	1.45389	0.539921	0.707333	8.07006	11.733	7.03654	10.3253	6.84831	7.11852	0	28.0805	6	11	6	7	0	29	middle
1360	gma-miR156c_R+1_1ss17AG		TTGACAGAAGATAGAGGGCACA	down	0.535719	-0.900451	0.709313	1.90231	1.0191	0	0	5.70692	0	3.05731	0	0	0	5	0	3	0	low
1361	PC-5p-154891_26		CTAAGAGCACATGTTAAAGAACCC	down	0.563972	-0.826305	0.710732	3.23392	1.82384	0	0	9.70177	3.05079	0	2.42073	0	0	8.5	3	0	2.5	low
1362	PC-3p-5526_779		ATGGGCCCCATCGATCACATCAAT	down	0.929682	-0.105191	0.711031	98.3208	91.407	99.6843	121.088	74.19	88.473	74.3945	111.354	85	129	65	87	73	115	middle
1364	PC-5p-223725_14		AGGATAAAATTCATGTAGGTCTCA	up	1.85681	0.892826	0.711209	1.56445	2.90488	0	4.69334	0	0	0	8.71463	0	5	0	0	0	9	low
1363	PC-3p-224085_14		AACAAAGGCACCAAAGTCAAAGGC	up	1.85681	0.892826	0.711209	0.782223	1.45244	0	2.34667	0	0	0	4.35732	0	2.5	0	0	0	4.5	low
1365	PC-5p-24069_208		CTGTAGCTCCGCCTCTATAGTATA	down	0.868669	-0.203122	0.711765	56.0328	48.6739	43.9784	64.768	59.352	24.9148	40.2545	80.8524	37.5	69	52	24.5	39.5	83.5	middle
1366	mtr-miR2629a_L+3		CGAAGTTTTCCTCGGTAGTTAACT	down	0.956307	-0.0644541	0.7125	29.6244	28.33	28.1462	25.344	35.3829	27.4571	27.5158	30.0171	24	27	31	27	27	31	middle
1367	PC-3p-29831_170		TCAAAAGAATGTAAGGGGTTAG	up	1.05987	0.0838837	0.71298	9.14387	9.69129	7.03654	11.264	9.13107	10.6778	9.68147	8.71463	6	12	8	10.5	9.5	9	middle
1368	mtr-miR2666_1ss1CT		TGAAAGTGAGGATATCAAGGA	down	0.918503	-0.122644	0.713117	106.736	98.0373	86.784	113.579	119.845	124.066	109.044	61.0024	74	121	105	122	107	63	middle
1369	csi-miR396a-5p_R+1_1ss21GA		TTCCACAGCTTTCTTGAACTAT	up	1.10627	0.145708	0.713518	10.6887	11.8246	8.2093	8.448	15.4087	8.64391	13.7579	13.072	7	9	13.5	8.5	13.5	13.5	middle
1370	PC-3p-234570_13		ACCATCGTCCGAGATGACCATC	down	0.543113	-0.880677	0.714253	1.56368	0.849252	4.69103	0	0	0	2.54776	0	4	0	0	0	2.5	0	low
1371	gma-miR4415a-3p_1ss18AT		TTGATTCTCATCACAACTTGG	down	0.744084	-0.426463	0.714948	15.5289	11.5548	32.8372	10.3253	3.42415	5.59312	19.8725	9.19878	28	11	3	5.5	19.5	9.5	middle
1372	PC-3p-46671_110		GACTATTTGGACTAGCGAAGTGCA	up	1.16072	0.215015	0.715124	6.44927	7.48577	3.51827	11.264	4.56554	7.11852	6.62416	8.71463	3	12	4	7	6.5	9	middle
1373	cme-MIR166i-p3_2ss9GT18CT		TCGGACCATGCTTCATTTT	up	1.22719	0.295363	0.715471	37.0995	45.5282	64.5016	0	46.7968	38.6434	61.1461	36.7951	55	0	41	38	60	38	middle
1374	mtr-miR2651		TTTGATTGGTATGCCTGCATT	up	1.18676	0.247024	0.71661	57.9699	68.7962	90.3022	35.6694	47.9381	112.879	49.936	43.5732	77	38	42	111	49	45	middle
1375	gma-miR166a-5p_2ss15CT21GA		GGAATGTTGTCTGGTTCGAGA	up	1.2792	0.355244	0.716964	12.2487	15.6686	3.51827	4.69334	28.5346	13.2201	17.3247	16.461	3	5	25	13	17	17	middle
1376	PC-5p-29023_175		CAGTACATGGTTCTGGCCACC	up	1.30356	0.382462	0.718288	9.88951	12.8916	12.9003	12.2027	4.56554	23.8979	14.777	0	11	13	4	23.5	14.5	0	middle
1377	cpa-miR159a_R+1_1ss9GT		TTTGGATTTAAGGGAGCTCTAG	down	0.753999	-0.407365	0.719491	5.39966	4.07134	8.2093	0	7.98969	7.11852	5.09551	0	7	0	7	7	5	0	low
1378	PC-3p-126902_35		TGATTTGCAGATTCCTTTTTA	down	0.757785	-0.40014	0.721041	2.61977	1.98522	4.10465	3.75467	0	3.05079	0	2.90488	3.5	4	0	3	0	3	low
1379	mtr-miR1510a-5p_L-1R-2		TGTCTTACCCATTCCTCC	up	1.14631	0.196995	0.721868	17.5023	20.063	12.3139	17.3653	22.8277	8.64391	23.9489	27.5963	10.5	18.5	20	8.5	23.5	28.5	middle
1380	PC-5p-140848_30		ATCAAAACATTCTGAATTGCCACG	down	0.749965	-0.415105	0.722063	2.86227	2.14661	0	5.16267	3.42415	3.05079	0	3.38902	0	5.5	3	3	0	3.5	low
1381	mtr-miR1510a-3p_L+3_1ss4CA		GATAGGAGGATTAGGTAAAACAAC	up	1.1016	0.1396	0.722119	18.8114	20.7226	18.7641	21.12	16.5501	12.7116	20.8916	28.5646	16	22.5	14.5	12.5	20.5	29.5	middle
1382	PC-3p-181956_20		TTTCTTTGACTCGCTTTTGCT	down	0.558041	-0.841558	0.724252	1.52185	0.849252	0	0	4.56554	0	2.54776	0	0	0	4	0	2.5	0	low
1383	mtr-miR2592bm-5p		CTCGGCATTCATGTTTTTCCTT	up	1.17877	0.237283	0.724952	4.32161	5.09418	2.73643	4.90193	5.32646	8.70041	3.62347	2.95867	2.33333	5.22222	4.66667	8.55556	3.55556	3.05556	low
1384	mtr-MIR2669a-p5_2ss1TC17CT		CATGAGAATGACTTTTTTGGTGAA	up	1.28	0.356142	0.725145	9.85485	12.6142	7.03654	22.528	0	9.15238	12.2292	16.461	6	24	0	9	12	17	middle
1385	ath-miR8175_L+2_1ss4AT		TCGTTCCCCGGCAACGGCGCCA	up	1.78193	0.833437	0.726364	0.951153	1.69488	0	0	2.85346	5.08465	0	0	0	0	2.5	5	0	0	low
1386	mtr-MIR2629b-p3_1ss5CT		GGTTTCATAATTCGGCAGTTAACT	up	1.1161	0.158469	0.73	16.7631	18.7093	19.9369	20.6507	9.70177	12.7116	25.9871	17.4293	17	22	8.5	12.5	25.5	18	middle
1387	mtr-MIR2629a-p3_1ss5CT		GGTTTCATAATTCGGCAGTTAACT	up	1.1161	0.158469	0.73	16.7631	18.7093	19.9369	20.6507	9.70177	12.7116	25.9871	17.4293	17	22	8.5	12.5	25.5	18	middle
1388	gma-miR167c_R+1		TGAAGCTGCCAGCATGATCTGG	down	0.965891	-0.0500682	0.730203	279.361	269.832	314.299	251.563	272.22	292.368	282.801	234.327	268	268	238.5	287.5	277.5	242	middle
1389	mtr-miR167a_R+1_1ss21AG		TGAAGCTGCCAGCATGATCTGG	down	0.965891	-0.0500682	0.730203	279.361	269.832	314.299	251.563	272.22	292.368	282.801	234.327	268	268	238.5	287.5	277.5	242	middle
1390	PC-5p-121180_37		TTTTTAAATTATGGACTATACAAC	down	0.710221	-0.493661	0.730642	7.63654	5.42363	5.86378	5.632	11.4138	16.2709	0	0	5	6	10	16	0	0	middle
1391	gma-miR408a-3p_L-1R+2		TGCACTGCCTCTTCCCTGGCTC	down	0.57309	-0.803168	0.734355	2.816	1.61382	0	8.448	0	0	0	4.84146	0	9	0	0	0	5	low
1392	PC-5p-207577_16		AGGATTTGAACATTCTATTTGGTC	down	0.574777	-0.798925	0.735489	2.65956	1.52865	0	7.97867	0	0	4.58596	0	0	8.5	0	0	4.5	0	low
1393	PC-3p-170031_23		GGGACCTTTTTGAAAACTGAAGCA	up	1.73796	0.797395	0.735899	1.95459	3.39701	5.86378	0	0	0	10.191	0	5	0	0	0	10	0	middle
1394	mtr-miR1507-3p		CCTCGTTCCATACATCATCTAG	down	0.962604	-0.0549854	0.735953	2665.67	2565.98	2455.75	3087.28	2453.98	2396.91	2381.64	2919.4	2094	3289	2150	2357	2337	3015	high
1395	gma-miR172a_1ss21TA		AGAATCTTGATGATGCTGCAA	up	1.48349	0.568996	0.73655	2.97245	4.4096	0	8.91734	0	9.15238	4.07641	0	0	9.5	0	9	4	0	low
1396	PC-5p-61755_83		TTAGGTGGTGGATAAGGGTTA	up	1.27562	0.351202	0.736562	18.7556	23.925	33.4236	13.1413	9.70177	33.5587	38.2163	0	28.5	14	8.5	33	37.5	0	middle
1397	mtr-MIR2586a-p3_2ss2GA18GA		AACACGGATACGGACACAGACACC	down	0.578086	-0.790644	0.737713	1.75913	1.01693	5.2774	0	0	3.05079	0	0	4.5	0	0	3	0	0	low
1398	PC-5p-92811_53		TTAATCAGAGAAAGCACAGTTG	up	1.18387	0.243505	0.738116	7.36548	8.71974	10.5548	4.69334	6.84831	15.254	5.09551	5.80976	9	5	6	15	5	6	middle
1399	PC-5p-211247_16		AACATTGGTCAATGAAGGTGTGCC	up	1.71927	0.781795	0.740104	0.938667	1.61382	0	2.816	0	0	0	4.84146	0	3	0	0	0	5	low
1400	PC-3p-207335_16		GAAGGTTGTCATGAAAGTTGTACC	up	1.71927	0.781795	0.740104	0.938667	1.61382	0	2.816	0	0	0	4.84146	0	3	0	0	0	5	low
1401	PC-5p-14183_340		ACCAAAATACGTGTAAGCTCCCTC	up	1.27507	0.350574	0.741124	20.4149	26.0303	19.3505	25.344	16.5501	14.7455	8.15282	55.1927	16.5	27	14.5	14.5	8	57	middle
1402	PC-5p-31335_162		TAGTCTCTGATGTCAACTTATTGA	up	1.09668	0.133149	0.744054	11.0912	12.1636	13.4867	14.08	5.70692	9.66084	13.7579	13.072	11.5	15	5	9.5	13.5	13.5	middle
1403	PC-5p-174802_22		TGACACTAAATCTGGGCCGCAT	up	1.26909	0.343795	0.744516	5.51265	6.99605	12.3139	4.224	0	3.05079	10.191	7.74634	10.5	4.5	0	3	10	8	middle
1404	PC-5p-223951_14		AATGTTTGGGGTTGGATTTGC	up	1.6967	0.762731	0.745308	1.14138	1.93659	0	0	3.42415	0	0	5.80976	0	0	3	0	0	6	low
1405	PC-3p-148033_28		AAGTGTCCAACGACAGTTAACTGC	down	0.589754	-0.761815	0.74556	2.73643	1.61382	8.2093	0	0	0	0	4.84146	7	0	0	0	0	5	low
1406	mtr-MIR2630s-p3		AATCAATTTTACAAGGACTAAAAC	up	1.09136	0.126127	0.747127	1.99102	2.17292	2.58006	2.02335	1.36966	1.48181	2.84216	2.1948	2.2	2.15556	1.2	1.45714	2.78889	2.26667	low
1407	mtr-miR172d-3p_R+1		AGAATCTTGATGATGCTGCAG	up	1.11512	0.157194	0.747718	898.564	1002	1033.78	894.706	767.2	1536.58	622.332	847.095	881.5	953.167	672.167	1511	610.667	874.833	high
1408	mtr-miR390		AAGCTCAGGAGGGATAGCGCC	down	0.898835	-0.153871	0.749247	1535.45	1380.12	1729.82	1367.64	1508.91	1455.23	622.671	2062.46	1475	1457	1322	1431	611	2130	high
1409	PC-5p-126748_35		TTTTAGTTTTGCTCGTTCCCC	down	0.595243	-0.748448	0.749253	1.71208	1.0191	0	0	5.13623	0	3.05731	0	0	0	4.5	0	3	0	low
1410	mtr-MIR2586a-p5_2ss9CT20CT		ACGGACACTGGACACGACATAGAC	up	1.67629	0.745269	0.750137	1.25156	2.09797	0	3.75467	0	0	0	6.2939	0	4	0	0	0	6.5	low
1411	PC-5p-58708_87		TGAAATTCAAATACGGTGCCTATC	up	1.3508	0.433817	0.75078	9.77374	13.2024	24.6279	4.69334	0	18.3048	0	21.3024	21	5	0	18	0	22	middle
1412	gma-MIR1525-p5_1ss15TC		ACACTTTTTAGTCCCTGTGACATT	up	1.26316	0.33704	0.751354	14.8756	18.7903	5.86378	31.9147	6.84831	19.3217	5.09551	31.9537	5	34	6	19	5	33	middle
1413	mtr-miR5284a		GAGGGACCAAAAGTGGAAGAATCT	up	1.08473	0.117331	0.751642	14.4823	15.7094	8.79567	19.2427	15.4087	15.7624	12.484	18.8817	7.5	20.5	13.5	15.5	12.25	19.5	middle
1414	mtr-miR408-3p		ATGCACTGCCTCTTCCCTGGC	down	0.813219	-0.298284	0.753557	358.89	291.856	710.69	244.992	120.987	162.709	392.354	320.505	606	261	106	160	385	331	middle
1415	mtr-MIR5230-p3_2ss6TG19AG		ATGGTGTAAGATATTGGAGAC	down	0.757445	-0.400787	0.754462	4.65317	3.52452	6.45016	7.50934	0	0	8.15282	2.42073	5.5	8	0	0	8	2.5	low
1416	PC-3p-227251_14		TGGCCAGAGGCCGTGAATCGTA	down	0.603161	-0.729384	0.754581	1.408	0.849252	0	4.224	0	0	2.54776	0	0	4.5	0	0	2.5	0	low
1418	PC-3p-160271_25		ATTTTGATTGGTGTTAACTCAGAA	up	1.6505	0.722901	0.756408	1.56445	2.58211	0	4.69334	0	0	0	7.74634	0	5	0	0	0	8	low
1417	lja-MIR171a-p5_1ss6CA		TATTGAGATATTGGCTTGGTTC	up	1.6505	0.722901	0.756408	0.782223	1.29106	0	2.34667	0	0	0	3.87317	0	2.5	0	0	0	4	low
1419	PC-5p-29043_175		AATGTCTCTGGGCACTCTTTAAGC	down	0.839642	-0.252153	0.756862	27.9447	23.4636	34.0099	44.1174	5.70692	16.2709	17.3247	36.7951	29	47	5	16	17	38	middle
1420	PC-5p-136250_32		TCAACACTCTCACTAACACTCACT	down	0.809647	-0.304635	0.757135	4.34269	3.51605	2.93189	6.10134	3.99484	0	7.64327	2.90488	2.5	6.5	3.5	0	7.5	3	low
1421	mtr-miR5287a_L+1R-1_1ss24AG		TTGCTTATATTAGTGACCGGAGGG	up	1.04707	0.0663548	0.757585	288.338	301.91	260.352	342.144	262.518	263.385	279.234	363.11	222	364.5	230	259	274	375	middle
1422	lja-MIR5287c-p3_1ss12TA		TTGCTTATATTAGTGACCGGAGGG	up	1.04707	0.0663548	0.757585	288.338	301.91	260.352	342.144	262.518	263.385	279.234	363.11	222	364.5	230	259	274	375	middle
1423	PC-3p-4212_966		TCGACACTCCAGACTCTAACAAA	down	0.880939	-0.182886	0.759161	59.5047	52.42	88.5431	22.0587	67.9124	57.9651	39.745	59.55	75.5	23.5	59.5	57	39	61.5	middle
1424	PC-3p-47697_108		CTGTGTTTTTCTTGATTAAAGT	down	0.83142	-0.266351	0.762026	8.36891	6.95807	6.45016	6.10134	12.5552	8.13545	12.7388	0	5.5	6.5	11	8	12.5	0	middle
1425	bra-miR168a-5p_L+1		CTCGCTTGGTGCAGGTCGGGAA	up	1.3288	0.410128	0.764308	2.39294	3.17975	0	3.75467	3.42415	7.11852	0	2.42073	0	4	3	7	0	2.5	low
1426	PC-3p-21203_233		ACTGTGGGTCACTCTGATTGT	down	0.893704	-0.162131	0.764494	26.8767	24.0198	43.392	17.8347	19.4035	21.3555	26.4967	24.2073	37	19	17	21	26	25	middle
1427	PC-5p-88352_56		ATAAGTGGAGTTCAAACTGGCATG	down	0.733366	-0.447394	0.76524	5.28136	3.87317	2.93189	8.91734	3.99484	0	0	11.6195	2.5	9.5	3.5	0	0	12	middle
1428	mtr-MIR2592bi-p3_2ss4GC18AG		ACCCTCATTTAAACCAAGCCTA	down	0.619378	-0.691109	0.765487	2.73643	1.69488	8.2093	0	0	5.08465	0	0	7	0	0	5	0	0	low
1429	mtr-MIR5297-p3_1ss3GA		ATACGTATCGGGAAGTATCGGATA	up	1.25693	0.329904	0.765812	3.77964	4.75074	0	5.632	5.70692	7.11852	7.13371	0	0	6	5	7	7	0	low
1430	PC-3p-3876_1039		AGGGACCTTGCATGTATCTTGGTT	up	1.13292	0.180045	0.767682	63.6886	72.154	41.0465	76.9707	73.0486	65.592	35.159	115.711	35	82	64	64.5	34.5	119.5	middle
1431	PC-5p-3962_1020		CTTGGTAGCATCAAGCGTCGCG	down	0.951875	-0.071156	0.770918	61.6388	58.6724	51.6013	67.1147	66.2003	44.2365	60.127	71.6537	44	71.5	58	43.5	59	74	middle
1432	PC-5p-95825_51		TGTAAGCAAAAATTGGTCAGCACA	up	1.20287	0.266486	0.773371	3.5657	4.28909	3.51827	3.75467	3.42415	0	5.60506	7.26219	3	4	3	0	5.5	7.5	low
1433	PC-5p-15573_311		AGGGATTTTGGTGAGGGACATA	down	0.870747	-0.199674	0.774146	37.1762	32.3711	52.1877	7.97867	51.3623	29.491	35.6686	31.9537	44.5	8.5	45	29	35	33	middle
1434	gma-miR1514a-5p_L-1R+1_1ss8TC		TCATTTCTAAAATAGGCATTG	down	0.915872	-0.126782	0.774315	6.95685	6.37158	8.79567	7.50934	4.56554	9.15238	5.60506	4.35732	7.5	8	4	9	5.5	4.5	middle
1435	PC-3p-87064_57		TAGGCACCGTATTTGAATTTCAAA	down	0.745355	-0.424001	0.774369	7.03731	5.24529	16.4186	4.69334	0	5.08465	0	10.6512	14	5	0	5	0	11	middle
1436	PC-5p-33119_154		CATCTAATGATGTGTTGCCACGTC	up	1.07759	0.107813	0.776392	8.92508	9.61761	7.62292	11.7333	7.419	7.11852	8.66237	13.072	6.5	12.5	6.5	7	8.5	13.5	middle
1437	mtr-MIR2652h-p3		AAGGATTCCTTATGCACCATAACC	down	0.637761	-0.648913	0.777833	1.33161	0.849252	0	0	3.99484	0	2.54776	0	0	0	3.5	0	2.5	0	low
1438	mtr-miR1510b-3p_1ss8CT		ACATGGTTGGTATCCCTGGAA	up	1.56416	0.645392	0.778877	0.977297	1.52865	2.93189	0	0	0	4.58596	0	2.5	0	0	0	4.5	0	low
1439	PC-5p-140332_31		TCACAACTGCGAGTGCATCTGC	up	1.56416	0.645392	0.778877	1.95459	3.05731	5.86378	0	0	0	9.17192	0	5	0	0	0	9	0	low
1440	mtr-MIR2630x-p5_1ss18AT		TTTGATTTTAGTCCCTCTAAA	down	0.833527	-0.262699	0.781402	3.24557	2.70527	0.62547	6.25778	2.85346	1.69488	2.54776	3.87317	0.533333	6.66667	2.5	1.66667	2.5	4	low
1441	mtr-MIR2630y-p5_1ss18AT		TTTGATTTTAGTCCCTCTAAA	down	0.833527	-0.262699	0.781402	3.24557	2.70527	0.62547	6.25778	2.85346	1.69488	2.54776	3.87317	0.533333	6.66667	2.5	1.66667	2.5	4	low
1442	mtr-MIR2630w-p5_1ss18AT		TTTGATTTTAGTCCCTCTAAA	down	0.833527	-0.262699	0.781402	3.24557	2.70527	0.62547	6.25778	2.85346	1.69488	2.54776	3.87317	0.533333	6.66667	2.5	1.66667	2.5	4	low
1443	PC-5p-85475_58		AATTCTTGTGTGGACCTAAAGATT	down	0.897266	-0.156393	0.781417	8.55024	7.67183	5.86378	14.08	5.70692	8.13545	7.13371	7.74634	5	15	5	8	7	8	middle
1444	PC-3p-64574_79		AATAAGCTTACGTTAGAGACTAAA	down	0.829042	-0.270483	0.782115	5.41535	4.48955	9.96843	0	6.27761	4.57619	3.56686	5.32561	8.5	0	5.5	4.5	3.5	5.5	low
1445	PC-3p-147310_28		TTTCATAGAAAGGTGTGCGATC	down	0.644726	-0.633243	0.782502	1.25156	0.806911	0	3.75467	0	0	0	2.42073	0	4	0	0	0	2.5	low
1446	mtr-MIR399l-p5_1ss14CT		GGGCACCTCTCTCTTGGCAAG	up	1.55099	0.633186	0.782519	1.09511	1.6985	0	3.28534	0	0	5.09551	0	0	3.5	0	0	5	0	low
1447	mtr-MIR2630j-p3		AAGGACCAAATCCAATATGAATCA	up	1.18496	0.244843	0.782522	2.07533	2.45919	2.51305	3.71295	0	1.33654	3.65259	2.38846	2.14286	3.95556	0	1.31429	3.58413	2.46667	low
1448	mtr-MIR2630g-p3		AAGGACCAAATCCAATATGAATCA	up	1.18496	0.244843	0.782522	2.07533	2.45919	2.51305	3.71295	0	1.33654	3.65259	2.38846	2.14286	3.95556	0	1.31429	3.58413	2.46667	low
1449	PC-5p-142729_30		TAGAGTTGGGTGACATTGGTGACA	up	1.35567	0.439003	0.784988	1.25156	1.69669	0	3.75467	0	2.54233	2.54776	0	0	4	0	2.5	2.5	0	low
1450	gma-miR171k-3p		TTGAGCCGCGCCAATATCACT	up	1.08076	0.11205	0.784999	439.684	475.194	484.818	434.978	399.256	489.957	273.119	662.506	413.4	463.4	349.8	481.8	268	684.2	middle
1451	ptc-miR6478_R+4_1ss21GA		CCGACCTTAGCTCAGTTGGTAGAGC	down	0.858389	-0.220296	0.785286	9.53362	8.18356	5.2774	5.632	17.6915	5.08465	11.7197	7.74634	4.5	6	15.5	5	11.5	8	middle
1452	PC-3p-181685_20		ATAAAGGCACCAAAGGCACCGAAG	down	0.811866	-0.300687	0.785895	2.2365	1.81573	0	3.28534	3.42415	2.54233	0	2.90488	0	3.5	3	2.5	0	3	low
1453	mtr-miR159a_R+3		TTTGGATTGAAGGGAGCTCTACAC	down	0.650026	-0.62143	0.786052	1.56445	1.01693	0	4.69334	0	3.05079	0	0	0	5	0	3	0	0	low
1454	mtr-miR167b-3p_L+1		AGATCATGTTGGAGCTTCACC	down	0.845485	-0.242148	0.786159	36.2314	30.6332	45.7375	15.0187	47.9381	38.6434	0	53.2561	39	16	42	38	0	55	middle
1455	PC-5p-1246_2610		TTAATCAGTGAAATCACAGTT	up	1.17357	0.230907	0.786296	154.299	181.081	163.6	9.38667	289.912	190.675	109.044	243.526	139.5	10	254	187.5	107	251.5	middle
1456	PC-5p-60109_85		ACAGGTTGGTGCTGAAAATGCC	up	1.15307	0.205483	0.786632	22.9268	26.4362	29.3189	36.608	2.85346	38.6434	19.3629	21.3024	25	39	2.5	38	19	22	middle
1457	PC-5p-234442_13		TGAAAGGAACAAGAATCACAAC	down	0.651414	-0.618353	0.786981	3.12889	2.0382	0	9.38667	0	0	6.11461	0	0	10	0	0	6	0	low
1458	mtr-MIR2630e-p3		AAATATTCTACATATTACAAGGAC	up	1.33987	0.422089	0.787418	3.74833	5.02226	8.37683	2.86815	0	2.20819	12.213	0.645528	7.14286	3.05556	0	2.17143	11.9841	0.666667	middle
1459	mtr-MIR2630o-p3		AAATATTCTACATATTACAAGGAC	up	1.33987	0.422089	0.787418	3.74833	5.02226	8.37683	2.86815	0	2.20819	12.213	0.645528	7.14286	3.05556	0	2.17143	11.9841	0.666667	middle
1460	mtr-MIR2630b-p3		AAATATTCTACATATTACAAGGAC	up	1.33987	0.422089	0.787418	3.74833	5.02226	8.37683	2.86815	0	2.20819	12.213	0.645528	7.14286	3.05556	0	2.17143	11.9841	0.666667	middle
1461	PC-3p-153565_27		AAGAAGGGTAGCTTGATCTCC	up	1.30923	0.388723	0.787654	2.54097	3.32673	7.62292	0	0	3.55926	2.54776	3.87317	6.5	0	0	3.5	2.5	4	low
1462	PC-3p-30414_167		CGAATGCTGGAGTCTTGCTGTT	up	1.23002	0.298682	0.787834	28.5448	35.1106	38.701	46.9334	0	0	54.0124	51.3195	33	50	0	0	53	53	middle
1463	gma-miR1514a-3p_1ss13AG		ATGCCTATTTTAGAATGAAAA	down	0.962191	-0.0556044	0.789056	10.7522	10.3457	10.5548	13.1413	8.56038	10.1693	10.7006	10.1671	9	14	7.5	10	10.5	10.5	middle
1464	PC-5p-1672_2054		TAATCAGGGAAATCACAGTTA	down	0.912565	-0.132001	0.792644	151.897	138.616	116.689	113.579	225.423	142.879	85.6046	187.365	99.5	121	197.5	140.5	84	193.5	middle
1465	PC-3p-129075_34		TAGACCGTGAGAAAATTGTGAAGG	down	0.829356	-0.269936	0.793197	14.9922	12.4339	9.96843	28.16	6.84831	0	19.8725	17.4293	8.5	30	6	0	19.5	18	middle
1466	PC-3p-56335_91		AAAGTTGTTTTGGACCGTCAACCC	down	0.801746	-0.318782	0.793211	9.16633	7.34907	0	20.6507	6.84831	8.13545	7.13371	6.77805	0	22	6	8	7	7	middle
1467	mtr-MIR5272f-p5_1ss14AG		AAAAGTGAGTTGGGTGTGAATTGA	up	1.44317	0.52924	0.794277	2.2365	3.22764	0	3.28534	3.42415	0	0	9.68293	0	3.5	3	0	0	10	low
1468	PC-5p-72838_70		AACTCACGTTCGGTATTTTTCAGC	down	0.945067	-0.0815112	0.795508	4.57194	4.32079	3.51827	5.632	4.56554	3.05079	4.58596	5.32561	3	6	4	3	4.5	5.5	low
1469	PC-5p-15517_312		AGAGATATATGGAATGAAAGA	down	0.926761	-0.10973	0.797651	19.3757	17.9566	15.2458	15.488	27.3932	19.8301	22.4202	11.6195	13	16.5	24	19.5	22	12	middle
1470	PC-5p-2675_1397		AAGACCGACCACAACTCCAAC	up	1.42806	0.514053	0.80009	166.421	237.659	419.847	7.50934	71.9072	687.445	7.13371	18.3976	358	8	63	676	7	19	middle
1471	ghr-miR172_R+1_1ss9GT		AGAATCCTTATGATGCTGCAGT	up	1.48618	0.571608	0.801302	0.977297	1.45244	2.93189	0	0	0	0	4.35732	2.5	0	0	0	0	4.5	low
1472	mtr-MIR2630q-p5		TTTGGTCCTTGGTATTTTGTT	down	0.750258	-0.414542	0.801494	0.33886	0.254233	0.62547	0.391111	0	0.762698	0	0	0.533333	0.416667	0	0.75	0	0	low
1473	mtr-MIR2630p-p5		TTTGGTCCTTGGTATTTTGTT	down	0.750258	-0.414542	0.801494	0.33886	0.254233	0.62547	0.391111	0	0.762698	0	0	0.533333	0.416667	0	0.75	0	0	low
1474	mtr-MIR2630j-p5		TTTGGTCCTTGGTATTTTGTT	down	0.750258	-0.414542	0.801494	0.33886	0.254233	0.62547	0.391111	0	0.762698	0	0	0.533333	0.416667	0	0.75	0	0	low
1475	mtr-MIR2630i-p5		TTTGGTCCTTGGTATTTTGTT	down	0.750258	-0.414542	0.801494	0.33886	0.254233	0.62547	0.391111	0	0.762698	0	0	0.533333	0.416667	0	0.75	0	0	low
1476	mtr-MIR2630n-p5		TTTGGTCCTTGGTATTTTGTT	down	0.750258	-0.414542	0.801494	0.33886	0.254233	0.62547	0.391111	0	0.762698	0	0	0.533333	0.416667	0	0.75	0	0	low
1477	mtr-MIR2630a-p5		TTTGGTCCTTGGTATTTTGTT	down	0.750258	-0.414542	0.801494	0.33886	0.254233	0.62547	0.391111	0	0.762698	0	0	0.533333	0.416667	0	0.75	0	0	low
1478	mtr-MIR2630g-p5		TTTGGTCCTTGGTATTTTGTT	down	0.750258	-0.414542	0.801494	0.33886	0.254233	0.62547	0.391111	0	0.762698	0	0	0.533333	0.416667	0	0.75	0	0	low
1479	mtr-MIR2630e-p5		TTTGGTCCTTGGTATTTTGTT	down	0.750258	-0.414542	0.801494	0.33886	0.254233	0.62547	0.391111	0	0.762698	0	0	0.533333	0.416667	0	0.75	0	0	low
1480	mtr-MIR2630s-p5		TTTGGTCCTTGGTATTTTGTT	down	0.750258	-0.414542	0.801494	0.33886	0.254233	0.62547	0.391111	0	0.762698	0	0	0.533333	0.416667	0	0.75	0	0	low
1481	mtr-MIR2630r-p5		TTTGGTCCTTGGTATTTTGTT	down	0.750258	-0.414542	0.801494	0.33886	0.254233	0.62547	0.391111	0	0.762698	0	0	0.533333	0.416667	0	0.75	0	0	low
1482	mtr-MIR2630o-p5		TTTGGTCCTTGGTATTTTGTT	down	0.750258	-0.414542	0.801494	0.33886	0.254233	0.62547	0.391111	0	0.762698	0	0	0.533333	0.416667	0	0.75	0	0	low
1483	mtr-MIR2630b-p5		TTTGGTCCTTGGTATTTTGTT	down	0.750258	-0.414542	0.801494	0.33886	0.254233	0.62547	0.391111	0	0.762698	0	0	0.533333	0.416667	0	0.75	0	0	low
1484	mtr-MIR2638b-p5_1ss7AG		AGGGACGAAAGACCTATTTAAGCC	up	1.1045	0.143389	0.801766	29.9564	33.0868	18.7641	45.9947	25.1105	27.4571	22.4202	49.3829	16	49	22	27	22	51	middle
1485	PC-5p-231938_13		TAGTGCTCTCACTTGATACACCCT	up	1.48461	0.570085	0.801775	2.28277	3.38902	0	0	6.84831	0	0	10.1671	0	0	6	0	0	10.5	middle
1486	mtr-miR5559-3p_1ss3TC		TCCAATTATTCACCAAGTAAA	up	1.32871	0.410025	0.803663	25.8006	34.2815	77.4019	0	0	39.6603	63.1843	0	66	0	0	39	62	0	middle
1487	mtr-MIR2586a-p3_2ss4TC17CT		CTACGAAGCACGGATATGGACACG	down	0.677111	-0.562536	0.804127	1.25156	0.847442	0	3.75467	0	2.54233	0	0	0	4	0	2.5	0	0	low
1488	mtr-miR2585a_L+1R+1_2ss16AG19GA		CCAGGATTAGCGATTGCAAGGACC	up	1.47366	0.559403	0.805106	1.09511	1.61382	0	3.28534	0	0	0	4.84146	0	3.5	0	0	0	5	low
1489	PC-3p-127643_35		TGTCCCTCATCCTCATCCTTCT	up	1.47366	0.559403	0.805106	1.09511	1.61382	0	3.28534	0	0	0	4.84146	0	3.5	0	0	0	5	low
1490	PC-5p-160168_25		TACTTGGTGAATAATTGGATC	up	1.21522	0.28122	0.80622	1.95498	2.37573	3.51827	2.34667	0	3.05079	4.07641	0	3	2.5	0	3	4	0	low
1491	PC-3p-68880_74		AAAATAATCTCTTGAAACAACTTC	up	1.04904	0.0690762	0.809389	5.89068	6.17959	5.86378	6.10134	5.70692	4.57619	8.15282	5.80976	5	6.5	5	4.5	8	6	low
1492	lus-MIR167i-p3		ACTAGATCATATGGCAGCTTCACC	down	0.688046	-0.539423	0.811387	2.34551	1.61382	7.03654	0	0	0	0	4.84146	6	0	0	0	0	5	low
1493	PC-3p-89852_55		ACACCTCTTGGCTCCCCAATGCAT	down	0.688046	-0.539423	0.811387	2.34551	1.61382	7.03654	0	0	0	0	4.84146	6	0	0	0	0	5	middle
1494	PC-5p-264992_11		AGTGTCCCGGGCACTCTTTAAGCA	down	0.688046	-0.539423	0.811387	2.34551	1.61382	7.03654	0	0	0	0	4.84146	6	0	0	0	0	5	low
1495	gma-MIR156d-p3_1ss3TC_2		GCCCTCTATACTTCTGTCATCA	down	0.767111	-0.382492	0.813713	2.31414	1.7752	3.51827	0	3.42415	0	0	5.32561	3	0	3	0	0	5.5	middle
1496	PC-3p-98348_49		AGTGTCCAACGACAGTTAACTGCC	down	0.857377	-0.221998	0.813868	7.42414	6.36529	0	13.1413	9.13107	6.10158	8.15282	4.84146	0	14	8	6	8	5	middle
1499	PC-5p-122011_37		CTATCCCGTTGGAAACCTAGTCAA	up	1.4445	0.530573	0.814191	1.408	2.03386	0	4.224	0	6.10158	0	0	0	4.5	0	6	0	0	low
1497	mtr-MIR2646a-p3_2ss3AG21AT		TAGAATTACACACGTGGCACTC	up	1.4445	0.530573	0.814191	0.938667	1.35591	0	2.816	0	4.06772	0	0	0	3	0	4	0	0	low
1498	mtr-MIR2646a-p5_2ss3AG21AT		TAGAATTACACACGTGGCACTC	up	1.4445	0.530573	0.814191	0.938667	1.35591	0	2.816	0	4.06772	0	0	0	3	0	4	0	0	low
1500	mtr-MIR2652h-p3_1ss8TC		TAAGGATCCCTTATGCACCATAAC	up	1.44419	0.530256	0.814292	1.56445	2.25935	0	4.69334	0	0	0	6.77805	0	5	0	0	0	7	low
1501	PC-3p-244060_12		ATTTTTCACCACCTCGTTCACGCC	up	1.44419	0.530256	0.814292	0.782223	1.12967	0	2.34667	0	0	0	3.38902	0	2.5	0	0	0	3.5	low
1502	mtr-MIR5271a-p3_1ss14AG		AATGGTTCGGTTCGAGAATTGGTT	down	0.723023	-0.467887	0.814331	6.57067	4.75074	0	19.712	0	7.11852	7.13371	0	0	21	0	7	7	0	middle
1503	PC-3p-96350_50		CAGAGGACCAAAATCATAGAT	down	0.759892	-0.396134	0.815145	5.8115	4.41611	11.7276	0	5.70692	0	13.2483	0	10	0	5	0	13	0	middle
1504	PC-5p-133741_33		ATTGAACAGTGCTTGGACACACAC	up	1.20485	0.268856	0.815444	2.07241	2.49695	2.93189	3.28534	0	0	4.58596	2.90488	2.5	3.5	0	0	4.5	3	low
1505	PC-3p-136775_32		CAAAATTGTTTTGAACTGTCGACC	down	0.768267	-0.380321	0.815452	2.42673	1.86437	0	3.28534	3.99484	5.59312	0	0	0	3.5	3.5	5.5	0	0	low
1506	lja-miR1511-3p_R-3_1ss4CT		AACTAGGCTCTGATACCATGA	down	0.770612	-0.375923	0.81786	1.75952	1.35591	2.93189	2.34667	0	4.06772	0	0	2.5	2.5	0	4	0	0	low
1507	vvi-miR845a_L-1R-2_1ss15AC		AGCTCTGATACCACTTGA	down	0.875809	-0.191312	0.818221	21.6219	18.9367	41.0465	11.264	12.5552	15.254	27.5158	14.0402	35	12	11	15	27	14.5	middle
1508	mtr-MIR2611-p5		ATCTGAGCAAGAAGTTCACCGACT	up	1.28958	0.366905	0.821893	2.816	3.63147	0	8.448	0	5.08465	0	5.80976	0	9	0	5	0	6	low
1509	mtr-MIR2593d-p5_2ss18TA22AG		GATGTATGTGGTTCATAATATGGA	up	1.41392	0.499696	0.824077	2.28277	3.22764	0	0	6.84831	0	0	9.68293	0	0	6	0	0	10	low
1510	mtr-MIR162-p5		GGATGCAGCGGTTCATCGATC	up	1.04716	0.0664777	0.824254	104.31	109.229	118.448	66.6454	127.835	105.761	120.254	101.671	101	71	112	104	118	105	middle
1511	PC-5p-3895_1034		TAGTGTATAGGGTTAGATGTA	up	1.12397	0.168606	0.825758	56.5748	63.5885	43.9784	78.3787	47.3674	10.6778	96.8147	83.2732	37.5	83.5	41.5	10.5	95	86	middle
1512	PC-5p-195143_18		AAGATTCAGTGACTTTAAGGTGGG	down	0.782763	-0.353353	0.828541	2.26787	1.7752	3.51827	3.28534	0	0	0	5.32561	3	3.5	0	0	0	5.5	low
1513	PC-3p-93794_52		CAATGACACACAAGCTATGACACC	down	0.840066	-0.251426	0.828591	5.85969	4.92253	0	8.448	9.13107	5.08465	0	9.68293	0	9	8	5	0	10	middle
1514	PC-3p-132560_33		TTTCGTTCCATACATCATCTAT	up	1.28204	0.358438	0.829228	1.72089	2.20625	0	5.16267	0	2.54233	4.07641	0	0	5.5	0	2.5	4	0	low
1515	mtr-miR5231		TTATGCAAGTAGATAAGCTCA	down	0.925648	-0.111464	0.829257	184.638	170.91	198.196	186.795	168.925	186.098	258.852	67.7805	169	199	148	183	254	70	middle
1516	PC-3p-54355_95		TGGGATCAGAGATTAGAGAAT	up	1.07421	0.103281	0.831859	7.36064	7.9069	7.62292	7.04	7.419	11.6947	8.15282	3.87317	6.5	7.5	6.5	11.5	8	4	middle
1517	PC-3p-237473_13		CAAAACCAAAAGGGAGAAGAG	up	1.38741	0.47239	0.83295	0.977297	1.35591	2.93189	0	0	4.06772	0	0	2.5	0	0	4	0	0	low
1518	PC-3p-156654_26		AATGAAGTTGTCATGAAAGTTGTC	down	0.722252	-0.469427	0.83392	1.408	1.01693	0	4.224	0	3.05079	0	0	0	4.5	0	3	0	0	low
1519	PC-5p-136831_32		TGCTTCCGCTTACTGGTCTGGTTT	up	1.32692	0.408079	0.834856	1.91596	2.54233	2.93189	2.816	0	7.62698	0	0	2.5	3	0	7.5	0	0	low
1520	mtr-MIR2585c-p3_2ss17GC18CT		ATTGGTCCCTGTATTCCTTAATCC	down	0.723794	-0.46635	0.834929	1.408	1.0191	0	4.224	0	0	3.05731	0	0	4.5	0	0	3	0	low
1521	mtr-MIR2585c-p5_2ss17GC18CT		ATTGGTCCCTGTATTCCTTAATCC	down	0.723794	-0.46635	0.834929	1.408	1.0191	0	4.224	0	0	3.05731	0	0	4.5	0	0	3	0	low
1522	stu-miR397-5p_1ss21CT		ATTGAGTGCAGCGTTGATGAT	down	0.72415	-0.465639	0.835162	1.17276	0.849252	3.51827	0	0	0	2.54776	0	3	0	0	0	2.5	0	low
1523	PC-5p-5597_771		TCATCTTATTTTCGACATTGCA	up	1.06036	0.0845541	0.835389	57.6716	61.1527	55.1196	75.0934	42.8019	56.4397	42.2927	84.7256	47	80	37.5	55.5	41.5	87.5	middle
1524	PC-5p-53804_96		TGTTGCAGATTAACTGTGGTTG	up	1.07394	0.10292	0.835447	4.54338	4.87934	4.10465	6.10134	3.42415	5.59312	6.62416	2.42073	3.5	6.5	3	5.5	6.5	2.5	low
1525	PC-3p-126254_35		TGCCTACGTTTTCCCTCTATT	up	1.37541	0.459867	0.837059	0.938667	1.29106	0	2.816	0	0	0	3.87317	0	3	0	0	0	4	low
1526	PC-3p-194758_18		AGAGGATCCGAACCCGACCGAGTC	down	0.727157	-0.459662	0.837126	2.66323	1.93659	0	0	7.98969	0	0	5.80976	0	0	7	0	0	6	low
1527	mtr-miR396b-3p		GTTCAATAAAGCTGTGGGAAG	up	1.04802	0.0676685	0.839806	7887.95	8266.74	10376.5	5901.4	7385.9	7371.73	10569.1	6859.38	8848	6287	6471	7249	10371	7084	high
1528	PC-5p-167647_23		TAAGTAAGCTTTCATATGGAA	up	1.17323	0.230481	0.840015	4.22768	4.96002	0	4.69334	7.98969	0	7.13371	7.74634	0	5	7	0	7	8	low
1529	lja-MIR5287c-p5		TTTAGGTTCATTCAATAAATG	up	1.22796	0.296265	0.840624	7.11125	8.73234	0	12.2027	9.13107	21.3555	0	4.84146	0	13	8	21	0	5	middle
1530	PC-5p-9535_485		TTTGCCTTCCCCTCCAGCTCC	down	0.954008	-0.0679261	0.842424	56.4333	53.8379	50.4285	73.216	45.6554	58.982	36.6877	65.8439	43	78	40	58	36	68	middle
1531	PC-3p-3216_1199		TGGAGTTGCTGTTGGTCTTGC	down	0.814093	-0.296735	0.842702	242.974	197.804	506.631	6.57067	215.722	510.499	31.5922	51.3195	432	7	189	502	31	53	middle
1532	PC-3p-240170_12		ATAGAGTAGATTCCTTGTACCCAC	down	0.736829	-0.440597	0.843427	1.09511	0.806911	0	3.28534	0	0	0	2.42073	0	3.5	0	0	0	2.5	low
1533	PC-5p-248288_12		AATCCAATTTGACGACGTAACAAT	down	0.736829	-0.440597	0.843427	1.09511	0.806911	0	3.28534	0	0	0	2.42073	0	3.5	0	0	0	2.5	low
1534	PC-3p-97503_50		TAAATCCTCCCCACACATCTT	up	1.21027	0.275333	0.844016	3.0525	3.69437	0	5.16267	3.99484	0	8.66237	2.42073	0	5.5	3.5	0	8.5	2.5	low
1535	PC-5p-131168_34		AATAGGCACCCCCTTTGTGACATC	down	0.742469	-0.429597	0.847088	2.28277	1.69488	0	0	6.84831	5.08465	0	0	0	0	6	5	0	0	middle
1536	gma-miR319c_R+2		TTGGACTGAAGGGAGCTCCTTC	down	0.744054	-0.42652	0.848116	1.14138	0.849252	0	0	3.42415	0	2.54776	0	0	0	3	0	2.5	0	low
1537	mtr-MIR2652f-p3_1ss19GC		TGGGCTGGGATTTATGCACGGTGC	down	0.744054	-0.42652	0.848116	1.14138	0.849252	0	0	3.42415	0	2.54776	0	0	0	3	0	2.5	0	low
1538	csi-miR166c-3p_R+1_1ss9GT		TCGGACCATGCTTCATTCCCT	up	1.06065	0.0849473	0.848599	99.7694	105.82	106.134	64.768	128.406	73.219	150.318	93.9244	90.5	69	112.5	72	147.5	97	middle
1539	mtr-MIR166f-p5_1ss13AC		TATCAAGTCATTCCATGCATG	down	0.74484	-0.424997	0.848625	1.36822	1.0191	4.10465	0	0	0	3.05731	0	3.5	0	0	0	3	0	middle
1540	mtr-MIR166f-p3_1ss13AC		TATCAAGTCATTCCATGCATG	down	0.74484	-0.424997	0.848625	1.36822	1.0191	4.10465	0	0	0	3.05731	0	3.5	0	0	0	3	0	middle
1541	mtr-MIR2630x-p3		AGGACTAAAATGAATATTATAGGG	up	1.07807	0.10845	0.849362	28.808	31.0571	11.3366	46.9334	28.1541	26.2707	34.1399	32.7606	9.66667	50	24.6667	25.8333	33.5	33.8333	middle
1542	mtr-MIR2630y-p3		AGGACTAAAATGAATATTATAGGG	up	1.07807	0.10845	0.849362	28.808	31.0571	11.3366	46.9334	28.1541	26.2707	34.1399	32.7606	9.66667	50	24.6667	25.8333	33.5	33.8333	middle
1543	mtr-MIR2630w-p3		AGGACTAAAATGAATATTATAGGG	up	1.07807	0.10845	0.849362	28.808	31.0571	11.3366	46.9334	28.1541	26.2707	34.1399	32.7606	9.66667	50	24.6667	25.8333	33.5	33.8333	middle
1544	PC-5p-219559_15		ACATAGAGTTGGGTGACATTGGTG	up	1.3393	0.421477	0.849802	1.14138	1.52865	0	0	3.42415	0	4.58596	0	0	0	3	0	4.5	0	low
1545	PC-3p-14852_325		TAAAGTCGACCATTTCTTCTA	down	0.804313	-0.314171	0.850528	22.7583	18.3048	26.9734	41.3014	0	54.9143	0	0	23	44	0	54	0	0	middle
1546	PC-5p-195747_18		TGAAAGTGAATTGATTGGTGA	up	1.32105	0.401683	0.856457	1.95459	2.58211	5.86378	0	0	0	0	7.74634	5	0	0	0	0	8	low
1547	mtr-MIR2646a-p5_2ss4AG22AT		ATAGAATTACACACGTGGCACTCA	up	1.17241	0.229475	0.857097	2.42673	2.84511	0	3.28534	3.99484	0	6.11461	2.42073	0	3.5	3.5	0	6	2.5	low
1548	mtr-MIR2646a-p3_2ss4AG22AT		ATAGAATTACACACGTGGCACTCA	up	1.17241	0.229475	0.857097	2.42673	2.84511	0	3.28534	3.99484	0	6.11461	2.42073	0	3.5	3.5	0	6	2.5	low
1549	PC-3p-126962_35		ATTCTCGACCGTGTAACAAACACC	down	0.758364	-0.399037	0.857351	1.56445	1.18642	0	4.69334	0	3.55926	0	0	0	5	0	3.5	0	0	low
1550	PC-3p-20125_245		ATTCTAGATTTTCTCATGATC	down	0.912055	-0.132808	0.862498	41.4999	37.8501	70.3654	34.7307	19.4035	63.0497	22.4202	28.0805	60	37	17	62	22	29	middle
1551	fve-miR393a_R+1_1ss21CT		TCCAAAGGGATCGCATTGATTT	up	1.0766	0.106488	0.863565	20.9252	22.5282	18.7641	23.4667	20.5449	16.2709	38.7259	12.5878	16	25	18	16	38	13	middle
1552	PC-3p-345191_6		AGAACCTTTTCTTGCCACGGCTGA	up	1.30005	0.37857	0.864298	1.56445	2.03386	0	4.69334	0	6.10158	0	0	0	5	0	6	0	0	low
1553	PC-3p-54151_95		ACTGTGCATTCGTGGTTCAAG	up	1.16638	0.222043	0.864948	9.59673	11.1935	0	9.38667	19.4035	23.3894	10.191	0	0	10	17	23	10	0	middle
1554	PC-3p-66823_76		AACAAGGTAGAATAAGTAAAACTT	down	0.856883	-0.222829	0.865077	20.0822	17.2081	19.9369	30.0373	10.2725	0	6.11461	45.5098	17	32	9	0	6	47	middle
1555	mtr-miR5752a		CATTGTTTGGTTTAGTACAAA	down	0.874719	-0.193109	0.865525	10.2458	8.96217	8.2093	22.528	0	9.15238	6.11461	11.6195	7	24	0	9	6	12	middle
1556	mdm-miR167h_R+1_1ss22AT		TGAAGCTGCCAGCATGATCTTTT	up	1.08995	0.124261	0.866012	74.2446	80.9228	41.0465	141.739	39.9484	57.4566	94.7765	90.5354	35	151	35	56.5	93	93.5	middle
1557	mtr-MIR2088-p5_1ss12TG		CAGTCCAAACTGGAGATGGTT	down	0.817145	-0.291336	0.86604	2.4943	2.0382	0	2.34667	5.13623	0	6.11461	0	0	2.5	4.5	0	6	0	middle
1558	PC-5p-134544_32		TAACCCTCACCTTACAAGCCG	down	0.773841	-0.369891	0.86726	2.19022	1.69488	0	6.57067	0	5.08465	0	0	0	7	0	5	0	0	low
1559	mtr-MIR5211-p3_1ss14CT		TGGTGCCATCCTCTTGCGACA	down	0.916993	-0.125017	0.870025	121.248	111.183	104.375	93.8667	165.501	98.6423	205.859	29.0488	89	100	145	97	202	30	middle
1560	mtr-MIR5267k-p5_1ss18TC		ATAGGCATTTGCTAGAACACACCC	up	1.01282	0.0183707	0.871146	90.0473	91.2012	77.9883	98.5601	93.5935	89.9984	89.681	93.9244	66.5	105	82	88.5	88	97	middle
1561	mtr-MIR5267i-p5_1ss18TC		ATAGGCATTTGCTAGAACACACCC	up	1.01282	0.0183707	0.871146	90.0473	91.2012	77.9883	98.5601	93.5935	89.9984	89.681	93.9244	66.5	105	82	88.5	88	97	middle
1562	rco-MIR171a-p3		TGATTGAGCCGTGCCAATATC	up	1.01884	0.0269213	0.872171	50.6832	51.6378	52.7517	52.2212	47.0767	59.2193	42.0647	53.6296	44.981	55.6333	41.2452	58.2333	41.2762	55.3857	middle
1563	mtr-miR171d		TGATTGAGCCGTGCCAATATC	up	1.01884	0.0269213	0.872171	50.6832	51.6378	52.7517	52.2212	47.0767	59.2193	42.0647	53.6296	44.981	55.6333	41.2452	58.2333	41.2762	55.3857	middle
1564	mes-MIR171c-p3		TGATTGAGCCGTGCCAATATC	up	1.01884	0.0269213	0.872171	50.6832	51.6378	52.7517	52.2212	47.0767	59.2193	42.0647	53.6296	44.981	55.6333	41.2452	58.2333	41.2762	55.3857	middle
1565	PC-5p-9010_510		CTATATCCACTAGTATTGTGACAC	down	0.924159	-0.113787	0.872438	33.8744	31.3053	10.5548	53.9734	37.095	46.7788	22.9298	24.2073	9	57.5	32.5	46	22.5	25	middle
1566	pla-MIR11607-p5_2ss4TA18CG		CACACGGTTGTCTGACAGACT	down	0.880433	-0.183715	0.873841	2.80719	2.47154	0	3.28534	5.13623	0	3.05731	4.35732	0	3.5	4.5	0	3	4.5	low
1567	nta-miR398_R+1		TGTGTTCTCAGGTCGCCCCTGT	up	1.26664	0.341005	0.877191	0.938667	1.18895	0	2.816	0	0	3.56686	0	0	3	0	0	3.5	0	low
1568	PC-3p-186633_19		AAATAGAATTCTGAATTCGATA	up	1.26664	0.341005	0.877191	0.938667	1.18895	0	2.816	0	0	3.56686	0	0	3	0	0	3.5	0	low
1569	gma-miR172i-3p_R+1_1ss1GA		AGAATCTTGATGATGCTGCATT	down	0.979038	-0.0305632	0.877816	420.942	412.118	365.9	487.168	409.757	474.907	424.966	336.482	312	519	359	467	417	347.5	middle
1570	vvi-miR172d_L-2R+1		AGAATCTTGATGATGCTGCATT	down	0.979038	-0.0305632	0.877816	420.942	412.118	365.9	487.168	409.757	474.907	424.966	336.482	312	519	359	467	417	347.5	middle
1571	PC-5p-178910_21		AGACCAGGCCAGACTTTGATAGGC	up	1.19287	0.254439	0.87849	3.12889	3.73236	0	9.38667	0	6.10158	5.09551	0	0	10	0	6	5	0	low
1572	mtr-miR1507-5p_R-1_1ss7GA		AGAGTTATATGGAACGAAAGA	down	0.890837	-0.166766	0.880131	4.63351	4.1277	7.62292	0	6.27761	0	5.60506	6.77805	6.5	0	5.5	0	5.5	7	middle
1573	PC-3p-81120_62		AAGAGTTGTGATGTATGTGTGACC	up	1.12058	0.16424	0.8827	7.87217	8.82136	0	12.2027	11.4138	15.254	11.2101	0	0	13	10	15	11	0	middle
1574	PC-3p-8734_524		CATTTTCAGCACCAACCTGTC	down	0.971275	-0.0420483	0.883782	94.3679	91.6571	104.962	107.947	70.1951	116.439	82.0377	76.4951	89.5	115	61.5	114.5	80.5	79	middle
1575	PC-5p-109835_43		ACGGTCCAAAACAGTTTTGCACAC	down	0.888962	-0.169807	0.886169	3.36298	2.98956	3.51827	6.57067	0	0	5.09551	3.87317	3	7	0	0	5	4	low
1576	mtr-MIR5269b-p5_1ss21AG		ATTGGGTGAAATCAATGTAGGACC	down	0.947857	-0.0772586	0.887667	38.756	36.7352	22.2824	56.32	37.6657	32.5418	23.4393	54.2244	19	60	33	32	23	56	middle
1578	PC-5p-172110_22		AAGGGCACAAGTTAAGAAGTTAGA	up	1.23848	0.308574	0.888463	2.34551	2.90488	7.03654	0	0	0	0	8.71463	6	0	0	0	0	9	low
1577	gma-miR4415b-5p_L-4R+2		TGTGATGGGAATCAATGGCAAC	up	1.23848	0.308574	0.888463	3.12735	3.87317	9.38205	0	0	0	0	11.6195	8	0	0	0	0	12	middle
1579	mtr-MIR2629h-p5_1ss9CA		AGAAGATCATCGGCAGTTAACTGC	up	1.23815	0.308181	0.888601	1.09511	1.35591	0	3.28534	0	4.06772	0	0	0	3.5	0	4	0	0	low
1580	mtr-miR169k_1ss15TC		TGAGCCAGGATGGCCTGCCGG	up	1.23787	0.307864	0.888711	1.56445	1.93659	0	4.69334	0	0	0	5.80976	0	5	0	0	0	6	low
1581	PC-5p-375016_6		TTAACACTCTCTAATACTCACTCT	up	1.23787	0.307864	0.888711	1.56445	1.93659	0	4.69334	0	0	0	5.80976	0	5	0	0	0	6	low
1582	PC-5p-352130_6		AGACACGACACAGACACTGACACG	up	1.23787	0.307864	0.888711	1.56445	1.93659	0	4.69334	0	0	0	5.80976	0	5	0	0	0	6	low
1583	PC-5p-94366_52		AAATGTTCATCGGCAGTTAACTGC	down	0.890547	-0.167237	0.891387	7.82957	6.9726	0	7.50934	15.9794	12.2032	0	8.71463	0	8	14	12	0	9	middle
1584	mtr-MIR159a-p5		GAGCTTCCTTTAGTCCAAATA	up	1.02315	0.0330114	0.893532	124.182	127.056	138.385	115.456	118.704	93.5576	155.923	131.688	118	123	104	92	153	136	middle
1585	mtr-miR160f		GCGTGAAGGGAGTCAAGCAGG	down	0.957947	-0.0619818	0.895025	13.5011	12.9333	18.7641	10.3253	11.4138	14.237	7.13371	17.4293	16	11	10	14	7	18	middle
1586	mtr-miR2643b-5p_2ss12TA19TA		TCTAATCTCTGATCCCAAATA	down	0.963737	-0.053289	0.895165	360.929	347.841	477.312	288.171	317.305	462.703	365.858	214.961	407	307	278	455	359	222	middle
1587	cme-miR166i_R-1_1ss18CT		TCGGACCAGGCTTCATTTT	up	1.04135	0.0584585	0.895271	173.889	181.08	222.824	143.616	155.228	126.099	268.024	149.117	190	153	136	124	263	154	middle
1588	PC-3p-105043_45		AATATCACATGACATTGGCACCTC	up	1.11101	0.15187	0.896326	5.65698	6.28495	0	11.264	5.70692	0	9.17192	9.68293	0	12	5	0	9	10	middle
1589	PC-5p-66046_77		AGGTCCCACTTGCCAAGTATGGTT	down	0.857254	-0.222205	0.896889	7.51301	6.44056	0	14.5493	7.98969	19.3217	0	0	0	15.5	7	19	0	0	middle
1590	PC-3p-163861_24		ATGCTGAGGTAGAAAGATGGT	up	1.21398	0.279745	0.898583	0.977297	1.18642	2.93189	0	0	3.55926	0	0	2.5	0	0	3.5	0	0	low
1591	mtr-miR167a_R+1		TGAAGCTGCCAGCATGATCTAT	down	0.969637	-0.044483	0.899527	7.23072	7.01118	8.2093	8.91734	4.56554	5.59312	8.66237	6.77805	7	9.5	4	5.5	8.5	7	low
1593	PC-5p-244644_12		TTTGAAATTTCAAAACATGGGA	down	0.825655	-0.276388	0.899768	2.34551	1.93659	7.03654	0	0	0	0	5.80976	6	0	0	0	0	6	low
1592	PC-3p-210213_16		AAGGACTAAAACTAAGAACAGAGC	down	0.825655	-0.276388	0.899768	1.95459	1.61382	5.86378	0	0	0	0	4.84146	5	0	0	0	0	5	low
1594	PC-5p-28301_179		TAGCAGTAGCAACTATCACATG	down	0.953697	-0.0683964	0.900161	13.7037	13.0692	8.2093	22.0587	10.8431	13.7286	15.7961	9.68293	7	23.5	9.5	13.5	15.5	10	middle
1595	PC-5p-182161_20		ATGAATCAAAAGTAGAAATAGTTT	up	1.20349	0.267222	0.903007	1.87733	2.25935	0	5.632	0	0	0	6.77805	0	6	0	0	0	7	low
1596	gma-MIR396i-p3		ATAAAGCTGTGGGAAGATACA	up	1.07279	0.101365	0.903281	25.2608	27.0995	42.8056	16.4267	16.5501	48.8127	20.382	12.1037	36.5	17.5	14.5	48	20	12.5	middle
1597	cme-MIR166i-p3_2ss15AG18CT		TCGGACCAGGCTTCGTTTT	up	1.11827	0.161268	0.904844	12.1458	13.5822	22.2824	8.448	5.70692	8.13545	32.6113	0	19	9	5	8	32	0	middle
1598	mtr-miR156b-3p_L-1_1ss5CT		GCTTACTCTCTATCTGTCACC	down	0.972458	-0.0402922	0.908054	1141.38	1109.94	1243.51	1005	1175.63	895.916	1578.59	855.325	1060.33	1070.67	1030	881	1549	883.333	high
1599	mtr-miR156c-3p_L-1		GCTTACTCTCTATCTGTCACC	down	0.972458	-0.0402922	0.908054	1141.38	1109.94	1243.51	1005	1175.63	895.916	1578.59	855.325	1060.33	1070.67	1030	881	1549	883.333	high
1600	cme-MIR156a-p3		GCTTACTCTCTATCTGTCACC	down	0.972458	-0.0402922	0.908054	1141.38	1109.94	1243.51	1005	1175.63	895.916	1578.59	855.325	1060.33	1070.67	1030	881	1549	883.333	high
1601	mtr-MIR393a-p3		ATCATGCCATCCCTTTGGATT	down	0.962828	-0.0546505	0.910258	16.363	15.7547	21.1096	13.1413	14.838	11.1862	24.4585	11.6195	18	14	13	11	24	12	middle
1602	mtr-MIR2604-p3_1ss5AG		TATAGGATTTGCTAGAACACACCC	up	1.01915	0.0273731	0.910596	434.093	442.407	330.717	553.814	417.747	461.687	444.329	421.207	282	590	366	454	436	435	middle
1603	mtr-MIR5557-p5_1ss13AT		TCAACAAGTACTTAGGAAGC	down	0.844426	-0.243957	0.911266	1.408	1.18895	0	4.224	0	0	3.56686	0	0	4.5	0	0	3.5	0	low
1604	gma-MIR5770a-p5_1ss1TA		ATCTTTAGGACTATGGTTTGG	up	1.09752	0.134249	0.911356	44.1515	48.4572	106.134	23.4667	2.85346	17.2878	73.3754	54.7085	90.5	25	2.5	17	72	56.5	middle
1605	gma-MIR5770b-p5_1ss1TA		ATCTTTAGGACTATGGTTTGG	up	1.09752	0.134249	0.911356	44.1515	48.4572	106.134	23.4667	2.85346	17.2878	73.3754	54.7085	90.5	25	2.5	17	72	56.5	middle
1606	lja-miR5287a-3p_L-1R+1		TTGCTTATAATAGTGACCGGA	down	0.995678	-0.00624858	0.913086	211.757	210.842	201.714	220.117	213.439	220.674	200.763	211.088	172	234.5	187	217	197	218	middle
1607	gma-miR5770b_1ss11GA		TTAGGACTATAGTTTGGACAA	up	1.09428	0.129988	0.913171	108.843	119.106	260.352	15.9573	50.2209	136.777	179.872	40.6683	222	17	44	134.5	176.5	42	middle
1611	PC-5p-490301_5		AATAAAGCATGTGAGTACAAGGAA	down	0.848349	-0.237269	0.913649	1.90231	1.61382	0	0	5.70692	0	0	4.84146	0	0	5	0	0	5	low
1610	PC-5p-223696_14		AAAACAGTCCCCGAATGTAGAATC	down	0.848349	-0.237269	0.913649	2.66323	2.25935	0	0	7.98969	0	0	6.77805	0	0	7	0	0	7	low
1608	gma-miR166a-3p_L+2R-2		TTTCGGACCAGGCTTCATTCC	down	0.848349	-0.237269	0.913649	0.951153	0.806911	0	0	2.85346	0	0	2.42073	0	0	2.5	0	0	2.5	low
1609	mtr-MIR2592ab-p5_1ss5GT		TTAGTTTGGTTTAGATGAAGGT	down	0.848349	-0.237269	0.913649	0.951153	0.806911	0	0	2.85346	0	0	2.42073	0	0	2.5	0	0	2.5	low
1612	mtr-miR2590h_L-2R+2		AATGACATGGCAGAATAATCACCC	down	0.98646	-0.0196672	0.914368	398.85	393.45	356.322	444.928	395.299	343.553	366.367	470.429	303.833	474	346.333	337.833	359.5	485.833	middle
1613	gma-miR156b_L+1R-1		TTGACAGAAGAGAGAGAGCAC	up	1.11802	0.160949	0.914492	354.333	396.152	388.992	91.52	582.486	1045.57	117.706	25.1756	331.69	97.5	510.333	1028.17	115.5	26	high
1614	gma-miR1509a_2ss18GA22GT		TTAATCAAGGAAATCACAGTCT	up	1.0912	0.125917	0.915227	3.8448	4.19545	3.51827	5.16267	2.85346	0	9.68147	2.90488	3	5.5	2.5	0	9.5	3	low
1615	csi-miR166f-5p_2ss9GT20TG		GGACTGTTTTCTGGCTCGAGG	up	1.11362	0.155259	0.91691	12.1104	13.4864	11.7276	2.34667	22.257	0	34.6495	5.80976	10	2.5	19.5	0	34	6	middle
1616	mtr-MIR5267o-p5		TATAGGCATTTGCTAGGATACACC	up	1.01707	0.0244166	0.917267	122.924	125.022	89.1295	142.677	136.966	110.845	133.502	130.72	76	152	120	109	131	135	middle
1617	PC-5p-74537_68		TGACTAACTGGCAAAGTTCAGA	down	0.919031	-0.121815	0.917333	3.04971	2.80277	5.86378	3.28534	0	0	3.56686	4.84146	5	3.5	0	0	3.5	5	low
1618	mtr-MIR5286b-p5_2ss15TC20CT		AGGACATGACAGAACAACTTCAGT	up	1.06843	0.0954939	0.919108	2.4943	2.66499	0	2.34667	5.13623	2.54233	2.54776	2.90488	0	2.5	4.5	2.5	2.5	3	low
1619	PC-3p-17129_284		CCATCATCTAAATCAAATCTGA	down	0.968429	-0.0462823	0.919517	15.8236	15.3241	14.6595	14.5493	18.2621	19.3217	19.8725	6.77805	12.5	15.5	16	19	19.5	7	middle
1620	mtr-miR5558-5p		TTTTCCAATTCTAAGTCTATC	up	1.02067	0.0295145	0.919938	94.3258	96.2754	103.789	79.3174	99.8711	117.964	105.987	64.8756	88.5	84.5	87.5	116	104	67	middle
1621	gma-miR396b-5p_R+1		TTCCACAGCTTTCTTGAACTTT	down	0.97786	-0.0323006	0.923036	503.386	492.241	485.521	503.595	521.042	411.348	694.518	370.856	414	536.5	456.5	404.5	681.5	383	middle
1622	PC-5p-281532_10		TTAGAATAAATGGTTGATTTT	down	0.867129	-0.205682	0.92496	0.977297	0.847442	2.93189	0	0	2.54233	0	0	2.5	0	0	2.5	0	0	low
1623	PC-3p-268580_10		TCCACGGATCCAAGTGTTGGGA	down	0.867129	-0.205682	0.92496	1.95459	1.69488	5.86378	0	0	5.08465	0	0	5	0	0	5	0	0	low
1624	PC-5p-64737_79		ACTTTAGTGGCCGTCTGATCAAGA	down	0.939616	-0.0898566	0.92527	13.5019	12.6866	14.0731	15.0187	11.4138	26.4402	0	11.6195	12	16	10	26	0	12	middle
1625	mtr-MIR5208d-p5		AGTCATATTAGTCATATTTGTAGG	down	0.979073	-0.0305116	0.925752	9.84691	9.64084	12.9003	7.50934	9.13107	10.1693	7.13371	11.6195	11	8	8	10	7	12	middle
1626	PC-3p-181813_20		CACTTGTCCAAACTATAGTCT	down	0.86898	-0.202605	0.926066	0.977297	0.849252	2.93189	0	0	0	2.54776	0	2.5	0	0	0	2.5	0	low
1627	mtr-MIR2608-p5_1ss17GT		ACAACTTTCTCTCTCATACTCACA	down	0.976131	-0.034854	0.926443	236.115	230.479	145.422	326.656	236.267	196.268	240.508	254.661	124	348	207	193	236	263	middle
1628	mtr-MIR5282-p3_1ss8TA		AAAATTTAGTGACGGAATTAGAGA	down	0.930218	-0.104359	0.927714	5.70849	5.31014	10.5548	6.57067	0	9.15238	0	6.77805	9	7	0	9	0	7	middle
1629	mtr-miR2598_L+5R-2		AAAATCTAAGGGTGATTATTCTGC	down	0.951869	-0.0711658	0.928522	44.4258	42.2875	9.38205	81.664	42.2312	34.5756	44.8405	47.4463	8	87	37	34	44	49	middle
1630	mtr-miR5234		TTTTGTTGTGGATGGCAGAAG	up	1.03795	0.0537309	0.92902	101.515	105.367	114.93	89.1734	100.442	86.4391	178.343	51.3195	98	95	88	85	175	53	middle
1631	PC-5p-33757_151		TATACGTGACTTGATTTGGGAT	up	1.11577	0.158045	0.931284	11.5446	12.8811	14.6595	0	19.9742	38.6434	0	0	12.5	0	17.5	38	0	0	middle
1632	mtr-MIR2118-p5_2ss4TC18AT_1		TAACTCATCTGAATTGAT	up	1.09494	0.130847	0.933167	5.47286	5.99244	16.4186	0	0	5.08465	6.11461	6.77805	14	0	0	5	6	7	middle
1633	mtr-MIR2118-p5_2ss4TC18AT_2		TAACTCATCTGAATTGATT	up	1.09494	0.130847	0.933167	5.47286	5.99244	16.4186	0	0	5.08465	6.11461	6.77805	14	0	0	5	6	7	middle
1634	ath-miR8175_L-2		TCCCCGGCAACGGCGCCA	up	1.02001	0.028582	0.9333	347.842	354.802	455.029	234.667	353.829	398.637	399.488	266.28	388	250	310	392	392	275	high
1635	mes-MIR156k-p3_1ss9GT		GCTCTCCCTTCTTCTGTCATC	up	1.08865	0.122544	0.934253	61.2799	66.7126	53.9468	16.896	112.997	173.895	21.4011	4.84146	46	18	99	171	21	5	middle
1636	mtr-MIR2655m-p5_1ss21TC		AAGTATCGGTTTGGTCCCTTCTGT	down	0.884195	-0.177563	0.935094	1.09511	0.968293	0	3.28534	0	0	0	2.90488	0	3.5	0	0	0	3	low
1637	mtr-MIR2655b-p5_1ss18TC		AAGTATCGGTTTGGTCCCTTCTGT	down	0.884195	-0.177563	0.935094	1.09511	0.968293	0	3.28534	0	0	0	2.90488	0	3.5	0	0	0	3	low
1638	PC-3p-258385_11		AGGGGTTGTCACACAAGTTGTACA	down	0.884195	-0.177563	0.935094	1.09511	0.968293	0	3.28534	0	0	0	2.90488	0	3.5	0	0	0	3	low
1639	PC-3p-235323_13		TATCATCTTTTGTTTGTAGTCCTC	down	0.884195	-0.177563	0.935094	2.19022	1.93659	0	6.57067	0	0	0	5.80976	0	7	0	0	0	6	low
1640	PC-3p-255641_11		AAATTTCGTGCTTACTGTCAGGGA	down	0.884195	-0.177563	0.935094	2.19022	1.93659	0	6.57067	0	0	0	5.80976	0	7	0	0	0	6	low
1641	mtr-MIR172b-p5		GTAGCATCATCAAGATTCAT	up	1.01429	0.0204765	0.935154	989.317	1003.46	1073.66	974.337	919.956	915.746	1295.79	798.841	915.5	1038	806	900.5	1271.5	825	high
1642	mtr-MIR2586a-p5_2ss11CT19GA		AGCACGGATATGGACACGAACACC	down	0.953783	-0.0682676	0.936768	4.98057	4.75038	5.2774	2.816	6.84831	7.62698	6.62416	0	4.5	3	6	7.5	6.5	0	low
1643	PC-3p-334667_6		CATTAAATTAATGAACCTAAATAGT	down	0.890963	-0.166563	0.939075	1.14138	1.01693	0	0	3.42415	3.05079	0	0	0	0	3	3	0	0	low
1644	mtr-MIR2655o-p3		ATAAAGTTAAGGGACCTAAACGGA	up	1.06092	0.0853226	0.940098	3.95739	4.19849	0	8.448	3.42415	7.62698	2.54776	2.42073	0	9	3	7.5	2.5	2.5	low
1645	mtr-MIR2606b-p3_1ss17TC		TTAGTTAAGAACCATACGAAAAGC	down	0.892865	-0.163486	0.940189	1.90231	1.6985	0	0	5.70692	0	5.09551	0	0	0	5	0	5	0	low
1646	PC-5p-18159_270		TTATGACCTAAATCCTGAACC	down	0.982168	-0.0259583	0.941156	41.5159	40.7756	39.8737	41.3014	43.3726	57.9651	28.5349	35.8268	34	44	38	57	28	37	middle
1647	ath-miR8175_L+1_1ss9GT		CGATCCCCTGCAACGGCGCCA	up	1.05694	0.0798904	0.94158	2.50437	2.64696	3.51827	0	3.99484	4.06772	0	3.87317	3	0	3.5	4	0	4	low
1648	mtr-miR167a_1ss19CT		TGAAGCTGCCAGCATGATTTA	down	0.943677	-0.0836346	0.945239	3.59745	3.39484	4.69103	6.10134	0	3.05079	7.13371	0	4	6.5	0	3	7	0	low
1649	PC-5p-121552_37		ACACGACACGAACACTGACACGTC	up	1.05344	0.075112	0.945816	1.73338	1.82601	0	2.34667	2.85346	0	3.05731	2.42073	0	2.5	2.5	0	3	2.5	low
1650	mtr-MIR2088-p5_2ss5AG19AC_2		CTAGGTTACATTGGACAACACA	down	0.902814	-0.147499	0.94599	0.938667	0.847442	0	2.816	0	2.54233	0	0	0	3	0	2.5	0	0	low
1651	mtr-MIR2088-p5_2ss5AG19AC_1		CTAGGTTACATTGGACAACAC	down	0.902814	-0.147499	0.94599	0.938667	0.847442	0	2.816	0	2.54233	0	0	0	3	0	2.5	0	0	low
1652	PC-5p-358722_6		AAAGCATGTGGGTACAACGAATCC	down	0.902814	-0.147499	0.94599	1.87733	1.69488	0	5.632	0	5.08465	0	0	0	6	0	5	0	0	low
1653	gma-MIR1507b-p5_2ss14GA18GA		AGAGATGTATGGAATGAAAGA	down	0.942753	-0.0850475	0.946456	4.027	3.79647	8.79567	3.28534	0	0	5.09551	6.2939	7.5	3.5	0	0	5	6.5	middle
1654	mtr-MIR2650-p3_2ss18CA24GC		AAAGTCACGCAAAATGTAGGAACC	down	0.904742	-0.144421	0.947109	1.87733	1.6985	0	5.632	0	0	5.09551	0	0	6	0	0	5	0	low
1655	PC-3p-198956_18		TTATTGACCAATGTCACCCAACGC	down	0.904742	-0.144421	0.947109	0.938667	0.849252	0	2.816	0	0	2.54776	0	0	3	0	0	2.5	0	low
1656	PC-3p-263035_11		AGCCAATGCCACATGTCGTCAACC	down	0.904742	-0.144421	0.947109	1.87733	1.6985	0	5.632	0	0	5.09551	0	0	6	0	0	5	0	low
1657	PC-5p-45103_114		GCTATTGGTATTCTATGAAACTCT	down	0.983676	-0.0237456	0.949881	8.46621	8.328	8.79567	10.3253	6.27761	5.08465	10.7006	9.19878	7.5	11	5.5	5	10.5	9.5	middle
1658	mtr-MIR5250-p3_2ss16GA20CT		TGTTTGAGAATGTTAAATATG	up	1.09904	0.136238	0.950085	33.619	36.9485	100.857	0	0	110.845	0	0	86	0	0	109	0	0	middle
1659	mtr-MIR399l-p5		GGGCACCTCTCTCCTGGCAAG	up	1.07852	0.109049	0.951738	3.77964	4.07641	0	5.632	5.70692	0	12.2292	0	0	6	5	0	12	0	middle
1660	PC-5p-86573_57		ATCTTTAGTACTATGGTTTGG	down	0.931587	-0.102238	0.952319	3.90919	3.64175	11.7276	0	0	2.54233	3.05731	5.32561	10	0	0	2.5	3	5.5	middle
1661	mtr-MIR2587d-p3_1ss4GT		ATTTCAGCTTGTGTGGGGTTCATA	down	0.977501	-0.0328292	0.953293	12.1441	11.8708	8.28748	19.7746	8.37015	8.20324	12.433	14.9763	7.06667	21.0667	7.33333	8.06667	12.2	15.4667	middle
1662	PC-3p-6518_676		ACATTCTATATTTTCTCCCACC	up	1.05454	0.0766179	0.954012	151.825	160.106	267.388	175.531	12.5552	380.332	24.4585	75.5268	228	187	11	374	24	78	middle
1663	mtr-miR5211_L+2R-3		TGTCGCAGGAGTGATGGGACC	down	0.979714	-0.0295681	0.954975	6705.85	6569.81	7221.83	4791.9	8103.83	8484.25	8618.55	2606.64	6158	5105	7100	8343	8457	2692	high
1664	PC-3p-150728_27		AAACGAGAAACTTTTGACGAAGAC	up	1.03825	0.0541552	0.95537	5.38272	5.58861	2.93189	7.50934	5.70692	0	6.11461	10.6512	2.5	8	5	0	6	11	middle
1665	PC-5p-52190_99		TTGTCGCATGAGTGATGGGACC	down	0.945895	-0.0802479	0.955787	15.4381	14.6028	24.6279	0	21.6863	6.10158	37.7068	0	21	0	19	6	37	0	middle
1668	PC-5p-211821_16		TGTCCCCAGGGCACTCTTTAAGCA	up	1.08569	0.118613	0.956508	1.56445	1.6985	0	4.69334	0	0	5.09551	0	0	5	0	0	5	0	low
1666	PC-3p-141259_30		TCTCTTGTTTTTGTCTAACTG	up	1.08569	0.118613	0.956508	0.782223	0.849252	0	2.34667	0	0	2.54776	0	0	2.5	0	0	2.5	0	low
1667	PC-5p-340503_6		ATTTTTCAGCAGTAGTTAACTCAC	up	1.08569	0.118613	0.956508	0.938667	1.0191	0	2.816	0	0	3.05731	0	0	3	0	0	3	0	low
1669	mtr-miR2669a_L-1R+3_1ss12TC		AAGTTCAGTCCTCATAGTATCATC	down	0.988686	-0.0164156	0.957444	27.1083	26.8016	19.9369	32.8534	28.5346	26.4402	33.6304	20.3341	17	35	25	26	33	21	middle
1670	mtr-MIR2087-p5_2ss13AG20GA		CTACCGAAGTAAGGAACCGACTGC	up	1.08338	0.115536	0.95763	1.56445	1.69488	0	4.69334	0	5.08465	0	0	0	5	0	5	0	0	middle
1671	mtr-MIR2680a-p5_2ss22AG24TC		ATCTTCATAGGACCATGCAAAGAC	up	1.0446	0.0629447	0.958371	1.90047	1.98522	0	3.98934	1.71208	3.05079	0	2.90488	0	4.25	1.5	3	0	3	low
1672	mtr-MIR2680c-p5_2ss22AG24TC		ATCTTCATAGGACCATGCAAAGAC	up	1.0446	0.0629447	0.958371	1.90047	1.98522	0	3.98934	1.71208	3.05079	0	2.90488	0	4.25	1.5	3	0	3	low
1673	mtr-MIR2680b-p5_2ss22AG24TC		ATCTTCATAGGACCATGCAAAGAC	up	1.0446	0.0629447	0.958371	1.90047	1.98522	0	3.98934	1.71208	3.05079	0	2.90488	0	4.25	1.5	3	0	3	low
1674	mtr-MIR2680d-p5_2ss22AG24TC		ATCTTCATAGGACCATGCAAAGAC	up	1.0446	0.0629447	0.958371	1.90047	1.98522	0	3.98934	1.71208	3.05079	0	2.90488	0	4.25	1.5	3	0	3	low
1675	PC-3p-183899_20		ATTCTAAAATCCGAACTGCATAGG	up	1.0616	0.0862436	0.960026	1.71208	1.81754	0	0	5.13623	0	2.54776	2.90488	0	0	4.5	0	2.5	3	low
1676	PC-5p-192186_19		TCAACACTCTCACCAACACTCACT	down	0.928609	-0.106857	0.9608	1.09511	1.01693	0	3.28534	0	3.05079	0	0	0	3.5	0	3	0	0	low
1677	lja-MIR11091-p5_2ss10TA22GA		GAAGTTGAGAAGAGAGAAATAAGT	down	0.930592	-0.103779	0.961924	1.09511	1.0191	0	3.28534	0	0	3.05731	0	0	3.5	0	0	3	0	low
1678	lja-MIR11091-p3_2ss10TA22GA		GAAGTTGAGAAGAGAGAAATAAGT	down	0.930592	-0.103779	0.961924	1.09511	1.0191	0	3.28534	0	0	3.05731	0	0	3.5	0	0	3	0	low
1679	PC-3p-24638_203		TTCAGCAACATGAGTTAACTCA	down	0.968879	-0.0456114	0.96243	33.4499	32.4089	30.4917	25.344	44.514	70.1682	18.3438	8.71463	26	27	39	69	18	9	middle
1680	PC-3p-169370_23		CGGAGATGAACAAAAACAGATGGG	down	0.96934	-0.0449255	0.962883	3.10159	3.0065	4.10465	2.34667	2.85346	0	6.11461	2.90488	3.5	2.5	2.5	0	6	3	low
1681	mtr-MIR5281c-p5		CCTCCGGTCCTATTTATAAGAGAA	up	1.02006	0.0286498	0.963589	56.3278	57.4576	50.4285	75.5627	42.9921	53.3889	94.7765	24.2073	43	80.5	37.6667	52.5	93	25	middle
1682	mtr-MIR5281b-p5		CCTCCGGTCCTATTTATAAGAGAA	up	1.02006	0.0286498	0.963589	56.3278	57.4576	50.4285	75.5627	42.9921	53.3889	94.7765	24.2073	43	80.5	37.6667	52.5	93	25	middle
1683	PC-3p-90483_54		AACAAGTCAAGTGTCAAGAGGAAT	down	0.94732	-0.0780762	0.963895	5.79212	5.48699	0	9.38667	7.98969	0	0	16.461	0	10	7	0	0	17	middle
1684	PC-5p-173184_22		GAAAGATGCTGATAAGTAGAGTCC	down	0.966236	-0.0495526	0.963948	1.88982	1.82601	0	2.816	2.85346	0	3.05731	2.42073	0	3	2.5	0	3	2.5	low
1685	PC-3p-138942_31		TGACTGATGTTGACTCGAGGT	up	1.06916	0.0964714	0.964597	0.951153	1.01693	0	0	2.85346	3.05079	0	0	0	0	2.5	3	0	0	low
1686	mtr-MIR171a-p5_1ss8TA		TGTTGGCATGTCTCAATCAAA	down	0.969658	-0.044452	0.966984	5.86455	5.68661	12.9003	4.69334	0	5.08465	7.13371	4.84146	11	5	0	5	7	5	middle
1687	mtr-MIR2608-p3		CAAAGTTGTCATGAAAGTTGTACC	up	1.01581	0.0226261	0.967654	39.5169	40.1416	22.2824	56.32	39.9484	19.3217	46.8787	54.2244	19	60	35	19	46	56	middle
1688	mtr-MIR5271c-p5		AATTGTGGTTACTAACGGTTCAGT	down	0.977151	-0.0333462	0.967881	7.10476	6.94243	0	10.0907	11.2236	6.77954	6.62416	7.42358	0	10.75	9.83333	6.66667	6.5	7.66667	middle
1689	mtr-MIR5271e-p5		AATTGTGGTTACTAACGGTTCAGT	down	0.977151	-0.0333462	0.967881	7.10476	6.94243	0	10.0907	11.2236	6.77954	6.62416	7.42358	0	10.75	9.83333	6.66667	6.5	7.66667	middle
1690	mtr-MIR5271a-p5		AATTGTGGTTACTAACGGTTCAGT	down	0.977151	-0.0333462	0.967881	7.10476	6.94243	0	10.0907	11.2236	6.77954	6.62416	7.42358	0	10.75	9.83333	6.66667	6.5	7.66667	middle
1691	mtr-MIR5271d-p5		AATTGTGGTTACTAACGGTTCAGT	down	0.977151	-0.0333462	0.967881	7.10476	6.94243	0	10.0907	11.2236	6.77954	6.62416	7.42358	0	10.75	9.83333	6.66667	6.5	7.66667	middle
1692	mtr-miR2587a_1ss11AC		TTGACCGTTCCTATGAACCCTG	down	0.992539	-0.0108044	0.968321	16.3396	16.2177	16.184	17.0837	15.7511	18.3048	10.8534	19.495	13.8	18.2	13.8	18	10.65	20.1333	middle
1693	lja-miR1511-3p_R-3_1ss2AG		AGCCAGGCTCTGATACCATGA	up	1.03569	0.0505936	0.969323	3.07506	3.18482	3.51827	0	5.70692	0	7.13371	2.42073	3	0	5	0	7	2.5	low
1694	PC-3p-214739_15		ACAACGAATTCTTCATGGACACGA	down	0.947955	-0.0771092	0.971685	1.25156	1.18642	0	3.75467	0	3.55926	0	0	0	4	0	3.5	0	0	low
1695	mtr-MIR2593e-p3_2ss1GA21TC		AATTGAATGAACCTAAAAGTC	up	1.02484	0.0354032	0.972038	8.52701	8.73885	17.5913	0	7.98969	12.2032	9.17192	4.84146	15	0	7	12	9	5	middle
1696	PC-3p-32804_155		TGGTCTTATTGAGGAAACATAGTC	up	1.04286	0.0605508	0.972158	6.64562	6.93048	19.9369	0	0	0	9.17192	11.6195	17	0	0	0	9	12	middle
1697	PC-3p-95747_51		TCATTGTAAATGGGACCGGAG	up	1.02557	0.0364217	0.974486	4.21519	4.32296	0	7.50934	5.13623	0	7.64327	5.32561	0	8	4.5	0	7.5	5.5	low
1698	PC-3p-127035_35		AATATCACCCAACTCTATGTCACC	down	0.965322	-0.0509175	0.976627	1.75952	1.6985	2.93189	2.34667	0	0	5.09551	0	2.5	2.5	0	0	5	0	low
1699	PC-5p-81634_61		TCACTGAGTAACTGATGTATC	down	0.991732	-0.0119783	0.977532	4.04026	4.00685	4.10465	5.16267	2.85346	2.54233	5.60506	3.87317	3.5	5.5	2.5	2.5	5.5	4	low
1700	mes-MIR171c-p5		AGATATTGGTGCGGTTCAATC	down	0.993352	-0.00962297	0.979172	24.9553	24.7894	23.4551	29.7245	21.6863	14.576	27.5158	32.2764	20	31.6667	19	14.3333	27	33.3333	middle
1701	mtr-MIR171f-p5		AGATATTGGTGCGGTTCAATC	down	0.993352	-0.00962297	0.979172	24.9553	24.7894	23.4551	29.7245	21.6863	14.576	27.5158	32.2764	20	31.6667	19	14.3333	27	33.3333	middle
1702	gma-miR171c-5p		AGATATTGGTGCGGTTCAATC	down	0.993352	-0.00962297	0.979172	24.9553	24.7894	23.4551	29.7245	21.6863	14.576	27.5158	32.2764	20	31.6667	19	14.3333	27	33.3333	middle
1703	PC-3p-237762_13		AATGAGGGCATATCAAGTGAGAGC	down	0.963265	-0.053996	0.980162	2.34551	2.25935	7.03654	0	0	0	0	6.77805	6	0	0	0	0	7	low
1704	mtr-MIR160f-p5		TGCCTGGCTCCCTGCATGCCA	up	1.0134	0.0192038	0.981634	7.5014	7.60192	5.86378	7.50934	9.13107	11.1862	0	11.6195	5	8	8	11	0	12	middle
1705	mtr-miR5239		TGGGAGAAAAGATAGAATGTG	down	0.995323	-0.00676398	0.982553	87286.9	86878.6	118384	78979.5	64497.3	87964.5	94884.5	77786.8	100945	84140	56508	86500	93106	80334	high
1707	PC-3p-418984_5		TCTTCAATCATTTTTTGTGGGCCC	up	1.03156	0.0448294	0.983527	1.56445	1.61382	0	4.69334	0	0	0	4.84146	0	5	0	0	0	5	low
1708	PC-3p-270640_10		TTTAACCAGTGCCCCGGAGTCACC	up	1.03156	0.0448294	0.983527	1.56445	1.61382	0	4.69334	0	0	0	4.84146	0	5	0	0	0	5	low
1710	PC-5p-268653_10		ATGTCAAAATCACGATGATCCACC	up	1.03156	0.0448294	0.983527	1.56445	1.61382	0	4.69334	0	0	0	4.84146	0	5	0	0	0	5	low
1706	PC-3p-125939_36		AAGAGTTGTGATGTGTGTGTGACC	up	1.03156	0.0448294	0.983527	1.87733	1.93659	0	5.632	0	0	0	5.80976	0	6	0	0	0	6	low
1709	PC-5p-243918_12		AAAGTCAATGCTGATGTAGACGCC	up	1.03156	0.0448294	0.983527	1.87733	1.93659	0	5.632	0	0	0	5.80976	0	6	0	0	0	6	low
1711	mtr-MIR5255-p3		TTACATGACTTGATAGAGGACA	down	0.969542	-0.0446244	0.983602	2.66323	2.58211	0	0	7.98969	0	0	7.74634	0	0	7	0	0	8	low
1712	PC-3p-52372_98		CAAAAAGGGCAGTACTTAGGG	down	0.985452	-0.0211427	0.98509	15.405	15.1809	29.3189	16.896	0	29.491	11.2101	4.84146	25	18	0	29	11	5	middle
1713	lus-miR159b_R+2_1ss21CA		TTTGGATTGAAGGGAGCTCTATT	down	0.998193	-0.00260958	0.985715	632.486	631.343	613.352	596.992	687.113	555.244	730.696	608.088	523	636	602	546	717	628	middle
1714	PC-5p-60140_85		CATTTGGATGGACGTAGACAAATG	up	1.00684	0.00982962	0.985776	16.9148	17.0304	27.5598	8.91734	14.2673	20.8471	14.2674	15.9768	23.5	9.5	12.5	20.5	14	16.5	middle
1715	PC-3p-355107_6		AAGTGTCATCGTGAGTTAACTATC	up	1.01802	0.0257649	0.99053	1.90231	1.93659	0	0	5.70692	0	0	5.80976	0	0	5	0	0	6	low
1716	pla-MIR11607-p5_2ss3TA17CG_1		ACACGGTTGTCTGACAGAC	up	1.00343	0.00493691	0.991564	14.1868	14.2354	11.7276	13.1413	17.6915	21.864	10.191	10.6512	10	14	15.5	21.5	10	11	middle
1717	pla-MIR11607-p5_2ss3TA17CG_2		ACACGGTTGTCTGACAGACT	up	1.00343	0.00493691	0.991564	14.1868	14.2354	11.7276	13.1413	17.6915	21.864	10.191	10.6512	10	14	15.5	21.5	10	11	middle
1718	pla-MIR11607-p3_2ss3TA17CG		ACACGGTTGTCTGACAGACT	up	1.00343	0.00493691	0.991564	14.1868	14.2354	11.7276	13.1413	17.6915	21.864	10.191	10.6512	10	14	15.5	21.5	10	11	middle
1719	mtr-MIR5258-p5_2ss15TA18AG		TAACTCAAATGCAAAGCGGGC	down	0.997121	-0.00416009	0.991899	71.2868	71.0816	85.6112	40.3627	87.8866	76.2698	86.6237	50.3512	73	43	77	75	85	52	middle
1720	PC-3p-57487_89		AATGAAGTGGTGTAAGAATGATGA	down	0.9917	-0.0120239	0.993545	14.4059	14.2863	8.2093	28.16	6.84831	0	5.09551	37.7634	7	30	6	0	5	39	middle
1721	mtr-MIR2087-p3_2ss12TG21CG		AAAGAACCGGCGGCAGTTAAGTGC	up	1.00861	0.0123731	0.994399	2.08005	2.09797	0	2.816	3.42415	0	0	6.2939	0	3	3	0	0	6.5	low
1722	mtr-MIR2087-p5_2ss12TG21CG		AAAGAACCGGCGGCAGTTAAGTGC	up	1.00861	0.0123731	0.994399	2.08005	2.09797	0	2.816	3.42415	0	0	6.2939	0	3	3	0	0	6.5	low
1723	PC-5p-187803_19		TTTGTAGTATATGTAATGAGG	down	0.989741	-0.0148771	0.994531	1.14138	1.12967	0	0	3.42415	0	0	3.38902	0	0	3	0	0	3.5	low
1724	PC-5p-145030_29		CCAACTCTTTGATTGTGGAGA	down	0.990786	-0.013354	0.995091	1.95459	1.93659	5.86378	0	0	0	0	5.80976	5	0	0	0	0	6	middle
1725	PC-5p-9693_478		TGAGCCATGAAGTGGACGGACG	up	1.00112	0.00160857	0.999099	67.4	67.4752	26.9734	55.3814	119.845	175.929	26.4967	0	23	59	105	173	26	0	middle
Following miRNAs do not show significant difference (p-value<0.05).
