# Supplementary material for: Integrated agronomic, physiological, microstructure, and whole-transcriptome analyses reveal the role of biomass accumulation and quality formation during Se biofortification in alfalfa
Source: Front Plant Sci. 2023 Jul 20;14:1198847. doi: 10.3389/fpls.2023.1198847 (PMC10400095; doi:10.3389/fpls.2023.1198847)
Supplement: Supplementary Table S4 — List of 1414 DElncRNAs in alfalfa under Se biofortification. [file Table_4.xlsx]

## Sheet: Sheet1
t_id	class_code	chr	strand	start	end	t_name	num_exons	length	gene_id	gene_name	FPKM.Low_Se1	FPKM.Low_Se2	FPKM.Low_Se3	FPKM.CK1	FPKM.CK2	FPKM.CK3	fc	log2(fc)	pval	qval	regulation	significant
1301	u	15132	.	67110	68221	MSTRG.515.1	1	1112	MSTRG.515	.	0.0001	0.0001	0.0001	120.734	157.562	283.91	5.33612e-07	-20.8377	8.29289e-13	7.7541e-08	down	yes
132538	u	chr4.1	.	49415291	49416438	MSTRG.69946.1	1	1148	MSTRG.69946	.	78.3523	30.7436	33.9799	0.0001	0.0001	0.0001	476919	18.8634	1.47119e-10	2.35448e-06	up	yes
246251	u	chr7.3	.	11490855	11492154	MSTRG.129749.1	1	1300	MSTRG.129749	.	0.0001	0.0001	0.0001	13.1897	8.92247	7.48899	1.01347e-05	-16.5903	5.2604e-08	0.000158665	down	yes
136083	i	chr4.2	.	560586	561481	MSTRG.71777.1	1	896	MSTRG.71777	MS.gene62616	57.3756	25.0495	25.7633	0.123221	0.082994	0.0001	524.384	9.03448	1.25432e-07	0.000300724	up	yes
216948	j	chr6.3	+	24823791	24824468	MSTRG.114237.2	2	578	MSTRG.114237	MS.gene74726	51.1912	41.032	3.08565	0.0001	0.0001	0.0001	317696	18.2773	1.72534e-07	0.000393475	up	yes
259893	i	chr7.4	.	46748517	46750084	MSTRG.136924.1	1	1568	MSTRG.136924	MS.gene46865	8.5805	4.69122	4.95459	0.0001	0.0001	0.0001	60754.4	15.8907	3.95697e-07	0.000739977	up	yes
10265	u	6802	-	31601	39986	MSTRG.5314.1	2	812	MSTRG.5314	.	0.0001	0.0001	0.0001	5.99228	15.9145	14.28	8.29032e-06	-16.8801	4.30157e-07	0.000788647	down	yes
5794	u	41154	.	7409	7624	MSTRG.3040.1	1	216	MSTRG.3040	.	0.0001	0.0001	0.0001	228.381	33.7696	8.93579	1.10666e-06	-19.7854	4.59408e-07	0.000826078	down	yes
202477	u	chr6.1	-	9514604	9515381	MSTRG.106397.1	1	778	MSTRG.106397	.	3.15565	19.8604	15.5657	0.0001	0.0001	0.0001	128606	16.9726	8.17219e-07	0.00123246	up	yes
109808	u	chr3.3	.	56717792	56718188	MSTRG.57777.1	1	397	MSTRG.57777	.	0.0001	0.0001	0.0001	0.339245	150.9	190.126	8.78825e-07	-20.1179	9.46023e-07	0.00139655	down	yes
190211	u	chr5.3	+	56577912	56580462	MSTRG.100041.2	7	1110	MSTRG.100041	.	0.0001	0.0001	0.0001	7.65894	6.27499	7.19276	1.42e-05	-16.1037	1.03473e-06	0.0014765	down	yes
29666	u	chr1.2	-	73612197	73612695	MSTRG.15485.1	1	499	MSTRG.15485	.	13.4048	14.745	18.5763	0.0001	0.0001	0.0001	155754	17.2489	1.0422e-06	0.0014765	up	yes
289551	x	chr8.3	-	57036924	57132682	MSTRG.152445.1	2	813	MSTRG.152445	MS.gene88410	2.32019	20.9873	12.6393	0.0001	0.0001	0.0001	119823	16.8705	1.37315e-06	0.00175882	up	yes
146747	u	chr4.3	.	526436	528271	MSTRG.77411.1	1	1836	MSTRG.77411	.	0.0001	0.0001	0.0001	5.25481	4.06346	2.8755	2.46027e-05	-15.3108	1.56551e-06	0.00195173	down	yes
217764	u	chr6.3	-	37365384	37366731	MSTRG.114584.3	4	761	MSTRG.114584	.	8.07194	18.1816	4.09664	0.0001	0.0001	0.0001	101167	16.6264	2.54835e-06	0.00257464	up	yes
271273	u	chr8.1	.	70408111	70408610	MSTRG.142901.1	1	500	MSTRG.142901	.	3.97398	29.0822	15.1249	0.0001	0.0001	0.0001	160604	17.2931	2.84806e-06	0.002833	up	yes
15185	u	chr1.1	.	38136420	38137786	MSTRG.7819.1	1	1367	MSTRG.7819	.	0.0001	0.0001	0.0001	4.23866	2.67953	6.44011	2.2458e-05	-15.4424	5.2399e-06	0.00422367	down	yes
108394	u	chr3.3	-	43568325	43571533	MSTRG.57002.1	4	1409	MSTRG.57002	.	6.85274	4.20227	2.03728	0.0001	0.0001	0.0001	43641	15.4134	6.2791e-06	0.00476676	up	yes
174365	i	chr5.1	-	69642576	69642990	MSTRG.91813.1	1	415	MSTRG.91813	MS.gene47024	142.82	16.0395	14.6168	0.373115	0.087082	0.0001	376.879	8.55796	6.88956e-06	0.0048939	up	yes
116180	u	chr3.4	.	7565603	7566316	MSTRG.61101.1	1	714	MSTRG.61101	.	4.8756	10.6484	8.03805	0.0001	0.0001	0.0001	78540.1	16.2611	7.66386e-06	0.00511853	up	yes
289552	o	chr8.3	+	57036924	57141595	MSTRG.152446.1	2	1059	MSTRG.152446	MS.gene88410	1.89062	14.3686	13.5809	0.052127	0.046266	0.023937	243.931	7.93033	8.109e-06	0.00530221	up	yes
282384	i	chr8.2	.	80649539	80650890	MSTRG.148601.1	1	1352	MSTRG.148601	MS.gene42804	6.95984	4.80045	1.6013	0.0001	0.0001	0.0001	44538.6	15.4428	8.21623e-06	0.00533501	up	yes
130575	u	chr4.1	-	30955294	30962086	MSTRG.68872.1	4	1709	MSTRG.68872	.	6.8438	1.93739	1.81552	0.0001	0.0001	0.0001	35322.4	15.1083	9.33016e-06	0.00589458	up	yes
199407	u	chr5.4	.	62244435	62244759	MSTRG.104847.1	1	325	MSTRG.104847	.	0.0001	0.0001	0.0001	19.019	6.63331	27.2294	5.67304e-06	-17.4274	9.87082e-06	0.00611552	down	yes
198511	u	chr5.4	+	53772086	53773627	MSTRG.104346.1	4	955	MSTRG.104346	.	0.752457	19.2526	20.7411	0.0001	0.015803	0.0001	2546.16	11.3141	1.11938e-05	0.00655259	up	yes
4845	u	39840	.	23732	24030	MSTRG.2192.1	1	299	MSTRG.2192	.	2.96751	1.28535	3.19329	253.929	425.936	27.5242	0.0105263	-6.56986	1.42843e-05	0.00757567	down	yes
187711	x	chr5.3	-	24063304	24069326	MSTRG.98746.1	8	955	MSTRG.98746	MS.gene45098	1.42032	11.733	5.27778	0.0001	0.0001	0.0001	61437	15.9068	1.48948e-05	0.00773727	up	yes
216702	u	chr6.3	+	21734263	21744778	MSTRG.114099.1	2	344	MSTRG.114099	.	0.678383	0.0001	0.232276	3.14796	182.039	257.736	0.00205625	-8.92577	1.56344e-05	0.0079577	down	yes
4839	u	39840	.	3207	3446	MSTRG.2184.1	1	240	MSTRG.2184	.	0.0001	0.0001	0.0001	444.66	126.147	0.0001	5.25571e-07	-20.8596	1.64352e-05	0.0081309	down	yes
12771	u	chr1.1	-	12215498	12218707	MSTRG.6587.1	3	1466	MSTRG.6587	.	0.0001	0.0001	0.0001	0.398055	10.6568	3.62555	2.04353e-05	-15.5786	1.76061e-05	0.00843156	down	yes
232148	u	chr7.1	.	52839074	52839443	MSTRG.122326.1	1	370	MSTRG.122326	.	0.0001	0.0001	0.0001	0.21586	38.4869	49.02	3.41987e-06	-18.1576	1.80113e-05	0.00846286	down	yes
124879	i	chr3.4	.	94134148	94135369	MSTRG.65723.1	1	1222	MSTRG.65723	MS.gene072999	0.0001	0.0001	0.0001	2.12592	5.3241	4.26551	2.5607e-05	-15.2531	1.84959e-05	0.00848778	down	yes
82661	o	chr2.4	+	59769560	60113796	MSTRG.43365.1	2	371	MSTRG.43365	MS.gene003279	0.0001	0.0001	0.0001	11.9348	9.11697	15.6298	8.17849e-06	-16.8997	2.12227e-05	0.00944947	down	yes
214113	i	chr6.2	+	86605200	86605696	MSTRG.112843.1	1	497	MSTRG.112843	MS.gene69023	11.6029	6.19461	9.48378	0.0001	0.0001	0.0001	90937.7	16.4726	2.16859e-05	0.00948925	up	yes
132460	u	chr4.1	.	48479431	48479846	MSTRG.69891.1	1	416	MSTRG.69891	.	0.0001	0.0001	0.0001	12.9208	15.9277	5.13932	8.82667e-06	-16.7897	2.25151e-05	0.00974827	down	yes
4867	u	39906	-	10060	21159	MSTRG.2213.1	2	340	MSTRG.2213	.	0.0001	0.0001	0.0001	21.1433	1374.29	0.0001	2.14986e-07	-22.1493	2.25562e-05	0.00974827	down	yes
87873	o	chr3.1	-	35736853	35760182	MSTRG.46217.1	2	221	MSTRG.46217	MS.gene76173	23.9343	16.2685	19.7326	0.0001	0.0001	0.0001	199785	17.6081	2.31592e-05	0.00988794	up	yes
262964	u	chr7.4	+	90909378	90917532	MSTRG.138478.1	2	531	MSTRG.138478	.	0.0001	0.0001	0.0001	20.5458	4.13607	4.79061	1.0179e-05	-16.584	2.41807e-05	0.0102306	down	yes
100077	u	chr3.2	.	58712430	58712823	MSTRG.52610.1	1	394	MSTRG.52610	.	0.0001	0.0001	0.0001	0.0001	75.6611	95.9671	1.74796e-06	-19.1259	2.85766e-05	0.0114441	down	yes
136679	i	chr4.2	+	4096307	4097448	MSTRG.72101.3	3	704	MSTRG.72101	MS.gene06103	6.4806	4.80866	6.5992	0.0001	0.0001	0.0001	59628.2	15.8637	2.86399e-05	0.0114441	up	yes
285712	u	chr8.3	.	19969332	19969759	MSTRG.150391.1	1	428	MSTRG.150391	.	0.0001	0.0001	0.0001	0.0001	85.2828	61.3425	2.04603e-06	-18.8987	3.2324e-05	0.0125456	down	yes
223124	u	chr6.4	.	28483753	28484665	MSTRG.117507.1	1	913	MSTRG.117507	.	0.0001	0.0001	0.0001	7.21102	2.39018	4.28639	2.1602e-05	-15.4985	3.78918e-05	0.0140039	down	yes
281154	u	chr8.2	.	69967385	69967751	MSTRG.147954.1	1	367	MSTRG.147954	.	0.0001	0.0001	0.0001	0.0001	63.3544	83.9705	2.03631e-06	-18.9056	3.85827e-05	0.0141675	down	yes
24104	u	chr1.2	.	24407010	24407815	MSTRG.12653.1	1	806	MSTRG.12653	.	0.0001	0.0001	0.0001	7.55514	3.67422	3.76656	2.00054e-05	-15.6092	4.1023e-05	0.014467	down	yes
280848	u	chr8.2	+	67540688	67541472	MSTRG.147788.1	2	758	MSTRG.147788	.	0.0001	0.0001	0.0001	7.33052	3.69411	4.63202	1.91612e-05	-15.6715	4.10858e-05	0.014467	down	yes
295045	u	chr8.4	.	18567617	18568621	MSTRG.155241.1	1	1005	MSTRG.155241	.	3.53004	2.35471	5.98797	0.0001	0.0001	0.0001	39575.7	15.2723	4.2631e-05	0.0146012	up	yes
297998	u	chr8.4	.	45014161	45015132	MSTRG.156777.1	1	972	MSTRG.156777	.	0.0001	0.0001	0.0001	1.40533	4.37413	7.40665	2.27512e-05	-15.4237	4.69572e-05	0.01546	down	yes
113	u	10469	.	5890	6213	MSTRG.54.1	1	324	MSTRG.54	.	0.0001	0.0001	0.0001	175.065	0.0001	19.7834	1.53966e-06	-19.309	5.21601e-05	0.0165889	down	yes
154927	u	chr4.3	+	72191299	72197399	MSTRG.81610.1	2	316	MSTRG.81610	.	0.0001	0.0001	0.0001	0.0001	55.1091	78.2935	2.24883e-06	-18.7624	5.70794e-05	0.0174424	down	yes
173215	u	chr5.1	.	59278909	59279487	MSTRG.91222.1	1	579	MSTRG.91222	.	6.59955	6.41228	5.42288	0.0001	0.0001	0.0001	61449	15.9071	5.91323e-05	0.0178356	up	yes
39106	o	chr1.3	-	65390307	65398962	MSTRG.20610.3	2	1297	MSTRG.20610	MS.gene001644	0.0001	0.0001	0.0001	55.1564	4.13985	0.0001	5.05933e-06	-17.5926	6.01836e-05	0.0179984	down	yes
119176	u	chr3.4	.	49111128	49111349	MSTRG.62685.1	1	222	MSTRG.62685	.	0.0001	70.9774	101.615	0.0001	0.0001	0.0001	575307	19.134	6.32282e-05	0.0185218	up	yes
178735	u	chr5.2	+	23091813	23095480	MSTRG.94122.1	2	403	MSTRG.94122	.	0.0001	0.0001	0.0001	20.0851	3.53876	6.55443	9.94094e-06	-16.6182	6.87641e-05	0.0192504	down	yes
163493	u	chr4.4	.	47528148	47529573	MSTRG.86252.1	1	1426	MSTRG.86252	.	0.0001	13.8717	11.6419	0.0001	0.0001	0.0001	85045.7	16.376	7.00085e-05	0.0194244	up	yes
48565	u	chr1.4	.	67967616	67967888	MSTRG.25624.1	1	273	MSTRG.25624	.	0.0001	0.0001	0.0001	4.73399	13.5025	22.3423	7.39304e-06	-17.0454	7.94359e-05	0.0214049	down	yes
143435	u	chr4.2	.	56002357	56002856	MSTRG.75716.1	1	500	MSTRG.75716	.	0.335678	14.3047	17.436	0.0001	0.0001	0.0001	106921	16.7062	8.33449e-05	0.0220765	up	yes
6153	u	41697	.	12878	13272	MSTRG.3375.1	1	395	MSTRG.3375	.	7.31261	10.5538	7.10624	0.0001	0.0001	0.0001	83242.1	16.345	8.77183e-05	0.0228488	up	yes
204980	u	chr6.1	-	51786631	51830798	MSTRG.107635.1	2	252	MSTRG.107635	.	13.5355	16.7697	9.14979	0.0001	0.0001	0.0001	131517	17.0049	8.77268e-05	0.0228488	up	yes
249492	i	chr7.3	.	35957745	35958251	MSTRG.131549.1	1	507	MSTRG.131549	MS.gene94703	5.45518	11.2598	3.81122	0.0001	0.0001	0.0001	68420.7	16.0621	9.06928e-05	0.023361	up	yes
69626	i	chr2.3	.	11809384	11809616	MSTRG.36622.1	1	233	MSTRG.36622	MS.gene029025	0.0001	0.0001	0.0001	7.85656	17.5783	17.5296	6.98252e-06	-17.1278	9.4237e-05	0.0240332	down	yes
271849	u	chr8.1	.	75574031	75574783	MSTRG.143176.1	1	753	MSTRG.143176	.	3.2786	5.42289	4.21783	0.0001	0.0001	0.0001	43064.4	15.3942	9.43304e-05	0.0240332	up	yes
280023	u	chr8.2	.	59463173	59463426	MSTRG.147373.1	1	254	MSTRG.147373	.	7.65057	16.6386	14.3584	0.0001	0.0001	0.0001	128825	16.9751	9.63408e-05	0.0244602	up	yes
129828	u	chr4.1	-	26052742	26056481	MSTRG.68442.1	3	895	MSTRG.68442	.	0.0001	0.0001	0.0001	2.53752	1.42601	8.48273	2.41036e-05	-15.3404	9.87067e-05	0.0246775	down	yes
51480	u	chr1.4	.	87482581	87484616	MSTRG.27177.1	1	2036	MSTRG.27177	.	0.0001	8.79265	6.78015	0.0001	0.0001	0.0001	51909.7	15.6637	0.000100545	0.0249171	up	yes
68209	u	chr2.3	-	1596690	1599695	MSTRG.35857.1	3	955	MSTRG.35857	.	4.79443	2.31491	3.10483	0.0001	0.0001	0.0001	34047.2	15.0552	0.000101351	0.0249171	up	yes
260472	u	chr7.4	.	54555931	54556583	MSTRG.137203.1	1	653	MSTRG.137203	.	0.0001	0.0001	0.0001	0.0001	13.0877	39.8911	5.66263e-06	-17.4301	0.000104761	0.0253768	down	yes
5989	u	41431	.	8721	8991	MSTRG.3234.1	1	271	MSTRG.3234	.	0.0001	0.0001	0.0001	40.9065	0.0001	75.0108	2.58805e-06	-18.5597	0.000105125	0.0253993	down	yes
24105	u	chr1.2	-	24416972	24417796	MSTRG.12655.1	1	825	MSTRG.12655	.	0.0001	0.063944	0.0001	9.06235	4.77205	4.74179	0.00345302	-8.17793	0.000108622	0.0256646	down	yes
71592	i	chr2.3	.	30688200	30689012	MSTRG.37630.1	1	813	MSTRG.37630	MS.gene045713	0.0001	0.0001	0.0001	4.19972	4.82895	2.6735	2.56363e-05	-15.2515	0.000113351	0.0264335	down	yes
187709	x	chr5.3	-	24063304	24065095	MSTRG.98746.3	3	645	MSTRG.98746	MS.gene45098	4.32082	7.66281	3.07908	0.0001	0.0001	0.0001	50209	15.6157	0.000113646	0.0264335	up	yes
260703	o	chr7.4	-	58618106	58991567	MSTRG.137334.1	2	431	MSTRG.137334	MS.gene069077	0.0001	28.3683	41.2305	0.0001	0.0001	0.0001	231996	17.8237	0.000114407	0.0264786	up	yes
201651	u	chr6.1	-	1239545	1241184	MSTRG.105995.2	2	752	MSTRG.105995	.	1.61773	3.23767	8.78823	0.0001	0.0001	0.0001	45478.8	15.4729	0.000114723	0.0264862	up	yes
269532	u	chr8.1	.	51456426	51456827	MSTRG.142017.1	1	402	MSTRG.142017	.	0.0001	0.0001	0.0001	11.8857	5.96092	6.05353	1.25522e-05	-16.2817	0.00011814	0.0271096	down	yes
216571	u	chr6.3	-	20332618	20333248	MSTRG.114011.2	2	584	MSTRG.114011	.	0.0001	0.0001	0.0001	2.98623	0.0001	72.113	3.99471e-06	-17.9335	0.000133029	0.0290622	down	yes
124164	o	chr3.4	-	89622307	89635893	MSTRG.65371.1	2	536	MSTRG.65371	MS.gene012974	21.2518	0.0001	33.3514	0.0001	0.0001	0.0001	182011	17.4737	0.000133901	0.0291845	up	yes
24323	x	chr1.2	-	26524402	26524734	MSTRG.12769.1	2	249	MSTRG.12769	MS.gene67156	0.0001	0.0001	0.0001	0.0001	89.0582	34.2795	2.43234e-06	-18.6492	0.000136958	0.0295987	down	yes
21509	u	chr1.2	-	2478959	2480540	MSTRG.11203.1	2	1457	MSTRG.11203	.	0.0001	0.0001	0.0001	0.0001	11.2438	8.68529	1.50533e-05	-16.0196	0.00013824	0.0297146	down	yes
130561	o	chr4.1	+	30894987	30902595	MSTRG.68865.1	2	836	MSTRG.68865	MS.gene003600	0.0001	0.0001	0.0001	0.0001	7.73846	29.0072	8.1642e-06	-16.9023	0.000146737	0.0310335	down	yes
279262	o	chr8.2	-	49293021	49354511	MSTRG.147012.6	3	3505	MSTRG.147012	MS.gene032390	4.26421	4.20709	0.0001	0.0001	0.0001	0.0001	28238	14.7854	0.000147263	0.0310335	up	yes
161939	j	chr4.4	+	34920675	34923833	MSTRG.85437.6	4	2341	MSTRG.85437	MS.gene057658	0.0001	3.68055	8.01091	0.0001	0.0001	0.0001	38971.8	15.2501	0.000152807	0.0314021	up	yes
96966	u	chr3.2	-	17884861	17885235	MSTRG.51102.1	1	375	MSTRG.51102	.	1.75854	13.5875	10.8503	0.0001	0.0001	0.0001	87321.3	16.414	0.000174746	0.0345439	up	yes
209787	u	chr6.2	-	22399135	22450304	MSTRG.110357.3	5	725	MSTRG.110357	.	24.2815	15.2988	39.348	17.0208	3286.27	3646.55	0.0113569	-6.46029	0.000183419	0.0354866	down	yes
194675	u	chr5.4	+	12280364	12281846	MSTRG.102351.3	2	1036	MSTRG.102351	.	0.0001	11.0221	12.616	0.0001	0.0001	0.0001	78793.8	16.2658	0.000184154	0.035503	up	yes
186595	u	chr5.3	+	14525351	14526972	MSTRG.98192.3	5	311	MSTRG.98192	.	0.0001	0.0001	0.0001	7.69183	10.9692	7.71556	1.13737e-05	-16.4239	0.000206907	0.0383098	down	yes
263693	u	chr8.1	.	2529721	2530863	MSTRG.138863.1	1	1143	MSTRG.138863	.	7.29224	0.0001	14.3291	0.0001	0.0001	0.0001	72071.6	16.1371	0.000207758	0.0383792	up	yes
220742	o	chr6.3	+	79872496	79873900	MSTRG.116309.1	3	908	MSTRG.116309	MS.gene61412	1.1074	7.12444	2.16862	0.0001	0.0001	0.0001	34668.2	15.0813	0.000209895	0.0385969	up	yes
289553	o	chr8.3	+	57036926	57132536	MSTRG.152446.2	2	665	MSTRG.152446	MS.gene88410	0.844872	11.9068	2.99228	0.0001	0.0001	0.0001	52479.8	15.6795	0.000211867	0.0387675	up	yes
265813	u	chr8.1	.	17672715	17673412	MSTRG.140017.1	1	698	MSTRG.140017	.	33.3643	4.39427	34.7656	0.686688	0.280779	0.0001	74.9552	6.22796	0.000221463	0.0398219	up	yes
280566	u	chr8.2	.	65000993	65002747	MSTRG.147659.1	1	1755	MSTRG.147659	.	0.0001	0.0001	0.0001	4.75949	9.76289	0.0001	2.06576e-05	-15.563	0.000222567	0.0398673	down	yes
62592	o	chr2.2	+	19492934	19520217	MSTRG.32938.1	3	219	MSTRG.32938	MS.gene039315	0.0001	0.0001	0.0001	48.3332	62.7767	0.0001	2.70003e-06	-18.4986	0.000232407	0.0410014	down	yes
54134	j	chr2.1	+	19646676	19647141	MSTRG.28548.2	2	394	MSTRG.28548	MS.gene031352	0.0001	0.0001	0.0001	7.4402	5.45427	7.1301	1.49816e-05	-16.0264	0.000236024	0.0414052	down	yes
24088	u	chr1.2	.	24335850	24337380	MSTRG.12643.1	1	1531	MSTRG.12643	.	0.0001	0.0001	0.0001	5.62463	0.48526	0.790051	4.34787e-05	-14.4893	0.000245275	0.0423136	down	yes
128231	u	chr4.1	.	15857759	15858993	MSTRG.67526.1	1	1235	MSTRG.67526	.	0.0001	0.0001	0.0001	3.31765	1.43216	1.78238	4.59263e-05	-14.4103	0.000254456	0.0432285	down	yes
217476	o	chr6.3	+	32862272	33296197	MSTRG.114723.1	2	242	MSTRG.114723	MS.gene08016	0.0001	0.0001	0.0001	5.46868	16.6512	10.928	9.07776e-06	-16.7492	0.000265213	0.0443414	down	yes
90014	u	chr3.1	.	56128984	56129328	MSTRG.47250.1	1	345	MSTRG.47250	.	44.5659	22.8839	0.0001	0.0001	0.0001	0.0001	224833	17.7785	0.000279187	0.0457177	up	yes
94459	u	chr3.1	-	86609551	86610907	MSTRG.49666.1	2	1091	MSTRG.49666	.	1.07006	3.14451	2.94276	0.0001	0.0001	0.0001	23857.7	14.5422	0.00028367	0.0462091	up	yes
130562	o	chr4.1	+	30894987	30902595	MSTRG.68865.2	2	836	MSTRG.68865	MS.gene003600	0.0001	0.0001	0.0001	0.0001	3.3434	27.6901	9.66693e-06	-16.6585	0.000288716	0.0465656	down	yes
112467	j	chr3.3	-	76221052	76230539	MSTRG.59150.1	5	537	MSTRG.59150	MS.gene06718	3.16685	5.26895	5.4222	0.0001	0.0001	0.0001	46193.3	15.4954	0.000294887	0.0469724	up	yes
30388	j	chr1.2	+	77832646	77834043	MSTRG.15861.2	2	645	MSTRG.15861	MS.gene93871	0.0001	0.0001	0.0001	4.03565	2.80628	4.7255	2.59349e-05	-15.2347	0.000301457	0.0478559	down	yes
2591	u	23879	.	157192	158476	MSTRG.1161.1	1	1285	MSTRG.1161	.	0.0001	0.0001	0.0001	0.0001	4.71991	12.1739	1.77579e-05	-15.7812	0.000304655	0.0481185	down	yes
7405	u	43357	.	165412	166265	MSTRG.4026.1	1	854	MSTRG.4026	.	0.0001	0.0001	0.0001	5.62382	1.92476	1.80988	3.20566e-05	-14.929	0.000311173	0.0484927	down	yes
32084	u	chr1.3	-	2876993	2893815	MSTRG.16824.6	4	2323	MSTRG.16824	.	0.0001	0.0001	0.0001	0.0001	9.46653	1.28114	2.79128e-05	-15.1287	0.000314644	0.0487089	down	yes
6958	u	42898	.	12739	12950	MSTRG.3798.1	1	212	MSTRG.3798	.	11.9366	11.2298	11.0329	0.0001	0.0001	0.0001	113998	16.7986	0.00032116	0.0493906	up	yes
138850	u	chr4.2	.	18136074	18137476	MSTRG.73273.1	1	1403	MSTRG.73273	.	0.638699	2.95414	2.00561	0.0001	0.0001	0.0001	18661.5	14.1878	0.00032259	0.0494477	up	yes
190601	u	chr5.3	.	60394799	60396241	MSTRG.100225.1	1	1443	MSTRG.100225	.	0.048257	4.54353	3.36091	0.0001	0.0001	0.0001	26509	14.6942	0.000338471	0.0512935	up	yes
176273	u	chr5.2	.	3218599	3218981	MSTRG.92821.1	1	383	MSTRG.92821	.	0.0001	0.0001	0.0001	1.12036	19.2889	4.63488	1.19789e-05	-16.3491	0.000344272	0.0517532	down	yes
203478	u	chr6.1	.	23004262	23004528	MSTRG.106879.1	1	267	MSTRG.106879	.	0.0001	53.9137	21.8262	0.0001	0.0001	0.0001	252467	17.9457	0.000348403	0.0520953	up	yes
280569	u	chr8.2	.	65009476	65010307	MSTRG.147658.1	1	832	MSTRG.147658	.	0.0001	0.0001	0.0001	8.41131	16.9681	0.0001	1.18206e-05	-16.3683	0.000353057	0.0523722	down	yes
186201	u	chr5.3	-	11789781	11790851	MSTRG.97973.2	3	561	MSTRG.97973	.	22.4904	14.8546	0.0001	0.0001	0.0001	0.0001	124484	16.9256	0.000353518	0.0523722	up	yes
271874	j	chr8.1	+	75752273	75754398	MSTRG.143200.4	2	1916	MSTRG.143200	MS.gene060496	0.224692	0.259299	0.0001	1.62644	11.7447	17.59	0.0156355	-5.99903	0.000354221	0.0523722	down	yes
187838	u	chr5.3	.	25124356	25125711	MSTRG.98815.1	1	1356	MSTRG.98815	.	3.41565	1.74443	0.689339	0.0001	0.0001	0.0001	19498.1	14.251	0.000355674	0.0523722	up	yes
209068	x	chr6.2	-	14383409	14387776	MSTRG.109985.1	2	361	MSTRG.109985	MS.gene074248	1.50026	2.2842	3.32062	1.20051	242.943	272.003	0.0137656	-6.18279	0.000356232	0.0523722	down	yes
221387	i	chr6.4	.	963093	964039	MSTRG.116641.1	1	947	MSTRG.116641	MS.gene74407	0.0001	0.0001	0.0001	0.0001	4.98154	16.9477	1.36803e-05	-16.1575	0.000358683	0.0526499	down	yes
22429	u	chr1.2	.	8845520	8846612	MSTRG.11750.1	1	1093	MSTRG.11750	.	0.0001	0.0001	0.113358	6.66657	2.40509	7.58458	0.00681775	-7.19649	0.00036129	0.0528601	down	yes
133914	u	chr4.1	+	69586844	69595265	MSTRG.70629.1	2	1319	MSTRG.70629	.	0.0001	0.0001	0.0001	3.09352	1.54326	1.00324	5.31914e-05	-14.1984	0.000374202	0.0535819	down	yes
213216	x	chr6.2	+	77578082	77598851	MSTRG.112200.1	2	312	MSTRG.112200	MS.gene05222	0.0001	0.0001	0.0001	4.2315	6.42188	12.758	1.28143e-05	-16.2519	0.000379253	0.0539746	down	yes
137381	u	chr4.2	+	8449796	8450816	MSTRG.72508.1	2	881	MSTRG.72508	.	4.47377	0.193614	6.09361	0.0001	0.0001	0.0001	35870	15.1305	0.000388393	0.0547752	up	yes
67199	u	chr2.2	.	68903703	68904114	MSTRG.35309.1	1	412	MSTRG.35309	.	0.0001	0.0001	0.0001	3.0403	8.41566	5.98113	1.72047e-05	-15.8268	0.000396625	0.0555397	down	yes
220303	u	chr6.3	.	75206179	75207324	MSTRG.116036.1	1	1146	MSTRG.116036	.	1.6614	2.22045	2.09877	0.0001	0.0001	0.0001	19935.4	14.283	0.000406331	0.0559262	up	yes
105915	j	chr3.3	-	8141294	8143350	MSTRG.55691.1	3	1499	MSTRG.55691	MS.gene069283	0.0001	0.0001	0.0001	0.0001	6.58802	5.67966	2.44543e-05	-15.3196	0.000414344	0.056641	down	yes
32091	u	chr1.3	-	2882610	2902044	MSTRG.16824.11	5	3948	MSTRG.16824	.	0.0001	0.0001	0.0001	0.830709	0.04709	1.50955	0.000125663	-12.9582	0.000419729	0.0570208	down	yes
202634	u	chr6.1	-	10896169	10896839	MSTRG.106484.2	2	624	MSTRG.106484	.	0.0001	0.0001	0.0001	17.8237	13.0902	0.0001	9.70436e-06	-16.6529	0.000421922	0.0570208	down	yes
242405	u	chr7.2	.	69725209	69725634	MSTRG.127735.1	1	426	MSTRG.127735	.	0.0001	0.0001	0.0001	6.93049	3.90722	5.39766	1.84782e-05	-15.7238	0.000422002	0.0570208	down	yes
205917	u	chr6.1	+	65260352	65261809	MSTRG.108192.1	2	515	MSTRG.108192	.	3.43237	5.56959	4.13217	0.0001	0.0001	0.0001	43780.4	15.418	0.000436521	0.0581286	up	yes
194676	u	chr5.4	.	12282458	12282693	MSTRG.102349.1	1	236	MSTRG.102349	.	10.6703	12.4165	5.80109	0.0001	0.0001	0.0001	96292.7	16.5551	0.000453923	0.059695	up	yes
205193	u	chr6.1	-	55944809	55952577	MSTRG.107743.1	2	513	MSTRG.107743	.	0.0001	0.0001	0.236098	0.55407	18.1107	33.271	0.00454982	-7.77998	0.000466643	0.0606667	down	yes
150753	o	chr4.3	+	27641919	27659996	MSTRG.79522.1	2	679	MSTRG.79522	MS.gene059500	4.21501	2.98328	2.60477	0.0001	0.0001	0.0001	32676.9	14.996	0.000473975	0.0613823	up	yes
240483	u	chr7.2	+	43027428	43034112	MSTRG.126695.1	2	425	MSTRG.126695	.	0.0001	0.0001	0.0001	1.75283	4.78673	10.6526	1.74498e-05	-15.8064	0.000485399	0.0621729	down	yes
54789	u	chr2.1	.	25962986	25964047	MSTRG.28856.1	1	1062	MSTRG.28856	.	0.605262	3.13657	3.00263	0.0001	0.0001	0.0001	22481.5	14.4565	0.000496883	0.0632971	up	yes
222982	u	chr6.4	.	25413106	25413363	MSTRG.117441.1	1	258	MSTRG.117441	.	0.0001	0.0001	0.0001	17.1598	3.7335	6.94736	1.07756e-05	-16.5019	0.000501205	0.0635016	down	yes
2395	u	23447	+	101046	103172	MSTRG.1064.1	2	1885	MSTRG.1064	.	4.18564	5.28625	0.0001	0.0001	0.0001	0.0001	31573.3	14.9464	0.000504572	0.0636694	up	yes
116181	u	chr3.4	.	7566743	7567259	MSTRG.61103.1	1	517	MSTRG.61103	.	4.03383	4.56833	3.86922	0.0001	0.0001	0.0001	41571.3	15.3433	0.000507639	0.06397	up	yes
97818	u	chr3.2	.	29808443	29808691	MSTRG.51478.1	1	249	MSTRG.51478	.	0.0001	0.0001	0.0001	11.9576	2.21054	15.4987	1.01123e-05	-16.5935	0.000510167	0.0641158	down	yes
49223	u	chr1.4	.	72055001	72055979	MSTRG.25953.1	1	979	MSTRG.25953	.	6.35584	1.52647	0.562437	0.0001	0.0001	0.0001	28149.2	14.7808	0.000515326	0.0644178	up	yes
289172	i	chr8.3	.	52839220	52839680	MSTRG.152264.1	1	461	MSTRG.152264	MS.gene36088	0.0001	0.0001	0.0001	0.838226	6.25934	9.68245	1.78784e-05	-15.7714	0.000519494	0.0646794	down	yes
185358	i	chr5.3	+	5325337	5325807	MSTRG.97517.1	2	363	MSTRG.97517	MS.gene025787	0.0001	0.0001	0.0001	0.0001	27.4546	18.8736	6.47553e-06	-17.2366	0.000522096	0.0648308	down	yes
18992	u	chr1.1	.	69117882	69118141	MSTRG.9857.1	1	260	MSTRG.9857	.	0.0001	18.8187	43.9462	0.0001	0.0001	0.0001	209217	17.6746	0.000525495	0.0651662	up	yes
110052	u	chr3.3	+	58938265	58939065	MSTRG.57912.1	2	461	MSTRG.57912	.	0.0001	0.0001	0.0001	6.70247	4.52139	3.11283	2.09253e-05	-15.5444	0.000530353	0.0655947	down	yes
203993	i	chr6.1	.	31358810	31359318	MSTRG.107152.1	1	509	MSTRG.107152	MS.gene83952	7.1608	2.65808	3.30615	0.0001	0.0001	0.0001	43750.1	15.417	0.000543837	0.0668842	up	yes
71083	u	chr2.3	+	25595859	25596441	MSTRG.37352.1	1	583	MSTRG.37352	.	0.0001	0.0001	0.0001	5.57384	2.07147	3.67161	2.6509e-05	-15.2032	0.000544543	0.0668842	down	yes
10590	i	6950	.	25975	26226	MSTRG.5463.1	1	252	MSTRG.5463	MS.gene018887	0.0001	0.0001	0.0001	9.54543	11.4699	5.02389	1.15211e-05	-16.4054	0.000558151	0.0677698	down	yes
66163	u	chr2.2	.	61103157	61103683	MSTRG.34741.1	1	527	MSTRG.34741	.	0.0001	0.0001	0.0001	2.93101	7.72623	2.21833	2.32999e-05	-15.3893	0.000564802	0.0682309	down	yes
172104	u	chr5.1	.	48639703	48640375	MSTRG.90647.1	1	673	MSTRG.90647	.	13.6775	11.557	0.0001	0.0001	0.0001	0.0001	84115.2	16.3601	0.000571025	0.0686832	up	yes
252471	i	chr7.3	.	75669523	75670021	MSTRG.133030.1	1	499	MSTRG.133030	MS.gene062459	11.6089	22.8761	0.0001	0.0001	0.0001	0.0001	114950	16.8107	0.000577359	0.0687704	up	yes
145321	u	chr4.2	.	81568984	81570874	MSTRG.76649.1	1	1891	MSTRG.76649	.	0.0001	0.0001	0.0001	0.0001	5.84871	2.8537	3.44728e-05	-14.8242	0.000582653	0.0692247	down	yes
116904	u	chr3.4	.	14661994	14662282	MSTRG.61510.1	1	289	MSTRG.61510	.	7.40707	7.31701	6.85957	0.0001	0.0001	0.0001	71945.5	16.1346	0.000586196	0.0694691	up	yes
132633	u	chr4.1	-	51065715	51066650	MSTRG.69990.1	2	842	MSTRG.69990	.	0.507009	3.45059	4.60568	0.0001	0.0001	0.0001	28544.3	14.8009	0.000588152	0.0696126	up	yes
194419	x	chr5.4	-	10472497	10474503	MSTRG.102218.1	2	788	MSTRG.102218	MS.gene010357	3.72262	2.5446	1.807	0.0001	0.0001	0.0001	26914.1	14.7161	0.000590553	0.0697787	up	yes
118077	u	chr3.4	.	31083942	31084609	MSTRG.62126.1	1	668	MSTRG.62126	.	0.0001	0.0001	0.0001	0.0001	32.302	1.45978	8.88576e-06	-16.7801	0.000591491	0.0697787	down	yes
204962	u	chr6.1	.	51520463	51521528	MSTRG.107611.1	1	1066	MSTRG.107611	.	0.033499	0.0001	0.0001	2.21171	3.59942	2.08857	0.00426586	-7.87295	0.000591794	0.0697787	down	yes
132876	u	chr4.1	-	55883489	55900317	MSTRG.70113.1	2	588	MSTRG.70113	.	0.0001	0.0001	0.0001	0.0001	6.7367	21.5236	1.06156e-05	-16.5235	0.000603943	0.0709877	down	yes
212988	u	chr6.2	-	75296783	75300191	MSTRG.112058.1	3	829	MSTRG.112058	.	0.0001	0.0001	0.0001	0.269666	3.3349	6.21258	3.05588e-05	-14.9981	0.000606612	0.071167	down	yes
95842	u	chr3.2	.	4117320	4118237	MSTRG.50395.1	1	918	MSTRG.50395	.	0.0001	0.0001	0.0001	1.22429	4.94315	1.31435	4.00974e-05	-14.6061	0.000611808	0.071416	down	yes
44932	i	chr1.4	.	31189407	31190088	MSTRG.23786.1	1	682	MSTRG.23786	MS.gene064969	0.0001	0.0001	0.0001	1.95708	4.28605	2.94873	3.26376e-05	-14.9031	0.000614094	0.0714174	down	yes
170613	u	chr5.1	+	27378282	27379733	MSTRG.89916.1	3	453	MSTRG.89916	.	0.0001	0.0001	0.0001	3.33952	3.62218	6.78724	2.18199e-05	-15.484	0.000627277	0.0722319	down	yes
118825	u	chr3.4	+	44711499	44712820	MSTRG.62450.2	2	1163	MSTRG.62450	.	0.0001	0.075254	0.0001	2.38153	8.33983	1.58055	0.00613352	-7.34907	0.000635303	0.0727084	down	yes
209796	u	chr6.2	+	22486133	22487563	MSTRG.110362.1	2	377	MSTRG.110362	.	0.184709	0.0001	0.0001	3.50543	13.0722	13.0592	0.00623917	-7.32443	0.000652225	0.0737425	down	yes
117906	u	chr3.4	-	27827811	27828369	MSTRG.62045.1	2	327	MSTRG.62045	.	0.0001	0.0001	0.0001	10.1997	3.10155	6.25386	1.53413e-05	-15.9922	0.000658078	0.0743144	down	yes
78352	u	chr2.4	.	13837548	13837780	MSTRG.41196.1	1	233	MSTRG.41196	.	28.0805	23.0148	22.2996	0.0001	0.841134	0.219132	69.2166	6.11305	0.000671634	0.0754805	up	yes
284533	u	chr8.3	-	12158937	12161236	MSTRG.149735.3	2	451	MSTRG.149735	.	3.46395	5.84835	4.15641	0.0001	0.0001	0.0001	44895.7	15.4543	0.000672719	0.0755117	up	yes
270771	j	chr8.1	+	65622486	65623467	MSTRG.142621.1	2	221	MSTRG.142621	MS.gene056191	0.989624	1.54734	0.792468	102.917	0.0001	354.089	0.00728532	-7.10079	0.000719738	0.0788269	down	yes
237816	u	chr7.2	+	20016153	20016741	MSTRG.125305.1	1	589	MSTRG.125305	.	0.286977	20.1318	5.98878	0.077771	0.0001	0.0001	338.684	8.4038	0.000719966	0.0788269	up	yes
6807	u	42767	.	15694	16605	MSTRG.3723.1	1	912	MSTRG.3723	.	4.65241	5.81228	4.71297	0.157979	0.0001	0.0001	95.9524	6.58425	0.000725654	0.0789882	up	yes
265437	u	chr8.1	-	15092214	15096226	MSTRG.139786.1	4	616	MSTRG.139786	.	14.2653	0.0001	9.62246	0.0001	0.0001	0.0001	79626.1	16.281	0.000734832	0.0797088	up	yes
104090	u	chr3.2	.	86478035	86478342	MSTRG.54725.1	1	308	MSTRG.54725	.	4.10052	6.82823	7.9818	0.0001	0.0001	0.0001	63035.2	15.9439	0.000762775	0.0815105	up	yes
190585	u	chr5.3	.	60233538	60234981	MSTRG.100215.1	1	1444	MSTRG.100215	.	0.047812	5.27409	1.25355	0.0001	0.0001	0.0001	21918.2	14.4198	0.000773342	0.0823574	up	yes
35724	u	chr1.3	.	35909156	35909456	MSTRG.18809.1	1	301	MSTRG.18809	.	12.6549	27.1952	20.9696	0.0001	0.641875	0.0001	94.7236	6.56565	0.000774747	0.0824131	up	yes
223278	u	chr6.4	.	31280872	31282734	MSTRG.117584.1	1	1863	MSTRG.117584	.	0.0001	0.0001	0.0001	2.66419	5.38003	0.0001	3.72934e-05	-14.7107	0.000794961	0.084139	down	yes
216317	u	chr6.3	.	17487451	17488190	MSTRG.113896.1	1	740	MSTRG.113896	.	0.152815	0.215908	0.0001	4.35398	11.9372	5.91529	0.0166088	-5.91191	0.000798297	0.0842474	down	yes
46438	o	chr1.4	+	50463794	50575421	MSTRG.24508.1	2	508	MSTRG.24508	MS.gene72328	0.0001	0.0001	0.0001	0.37091	5.07565	9.32498	2.03093e-05	-15.5875	0.000817856	0.0857239	down	yes
8280	u	51273	.	295553	296015	MSTRG.4404.1	1	463	MSTRG.4404	.	0.0001	0.0001	0.0001	6.63647	3.67829	2.61653	2.31995e-05	-15.3955	0.000826185	0.0858342	down	yes
189564	o	chr5.3	-	51320239	51322827	MSTRG.99714.1	2	428	MSTRG.99714	MS.gene043886	0.0001	0.0001	0.0001	5.65863	3.09087	4.73228	2.22523e-05	-15.4557	0.000833811	0.0861577	down	yes
152985	u	chr4.3	+	46288760	46291000	MSTRG.80682.1	2	556	MSTRG.80682	.	0.0001	0.0001	0.0001	3.49303	1.45641	5.88477	2.76901e-05	-15.1403	0.000843367	0.0868473	down	yes
38851	u	chr1.3	.	63188788	63189145	MSTRG.20451.1	1	358	MSTRG.20451	.	0.0001	0.0001	0.0001	7.97459	4.45719	3.84169	1.84349e-05	-15.7272	0.000853516	0.0874111	down	yes
300097	o	chr8.4	+	69153197	69192523	MSTRG.157824.1	2	252	MSTRG.157824	MS.gene066953	0.0001	0.0001	0.0001	0.21906	25.7067	10.7633	8.17682e-06	-16.9	0.000878862	0.0883756	down	yes
108276	u	chr3.3	.	42581671	42582712	MSTRG.56940.1	1	1042	MSTRG.56940	.	0.0001	0.0001	0.0001	8.77558	5.04561	0.0001	2.17057e-05	-15.4916	0.000889373	0.0891927	down	yes
231362	u	chr7.1	.	42183621	42183981	MSTRG.121936.1	1	361	MSTRG.121936	.	0.0001	0.0001	0.0001	5.64601	6.82562	3.36654	1.89416e-05	-15.6881	0.000896186	0.0895008	down	yes
279493	u	chr8.2	.	53137323	53137890	MSTRG.147099.1	1	568	MSTRG.147099	.	0.0001	3.99722	20.4136	0.0001	0.0001	0.0001	81369.6	16.3122	0.000896894	0.0895008	up	yes
183940	u	chr5.2	.	78778038	78778709	MSTRG.96788.1	1	672	MSTRG.96788	.	0.177135	6.97875	4.37235	0.0001	0.0001	0.0001	38427.4	15.2298	0.00089884	0.089504	up	yes
198460	u	chr5.4	-	53455251	53456896	MSTRG.104311.1	1	1646	MSTRG.104311	.	0.025492	5.68168	4.58956	0.025034	0.0001	0.0001	408.05	8.6726	0.000903071	0.0896389	up	yes
19554	j	chr1.1	+	72469213	72469910	MSTRG.10145.1	3	387	MSTRG.10145	MS.gene006292	0.0001	0.0001	0.0001	4.78621	4.79871	4.90295	2.0707e-05	-15.5595	0.000904765	0.0897118	down	yes
222950	u	chr6.4	-	24963349	24964400	MSTRG.117420.1	2	691	MSTRG.117420	.	0.0001	0.0001	0.0001	3.47816	1.83926	2.91605	3.64366e-05	-14.7443	0.000907972	0.0899344	down	yes
88742	u	chr3.1	+	44359052	44360834	MSTRG.46599.2	2	335	MSTRG.46599	.	0.0001	0.0001	0.0001	0.0001	15.1457	24.9337	7.48513e-06	-17.0275	0.000914309	0.0903706	down	yes
220463	o	chr6.3	-	76662666	76931695	MSTRG.116181.1	2	400	MSTRG.116181	MS.gene51261	2.23488	5.87341	6.06263	0.0001	0.0001	0.0001	47236.4	15.5276	0.000929434	0.0913408	up	yes
244361	u	chr7.2	.	92165938	92166758	MSTRG.128781.1	1	821	MSTRG.128781	.	0.0001	0.0001	0.0001	0.403434	2.69747	4.87142	3.76302e-05	-14.6978	0.000930644	0.0913408	down	yes
238193	u	chr7.2	-	22353234	22354017	MSTRG.125481.1	2	619	MSTRG.125481	.	0.0001	0.0001	0.0001	0.686727	2.43804	7.44141	2.83925e-05	-15.1041	0.000945168	0.0922506	down	yes
244454	u	chr7.2	.	93000707	93001491	MSTRG.128821.1	1	785	MSTRG.128821	.	0.0001	0.0001	0.0001	8.322	2.92777	0.097563	2.64379e-05	-15.207	0.000949266	0.0923613	down	yes
13956	u	chr1.1	.	23683953	23684223	MSTRG.7200.1	1	271	MSTRG.7200	.	0.0001	68.2751	56.1988	0.0001	0.0001	0.322412	385.832	8.59183	0.000954386	0.0927629	up	yes
2586	u	23879	.	144512	145332	MSTRG.1154.1	1	821	MSTRG.1154	.	0.0001	0.0001	0.0001	0.258464	1.56688	7.24512	3.30744e-05	-14.8839	0.000959286	0.092898	down	yes
139593	u	chr4.2	.	22793519	22794102	MSTRG.73670.1	1	584	MSTRG.73670	.	0.0001	0.0001	0.0001	0.883583	2.57404	7.25343	2.80084e-05	-15.1238	0.000977107	0.0938977	down	yes
123975	u	chr3.4	.	88237437	88237797	MSTRG.65263.1	1	361	MSTRG.65263	.	0.928209	12.9112	4.64455	0.0001	0.0001	0.0001	61613.3	15.911	0.000979926	0.0940719	up	yes
230369	u	chr7.1	.	30144997	30145463	MSTRG.121413.1	1	467	MSTRG.121413	.	3.23459	2.16678	6.49914	0.0001	0.0001	0.0001	39668.4	15.2757	0.00103499	0.0981258	up	yes
96883	i	chr3.2	.	16561678	16562067	MSTRG.50967.1	1	390	MSTRG.50967	MS.gene83794	0.0001	20.4584	11.6868	0.0001	0.0001	0.0001	107151	16.7093	0.00103662	0.0981258	up	yes
29624	u	chr1.2	-	73186950	73191228	MSTRG.15462.1	2	227	MSTRG.15462	.	1.26901	9.27336	17.2487	0.0001	0.0001	0.0001	92637	16.4993	0.0010417	0.0984855	up	yes
250223	u	chr7.3	-	44910876	44911134	MSTRG.131912.1	1	259	MSTRG.131912	.	0.0001	0.0001	0.0001	7.44931	5.61619	8.18942	1.41144e-05	-16.1125	0.00104404	0.0985177	down	yes
256458	u	chr7.4	.	16466674	16466982	MSTRG.135011.1	1	309	MSTRG.135011	.	7.64716	7.1718	3.26365	0.0001	0.0001	0.0001	60275.4	15.8793	0.001089	0.100992	up	yes
2121	u	21194	.	9696	10826	MSTRG.937.1	1	1131	MSTRG.937	.	0.0001	0.0001	0.0001	7.71325	4.03322	0.0001	2.55394e-05	-15.2569	0.00110004	0.101839	down	yes
210113	u	chr6.2	+	26352356	26353352	MSTRG.110512.1	2	482	MSTRG.110512	.	1.84356	4.53645	4.9861	0.0001	0.0001	0.0001	37887	15.2094	0.00110584	0.102072	up	yes
223268	u	chr6.4	.	30958149	30958664	MSTRG.117579.1	1	516	MSTRG.117579	.	0.0001	0.0001	0.0001	0.0001	6.43058	18.3872	1.20881e-05	-16.3361	0.00111705	0.102424	down	yes
300909	u	chr8.4	.	76106297	76107570	MSTRG.158303.1	1	1274	MSTRG.158303	.	0.0001	6.40063	3.10302	0.0001	0.0001	0.0001	31679.2	14.9512	0.00115124	0.103957	up	yes
130130	i	chr4.1	.	28157404	28157693	MSTRG.68617.1	1	290	MSTRG.68617	MS.gene003378	0.0001	0.0001	0.0001	3.40345	6.17094	9.15892	1.60142e-05	-15.9303	0.00115282	0.103957	down	yes
7384	u	43357	.	57219	58149	MSTRG.4010.1	1	931	MSTRG.4010	.	0.0001	0.0001	0.0001	1.42496	1.30564	3.04384	5.1953e-05	-14.2324	0.00117995	0.10578	down	yes
103864	u	chr3.2	.	84992775	84993996	MSTRG.54618.1	1	1222	MSTRG.54618	.	1.63849	1.48784	1.22912	0.0001	0.0001	0.0001	14518.2	13.8256	0.00119064	0.106229	up	yes
81827	u	chr2.4	.	52712277	52713311	MSTRG.42939.1	1	1035	MSTRG.42939	.	0.022427	0.0001	0.0001	2.3608	3.38022	1.17561	0.00327139	-8.25588	0.00119453	0.106314	down	yes
231984	u	chr7.1	.	50258509	50258766	MSTRG.122252.1	1	258	MSTRG.122252	.	0.0001	0.0001	0.0001	0.0001	30.8027	16.1622	6.38774e-06	-17.2563	0.00121816	0.107448	down	yes
297706	i	chr8.4	.	40402253	40402563	MSTRG.156684.1	1	311	MSTRG.156684	MS.gene65033	0.0001	0.0001	0.212883	11.0077	7.95763	9.10814	0.0075902	-7.04165	0.00123762	0.108455	down	yes
289723	i	chr8.3	.	58478015	58478259	MSTRG.152519.1	1	245	MSTRG.152519	MS.gene88506	12.6007	5.65179	4.20364	0.0001	0.0001	0.0001	74853.7	16.1918	0.00125168	0.109201	up	yes
279273	u	chr8.2	-	49360302	49361304	MSTRG.147022.1	2	980	MSTRG.147022	.	0.0001	10.3525	2.44028	0.0001	0.0001	0.0001	42643	15.38	0.00125968	0.109566	up	yes
285904	u	chr8.3	.	21211702	21212463	MSTRG.150494.1	1	762	MSTRG.150494	.	4.19239	1.5614	1.52608	0.0001	0.0001	0.0001	24266.2	14.5667	0.00126945	0.110109	up	yes
297102	i	chr8.4	.	35364105	35364412	MSTRG.156317.1	1	308	MSTRG.156317	MS.gene47472	0.0001	0.0001	0.0001	5.35151	6.14275	5.4915	1.76619e-05	-15.789	0.00127892	0.11052	down	yes
228467	u	chr7.1	.	16613637	16613904	MSTRG.120324.1	1	268	MSTRG.120324	.	0.0001	0.0001	0.0001	2.82604	9.45484	8.02844	1.47715e-05	-16.0468	0.00128175	0.110663	down	yes
259925	x	chr7.4	+	47184925	47185223	MSTRG.137001.1	2	256	MSTRG.137001	MS.gene47784	0.0001	14.0538	28.9485	0.0001	0.0001	0.0001	143341	17.1291	0.00132722	0.112883	up	yes
43928	u	chr1.4	.	19764691	19764999	MSTRG.23252.1	1	309	MSTRG.23252	.	0.0001	0.0001	0.0001	6.22639	7.99227	3.12397	1.72984e-05	-15.819	0.00132799	0.112883	down	yes
23645	i	chr1.2	.	19059922	19061875	MSTRG.12432.1	1	1954	MSTRG.12432	MS.gene040819	3.77055	5.31695	4.77394	0.070929	0.286552	0.0001	38.7645	5.27666	0.00135795	0.114287	up	yes
171220	u	chr5.1	+	32835115	32836208	MSTRG.90223.1	2	475	MSTRG.90223	.	0.0001	0.0001	0.0001	0.0001	17.5957	6.83093	1.22816e-05	-16.3131	0.00138357	0.115609	down	yes
278217	x	chr8.2	+	36933618	36954755	MSTRG.146481.1	2	254	MSTRG.146481	MS.gene65568	4.56424	16.3345	2.13366	0.0001	0.0001	0.0001	76774.8	16.2283	0.00138478	0.115609	up	yes
221374	u	chr6.4	-	829284	831633	MSTRG.116630.1	3	456	MSTRG.116630	.	0.0001	0.0001	0.0001	1.16745	1.7184	9.93247	2.3404e-05	-15.3829	0.00138555	0.115609	down	yes
224898	i	chr6.4	-	53825605	53829848	MSTRG.118470.1	2	1018	MSTRG.118470	MS.gene76127	3.86314	0.887651	0.858835	0.0001	0.0001	0.0001	18698.8	14.1907	0.0013896	0.115804	up	yes
204981	u	chr6.1	+	51817450	51873100	MSTRG.107636.1	2	286	MSTRG.107636	.	8.31405	5.45038	4.4084	0.0001	0.0001	0.0001	60576.1	15.8865	0.00140058	0.116098	up	yes
298493	u	chr8.4	.	51991809	51992061	MSTRG.157031.1	1	253	MSTRG.157031	.	7.008	30.8372	28.092	0.827901	0.0001	0.0001	79.6246	6.31514	0.00141025	0.116356	up	yes
88067	u	chr3.1	+	37479558	37481588	MSTRG.46266.1	2	977	MSTRG.46266	.	0.087842	0.027936	0.0001	3.2026	5.15252	1.24096	0.0120756	-6.37177	0.00141244	0.116356	down	yes
253846	o	chr7.3	-	89948831	90262389	MSTRG.133771.1	2	1117	MSTRG.133771	MS.gene80928	0.764665	5.4292	3.89423	0.0001	0.07404	0.0001	135.885	7.08624	0.00141365	0.116356	up	yes
274712	i	chr8.2	-	10213974	10214723	MSTRG.144642.3	1	750	MSTRG.144642	MS.gene26778	0.037298	0.0001	0.034995	1.74719	6.04354	2.47858	0.00704945	-7.14827	0.0014215	0.11649	down	yes
5541	u	40826	.	60347	60555	MSTRG.2838.1	1	209	MSTRG.2838	.	13.0711	2.09187	11.1197	0.0001	0.0001	0.0001	87608.6	16.4188	0.00142621	0.116773	up	yes
228116	o	chr7.1	-	14075912	14147852	MSTRG.120169.2	2	293	MSTRG.120169	MS.gene018004	0.0001	0.0001	0.219639	0.0001	72.5393	14.2096	0.0025342	-8.62426	0.00142963	0.116848	down	yes
109728	u	chr3.3	.	55867044	55868318	MSTRG.57745.1	1	1275	MSTRG.57745	.	0.0001	0.161157	0.0001	12.2254	2.38162	1.13424	0.0102506	-6.60815	0.00144594	0.11746	down	yes
263092	u	chr7.4	.	92438112	92439032	MSTRG.138556.1	1	921	MSTRG.138556	.	0.0001	0.0001	0.0001	3.42796	9.38562	0.0001	2.34125e-05	-15.3824	0.00147175	0.118478	down	yes
17004	u	chr1.1	.	56436915	56437307	MSTRG.8757.1	1	393	MSTRG.8757	.	0.0001	0.258535	0.0001	7.8143	22.1562	1.8033	0.00814302	-6.94022	0.00147414	0.118478	down	yes
95459	u	chr3.2	.	488210	488588	MSTRG.50196.1	1	379	MSTRG.50196	.	0.0001	0.0001	0.0001	6.45271	3.99292	3.15534	2.20572e-05	-15.4684	0.00147617	0.118478	down	yes
135083	j	chr4.1	+	80999289	81001341	MSTRG.71247.2	6	489	MSTRG.71247	MS.gene037435	0.0001	0.0001	0.0001	2.5685	1.53567	6.78224	2.75573e-05	-15.1472	0.00150013	0.119681	down	yes
63362	o	chr2.2	+	27730152	27803315	MSTRG.33343.1	2	1090	MSTRG.33343	MS.gene043819	3.80785	6.72368	0.0001	0.0001	0.0001	0.0001	35105.4	15.0994	0.00150446	0.119801	up	yes
72337	u	chr2.3	.	42091739	42092121	MSTRG.38019.1	1	383	MSTRG.38019	.	1.6006	2.79684	9.56551	0.0001	0.0001	0.0001	46543.2	15.5063	0.00150721	0.119801	up	yes
5961	u	41418	.	149696	149911	MSTRG.3208.1	1	216	MSTRG.3208	.	0.0001	16.5986	31.232	0.0001	0.0001	0.0001	159436	17.2826	0.00152237	0.120408	up	yes
139082	i	chr4.2	.	19529821	19530721	MSTRG.73395.1	1	901	MSTRG.73395	MS.gene90194	9.66548	0.0001	3.07528	0.0001	0.0001	0.0001	42469.5	15.3741	0.00154682	0.121847	up	yes
167878	u	chr5.1	+	4992181	4993948	MSTRG.88473.1	2	979	MSTRG.88473	.	0.0001	0.0001	0.0001	0.210153	3.38822	2.3737	5.02338e-05	-14.281	0.00155658	0.122112	down	yes
235144	u	chr7.2	.	1809962	1810232	MSTRG.123864.1	1	271	MSTRG.123864	.	0.0001	0.0001	0.0001	4.75059	8.93728	5.07766	1.59868e-05	-15.9328	0.0015568	0.122112	down	yes
92423	i	chr3.1	.	73200576	73201201	MSTRG.48526.1	1	626	MSTRG.48526	MS.gene06946	7.07126	0.30053	2.61419	0.0001	0.0001	0.0001	33286.6	15.0227	0.0015594	0.122112	up	yes
3870	u	32707	.	11584	11962	MSTRG.1720.1	1	379	MSTRG.1720	.	3.9304	2.34151	7.0736	0.0001	0.0001	0.0001	44485	15.441	0.00156721	0.122422	up	yes
213312	u	chr6.2	+	78358093	78361047	MSTRG.112276.10	3	2403	MSTRG.112276	.	0.0001	0.0001	0.0001	0.0001	3.07125	1.45017	6.63493e-05	-13.8796	0.00157655	0.122946	down	yes
72658	u	chr2.3	.	45846360	45846818	MSTRG.38165.1	1	459	MSTRG.38165	.	0.0001	0.0001	0.0001	8.82821	15.5303	0.0001	1.2316e-05	-16.3091	0.00158533	0.123418	down	yes
71412	u	chr2.3	.	27732670	27733172	MSTRG.37555.1	1	503	MSTRG.37555	.	0.0001	0.0001	0.0001	4.5487	3.68698	1.99922	2.93115e-05	-15.0582	0.0015879	0.123418	down	yes
14086	u	chr1.1	.	24994207	24994783	MSTRG.7270.1	1	577	MSTRG.7270	.	0.0001	0.0001	0.0001	3.03574	0.847947	5.39852	3.23199e-05	-14.9172	0.00159153	0.123456	down	yes
200881	u	chr5.4	+	73657280	73657564	MSTRG.105602.1	1	285	MSTRG.105602	.	0.804008	16.1004	4.29845	0.0001	0.0001	0.0001	70676.3	16.1089	0.00160431	0.124166	up	yes
5999	u	41445	.	828	1116	MSTRG.3244.1	1	289	MSTRG.3244	.	0.595998	0.0001	0.0001	221.102	0.0001	9.21581	0.00258859	-8.59362	0.00160547	0.124166	down	yes
207015	i	chr6.1	.	75833586	75834303	MSTRG.108855.1	1	718	MSTRG.108855	MS.gene052467	0.205576	5.32057	2.84269	0.0001	0.0001	0.0001	27896.1	14.7678	0.00162991	0.125536	up	yes
27485	u	chr1.2	.	59198590	59199325	MSTRG.14331.1	1	736	MSTRG.14331	.	0.0001	0.0001	0.0001	4.85879	0.129364	3.79886	3.41413e-05	-14.8381	0.00167102	0.127756	down	yes
47109	u	chr1.4	-	56502382	56502695	MSTRG.24846.1	1	314	MSTRG.24846	.	24.6244	0.0001	9.89409	0.0001	0.0001	0.0001	115062	16.8121	0.00167876	0.128138	up	yes
259308	j	chr7.4	-	39484129	39484894	MSTRG.136570.1	2	434	MSTRG.136570	MS.gene055160	2.98067	4.34324	4.02895	0.0001	0.0001	0.0001	37842.9	15.2077	0.0016936	0.128536	up	yes
231014	u	chr7.1	.	37467915	37468157	MSTRG.121762.1	1	243	MSTRG.121762	.	0.0001	0.0001	0.0001	0.0001	12.8385	30.2817	6.95728e-06	-17.133	0.00170104	0.12871	down	yes
82665	u	chr2.4	.	60114214	60114510	MSTRG.43362.1	1	297	MSTRG.43362	.	0.0001	0.0001	0.0001	5.85818	2.5155	8.62829	1.7645e-05	-15.7904	0.00170853	0.128845	down	yes
166008	i	chr4.4	.	80653204	80653738	MSTRG.87498.1	1	535	MSTRG.87498	MS.gene80738	0.601849	3.82441	5.4247	0.0001	0.0001	0.0001	32836.5	15.003	0.00173484	0.130083	up	yes
271488	u	chr8.1	+	72383441	72385629	MSTRG.142997.1	3	910	MSTRG.142997	.	0.0001	5.35807	5.36222	0.0001	0.0001	0.0001	35734.7	15.125	0.00176212	0.131583	up	yes
62863	u	chr2.2	-	22495210	22499345	MSTRG.33082.1	2	853	MSTRG.33082	.	0.0001	0.0001	0.0001	1.40357	1.05917	3.43481	5.08686e-05	-14.2629	0.00177598	0.131898	down	yes
47328	u	chr1.4	.	58411857	58412112	MSTRG.24974.1	1	256	MSTRG.24974	.	0.0001	26.4199	12.8248	0.0001	0.0001	0.0001	130816	16.9972	0.00178801	0.132371	up	yes
44179	o	chr1.4	+	22480952	22597443	MSTRG.23357.1	2	574	MSTRG.23357	MS.gene88545	0.0001	0.0001	0.0001	10.3365	7.99433	0.0001	1.63658e-05	-15.899	0.00180187	0.133079	down	yes
155040	u	chr4.3	.	73411577	73411873	MSTRG.81669.1	1	297	MSTRG.81669	.	0.0001	8.6988	24.1454	0.0001	0.0001	0.0001	109481	16.7403	0.00181108	0.133444	up	yes
50029	i	chr1.4	.	77813366	77814342	MSTRG.26377.1	1	977	MSTRG.26377	MS.gene061150	0.0001	0.0001	0.0001	1.68606	1.76395	1.50339	6.05645e-05	-14.0112	0.00186157	0.135324	down	yes
132684	u	chr4.1	.	52133932	52134213	MSTRG.70012.1	1	282	MSTRG.70012	.	0.0001	0.0001	0.0001	0.0001	19.5974	15.5651	8.53178e-06	-16.8387	0.00186246	0.135324	down	yes
248580	u	chr7.3	.	27733070	27733498	MSTRG.131038.1	1	429	MSTRG.131038	.	3.51555	2.78133	4.93849	0.0001	0.0001	0.0001	37451.2	15.1927	0.00188589	0.136044	up	yes
292386	u	chr8.3	.	80362482	80363618	MSTRG.153815.1	1	1137	MSTRG.153815	.	0.0001	4.68917	3.68133	0.0001	0.0001	0.0001	27902	14.7681	0.00189682	0.136299	up	yes
116182	u	chr3.4	.	7569749	7570801	MSTRG.61104.1	1	1053	MSTRG.61104	.	1.24405	3.11316	0.604491	0.0001	0.0001	0.0001	16539	14.0136	0.00190478	0.136428	up	yes
23087	u	chr1.2	+	14481031	14481382	MSTRG.12088.1	1	352	MSTRG.12088	.	3.2853	3.02115	17.7097	0.15349	0.0001	0.0001	156.264	7.28784	0.00190555	0.136428	up	yes
157848	u	chr4.4	+	6946147	6947196	MSTRG.83198.1	2	305	MSTRG.83198	.	0.0001	0.0001	0.0001	2.03137	6.47995	7.8473	1.8339e-05	-15.7347	0.00190855	0.136538	down	yes
167716	u	chr5.1	.	3716484	3717845	MSTRG.88386.1	1	1362	MSTRG.88386	.	0.0001	0.0001	0.0001	0.0001	4.01782	3.20601	4.15286e-05	-14.5555	0.00191724	0.136934	down	yes
173817	u	chr5.1	.	64850656	64851294	MSTRG.91540.1	1	639	MSTRG.91540	.	0.0001	8.52114	6.33314	0.0001	0.0001	0.0001	49514.6	15.5956	0.00192277	0.136934	up	yes
93186	i	chr3.1	.	78212060	78212441	MSTRG.48979.1	1	382	MSTRG.48979	MS.gene06278	0.0001	0.0001	0.0001	3.60867	5.07954	3.97966	2.3682e-05	-15.3659	0.00192546	0.137014	down	yes
30161	j	chr1.2	-	76444772	76445678	MSTRG.15771.1	2	726	MSTRG.15771	MS.gene34399	19.3751	19.5359	10.7499	0.091778	1.20712	0.0001	38.2302	5.25664	0.00193703	0.137019	up	yes
109305	o	chr3.3	-	52265042	52285773	MSTRG.57461.1	2	243	MSTRG.57461	MS.gene048504	12.2374	0.299911	12.9358	0.0001	0.0001	0.0001	84910.4	16.3737	0.00193778	0.137019	up	yes
203461	u	chr6.1	-	22403569	22404292	MSTRG.106874.2	2	475	MSTRG.106874	.	0.010024	6.57532	7.43107	0.0001	0.0001	0.0001	46721.4	15.5118	0.00194018	0.137019	up	yes
197551	u	chr5.4	.	42293953	42296099	MSTRG.103823.1	1	2147	MSTRG.103823	.	0.0001	0.0001	0.0001	0.853667	0.605963	0.798423	0.000132858	-12.8778	0.00196064	0.138046	down	yes
203126	i	chr6.1	-	17494330	17495641	MSTRG.106772.1	2	1167	MSTRG.106772	MS.gene85690	0.0001	0.0001	0.0001	6.32362	2.66549	0.0001	3.33733e-05	-14.8709	0.00197166	0.138614	down	yes
268785	o	chr8.1	+	41745772	41798543	MSTRG.141649.1	2	452	MSTRG.141649	MS.gene064913	6.17375	3.09912	1.87697	0.0001	0.0001	0.0001	37166.2	15.1817	0.00199431	0.13948	up	yes
76766	x	chr2.4	-	2426888	2444540	MSTRG.40373.1	2	254	MSTRG.40373	MS.gene89082	0.0001	0.0001	0.0001	0.522098	4.15812	19.0554	1.26392e-05	-16.2717	0.00199671	0.13948	down	yes
108293	i	chr3.3	-	42656468	42657244	MSTRG.56952.1	2	748	MSTRG.56952	MS.gene30157	0.0001	0.0001	0.0001	4.23231	1.09543	1.49113	4.39956e-05	-14.4723	0.00199832	0.13948	down	yes
253181	u	chr7.3	.	82449805	82450143	MSTRG.133416.1	1	339	MSTRG.133416	.	0.0001	0.0001	0.0001	7.33305	6.86308	1.19642	1.94899e-05	-15.6469	0.00203187	0.14044	down	yes
9029	u	51888	.	23131	23393	MSTRG.4787.1	1	263	MSTRG.4787	.	0.0001	0.0001	0.0001	6.72926	3.05474	8.63036	1.62916e-05	-15.9055	0.00203899	0.14044	down	yes
232963	u	chr7.1	.	65399094	65399557	MSTRG.122748.1	1	464	MSTRG.122748	.	0.0001	0.0001	0.0001	4.07303	2.2135	4.10287	2.88756e-05	-15.0798	0.00204177	0.14044	down	yes
132643	u	chr4.1	.	51295252	51295657	MSTRG.69995.1	1	406	MSTRG.69995	.	0.0001	0.0001	0.0001	6.35001	1.84187	3.9853	2.46362e-05	-15.3089	0.00204418	0.14044	down	yes
186593	u	chr5.3	+	14524374	14526980	MSTRG.98192.1	6	567	MSTRG.98192	.	0.0001	0.0001	0.0001	0.0001	7.34043	9.46844	1.78476e-05	-15.7739	0.00204493	0.14044	down	yes
114587	u	chr3.3	.	89748798	89749630	MSTRG.60288.1	1	833	MSTRG.60288	.	0.0001	0.0001	0.0001	3.84942	8.3142	0.0001	2.46635e-05	-15.3073	0.00204527	0.14044	down	yes
73017	i	chr2.3	.	49952064	49952787	MSTRG.38335.1	1	724	MSTRG.38335	MS.gene025105	2.57224	1.72542	2.25986	0.0001	0.0001	0.0001	21858.4	14.4159	0.0020457	0.14044	up	yes
197968	o	chr5.4	-	47713515	47719601	MSTRG.104040.1	2	447	MSTRG.104040	MS.gene010288	1.58846	4.84405	4.39896	0.0001	0.0001	0.0001	36104.9	15.1399	0.002069	0.141629	up	yes
161012	j	chr4.4	+	28682854	28684085	MSTRG.84887.2	2	1132	MSTRG.84887	MS.gene56409	5.9894	0.598356	1.55647	8.82618	63.0093	91.2428	0.0499406	-4.32364	0.00208141	0.142161	down	yes
219100	u	chr6.3	-	61140512	61147633	MSTRG.115358.1	2	565	MSTRG.115358	.	1.56047	3.87464	3.03846	0.0001	0.0001	0.0001	28245.2	14.7857	0.00208675	0.142227	up	yes
47389	u	chr1.4	.	59059272	59059596	MSTRG.25013.1	1	325	MSTRG.25013	.	0.0001	0.0001	0.0001	5.49803	5.79078	3.44184	2.03657e-05	-15.5835	0.0021298	0.144516	down	yes
162811	u	chr4.4	.	40838842	40839260	MSTRG.85909.1	1	419	MSTRG.85909	.	5.25259	2.53779	3.59046	0.0001	0.0001	0.0001	37936.1	15.2113	0.00214104	0.145068	up	yes
219921	u	chr6.3	.	71484100	71484887	MSTRG.115832.1	1	788	MSTRG.115832	.	0.0001	0.0001	0.0001	0.468771	2.51475	3.40535	4.69567e-05	-14.3783	0.00214766	0.145108	down	yes
143722	j	chr4.2	+	62897351	62898126	MSTRG.75869.3	3	510	MSTRG.75869	MS.gene35553	10.9258	8.44678	0.0001	0.0001	0.0001	0.0001	64575.6	15.9787	0.00214967	0.145108	up	yes
94881	u	chr3.1	+	89367355	89368547	MSTRG.49898.1	3	455	MSTRG.49898	.	0.0001	0.0001	0.0001	0.0001	11.2499	9.1871	1.46792e-05	-16.0559	0.00216735	0.145899	down	yes
186912	u	chr5.3	.	16967060	16967510	MSTRG.98352.1	1	451	MSTRG.98352	.	0.0001	13.6583	6.84401	0.0001	0.0001	0.0001	68341.4	16.0605	0.00217348	0.146206	up	yes
239450	u	chr7.2	.	31712214	31712838	MSTRG.126136.1	1	625	MSTRG.126136	.	0.0001	0.0001	0.0001	8.05969	7.57361	0.0001	1.91897e-05	-15.6693	0.00217977	0.146453	down	yes
220487	x	chr6.3	-	77425973	77431348	MSTRG.116203.1	2	235	MSTRG.116203	MS.gene51278	3.22745	6.77389	10.1624	0.0001	0.0001	0.0001	67212.5	16.0364	0.00218027	0.146453	up	yes
232550	u	chr7.1	.	60552108	60552343	MSTRG.122527.1	1	236	MSTRG.122527	.	0.0001	25.4283	13.3896	0.0001	0.0001	0.0001	129393	16.9814	0.00221847	0.148329	up	yes
98107	u	chr3.2	.	36872601	36872852	MSTRG.51618.1	1	252	MSTRG.51618	.	0.0001	23.6207	12.6555	0.0001	0.0001	0.0001	120921	16.8837	0.00223396	0.148762	up	yes
189060	u	chr5.3	.	44447763	44448081	MSTRG.99452.1	1	319	MSTRG.99452	.	0.0001	11.7564	15.932	0.0001	0.0001	0.0001	92295	16.494	0.0022431	0.149066	up	yes
64276	j	chr2.2	+	42201879	42204703	MSTRG.33790.1	2	455	MSTRG.33790	MS.gene025387	0.432694	0.0001	0.0001	0.61007	9.56017	34.8554	0.00961438	-6.70059	0.00226338	0.150007	down	yes
102631	u	chr3.2	-	77228743	77229228	MSTRG.53952.2	2	447	MSTRG.53952	.	0.0001	9.00426	10.3451	0.0001	0.0001	0.0001	64498.3	15.977	0.00233853	0.153506	up	yes
260520	u	chr7.4	.	55586758	55587849	MSTRG.137232.1	1	1092	MSTRG.137232	.	0.0001	3.08499	4.84012	0.0001	0.0001	0.0001	26417.4	14.6892	0.00234378	0.153682	up	yes
180312	u	chr5.2	.	41088042	41089205	MSTRG.94916.1	1	1164	MSTRG.94916	.	0.0001	0.161598	0.0001	5.39187	1.95254	3.43165	0.0150146	-6.05749	0.00234659	0.153758	down	yes
161590	j	chr4.4	+	32637850	32639401	MSTRG.85247.2	4	1093	MSTRG.85247	MS.gene006567	0.0001	0.0001	0.0001	3.18427	1.14746	0.3756	6.37305e-05	-13.9377	0.00236601	0.15449	down	yes
159620	u	chr4.4	.	18834089	18834776	MSTRG.84139.1	1	688	MSTRG.84139	.	0.0001	0.0001	0.0001	0.0001	8.03298	5.0587	2.29152e-05	-15.4133	0.00239877	0.155435	down	yes
58239	u	chr2.1	.	63769255	63770638	MSTRG.30585.1	1	1384	MSTRG.30585	.	0.0001	0.0001	0.0001	0.687974	1.7269	0.998539	8.78885e-05	-13.474	0.00240567	0.155666	down	yes
84176	i	chr2.4	.	71896406	71897360	MSTRG.44135.1	1	955	MSTRG.44135	MS.gene002376	0.0001	0.0001	0.0001	2.87279	1.4608	0.762555	5.88679e-05	-14.0522	0.00242292	0.15635	down	yes
25296	u	chr1.2	.	38312771	38313817	MSTRG.13252.1	1	1047	MSTRG.13252	.	0.160305	0.0001	0.127373	0.889222	66.1273	0.0001	0.00429413	-7.86342	0.00242818	0.156581	down	yes
155095	i	chr4.3	.	74171465	74172101	MSTRG.81702.1	1	637	MSTRG.81702	MS.gene48985	0.0001	0.0001	0.0001	1.543	4.8905	1.25894	3.89994e-05	-14.6462	0.00243681	0.156921	down	yes
229479	i	chr7.1	.	23409635	23409987	MSTRG.120920.1	1	353	MSTRG.120920	MS.gene024135	0.0001	8.04321	15.7063	0.0001	0.0001	0.0001	79165.4	16.2726	0.00255595	0.162688	up	yes
214884	u	chr6.3	.	4025104	4025477	MSTRG.113122.1	1	374	MSTRG.113122	.	0.0001	0.0001	0.0001	5.59161	3.32903	3.5264	2.41021e-05	-15.3405	0.00256443	0.162944	down	yes
239444	u	chr7.2	.	31702829	31703313	MSTRG.126130.1	1	485	MSTRG.126130	.	0.0001	0.0001	0.0001	10.6642	8.15419	0.0001	1.59418e-05	-15.9368	0.00258548	0.163585	down	yes
154792	u	chr4.3	.	70565750	70566080	MSTRG.81549.1	1	331	MSTRG.81549	.	0.0001	0.0001	0.0001	1.49271	4.35465	8.61863	2.07383e-05	-15.5573	0.00261349	0.164337	down	yes
32694	u	chr1.3	.	6604308	6604782	MSTRG.17142.1	1	475	MSTRG.17142	.	0.345828	8.50367	2.47304	0.0001	0.0001	0.0001	37741.8	15.2039	0.0026878	0.167551	up	yes
119352	j	chr3.4	+	50698442	50699676	MSTRG.62777.2	4	488	MSTRG.62777	MS.gene73112	0.0001	14.2328	3.95469	0.0001	0.0001	0.0001	60625.2	15.8876	0.00269276	0.167742	up	yes
5885	u	41333	.	48089	48592	MSTRG.3140.1	1	504	MSTRG.3140	.	4.58367	2.90283	2.91737	4.2608	21.0238	218.979	0.0425928	-4.55325	0.00272297	0.169173	down	yes
231085	u	chr7.1	.	38273790	38274039	MSTRG.121791.1	1	250	MSTRG.121791	.	0.0001	16.05	16.417	0.0001	0.0001	0.0001	108224	16.7237	0.00277044	0.171082	up	yes
132532	u	chr4.1	.	49283734	49284037	MSTRG.69943.1	1	304	MSTRG.69943	.	1.66414	4.46606	8.92944	0.0001	0.0001	0.0001	50198.8	15.6154	0.00280672	0.172238	up	yes
226165	u	chr7.1	+	1480419	1480926	MSTRG.119181.1	2	416	MSTRG.119181	.	5.54685	1.53445	4.05379	0.0001	0.0001	0.0001	37117	15.1798	0.00280934	0.17225	up	yes
144413	u	chr4.2	.	72437840	72438722	MSTRG.76184.1	1	883	MSTRG.76184	.	0.0001	0.0001	0.0001	0.0001	6.92461	2.85215	3.06847e-05	-14.9921	0.00281957	0.172765	down	yes
266840	u	chr8.1	.	25716445	25716765	MSTRG.140603.1	1	321	MSTRG.140603	.	0.0001	23.9823	4.32882	0.0001	0.0001	0.0001	94370.7	16.5261	0.00282426	0.172825	up	yes
87778	u	chr3.1	.	34283600	34284813	MSTRG.46108.1	1	1214	MSTRG.46108	.	0.0001	0.0001	0.0001	2.64905	4.61097	0.0001	4.13217e-05	-14.5627	0.00283032	0.173025	down	yes
71590	u	chr2.3	.	30684117	30684818	MSTRG.37626.1	1	702	MSTRG.37626	.	0.0001	0.0001	0.0001	1.13773	3.54123	1.87515	4.57728e-05	-14.4151	0.00283969	0.173403	down	yes
201162	u	chr5.4	+	75941300	75945719	MSTRG.105741.2	6	1742	MSTRG.105741	.	4.62045	1.59736	0.229666	0.057311	0.0001	0.01579	88.0791	6.46073	0.00287725	0.17481	up	yes
102830	i	chr3.2	+	78226420	78227454	MSTRG.54068.1	2	783	MSTRG.54068	MS.gene057267	0.453032	3.90493	1.83223	0.0001	0.0001	0.0001	20634	14.3327	0.00290256	0.175506	up	yes
241905	u	chr7.2	.	63654190	63654626	MSTRG.127482.1	1	437	MSTRG.127482	.	0.0001	0.0001	0.0001	5.02676	2.37976	3.02718	2.8753e-05	-15.0859	0.0029056	0.175506	down	yes
150596	u	chr4.3	.	26601677	26602241	MSTRG.79435.1	1	565	MSTRG.79435	.	0.0001	0.0001	0.0001	5.39732	10.0323	0.0001	1.9443e-05	-15.6504	0.0029217	0.176023	down	yes
190690	u	chr5.3	.	61100884	61101908	MSTRG.100262.1	1	1025	MSTRG.100262	.	0.0001	5.16856	2.74031	0.0001	0.0001	0.0001	26363.2	14.6862	0.00295787	0.177468	up	yes
257525	u	chr7.4	.	23633199	23634176	MSTRG.135636.1	1	978	MSTRG.135636	.	5.03124	2.52091	5.30093	0.0001	0.174811	0.0001	73.4416	6.19853	0.00295871	0.177468	up	yes
219702	u	chr6.3	.	69482677	69483485	MSTRG.115654.1	1	809	MSTRG.115654	.	0.0001	0.0001	0.0001	0.0001	4.82176	5.26919	2.97293e-05	-15.0378	0.00298495	0.178112	down	yes
19293	u	chr1.1	+	70963930	70969882	MSTRG.10021.1	2	635	MSTRG.10021	.	0.0001	0.0001	0.0001	0.0001	3.74693	9.22009	2.31355e-05	-15.3995	0.0030395	0.180675	down	yes
133636	u	chr4.1	.	66923358	66923654	MSTRG.70504.1	1	297	MSTRG.70504	.	6.38781	0.0001	21.3354	0.0001	0.0001	0.0001	92411	16.4958	0.00305482	0.181147	up	yes
98570	o	chr3.2	-	43646216	43668481	MSTRG.51841.1	2	458	MSTRG.51841	MS.gene94352	3.86989	3.38216	1.46621	62.5953	12.3017	42.6376	0.0741761	-3.7529	0.00307269	0.181677	down	yes
207770	u	chr6.2	.	2083401	2083617	MSTRG.109260.1	1	217	MSTRG.109260	.	0.0001	0.0001	0.0001	0.0001	6.49662	33.0781	7.58058e-06	-17.0093	0.00308374	0.181917	down	yes
137497	u	chr4.2	+	9204406	9206550	MSTRG.72565.1	2	1157	MSTRG.72565	.	1.27968	1.3555	1.15345	0.0001	0.0001	0.0001	12628.8	13.6244	0.00311571	0.183341	up	yes
72151	u	chr2.3	.	39544963	39545167	MSTRG.37900.1	1	205	MSTRG.37900	.	0.0001	0.0001	0.0001	0.0001	17.3982	21.4632	7.71971e-06	-16.983	0.00312342	0.183679	down	yes
238916	u	chr7.2	.	27737286	27737549	MSTRG.125911.1	1	264	MSTRG.125911	.	0.0001	3.89729	27.3371	0.0001	0.0001	0.0001	104115	16.6678	0.00319447	0.186566	up	yes
136361	o	chr4.2	+	2222709	2223398	MSTRG.71936.1	2	489	MSTRG.71936	MS.gene04758	0.0001	0.0001	0.0001	0.0001	14.6681	3.0435	1.6938e-05	-15.8494	0.00320099	0.186734	down	yes
288618	u	chr8.3	-	45599109	45614008	MSTRG.151986.1	2	265	MSTRG.151986	.	0.0001	0.0001	0.0001	0.0001	24.1853	7.48702	9.47197e-06	-16.6879	0.00320134	0.186734	down	yes
290664	u	chr8.3	.	67649565	67649959	MSTRG.152990.1	1	395	MSTRG.152990	.	5.88545	1.95167	3.43364	0.0001	0.0001	0.0001	37569.2	15.1973	0.00320927	0.18708	up	yes
152945	u	chr4.3	-	45884904	45885988	MSTRG.80665.1	1	1085	MSTRG.80665	.	0.325975	3.79243	2.8322	0.040595	0.0001	0.0001	170.379	7.4126	0.00321473	0.187281	up	yes
26316	u	chr1.2	+	49450734	49460837	MSTRG.13772.28	3	2409	MSTRG.13772	.	1e-06	1e-06	0.0001	3.39084	2.05703	0.0001	1.87226e-05	-15.7049	0.00322961	0.187797	down	yes
161997	i	chr4.4	.	35147396	35147967	MSTRG.85470.1	1	572	MSTRG.85470	MS.gene057681	0.0001	0.0001	0.0001	4.28185	1.52543	2.10614	3.79102e-05	-14.6871	0.00324997	0.188629	down	yes
6327	u	42387	.	68	282	MSTRG.3440.1	1	215	MSTRG.3440	.	11.6056	9.59386	1.35932	0.0001	0.0001	0.0001	75196	16.1984	0.00326926	0.189631	up	yes
209646	u	chr6.2	-	20665630	20666645	MSTRG.110253.2	2	969	MSTRG.110253	.	0.0001	0.0001	0.0001	7.74584	1.51265	0.0001	3.24024e-05	-14.9135	0.00331472	0.191555	down	yes
56465	u	chr2.1	-	47419187	47420353	MSTRG.29689.1	2	1017	MSTRG.29689	.	0.108267	0.046796	0.0001	3.28852	3.76874	1.5627	0.0180004	-5.79583	0.00334231	0.192529	down	yes
133289	u	chr4.1	.	61847534	61847983	MSTRG.70323.1	1	450	MSTRG.70323	.	11.5054	8.26264	7.05468	0.0001	0.435521	0.0001	61.5594	5.94391	0.00336446	0.193199	up	yes
107790	u	chr3.3	.	35814495	35815552	MSTRG.56676.1	1	1058	MSTRG.56676	.	0.0001	0.0001	0.0001	4.03939	0.0001	3.06585	4.22217e-05	-14.5317	0.00338404	0.19362	down	yes
218474	u	chr6.3	.	50430771	50431778	MSTRG.115011.1	1	1008	MSTRG.115011	.	0.0001	0.0001	0.0001	2.83139	5.2302	0.0001	3.7213e-05	-14.7138	0.00340237	0.193936	down	yes
32820	u	chr1.3	-	7856603	7857784	MSTRG.17220.1	2	1033	MSTRG.17220	.	0.0001	4.20967	3.04954	0.0001	0.0001	0.0001	24197.7	14.5626	0.00340362	0.193936	up	yes
41279	u	chr1.3	.	78844477	78844798	MSTRG.21804.1	1	322	MSTRG.21804	.	0.0001	0.0001	0.0001	9.21755	15.963	0.0001	1.19139e-05	-16.357	0.00342334	0.194124	down	yes
291161	u	chr8.3	.	71714744	71715036	MSTRG.153267.1	1	293	MSTRG.153267	.	0.0001	0.0001	0.0001	0.0001	3.44881	25.4872	1.03677e-05	-16.5575	0.00344592	0.194921	down	yes
165615	u	chr4.4	.	77267231	77268045	MSTRG.87296.1	1	815	MSTRG.87296	.	1.2338	2.10205	1.94901	0.0001	0.0001	0.0001	17616.2	14.1046	0.00348867	0.196388	up	yes
35764	u	chr1.3	.	36751658	36751977	MSTRG.18826.1	1	320	MSTRG.18826	.	0.0001	0.0001	0.0001	3.77319	0.890443	9.85707	2.06602e-05	-15.5628	0.00349351	0.196429	down	yes
167696	u	chr5.1	.	3597494	3598063	MSTRG.88371.1	1	570	MSTRG.88371	.	0.0001	0.0001	0.0001	0.0001	7.14732	6.13926	2.2579e-05	-15.4347	0.00352263	0.197285	down	yes
91671	i	chr3.1	.	67770137	67770654	MSTRG.48140.1	1	518	MSTRG.48140	MS.gene70404	0.0001	0.0001	0.0001	0.0001	10.5615	4.51882	1.98933e-05	-15.6174	0.00356433	0.19862	down	yes
144868	u	chr4.2	.	77217709	77218881	MSTRG.76404.1	1	1173	MSTRG.76404	.	0.0001	1.72916	4.51013	0.0001	0.0001	0.0001	20798	14.3442	0.00358149	0.199334	up	yes
101617	u	chr3.2	.	70362324	70363000	MSTRG.53428.1	1	677	MSTRG.53428	.	0.0001	2.68794	8.13856	0.0001	0.0001	0.0001	36088.7	15.1393	0.00362235	0.200952	up	yes
264491	u	chr8.1	.	8169723	8170346	MSTRG.139316.1	1	624	MSTRG.139316	.	7.11129	0.0001	4.90021	0.0001	0.0001	0.0001	40038.6	15.2891	0.00370783	0.204117	up	yes
210768	u	chr6.2	.	35994739	35995077	MSTRG.110803.1	1	339	MSTRG.110803	.	0.0001	10.4199	10.6596	0.0001	0.0001	0.0001	70265.6	16.1005	0.00372235	0.204495	up	yes
46382	o	chr1.4	-	49891116	49891998	MSTRG.24471.1	2	692	MSTRG.24471	MS.gene72302	0.0001	6.39434	4.01456	0.0001	0.0001	0.0001	34696.7	15.0825	0.00375153	0.205615	up	yes
21903	u	chr1.2	-	5101882	5102952	MSTRG.11454.2	2	709	MSTRG.11454	.	0.0001	0.0001	0.0001	2.59464	3.76024	0.319952	4.49449e-05	-14.4415	0.00380915	0.207799	down	yes
169203	u	chr5.1	.	14862013	14862423	MSTRG.89152.1	1	411	MSTRG.89152	.	1.83331	5.29623	3.37131	0.0001	0.0001	0.0001	35002.8	15.0952	0.00383281	0.208294	up	yes
263277	u	chr7.4	+	93877201	93878380	MSTRG.138632.1	1	1180	MSTRG.138632	.	15.1326	7.06608	16.7809	0.103552	1.27511	0.0001	28.2714	4.82127	0.00386571	0.209418	up	yes
179214	u	chr5.2	.	26661374	26661864	MSTRG.94365.1	1	491	MSTRG.94365	.	0.0001	0.0001	0.0001	0.0001	13.8849	2.50998	1.82983e-05	-15.7379	0.00388184	0.210049	down	yes
222373	u	chr6.4	-	14372392	14375632	MSTRG.117124.1	5	882	MSTRG.117124	.	0.0001	3.61784	4.28375	0.0001	0.0001	0.0001	26339	14.6849	0.00388515	0.210053	up	yes
254917	u	chr7.4	.	5374269	5374509	MSTRG.134269.1	1	241	MSTRG.134269	.	0.0001	0.0001	0.0001	5.0427	0.0001	25.7459	9.74385e-06	-16.6471	0.00390478	0.210559	down	yes
225158	u	chr6.4	.	57103814	57104438	MSTRG.118656.1	1	625	MSTRG.118656	.	35.58	56.4222	0.0001	0.0001	0.528185	0.0001	174.12	7.44394	0.00394004	0.211824	up	yes
212162	u	chr6.2	.	63163919	63164531	MSTRG.111566.1	1	613	MSTRG.111566	.	0.0001	0.0001	0.0001	4.33856	0.639426	2.34625	4.09599e-05	-14.5754	0.00397996	0.213051	down	yes
18113	u	chr1.1	.	63741921	63743262	MSTRG.9347.1	1	1342	MSTRG.9347	.	0.0001	1.58011	3.61556	0.0001	0.0001	0.0001	17319.2	14.0801	0.00398062	0.213051	up	yes
274072	u	chr8.2	.	5893109	5893599	MSTRG.144340.1	1	491	MSTRG.144340	.	0.0001	0.216934	0.0001	8.92902	6.08497	1.8337	0.0128881	-6.27782	0.00399338	0.213545	down	yes
77156	u	chr2.4	.	5123611	5123897	MSTRG.40562.1	1	287	MSTRG.40562	.	5.87294	3.13926	5.79431	0.0001	0.0001	0.0001	49355	15.5909	0.00399442	0.213545	up	yes
33660	i	chr1.3	.	14348697	14349647	MSTRG.17705.1	1	951	MSTRG.17705	MS.gene054108	0.0001	0.112003	0.0001	4.85191	2.31075	1.29193	0.0132713	-6.23555	0.00404096	0.215377	down	yes
32341	u	chr1.3	.	4226097	4226890	MSTRG.16932.1	1	794	MSTRG.16932	.	1.46582	1.70929	2.08936	0.0001	0.0001	0.0001	17548.2	14.099	0.00404976	0.215518	up	yes
214712	u	chr6.3	.	2729760	2730383	MSTRG.113051.1	1	624	MSTRG.113051	.	6.14995	5.8857	0.0001	0.0001	0.0001	0.0001	40119.1	15.292	0.00406354	0.21576	up	yes
289730	j	chr8.3	-	58521966	58526109	MSTRG.152533.2	5	654	MSTRG.152533	MS.gene88509	2.9529	1.02988	2.49571	0.0001	0.0001	0.0001	21595	14.3984	0.00407715	0.216231	up	yes
267035	o	chr8.1	-	27265246	27411661	MSTRG.140725.1	2	221	MSTRG.140725	MS.gene011831	6.69773	63.697	84.1602	3.30428	0.0001	0.0001	46.7714	5.54755	0.00411417	0.217092	up	yes
263743	u	chr8.1	+	2855774	2856591	MSTRG.138893.1	2	536	MSTRG.138893	.	9.1501	6.72083	1.32704	60.6491	39.5502	96.6649	0.0873596	-3.51689	0.00415049	0.21797	down	yes
210312	u	chr6.2	.	28914554	28915458	MSTRG.110620.1	1	905	MSTRG.110620	.	0.0001	0.0001	0.0001	0.0001	5.71701	2.28524	3.7489e-05	-14.7032	0.00424627	0.221315	down	yes
158533	u	chr4.4	.	11197006	11198116	MSTRG.83566.1	1	1111	MSTRG.83566	.	0.075535	0.0001	0.0001	2.70946	0.312147	3.53802	0.0115456	-6.43651	0.00427293	0.221962	down	yes
299535	u	chr8.4	.	64019700	64020809	MSTRG.157543.1	1	1110	MSTRG.157543	.	7.63807	10.3649	10.1408	0.355535	0.972972	0.891132	12.6795	3.66442	0.00432527	0.223811	up	yes
240646	u	chr7.2	.	44988105	44988669	MSTRG.126922.1	1	565	MSTRG.126922	.	0.0001	0.0001	0.0001	4.32551	0.346875	3.39249	3.71983e-05	-14.7144	0.00434196	0.224302	down	yes
178616	u	chr5.2	.	21973194	21973656	MSTRG.94065.1	1	463	MSTRG.94065	.	0.0001	0.0001	0.0001	0.0001	5.5083	9.49385	1.9997e-05	-15.6099	0.00434996	0.224375	down	yes
197666	u	chr5.4	.	43676697	43677093	MSTRG.103875.1	1	397	MSTRG.103875	.	1.23832	0.224533	1.24599	11.9653	8.1822	32.8968	0.0510677	-4.29145	0.00435478	0.224375	down	yes
49499	u	chr1.4	.	74305439	74305689	MSTRG.26099.1	1	251	MSTRG.26099	.	0.0001	13.2114	13.2024	0.0001	0.0001	0.0001	88046.2	16.426	0.00435537	0.224375	up	yes
137382	u	chr4.2	+	8462398	8463327	MSTRG.72507.1	2	790	MSTRG.72507	.	3.32958	0.0001	5.30918	0.0001	0.0001	0.0001	28796.2	14.8136	0.00436836	0.224796	up	yes
289038	u	chr8.3	.	50901596	50902170	MSTRG.152179.1	1	575	MSTRG.152179	.	0.0001	0.0001	0.0001	0.0001	10.5178	2.38624	2.32484e-05	-15.3925	0.00439969	0.225911	down	yes
218595	j	chr6.3	-	52409995	52413601	MSTRG.115077.4	4	625	MSTRG.115077	MS.gene83666	3.86214	7.7176	0.0001	0.0001	0.0001	0.0001	38599.5	15.2363	0.00445408	0.22796	up	yes
132531	u	chr4.1	.	49267850	49268153	MSTRG.69942.1	1	304	MSTRG.69942	.	1.70917	5.28485	6.73552	0.0001	0.0001	0.0001	45765.1	15.482	0.00445691	0.22796	up	yes
26288	u	chr1.2	+	49437094	49458261	MSTRG.13772.8	4	3462	MSTRG.13772	.	0.0001	0.0001	0.0001	0.0001	0.416056	1.64942	0.000145238	-12.7493	0.00447984	0.228771	down	yes
23601	i	chr1.2	.	18638785	18639171	MSTRG.12402.1	1	387	MSTRG.12402	MS.gene040841	1.58098	6.71433	2.75678	0.0001	0.0001	0.0001	36840.3	15.169	0.00449945	0.229646	up	yes
58508	u	chr2.1	-	65652405	65653109	MSTRG.30713.1	2	525	MSTRG.30713	.	0.0001	8.64275	4.15705	0.0001	0.0001	0.0001	42666.3	15.3808	0.00455838	0.232274	up	yes
33581	u	chr1.3	+	13745713	13748198	MSTRG.17680.1	3	752	MSTRG.17680	.	1.53068	1.62829	2.30435	0.0001	0.0001	0.0001	18211.1	14.1525	0.00462372	0.234922	up	yes
51179	u	chr1.4	.	85344086	85345569	MSTRG.26997.1	1	1484	MSTRG.26997	.	0.0001	0.0001	0.0001	0.844081	0.843436	1.08499	0.000108205	-13.1739	0.00466945	0.236018	down	yes
5020	u	40073	.	44896	45165	MSTRG.2350.1	1	270	MSTRG.2350	.	0.0001	0.0001	0.0001	4.45453	4.4084	6.49787	1.95302e-05	-15.6439	0.00467546	0.236018	down	yes
165646	u	chr4.4	+	77569266	77572154	MSTRG.87313.1	1	2889	MSTRG.87313	.	2.15909	3.25583	1.69197	0.029218	0.21482	0.0001	29.1101	4.86345	0.00467619	0.236018	up	yes
289167	i	chr8.3	.	52831057	52832258	MSTRG.152259.1	1	1202	MSTRG.152259	MS.gene36088	0.0001	0.0001	0.0001	0.0001	5.32972	0.858822	4.84759e-05	-14.3324	0.00472236	0.237651	down	yes
79489	u	chr2.4	.	24363131	24363553	MSTRG.41805.1	1	423	MSTRG.41805	.	0.0001	0.0001	0.0001	4.77404	0.818203	4.60631	2.94159e-05	-15.053	0.0047369	0.237998	down	yes
232146	u	chr7.1	.	52824612	52826740	MSTRG.122325.1	1	2129	MSTRG.122325	.	0.154874	0.0001	0.0001	0.0001	10.4395	10.703	0.00733467	-7.09105	0.00476344	0.23873	down	yes
161841	u	chr4.4	+	34230187	34231634	MSTRG.85381.1	2	281	MSTRG.85381	.	0.0001	0.0001	0.0001	7.7463	17.3032	0.0001	1.19762e-05	-16.3495	0.00476879	0.23873	down	yes
279376	u	chr8.2	.	50944878	50945293	MSTRG.147055.1	1	416	MSTRG.147055	.	1.01294	4.1126	4.80237	0.0001	0.0001	0.0001	33093	15.0142	0.00477463	0.238739	up	yes
236247	j	chr7.2	+	8439321	8440277	MSTRG.124445.2	2	828	MSTRG.124445	MS.gene050333	0.0001	0.0001	0.0001	4.57965	0.0001	3.20128	3.85553e-05	-14.6627	0.00481326	0.240414	down	yes
65220	i	chr2.2	.	52728995	52729225	MSTRG.34272.1	1	231	MSTRG.34272	MS.gene00279	0.0001	0.0001	0.0001	0.0001	5.86069	24.2028	9.97886e-06	-16.6127	0.00481916	0.240516	down	yes
222054	u	chr6.4	.	10139403	10139831	MSTRG.116961.1	1	429	MSTRG.116961	.	3.25427	3.44533	2.87564	0.0001	0.0001	0.0001	31917.5	14.9621	0.00482292	0.240516	up	yes
62172	u	chr2.2	.	15123039	15124157	MSTRG.32717.1	1	1119	MSTRG.32717	.	0.0001	0.0001	0.0001	0.0001	2.24352	3.62861	5.10879e-05	-14.2567	0.00486165	0.241669	down	yes
286302	u	chr8.3	-	24861458	24867560	MSTRG.150716.1	2	734	MSTRG.150716	.	0.0001	0.0001	0.0001	0.0001	5.04807	3.8813	3.35966e-05	-14.8613	0.00490209	0.242518	down	yes
46094	u	chr1.4	.	46648205	46648469	MSTRG.24338.1	1	265	MSTRG.24338	.	0.0001	0.0001	0.0001	5.81703	6.90587	2.96696	1.91206e-05	-15.6745	0.00491532	0.242666	down	yes
10589	i	6950	.	25203	25652	MSTRG.5462.1	1	450	MSTRG.5462	MS.gene018887	0.0001	0.0001	0.229096	6.66701	3.82393	5.43499	0.0143977	-6.11802	0.00493246	0.243377	down	yes
92445	u	chr3.1	-	73341006	73344059	MSTRG.48541.1	3	352	MSTRG.48541	.	0.0001	4.12439	14.0871	0.0001	0.0001	0.0001	60705.2	15.8895	0.0049551	0.243989	up	yes
219793	u	chr6.3	.	70295406	70296346	MSTRG.115695.1	1	941	MSTRG.115695	.	0.0001	0.0001	0.0001	0.0001	6.30208	1.24147	3.97685e-05	-14.618	0.00497138	0.244426	down	yes
286236	o	chr8.3	-	24052521	24188093	MSTRG.150681.1	2	221	MSTRG.150681	MS.gene90525	6.69773	63.9585	87.1389	3.68371	0.0001	0.0001	42.8336	5.42067	0.00497492	0.244426	up	yes
115898	u	chr3.4	.	4145978	4146893	MSTRG.60976.1	1	916	MSTRG.60976	.	2.08571	0.0001	5.00293	0.0001	0.0001	0.0001	23629.1	14.5283	0.00499168	0.245006	up	yes
8573	u	51658	.	11905	12765	MSTRG.4568.1	1	861	MSTRG.4568	.	0.0001	0.0001	0.0001	0.0001	6.69254	1.44272	3.68761e-05	-14.727	0.00499594	0.245087	down	yes
203774	u	chr6.1	.	28038096	28038327	MSTRG.107038.1	1	232	MSTRG.107038	.	3.18624	6.84113	7.39321	0.0001	0.0001	0.0001	58068.6	15.8255	0.00502733	0.24611	up	yes
262392	u	chr7.4	.	84248041	84248448	MSTRG.138176.1	1	408	MSTRG.138176	.	0.0001	0.508244	0.200984	0.74416	28.8745	7.50419	0.0191076	-5.70971	0.00505604	0.246651	down	yes
212759	u	chr6.2	-	73262155	73281367	MSTRG.111892.1	2	210	MSTRG.111892	.	0.0001	0.0001	0.0001	6.22131	4.54384	8.68258	1.5426e-05	-15.9843	0.0050794	0.246812	down	yes
167698	u	chr5.1	.	3602557	3603534	MSTRG.88372.1	1	978	MSTRG.88372	.	7.63982	2.82216	3.14206	0.0001	0.28389	0.09755	35.6556	5.15606	0.00508189	0.246812	up	yes
271492	u	chr8.1	+	72416817	72420282	MSTRG.142998.1	4	826	MSTRG.142998	.	0.0001	3.31487	4.16425	0.0001	0.0001	0.0001	24930.7	14.6056	0.00510638	0.247646	up	yes
157376	i	chr4.4	.	3791499	3791752	MSTRG.82939.1	1	254	MSTRG.82939	MS.gene20154	0.0001	0.0001	0.0001	1.17608	5.23424	10.1583	1.81065e-05	-15.7531	0.00513727	0.248446	down	yes
270451	u	chr8.1	.	62075155	62075615	MSTRG.142458.1	1	461	MSTRG.142458	.	0.0001	11.8043	2.84286	0.0001	0.0001	0.0001	48824.2	15.5753	0.00513951	0.248446	up	yes
189061	u	chr5.3	.	44448378	44448934	MSTRG.99453.1	1	557	MSTRG.99453	.	0.0001	3.44958	7.66071	0.0001	0.0001	0.0001	37034.6	15.1766	0.00515656	0.248634	up	yes
77456	u	chr2.4	-	7039883	7040624	MSTRG.40726.1	1	742	MSTRG.40726	.	0.0001	0.0001	0.0001	0.0001	2.84174	5.81599	3.46507e-05	-14.8168	0.0051662	0.248634	down	yes
271093	i	chr8.1	.	68529710	68530430	MSTRG.142806.1	1	721	MSTRG.142806	MS.gene019441	2.80282	0.960989	1.92212	0.0001	0.0001	0.0001	18953.1	14.2101	0.00516794	0.248634	up	yes
261651	u	chr7.4	.	74567690	74568023	MSTRG.137803.1	1	334	MSTRG.137803	.	0.0001	9.69948	8.80961	0.0001	0.0001	0.0001	61697.3	15.9129	0.00516923	0.248634	up	yes
114446	i	chr3.3	.	88853726	88855044	MSTRG.60214.1	1	1319	MSTRG.60214	MS.gene85655	2.68738	1.39926	0.928001	10.6391	19.6791	19.9855	0.0996874	-3.32645	0.00518655	0.249208	down	yes
152326	u	chr4.3	+	39171846	39176716	MSTRG.80341.1	2	333	MSTRG.80341	.	0.0001	0.0001	0.0001	14.8722	5.84915	0.0001	1.44778e-05	-16.0758	0.00521485	0.249834	down	yes
49659	u	chr1.4	.	75406281	75406514	MSTRG.26181.1	1	234	MSTRG.26181	.	2.28659	8.9553	6.38825	0.0001	0.0001	0.0001	58767.1	15.8427	0.00530453	0.252646	up	yes
271116	u	chr8.1	.	68797014	68797671	MSTRG.142816.1	1	658	MSTRG.142816	.	0.0001	0.0001	0.0001	0.0001	3.0672	6.67376	3.07974e-05	-14.9868	0.00530595	0.252646	down	yes
209026	u	chr6.2	+	14030614	14033463	MSTRG.109939.1	2	264	MSTRG.109939	.	0.0001	20.1425	4.84347	0.0001	0.0001	0.0001	83286.8	16.3458	0.00536816	0.253969	up	yes
175268	j	chr5.1	+	76201932	76203201	MSTRG.92275.3	3	435	MSTRG.92275	MS.gene63918	5.76289	9.49733	0.0001	0.0001	0.0001	0.0001	50867.7	15.6345	0.00536986	0.253969	up	yes
182614	i	chr5.2	.	68744282	68745073	MSTRG.96088.1	1	792	MSTRG.96088	MS.gene59238	0.0001	0.0001	0.0001	0.0001	1.75105	6.50277	3.63464e-05	-14.7478	0.00538143	0.254131	down	yes
208541	x	chr6.2	+	9135558	9139979	MSTRG.109655.1	2	269	MSTRG.109655	MS.gene031158	0.0001	0.219943	0.0001	17.5209	3.8378	3.19035	0.00896746	-6.80108	0.0053885	0.254337	down	yes
195785	u	chr5.4	-	20521807	20526704	MSTRG.102935.1	2	1592	MSTRG.102935	.	4.02571	0.592433	0.0001	0.0001	0.0001	0.0001	15394.1	13.9101	0.00539817	0.254665	up	yes
266096	i	chr8.1	.	20077909	20078466	MSTRG.140192.1	1	558	MSTRG.140192	MS.gene059967	3.62776	2.46956	1.39244	0.0001	0.0001	0.0001	24965.9	14.6077	0.00541816	0.255093	up	yes
203459	u	chr6.1	-	22402603	22403185	MSTRG.106873.2	2	476	MSTRG.106873	.	0.0001	5.95941	6.67283	0.0001	0.0001	0.0001	42107.8	15.3618	0.0054211	0.255103	up	yes
232145	u	chr7.1	.	52823505	52823808	MSTRG.122324.1	1	304	MSTRG.122324	.	0.0001	0.0001	0.0001	0.0001	7.01152	13.7154	1.44739e-05	-16.0762	0.00546553	0.256548	down	yes
42146	u	chr1.4	.	4995473	4996297	MSTRG.22302.1	1	825	MSTRG.22302	.	2.99102	0.258217	1.94894	0.0001	0.0001	0.0001	17327.3	14.0808	0.00547088	0.256591	up	yes
300690	u	chr8.4	.	74566592	74567171	MSTRG.158173.1	1	580	MSTRG.158173	.	0.0001	0.0001	0.0001	0.190356	5.37531	2.30802	3.81016e-05	-14.6798	0.00547408	0.256591	down	yes
204660	u	chr6.1	.	45453206	45453564	MSTRG.107466.1	1	359	MSTRG.107466	.	0.0001	4.06539	12.94	0.0001	0.0001	0.0001	56685	15.7907	0.00549168	0.256955	up	yes
271184	i	chr8.1	.	69558719	69559394	MSTRG.142857.1	1	676	MSTRG.142857	MS.gene019486	0.0001	0.0001	0.0001	3.37187	6.3823	0.0001	3.07558e-05	-14.9888	0.00550847	0.257334	down	yes
108272	u	chr3.3	.	42574246	42574802	MSTRG.56935.1	1	557	MSTRG.56935	.	0.0001	0.0001	0.0001	6.35838	5.33899	0.0001	2.56466e-05	-15.2509	0.00550979	0.257334	down	yes
21989	i	chr1.2	.	5895717	5896151	MSTRG.11499.1	1	435	MSTRG.11499	MS.gene24536	0.0001	0.0001	0.0001	0.869426	4.49924	4.15687	3.14943e-05	-14.9546	0.00552922	0.257855	down	yes
227945	u	chr7.1	.	13129872	13130321	MSTRG.120083.1	1	450	MSTRG.120083	.	4.10274	4.02304	1.18541	0.0001	0.0001	0.0001	31037.3	14.9217	0.00553872	0.257912	up	yes
28971	u	chr1.2	.	68651547	68652075	MSTRG.15120.1	1	529	MSTRG.15120	.	0.0001	0.0001	0.0001	0.0001	6.03673	5.61842	2.57395e-05	-15.2457	0.00557521	0.259096	down	yes
156233	u	chr4.3	.	85195195	85196116	MSTRG.82369.1	1	922	MSTRG.82369	.	0.0001	2.95758	3.47844	0.0001	0.0001	0.0001	21453.7	14.3889	0.00557801	0.259096	up	yes
217098	u	chr6.3	.	26517632	26517864	MSTRG.114281.1	1	233	MSTRG.114281	.	0.0001	0.0001	0.0001	18.5842	9.67155	0.0001	1.06173e-05	-16.5232	0.00558855	0.259457	down	yes
14083	u	chr1.1	.	24986024	24986335	MSTRG.7266.1	1	312	MSTRG.7266	.	0.0001	0.0001	0.0001	1.76933	5.02524	6.15174	2.31726e-05	-15.3972	0.00568318	0.2619	down	yes
87946	u	chr3.1	+	36145697	36146665	MSTRG.46149.1	2	896	MSTRG.46149	.	0.0001	0.0001	0.0001	2.86732	4.25586	0.0001	4.21155e-05	-14.5353	0.00576577	0.263951	down	yes
2231	u	21603	+	4594	5121	MSTRG.1021.1	1	528	MSTRG.1021	.	0.0001	0.0001	0.0001	6.1999	5.85455	0.0001	2.48869e-05	-15.2943	0.0057937	0.264447	down	yes
244459	u	chr7.2	-	93033880	93035208	MSTRG.128827.2	2	1242	MSTRG.128827	.	0.0001	0.0001	0.0001	2.27464	0.211646	0.937939	8.76112e-05	-13.4785	0.00581579	0.265136	down	yes
51484	u	chr1.4	.	87493079	87493796	MSTRG.27181.1	1	718	MSTRG.27181	.	0.0001	0.0001	0.0001	2.10306	1.55402	1.8544	5.44318e-05	-14.1652	0.0058326	0.26575	down	yes
279693	u	chr8.2	.	56076027	56076743	MSTRG.147217.1	1	717	MSTRG.147217	.	0.0001	0.0001	0.0001	0.0001	3.33047	5.07851	3.56757e-05	-14.7747	0.00589487	0.267625	down	yes
290154	u	chr8.3	.	62800878	62801609	MSTRG.152712.1	1	732	MSTRG.152712	.	0.0001	0.0001	0.0001	1.08829	2.09491	2.2146	5.55782e-05	-14.1351	0.00590447	0.267665	down	yes
14082	u	chr1.1	.	24984998	24985336	MSTRG.7265.1	1	339	MSTRG.7265	.	0.0001	0.0001	0.0001	3.24527	4.6209	3.68048	2.59816e-05	-15.2322	0.00592216	0.268155	down	yes
266999	u	chr8.1	.	26803755	26804029	MSTRG.140704.1	1	275	MSTRG.140704	.	3.01916	4.43268	6.77474	0.0001	0.0001	0.0001	47421.9	15.5333	0.00597441	0.269731	up	yes
63432	i	chr2.2	.	28342779	28343238	MSTRG.33370.1	1	460	MSTRG.33370	MS.gene066745	0.0001	0.102639	0.0001	11.0487	0.896524	2.395	0.00717136	-7.12354	0.00598272	0.269731	down	yes
23893	u	chr1.2	-	22113311	22113571	MSTRG.12603.1	1	261	MSTRG.12603	.	28.1921	31.2487	0.0001	0.204006	0.0001	0.365073	104.433	6.70643	0.00600375	0.270149	up	yes
15886	u	chr1.1	.	46580558	46581372	MSTRG.8156.1	1	815	MSTRG.8156	.	0.0001	0.0001	0.0001	0.0001	3.37058	3.99445	4.07325e-05	-14.5835	0.00601526	0.270268	down	yes
116945	u	chr3.4	.	15251236	15251454	MSTRG.61563.1	1	219	MSTRG.61563	.	12.9906	0.0001	14.4052	0.0001	0.0001	0.0001	91319.7	16.4786	0.00601886	0.270268	up	yes
179382	u	chr5.2	+	28236462	28236712	MSTRG.94445.1	1	251	MSTRG.94445	.	0.086549	0.297955	0.0001	5.7089	7.70015	11.5003	0.0154402	-6.01717	0.00601933	0.270268	down	yes
203458	u	chr6.1	-	22401857	22403203	MSTRG.106873.1	2	1022	MSTRG.106873	.	6.75475	11.8388	14.2632	0.0001	0.914626	0.0001	35.9158	5.16655	0.00604844	0.270856	up	yes
257515	u	chr7.4	-	23555910	23556244	MSTRG.135632.1	1	335	MSTRG.135632	.	10.0895	0.694537	2.36876	0.0001	0.0001	0.0001	43842.8	15.4201	0.00612132	0.273074	up	yes
272792	u	chr8.1	-	83998156	84000527	MSTRG.143676.1	5	368	MSTRG.143676	.	2.2735	4.91483	3.55132	0.0001	0.0001	0.0001	35798.8	15.1276	0.00612549	0.273124	up	yes
109730	u	chr3.3	.	55894353	55894976	MSTRG.57747.1	1	624	MSTRG.57747	.	0.0001	0.0001	0.0001	0.0001	4.45388	5.01255	3.16906e-05	-14.9456	0.00614495	0.273124	down	yes
192977	i	chr5.4	.	50064	50723	MSTRG.101461.1	1	660	MSTRG.101461	MS.gene40413	0.0001	0.0001	0.0001	4.42824	4.9391	0.0001	3.20259e-05	-14.9304	0.00620465	0.274564	down	yes
71726	u	chr2.3	.	32290136	32290648	MSTRG.37690.1	1	513	MSTRG.37690	.	0.0001	7.31849	4.04873	0.0001	0.0001	0.0001	37891.1	15.2096	0.00621715	0.274795	up	yes
155016	u	chr4.3	.	73219551	73219867	MSTRG.81656.1	1	317	MSTRG.81656	.	0.0001	2.88985	15.7837	0.0001	0.0001	0.0001	62245.6	15.9257	0.00621869	0.274795	up	yes
123329	u	chr3.4	-	83965771	83966232	MSTRG.64901.2	2	423	MSTRG.64901	.	0.0001	5.54608	7.86896	0.0001	0.0001	0.0001	44717.1	15.4485	0.00623761	0.275501	up	yes
203378	u	chr6.1	.	21029601	21029813	MSTRG.106827.1	1	213	MSTRG.106827	.	0.0001	0.0001	0.0001	0.0001	9.63411	18.0634	1.08313e-05	-16.4944	0.00624392	0.275649	down	yes
220925	u	chr6.3	.	81523373	81524133	MSTRG.116388.1	1	761	MSTRG.116388	.	0.0001	0.0001	0.0001	3.01945	5.069	0.0001	3.70895e-05	-14.7186	0.00626408	0.276018	down	yes
184058	u	chr5.2	+	79947162	79947639	MSTRG.96841.1	1	478	MSTRG.96841	.	0.0001	0.167125	0.195889	5.84779	9.15541	1.97947	0.0213814	-5.5475	0.0062702	0.276028	down	yes
300058	u	chr8.4	.	68788213	68788652	MSTRG.157816.1	1	440	MSTRG.157816	.	0.0001	0.0001	0.0001	0.0001	5.09073	8.30589	2.23935e-05	-15.4466	0.00629588	0.276767	down	yes
80210	u	chr2.4	.	31468807	31469924	MSTRG.42121.1	1	1118	MSTRG.42121	.	0.547262	2.0166	1.01729	0.0001	0.0001	0.0001	11937.2	13.5432	0.00634434	0.278374	up	yes
97001	j	chr3.2	+	18434729	18435680	MSTRG.51120.2	2	787	MSTRG.51120	MS.gene83743	0.0001	0.0001	0.0001	1.56779	0.747081	2.70323	5.97836e-05	-14.0299	0.0063529	0.278619	down	yes
179538	u	chr5.2	.	29620845	29621191	MSTRG.94541.1	1	347	MSTRG.94541	.	0.0001	7.68675	8.41661	0.0001	0.0001	0.0001	53678.2	15.712	0.00642331	0.280653	up	yes
109729	u	chr3.3	.	55879758	55880638	MSTRG.57746.1	1	881	MSTRG.57746	.	0.0001	0.2328	0.0001	7.94498	2.88598	1.52396	0.0188589	-5.72861	0.00644569	0.280975	down	yes
213010	u	chr6.2	.	75378962	75379313	MSTRG.112055.1	1	352	MSTRG.112055	.	0.0001	0.0001	0.0001	3.29337	6.64377	1.67421	2.58368e-05	-15.2402	0.00646531	0.281699	down	yes
216316	u	chr6.3	.	17482455	17483007	MSTRG.113895.1	1	553	MSTRG.113895	.	0.0001	0.0001	0.0001	0.0001	4.30749	6.16425	2.86482e-05	-15.0912	0.00650666	0.28271	down	yes
210769	u	chr6.2	.	35995747	35996043	MSTRG.110804.1	1	297	MSTRG.110804	.	0.0001	14.4883	5.28076	0.0001	0.0001	0.0001	65897.1	16.0079	0.00651226	0.282734	up	yes
160504	u	chr4.4	.	24433930	24434907	MSTRG.84613.1	1	978	MSTRG.84613	.	0.686459	0.242693	0.015796	5.37308	6.32304	5.87704	0.0537722	-4.21699	0.00658255	0.284816	down	yes
265880	u	chr8.1	.	18433334	18433615	MSTRG.140061.1	1	282	MSTRG.140061	.	3.76617	4.2889	5.34801	0.0001	0.0001	0.0001	44676.9	15.4472	0.00658937	0.284957	up	yes
17873	u	chr1.1	.	62145104	62145382	MSTRG.9213.1	1	279	MSTRG.9213	.	6.11387	0.0001	14.3405	0.0001	0.0001	0.0001	68181.7	16.0571	0.00661144	0.285298	up	yes
83917	u	chr2.4	.	70239925	70240620	MSTRG.43990.1	1	696	MSTRG.43990	.	0.0001	0.0001	0.0001	3.56858	0.873617	1.39507	5.13939e-05	-14.248	0.00661198	0.285298	down	yes
11479	u	chr1.1	.	2371518	2371767	MSTRG.5876.1	1	250	MSTRG.5876	.	4.17158	5.02998	5.76518	0.0001	0.0001	0.0001	49889.1	15.6064	0.00662018	0.28552	up	yes
174055	u	chr5.1	.	66905043	66905454	MSTRG.91653.1	1	412	MSTRG.91653	.	3.22964	0.0001	10.8217	0.0001	0.0001	0.0001	46838.2	15.5154	0.00668234	0.286974	up	yes
98117	u	chr3.2	-	36944204	36944700	MSTRG.51627.2	2	250	MSTRG.51627	.	7.47131	0.605971	8.51212	0.0001	0.0001	0.0001	55298	15.7549	0.00673044	0.288281	up	yes
101863	u	chr3.2	+	72096158	72096364	MSTRG.53552.1	1	207	MSTRG.53552	.	0.0001	0.0001	0.0001	12.8811	0.585864	7.26246	1.44722e-05	-16.0764	0.0067388	0.288506	down	yes
117152	i	chr3.4	.	17299924	17300688	MSTRG.61679.1	1	765	MSTRG.61679	MS.gene97811	1.13223	1.72149	2.01358	0.0001	0.0001	0.0001	16224.4	13.9859	0.00676857	0.289251	up	yes
19751	u	chr1.1	+	73900546	73901091	MSTRG.10258.1	2	260	MSTRG.10258	.	0.0001	0.0001	0.0001	0.0001	11.1758	10.7647	1.36732e-05	-16.1583	0.00678883	0.28972	down	yes
223501	i	chr6.4	.	34711407	34711693	MSTRG.117695.1	1	287	MSTRG.117695	MS.gene92622	2.44084	8.64765	2.81502	0.0001	0.0001	0.0001	46345	15.5001	0.00684323	0.291509	up	yes
253941	u	chr7.3	.	90886121	90886549	MSTRG.133744.1	1	429	MSTRG.133744	.	0.0001	0.989621	0.0001	0.0001	42.3711	56.4354	0.0100178	-6.6413	0.00686102	0.291973	down	yes
45493	u	chr1.4	.	38178338	38178573	MSTRG.24054.1	1	236	MSTRG.24054	.	3.99725	4.91825	6.72666	0.0001	0.0001	0.0001	52140.5	15.6701	0.006913	0.293394	up	yes
192820	u	chr5.3	.	79222222	79222685	MSTRG.101374.1	1	464	MSTRG.101374	.	3.90327	4.90617	4.59859	0.235413	0.0001	0.0001	56.907	5.83053	0.00692269	0.293418	up	yes
291195	x	chr8.3	-	71889466	71898503	MSTRG.153313.2	2	292	MSTRG.153313	MS.gene07842	1.74198	0.429717	0.61571	49.2895	12.269	2.33543	0.0436256	-4.51868	0.00692996	0.293418	down	yes
103158	u	chr3.2	+	80293360	80294564	MSTRG.54254.1	4	938	MSTRG.54254	.	0.0001	2.96699	2.86835	0.0001	0.0001	0.0001	19451.5	14.2476	0.00695362	0.293935	up	yes
40752	u	chr1.3	.	75390171	75390696	MSTRG.21511.1	1	526	MSTRG.21511	.	0.0001	0.153669	0.0001	6.04908	1.45602	3.24768	0.0143097	-6.12686	0.00697361	0.294306	down	yes
46861	u	chr1.4	.	54368917	54370150	MSTRG.24718.1	1	1234	MSTRG.24718	.	0.0001	0.0001	0.0001	3.83051	0.0001	0.9515	6.27338e-05	-13.9604	0.00701593	0.295767	down	yes
292977	u	chr8.4	.	2545740	2546782	MSTRG.154175.1	1	1043	MSTRG.154175	.	2.55853	0.0001	2.81373	0.0001	0.0001	0.0001	17907.9	14.1283	0.00705941	0.296558	up	yes
200831	u	chr5.4	.	73302883	73303153	MSTRG.105581.1	1	271	MSTRG.105581	.	3.95538	3.14434	6.3973	0.0001	0.0001	0.0001	44990.1	15.4573	0.00706664	0.296567	up	yes
190297	o	chr5.3	-	57047256	57268351	MSTRG.100113.3	2	670	MSTRG.100113	MS.gene009804	0.0001	0.0001	0.0001	1.89732	0.0001	6.37448	3.62674e-05	-14.751	0.00707119	0.296625	down	yes
290341	i	chr8.3	.	64725082	64725367	MSTRG.152807.1	1	286	MSTRG.152807	MS.gene068700	0.0001	0.0001	0.0001	7.9288	0.0001	11.2055	1.56786e-05	-15.9608	0.00708085	0.296839	down	yes
243382	u	chr7.2	-	81068043	81069365	MSTRG.128243.1	2	253	MSTRG.128243	.	5.24836	9.85209	1.26606	0.0001	0.0001	0.0001	54555	15.7354	0.00708655	0.29687	up	yes
95575	u	chr3.2	-	1832198	1842606	MSTRG.50268.1	2	565	MSTRG.50268	.	0.0001	3.29712	6.22309	0.0001	0.0001	0.0001	31734.3	14.9538	0.00709854	0.29712	up	yes
242631	i	chr7.2	.	72418566	72419141	MSTRG.127856.1	1	576	MSTRG.127856	MS.gene044826	0.0001	0.0001	0.0001	0.0001	5.95227	3.86093	3.05708e-05	-14.9975	0.00710581	0.29712	down	yes
62869	u	chr2.2	.	22623421	22623639	MSTRG.33084.1	1	219	MSTRG.33084	.	3.01392	4.18069	10.0109	0.0001	0.0001	0.0001	57351.7	15.8075	0.0071116	0.29712	up	yes
79006	u	chr2.4	.	19570026	19570766	MSTRG.41546.1	1	741	MSTRG.41546	.	0.679511	3.56099	1.13216	0.0001	0.0001	0.0001	17908.9	14.1284	0.00713313	0.297887	up	yes
39820	u	chr1.3	.	69647123	69647525	MSTRG.20999.1	1	403	MSTRG.20999	.	0.0001	12.3867	2.29059	0.0001	0.0001	0.0001	48924.6	15.5783	0.00717127	0.299079	up	yes
179346	u	chr5.2	.	27973395	27973667	MSTRG.94427.1	1	273	MSTRG.94427	.	0.0001	14.1925	6.31752	0.0001	0.0001	0.0001	68367.2	16.061	0.00717879	0.299126	up	yes
111268	u	chr3.3	.	68145795	68146106	MSTRG.58574.1	1	312	MSTRG.58574	.	6.9169	0.0001	10.7368	0.0001	0.0001	0.0001	58846.2	15.8447	0.0071855	0.299272	up	yes
44383	u	chr1.4	.	24620149	24620768	MSTRG.23489.1	1	620	MSTRG.23489	.	0.0001	3.97431	4.70555	0.0001	0.0001	0.0001	28933.2	14.8204	0.0071982	0.299273	up	yes
94458	u	chr3.1	.	86608470	86608692	MSTRG.49659.1	1	223	MSTRG.49659	.	4.35839	10.4065	2.77593	0.0001	0.0001	0.0001	58469.5	15.8354	0.00720335	0.299273	up	yes
25167	u	chr1.2	.	36468883	36469099	MSTRG.13184.1	1	217	MSTRG.13184	.	6.0002	5.61606	5.12349	0.0001	0.0001	0.0001	55799.2	15.768	0.00720447	0.299273	up	yes
223131	u	chr6.4	.	28721295	28721654	MSTRG.117509.1	1	360	MSTRG.117509	.	0.0001	0.0001	0.0001	5.58013	2.25675	2.76364	2.83005e-05	-15.1088	0.00720474	0.299273	down	yes
4786	u	39708	.	2320	2532	MSTRG.2132.1	1	213	MSTRG.2132	.	0.0001	0.0001	0.0001	10.6839	3.08907	4.50466	1.64135e-05	-15.8948	0.00725383	0.300555	down	yes
218209	u	chr6.3	.	44997593	44998009	MSTRG.114864.1	1	417	MSTRG.114864	.	0.0001	0.0001	0.0001	5.54877	3.2899	0.844153	3.09827e-05	-14.9782	0.00728692	0.300816	down	yes
199295	u	chr5.4	.	61333388	61334157	MSTRG.104745.1	1	770	MSTRG.104745	.	0.0001	0.0001	0.0001	3.48979	1.4026	0.460894	5.60404e-05	-14.1232	0.00729954	0.301121	down	yes
246607	u	chr7.3	.	14325984	14327215	MSTRG.129916.1	1	1232	MSTRG.129916	.	4.30318	0.789147	0.0001	0.0001	0.0001	0.0001	16974.8	14.0511	0.00735364	0.302421	up	yes
145242	i	chr4.2	+	80924965	80925440	MSTRG.76606.1	1	476	MSTRG.76606	MS.gene81928	3.77111	0.58085	0.280166	10.6691	33.5956	21.4128	0.0705283	-3.82565	0.00735569	0.302421	down	yes
141229	u	chr4.2	.	34825752	34826585	MSTRG.74529.1	1	834	MSTRG.74529	.	0.0001	0.0001	0.0001	0.0001	6.30565	0.985779	4.11436e-05	-14.569	0.00736998	0.302642	down	yes
203994	i	chr6.1	.	31365229	31365561	MSTRG.107153.1	1	333	MSTRG.107153	MS.gene83952	2.03396	5.8683	3.28278	0.0001	0.0001	0.0001	37283.5	15.1862	0.00744053	0.304469	up	yes
249731	u	chr7.3	.	38519140	38520205	MSTRG.131648.1	1	1066	MSTRG.131648	.	0.078724	1.4988	1.27187	10.5126	13.5801	13.169	0.0764696	-3.70897	0.00750041	0.305922	down	yes
134907	u	chr4.1	+	79220636	79221424	MSTRG.71162.2	2	531	MSTRG.71162	.	1.73957	9.82045	0.0001	0.0001	0.0001	0.0001	38533.7	15.2338	0.00751322	0.305922	up	yes
47485	i	chr1.4	.	59777312	59777778	MSTRG.25068.1	1	467	MSTRG.25068	MS.gene40027	0.0001	0.0001	0.0001	0.0001	3.22191	8.71766	2.51263e-05	-15.2804	0.00751697	0.305922	down	yes
118858	x	chr3.4	+	45381769	45384883	MSTRG.62581.1	2	232	MSTRG.62581	MS.gene027236	5.06839	6.94459	3.68002	0.0001	0.0001	0.0001	52310	15.6748	0.00756196	0.306753	up	yes
166537	u	chr4.4	.	85768042	85768476	MSTRG.87736.1	1	435	MSTRG.87736	.	0.0001	0.0001	0.0001	4.86285	2.52589	1.3093	3.44905e-05	-14.8234	0.00759194	0.307569	down	yes
150039	u	chr4.3	.	23085573	23086053	MSTRG.79145.1	1	481	MSTRG.79145	.	3.55001	3.14262	1.10902	0.0001	0.0001	0.0001	26005.5	14.6665	0.00761707	0.30792	up	yes
47819	j	chr1.4	+	62727516	62728186	MSTRG.25240.2	2	337	MSTRG.25240	MS.gene004889	0.0001	0.0001	0.0001	0.0001	11.6449	4.91117	1.81202e-05	-15.752	0.0076467	0.308984	down	yes
86648	o	chr3.1	+	19051149	19439727	MSTRG.45545.1	3	443	MSTRG.45545	MS.gene74294	0.042992	3.44178	6.12012	0.0001	0.0001	0.0001	32016.3	14.9665	0.00768966	0.310318	up	yes
173155	i	chr5.1	+	58875912	58876520	MSTRG.91130.1	2	410	MSTRG.91130	MS.gene017289	0.0001	0.0001	0.0001	3.53675	10.5555	0.0001	2.12882e-05	-15.5196	0.00773218	0.311228	down	yes
35785	u	chr1.3	.	37036374	37036947	MSTRG.18835.1	1	574	MSTRG.18835	.	0.0001	5.20855	4.03452	0.0001	0.0001	0.0001	30810.6	14.9111	0.00776994	0.312344	up	yes
136671	u	chr4.2	.	4064215	4064483	MSTRG.72084.1	1	269	MSTRG.72084	.	102.157	44.486	32.961	676.529	359.336	431.799	0.122374	-3.03063	0.00778485	0.312675	down	yes
170122	u	chr5.1	.	22985855	22986196	MSTRG.89645.1	1	342	MSTRG.89645	.	4.71441	4.29398	1.84599	0.0001	0.0001	0.0001	36181.2	15.143	0.00781449	0.313461	up	yes
268981	u	chr8.1	.	43383013	43383215	MSTRG.141735.1	1	203	MSTRG.141735	.	0.0001	14.5879	11.4243	0.0001	0.0001	0.0001	86707.6	16.4039	0.00782854	0.313719	up	yes
295906	u	chr8.4	.	24989017	24989348	MSTRG.155703.1	1	332	MSTRG.155703	.	0.0001	7.36081	8.39263	0.0001	0.0001	0.0001	52511.8	15.6804	0.00783813	0.313871	up	yes
178557	u	chr5.2	+	21519213	21519994	MSTRG.94032.1	2	500	MSTRG.94032	.	0.0001	0.0001	0.0001	0.0001	7.57328	3.48932	2.71182e-05	-15.1704	0.00784612	0.314056	down	yes
142409	u	chr4.2	.	43784979	43785442	MSTRG.75197.1	1	464	MSTRG.75197	.	0.0001	0.0001	0.0001	2.78446	2.05199	2.78351	3.93703e-05	-14.6325	0.00794132	0.316281	down	yes
272798	u	chr8.1	+	84045144	84060653	MSTRG.143677.1	2	370	MSTRG.143677	.	0.0001	0.0001	0.0001	0.0001	2.49629	12.643	1.98159e-05	-15.623	0.0079673	0.316469	down	yes
269654	u	chr8.1	.	53217339	53218018	MSTRG.142084.1	1	680	MSTRG.142084	.	0.0001	0.0001	0.0001	0.0001	2.3057	5.57075	3.80878e-05	-14.6803	0.00808826	0.320185	down	yes
217759	u	chr6.3	.	37307106	37307415	MSTRG.114576.1	1	310	MSTRG.114576	.	0.0001	0.0001	0.0001	0.0001	13.5745	4.42494	1.66671e-05	-15.8726	0.00810623	0.32076	down	yes
40856	u	chr1.3	.	76042814	76043205	MSTRG.21570.1	1	392	MSTRG.21570	.	0.0001	0.0001	0.0001	4.4115	3.99968	1.15574	3.13581e-05	-14.9608	0.00812176	0.321162	down	yes
6063	u	41575	.	26086	26437	MSTRG.3304.1	1	352	MSTRG.3304	.	0.0001	0.0001	0.0001	8.21322	7.73889	0.0001	1.88062e-05	-15.6984	0.00812324	0.321162	down	yes
179137	u	chr5.2	+	26024733	26025123	MSTRG.94324.1	1	391	MSTRG.94324	.	0.0001	0.0001	0.0001	0.0001	8.45885	5.32625	2.17625e-05	-15.4878	0.00813678	0.321298	down	yes
36884	i	chr1.3	.	48083826	48084577	MSTRG.19377.1	1	752	MSTRG.19377	MS.gene037977	0.0001	0.0001	0.0001	2.2888	5.25209	0.0001	3.97826e-05	-14.6175	0.008137	0.321298	down	yes
244346	i	chr7.2	.	91941086	91941935	MSTRG.128766.1	1	850	MSTRG.128766	MS.gene97870	0.0001	0.0001	0.0001	2.64657	3.94258	0.0001	4.55287e-05	-14.4229	0.00816087	0.321344	down	yes
167528	i	chr5.1	.	2325037	2325294	MSTRG.88274.1	1	258	MSTRG.88274	MS.gene21900	0.0001	0.0001	0.0001	5.62912	7.09122	1.77551	2.06956e-05	-15.5603	0.00816222	0.321344	down	yes
120261	j	chr3.4	-	59953632	59954382	MSTRG.63222.2	2	651	MSTRG.63222	MS.gene008677	0.0001	2.57747	5.31049	0.0001	0.0001	0.0001	26293.5	14.6824	0.00817154	0.321573	up	yes
94180	u	chr3.1	.	84930227	84930475	MSTRG.49504.1	1	249	MSTRG.49504	.	0.0001	0.0001	0.0001	0.0001	9.05148	12.3406	1.40238e-05	-16.1218	0.00820042	0.322027	down	yes
14034	o	chr1.1	-	24609454	24643302	MSTRG.7248.1	2	260	MSTRG.7248	MS.gene84492	0.0001	0.0001	0.0001	7.94091	13.4559	0.0001	1.40207e-05	-16.1221	0.00831623	0.324673	down	yes
178311	u	chr5.2	.	18904741	18905068	MSTRG.93905.1	1	328	MSTRG.93905	.	0.0001	0.0001	0.0001	0.0001	7.76202	8.39173	1.85714e-05	-15.7166	0.00834514	0.325435	down	yes
32092	u	chr1.3	-	2882669	2902054	MSTRG.16824.12	5	3140	MSTRG.16824	.	0.087793	0.0001	0.0001	0.235264	2.03881	1.73509	0.021948	-5.50977	0.00838118	0.326527	down	yes
119799	u	chr3.4	+	55874632	55875485	MSTRG.62995.1	2	228	MSTRG.62995	.	0.0001	0.0001	0.0001	0.0001	9.83854	13.1477	1.30512e-05	-16.2255	0.00840813	0.326761	down	yes
242799	u	chr7.2	-	74385735	74386638	MSTRG.127918.2	3	506	MSTRG.127918	.	0.051166	0.0001	0.0001	1.20467	2.4415	5.08048	0.0058861	-7.40847	0.00844678	0.327717	down	yes
236710	u	chr7.2	.	11791903	11792167	MSTRG.124692.1	1	265	MSTRG.124692	.	0.0001	0.0001	0.0001	9.61464	11.2943	0.0001	1.43478e-05	-16.0888	0.0084561	0.327943	down	yes
10562	u	6938	.	135059	135394	MSTRG.5439.1	1	336	MSTRG.5439	.	0.97513	7.11806	3.07388	0.0001	0.0001	0.0001	37223.5	15.1839	0.00846016	0.327964	up	yes
289058	u	chr8.3	.	51363028	51363750	MSTRG.152188.1	1	723	MSTRG.152188	.	1.60277	1.29717	1.90928	0.0001	0.0001	0.0001	16030.8	13.9686	0.00847122	0.328257	up	yes
43491	u	chr1.4	.	15642812	15643166	MSTRG.23008.1	1	355	MSTRG.23008	.	11.0686	4.86024	0.0001	0.0001	0.0001	0.0001	53096.4	15.6963	0.00849924	0.328699	up	yes
266858	i	chr8.1	.	25842270	25842695	MSTRG.140614.1	1	426	MSTRG.140614	MS.gene44489	0.0001	6.04648	5.96981	0.0001	0.0001	0.0001	40054.6	15.2897	0.00856915	0.330001	up	yes
21597	u	chr1.2	.	3059283	3059788	MSTRG.11253.1	1	506	MSTRG.11253	.	0.0001	0.0001	0.0001	0.0001	1.80704	8.91665	2.79752e-05	-15.1255	0.00859129	0.330309	down	yes
102734	i	chr3.2	.	77772748	77773053	MSTRG.54012.1	1	306	MSTRG.54012	MS.gene057222	3.83946	6.30197	1.64126	0.0001	0.0001	0.0001	39275.6	15.2613	0.00866004	0.331725	up	yes
234817	u	chr7.1	+	88259432	88259813	MSTRG.123694.1	2	357	MSTRG.123694	.	0.0001	0.0001	0.0001	1.10198	4.18156	4.8089	2.97252e-05	-15.038	0.00873007	0.333751	down	yes
269187	u	chr8.1	+	45883431	45891857	MSTRG.141844.2	3	422	MSTRG.141844	.	7.36674	10.0675	0.0001	0.057208	0.0001	0.0001	303.692	8.24647	0.00873079	0.333751	up	yes
254170	i	chr7.4	.	908229	909447	MSTRG.133884.1	1	1219	MSTRG.133884	MS.gene22707	1.91849	2.59213	0.0001	0.0001	0.0001	0.0001	15035.7	13.8761	0.00874642	0.334076	up	yes
228154	u	chr7.1	.	14439094	14439462	MSTRG.120183.1	1	369	MSTRG.120183	.	0.0001	10.473	3.76497	0.0001	0.0001	0.0001	47460.4	15.5344	0.00882653	0.336174	up	yes
60130	i	chr2.2	.	618746	619480	MSTRG.31600.1	1	735	MSTRG.31600	MS.gene83544	0.0001	0.0001	0.0001	0.419743	1.53368	3.0487	5.99745e-05	-14.0253	0.0088599	0.336911	down	yes
231460	u	chr7.1	.	43038665	43039076	MSTRG.121993.1	1	412	MSTRG.121993	.	1.63384	4.06498	2.60327	0.0001	0.0001	0.0001	27673.6	14.7562	0.00888186	0.337046	up	yes
161250	u	chr4.4	+	30152169	30152574	MSTRG.85034.1	2	271	MSTRG.85034	.	0.0001	9.79958	8.84558	0.0001	0.0001	0.0001	62150.9	15.9235	0.00891623	0.337939	up	yes
79070	u	chr2.4	.	20220911	20221683	MSTRG.41587.1	1	773	MSTRG.41587	.	1.91103	2.18051	0.58853	0.0001	0.0001	0.0001	15600.2	13.9293	0.00894796	0.338729	up	yes
157259	u	chr4.4	-	3107113	3110450	MSTRG.82870.1	3	827	MSTRG.82870	.	0.0001	2.64839	3.35879	0.0001	0.0001	0.0001	20024.3	14.2895	0.00901248	0.340365	up	yes
245536	u	chr7.3	.	6473638	6474284	MSTRG.129396.1	1	647	MSTRG.129396	.	3.01202	5.43886	0.0001	0.0001	0.0001	0.0001	28170	14.7819	0.00902706	0.340758	up	yes
150779	o	chr4.3	+	27760612	27770271	MSTRG.79537.1	2	204	MSTRG.79537	MS.gene006909	0.0001	0.0001	0.0001	11.5473	14.8284	0.0001	1.13741e-05	-16.4239	0.0090437	0.341111	down	yes
233926	j	chr7.1	-	78183180	78184781	MSTRG.123246.2	2	581	MSTRG.123246	MS.gene022066	0.0001	0.0001	0.0001	0.0001	2.11983	6.8815	3.3328e-05	-14.8729	0.00905972	0.341577	down	yes
20504	u	chr1.1	.	78532704	78533028	MSTRG.10684.1	1	325	MSTRG.10684	.	0.0001	0.0001	0.0001	4.21929	4.2212	2.18393	2.82368e-05	-15.1121	0.00910745	0.34241	down	yes
275022	i	chr8.2	.	12348721	12349550	MSTRG.144798.1	1	830	MSTRG.144798	MS.gene041423	0.0001	0.0001	0.0001	3.12101	0.0001	2.94986	4.94155e-05	-14.3047	0.00918633	0.344406	down	yes
117824	u	chr3.4	.	26360500	26361066	MSTRG.61951.1	1	567	MSTRG.61951	.	0.0001	0.0001	0.0001	0.0001	2.42998	6.68139	3.29255e-05	-14.8904	0.00919012	0.34441	down	yes
42982	u	chr1.4	-	10992800	10994399	MSTRG.22747.1	3	920	MSTRG.22747	.	0.0001	0.21688	0.0001	1.00091	4.02142	5.11946	0.0214045	-5.54594	0.00919551	0.34447	down	yes
261075	i	chr7.4	.	66836431	66837269	MSTRG.137525.1	1	839	MSTRG.137525	MS.gene000584	0.90825	1.9957	1.10025	0.0001	0.0001	0.0001	13347.3	13.7043	0.00927282	0.345571	up	yes
57030	i	chr2.1	.	53692334	53692825	MSTRG.29972.1	1	492	MSTRG.29972	MS.gene060408	0.0001	5.23083	4.85744	0.0001	0.0001	0.0001	33627.9	15.0374	0.00928129	0.345748	up	yes
100851	i	chr3.2	.	65162959	65164145	MSTRG.53030.1	1	1187	MSTRG.53030	MS.gene99874	0.0001	2.605	1.61718	0.0001	0.0001	0.0001	14074.3	13.7808	0.00929473	0.345973	up	yes
33174	u	chr1.3	.	10451659	10452975	MSTRG.17411.1	1	1317	MSTRG.17411	.	1.33614	0.812179	0.508878	0.0001	0.0001	0.0001	8857.32	13.1127	0.00930406	0.346183	up	yes
26406	u	chr1.2	-	50062973	50065240	MSTRG.13755.1	2	2207	MSTRG.13755	.	0.130159	0.0001	0.0001	0.165657	0.428419	6.61195	0.0180903	-5.78864	0.0093107	0.346292	down	yes
84144	u	chr2.4	.	71737265	71737666	MSTRG.44107.1	1	402	MSTRG.44107	.	2.56231	1.88386	3.87303	0.0001	0.0001	0.0001	27730.7	14.7592	0.00934565	0.347316	up	yes
290046	j	chr8.3	+	61534329	61535710	MSTRG.152669.1	2	713	MSTRG.152669	MS.gene57677	0.0001	0.0001	0.0001	0.340109	1.86828	2.89096	5.88311e-05	-14.0531	0.0093811	0.348218	down	yes
284389	u	chr8.3	.	10784240	10784542	MSTRG.149651.1	1	303	MSTRG.149651	.	0.0001	0.0001	0.0001	10.8208	6.93435	0.0001	1.68964e-05	-15.8529	0.00939961	0.348628	down	yes
190702	x	chr5.3	-	61162791	61236887	MSTRG.100284.1	2	259	MSTRG.100284	MS.gene009603	0.158952	0.0001	0.423606	2.90308	17.7778	8.45598	0.0199973	-5.64405	0.00941355	0.348838	down	yes
242194	j	chr7.2	+	67729186	67731560	MSTRG.127637.2	5	482	MSTRG.127637	MS.gene000888	7.63909	3.66779	0.0001	0.0001	0.0001	0.0001	37690	15.2019	0.00943243	0.349153	up	yes
144562	u	chr4.2	.	73955449	73956328	MSTRG.76247.1	1	880	MSTRG.76247	.	0.0001	1.97783	3.56183	0.0001	0.0001	0.0001	18465.9	14.1726	0.00943966	0.349282	up	yes
88711	j	chr3.1	+	43757882	43759780	MSTRG.46584.2	3	676	MSTRG.46584	MS.gene94919	2.889	5.06557	0.0001	0.0001	0.0001	0.0001	26515.6	14.6946	0.00954892	0.352529	up	yes
85058	u	chr3.1	.	1484452	1484995	MSTRG.44618.1	1	544	MSTRG.44618	.	0.0001	0.0001	0.0001	1.14413	1.96698	3.1118	4.8209e-05	-14.3403	0.00954939	0.352529	down	yes
262691	u	chr7.4	-	87623963	87624874	MSTRG.138361.1	2	508	MSTRG.138361	.	0.0001	6.00992	3.82699	0.0001	0.0001	0.0001	32790	15.001	0.00955003	0.352529	up	yes
118802	o	chr3.4	-	44521608	44576970	MSTRG.62482.1	3	241	MSTRG.62482	MS.gene65966	9.55238	9.46429	4.91153	0.0001	0.403723	0.0001	59.2395	5.88849	0.00958637	0.353573	up	yes
265433	u	chr8.1	-	15076746	15079851	MSTRG.139777.1	3	282	MSTRG.139777	.	10.9066	8.04297	0.0001	0.0001	0.0001	0.0001	63165.6	15.9469	0.00962085	0.354165	up	yes
251196	u	chr7.3	.	58435405	58436876	MSTRG.132411.1	1	1472	MSTRG.132411	.	3.70347	1.07514	0.828386	0.112506	0.0001	0.0001	49.7488	5.63659	0.00966086	0.3548	up	yes
87085	u	chr3.1	.	23609826	23610065	MSTRG.45921.1	1	240	MSTRG.45921	.	3.76944	6.95933	3.31427	0.0001	0.0001	0.0001	46810.1	15.5145	0.00969656	0.355598	up	yes
171696	i	chr5.1	.	42863831	42864325	MSTRG.90432.1	1	495	MSTRG.90432	MS.gene96532	0.781542	2.18487	3.92606	0.0001	0.0001	0.0001	22974.9	14.4878	0.00971344	0.356031	up	yes
239730	u	chr7.2	.	34617932	34618273	MSTRG.126287.1	1	342	MSTRG.126287	.	3.43357	2.68374	3.49286	0.0001	0.0001	0.0001	32033.9	14.9673	0.00973528	0.356413	up	yes
166618	i	chr4.4	.	86213125	86214044	MSTRG.87797.1	1	920	MSTRG.87797	MS.gene052789	0.0001	0.0001	0.0001	2.08544	3.63467	0.0001	5.24457e-05	-14.2188	0.00976382	0.357178	down	yes
65370	u	chr2.2	-	54229626	54230939	MSTRG.34348.1	1	1314	MSTRG.34348	.	0.0001	0.040099	0.353778	0.754582	4.16697	7.49088	0.0317405	-4.97753	0.0097908	0.357745	down	yes
189221	u	chr5.3	.	46851184	46851417	MSTRG.99529.1	1	234	MSTRG.99529	.	0.0001	0.0001	0.0001	0.0001	15.0713	6.89468	1.36574e-05	-16.16	0.00983408	0.358625	down	yes
90147	u	chr3.1	.	57088262	57088965	MSTRG.47315.1	1	704	MSTRG.47315	.	0.977022	2.19545	1.54075	0.0001	0.0001	0.0001	15710.7	13.9395	0.0098469	0.358953	up	yes
224780	u	chr6.4	.	53122497	53122761	MSTRG.118414.1	1	265	MSTRG.118414	.	0.0001	0.0001	0.0001	0.0001	7.19719	11.6512	1.59164e-05	-15.9391	0.00987977	0.359871	down	yes
249389	i	chr7.3	.	35268041	35268386	MSTRG.131450.1	1	346	MSTRG.131450	MS.gene77415	2.32565	5.46207	1.95107	0.0001	0.0001	0.0001	32462.7	14.9865	0.00989077	0.360131	up	yes
32314	i	chr1.3	.	4132287	4132631	MSTRG.16922.1	1	345	MSTRG.16922	MS.gene67138	0.0001	0.0001	0.0001	0.0001	5.25264	9.2715	2.06551e-05	-15.5631	0.00990285	0.360431	down	yes
271185	i	chr8.1	.	69560113	69560853	MSTRG.142858.1	1	741	MSTRG.142858	MS.gene019486	0.0001	0.0001	0.0001	2.67982	4.42499	0.0001	4.22243e-05	-14.5316	0.00992155	0.360971	down	yes
108695	u	chr3.3	.	46569922	46570409	MSTRG.57144.1	1	488	MSTRG.57144	.	0.0001	0.0001	0.0001	0.0001	6.88286	3.52489	2.88244e-05	-15.0824	0.00994718	0.361622	down	yes
69729	u	chr2.3	.	12542599	12543677	MSTRG.36675.1	1	1079	MSTRG.36675	.	609.884	324.088	215.266	10.5321	74.7763	42.8467	8.96755	3.16471	0.0100018	0.362562	up	yes
145322	u	chr4.2	.	81571811	81572582	MSTRG.76650.1	1	772	MSTRG.76650	.	0.0001	0.0001	0.0001	0.0001	4.4449	2.13176	4.56152e-05	-14.4201	0.0100049	0.362562	down	yes
26443	u	chr1.2	.	50352741	50352979	MSTRG.13787.1	1	239	MSTRG.13787	.	0.0001	0.0001	0.0001	1.70611	8.82246	4.09134	2.052e-05	-15.5726	0.0100355	0.36328	down	yes
43365	i	chr1.4	.	14563460	14563742	MSTRG.22934.1	1	283	MSTRG.22934	MS.gene31860	0.0001	0.0001	0.0001	2.62161	3.73766	5.22827	2.58899e-05	-15.2373	0.0100553	0.363515	down	yes
20699	u	chr1.1	.	79858748	79860264	MSTRG.10780.1	1	1517	MSTRG.10780	.	0.0001	1.01872	2.13877	0.0001	0.0001	0.0001	10525.3	13.3616	0.0100564	0.363515	up	yes
72065	i	chr2.3	.	38647760	38648500	MSTRG.37862.1	1	741	MSTRG.37862	MS.gene84397	0.0001	3.11127	3.39367	0.0001	0.0001	0.0001	21683.5	14.4043	0.0100718	0.363749	up	yes
54496	u	chr2.1	.	22950459	22950672	MSTRG.28738.1	1	214	MSTRG.28738	.	0.0001	0.0001	0.0001	5.50129	8.09619	2.36908	1.87893e-05	-15.6997	0.0101052	0.364532	down	yes
133184	u	chr4.1	.	60422218	60422974	MSTRG.70271.1	1	757	MSTRG.70271	.	0.0001	0.0001	0.0001	4.65547	2.286	0.0001	4.32179e-05	-14.498	0.0101233	0.364904	down	yes
80142	i	chr2.4	.	31116199	31116612	MSTRG.42100.1	1	414	MSTRG.42100	MS.gene60915	5.83961	7.8407	1.21729	0.266682	0.0001	0.0001	55.8209	5.80273	0.0101575	0.365812	up	yes
254319	i	chr7.4	.	1653854	1654054	MSTRG.133953.1	1	201	MSTRG.133953	MS.gene22849	0.0001	0.0001	0.310564	7.2829	4.42228	12.7224	0.0127218	-6.29655	0.0101705	0.365826	down	yes
45374	u	chr1.4	+	36800427	36800874	MSTRG.23990.1	2	255	MSTRG.23990	.	0.0001	0.0001	0.0001	4.11369	16.845	0.0001	1.43138e-05	-16.0922	0.0102176	0.36703	down	yes
210895	u	chr6.2	+	37981106	37981785	MSTRG.110869.1	3	303	MSTRG.110869	.	0.0001	0.0001	0.0001	5.28864	2.25926	3.31438	2.76185e-05	-15.144	0.0102411	0.367592	down	yes
35781	u	chr1.3	.	37012823	37013263	MSTRG.18830.1	1	441	MSTRG.18830	.	0.0001	6.29062	4.72797	0.0001	0.0001	0.0001	36729	15.1646	0.0103082	0.369147	up	yes
230568	u	chr7.1	-	32855957	32856857	MSTRG.121522.1	2	815	MSTRG.121522	.	0.0001	0.0001	0.0001	1.46277	5.022	0.0001	4.62615e-05	-14.3998	0.0103222	0.36934	down	yes
291574	u	chr8.3	+	74947456	74948877	MSTRG.153459.1	2	519	MSTRG.153459	.	0.0001	0.0001	0.0001	1.29649	1.88542	3.1766	4.71809e-05	-14.3714	0.0103362	0.36934	down	yes
30197	u	chr1.2	.	76620365	76620604	MSTRG.15783.1	1	240	MSTRG.15783	.	0.0001	11.3062	8.72311	0.0001	0.0001	0.0001	66764.6	16.0268	0.0103792	0.369992	up	yes
178081	u	chr5.2	.	17223217	17223549	MSTRG.93778.1	1	333	MSTRG.93778	.	0.0001	0.0001	0.0001	9.77839	5.88541	0.0001	1.91523e-05	-15.6721	0.0103924	0.37018	down	yes
187101	u	chr5.3	.	18856456	18856695	MSTRG.98449.1	1	240	MSTRG.98449	.	0.0001	0.0001	0.0001	7.28878	2.68436	3.85481	2.16952e-05	-15.4923	0.0104537	0.371421	down	yes
139164	x	chr4.2	-	20022680	20023025	MSTRG.73473.1	2	308	MSTRG.73473	MS.gene90237	13.2117	4.04936	0.0001	0.0001	0.0001	0.0001	57537.2	15.8122	0.0104911	0.372394	up	yes
241731	u	chr7.2	.	61136225	61136432	MSTRG.127381.1	1	208	MSTRG.127381	.	0.0001	0.0001	0.0001	0.0001	12.9239	10.7298	1.26829e-05	-16.2668	0.010526	0.373372	down	yes
19883	u	chr1.1	+	74917604	74919313	MSTRG.10327.2	2	1324	MSTRG.10327	.	0.0001	0.0001	0.0001	3.17892	0.0001	0.698535	7.73684e-05	-13.6579	0.01053	0.373372	down	yes
101802	i	chr3.2	.	71740223	71740862	MSTRG.53522.1	1	640	MSTRG.53522	MS.gene71296	4.05463	0.350957	1.39673	0.0001	0.0001	0.0001	19341	14.2394	0.0105357	0.373435	up	yes
83154	u	chr2.4	.	64016721	64018055	MSTRG.43612.1	1	1335	MSTRG.43612	.	0.0001	1.17727	2.3585	0.0001	0.0001	0.0001	11786.2	13.5248	0.0105517	0.373858	up	yes
67288	o	chr2.2	+	69408428	69409178	MSTRG.35379.2	2	656	MSTRG.35379	MS.gene01397	2.06578	1.07636	1.74629	0.0001	0.0001	0.0001	16294.8	13.9921	0.0106279	0.375706	up	yes
166527	u	chr4.4	.	85741653	85742256	MSTRG.87726.1	1	604	MSTRG.87726	.	0.0001	0.0001	0.0001	5.70674	2.84896	0.0001	3.50639e-05	-14.7997	0.0106511	0.37619	down	yes
117675	o	chr3.4	-	24398511	24779175	MSTRG.61952.2	2	317	MSTRG.61952	MS.gene95527	5.68889	5.96355	3.35593	0.0001	0.04699	0.0001	318.041	8.31307	0.0106761	0.376564	up	yes
4787	u	39708	.	12906	13117	MSTRG.2133.1	1	212	MSTRG.2133	.	0.0001	0.0001	0.0001	7.98075	3.08069	4.52167	1.92516e-05	-15.6647	0.0106872	0.376564	down	yes
237729	u	chr7.2	.	19416199	19416933	MSTRG.125221.1	1	735	MSTRG.125221	.	0.0001	0.0001	0.0001	0.150213	2.4503	2.51253	5.86734e-05	-14.0569	0.0106884	0.376564	down	yes
174550	u	chr5.1	.	71272908	71273253	MSTRG.91908.1	1	346	MSTRG.91908	.	4.49133	5.55868	0.590447	0.0001	0.0001	0.0001	35468.2	15.1142	0.0107278	0.377244	up	yes
263821	i	chr8.1	.	3321868	3322340	MSTRG.138944.1	1	473	MSTRG.138944	MS.gene035642	0.0001	0.0001	0.0001	2.23981	0.992954	3.64219	4.36367e-05	-14.4841	0.0107308	0.377244	down	yes
37723	i	chr1.3	.	55714851	55715176	MSTRG.19843.1	1	326	MSTRG.19843	MS.gene07510	2.36259	3.89114	3.45177	0.0001	0.0001	0.0001	32351.7	14.9816	0.0107585	0.377554	up	yes
193821	x	chr5.4	+	5855921	5862066	MSTRG.101901.1	2	227	MSTRG.101901	MS.gene015499	8.96938	16.2619	7.04982	0.0001	0.0001	0.704822	45.7873	5.51688	0.0108155	0.3789	up	yes
247954	u	chr7.3	.	23915702	23916828	MSTRG.130637.1	1	1127	MSTRG.130637	.	39.1153	46.249	46.3681	5.99774	0.173899	0.0001	21.3445	4.41579	0.010825	0.378946	up	yes
21145	u	chr1.2	.	52197	52432	MSTRG.11012.1	1	236	MSTRG.11012	.	0.0001	0.0001	0.0001	5.64153	8.56504	0.936995	1.98104e-05	-15.6234	0.0108391	0.379156	down	yes
236558	u	chr7.2	.	10702132	10702400	MSTRG.124598.1	1	269	MSTRG.124598	.	1.05317	0.381923	0.0001	16.3824	12.892	7.90636	0.0386005	-4.69524	0.010859	0.379569	down	yes
215601	u	chr6.3	.	10531500	10531914	MSTRG.113512.1	1	415	MSTRG.113512	.	0.0001	4.19396	7.07989	0.0001	0.0001	0.0001	37579.8	15.1977	0.0109063	0.380557	up	yes
221511	u	chr6.4	.	2701489	2701870	MSTRG.116693.1	1	382	MSTRG.116693	.	0.0001	0.0001	0.0001	0.911136	3.90062	3.97025	3.41608e-05	-14.8373	0.0109454	0.381308	down	yes
118718	u	chr3.4	.	43614653	43614916	MSTRG.62424.1	1	264	MSTRG.62424	.	0.0001	13.3301	5.17329	0.0001	0.0001	0.0001	61678.1	15.9125	0.0109538	0.381317	up	yes
215313	u	chr6.3	.	7915894	7916217	MSTRG.113355.1	1	324	MSTRG.113355	.	0.0001	0.0001	0.0001	3.80999	12.0249	0.0001	1.89454e-05	-15.6878	0.0110208	0.382936	down	yes
103036	j	chr3.2	-	79417602	79418775	MSTRG.54188.1	2	1037	MSTRG.54188	MS.gene06473	0.0001	0.0001	0.0001	0.0001	4.09225	0.856547	6.06196e-05	-14.0099	0.0110255	0.382956	down	yes
246000	u	chr7.3	-	9897103	9902233	MSTRG.129637.1	2	816	MSTRG.129637	.	0.0001	0.0001	0.0001	1.93768	1.48223	0.607103	7.4497e-05	-13.7125	0.0110374	0.383085	down	yes
266769	u	chr8.1	.	25150348	25151506	MSTRG.140567.1	1	1159	MSTRG.140567	.	0.0001	0.0001	0.0001	2.11103	0.0001	1.98581	7.32253e-05	-13.7373	0.0111786	0.386552	down	yes
231912	u	chr7.1	-	49279321	49280356	MSTRG.122215.1	2	920	MSTRG.122215	.	0.0001	0.0001	0.0001	2.13735	3.38737	0.0001	5.43005e-05	-14.1687	0.0111997	0.387137	down	yes
6783	u	42764	.	31680	32423	MSTRG.3705.1	1	744	MSTRG.3705	.	0.0001	2.8759	3.34783	0.0001	0.0001	0.0001	20746.1	14.3406	0.011258	0.388483	up	yes
249238	i	chr7.3	.	33509482	33509812	MSTRG.131372.1	1	331	MSTRG.131372	MS.gene42132	3.54947	4.07608	2.01449	0.0001	0.0001	0.0001	32133.5	14.9718	0.0112594	0.388483	up	yes
240355	u	chr7.2	.	41383040	41383547	MSTRG.126626.1	1	508	MSTRG.126626	.	0.0001	2.67353	6.42717	0.0001	0.0001	0.0001	30336	14.8887	0.0112729	0.388556	up	yes
37079	u	chr1.3	.	49485709	49485963	MSTRG.19501.1	1	255	MSTRG.19501	.	3.29096	1.19979	8.55122	0.0001	0.0001	0.0001	43473.3	15.4078	0.0113885	0.391535	up	yes
52644	u	chr2.1	.	7180183	7181904	MSTRG.27800.1	1	1722	MSTRG.27800	.	0.0001	0.061197	0.0001	6.87648	0.698679	0.0001	0.00810493	-6.94698	0.0113897	0.391535	down	yes
44585	i	chr1.4	.	26958673	26959308	MSTRG.23600.1	1	636	MSTRG.23600	MS.gene053374	0.0001	0.0001	0.104842	6.37294	1.26473	0.77679	0.0124835	-6.32383	0.0114294	0.392322	down	yes
187924	u	chr5.3	.	25849297	25849516	MSTRG.98869.1	1	220	MSTRG.98869	.	0.0001	12.9057	8.54237	0.0001	0.0001	0.0001	71493.9	16.1255	0.0114354	0.392383	up	yes
15685	u	chr1.1	.	44838169	44838613	MSTRG.8048.1	1	445	MSTRG.8048	.	0.0001	0.0001	0.0001	7.76457	0.0001	3.16602	2.74456e-05	-15.1531	0.0114448	0.392418	down	yes
78692	u	chr2.4	.	16755488	16755789	MSTRG.41365.1	1	302	MSTRG.41365	.	0.0001	0.0001	0.0001	6.82585	9.79875	0.0001	1.80454e-05	-15.758	0.0114635	0.392484	down	yes
133587	u	chr4.1	.	66526667	66527122	MSTRG.70485.1	1	456	MSTRG.70485	.	0.0001	0.0001	0.0001	0.197473	2.12228	5.68046	3.7499e-05	-14.7028	0.0115764	0.395302	down	yes
297823	u	chr8.4	.	41890993	41891865	MSTRG.156656.1	1	873	MSTRG.156656	.	0.0001	3.10433	2.26918	0.0001	0.0001	0.0001	17912	14.1286	0.0115966	0.395737	up	yes
273320	u	chr8.2	.	569020	569903	MSTRG.143957.1	1	884	MSTRG.143957	.	0.0001	0.0001	0.0001	1.60081	0.0001	3.67402	5.68727e-05	-14.1019	0.0116255	0.396433	down	yes
151616	u	chr4.3	.	33411177	33411701	MSTRG.80013.1	1	525	MSTRG.80013	.	3.56935	4.0282	1.64571	0.134233	0.0001	0.0001	68.7573	6.10344	0.0116858	0.397474	up	yes
178116	o	chr5.2	+	17423108	17670501	MSTRG.93877.1	2	219	MSTRG.93877	MS.gene84999	3.76128	1.6195	9.25942	0.0001	0.0001	0.0001	48800.7	15.5746	0.0117054	0.397606	up	yes
2299	u	23017	.	12185	12394	MSTRG.1014.1	1	210	MSTRG.1014	.	11.037	0.0001	11.5314	0.0001	0.0001	0.0001	75228.4	16.199	0.0117073	0.397606	up	yes
91021	u	chr3.1	.	63615997	63616850	MSTRG.47800.1	1	854	MSTRG.47800	.	2.90879	0.0001	0.0001	15.3643	12.248	63.9255	0.0317791	-4.97578	0.0117082	0.397606	down	yes
202561	u	chr6.1	-	10412771	10414082	MSTRG.106440.1	2	1021	MSTRG.106440	.	1.02606	2.09538	0.256909	0.0001	0.0001	0.0001	11261.2	13.4591	0.0117336	0.398088	up	yes
219210	u	chr6.3	.	63723004	63723221	MSTRG.115406.1	1	218	MSTRG.115406	.	2.69467	4.83522	6.46013	0.0001	0.0001	0.0001	46633.4	15.5091	0.0117447	0.39832	up	yes
6765	u	42749	.	15999	16267	MSTRG.3692.1	1	269	MSTRG.3692	.	0.0001	0.0001	0.0001	3.78534	7.26671	1.30815	2.42714e-05	-15.3304	0.0117652	0.398868	down	yes
120529	u	chr3.4	-	62955471	62955920	MSTRG.63481.1	1	450	MSTRG.63481	.	2.74772	2.62887	7.28273	0.122674	0.21776	0.0001	37.1749	5.21626	0.0117876	0.399484	up	yes
195437	u	chr5.4	+	17695547	17697386	MSTRG.102750.1	1	1840	MSTRG.102750	.	0.0001	2.66134	2.74811	0.060004	0.0001	0.0001	89.8537	6.48951	0.0119723	0.403548	up	yes
61583	u	chr2.2	.	10849403	10849677	MSTRG.32391.1	1	275	MSTRG.32391	.	5.52105	2.36379	3.42555	0.0001	0.0001	0.0001	37701.3	15.2023	0.0119904	0.404013	up	yes
291147	u	chr8.3	.	71546898	71547272	MSTRG.153256.1	1	375	MSTRG.153256	.	8.0912	2.70441	0.147546	0.0001	0.0001	0.0001	36477.2	15.1547	0.0120619	0.406128	up	yes
27834	u	chr1.2	.	61346330	61347110	MSTRG.14506.1	1	781	MSTRG.14506	.	1.47193	21.5886	24.3525	0.833404	1.88583	1.62287	10.9194	3.44882	0.0120939	0.406331	up	yes
120685	u	chr3.4	.	64595160	64595619	MSTRG.63384.1	1	460	MSTRG.63384	.	2.06953	2.73019	1.77819	0.0001	0.0001	0.0001	21926.4	14.4204	0.0121124	0.406528	up	yes
217129	u	chr6.3	-	27314394	27315381	MSTRG.114319.1	3	536	MSTRG.114319	.	2.05757	3.60446	0.554959	0.0001	0.0001	0.0001	20723.3	14.339	0.0121538	0.406843	up	yes
203054	i	chr6.1	-	16822115	16822384	MSTRG.106727.1	2	250	MSTRG.106727	MS.gene85722	6.0065	4.07324	2.41301	0.0001	0.0001	0.0001	41642.5	15.3458	0.0121559	0.406843	up	yes
253440	u	chr7.3	.	85192915	85193637	MSTRG.133568.1	1	723	MSTRG.133568	.	0.0001	0.0001	0.0001	0.672682	1.54611	2.05315	7.02256e-05	-13.7976	0.012157	0.406843	down	yes
256892	u	chr7.4	.	19726544	19727079	MSTRG.135274.1	1	536	MSTRG.135274	.	3.19817	6.03633	0.0001	0.0001	0.0001	0.0001	30782	14.9098	0.0122139	0.408598	up	yes
297101	i	chr8.4	.	35363397	35363845	MSTRG.156316.1	1	449	MSTRG.156316	MS.gene47472	0.0001	0.0001	0.0001	1.31725	2.18684	3.33776	4.38478e-05	-14.4771	0.01222	0.408658	down	yes
219827	o	chr6.3	-	70650980	70706326	MSTRG.115797.1	3	421	MSTRG.115797	MS.gene041710	9.49453	2.67495	0.0001	0.0001	0.0001	0.0001	40565.2	15.308	0.0122376	0.409099	up	yes
200437	u	chr5.4	.	70404771	70405548	MSTRG.105344.1	1	778	MSTRG.105344	.	0.0001	0.0001	0.0001	0.0001	1.84107	4.17818	4.98393e-05	-14.2924	0.0122903	0.410568	down	yes
180888	u	chr5.2	-	51484489	51484801	MSTRG.95210.1	1	313	MSTRG.95210	.	12.7059	0.0001	3.265	0.0001	0.0001	0.0001	53236.8	15.7001	0.0123336	0.411427	up	yes
169756	u	chr5.1	.	19532679	19533007	MSTRG.89467.1	1	329	MSTRG.89467	.	0.0001	7.50267	6.36049	0.0001	0.0001	0.0001	46210.9	15.4959	0.0123418	0.411554	up	yes
178226	u	chr5.2	.	18142636	18142850	MSTRG.93839.1	1	215	MSTRG.93839	.	0.0001	0.0001	0.0001	5.37191	5.46933	3.35814	2.11277e-05	-15.5305	0.0123847	0.412264	down	yes
77501	u	chr2.4	.	7287835	7288901	MSTRG.40751.1	1	1067	MSTRG.40751	.	0.0001	2.0485	2.16667	0.0001	0.0001	0.0001	14050.9	13.7784	0.0123888	0.412264	up	yes
196292	u	chr5.4	.	24480319	24480557	MSTRG.103219.1	1	239	MSTRG.103219	.	0.0001	0.0001	0.0001	4.7563	5.84481	2.44021	2.30038e-05	-15.4078	0.0124301	0.413099	down	yes
262253	u	chr7.4	.	82578094	82578595	MSTRG.138099.1	1	502	MSTRG.138099	.	0.0001	0.0001	0.0001	0.0001	2.34106	7.0351	3.19957e-05	-14.9318	0.0124323	0.413099	down	yes
134795	u	chr4.1	+	78240972	78242629	MSTRG.71070.1	3	728	MSTRG.71070	.	0.230549	0.0001	0.0001	2.32373	2.42845	4.88422	0.0239456	-5.3841	0.0124695	0.414041	down	yes
274613	u	chr8.2	-	9547229	9547909	MSTRG.144594.1	1	681	MSTRG.144594	.	1.91204	3.16785	1.5039	6.65905	27.072	22.341	0.117417	-3.09029	0.0125406	0.415352	down	yes
152753	u	chr4.3	.	43116463	43116954	MSTRG.80579.1	1	492	MSTRG.80579	.	0.0001	0.0001	0.0001	0.0001	1.8222	7.75032	3.13394e-05	-14.9617	0.0125446	0.415352	down	yes
268994	i	chr8.1	+	43729954	43730230	MSTRG.141770.1	1	277	MSTRG.141770	MS.gene63147	0.0001	0.0001	0.0001	5.92356	6.90714	0.366053	2.27329e-05	-15.4249	0.0126445	0.417866	down	yes
165771	u	chr4.4	.	78662373	78662862	MSTRG.87377.1	1	490	MSTRG.87377	.	3.58805	0.543442	2.41471	0.0001	0.0001	0.0001	21820.7	14.4134	0.0126757	0.418362	up	yes
104565	u	chr3.2	+	89434275	89436529	MSTRG.54972.1	2	815	MSTRG.54972	.	1.01328	1.94502	0.786316	0.0001	0.0001	0.0001	12482	13.6076	0.0127084	0.419046	up	yes
250423	u	chr7.3	-	47792043	47792726	MSTRG.132009.1	2	645	MSTRG.132009	.	0.0001	4.77409	2.38639	0.0001	0.0001	0.0001	23868.6	14.5428	0.0127099	0.419046	up	yes
91545	u	chr3.1	.	66982464	66983082	MSTRG.48078.1	1	619	MSTRG.48078	.	0.0001	5.09147	2.36987	0.0001	0.0001	0.0001	24871.5	14.6022	0.0127287	0.419519	up	yes
65246	u	chr2.2	.	53105500	53105887	MSTRG.34286.1	1	388	MSTRG.34286	.	0.0001	0.0001	0.0001	3.70969	1.7876	2.24101	3.87682e-05	-14.6548	0.0127543	0.420213	down	yes
271179	u	chr8.1	.	69534436	69534656	MSTRG.142846.1	1	221	MSTRG.142846	.	0.0001	0.0001	0.0001	0.825541	6.77684	7.29212	2.01417e-05	-15.5995	0.0127672	0.420489	down	yes
155493	i	chr4.3	-	77858389	77858592	MSTRG.81902.2	1	204	MSTRG.81902	MS.gene037734	0.0001	0.0001	0.0001	0.0001	6.20031	16.4376	1.3252e-05	-16.2034	0.0128221	0.421812	down	yes
12261	i	chr1.1	.	8251132	8251498	MSTRG.6321.1	1	367	MSTRG.6321	MS.gene33175	0.0001	0.0001	0.0001	2.3544	4.25699	1.70768	3.60617e-05	-14.7592	0.0128928	0.423138	down	yes
213550	u	chr6.2	.	80449947	80450334	MSTRG.112396.1	1	388	MSTRG.112396	.	0.648863	2.33344	5.15076	0.0001	0.0001	0.0001	27110.2	14.7265	0.0129492	0.424243	up	yes
241586	u	chr7.2	.	56922228	56922603	MSTRG.127303.1	1	376	MSTRG.127303	.	0.0001	0.0001	0.0001	7.57981	0.0001	4.59446	2.46419e-05	-15.3085	0.0130074	0.425185	down	yes
65876	x	chr2.2	-	58835095	58836649	MSTRG.34594.1	2	310	MSTRG.34594	MS.gene02038	7.5696	1.84333	7.90208	0.330385	0.0001	0.0001	52.3769	5.71086	0.0130659	0.426115	up	yes
222717	u	chr6.4	-	19930727	19936213	MSTRG.117306.1	2	323	MSTRG.117306	.	3.17546	0.0001	10.956	0.0001	0.0001	0.0001	47105.4	15.5236	0.0130779	0.426115	up	yes
186302	u	chr5.3	.	12389899	12390410	MSTRG.98028.1	1	512	MSTRG.98028	.	1.94478	0.0001	6.88759	0.0001	0.0001	0.0001	29441.6	14.8456	0.0130789	0.426115	up	yes
242788	u	chr7.2	-	74347574	74351044	MSTRG.127909.1	2	229	MSTRG.127909	.	0.80503	5.81782	7.06936	0.0001	0.0001	0.0001	45640.7	15.478	0.0131018	0.426404	up	yes
284111	u	chr8.3	.	8519198	8519577	MSTRG.149493.1	1	380	MSTRG.149493	.	0.61397	2.83085	4.72282	0.0001	0.0001	0.0001	27225.5	14.7327	0.0131382	0.427144	up	yes
240010	u	chr7.2	+	37317775	37318583	MSTRG.126428.1	2	455	MSTRG.126428	.	3.62991	1.81467	1.28567	0.0001	0.0001	0.0001	22434.2	14.4534	0.0131568	0.427477	up	yes
38852	u	chr1.3	.	63190477	63190807	MSTRG.20456.1	1	331	MSTRG.20456	.	0.0001	0.0001	0.0001	0.0001	6.73458	7.14128	2.16201e-05	-15.4973	0.0131632	0.427477	down	yes
259280	u	chr7.4	.	39297024	39297328	MSTRG.136546.1	1	305	MSTRG.136546	.	0.0001	0.0001	0.0001	0.0001	9.55198	5.66576	1.97137e-05	-15.6304	0.0131857	0.427645	down	yes
135645	i	chr4.1	.	86201731	86202547	MSTRG.71554.1	1	817	MSTRG.71554	MS.gene026719	0.0001	0.0001	0.0001	1.05665	1.40527	1.11698	8.38247e-05	-13.5423	0.0132336	0.428839	down	yes
50623	u	chr1.4	.	82018069	82018491	MSTRG.26706.1	1	423	MSTRG.26706	.	0.0001	0.0001	0.0001	0.891314	2.39218	3.90929	4.17085e-05	-14.5493	0.0133701	0.431978	down	yes
155093	i	chr4.3	.	74166387	74166686	MSTRG.81700.1	1	300	MSTRG.81700	MS.gene48985	0.0001	0.0001	0.0001	2.0202	4.24633	3.56446	3.05157e-05	-15.0001	0.0134297	0.433304	down	yes
43795	u	chr1.4	+	18593677	18595492	MSTRG.23171.1	2	651	MSTRG.23171	.	0.0001	0.0001	0.0001	1.41028	2.96674	0.459533	6.20276e-05	-13.9767	0.0134583	0.434042	down	yes
63105	u	chr2.2	.	25278487	25279747	MSTRG.33200.1	1	1261	MSTRG.33200	.	0.996992	0.616289	0.701919	0.0001	0.0001	0.0001	7717.33	12.9139	0.0134618	0.434042	up	yes
272581	u	chr8.1	+	82277387	82280877	MSTRG.143568.2	2	366	MSTRG.143568	.	0.0001	0.0001	0.0001	4.96717	2.39825	1.24438	3.4844e-05	-14.8087	0.0134864	0.434275	down	yes
79430	u	chr2.4	.	23979758	23979962	MSTRG.41778.1	1	205	MSTRG.41778	.	0.769372	0.0001	0.0001	20.3822	3.18561	12.3497	0.0214261	-5.54448	0.0135292	0.434864	down	yes
169613	u	chr5.1	.	17848658	17849164	MSTRG.89402.1	1	507	MSTRG.89402	.	0.0001	0.0001	0.0001	0.0001	5.17095	3.79987	3.34414e-05	-14.868	0.0136172	0.436792	down	yes
155921	i	chr4.3	+	82921946	82923094	MSTRG.82169.1	1	1149	MSTRG.82169	MS.gene47830	7.51642	0.0001	6.16957	0.192178	0.0001	0.0001	71.1417	6.15262	0.0136351	0.437216	up	yes
201763	u	chr6.1	.	2433350	2436677	MSTRG.106048.1	1	3328	MSTRG.106048	.	0.648528	0.610527	1.41819	7.87637	12.665	2.46646	0.116362	-3.1033	0.0136401	0.437226	down	yes
29669	u	chr1.2	.	73622920	73623193	MSTRG.15493.1	1	274	MSTRG.15493	.	2.71956	3.00308	4.7161	0.0001	0.0001	0.0001	34795.8	15.0866	0.0136699	0.437664	up	yes
225002	i	chr6.4	.	55118789	55119032	MSTRG.118554.1	1	244	MSTRG.118554	MS.gene81893	0.0001	0.0001	0.0001	1.73613	3.31255	7.22465	2.44433e-05	-15.3202	0.013672	0.437664	down	yes
34691	u	chr1.3	-	24009884	24010159	MSTRG.18283.1	1	276	MSTRG.18283	.	7.4578	3.80174	0.709357	0.0001	0.0001	0.0001	39896.3	15.284	0.0136727	0.437664	up	yes
107912	u	chr3.3	.	37248856	37249171	MSTRG.56754.1	1	316	MSTRG.56754	.	0.0001	0.0001	0.0001	5.65958	3.4793	0.92849	2.97993e-05	-15.0344	0.0136772	0.437664	down	yes
62446	u	chr2.2	.	17705023	17705243	MSTRG.32857.1	1	221	MSTRG.32857	.	9.37332	0.713977	4.89381	0.0001	0.0001	0.0001	49937	15.6078	0.0137766	0.439343	up	yes
135064	u	chr4.1	.	80818599	80818990	MSTRG.71232.1	1	392	MSTRG.71232	.	0.0001	0.0001	0.0001	6.83598	5.27529	0.0001	2.47701e-05	-15.301	0.0138377	0.440692	down	yes
273309	u	chr8.2	-	517694	519068	MSTRG.143951.1	2	786	MSTRG.143951	.	0.0001	0.0001	0.0001	4.30474	1.79978	0.0001	4.91431e-05	-14.3127	0.013857	0.441153	down	yes
127567	u	chr4.1	.	11498471	11498716	MSTRG.67158.1	1	246	MSTRG.67158	.	4.29687	0.978057	7.12817	0.0001	0.0001	0.0001	41343.6	15.3354	0.0139169	0.442351	up	yes
21272	o	chr1.2	+	894192	895524	MSTRG.11076.2	2	1298	MSTRG.11076	MS.gene24158	0.645443	0.0001	0.018945	1.01059	7.74967	6.41742	0.0437806	-4.51356	0.0139624	0.443293	down	yes
239739	u	chr7.2	.	34640693	34641767	MSTRG.126299.1	1	1075	MSTRG.126299	.	1.08626	1.28439	0.405158	0.0001	0.0001	0.0001	9252.71	13.1757	0.0139668	0.443293	up	yes
230087	u	chr7.1	.	27828104	27828986	MSTRG.121264.1	1	883	MSTRG.121264	.	0.45666	1.41389	1.38015	0.0001	0.0001	0.0001	10835.7	13.4035	0.0140053	0.444201	up	yes
288966	u	chr8.3	.	49458801	49462061	MSTRG.152154.1	1	3261	MSTRG.152154	.	1.95791	3.28624	2.21276	0.454063	0.134265	0.239212	9.01093	3.17168	0.0140097	0.444201	up	yes
122069	o	chr3.4	+	75599003	75628021	MSTRG.64227.1	2	290	MSTRG.64227	MS.gene044124	0.0001	7.3569	7.70345	0.0001	0.0001	0.0001	50201.5	15.6154	0.0140174	0.444233	up	yes
154195	u	chr4.3	.	63672201	63672584	MSTRG.81284.1	1	384	MSTRG.81284	.	0.0001	0.0001	0.0001	1.91474	2.0786	3.43738	4.03729e-05	-14.5963	0.0140355	0.444416	down	yes
97394	u	chr3.2	.	22732896	22733485	MSTRG.51257.1	1	590	MSTRG.51257	.	0.0001	0.0001	0.0001	0.0001	6.27602	1.63753	3.79092e-05	-14.6871	0.0140641	0.445022	down	yes
192655	u	chr5.3	.	77934860	77935154	MSTRG.101284.1	1	295	MSTRG.101284	.	1.67052	3.7323	4.29141	0.0001	0.0001	0.0001	32314.1	14.9799	0.0140833	0.445478	up	yes
23664	u	chr1.2	.	19225514	19225925	MSTRG.12439.1	1	412	MSTRG.12439	.	3.73544	0.952895	2.52637	0.0001	0.0001	0.0001	24049	14.5537	0.0141331	0.446402	up	yes
210266	u	chr6.2	+	28251403	28252592	MSTRG.110605.1	1	1190	MSTRG.110605	.	0.078357	0.049515	0.055106	0.072819	4.23373	2.09091	0.0286017	-5.12776	0.0141937	0.447608	down	yes
21775	u	chr1.2	-	4280126	4280748	MSTRG.11374.1	2	480	MSTRG.11374	.	0.0001	0.0001	0.0001	2.50758	2.56998	1.10065	4.85578e-05	-14.3299	0.0142059	0.44784	down	yes
213347	u	chr6.2	.	78447248	78447815	MSTRG.112259.1	1	568	MSTRG.112259	.	1.04365	2.47973	1.54693	0.0001	0.0001	0.0001	16901	14.0448	0.0142203	0.447991	up	yes
64621	u	chr2.2	.	46936669	46937071	MSTRG.33960.1	1	403	MSTRG.33960	.	0.0001	0.0001	0.0001	4.6588	0.0001	6.27963	2.7426e-05	-15.1541	0.014376	0.451013	down	yes
102145	j	chr3.2	-	73720882	73722433	MSTRG.53715.1	3	593	MSTRG.53715	MS.gene77451	0.0001	0.0001	0.0001	2.31451	2.19876	0.562809	5.91007e-05	-14.0465	0.0143969	0.451147	down	yes
294238	i	chr8.4	.	12172075	12172306	MSTRG.154847.1	1	232	MSTRG.154847	MS.gene036493	0.643288	4.53742	8.08422	0.0001	0.0001	0.0001	44216.4	15.4323	0.0144123	0.451305	up	yes
149043	u	chr4.3	-	16501002	16501468	MSTRG.78616.1	1	467	MSTRG.78616	.	14.8845	118.782	25.4917	0.0001	3.69444	5.50908	17.2929	4.11211	0.0145439	0.454664	up	yes
173194	u	chr5.1	-	59105433	59106010	MSTRG.91218.1	1	578	MSTRG.91218	.	2.30244	2.1824	2.96752	0.0001	0.06573	0.0001	113.034	6.82062	0.0145894	0.455736	up	yes
217276	o	chr6.3	+	29702547	29780181	MSTRG.114408.1	2	378	MSTRG.114408	MS.gene80424	15.4619	11.8349	7.81356	1.1442	0.5148	1.34884	11.673	3.5451	0.0146172	0.455736	up	yes
143338	u	chr4.2	.	54712404	54712655	MSTRG.75665.1	1	252	MSTRG.75665	.	0.0001	0.0001	0.0001	0.0001	3.14285	14.7582	1.67587e-05	-15.8647	0.0146269	0.455887	down	yes
241385	x	chr7.2	-	53910827	53914887	MSTRG.127198.1	2	297	MSTRG.127198	MS.gene010876	0.0001	0.0001	0.0001	2.74685	1.20909	6.09644	2.98437e-05	-15.0322	0.0147001	0.458015	down	yes
254292	x	chr7.4	+	1524847	1531196	MSTRG.133938.1	2	454	MSTRG.133938	MS.gene22838	0.0001	0.0001	0.0001	7.38454	0.0001	2.57607	3.01183e-05	-15.019	0.0148052	0.460522	down	yes
251191	u	chr7.3	-	58234043	58236080	MSTRG.132412.1	2	413	MSTRG.132412	.	0.738804	4.6752	1.95002	0.0001	0.0001	0.0001	24546.7	14.5832	0.0148139	0.460641	up	yes
7852	u	50552	.	201744	202360	MSTRG.4210.1	1	617	MSTRG.4210	.	2.44726	2.75264	0.214608	0.0001	0.0001	0.0001	18048.3	14.1396	0.0148342	0.461116	up	yes
259781	u	chr7.4	-	45380252	45380538	MSTRG.136872.1	2	205	MSTRG.136872	.	0.0001	0.0001	0.0001	0.800212	8.79573	5.78369	1.95063e-05	-15.6457	0.0148717	0.461516	down	yes
103451	i	chr3.2	.	82107144	82107872	MSTRG.54396.1	1	729	MSTRG.54396	MS.gene055535	0.101237	0.0001	0.0001	1.75321	1.18404	3.25357	0.0163851	-5.93148	0.0150221	0.463747	down	yes
91315	i	chr3.1	.	65450066	65450350	MSTRG.47953.1	1	285	MSTRG.47953	MS.gene79892	4.09313	1.22104	4.67926	0.0001	0.0001	0.0001	33311.5	15.0237	0.0150329	0.463747	up	yes
170047	u	chr5.1	.	22069363	22069676	MSTRG.89617.1	1	314	MSTRG.89617	.	5.75083	0.0001	8.11493	0.0001	0.0001	0.0001	46219.5	15.4962	0.0151211	0.465671	up	yes
252245	u	chr7.3	.	72821967	72822171	MSTRG.132904.1	1	205	MSTRG.132904	.	5.58883	1.26026	7.2735	0.0001	0.0001	0.0001	47075.3	15.5227	0.0151251	0.465671	up	yes
166563	u	chr4.4	.	85974962	85975375	MSTRG.87754.1	1	414	MSTRG.87754	.	0.0001	0.0001	0.0001	2.62237	0.420233	4.33776	4.06484e-05	-14.5864	0.0152151	0.467468	down	yes
218868	u	chr6.3	.	56771913	56772410	MSTRG.115230.1	1	498	MSTRG.115230	.	0.0001	0.0001	0.0001	3.44971	0.777317	1.62814	5.12368e-05	-14.2525	0.0152588	0.468399	down	yes
146650	u	chr4.3	.	32392	32812	MSTRG.77364.1	1	421	MSTRG.77364	.	0.0001	0.0001	0.0001	4.71767	0.465521	2.2479	4.03709e-05	-14.5963	0.0152832	0.468994	down	yes
270402	u	chr8.1	.	61667610	61668033	MSTRG.142432.1	1	424	MSTRG.142432	.	0.0001	0.0001	0.0001	0.662061	3.4667	2.68485	4.40295e-05	-14.4712	0.0154319	0.472316	down	yes
2305	u	23204	.	25458	26291	MSTRG.1019.1	1	834	MSTRG.1019	.	0.0001	0.0001	0.0001	4.15009	0.0001	1.27543	5.52933e-05	-14.1425	0.0154463	0.472602	down	yes
224055	u	chr6.4	.	45154475	45154802	MSTRG.117982.1	1	328	MSTRG.117982	.	1.19428	0.0001	0.0001	7.65396	6.18733	21.4193	0.0338758	-4.8836	0.0154652	0.473006	down	yes
159884	u	chr4.4	-	20502403	20505763	MSTRG.84279.1	3	548	MSTRG.84279	.	0.0001	0.0001	0.0001	0.0001	5.26498	2.75638	3.73997e-05	-14.7066	0.0155909	0.475743	down	yes
115900	u	chr3.4	.	4148406	4149580	MSTRG.60978.1	1	1175	MSTRG.60978	.	16.6664	0.045325	0.693727	0.0001	0.0001	0.264903	65.6555	6.03684	0.0156347	0.476652	up	yes
83358	u	chr2.4	.	65975530	65976172	MSTRG.43696.1	1	643	MSTRG.43696	.	0.0001	0.0001	0.0001	1.78494	1.62558	0.867871	7.01198e-05	-13.7998	0.0157144	0.478424	down	yes
44058	u	chr1.4	.	21084035	21084293	MSTRG.23298.1	1	259	MSTRG.23298	.	0.0001	8.06829	8.25939	0.0001	0.0001	0.0001	54425.9	15.732	0.0157765	0.479199	up	yes
35784	u	chr1.3	.	37035023	37035588	MSTRG.18833.1	1	566	MSTRG.18833	.	0.0001	3.53086	3.88788	0.0001	0.0001	0.0001	24729.5	14.5939	0.015863	0.480992	up	yes
87422	u	chr3.1	-	28540126	28542507	MSTRG.45946.1	2	556	MSTRG.45946	.	0.0001	0.0001	0.0001	4.22342	3.9687	0.0001	3.66201e-05	-14.737	0.0158985	0.481866	down	yes
10264	u	6802	+	31595	39990	MSTRG.5313.1	2	821	MSTRG.5313	.	0.0001	0.373847	0.417445	1.81762	6.04189	7.37777	0.0519379	-4.26707	0.0159326	0.482745	down	yes
14917	i	chr1.1	-	34899820	34900642	MSTRG.7690.2	1	823	MSTRG.7690	MS.gene073631	2.32525	0.187708	0.0001	4.99578	31.4191	6.87319	0.0580544	-4.10645	0.0159484	0.482909	down	yes
83315	u	chr2.4	.	65612083	65612649	MSTRG.43686.1	1	567	MSTRG.43686	.	6.18058	10.5306	0.0001	0.19472	0.0001	0.0001	85.7341	6.4218	0.0161677	0.48797	up	yes
55365	u	chr2.1	+	31720884	31721706	MSTRG.29161.1	2	738	MSTRG.29161	.	0.0001	0.0001	0.0001	0.0001	1.65364	4.17053	5.15086e-05	-14.2448	0.0161984	0.488739	down	yes
293340	i	chr8.4	.	5681746	5682064	MSTRG.154369.1	1	319	MSTRG.154369	MS.gene57921	0.0001	0.0001	0.0001	2.51108	2.68842	3.18759	3.57693e-05	-14.7709	0.0162319	0.489481	down	yes
28778	i	chr1.2	.	67285246	67285660	MSTRG.15029.1	1	415	MSTRG.15029	MS.gene005674	3.22064	1.43879	1.92011	0.0001	0.0001	0.0001	21931.8	14.4207	0.0162335	0.489481	up	yes
221758	u	chr6.4	.	5583144	5583481	MSTRG.116844.1	1	338	MSTRG.116844	.	10.0211	0.0001	3.40267	0.0001	0.0001	0.0001	44746.3	15.4495	0.0162399	0.489517	up	yes
81828	u	chr2.4	.	52715687	52715992	MSTRG.42940.1	1	306	MSTRG.42940	.	0.0001	0.0001	0.0001	2.52563	2.88212	3.40644	3.4036e-05	-14.8426	0.01627	0.490077	down	yes
134394	i	chr4.1	.	74804675	74804880	MSTRG.70870.1	1	206	MSTRG.70870	MS.gene99077	0.0001	0.0001	0.0001	5.05354	2.18615	6.04798	2.25773e-05	-15.4348	0.0162742	0.490077	down	yes
277843	i	chr8.2	.	33631262	33631780	MSTRG.146276.1	1	519	MSTRG.146276	MS.gene056426	0.0001	0.0001	0.0001	1.93493	0.594549	2.93677	5.48822e-05	-14.1533	0.0163358	0.490983	down	yes
268404	u	chr8.1	+	38330803	38334188	MSTRG.141427.1	2	1265	MSTRG.141427	.	0.446552	0.174893	0.177749	0.676134	7.3929	2.78397	0.073638	-3.76341	0.0163535	0.491112	down	yes
265881	u	chr8.1	.	18436133	18436696	MSTRG.140062.1	1	564	MSTRG.140062	.	0.555602	2.10621	2.18006	0.0001	0.0001	0.0001	16139.6	13.9783	0.0163664	0.491112	up	yes
220596	x	chr6.3	-	78685661	78685916	MSTRG.116228.1	2	227	MSTRG.116228	MS.gene82573	0.0001	0.0001	0.0001	0.0001	12.0963	7.03127	1.56841e-05	-15.9603	0.0165626	0.495658	down	yes
297716	u	chr8.4	.	40472787	40473734	MSTRG.156617.1	1	948	MSTRG.156617	.	0.0001	0.0001	0.0001	1.28997	3.47013	0.0001	6.30226e-05	-13.9538	0.0165762	0.495658	down	yes
251488	i	chr7.3	.	63167427	63167856	MSTRG.132555.1	1	430	MSTRG.132555	MS.gene054926	1.8921	3.64359	0.930412	0.0001	0.0001	0.0001	21553.7	14.3956	0.0165848	0.495757	up	yes
145402	x	chr4.2	+	82441177	82445856	MSTRG.76705.1	2	487	MSTRG.76705	MS.gene92558	5.32174	4.00281	0.0001	0.0001	0.0001	0.0001	31082.2	14.9238	0.0166524	0.496935	up	yes
23938	u	chr1.2	.	22433812	22434025	MSTRG.12549.1	1	214	MSTRG.12549	.	0.0001	0.0001	0.0001	9.23895	4.90058	0.529263	2.04516e-05	-15.5774	0.0166554	0.496935	down	yes
220653	u	chr6.3	.	79232379	79233177	MSTRG.116259.1	1	799	MSTRG.116259	.	0.0001	0.0001	0.0001	0.0001	3.78542	1.63176	5.53784e-05	-14.1403	0.0169277	0.502478	down	yes
269973	u	chr8.1	.	56925266	56925892	MSTRG.142247.1	1	627	MSTRG.142247	.	0.0001	0.60723	0.0001	15.5351	22.5136	0.0001	0.0159645	-5.96899	0.0169484	0.502674	down	yes
256992	u	chr7.4	.	20270746	20271343	MSTRG.135341.1	1	598	MSTRG.135341	.	0.0001	4.99804	2.14586	0.0001	0.0001	0.0001	23813.3	14.5395	0.0169506	0.502674	up	yes
226272	u	chr7.1	.	2197164	2197376	MSTRG.119238.1	1	213	MSTRG.119238	.	0.0001	14.8854	5.46615	0.0001	0.0001	0.0001	67838.7	16.0498	0.017067	0.504527	up	yes
4924	u	39972	.	8799	9218	MSTRG.2266.1	1	420	MSTRG.2266	.	7.32348	7.55242	9.31546	8.16737	130.049	66.3379	0.118264	-3.07992	0.0170953	0.505196	down	yes
94484	i	chr3.1	.	86705106	86706049	MSTRG.49683.1	1	944	MSTRG.49683	MS.gene014740	1.84731	0.9056	0.359855	1.70837	21.6179	8.27666	0.0984962	-3.34379	0.0171178	0.50555	down	yes
24616	u	chr1.2	.	29974149	29974461	MSTRG.12901.1	1	313	MSTRG.12901	.	1.56495	3.02169	3.8346	0.0001	0.0001	0.0001	28070.8	14.7768	0.0172679	0.508695	up	yes
71184	u	chr2.3	+	26131270	26132261	MSTRG.37416.2	2	322	MSTRG.37416	.	2.37238	5.19333	1.03191	0.0001	0.0001	0.0001	28658.7	14.8067	0.0172779	0.508829	up	yes
218379	u	chr6.3	.	48196514	48196778	MSTRG.114961.1	1	265	MSTRG.114961	.	0.0001	10.5617	5.41788	0.0001	0.0001	0.0001	53265.5	15.7009	0.0172893	0.509006	up	yes
53264	u	chr2.1	.	12254033	12254459	MSTRG.28118.1	1	427	MSTRG.28118	.	0.0001	0.0001	0.0001	0.0001	7.52922	2.66093	2.94399e-05	-15.0519	0.0173605	0.510138	down	yes
122549	i	chr3.4	+	78810949	78812151	MSTRG.64517.1	2	835	MSTRG.64517	MS.gene045373	0.0001	0.0001	0.0001	1.3227	0.63178	1.17047	9.60014e-05	-13.3466	0.0174716	0.512116	down	yes
230901	o	chr7.1	+	36251965	36252995	MSTRG.121666.1	2	208	MSTRG.121666	MS.gene94781	16.3208	11.7605	3.46515	0.878784	0.017235	0.0001	35.2034	5.13764	0.0175396	0.513624	up	yes
4843	u	39840	+	13465	27322	MSTRG.2190.1	2	396	MSTRG.2190	.	4.22212	2.51467	4.76792	57.5234	2.8705	50.7999	0.103465	-3.27278	0.0175896	0.51458	down	yes
130233	u	chr4.1	.	28917066	28917410	MSTRG.68675.1	1	345	MSTRG.68675	.	0.0001	0.0001	0.0001	7.68385	5.22947	0.0001	2.32317e-05	-15.3935	0.0176693	0.516452	down	yes
26046	i	chr1.2	.	47411360	47411743	MSTRG.13602.1	1	384	MSTRG.13602	MS.gene029711	3.49665	0.832145	2.63299	0.0001	0.0001	0.0001	23206	14.5022	0.0176859	0.516614	up	yes
16170	u	chr1.1	+	48755345	48755618	MSTRG.8298.1	2	246	MSTRG.8298	.	8.84778	4.40356	0.259521	0.0001	0.0001	0.0001	45036.2	15.4588	0.0177383	0.517661	up	yes
299860	u	chr8.4	.	67358213	67358522	MSTRG.157696.1	1	310	MSTRG.157696	.	0.0001	0.0001	0.0001	1.78075	3.1162	3.53995	3.55581e-05	-14.7795	0.0177603	0.517818	down	yes
158815	j	chr4.4	+	12886509	12886995	MSTRG.83725.2	2	341	MSTRG.83725	MS.gene023650	0.0001	0.0001	0.0001	3.18204	5.17159	0.470805	3.39965e-05	-14.8443	0.0177861	0.518247	down	yes
217305	u	chr6.3	.	29928005	29928643	MSTRG.114393.1	1	639	MSTRG.114393	.	1.33844	1.59537	1.05904	0.0001	0.0001	0.0001	13309.5	13.7002	0.0178095	0.518513	up	yes
18840	u	chr1.1	.	67935283	67935551	MSTRG.9755.1	1	269	MSTRG.9755	.	0.0001	0.0001	0.0001	4.0432	3.48523	2.26163	3.06433e-05	-14.9941	0.0178119	0.518513	down	yes
249873	u	chr7.3	.	40057277	40057704	MSTRG.131726.1	1	428	MSTRG.131726	.	5.01309	0.0001	4.76882	0.0001	0.0001	0.0001	32606.7	14.9929	0.017908	0.520164	up	yes
203587	u	chr6.1	.	24869301	24869575	MSTRG.106919.1	1	275	MSTRG.106919	.	0.0001	0.0001	0.0001	3.30792	0.659599	6.28057	2.92737e-05	-15.06	0.0179131	0.520164	down	yes
75389	u	chr2.3	.	69164859	69165139	MSTRG.39608.1	1	281	MSTRG.39608	.	2.48448	3.08851	3.46853	0.0001	0.0001	0.0001	30138.4	14.8793	0.0179345	0.520301	up	yes
255370	u	chr7.4	.	8665907	8666758	MSTRG.134484.1	1	852	MSTRG.134484	.	2.1369	1.19609	0.174287	0.0001	0.0001	0.0001	11690.9	13.5131	0.0179778	0.521151	up	yes
150099	u	chr4.3	.	23551920	23552483	MSTRG.79174.1	1	564	MSTRG.79174	.	0.0001	0.0001	0.0001	0.608787	2.18454	1.95098	6.32337e-05	-13.9489	0.0180892	0.523029	down	yes
150471	i	chr4.3	.	25697308	25697525	MSTRG.79378.1	1	218	MSTRG.79378	MS.gene47528	0.879111	10.9276	11.0569	0.0001	0.033254	0.33977	61.2761	5.93725	0.0180901	0.523029	up	yes
213358	u	chr6.2	.	78533607	78534010	MSTRG.112242.1	1	404	MSTRG.112242	.	3.46645	0.990089	2.07891	0.0001	0.0001	0.0001	21784.8	14.411	0.0181019	0.523047	up	yes
289001	u	chr8.3	+	50307953	50309095	MSTRG.152165.1	1	1143	MSTRG.152165	.	0.0001	2.66314	1.0269	0.0001	0.0001	0.0001	12300.5	13.5864	0.0181298	0.523367	up	yes
106324	u	chr3.3	.	12288695	12289004	MSTRG.55877.1	1	310	MSTRG.55877	.	1.08283	4.97604	2.58114	0.0001	0.0001	0.0001	28800.1	14.8138	0.0181945	0.524589	up	yes
137982	u	chr4.2	+	12763833	12764196	MSTRG.72799.1	1	364	MSTRG.72799	.	4.65315	5.99208	7.82787	0.0001	0.0001	0.570361	32.3771	5.0169	0.0181945	0.524589	up	yes
56199	j	chr2.1	+	43421022	43423087	MSTRG.29577.4	2	1514	MSTRG.29577	MS.gene75886	0.0001	2.06313	2.0639	0.026383	0.0001	0.0001	155.254	7.27849	0.0182098	0.524867	up	yes
225775	u	chr6.4	.	63093840	63094594	MSTRG.118995.1	1	755	MSTRG.118995	.	0.0001	0.0001	0.0001	1.69742	1.10184	0.687534	8.6039e-05	-13.5047	0.0183133	0.527363	down	yes
240681	u	chr7.2	.	45283776	45284024	MSTRG.126770.1	1	249	MSTRG.126770	.	0.0001	0.0001	0.0001	4.46858	3.14834	2.61138	2.93304e-05	-15.0572	0.0183243	0.527495	down	yes
215606	u	chr6.3	.	10555552	10556130	MSTRG.113516.1	1	579	MSTRG.113516	.	0.0001	3.57945	3.44346	0.0001	0.0001	0.0001	23410	14.5148	0.0183292	0.527495	up	yes
222320	o	chr6.4	+	13638738	13714183	MSTRG.117168.2	2	242	MSTRG.117168	MS.gene85790	0.0001	12.7563	4.78376	0.0001	0.0001	0.0001	58467.3	15.8353	0.0183606	0.528107	up	yes
162088	u	chr4.4	.	35812763	35813908	MSTRG.85535.1	1	1146	MSTRG.85535	.	0.0001	0.175672	0.116369	0.982196	5.44239	1.00088	0.0393431	-4.66774	0.0184046	0.528998	down	yes
179176	u	chr5.2	.	26383421	26383680	MSTRG.94347.1	1	260	MSTRG.94347	.	0.0001	0.0001	0.0001	10.9172	6.04811	0.0001	1.76831e-05	-15.7873	0.0184097	0.528998	down	yes
287195	u	chr8.3	.	31671433	31671909	MSTRG.151201.1	1	477	MSTRG.151201	.	0.288229	1.8165	3.61073	0.0001	0.0001	0.0001	19051.5	14.2176	0.0184561	0.529953	up	yes
114159	u	chr3.3	+	87106980	87109008	MSTRG.60062.1	2	734	MSTRG.60062	.	0.0001	0.0001	0.0001	1.43078	2.2207	0.237758	7.71359e-05	-13.6622	0.0184809	0.530391	down	yes
161566	i	chr4.4	-	32507681	32508196	MSTRG.85234.1	1	516	MSTRG.85234	MS.gene96598	2.92963	1.36543	5.04497	0.053491	0.173745	0.155625	24.3953	4.60853	0.0184927	0.53057	up	yes
132453	u	chr4.1	.	48375459	48375690	MSTRG.69884.1	1	232	MSTRG.69884	.	0.0001	0.0001	0.0001	6.42113	4.18785	1.19182	2.5422e-05	-15.2636	0.0185138	0.53101	down	yes
133020	u	chr4.1	.	58268137	58269246	MSTRG.70186.1	1	1110	MSTRG.70186	.	0.485255	0.479795	1.44002	5.8099	9.19126	6.85226	0.110054	-3.18371	0.0185717	0.531906	down	yes
198321	u	chr5.4	-	51951249	51952957	MSTRG.104241.1	2	347	MSTRG.104241	.	4.24455	1.0446	2.38383	0.0001	0.0001	0.0001	25576.6	14.6425	0.0186146	0.532433	up	yes
92358	x	chr3.1	-	72905071	72905357	MSTRG.48485.1	2	260	MSTRG.48485	MS.gene84134	0.0001	0.0001	0.0001	0.0001	4.59748	11.5046	1.8631e-05	-15.7119	0.0186302	0.532451	down	yes
261519	x	chr7.4	-	72649794	72700813	MSTRG.137771.1	2	774	MSTRG.137771	MS.gene040452	0.0001	0.089467	0.095136	2.21435	3.71329	1.11352	0.0262319	-5.25254	0.0187161	0.533965	down	yes
243600	u	chr7.2	+	83569615	83570286	MSTRG.128382.2	2	353	MSTRG.128382	.	0.0001	0.0001	0.0001	2.50403	4.05515	0.920613	4.01081e-05	-14.6057	0.01872	0.533965	down	yes
218027	u	chr6.3	.	42186898	42187197	MSTRG.114753.1	1	300	MSTRG.114753	.	2.69317	3.19418	2.37398	0.0001	0.0001	0.0001	27537.7	14.7491	0.0187318	0.533965	up	yes
209783	u	chr6.2	-	22386190	22450242	MSTRG.110357.1	3	404	MSTRG.110357	.	48.2252	18.2698	13.9498	30.5198	55.8197	666.865	0.106804	-3.22697	0.0187761	0.534924	down	yes
106845	u	chr3.3	.	19472010	19472404	MSTRG.56202.1	1	395	MSTRG.56202	.	0.0001	0.0001	0.0001	2.49576	8.58801	0.0001	2.70663e-05	-15.1731	0.0188316	0.536252	down	yes
33659	i	chr1.3	-	14343771	14346750	MSTRG.17704.1	2	488	MSTRG.17704	MS.gene054108	0.055473	0.436535	0.0001	7.30795	7.34022	0.466921	0.0325574	-4.94087	0.0188439	0.536366	down	yes
190176	u	chr5.3	.	56293596	56294230	MSTRG.100006.1	1	635	MSTRG.100006	.	0.643913	1.8949	1.40754	0.0001	0.0001	0.0001	13154.5	13.6833	0.0188729	0.536386	up	yes
156713	u	chr4.3	.	89435786	89436194	MSTRG.82582.1	1	409	MSTRG.82582	.	0.0001	2.53579	7.21848	0.0001	0.0001	0.0001	32514.6	14.9888	0.0188814	0.536454	up	yes
191384	j	chr5.3	+	67994147	67995056	MSTRG.100619.2	2	514	MSTRG.100619	MS.gene29728	0.0001	6.53202	1.72831	0.0001	0.0001	0.0001	27534.8	14.749	0.0189027	0.536895	up	yes
269352	u	chr8.1	.	48067599	48068140	MSTRG.141908.1	1	542	MSTRG.141908	.	0.0001	5.78832	1.97931	0.0001	0.0001	0.0001	25892.4	14.6602	0.0189719	0.538068	up	yes
34478	u	chr1.3	.	21750476	21750727	MSTRG.18141.1	1	252	MSTRG.18141	.	0.0001	0.0001	0.0001	0.0001	12.984	4.02367	1.7639e-05	-15.7909	0.0189853	0.538098	down	yes
121882	u	chr3.4	+	74258030	74258521	MSTRG.64122.2	2	454	MSTRG.64122	.	0.0001	0.0001	0.0001	2.00758	7.58486	0.0001	3.12743e-05	-14.9647	0.0190289	0.538516	down	yes
211299	j	chr6.2	+	44250382	44251095	MSTRG.111131.2	3	516	MSTRG.111131	MS.gene95830	0.0001	0.0001	0.0001	0.325328	1.74127	3.28344	5.60744e-05	-14.1223	0.0190758	0.539192	down	yes
239014	u	chr7.2	.	28445725	28446132	MSTRG.125929.1	1	408	MSTRG.125929	.	0.0001	5.7874	4.23412	0.0001	0.0001	0.0001	33405.4	15.0278	0.0191522	0.54037	up	yes
43813	u	chr1.4	-	18713027	18716229	MSTRG.23189.1	3	1784	MSTRG.23189	.	0.044636	0.18431	0.473343	5.15433	2.24556	1.60839	0.0779604	-3.68111	0.0191896	0.540937	down	yes
241465	i	chr7.2	-	55174615	55175248	MSTRG.127240.1	2	497	MSTRG.127240	MS.gene010820	0.235524	3.35878	2.10412	0.0001	0.0001	0.0001	18994.8	14.2133	0.0193007	0.543042	up	yes
32272	u	chr1.3	.	3882744	3883501	MSTRG.16900.1	1	758	MSTRG.16900	.	4.30023	0.767381	1.54224	0.0001	0.129277	0.0001	51.0504	5.67385	0.0193437	0.543738	up	yes
152759	j	chr4.3	+	43200278	43201822	MSTRG.80582.1	2	408	MSTRG.80582	MS.gene08664	5.8197	3.10498	5.23952	0.0001	0.0001	0.367079	38.5652	5.26923	0.019402	0.544626	up	yes
145218	j	chr4.2	-	80699646	80700047	MSTRG.76599.2	2	227	MSTRG.76599	MS.gene78811	6.58196	12.6991	0.0001	0.0001	0.0001	0.0001	64270.5	15.9719	0.0194567	0.545616	up	yes
218210	u	chr6.3	.	45000750	45001567	MSTRG.114860.1	1	818	MSTRG.114860	.	0.0001	0.0001	0.0001	2.26962	0.958358	0.209232	8.72801e-05	-13.484	0.0194665	0.545616	down	yes
246190	u	chr7.3	.	11131000	11131469	MSTRG.129717.1	1	470	MSTRG.129717	.	0.0001	0.0001	0.0001	0.0001	5.52509	3.34393	3.38252e-05	-14.8515	0.0196194	0.548916	down	yes
6225	u	41869	.	12447	13306	MSTRG.3404.1	1	860	MSTRG.3404	.	0.0001	3.17673	11.4641	0.256759	0.0001	0.0001	56.9776	5.83232	0.0196694	0.549491	up	yes
146221	u	chr4.2	.	90254246	90254628	MSTRG.77108.1	1	383	MSTRG.77108	.	2.04115	2.04265	2.30328	0.0001	0.0001	0.0001	21290.3	14.3779	0.0197092	0.549783	up	yes
144689	u	chr4.2	.	74964271	74965462	MSTRG.76309.1	1	1192	MSTRG.76309	.	0.263385	1.25101	0.705588	1.79268	11.9998	7.19019	0.105801	-3.24058	0.0197705	0.550999	down	yes
12811	u	chr1.1	+	12569083	12570312	MSTRG.6596.1	2	218	MSTRG.6596	.	4.16076	1.9544	5.05877	0.0001	0.0001	0.0001	37246.4	15.1848	0.0197906	0.551394	up	yes
219186	u	chr6.3	.	63116167	63116487	MSTRG.115401.1	1	321	MSTRG.115401	.	0.0001	0.0001	0.0001	3.21015	1.22109	3.30439	3.87816e-05	-14.6543	0.019857	0.552257	down	yes
221388	i	chr6.4	.	964388	964683	MSTRG.116642.1	1	296	MSTRG.116642	MS.gene74407	0.0001	0.0001	0.0001	0.0001	4.63476	9.14333	2.17735e-05	-15.4871	0.0199804	0.55412	down	yes
124997	o	chr3.4	-	95115570	95134140	MSTRG.65783.1	2	237	MSTRG.65783	MS.gene031221	0.0001	0.0001	0.0001	0.0001	4.07699	13.2002	1.73638e-05	-15.8136	0.0199979	0.55412	down	yes
205349	j	chr6.1	+	59136632	59137297	MSTRG.107838.2	3	384	MSTRG.107838	MS.gene046857	3.38022	0.744695	2.43128	0.0001	0.0001	0.0001	21854	14.4156	0.020009	0.554178	up	yes
48230	u	chr1.4	.	65768933	65769143	MSTRG.25445.1	1	211	MSTRG.25445	.	0.0001	0.0001	0.0001	3.13952	4.34774	4.03357	2.60398e-05	-15.2289	0.0200519	0.554873	down	yes
185247	u	chr5.3	.	4458605	4458834	MSTRG.97457.1	1	230	MSTRG.97457	.	1.6846	5.41605	3.82641	0.0001	0.0001	0.0001	36423.6	15.1526	0.0201027	0.555947	up	yes
221135	u	chr6.3	-	83337253	83337641	MSTRG.116508.1	1	389	MSTRG.116508	.	0.0001	1.12698	0.591435	35.804	5.006	0.672908	0.0414271	-4.59328	0.0201204	0.556262	down	yes
265519	i	chr8.1	.	15565752	15566130	MSTRG.139898.1	1	379	MSTRG.139898	MS.gene044496	2.40049	2.58119	1.43269	0.0001	0.0001	0.0001	21381.2	14.3841	0.0201401	0.556365	up	yes
145042	u	chr4.2	.	79188673	79188977	MSTRG.76495.1	1	305	MSTRG.76495	.	3.53982	2.80621	1.64819	0.0001	0.0001	0.0001	26647.4	14.7017	0.0201417	0.556365	up	yes
111267	u	chr3.3	.	68140421	68140696	MSTRG.58572.1	1	276	MSTRG.58572	.	19.0895	0.0001	10.5515	0.0001	0.309719	0.0001	95.6413	6.57956	0.0202119	0.556849	up	yes
96992	x	chr3.2	+	18346955	18380044	MSTRG.51115.1	2	529	MSTRG.51115	MS.gene83747	3.29992	18.1209	46.5121	2.99446	2.10906	3.23082	8.15096	3.02697	0.0202273	0.556897	up	yes
2318	u	23291	.	88665	89036	MSTRG.1030.1	1	372	MSTRG.1030	.	0.0001	0.0001	0.0001	2.63323	1.58052	2.18057	4.69166e-05	-14.3795	0.0205305	0.562641	down	yes
120910	i	chr3.4	.	66487464	66488439	MSTRG.63592.1	1	976	MSTRG.63592	MS.gene05012	0.0001	0.0001	0.0001	1.46656	1.17563	0.165045	0.000106867	-13.1919	0.0205563	0.562832	down	yes
34692	u	chr1.3	+	24084976	24085491	MSTRG.18284.1	1	516	MSTRG.18284	.	0.0001	0.0001	0.0001	2.22957	0.592618	2.06458	6.13903e-05	-13.9916	0.0206488	0.563915	down	yes
116221	u	chr3.4	.	7815526	7816121	MSTRG.61123.1	1	596	MSTRG.61123	.	0.0001	0.0001	0.0001	5.65743	1.69061	0.0001	4.08266e-05	-14.5801	0.0206841	0.563915	down	yes
244826	i	chr7.3	.	2029567	2030023	MSTRG.129018.1	1	457	MSTRG.129018	MS.gene024548	2.85054	2.21873	0.599667	0.0001	0.0001	0.0001	18896.5	14.2058	0.0207708	0.56556	up	yes
228884	u	chr7.1	.	19060735	19061019	MSTRG.120595.1	1	285	MSTRG.120595	.	2.78166	5.37675	0.896029	0.0001	0.0001	0.0001	30181.5	14.8814	0.0208517	0.567101	up	yes
109904	u	chr3.3	.	57722540	57722963	MSTRG.57833.1	1	424	MSTRG.57833	.	0.775692	5.87679	3.24676	0.108405	0.0001	0.0001	91.149	6.51016	0.0210578	0.571378	up	yes
279386	u	chr8.2	.	51223597	51223858	MSTRG.147061.1	1	262	MSTRG.147061	.	0.0001	0.0001	0.0001	0.0001	10.5945	5.13955	1.90669e-05	-15.6786	0.0211165	0.572471	down	yes
210262	u	chr6.2	+	28239277	28239761	MSTRG.110601.1	1	485	MSTRG.110601	.	0.0001	0.0001	0.054603	0.0001	7.41851	2.94248	0.00528931	-7.56271	0.0212228	0.574521	down	yes
96233	u	chr3.2	.	8643692	8644507	MSTRG.50613.1	1	816	MSTRG.50613	.	0.0001	0.617484	0.0001	0.0001	24.1148	7.69049	0.0194207	-5.68626	0.0212857	0.575723	down	yes
258383	i	chr7.4	.	30427947	30428290	MSTRG.136126.1	1	344	MSTRG.136126	MS.gene92811	13.0021	16.9295	6.24399	0.641897	0.375774	1.9755	12.086	3.59527	0.0213688	0.576862	up	yes
204983	u	chr6.1	+	51822829	51873071	MSTRG.107636.3	2	235	MSTRG.107636	.	0.276756	5.94533	5.36512	0.0001	0.0001	0.0001	38624	15.2372	0.021371	0.576862	up	yes
257090	i	chr7.4	-	20923188	20923476	MSTRG.135401.2	1	289	MSTRG.135401	MS.gene41806	0.0001	0.0001	0.0001	4.96231	1.00159	2.76144	3.43826e-05	-14.828	0.0214619	0.578315	down	yes
204043	u	chr6.1	.	33114978	33115597	MSTRG.107182.1	1	620	MSTRG.107182	.	0.0001	0.0001	0.0001	1.76875	0.720761	1.38895	7.73502e-05	-13.6582	0.0215031	0.579258	down	yes
266568	i	chr8.1	.	23326846	23327574	MSTRG.140446.1	1	729	MSTRG.140446	MS.gene011616	0.0001	0.0001	0.0001	2.58717	0.0001	2.84752	5.52e-05	-14.145	0.0215415	0.579793	down	yes
65912	i	chr2.2	.	59058728	59058975	MSTRG.34610.1	1	248	MSTRG.34610	MS.gene02017	1.21015	5.11433	3.56013	0.0001	0.0001	0.0001	32948.7	15.0079	0.021592	0.580558	up	yes
27218	i	chr1.2	.	56928219	56928468	MSTRG.14200.1	1	250	MSTRG.14200	MS.gene32142	0.0001	0.0001	0.0001	1.69211	4.68694	3.13538	3.1531e-05	-14.9529	0.0216103	0.580808	down	yes
51755	u	chr2.1	.	531561	531979	MSTRG.27330.1	1	419	MSTRG.27330	.	0.0001	0.0001	0.0001	2.51514	0.643561	2.67132	5.14578e-05	-14.2463	0.0216509	0.581062	down	yes
296669	u	chr8.4	.	31265978	31266428	MSTRG.156103.1	1	451	MSTRG.156103	.	3.03196	0.236174	2.68433	0.0001	0.0001	0.0001	19841.6	14.2762	0.0216831	0.581401	up	yes
183438	u	chr5.2	.	75233276	75233484	MSTRG.96523.1	1	209	MSTRG.96523	.	5.8891	5.67832	0.882453	0.0001	0.0001	0.0001	41499.6	15.3408	0.0217072	0.581738	up	yes
106123	o	chr3.3	+	10472186	10478632	MSTRG.55803.1	2	438	MSTRG.55803	MS.gene039687	2.01381	3.972	0.304473	0.0001	0.0001	0.0001	20967.6	14.3559	0.0217367	0.581904	up	yes
120706	u	chr3.4	.	64802322	64802539	MSTRG.63397.1	1	218	MSTRG.63397	.	8.33244	3.86721	0.514121	0.0001	0.0001	0.0001	42379.2	15.3711	0.021847	0.583645	up	yes
11348	u	chr1.1	.	1709913	1710145	MSTRG.5821.1	1	233	MSTRG.5821	.	0.0001	0.0001	0.0001	4.32595	3.68071	2.17589	2.94622e-05	-15.0508	0.0218584	0.583741	down	yes
227326	u	chr7.1	.	8556187	8556451	MSTRG.119779.1	1	265	MSTRG.119779	.	0.0001	0.0001	0.0001	0.143308	3.03955	7.71872	2.75189e-05	-15.1492	0.0218755	0.583741	down	yes
228585	u	chr7.1	.	17397718	17398203	MSTRG.120430.1	1	486	MSTRG.120430	.	0.0001	0.0001	0.0001	0.0001	2.77077	5.5414	3.60912e-05	-14.758	0.0219061	0.584056	down	yes
64484	u	chr2.2	.	45401403	45401772	MSTRG.33878.1	1	370	MSTRG.33878	.	0.0001	0.0001	0.0001	4.17013	7.2184	0.0001	2.63421e-05	-15.2123	0.0219565	0.584733	down	yes
208670	u	chr6.2	.	10377582	10377853	MSTRG.109718.1	1	272	MSTRG.109718	.	0.0001	0.0001	0.0001	3.4502	4.32318	1.18973	3.34705e-05	-14.8667	0.0219707	0.584737	down	yes
241792	u	chr7.2	+	62027014	62033310	MSTRG.127414.1	2	251	MSTRG.127414	.	0.618887	0.664631	0.0001	11.3865	7.80518	7.39882	0.0482736	-4.37262	0.0219754	0.584737	down	yes
187248	u	chr5.3	+	20315613	20320448	MSTRG.98518.4	2	1309	MSTRG.98518	.	0.0001	0.0001	0.0001	2.1302	1.15084	0.0001	9.14319e-05	-13.4169	0.0221277	0.587286	down	yes
240704	u	chr7.2	+	45577243	45582587	MSTRG.126789.1	2	256	MSTRG.126789	.	5.38001	0.702307	3.81852	0.0001	0.0001	0.0001	33002.8	15.0103	0.0222361	0.588824	up	yes
232906	i	chr7.1	.	64709458	64709885	MSTRG.122726.1	1	428	MSTRG.122726	MS.gene040216	0.0001	0.0001	0.0001	0.257959	1.83163	4.08288	4.86029e-05	-14.3286	0.0222514	0.589064	down	yes
203861	i	chr6.1	-	29517485	29517941	MSTRG.107087.2	1	457	MSTRG.107087	MS.gene94863	0.0001	0.0001	0.071401	2.57924	3.79877	1.02125	0.00967678	-6.69126	0.0222699	0.589167	down	yes
210264	u	chr6.2	+	28245058	28246124	MSTRG.110603.1	1	1067	MSTRG.110603	.	0.091852	0.055695	0.049122	0.081336	3.29092	2.37419	0.0342245	-4.86883	0.0222834	0.589167	down	yes
68296	i	chr2.3	.	2301874	2302296	MSTRG.35895.1	1	423	MSTRG.35895	MS.gene76493	0.0001	4.22983	4.9068	0.0001	0.0001	0.0001	30455.8	14.8944	0.0223049	0.589311	up	yes
225118	i	chr6.4	+	56470645	56471457	MSTRG.118631.1	1	813	MSTRG.118631	MS.gene78291	0.0001	0.0001	0.0001	4.18576	0.0001	0.976081	5.81177e-05	-14.0707	0.0223332	0.589725	down	yes
197397	u	chr5.4	.	39148007	39148228	MSTRG.103745.1	1	222	MSTRG.103745	.	0.756032	5.77456	4.78017	0.0001	0.0001	0.0001	37702.5	15.2024	0.022486	0.592256	up	yes
94880	u	chr3.1	.	89354585	89355512	MSTRG.49897.1	1	928	MSTRG.49897	.	0.0001	0.0001	0.0001	3.12281	0.0001	1.21352	6.91812e-05	-13.8193	0.0226169	0.594364	down	yes
167929	i	chr5.1	+	5424669	5426372	MSTRG.88497.1	2	1637	MSTRG.88497	MS.gene21145	6.18783	0.739502	0.63988	6.82498	26.1218	25.4828	0.12951	-2.94887	0.0226335	0.594634	down	yes
28145	u	chr1.2	.	63119371	63119787	MSTRG.14664.1	1	417	MSTRG.14664	.	1.98867	1.16967	2.21728	0.0001	0.0001	0.0001	17918.7	14.1292	0.0227349	0.595958	up	yes
98416	u	chr3.2	.	41537834	41538337	MSTRG.51759.1	1	504	MSTRG.51759	.	0.0001	0.0001	0.0001	2.07136	0.90044	1.60876	6.54942e-05	-13.8983	0.0227438	0.596023	down	yes
165690	u	chr4.4	+	78078730	78085550	MSTRG.87338.1	2	1088	MSTRG.87338	.	0.0001	0.943583	0.523237	0.0001	7.20585	39.295	0.0315461	-4.9864	0.0227553	0.596081	down	yes
217763	u	chr6.3	-	37365318	37366637	MSTRG.114584.2	4	730	MSTRG.114584	.	0.0001	0.0001	0.019546	1.41021	5.57961	0.0001	0.00282493	-8.46757	0.0227807	0.59649	down	yes
120483	u	chr3.4	.	62293818	62294314	MSTRG.63439.1	1	497	MSTRG.63439	.	4.62117	3.83391	0.0001	0.0001	0.0001	0.0001	28183.9	14.7826	0.0227993	0.596641	up	yes
25590	u	chr1.2	.	42427324	42427540	MSTRG.13385.1	1	217	MSTRG.13385	.	0.0001	0.0001	0.0001	0.0001	6.3525	11.931	1.64081e-05	-15.8952	0.0228266	0.596858	down	yes
53043	i	chr2.1	.	10110978	10111888	MSTRG.28014.1	1	911	MSTRG.28014	MS.gene055768	2.63538	2.00175	0.0001	0.0001	0.0001	0.0001	15457.4	13.916	0.0228267	0.596858	up	yes
180062	u	chr5.2	-	35764322	35765445	MSTRG.94785.1	2	1025	MSTRG.94785	.	0.0001	0.0001	0.0001	0.566833	0.811663	0.866452	0.000133633	-12.8694	0.0228492	0.597124	down	yes
102619	i	chr3.2	.	77167618	77168319	MSTRG.53934.1	1	702	MSTRG.53934	MS.gene06901	1.42859	2.65779	2.26347	0.157274	0.0001	0.0001	40.3232	5.33354	0.0228831	0.597524	up	yes
279521	u	chr8.2	.	53897553	53897792	MSTRG.147122.1	1	240	MSTRG.147122	.	0.0001	0.0001	0.0001	1.42412	3.57335	4.63236	3.11532e-05	-14.9703	0.0228841	0.597524	down	yes
148017	i	chr4.3	.	8871313	8871570	MSTRG.78080.1	1	258	MSTRG.78080	MS.gene030676	1.18573	4.12701	3.82631	0.0001	0.0001	0.0001	30463.5	14.8948	0.02294	0.598315	up	yes
233163	u	chr7.1	.	67913059	67913274	MSTRG.122856.1	1	216	MSTRG.122856	.	0.0001	8.27117	9.21069	0.0001	0.0001	0.0001	58273.2	15.8305	0.0230673	0.600296	up	yes
292975	u	chr8.4	.	2543127	2544042	MSTRG.154173.1	1	916	MSTRG.154173	.	2.34431	0.0001	1.99666	0.0001	0.0001	0.0001	14470.2	13.8208	0.0232253	0.603065	up	yes
172544	u	chr5.1	.	53173284	53173635	MSTRG.90848.1	1	352	MSTRG.90848	.	12.6525	6.66664	6.23777	1.24572	0.0001	0.28193	16.7285	4.06424	0.0232616	0.603671	up	yes
145033	u	chr4.2	.	79079491	79079754	MSTRG.76491.1	1	264	MSTRG.76491	.	0.0001	7.67106	6.84547	0.0001	0.0001	0.0001	48388.8	15.5624	0.0232763	0.603886	up	yes
79358	i	chr2.4	.	23333331	23333725	MSTRG.41739.1	1	395	MSTRG.41739	MS.gene96017	2.57809	5.92194	7.1205	0.558028	0.0001	0.0001	27.9823	4.80644	0.0234253	0.606298	up	yes
214748	j	chr6.3	-	3160883	3162464	MSTRG.113077.2	6	696	MSTRG.113077	MS.gene026944	0.0001	3.94155	6.2185	0.0001	0.116329	0.0001	87.1899	6.44609	0.0235285	0.607229	up	yes
250507	u	chr7.3	.	48770079	48770505	MSTRG.132048.1	1	427	MSTRG.132048	.	0.0001	0.0001	0.0001	0.0001	5.2436	4.05969	3.22463e-05	-14.9205	0.0236376	0.608868	down	yes
128651	u	chr4.1	.	18614830	18615298	MSTRG.67771.1	1	469	MSTRG.67771	.	3.30413	2.04399	0.262164	0.0001	0.0001	0.0001	18700.9	14.1908	0.0236542	0.608958	up	yes
12909	u	chr1.1	.	13609100	13609477	MSTRG.6642.1	1	378	MSTRG.6642	.	0.0001	0.0001	0.0001	0.0001	5.49181	4.95207	2.87247e-05	-15.0873	0.0236709	0.608958	down	yes
10587	i	6950	.	23433	23770	MSTRG.5460.1	1	338	MSTRG.5460	MS.gene018887	0.0001	0.0001	0.0001	2.92244	4.63868	0.276587	3.82765e-05	-14.6732	0.0236983	0.608993	down	yes
33739	u	chr1.3	.	15157868	15158102	MSTRG.17738.1	1	235	MSTRG.17738	.	0.0001	0.0001	0.0001	8.86455	0.0001	7.24582	1.86214e-05	-15.7127	0.0237299	0.609229	down	yes
118773	o	chr3.4	-	44255957	44585429	MSTRG.62467.1	4	391	MSTRG.62467	MS.gene65973	0.0001	5.4628	4.21362	0.0001	0.0001	0.0001	32255.1	14.9772	0.0237474	0.609315	up	yes
106631	u	chr3.3	.	15415896	15416116	MSTRG.56074.1	1	221	MSTRG.56074	.	0.0001	24.9734	24.8927	0.988523	0.0001	0.0001	50.435	5.65635	0.0239087	0.612477	up	yes
206002	u	chr6.1	.	66340811	66341212	MSTRG.108312.1	1	402	MSTRG.108312	.	0.0001	6.24821	3.31151	0.0001	0.0001	0.0001	31866	14.9597	0.023936	0.612651	up	yes
263696	u	chr8.1	.	2534033	2534702	MSTRG.138866.1	1	670	MSTRG.138866	.	2.32731	0.0001	3.48608	0.0001	0.0001	0.0001	19378.3	14.2422	0.0239922	0.613773	up	yes
261190	u	chr7.4	.	68680326	68680679	MSTRG.137589.1	1	354	MSTRG.137589	.	0.0001	7.99702	3.08657	0.0001	0.0001	0.0001	36945.6	15.1731	0.0240262	0.613993	up	yes
133203	u	chr4.1	.	60712866	60713716	MSTRG.70286.1	1	851	MSTRG.70286	.	0.0001	0.0001	0.0001	2.79073	2.07269	0.0001	6.16837e-05	-13.9848	0.024027	0.613993	down	yes
207600	u	chr6.2	.	470845	471250	MSTRG.109172.1	1	406	MSTRG.109172	.	0.0001	4.44229	4.8001	0.0001	0.0001	0.0001	30808.3	14.911	0.0240554	0.614381	up	yes
269411	u	chr8.1	+	48963625	48966274	MSTRG.141959.1	3	1763	MSTRG.141959	.	0.211408	0.713281	1.00538	4.73233	4.37377	5.90768	0.128553	-2.95956	0.0240647	0.614452	down	yes
224054	u	chr6.4	.	45150185	45150511	MSTRG.117981.1	1	327	MSTRG.117981	.	5.27982	0.0001	2.11665	12.8747	32.7355	42.8768	0.0835894	-3.58054	0.0240819	0.614616	down	yes
134210	u	chr4.1	.	72909444	72909696	MSTRG.70758.1	1	253	MSTRG.70758	.	0.0001	4.06375	10.5833	0.0001	0.0001	0.0001	48824	15.5753	0.0242138	0.616066	up	yes
1888	x	20956	+	16851	74879	MSTRG.804.1	2	213	MSTRG.804	MS.gene22053	0.0001	0.0001	0.0001	0.0001	3.82387	14.7559	1.61465e-05	-15.9184	0.0242247	0.616066	down	yes
295268	u	chr8.4	.	20190810	20191079	MSTRG.155356.1	1	270	MSTRG.155356	.	0.0001	0.0001	0.0001	0.0001	9.34576	5.20211	2.06214e-05	-15.5655	0.0242422	0.616066	down	yes
96483	u	chr3.2	.	11011929	11012591	MSTRG.50748.1	1	663	MSTRG.50748	.	0.0001	0.0001	0.0001	0.0001	2.20339	3.61741	5.15385e-05	-14.244	0.0242643	0.616066	down	yes
300098	o	chr8.4	+	69153197	69205848	MSTRG.157824.2	2	320	MSTRG.157824	MS.gene066953	0.0001	0.0001	0.0001	0.034502	6.36189	2.86762	3.23834e-05	-14.9144	0.0243586	0.617236	down	yes
200341	u	chr5.4	.	69762094	69762910	MSTRG.105292.1	1	817	MSTRG.105292	.	0.0001	3.23162	1.43651	0.0001	0.0001	0.0001	15560.8	13.9256	0.0243881	0.617315	up	yes
33340	i	chr1.3	.	11627316	11627746	MSTRG.17506.1	1	431	MSTRG.17506	MS.gene55703	0.0001	0.0001	0.0001	0.0001	3.63776	5.29082	3.35996e-05	-14.8612	0.0244062	0.61744	down	yes
111945	i	chr3.3	.	72480080	72480406	MSTRG.58908.1	1	327	MSTRG.58908	MS.gene75502	0.0001	0.0001	0.0001	0.0001	8.04327	3.96178	2.49893e-05	-15.2883	0.0244531	0.617789	down	yes
247229	i	chr7.3	.	18729403	18729915	MSTRG.130248.1	1	513	MSTRG.130248	MS.gene017789	3.19747	4.71329	0.0001	0.0001	0.0001	0.0001	26369.5	14.6866	0.0244782	0.617789	up	yes
228885	u	chr7.1	.	19061334	19062546	MSTRG.120596.1	1	1213	MSTRG.120596	.	0.700765	2.71506	0.0001	0.0001	0.0001	0.0001	11386.4	13.475	0.0244965	0.617883	up	yes
26515	u	chr1.2	.	50855557	50855781	MSTRG.13807.1	1	225	MSTRG.13807	.	0.0001	5.18052	11.0996	0.0001	0.0001	0.0001	54267.4	15.7278	0.0245529	0.618806	up	yes
259570	u	chr7.4	.	42884463	42884840	MSTRG.136758.1	1	378	MSTRG.136758	.	0.0001	0.0001	0.0001	0.0001	7.69626	2.89552	2.83236e-05	-15.1076	0.0245628	0.618888	down	yes
249197	j	chr7.3	+	33119818	33121269	MSTRG.131336.2	3	375	MSTRG.131336	MS.gene42119	0.0001	0.0001	0.0001	0.0001	2.87444	7.54889	2.87813e-05	-15.0845	0.0246128	0.619265	down	yes
124661	u	chr3.4	.	92933962	92934748	MSTRG.65614.1	1	787	MSTRG.65614	.	0.0001	1.28143	3.38244	0.0001	0.0001	0.0001	15546.6	13.9243	0.0246272	0.619343	up	yes
206178	u	chr6.1	-	67798231	67808656	MSTRG.108357.1	2	966	MSTRG.108357	.	5.50999	1.02451	0.0001	0.0001	0.0001	0.046863	138.848	7.11736	0.0246495	0.619459	up	yes
222279	x	chr6.4	+	13290626	13315459	MSTRG.117162.1	2	279	MSTRG.117162	MS.gene69302	10.1307	19.2006	1.91227	0.023089	0.95473	0.762074	17.9572	4.16649	0.0246951	0.619748	up	yes
88125	j	chr3.1	-	38229819	38230825	MSTRG.46281.3	4	643	MSTRG.46281	MS.gene82713	4.57678	1.87684	0.0001	0.0001	0.0001	0.0001	21512.4	14.3929	0.0246963	0.619748	up	yes
269810	u	chr8.1	+	54102888	54105247	MSTRG.142216.2	2	1864	MSTRG.142216	.	0.0001	0.019024	0.0001	1.25969	0.0001	1.68267	0.00653331	-7.25797	0.0247588	0.62071	down	yes
3015	u	30687	-	21819	25690	MSTRG.1345.2	2	333	MSTRG.1345	.	2.62753	3.91409	0.551485	0.0001	0.0001	0.0001	23643.7	14.5292	0.0248236	0.62116	up	yes
232589	u	chr7.1	.	61144459	61144849	MSTRG.122537.1	1	391	MSTRG.122537	.	0.0001	5.22145	4.17329	0.0001	0.0001	0.0001	31316.1	14.9346	0.0248323	0.62116	up	yes
269458	u	chr8.1	.	49158709	49159531	MSTRG.141977.1	1	823	MSTRG.141977	.	0.0001	0.0001	0.0001	0.0001	3.94247	0.976716	6.09845e-05	-14.0012	0.0248568	0.621443	down	yes
184057	u	chr5.2	+	79944026	79944419	MSTRG.96839.1	1	394	MSTRG.96839	.	0.0001	0.029718	0.237652	4.89625	6.22174	0.804095	0.0224348	-5.47812	0.0248835	0.621942	down	yes
111388	i	chr3.3	.	69018205	69018446	MSTRG.58640.1	1	242	MSTRG.58640	MS.gene044298	0.0001	0.0001	0.0001	0.0001	4.73946	10.9508	1.912e-05	-15.6746	0.0251026	0.625252	down	yes
33655	j	chr1.3	+	14333419	14338298	MSTRG.17701.2	3	1524	MSTRG.17701	MS.gene054108	0.714678	0.0001	0.0001	7.9675	5.71146	1.31722	0.0476707	-4.39075	0.0252615	0.627864	down	yes
155999	u	chr4.3	.	83584811	83585367	MSTRG.82216.1	1	557	MSTRG.82216	.	0.0001	3.52244	3.01255	0.0001	0.0001	0.0001	21783.7	14.411	0.0252976	0.628428	up	yes
144414	u	chr4.2	-	72439164	72440124	MSTRG.76185.1	2	930	MSTRG.76185	.	0.0001	0.304927	0.0001	0.0001	10.4768	5.89685	0.0186352	-5.74583	0.025308	0.628447	down	yes
23285	i	chr1.2	+	16162150	16162376	MSTRG.12242.2	1	227	MSTRG.12242	MS.gene83135	0.0001	0.0001	0.0001	3.74193	4.83118	1.24461	3.0557e-05	-14.9981	0.0254221	0.630618	down	yes
13898	u	chr1.1	.	23051362	23051568	MSTRG.7175.1	1	207	MSTRG.7175	.	0.0001	0.0001	0.0001	2.12589	4.44854	3.80754	2.88962e-05	-15.0788	0.0254284	0.630618	down	yes
153292	i	chr4.3	.	49691367	49691857	MSTRG.80850.1	1	491	MSTRG.80850	MS.gene66611	0.169746	2.5782	2.32503	0.0001	0.0001	0.0001	16909.9	14.0456	0.0255035	0.631905	up	yes
90565	i	chr3.1	.	60101182	60102041	MSTRG.47550.1	1	860	MSTRG.47550	MS.gene30753	0.0001	0.0001	0.0001	2.06985	0.0001	2.12351	7.15399e-05	-13.7709	0.0258822	0.63837	down	yes
44326	u	chr1.4	-	23721107	23762763	MSTRG.23459.1	2	309	MSTRG.23459	.	0.0001	7.58723	4.25614	0.0001	0.0001	0.0001	39478.2	15.2688	0.0258926	0.638421	up	yes
247479	u	chr7.3	.	20698962	20699170	MSTRG.130391.1	1	209	MSTRG.130391	.	0.0001	10.0988	7.14108	0.0001	0.0001	0.0001	57466.6	15.8104	0.0259329	0.638609	up	yes
281233	i	chr8.2	.	70762545	70762812	MSTRG.147998.1	1	268	MSTRG.147998	MS.gene067295	1.19035	3.68127	2.92918	0.0001	0.0001	0.0001	26002.7	14.6664	0.0260814	0.640991	up	yes
83363	u	chr2.4	+	65993718	65994423	MSTRG.43704.1	2	653	MSTRG.43704	.	5.15509	4.03821	3.77382	0.0001	0.507455	0.0001	25.5432	4.67487	0.0261172	0.641158	up	yes
263695	u	chr8.1	.	2532422	2533110	MSTRG.138865.1	1	689	MSTRG.138865	.	1.71996	0.0001	3.6518	0.0001	0.0001	0.0001	17906.2	14.1282	0.0261307	0.641158	up	yes
191839	o	chr5.3	+	71944180	72030535	MSTRG.100870.2	3	226	MSTRG.100870	MS.gene70851	9153.87	189.292	4.88085	248.656	194.009	6.642	20.8054	4.37889	0.0261661	0.641158	up	yes
156781	u	chr4.3	-	89946806	89947508	MSTRG.82647.1	2	381	MSTRG.82647	.	10.4854	9.18271	8.18373	1.35125	0.0001	0.0001	20.6089	4.3652	0.0261662	0.641158	up	yes
281641	u	chr8.2	.	74527919	74528136	MSTRG.148213.1	1	218	MSTRG.148213	.	0.0001	0.0001	0.0001	5.94811	0.841627	3.6682	2.86864e-05	-15.0893	0.0261872	0.641158	down	yes
290043	u	chr8.3	+	61531558	61534305	MSTRG.152668.1	5	667	MSTRG.152668	.	0.0001	0.143836	0.0001	1.21823	0.935171	4.59434	0.0213458	-5.5499	0.0262166	0.641542	down	yes
117137	j	chr3.4	-	17065704	17066328	MSTRG.61660.2	3	439	MSTRG.61660	MS.gene97819	0.0001	2.5226	5.53417	0.0001	0.0001	0.0001	26856.2	14.713	0.0262264	0.641615	up	yes
229178	u	chr7.1	.	20986370	20986619	MSTRG.120754.1	1	250	MSTRG.120754	.	3.11395	12.954	0.0001	0.0001	0.0001	0.0001	53560.1	15.7089	0.026345	0.642677	up	yes
183017	u	chr5.2	.	72034764	72035491	MSTRG.96282.1	1	728	MSTRG.96282	.	0.0001	0.0001	0.0001	0.0001	2.43338	2.68684	5.859e-05	-14.059	0.0264051	0.643293	down	yes
33053	u	chr1.3	.	9455448	9455788	MSTRG.17339.1	1	341	MSTRG.17339	.	12.6322	7.14217	6.61303	1.12517	0.0001	0.0001	23.4478	4.55138	0.026421	0.643321	up	yes
146343	u	chr4.2	.	91791587	91791911	MSTRG.77194.1	1	325	MSTRG.77194	.	0.0001	0.0001	0.0001	0.0001	3.48559	7.97399	2.61787e-05	-15.2212	0.0264552	0.643624	down	yes
209778	u	chr6.2	-	22375597	22376320	MSTRG.110338.1	1	724	MSTRG.110338	.	1.1402	1.12561	0.521222	0.673151	8.91851	17.5518	0.102678	-3.2838	0.0264738	0.643624	down	yes
75225	u	chr2.3	+	67940395	67947288	MSTRG.39512.1	2	249	MSTRG.39512	.	0.0001	0.0001	0.0001	6.26419	0.0001	7.84323	2.12653e-05	-15.5211	0.0266051	0.646481	down	yes
135768	u	chr4.1	.	87927804	87928055	MSTRG.71609.1	1	252	MSTRG.71609	.	0.0001	0.0001	0.0001	4.21403	4.39602	0.587856	3.26161e-05	-14.9041	0.0266204	0.646515	down	yes
225413	u	chr6.4	.	59569965	59570895	MSTRG.118798.1	1	931	MSTRG.118798	.	2.27649	3.45802	3.82565	0.311611	0.371751	0.256058	10.1767	3.34719	0.0266565	0.647075	up	yes
300059	u	chr8.4	.	68790434	68790857	MSTRG.157817.1	1	424	MSTRG.157817	.	0.0001	0.0001	0.0001	0.0001	2.83893	5.82932	3.46087e-05	-14.8185	0.0266714	0.64725	down	yes
187249	u	chr5.3	+	20315766	20319862	MSTRG.98518.5	2	685	MSTRG.98518	.	0.0001	0.0001	0.0001	4.14243	0.0001	1.26509	5.54773e-05	-14.1377	0.0267074	0.647788	down	yes
147198	u	chr4.3	+	3381907	3390695	MSTRG.77646.1	2	838	MSTRG.77646	.	1.07813	4.93413	11.0823	0.0001	0.733958	0.0001	23.2846	4.5413	0.0267367	0.648114	up	yes
79592	x	chr2.4	+	25281414	25282036	MSTRG.41848.1	2	521	MSTRG.41848	MS.gene56176	0.0001	0.0001	0.0001	5.33001	2.23895	0.0001	3.9635e-05	-14.6229	0.0267487	0.648114	down	yes
7836	u	50410	.	15896	16202	MSTRG.4196.1	1	307	MSTRG.4196	.	0.0001	8.99371	3.04076	0.0001	0.0001	0.0001	40115.2	15.2919	0.0267734	0.648179	up	yes
8418	u	51417	+	15341	17380	MSTRG.4488.1	5	491	MSTRG.4488	.	1.66135	3.53489	0.104168	0.0001	0.0001	0.0001	17668	14.1089	0.026795	0.648399	up	yes
8228	u	51030	.	4813	5476	MSTRG.4369.1	1	664	MSTRG.4369	.	0.0001	0.0001	0.0001	0.0001	3.94328	1.70548	5.3108e-05	-14.2007	0.0269307	0.65073	down	yes
31652	i	chr1.2	+	86573433	86573802	MSTRG.16564.1	1	370	MSTRG.16564	MS.gene90890	3.82746	0.0001	6.02634	0.0001	0.0001	0.0001	32846.3	15.0034	0.0269404	0.650739	up	yes
247251	u	chr7.3	.	18907732	18908186	MSTRG.130266.1	1	455	MSTRG.130266	.	4.61195	0.0001	3.49577	0.0001	0.0001	0.0001	27026.1	14.7221	0.0269596	0.650759	up	yes
83155	u	chr2.4	.	64018577	64019244	MSTRG.43613.1	1	668	MSTRG.43613	.	0.0001	3.48026	1.87392	0.0001	0.0001	0.0001	17847.6	14.1234	0.0269606	0.650759	up	yes
94882	u	chr3.1	+	89367355	89368547	MSTRG.49898.2	3	481	MSTRG.49898	.	0.0001	0.0001	0.0001	0.0001	3.18701	4.41297	3.94733e-05	-14.6288	0.0270322	0.651778	down	yes
105991	i	chr3.3	.	8840112	8840497	MSTRG.55734.1	1	386	MSTRG.55734	MS.gene046235	0.37314	2.75944	2.51685	0.0001	0.0001	0.0001	18831.4	14.2009	0.0270423	0.651816	up	yes
259193	u	chr7.4	.	38490550	38490790	MSTRG.136498.1	1	241	MSTRG.136498	.	0.0001	8.77434	5.91228	0.0001	0.0001	0.0001	48955.7	15.5792	0.0271653	0.653639	up	yes
238444	u	chr7.2	.	23966945	23967798	MSTRG.125623.1	1	854	MSTRG.125623	.	3.62081	0.0001	4.30105	0.0001	0.101724	0.0001	77.7242	6.28029	0.0271873	0.653828	up	yes
149387	j	chr4.3	-	19097307	19098085	MSTRG.78801.1	2	692	MSTRG.78801	MS.gene023134	0.0001	1.33602	3.71228	0.0001	0.0001	0.0001	16828	14.0386	0.0272475	0.654605	up	yes
166607	i	chr4.4	.	86132152	86132412	MSTRG.87791.1	1	261	MSTRG.87791	MS.gene052780	0.0001	0.0001	0.0001	0.120003	4.41751	5.05729	3.12669e-05	-14.965	0.0272987	0.655028	down	yes
291237	u	chr8.3	.	72301936	72302148	MSTRG.153291.1	1	213	MSTRG.153291	.	0.0001	0.0001	0.0001	0.0001	10.795	6.36071	1.74868e-05	-15.8034	0.0273099	0.655028	down	yes
132352	i	chr4.1	-	47504132	47504675	MSTRG.69836.1	2	456	MSTRG.69836	MS.gene61634	1.76986	6.79963	0.0001	0.0001	0.0001	0.0001	28565.3	14.802	0.0273142	0.655028	up	yes
11013	u	8695	+	17862	18939	MSTRG.5643.1	2	535	MSTRG.5643	.	0.0001	2.23626	4.22962	0.0001	0.0001	0.0001	21553.3	14.3956	0.0274128	0.656384	up	yes
46031	u	chr1.4	+	46095587	46104704	MSTRG.24301.1	2	372	MSTRG.24301	.	5.91253	1.01018	9.40215	0.49928	0.0001	0.0001	32.6837	5.0305	0.0275138	0.658097	up	yes
222556	u	chr6.4	-	16977096	16978254	MSTRG.117224.3	3	668	MSTRG.117224	.	3.58979	0.0001	1.97064	0.0001	0.0001	0.0001	18535.1	14.178	0.0275437	0.658175	up	yes
225011	u	chr6.4	.	55222059	55222301	MSTRG.118558.1	1	243	MSTRG.118558	.	0.0001	4.38331	9.83563	0.0001	0.0001	0.0001	47396.8	15.5325	0.0276172	0.658863	up	yes
172419	u	chr5.1	.	52121719	52122150	MSTRG.90791.1	1	432	MSTRG.90791	.	1.8365	0.312136	3.08045	0.0001	0.0001	0.0001	17430.3	14.0893	0.027622	0.658863	up	yes
108539	u	chr3.3	+	44744937	44745725	MSTRG.57082.1	2	371	MSTRG.57082	.	0.0001	3.02612	6.25738	0.0001	0.0001	0.0001	30945.3	14.9174	0.0276459	0.659097	up	yes
140962	i	chr4.2	+	33246118	33246662	MSTRG.74382.2	1	545	MSTRG.74382	MS.gene052292	2.71159	2.41943	4.61501	0.270107	0.13262	0.0001	24.1941	4.59658	0.0277062	0.659861	up	yes
175630	u	chr5.1	.	79203471	79203942	MSTRG.92500.1	1	472	MSTRG.92500	.	0.0001	1.10683	0.0001	17.3619	4.8787	3.52553	0.0429647	-4.54071	0.0277205	0.660033	down	yes
96502	u	chr3.2	.	11349167	11349469	MSTRG.50759.1	1	303	MSTRG.50759	.	0.0001	4.38585	6.97339	0.0001	0.0001	0.0001	37864.5	15.2086	0.0277419	0.660375	up	yes
292282	u	chr8.3	.	79768810	79769183	MSTRG.153789.1	1	374	MSTRG.153789	.	0.0001	0.0001	0.0001	2.31767	0.786033	2.40061	5.45028e-05	-14.1633	0.0279064	0.663414	down	yes
95913	u	chr3.2	.	5194301	5194530	MSTRG.50434.1	1	230	MSTRG.50434	.	3.64868	0.0001	12.0077	0.0001	0.0001	0.0001	52188.1	15.6714	0.0280045	0.665101	up	yes
85550	u	chr3.1	.	6511709	6512875	MSTRG.44927.1	1	1167	MSTRG.44927	.	1.80031	0.0001	1.2779	0.0001	0.0001	0.0001	10261	13.3249	0.0280186	0.665266	up	yes
268006	u	chr8.1	.	34853309	34853881	MSTRG.141227.1	1	573	MSTRG.141227	.	4.61909	2.04715	0.0001	0.0001	0.0001	0.0001	22221.2	14.4396	0.0281137	0.666511	up	yes
270726	u	chr8.1	.	65191753	65192029	MSTRG.142603.1	1	277	MSTRG.142603	.	0.0001	0.0001	0.0001	0.0001	8.10768	4.96508	2.29483e-05	-15.4113	0.0281901	0.667813	down	yes
218539	u	chr6.3	.	51644084	51644870	MSTRG.115044.1	1	787	MSTRG.115044	.	0.0001	0.0001	0.0001	0.0001	1.44442	3.14057	6.54295e-05	-13.8997	0.0282034	0.667959	down	yes
130677	i	chr4.1	.	31562346	31562866	MSTRG.68934.1	1	521	MSTRG.68934	MS.gene003655	1.28631	3.70316	6.16046	0.0001	0.37617	0.0001	29.6249	4.88874	0.0282259	0.668201	up	yes
42506	u	chr1.4	.	7535542	7536883	MSTRG.22504.1	1	1342	MSTRG.22504	.	0.0001	1.2087	1.33097	0.0001	0.0001	0.0001	8465.9	13.0474	0.0282291	0.668201	up	yes
282715	i	chr8.2	.	82997243	82997459	MSTRG.148770.1	1	217	MSTRG.148770	MS.gene061367	5.64812	15.5911	5.91483	0.0001	0.903153	0.0001	30.0592	4.90973	0.028283	0.668825	up	yes
204488	u	chr6.1	.	41561385	41561631	MSTRG.107400.1	1	247	MSTRG.107400	.	5.52042	0.0001	8.8735	0.0001	0.0001	0.0001	47980.1	15.5501	0.02829	0.668825	up	yes
2324	u	23352	.	106165	106981	MSTRG.1033.1	1	817	MSTRG.1033	.	1.21075	0.293339	1.01203	0.0001	0.0001	0.0001	8387.04	13.0339	0.0283547	0.670014	up	yes
219792	u	chr6.3	.	70293750	70293971	MSTRG.115694.1	1	222	MSTRG.115694	.	0.0001	0.0001	0.0001	0.0001	11.4891	5.08732	1.80979e-05	-15.7538	0.0283883	0.670356	down	yes
18720	u	chr1.1	.	67046440	67046892	MSTRG.9690.1	1	453	MSTRG.9690	.	0.0001	0.0001	0.0001	1.88928	1.88703	0.710394	6.68642e-05	-13.8684	0.028475	0.67159	down	yes
152902	u	chr4.3	-	45278719	45279192	MSTRG.80641.1	3	235	MSTRG.80641	.	0.0001	0.0001	0.0001	8.74488	7.23075	0.0001	1.87785e-05	-15.7006	0.0284788	0.67159	down	yes
134171	u	chr4.1	.	72515524	72515887	MSTRG.70740.1	1	364	MSTRG.70740	.	0.423489	2.31504	3.07648	0.0001	0.0001	0.0001	19383.3	14.2425	0.0284868	0.671609	up	yes
220853	u	chr6.3	.	80871204	80872639	MSTRG.116356.1	1	1436	MSTRG.116356	.	0.0001	0.0001	0.0001	0.0001	1.06957	1.40031	0.000121458	-13.0073	0.0285174	0.672161	down	yes
298871	u	chr8.4	.	57059052	57059767	MSTRG.157211.1	1	716	MSTRG.157211	.	0.0001	0.0001	0.0001	0.0001	1.11656	3.92179	5.95421e-05	-14.0357	0.0285349	0.672203	down	yes
241819	u	chr7.2	.	62589470	62589758	MSTRG.127432.1	1	289	MSTRG.127432	.	0.0001	0.0001	0.0001	0.0001	5.08249	7.10665	2.46119e-05	-15.3103	0.0285368	0.672203	down	yes
16022	i	chr1.1	.	47675413	47676172	MSTRG.8224.1	1	760	MSTRG.8224	MS.gene051435	0.0001	0.0001	0.0001	1.66337	0.0001	2.78886	6.73805e-05	-13.8573	0.0285408	0.672203	down	yes
14931	i	chr1.1	+	34971458	34971685	MSTRG.7699.2	1	228	MSTRG.7699	MS.gene073638	3.64936	4.34534	1.10967	0.0001	0.0001	0.0001	30347.9	14.8893	0.028591	0.672878	up	yes
186870	u	chr5.3	.	16697240	16697605	MSTRG.98334.1	1	366	MSTRG.98334	.	2.13596	0.0001	7.50057	0.0001	0.0001	0.0001	32122.1	14.9713	0.0287093	0.674786	up	yes
80482	u	chr2.4	.	33747239	33747755	MSTRG.42264.1	1	517	MSTRG.42264	.	0.0001	2.45354	4.05754	0.0001	0.0001	0.0001	21703.9	14.4057	0.0287154	0.674786	up	yes
278155	u	chr8.2	.	36479170	36479745	MSTRG.146421.1	1	576	MSTRG.146421	.	3.55658	2.96726	5.08372	0.464241	0.0001	0.0001	24.9926	4.64343	0.0287298	0.674955	up	yes
282647	u	chr8.2	-	82481428	82484251	MSTRG.148729.1	3	799	MSTRG.148729	.	0.0001	0.0001	0.0001	0.0001	3.16829	1.36032	6.6244e-05	-13.8819	0.0288168	0.676319	down	yes
181466	u	chr5.2	.	58018025	58018881	MSTRG.95503.1	1	857	MSTRG.95503	.	0.0001	0.0001	0.0001	0.0001	1.16525	2.9862	7.22622e-05	-13.7564	0.0288317	0.67633	down	yes
218205	u	chr6.3	.	44993036	44993662	MSTRG.114855.1	1	627	MSTRG.114855	.	0.0001	0.0001	0.0001	2.27914	0.0001	3.11563	5.56084e-05	-14.1343	0.0289208	0.67757	down	yes
194388	u	chr5.4	.	10219702	10220406	MSTRG.102202.1	1	705	MSTRG.102202	.	0.0001	0.0001	0.0001	0.0001	2.30556	2.66046	6.04093e-05	-14.0149	0.0289725	0.6779	down	yes
198704	i	chr5.4	.	55409410	55409687	MSTRG.104443.1	1	278	MSTRG.104443	MS.gene88797	0.0001	0.0001	0.0001	0.0001	10.2364	3.07698	2.25336e-05	-15.4376	0.0289772	0.6779	down	yes
216572	u	chr6.3	.	20333638	20333944	MSTRG.114009.1	1	307	MSTRG.114009	.	1.3532	1.18645	3.66206	3.00457	11.0767	48.5819	0.0989689	-3.33688	0.0290321	0.678536	down	yes
280978	u	chr8.2	.	68695983	68696856	MSTRG.147864.1	1	874	MSTRG.147864	.	0.954731	0.24374	1.15737	0.0001	0.0001	0.0001	7852.81	12.939	0.029035	0.678536	up	yes
296284	i	chr8.4	.	28280121	28280615	MSTRG.155894.1	1	495	MSTRG.155894	MS.gene28505	0.0001	2.92523	3.85879	0.0001	0.0001	0.0001	22613.7	14.4649	0.0290876	0.679276	up	yes
219424	u	chr6.3	.	66370759	66371744	MSTRG.115506.1	1	986	MSTRG.115506	.	2.73774	1.08831	0.0001	0.0001	0.0001	0.0001	12753.9	13.6386	0.0293717	0.683442	up	yes
131736	i	chr4.1	.	40512376	40513443	MSTRG.69494.1	1	1068	MSTRG.69494	MS.gene09101	0.0001	0.0001	0.0001	2.10346	0.0001	1.13457	9.26459e-05	-13.3979	0.0293834	0.683442	down	yes
120756	u	chr3.4	.	65267557	65268141	MSTRG.63508.1	1	585	MSTRG.63508	.	2.05818	1.77557	0.172994	0.0001	0.0001	0.0001	13355.8	13.7052	0.0294291	0.684334	up	yes
197020	u	chr5.4	.	32556326	32557020	MSTRG.103562.1	1	695	MSTRG.103562	.	0.0001	2.78039	2.08058	0.0001	0.0001	0.0001	16203.5	13.984	0.0295416	0.685928	up	yes
160846	j	chr4.4	+	27262860	27263426	MSTRG.84918.1	2	469	MSTRG.84918	MS.gene006967	0.359731	0.0001	0.0001	3.77352	1.10989	6.50898	0.031594	-4.98421	0.0296178	0.686842	down	yes
301130	u	chr8.4	.	77930885	77931253	MSTRG.158408.1	1	369	MSTRG.158408	.	0.454849	2.24375	2.82333	0.0001	0.0001	0.0001	18406.4	14.1679	0.0296451	0.687136	up	yes
101069	u	chr3.2	.	66781708	66782607	MSTRG.53150.1	1	900	MSTRG.53150	.	0.0001	1.63423	2.05214	0.0001	0.0001	0.0001	12288.2	13.585	0.0296934	0.687915	up	yes
31088	u	chr1.2	+	82913897	82914518	MSTRG.16283.2	2	458	MSTRG.16283	.	1.74372	0.474167	2.17918	0.0001	0.0001	0.0001	14656.9	13.8393	0.0297185	0.688325	up	yes
192556	u	chr5.3	.	77233175	77233539	MSTRG.101229.1	1	365	MSTRG.101229	.	0.0001	0.0001	0.0001	3.30264	2.68472	0.23938	4.81793e-05	-14.3412	0.0297968	0.689627	down	yes
179392	u	chr5.2	.	28342375	28342589	MSTRG.94450.1	1	215	MSTRG.94450	.	0.0001	0.0001	0.0001	0.0001	12.5665	4.2454	1.78444e-05	-15.7742	0.0298669	0.690876	down	yes
230251	i	chr7.1	.	29115648	29115970	MSTRG.121363.1	1	323	MSTRG.121363	MS.gene87706	3.18363	2.8761	0.516095	0.0001	0.0001	0.0001	21919.4	14.4199	0.0299284	0.691529	up	yes
182723	u	chr5.2	.	69826638	69826971	MSTRG.96149.1	1	334	MSTRG.96149	.	5.00731	4.0734	4.56339	0.0001	0.0001	0.396164	34.4231	5.10531	0.0300066	0.692425	up	yes
30903	u	chr1.2	+	81544309	81545174	MSTRG.16183.1	2	657	MSTRG.16183	.	1.82539	3.79263	0.0001	0.0001	0.0001	0.0001	18727.1	14.1928	0.0300223	0.692555	up	yes
9093	u	56112	.	213090	214955	MSTRG.4812.1	1	1866	MSTRG.4812	.	0.585446	36.571	10.1026	2.03047	2.67415	0.172652	9.68965	3.27644	0.0300504	0.692923	up	yes
36288	u	chr1.3	.	43194467	43194761	MSTRG.19067.1	1	295	MSTRG.19067	.	0.0001	6.89886	4.49275	0.0001	0.0001	0.0001	37972.4	15.2127	0.0300858	0.69328	up	yes
131600	u	chr4.1	.	38879746	38880193	MSTRG.69421.1	1	448	MSTRG.69421	.	0.0001	0.0001	0.0001	3.96479	4.09619	0.0001	3.72159e-05	-14.7137	0.0300947	0.69328	down	yes
37695	o	chr1.3	+	55363882	55365042	MSTRG.19828.2	3	224	MSTRG.19828	MS.gene07468	10.4368	5.90426	0.0001	0.0001	0.0001	0.0001	54470.6	15.7332	0.0301051	0.693328	up	yes
14166	u	chr1.1	-	26052869	26053411	MSTRG.7317.1	1	543	MSTRG.7317	.	155.966	3135.6	221.783	0.0001	132.889	41.111	20.1917	4.33569	0.0302288	0.694467	up	yes
185231	u	chr5.3	+	4369942	4370636	MSTRG.97448.1	3	368	MSTRG.97448	.	0.0001	0.0001	0.0001	2.85974	0.532566	2.17154	5.39195e-05	-14.1788	0.0302831	0.695373	down	yes
239448	u	chr7.2	.	31709714	31710830	MSTRG.126134.1	1	1117	MSTRG.126134	.	0.577325	0.947941	0.375953	10.443	6.67635	0.515577	0.10781	-3.21344	0.0304862	0.698321	down	yes
214221	x	chr6.2	-	87528526	87533739	MSTRG.112745.3	2	1909	MSTRG.112745	MS.gene059623	0.0001	0.230495	1.5541	4.42959	9.29434	7.6749	0.0834017	-3.58378	0.0305379	0.698916	down	yes
229651	i	chr7.1	.	24415599	24416107	MSTRG.121031.1	1	509	MSTRG.121031	MS.gene024021	3.41787	3.72319	0.0001	0.0001	0.0001	0.0001	23803.9	14.5389	0.030542	0.698916	up	yes
173059	u	chr5.1	.	57971561	57971838	MSTRG.91086.1	1	278	MSTRG.91086	.	0.573765	3.48228	3.08749	0.0001	0.0001	0.0001	23811.8	14.5394	0.0305882	0.699369	up	yes
204971	u	chr6.1	.	51583179	51584927	MSTRG.107623.1	1	1749	MSTRG.107623	.	0.269003	0.293185	0.0001	3.61814	0.939673	2.72667	0.0771898	-3.69545	0.0305917	0.699369	down	yes
266932	u	chr8.1	.	26250479	26251323	MSTRG.140660.1	1	845	MSTRG.140660	.	0.0001	0.165686	0.0001	8.78716	0.0001	1.1023	0.0167738	-5.89764	0.0306048	0.699496	down	yes
187950	u	chr5.3	.	26169059	26169357	MSTRG.98882.1	1	299	MSTRG.98882	.	0.0001	0.0001	0.0001	8.53862	3.70036	0.0001	2.45116e-05	-15.3162	0.0306746	0.700065	down	yes
150063	u	chr4.3	.	23261426	23261923	MSTRG.79156.1	1	498	MSTRG.79156	.	0.0001	2.7874	3.77374	0.0001	0.0001	0.0001	21870.8	14.4167	0.0307579	0.701112	up	yes
101147	u	chr3.2	.	67452815	67453173	MSTRG.53186.1	1	359	MSTRG.53186	.	0.0001	3.55196	5.51388	0.0001	0.0001	0.0001	30219.8	14.8832	0.0307961	0.701759	up	yes
219223	u	chr6.3	.	63834788	63835274	MSTRG.115414.1	1	487	MSTRG.115414	.	1.98595	0.108582	2.71799	0.0001	0.0001	0.0001	16041.7	13.9695	0.0308164	0.701759	up	yes
108870	u	chr3.3	-	48205002	48205457	MSTRG.57233.1	1	456	MSTRG.57233	.	3.72812	1.06438	0.0001	40.257	10.0772	7.442	0.0829511	-3.59159	0.0308431	0.702018	down	yes
282552	u	chr8.2	.	81767123	81767324	MSTRG.148686.1	1	202	MSTRG.148686	.	0.0001	0.0001	0.0001	0.434152	4.23869	6.39558	2.71041e-05	-15.1711	0.0308632	0.702141	down	yes
12039	i	chr1.1	+	6505599	6506050	MSTRG.6200.2	1	452	MSTRG.6200	MS.gene33045	0.0001	25.9091	9.51877	0.0001	0.430518	0.775605	29.371	4.87632	0.0308959	0.702343	up	yes
84873	u	chr2.4	.	76303545	76303930	MSTRG.44523.1	1	386	MSTRG.44523	.	0.0001	0.0001	0.0001	0.0001	5.0143	3.79012	3.40734e-05	-14.841	0.0309021	0.702343	down	yes
201423	u	chr5.4	.	78317187	78317614	MSTRG.105866.1	1	428	MSTRG.105866	.	0.0001	0.0001	0.0001	0.0001	2.22783	5.76728	3.75225e-05	-14.7019	0.0309149	0.702464	down	yes
212390	u	chr6.2	+	67971477	67988766	MSTRG.111685.1	2	1906	MSTRG.111685	.	1.43476	1.00665	0.310638	9.27099	2.31321	6.14155	0.155257	-2.68727	0.0309381	0.702821	down	yes
297717	u	chr8.4	.	40483425	40483779	MSTRG.156618.1	1	355	MSTRG.156618	.	0.0001	0.0001	0.0001	0.0001	4.91772	4.66823	3.12955e-05	-14.9637	0.0311123	0.705918	down	yes
241234	u	chr7.2	.	51760114	51760773	MSTRG.127111.1	1	660	MSTRG.127111	.	0.0001	2.25039	2.66361	0.0001	0.0001	0.0001	16380.3	13.9997	0.031173	0.706816	up	yes
239840	u	chr7.2	.	35574737	35574989	MSTRG.126360.1	1	253	MSTRG.126360	.	5.20131	0.0001	8.07676	0.0001	0.0001	0.0001	44260.6	15.4337	0.0311745	0.706816	up	yes
270450	u	chr8.1	.	62040534	62040994	MSTRG.142453.1	1	461	MSTRG.142453	.	0.0001	5.32667	2.00764	0.0001	0.0001	0.0001	24448	14.5774	0.0312153	0.707055	up	yes
269007	o	chr8.1	-	43765102	43991753	MSTRG.141769.2	3	377	MSTRG.141769	MS.gene63149	0.958279	0.37241	0.0001	10.495	4.84965	5.82447	0.0628645	-3.99161	0.0312401	0.707273	down	yes
34782	u	chr1.3	-	24946609	24948274	MSTRG.18339.2	2	1635	MSTRG.18339	.	0.581342	0.0001	1.46297	0.0001	0.0001	0.0001	6814.69	12.7344	0.0312582	0.707426	up	yes
100741	u	chr3.2	.	64211198	64211669	MSTRG.52969.1	1	472	MSTRG.52969	.	5.12518	2.4984	0.0001	0.0001	0.0001	0.0001	25412.3	14.6332	0.0312713	0.707426	up	yes
76257	i	chr2.3	.	75262444	75263137	MSTRG.40077.1	1	694	MSTRG.40077	MS.gene002100	0.0001	0.0001	0.0001	2.67547	2.47532	0.0001	5.82423e-05	-14.0676	0.0312791	0.707426	down	yes
15589	i	chr1.1	.	43926760	43927088	MSTRG.8000.1	1	329	MSTRG.8000	MS.gene46918	0.0001	0.0001	0.0001	0.0001	4.67052	5.6499	2.90683e-05	-15.0702	0.0312846	0.707426	down	yes
225531	u	chr6.4	+	60730891	60748366	MSTRG.118861.1	2	1514	MSTRG.118861	.	13.0587	12.5277	5.02842	48.904	56.4214	49.5126	0.197721	-2.33846	0.0313785	0.708488	down	yes
203953	u	chr6.1	.	31089887	31090227	MSTRG.107132.1	1	341	MSTRG.107132	.	0.0001	0.0001	0.0001	0.0001	2.95112	7.01937	3.00885e-05	-15.0204	0.0313922	0.708488	down	yes
106638	u	chr3.3	.	15522166	15523172	MSTRG.56082.1	1	1007	MSTRG.56082	.	3.22027	6.6467	3.72242	0.54975	0.608711	0.578799	7.82231	2.96759	0.0314851	0.709276	up	yes
217586	u	chr6.3	-	34472635	34473064	MSTRG.114505.1	1	430	MSTRG.114505	.	0.048791	0.0001	0.0001	0.048712	2.30297	6.45511	0.00556287	-7.48996	0.0315538	0.709565	down	yes
222772	j	chr6.4	-	20868746	20871547	MSTRG.117331.1	4	751	MSTRG.117331	MS.gene81487	0.0001	2.37381	1.94325	0.0001	0.0001	0.0001	14390.5	13.8128	0.0316428	0.711055	up	yes
299880	j	chr8.4	+	67446477	67447282	MSTRG.157720.2	3	569	MSTRG.157720	MS.gene79702	0.0001	0.0001	0.0001	4.34219	1.9528	0.0001	4.76562e-05	-14.357	0.0317271	0.711776	down	yes
83625	u	chr2.4	.	67943581	67944202	MSTRG.43839.1	1	622	MSTRG.43839	.	0.0001	0.0001	0.0001	0.0001	2.97322	2.46722	5.51416e-05	-14.1465	0.0317346	0.711776	down	yes
260033	i	chr7.4	.	48660800	48661028	MSTRG.136980.1	1	229	MSTRG.136980	MS.gene022974	0.0001	0.0001	0.0001	0.434253	4.81327	3.81544	3.31018e-05	-14.8827	0.0317364	0.711776	down	yes
80153	u	chr2.4	+	31191375	31191788	MSTRG.42112.1	1	414	MSTRG.42112	.	0.402533	0.0001	0.161062	1.18021	6.34211	4.81588	0.045687	-4.45207	0.0317517	0.71179	down	yes
295907	u	chr8.4	.	25000201	25000667	MSTRG.155704.1	1	467	MSTRG.155704	.	0.0001	0.0001	0.0001	2.08583	0.0001	4.76286	4.38034e-05	-14.4786	0.0318234	0.712715	down	yes
122360	u	chr3.4	.	77543053	77543328	MSTRG.64411.1	1	276	MSTRG.64411	.	0.0001	0.0001	0.0001	6.22021	6.57478	0.0001	2.34465e-05	-15.3803	0.0318996	0.713592	down	yes
184103	u	chr5.2	.	80293648	80293943	MSTRG.96860.1	1	296	MSTRG.96860	.	0.0001	0.0001	0.0001	5.23405	0.0001	5.58253	2.7735e-05	-15.1379	0.0319427	0.714124	down	yes
292283	u	chr8.3	.	79769789	79770649	MSTRG.153791.1	1	861	MSTRG.153791	.	0.0001	0.0001	0.0001	2.08511	0.0001	1.63202	8.07053e-05	-13.597	0.0319474	0.714124	down	yes
213085	i	chr6.2	.	76062163	76062608	MSTRG.112104.1	1	446	MSTRG.112104	MS.gene40439	0.376321	1.90041	2.09308	0.0001	0.0001	0.0001	14566	13.8303	0.0320027	0.714941	up	yes
66090	u	chr2.2	+	60630397	60632417	MSTRG.34707.3	3	558	MSTRG.34707	.	6.79704	8.37437	1.83819	0.032186	0.023508	0.997137	16.1561	4.014	0.0320376	0.715347	up	yes
245932	i	chr7.3	.	9548029	9548419	MSTRG.129599.1	1	391	MSTRG.129599	MS.gene24706	5.58135	3.52863	0.0001	0.0001	0.0001	0.0001	30366.9	14.8902	0.0320404	0.715347	up	yes
295823	u	chr8.4	.	24170702	24171019	MSTRG.155660.1	1	318	MSTRG.155660	.	3.04325	2.79878	0.521236	0.0001	0.0001	0.0001	21210.9	14.3725	0.0320553	0.715509	up	yes
286971	u	chr8.3	.	29804518	29804775	MSTRG.151089.1	1	258	MSTRG.151089	.	0.0001	4.06991	8.19945	0.0001	0.0001	0.0001	40898.2	15.3198	0.0321078	0.716339	up	yes
87179	u	chr3.1	+	24848824	24855664	MSTRG.45741.1	2	590	MSTRG.45741	.	2.16429	1.55995	4.23149	25.2216	15.4674	11.4674	0.152536	-2.71278	0.03217	0.717047	down	yes
254617	x	chr7.4	+	3668580	3669278	MSTRG.134089.1	2	322	MSTRG.134089	MS.gene78572	0.0001	0.0001	0.0001	2.86582	2.50797	0.667759	4.96561e-05	-14.2977	0.0321702	0.717047	down	yes
25208	u	chr1.2	.	37115282	37115661	MSTRG.13205.1	1	380	MSTRG.13205	.	0.0001	0.0001	0.0001	0.434784	2.43151	2.30877	5.79703e-05	-14.0743	0.0321874	0.717185	down	yes
108764	u	chr3.3	+	47287513	47288172	MSTRG.57161.1	1	660	MSTRG.57161	.	0.246907	7.11178	1.98835	0.326201	0.0001	0.031325	26.1364	4.70799	0.0322499	0.718137	up	yes
207393	u	chr6.1	.	79232832	79233330	MSTRG.109069.1	1	499	MSTRG.109069	.	0.0001	2.67577	3.66193	0.0001	0.0001	0.0001	21126	14.3667	0.0323426	0.719709	up	yes
275772	o	chr8.2	+	18060258	18110391	MSTRG.145193.1	2	281	MSTRG.145193	MS.gene001162	9.58951	0.0001	3.00528	0.0001	0.0001	0.0001	41983	15.3575	0.032427	0.720881	up	yes
107239	i	chr3.3	.	24500581	24501062	MSTRG.56367.1	1	482	MSTRG.56367	MS.gene46602	2.00902	1.4364	2.07509	0.042907	0.0001	0.0001	128.065	7.00074	0.0324544	0.721319	up	yes
14804	x	chr1.1	-	33798400	33832763	MSTRG.7637.1	2	491	MSTRG.7637	MS.gene068221	0.0001	0.0001	0.0001	0.0001	3.91977	2.93889	4.37397e-05	-14.4807	0.0324682	0.721403	down	yes
57041	u	chr2.1	.	53776962	53777713	MSTRG.29974.1	1	752	MSTRG.29974	.	0.0001	0.0001	0.0001	0.0001	1.8441	2.55732	6.81584e-05	-13.8408	0.0326095	0.722883	down	yes
200754	u	chr5.4	.	72815974	72816506	MSTRG.105532.1	1	533	MSTRG.105532	.	0.0001	0.0001	0.0001	0.0001	2.4722	3.7238	4.84176e-05	-14.3341	0.0326198	0.722931	down	yes
162091	u	chr4.4	.	35828043	35828319	MSTRG.85536.1	1	277	MSTRG.85536	.	0.0001	0.0001	0.0001	2.95966	0.875624	2.87196	4.47278e-05	-14.4485	0.0326671	0.72361	down	yes
292388	u	chr8.3	.	80366148	80366597	MSTRG.153817.1	1	450	MSTRG.153817	.	0.0001	2.31159	4.70557	0.0001	0.0001	0.0001	23390.9	14.5137	0.0326736	0.72361	up	yes
176049	i	chr5.2	.	1719671	1719918	MSTRG.92707.1	1	248	MSTRG.92707	MS.gene21776	0.628773	3.88068	3.22643	0.0001	0.0001	0.0001	25786.3	14.6543	0.0327204	0.724099	up	yes
83144	u	chr2.4	+	63984882	63986624	MSTRG.43606.1	4	498	MSTRG.43606	.	0.0001	2.86452	3.48031	0.0001	0.0001	0.0001	21149.8	14.3684	0.0328544	0.725552	up	yes
1799	u	17174	.	568647	569051	MSTRG.743.1	1	405	MSTRG.743	.	0.0001	0.0001	0.0001	0.238774	2.24281	2.48586	6.03932e-05	-14.0153	0.0328705	0.725622	down	yes
71959	u	chr2.3	.	36879977	36880379	MSTRG.37807.1	1	403	MSTRG.37807	.	0.0001	0.238998	0.0001	14.1109	2.90926	0.0001	0.0140537	-6.15291	0.0328731	0.725622	down	yes
5665	u	40992	.	15544	16747	MSTRG.2945.1	1	1204	MSTRG.2945	.	0.138413	0.343077	0.0001	7.31191	0.387819	1.07534	0.0548816	-4.18753	0.0328868	0.725754	down	yes
181321	i	chr5.2	.	56674843	56675268	MSTRG.95436.1	1	426	MSTRG.95436	MS.gene010067	0.0001	3.47844	3.8713	0.0001	0.0001	0.0001	24499.5	14.5805	0.0329434	0.726316	up	yes
78946	u	chr2.4	+	19156439	19156873	MSTRG.41522.1	1	435	MSTRG.41522	.	0.0001	2.12379	5.13406	0.0001	0.0001	0.0001	24193.2	14.5623	0.0329639	0.726339	up	yes
266029	u	chr8.1	.	19637163	19637385	MSTRG.140159.1	1	223	MSTRG.140159	.	0.0001	0.0001	0.0001	0.681195	3.75538	3.94068	3.58113e-05	-14.7692	0.032975	0.726339	down	yes
212881	u	chr6.2	+	74363968	74365302	MSTRG.111986.1	2	1248	MSTRG.111986	.	0.0001	0.651612	0.0001	1.78251	6.30939	3.86059	0.0545336	-4.19671	0.0329819	0.726339	down	yes
1210	u	15093	.	16960	17332	MSTRG.477.1	1	373	MSTRG.477	.	0.0001	0.0001	0.0001	5.61552	3.6873	0.0001	3.22479e-05	-14.9204	0.0330468	0.726596	down	yes
59999	u	chr2.1	+	75897431	75907957	MSTRG.31530.1	2	210	MSTRG.31530	.	4.4468	12.3044	0.0001	0.0001	0.0001	0.0001	55837.6	15.769	0.0330541	0.726596	up	yes
218117	u	chr6.3	.	43393675	43393964	MSTRG.114804.1	1	290	MSTRG.114804	.	0.0001	0.0001	0.0001	0.0001	7.6999	3.81756	2.60472e-05	-15.2285	0.0331738	0.728134	down	yes
213441	u	chr6.2	.	79127107	79127436	MSTRG.112331.1	1	330	MSTRG.112331	.	0.0001	0.0001	0.0001	0.0001	6.12214	3.92686	2.98534e-05	-15.0317	0.0332181	0.728593	down	yes
102382	u	chr3.2	.	75362135	75363459	MSTRG.53833.1	1	1325	MSTRG.53833	.	0.483776	0.814146	0.467908	4.65109	2.21747	6.08542	0.136316	-2.87498	0.0332526	0.729009	down	yes
153904	u	chr4.3	.	59105879	59106131	MSTRG.81148.1	1	253	MSTRG.81148	.	0.0001	6.72714	5.64681	0.0001	0.0001	0.0001	41246.8	15.332	0.0332663	0.729137	up	yes
222557	u	chr6.4	-	16978884	16980169	MSTRG.117227.1	3	457	MSTRG.117227	.	0.0001	4.89247	2.22586	0.0001	0.0001	0.0001	23728.1	14.5343	0.0332809	0.729286	up	yes
22990	u	chr1.2	.	13637448	13638047	MSTRG.12057.1	1	600	MSTRG.12057	.	0.0001	0.0001	0.0001	3.66781	2.12432	0.0001	5.17935e-05	-14.2369	0.0333505	0.73047	down	yes
204217	u	chr6.1	.	36551204	36551873	MSTRG.107263.1	1	670	MSTRG.107263	.	0.0001	0.072723	0.0001	0.0001	2.0476	5.35748	0.00984757	-6.66602	0.0334007	0.731396	down	yes
167454	o	chr5.1	-	1903066	1903941	MSTRG.88240.1	2	432	MSTRG.88240	MS.gene21855	0.0001	5.19804	2.25092	0.0001	0.0001	0.0001	24830.2	14.5998	0.0334748	0.732315	up	yes
1824	u	17238	.	358809	359278	MSTRG.758.1	1	470	MSTRG.758	.	0.0001	0.0001	0.0001	0.0001	3.15772	3.74021	4.34906e-05	-14.4889	0.0336267	0.734352	down	yes
55369	u	chr2.1	.	31724976	31725316	MSTRG.29165.1	1	341	MSTRG.29165	.	0.0001	0.0001	0.0001	0.0001	4.54284	4.99802	3.14434e-05	-14.9569	0.0336632	0.734508	down	yes
126554	u	chr4.1	.	4598163	4598497	MSTRG.66659.1	1	335	MSTRG.66659	.	0.0001	0.0001	0.0001	2.92874	7.43006	0.0001	2.89606e-05	-15.0755	0.0336912	0.734661	down	yes
249113	u	chr7.3	.	31757836	31758195	MSTRG.131312.1	1	360	MSTRG.131312	.	7.21649	0.0001	2.33378	0.0001	0.0001	0.0001	31834.6	14.9583	0.0337666	0.735962	up	yes
35146	u	chr1.3	.	28718545	28719004	MSTRG.18524.1	1	460	MSTRG.18524	.	3.28381	0.0001	3.76781	0.0001	0.0001	0.0001	23505.8	14.5207	0.0338178	0.736588	up	yes
150458	u	chr4.3	.	25605346	25606190	MSTRG.79367.1	1	845	MSTRG.79367	.	2.46311	1.57633	0.0001	0.0001	0.0001	0.0001	13465.1	13.7169	0.0338189	0.736588	up	yes
282078	u	chr8.2	.	78140366	78140842	MSTRG.148456.1	1	477	MSTRG.148456	.	0.0001	0.0001	0.742239	3.25453	15.5756	1.17819	0.0371065	-4.75218	0.0338471	0.736858	down	yes
23036	u	chr1.2	.	13956867	13957165	MSTRG.12163.1	1	299	MSTRG.12163	.	0.0001	0.0001	0.0001	3.12031	8.36997	0.0001	2.61088e-05	-15.2251	0.0339503	0.737781	down	yes
150352	i	chr4.3	.	24936709	24936970	MSTRG.79322.1	1	262	MSTRG.79322	MS.gene32021	0.0001	8.29523	3.83197	0.0001	0.0001	0.0001	40424.3	15.3029	0.0339983	0.738088	up	yes
24440	u	chr1.2	-	27974819	27975154	MSTRG.12820.3	2	304	MSTRG.12820	.	0.0001	0.0001	0.0001	0.0001	6.91226	3.81877	2.7956e-05	-15.1265	0.0340499	0.738769	down	yes
258946	u	chr7.4	.	36069075	36070223	MSTRG.136430.1	1	1149	MSTRG.136430	.	1.55553	0.071006	0.116065	4.22724	2.62992	9.90659	0.103951	-3.26603	0.0340546	0.738769	down	yes
277008	u	chr8.2	.	27622629	27623112	MSTRG.145849.1	1	484	MSTRG.145849	.	0.0001	2.20071	4.1554	0.0001	0.0001	0.0001	21187.4	14.3709	0.0341244	0.739793	up	yes
185636	u	chr5.3	.	7187485	7188065	MSTRG.97658.1	1	581	MSTRG.97658	.	3.28217	0.0001	2.35516	0.0001	0.0001	0.0001	18791.4	14.1978	0.0341726	0.740467	up	yes
31201	j	chr1.2	+	83678547	83679480	MSTRG.16342.2	3	230	MSTRG.16342	MS.gene89231	0.0001	8.76687	4.90792	0.0001	0.0001	0.0001	45583	15.4762	0.0341751	0.740467	up	yes
234439	u	chr7.1	.	84339591	84339987	MSTRG.123526.1	1	397	MSTRG.123526	.	3.92358	4.62753	0.0001	0.0001	0.0001	0.0001	28504	14.7989	0.0342221	0.740993	up	yes
228115	o	chr7.1	-	14075909	14147860	MSTRG.120169.1	2	302	MSTRG.120169	MS.gene018004	42.0168	9.42367	0.128534	32.9028	18.4792	529.284	0.0888102	-3.49313	0.0342899	0.741679	down	yes
70203	u	chr2.3	.	17219227	17219775	MSTRG.36911.1	1	549	MSTRG.36911	.	0.0001	0.0001	0.0001	0.0001	4.06101	1.96255	4.98036e-05	-14.2934	0.0343116	0.741788	down	yes
165713	u	chr4.4	.	78337194	78337634	MSTRG.87340.1	1	441	MSTRG.87340	.	2.48597	0.0001	4.67114	0.0001	0.0001	0.0001	23857.3	14.5421	0.0344612	0.743794	up	yes
25669	i	chr1.2	.	43717853	43718064	MSTRG.13434.1	1	212	MSTRG.13434	MS.gene46408	0.791695	0.0001	0.0001	9.0574	9.96903	4.24012	0.0340358	-4.8768	0.0344817	0.743794	down	yes
268365	u	chr8.1	.	38084653	38084878	MSTRG.141397.1	1	226	MSTRG.141397	.	0.0001	5.37319	8.09796	0.0001	0.0001	0.0001	44904.2	15.4546	0.0344852	0.743794	up	yes
80656	u	chr2.4	-	36368833	36369170	MSTRG.42366.1	2	303	MSTRG.42366	.	0.0001	0.0001	0.0001	2.86592	0.0001	7.28618	2.95502e-05	-15.0465	0.0345	0.743794	down	yes
286425	u	chr8.3	.	25796474	25797308	MSTRG.150793.1	1	835	MSTRG.150793	.	0.0001	0.0001	0.0001	1.90202	0.0001	1.77189	8.16546e-05	-13.5801	0.0345106	0.743794	down	yes
181743	u	chr5.2	.	60186338	60186966	MSTRG.95640.1	1	629	MSTRG.95640	.	8.66015	11.9381	9.56785	1.89469	2.01202	0.475034	6.88451	2.78335	0.0345147	0.743794	up	yes
222108	i	chr6.4	+	11217582	11218827	MSTRG.117018.1	2	1101	MSTRG.117018	MS.gene67981	0.8927	2.06376	0.210037	14.1656	8.14114	2.09201	0.129781	-2.94585	0.0345241	0.743803	down	yes
192702	u	chr5.3	.	78180011	78180248	MSTRG.101317.1	1	238	MSTRG.101317	.	0.0001	0.0001	0.0001	0.0001	4.09396	9.44531	2.21576e-05	-15.4618	0.0346096	0.744959	down	yes
147313	u	chr4.3	.	4059564	4060029	MSTRG.77711.1	1	466	MSTRG.77711	.	0.0001	0.0001	0.0001	2.35705	4.83254	0.0001	4.17264e-05	-14.5487	0.0346436	0.745298	down	yes
280269	u	chr8.2	.	61818058	61818300	MSTRG.147485.1	1	243	MSTRG.147485	.	0.0001	7.48117	5.20195	0.0001	0.0001	0.0001	42277.4	15.3676	0.0346492	0.745298	up	yes
258482	u	chr7.4	.	31088038	31088526	MSTRG.136170.1	1	489	MSTRG.136170	.	0.0001	2.80226	3.34732	0.0001	0.0001	0.0001	20498.9	14.3233	0.0348104	0.747387	up	yes
8217	u	51029	.	9553	10645	MSTRG.4368.1	1	1093	MSTRG.4368	.	1.62534	0.0001	1.32874	0.0001	0.0001	0.0001	9847.27	13.2655	0.0348684	0.748291	up	yes
67250	u	chr2.2	.	69175593	69177990	MSTRG.35340.1	1	2398	MSTRG.35340	.	1.30184	2.23512	0.0001	0.06302	0.0001	0.0001	55.9485	5.80603	0.0349676	0.749642	up	yes
44568	x	chr1.4	-	26820960	26910883	MSTRG.23591.1	2	282	MSTRG.23591	MS.gene053366	2.02736	2.45157	0.0001	8.2571	16.7677	24.2256	0.090944	-3.45888	0.0349715	0.749642	down	yes
232636	u	chr7.1	.	61854873	61855138	MSTRG.122581.1	1	266	MSTRG.122581	.	0.0001	8.14209	3.6739	0.0001	0.0001	0.0001	39386.9	15.2654	0.0349808	0.749669	up	yes
261339	u	chr7.4	-	70488586	70489581	MSTRG.137667.2	2	891	MSTRG.137667	.	1.77829	0.0001	1.76713	0.0001	0.0001	0.0001	11818.4	13.5287	0.0350194	0.749981	up	yes
36171	u	chr1.3	+	41974862	41975480	MSTRG.19011.1	2	577	MSTRG.19011	.	0.0001	0.0001	0.0001	4.22441	1.66578	0.0001	5.09312e-05	-14.2611	0.035062	0.750479	down	yes
104833	u	chr3.2	.	91371032	91371343	MSTRG.55101.1	1	312	MSTRG.55101	.	0.0001	0.0001	0.0001	4.23678	6.36174	0.0001	2.83056e-05	-15.1086	0.0350667	0.750479	down	yes
43175	u	chr1.4	.	12773890	12775274	MSTRG.22844.1	1	1385	MSTRG.22844	.	0.097978	0.0001	0.0001	1.09001	2.49791	0.239881	0.0256486	-5.28497	0.0351428	0.751763	down	yes
187295	u	chr5.3	.	20537305	20537559	MSTRG.98539.1	1	255	MSTRG.98539	.	0.0001	0.0001	0.0001	0.216483	3.33863	4.73071	3.62064e-05	-14.7534	0.0352535	0.753441	down	yes
27284	u	chr1.2	.	57737458	57737707	MSTRG.14228.1	1	250	MSTRG.14228	.	0.0001	7.53005	4.68743	0.0001	0.0001	0.0001	40725.3	15.3136	0.0353066	0.754232	up	yes
55310	i	chr2.1	.	31257752	31258536	MSTRG.29124.1	1	785	MSTRG.29124	MS.gene62501	0.0001	0.0001	0.0001	1.24477	3.00436	0.0001	7.06009e-05	-13.79	0.0354418	0.756428	down	yes
253344	u	chr7.3	.	84277664	84277889	MSTRG.133512.1	1	226	MSTRG.133512	.	57.6121	0.228967	0.26784	177.61	129.14	385.512	0.0839406	-3.57449	0.0354677	0.756464	down	yes
83463	i	chr2.4	.	66727005	66727398	MSTRG.43753.1	1	394	MSTRG.43753	MS.gene004458	5.71786	2.76653	0.0001	0.0001	0.0001	0.0001	28281.6	14.7876	0.0355221	0.757124	up	yes
298389	o	chr8.4	+	50604300	50689978	MSTRG.157003.1	2	387	MSTRG.157003	MS.gene38911	3.47407	4.92196	0.0001	0.0001	0.0001	0.0001	27987.1	14.7725	0.0356835	0.758063	up	yes
164105	u	chr4.4	.	55490436	55490717	MSTRG.86567.1	1	282	MSTRG.86567	.	2.83658	4.44815	0.22639	0.0001	0.0001	0.0001	25037.1	14.6118	0.0357087	0.758235	up	yes
7858	u	50553	.	33102	33326	MSTRG.4216.1	1	225	MSTRG.4216	.	0.0001	0.0001	0.0001	0.0001	8.48184	5.62995	2.12587e-05	-15.5216	0.0357778	0.758522	down	yes
231988	u	chr7.1	.	50269079	50269572	MSTRG.122254.1	1	494	MSTRG.122254	.	0.0001	0.0001	0.0001	0.0001	2.57874	3.73173	4.75393e-05	-14.3605	0.0357832	0.758522	down	yes
244363	u	chr7.2	.	92168466	92168732	MSTRG.128779.1	1	267	MSTRG.128779	.	0.0001	0.0001	0.0001	0.0001	9.092	3.0987	2.46087e-05	-15.3105	0.0358868	0.759192	down	yes
93160	i	chr3.1	.	78067874	78068786	MSTRG.48934.1	1	913	MSTRG.48934	MS.gene06291	0.0001	0.0001	0.0001	2.67426	0.971043	0.0001	8.22955e-05	-13.5688	0.035924	0.759192	down	yes
196937	i	chr5.4	.	31481663	31482584	MSTRG.103523.1	1	922	MSTRG.103523	MS.gene53084	0.0001	0.0001	0.0001	1.29067	2.27753	0.0001	8.40736e-05	-13.538	0.0359307	0.759192	down	yes
116821	o	chr3.4	-	13928933	14233756	MSTRG.61537.1	2	469	MSTRG.61537	MS.gene77993	2.983	3.35269	4.02725	0.046748	0.352464	0.0001	25.952	4.69777	0.0359318	0.759192	up	yes
96050	u	chr3.2	.	6632045	6632454	MSTRG.50499.1	1	410	MSTRG.50499	.	0.0001	0.0001	0.0001	0.0001	2.54543	5.02708	3.96165e-05	-14.6235	0.0359424	0.759192	down	yes
12910	u	chr1.1	.	13611389	13611747	MSTRG.6643.1	1	359	MSTRG.6643	.	0.0001	0.0001	0.0001	0.0001	2.87478	5.91315	3.41374e-05	-14.8383	0.0360416	0.760533	down	yes
66574	u	chr2.2	.	64598009	64598586	MSTRG.34952.1	1	578	MSTRG.34952	.	0.0001	0.0001	0.0001	0.0001	3.01559	2.38319	5.55671e-05	-14.1354	0.0360489	0.760533	down	yes
61654	u	chr2.2	+	11371511	11372506	MSTRG.32434.1	2	385	MSTRG.32434	.	0.0001	2.85066	4.82588	0.0001	0.0001	0.0001	25588.8	14.6432	0.0361297	0.761533	up	yes
187551	u	chr5.3	-	23025507	23027200	MSTRG.98662.1	5	435	MSTRG.98662	.	0.0001	0.0001	0.0001	4.24048	3.25651	0.0001	4.00155e-05	-14.6091	0.0361413	0.761533	down	yes
90509	u	chr3.1	.	59743030	59743519	MSTRG.47508.1	1	490	MSTRG.47508	.	0.0001	3.12652	2.94085	0.0001	0.0001	0.0001	20224.9	14.3038	0.0361609	0.761533	up	yes
244356	u	chr7.2	.	92093225	92093491	MSTRG.128771.1	1	267	MSTRG.128771	.	0.0001	7.3498	3.98515	0.0001	0.0001	0.0001	37783.5	15.2055	0.0361615	0.761533	up	yes
47452	j	chr1.4	+	59524742	59526478	MSTRG.25054.2	2	740	MSTRG.25054	MS.gene40011	0.0001	2.35865	1.7078	0.0001	0.0001	0.0001	13555.2	13.7266	0.0362622	0.762574	up	yes
149574	u	chr4.3	.	20202728	20202934	MSTRG.78905.1	1	207	MSTRG.78905	.	9.0685	6.60447	0.0001	0.0001	0.0001	0.0001	52243.6	15.673	0.036322	0.763028	up	yes
125501	u	chr3.4	.	98487407	98487720	MSTRG.66060.1	1	314	MSTRG.66060	.	0.0001	11.2225	6.79536	0.351612	0.0001	0.0001	51.2147	5.67849	0.0363642	0.76335	up	yes
289171	i	chr8.3	.	52837892	52838287	MSTRG.152263.1	1	396	MSTRG.152263	MS.gene36088	0.0001	0.740161	0.0001	0.0001	20.7564	10.4146	0.0237515	-5.39584	0.0363899	0.763591	down	yes
204486	u	chr6.1	.	41542536	41542742	MSTRG.107398.1	1	207	MSTRG.107398	.	6.15589	0.0001	8.65925	0.0001	0.0001	0.0001	49384.1	15.5918	0.0364207	0.764066	up	yes
13884	u	chr1.1	.	22888002	22888268	MSTRG.7164.1	1	267	MSTRG.7164	.	4.64437	7.63415	0.0001	0.0001	0.0001	0.0001	40928.7	15.3208	0.0364931	0.764815	up	yes
53668	u	chr2.1	.	15502134	15502827	MSTRG.28337.1	1	694	MSTRG.28337	.	0.0001	0.0001	0.0001	1.72795	3.00323	0.0001	6.34077e-05	-13.945	0.0366027	0.765838	down	yes
264780	u	chr8.1	.	9932088	9933177	MSTRG.139475.1	1	1090	MSTRG.139475	.	0.815817	2.21036	0.0001	0.0001	0.0001	0.0001	10087.6	13.3003	0.0366116	0.765838	up	yes
194673	u	chr5.4	+	12279966	12281632	MSTRG.102351.2	3	1483	MSTRG.102351	.	0.0001	2.15156	0.0001	44.3122	0.0001	43.9385	0.0243824	-5.35802	0.0366518	0.76633	down	yes
289644	u	chr8.3	.	57795953	57798400	MSTRG.152480.1	1	2448	MSTRG.152480	.	2.84179	0.639085	3.69882	0.677069	0.105468	0.12426	7.91764	2.98507	0.0369537	0.770687	up	yes
193932	o	chr5.4	+	6652099	6688945	MSTRG.101965.1	2	323	MSTRG.101965	MS.gene09750	0.0001	0.0001	0.0001	6.16379	0.0001	3.13348	3.22672e-05	-14.9196	0.0370088	0.771212	down	yes
33658	i	chr1.3	.	14342168	14343236	MSTRG.17703.1	1	1069	MSTRG.17703	MS.gene054108	2.02549	0.099639	0.124751	8.69402	9.05294	2.61414	0.110499	-3.1779	0.0370348	0.771231	down	yes
91700	o	chr3.1	-	68041651	68041986	MSTRG.48154.2	2	226	MSTRG.48154	MS.gene70733	0.0001	0.0001	0.0001	0.0001	7.78777	5.91607	2.18915e-05	-15.4793	0.0370375	0.771231	down	yes
1798	u	17174	.	565455	565860	MSTRG.742.1	1	406	MSTRG.742	.	0.0001	0.0001	0.0001	0.121504	2.24413	2.55834	6.09263e-05	-14.0026	0.0370509	0.771231	down	yes
259296	x	chr7.4	-	39400533	39401135	MSTRG.136561.1	2	558	MSTRG.136561	MS.gene055151	0.0001	1.08498	0.0001	4.03758	11.2442	4.55965	0.0546927	-4.19251	0.0370791	0.771646	down	yes
184465	u	chr5.2	+	83275304	83275880	MSTRG.97055.1	2	493	MSTRG.97055	.	0.0001	0.0001	0.0001	1.692	0.0001	4.24036	5.05693e-05	-14.2714	0.0371006	0.77179	down	yes
205991	x	chr6.1	+	66160270	66538915	MSTRG.108302.1	2	476	MSTRG.108302	MS.gene069704	0.352603	0.014812	0.020532	3.15512	1.84403	4.05815	0.0428325	-4.54515	0.0372135	0.773375	down	yes
116029	u	chr3.4	.	5289149	5289676	MSTRG.61050.1	1	528	MSTRG.61050	.	0.0001	0.361973	0.0001	1.64205	1.48473	6.09122	0.0392897	-4.6697	0.0373242	0.774333	down	yes
172201	i	chr5.1	.	49751025	49751363	MSTRG.90700.1	1	339	MSTRG.90700	MS.gene64140	3.60089	5.80661	0.0001	0.0001	0.0001	0.0001	31358.7	14.9366	0.0374089	0.775404	up	yes
96703	u	chr3.2	.	13629709	13629973	MSTRG.50844.1	1	265	MSTRG.50844	.	3.45575	3.22123	0.281958	0.0001	0.0001	0.0001	23196.5	14.5016	0.0375047	0.7767	up	yes
75912	i	chr2.3	-	72888995	72890942	MSTRG.39877.1	2	1855	MSTRG.39877	MS.gene002289	3.67773	14.272	14.6439	4.08477	0.503907	0.236478	6.75495	2.75594	0.037529	0.77686	up	yes
65618	i	chr2.2	-	56450026	56455121	MSTRG.34457.1	2	377	MSTRG.34457	MS.gene058335	0.0001	0.372351	0.0001	0.7001	4.26057	7.18777	0.0306666	-5.02719	0.0376524	0.777864	down	yes
49375	u	chr1.4	.	73290432	73290735	MSTRG.26026.1	1	304	MSTRG.26026	.	0.0001	4.04865	5.44766	0.0001	0.0001	0.0001	31654.7	14.9501	0.037694	0.777972	up	yes
266028	u	chr8.1	.	19623217	19623432	MSTRG.140157.1	1	216	MSTRG.140157	.	0.0001	0.0001	0.0001	0.0001	8.01479	6.03599	2.1351e-05	-15.5153	0.0377136	0.778097	down	yes
133452	u	chr4.1	.	64047514	64048926	MSTRG.70416.1	1	1413	MSTRG.70416	.	2.40858	3.06744	1.79791	0.0001	0.396429	0.0001	18.3394	4.19687	0.0379795	0.781251	up	yes
157700	i	chr4.4	.	6043634	6044119	MSTRG.83129.1	1	486	MSTRG.83129	MS.gene030383	4.83671	0.0001	1.71695	0.0001	0.0001	0.0001	21845.9	14.4151	0.0380462	0.781754	up	yes
153370	u	chr4.3	.	50308926	50309138	MSTRG.80878.1	1	213	MSTRG.80878	.	0.0001	0.0001	0.0001	3.76256	0.460057	4.26917	3.53283e-05	-14.7888	0.0380589	0.781754	down	yes
61531	i	chr2.2	.	10362878	10363148	MSTRG.32359.1	1	271	MSTRG.32359	MS.gene043339	0.0001	0.0001	0.0001	6.58563	0.0001	4.18273	2.78591e-05	-15.1315	0.0380831	0.781754	down	yes
20925	u	chr1.1	.	81138377	81138599	MSTRG.10900.1	1	223	MSTRG.10900	.	10.7852	0.0001	3.51815	0.0001	0.0001	0.0001	47678.2	15.541	0.0381318	0.782088	up	yes
74484	u	chr2.3	.	62526882	62527103	MSTRG.39101.1	1	222	MSTRG.39101	.	0.0001	0.0001	0.0001	5.40592	0.0001	7.48278	2.3276e-05	-15.3908	0.0384061	0.78417	down	yes
125373	u	chr3.4	-	97613806	97614842	MSTRG.65982.1	2	862	MSTRG.65982	.	0.0001	0.0001	0.0001	0.962389	0.0001	2.35196	9.05127e-05	-13.4315	0.0384268	0.78433	down	yes
132269	u	chr4.1	.	46510881	46511331	MSTRG.69784.1	1	451	MSTRG.69784	.	1.03727	0.0001	1.11463	17.2129	6.46901	4.25575	0.0770284	-3.69847	0.0385324	0.785393	down	yes
211421	u	chr6.2	.	47765298	47765595	MSTRG.111190.1	1	298	MSTRG.111190	.	0.0001	0.0001	0.0001	4.41962	6.24549	0.0001	2.81289e-05	-15.1176	0.0385448	0.785393	down	yes
243380	i	chr7.2	.	81066262	81066537	MSTRG.128241.1	1	276	MSTRG.128241	MS.gene44724	4.25679	0.0001	6.46131	0.0001	0.0001	0.0001	35727.3	15.1247	0.0385551	0.785393	up	yes
182671	u	chr5.2	.	69357287	69357570	MSTRG.96126.1	1	284	MSTRG.96126	.	0.0001	0.0001	0.0001	0.0001	4.29468	6.26033	2.84222e-05	-15.1026	0.0386095	0.786001	down	yes
183123	u	chr5.2	.	72797989	72798455	MSTRG.96332.1	1	467	MSTRG.96332	.	0.0001	0.0001	0.0001	0.0001	4.20009	2.35802	4.57442e-05	-14.4161	0.0386384	0.786248	down	yes
211089	u	chr6.2	.	41247609	41247870	MSTRG.110953.1	1	262	MSTRG.110953	.	0.0001	0.0001	0.0001	3.07307	3.57835	0.326625	4.2992e-05	-14.5056	0.0387226	0.787363	down	yes
181569	i	chr5.2	.	58636934	58637842	MSTRG.95566.1	1	909	MSTRG.95566	MS.gene44843	0.14863	0.0001	0.293419	0.704204	7.25791	0.892379	0.049935	-4.32381	0.0387727	0.787719	down	yes
267372	j	chr8.1	+	30271413	30272992	MSTRG.140918.2	3	267	MSTRG.140918	MS.gene76402	0.0001	3.21408	7.39947	0.0001	0.0001	0.0001	35378.8	15.1106	0.0387941	0.787744	up	yes
189307	u	chr5.3	-	47940522	47948562	MSTRG.99570.1	2	449	MSTRG.99570	.	3.15459	12.1888	10.0299	1.12174	0.447171	1.47895	8.32493	3.05744	0.0388317	0.788295	up	yes
190704	x	chr5.3	-	61177037	61198157	MSTRG.100286.1	2	749	MSTRG.100286	MS.gene009607	5.73419	2.49832	1.88025	9.03379	40.4379	9.61979	0.171137	-2.54677	0.0388851	0.788693	down	yes
6131	u	41640	.	17617	18136	MSTRG.3365.1	1	520	MSTRG.3365	.	8.8309	7.52045	2.69146	1.01371	0.893583	0.240354	8.8668	3.14841	0.0389081	0.788728	up	yes
65238	u	chr2.2	.	52988546	52988903	MSTRG.34281.1	1	358	MSTRG.34281	.	5.09223	3.90266	6.10813	0.722875	0.248484	0.0001	15.5467	3.95854	0.0389121	0.788728	up	yes
106637	u	chr3.3	-	15520854	15521473	MSTRG.56081.1	2	513	MSTRG.56081	.	2.11792	3.93099	0.0001	0.0001	0.0001	0.0001	20163.4	14.2994	0.038962	0.789225	up	yes
152805	j	chr4.3	-	43681474	43682446	MSTRG.80598.2	3	726	MSTRG.80598	MS.gene09177	0.0001	0.0001	0.0001	2.99236	1.36981	0.0001	6.87715e-05	-13.8278	0.039022	0.789927	down	yes
134810	u	chr4.1	+	78332438	78332843	MSTRG.71112.2	2	317	MSTRG.71112	.	2.76596	2.67009	0.270018	0.0001	0.0001	0.0001	19020.2	14.2152	0.0391435	0.791872	up	yes
28506	i	chr1.2	-	65482241	65482878	MSTRG.14885.1	1	638	MSTRG.14885	MS.gene20801	0.0001	0.005526	0.0001	2.56559	4.07992	0.0001	0.000861622	-10.1807	0.0392115	0.792733	down	yes
268212	x	chr8.1	+	36723864	36736950	MSTRG.141332.1	2	1722	MSTRG.141332	MS.gene90766	0.831069	0.0001	0.2144	8.78962	1.12042	2.39581	0.0849653	-3.55698	0.0393517	0.794295	down	yes
132552	u	chr4.1	-	49910922	49923162	MSTRG.69956.1	2	325	MSTRG.69956	.	0.926275	0.0001	0.0001	6.21685	5.82072	6.52877	0.0499008	-4.32479	0.0393652	0.794295	down	yes
85850	i	chr3.1	.	9434031	9434275	MSTRG.45086.1	1	245	MSTRG.45086	MS.gene039608	0.0001	0.0001	0.0001	5.94299	0.0001	5.50644	2.62019e-05	-15.22	0.0394738	0.7958	down	yes
63434	i	chr2.2	.	28348242	28348520	MSTRG.33372.1	1	279	MSTRG.33372	MS.gene066745	0.0001	0.0001	0.0001	7.38063	3.77755	0.0001	2.68859e-05	-15.1828	0.0395497	0.796051	down	yes
239447	u	chr7.2	.	31707940	31708879	MSTRG.126133.1	1	940	MSTRG.126133	.	0.0001	0.0001	0.09609	3.42531	2.87012	0.0001	0.015295	-6.0308	0.0395571	0.796051	down	yes
269534	u	chr8.1	+	51531229	51533127	MSTRG.142020.1	2	219	MSTRG.142020	.	0.0001	9.10991	4.2	0.0001	0.0001	0.0001	44366.7	15.4372	0.0395629	0.796051	up	yes
170637	u	chr5.1	.	27556962	27557301	MSTRG.89929.1	1	340	MSTRG.89929	.	0.0001	0.0001	0.0001	0.221089	2.3057	2.64173	5.80438e-05	-14.0725	0.0396883	0.797716	down	yes
93062	u	chr3.1	.	77507083	77507577	MSTRG.48889.1	1	495	MSTRG.48889	.	3.15953	2.99422	0.0001	0.0001	0.0001	0.0001	20512.8	14.3242	0.0398234	0.799412	up	yes
42781	u	chr1.4	.	9525246	9526545	MSTRG.22646.1	1	1300	MSTRG.22646	.	1.92928	0.392239	0.68753	6.12985	6.39159	6.18673	0.160842	-2.63629	0.0399683	0.800396	down	yes
285671	i	chr8.3	.	19586903	19587223	MSTRG.150362.1	1	321	MSTRG.150362	MS.gene71909	0.0001	0.0001	0.0001	6.18613	0.0001	2.84289	3.32258e-05	-14.8773	0.039995	0.800396	down	yes
194493	i	chr5.4	.	10962637	10963558	MSTRG.102245.1	1	922	MSTRG.102245	MS.gene010398	0.88437	0.0001	2.24989	0.0001	0.0001	0.0001	10447.9	13.3509	0.0400089	0.800396	up	yes
67214	u	chr2.2	.	69018601	69019032	MSTRG.35318.1	1	432	MSTRG.35318	.	0.0001	0.0001	0.0001	0.0001	2.04311	4.83994	4.35847e-05	-14.4858	0.0400694	0.800396	down	yes
38647	i	chr1.3	.	61813949	61814839	MSTRG.20325.1	1	891	MSTRG.20325	MS.gene20838	0.0001	0.0001	0.277055	0.929346	1.8759	4.02258	0.0406066	-4.62214	0.0400706	0.800396	down	yes
226305	i	chr7.1	.	2397758	2397971	MSTRG.119262.1	1	214	MSTRG.119262	MS.gene066544	9.46022	24.529	15.9409	2.73784	2.30512	1.42145	7.72384	2.94932	0.0400768	0.800396	up	yes
279174	u	chr8.2	.	48615052	48615495	MSTRG.146952.1	1	444	MSTRG.146952	.	0.0001	0.0001	0.0001	3.23879	0.0001	3.05749	4.76464e-05	-14.3573	0.0401041	0.800396	down	yes
145035	u	chr4.2	.	79101019	79101235	MSTRG.76492.1	1	217	MSTRG.76492	.	0.0001	6.94385	5.99412	0.0001	0.0001	0.0001	43126.9	15.3963	0.040238	0.802383	up	yes
253444	u	chr7.3	-	85260323	85261206	MSTRG.133570.1	1	884	MSTRG.133570	.	0.136069	0.0001	0.0001	1.28496	1.36712	2.08154	0.0287874	-5.11842	0.0403579	0.804088	down	yes
3931	u	32807	.	368363	368663	MSTRG.1743.1	1	301	MSTRG.1743	.	0.0001	4.8657	4.43053	0.0001	0.0001	0.0001	30987.8	14.9194	0.0404515	0.805187	up	yes
87466	i	chr3.1	.	30164242	30164983	MSTRG.45964.1	1	742	MSTRG.45964	MS.gene019054	0.0001	0.0001	0.0001	1.48796	2.63099	0.0001	7.28323e-05	-13.7451	0.04047	0.805187	down	yes
14044	o	chr1.1	+	24642008	24713130	MSTRG.7254.1	3	406	MSTRG.7254	MS.gene84488	2.61965	4.89538	0.0001	0.0001	0.0001	0.0001	25050.4	14.6125	0.0405402	0.80549	up	yes
182280	u	chr5.2	.	65545020	65545437	MSTRG.95842.1	1	418	MSTRG.95842	.	0.0001	4.36265	2.44937	0.0001	0.0001	0.0001	22707.1	14.4709	0.0406983	0.807267	up	yes
143557	u	chr4.2	.	57760179	57760465	MSTRG.75777.1	1	287	MSTRG.75777	.	0.953938	0.838334	0.35921	6.41561	7.16531	8.56874	0.0971339	-3.36388	0.0407823	0.808067	down	yes
77944	u	chr2.4	.	10984222	10984505	MSTRG.40969.1	1	284	MSTRG.40969	.	0.0001	0.0001	0.0001	0.0001	2.75789	7.49763	2.92522e-05	-15.0611	0.0408004	0.808224	down	yes
278493	i	chr8.2	.	39938868	39939600	MSTRG.146591.1	1	733	MSTRG.146591	MS.gene25390	0.443336	0.405022	0.143871	2.48129	5.45365	2.125	0.0986318	-3.3418	0.0408597	0.808675	down	yes
187245	u	chr5.3	+	20315555	20320448	MSTRG.98518.1	2	1367	MSTRG.98518	.	1.50213	0.240694	0.642101	12.3045	4.78755	1.12949	0.130885	-2.93363	0.0408649	0.808675	down	yes
161509	u	chr4.4	.	32111231	32112597	MSTRG.85199.1	1	1367	MSTRG.85199	.	4.7389	0.516693	2.56655	0.25781	0.321646	0.0001	13.4968	3.75454	0.0409552	0.809605	up	yes
166730	u	chr4.4	.	87236681	87236908	MSTRG.87861.1	1	228	MSTRG.87861	.	1.35742	0.0001	0.0001	10.9881	7.66002	7.53346	0.0518539	-4.2694	0.0411977	0.812805	down	yes
1838	u	17250	+	207914	215222	MSTRG.770.1	2	369	MSTRG.770	.	0.0001	4.28678	3.23344	0.0001	0.0001	0.0001	25067.7	14.6135	0.0413279	0.81357	up	yes
144030	i	chr4.2	.	67544810	67545223	MSTRG.76009.1	1	414	MSTRG.76009	MS.gene85052	0.0001	0.0001	0.0001	2.41101	4.99356	0.0001	4.0515e-05	-14.5912	0.0413357	0.81357	down	yes
128499	i	chr4.1	.	17608172	17608631	MSTRG.67695.1	1	460	MSTRG.67695	MS.gene08404	24.2052	11.3617	12.569	39.151	53.0965	151.951	0.197118	-2.34287	0.0413603	0.813646	down	yes
269681	i	chr8.1	+	53400050	53400957	MSTRG.142109.1	2	797	MSTRG.142109	MS.gene007845	0.176237	0.0001	0.0001	7.29676	2.73369	0.0001	0.01759	-5.8291	0.0413973	0.8137	down	yes
218386	u	chr6.3	.	48459015	48459416	MSTRG.114966.1	1	402	MSTRG.114966	.	0.0001	0.0001	0.0001	0.0001	3.95032	3.17792	4.20855e-05	-14.5363	0.0414538	0.814125	down	yes
14807	u	chr1.1	-	33832272	33842905	MSTRG.7637.2	2	480	MSTRG.7637	.	0.0001	0.0001	0.0001	0.0001	2.58867	3.41279	4.9987e-05	-14.2881	0.0414649	0.814173	down	yes
167012	u	chr4.4	.	89692584	89693371	MSTRG.88016.1	1	788	MSTRG.88016	.	0.0001	0.0001	0.0001	1.60068	2.20916	0.0001	7.87414e-05	-13.6325	0.0417083	0.816003	down	yes
49376	u	chr1.4	.	73306418	73306721	MSTRG.26027.1	1	304	MSTRG.26027	.	0.0001	3.56769	5.34421	0.0001	0.0001	0.0001	29706.7	14.8585	0.0417152	0.816003	up	yes
97247	u	chr3.2	.	21223267	21223689	MSTRG.51174.1	1	423	MSTRG.51174	.	4.79728	3.7911	1.0658	0.274274	0.0001	0.0001	35.1734	5.13641	0.0417581	0.816672	up	yes
260471	u	chr7.4	.	54551373	54551576	MSTRG.137202.1	1	204	MSTRG.137202	.	0.0001	0.0001	0.0001	0.0001	10.4315	3.99749	2.07913e-05	-15.5537	0.0418215	0.817569	down	yes
67246	u	chr2.2	+	69131188	69131538	MSTRG.35338.1	2	330	MSTRG.35338	.	5.65596	3.51386	0.0001	0.0001	0.0001	0.0001	30566.4	14.8997	0.0418709	0.818193	up	yes
291032	u	chr8.3	.	70615166	70616002	MSTRG.153177.1	1	837	MSTRG.153177	.	0.0001	0.0001	0.0001	1.76968	0.0001	1.45372	9.30668e-05	-13.3914	0.0419286	0.818791	down	yes
234517	i	chr7.1	.	85279211	85279607	MSTRG.123566.1	1	397	MSTRG.123566	MS.gene91524	0.0001	3.35678	3.41019	0.0001	0.0001	0.0001	22556.9	14.4613	0.0419365	0.818791	up	yes
56089	u	chr2.1	.	42233412	42233666	MSTRG.29517.1	1	255	MSTRG.29517	.	0.0001	5.42719	5.19638	0.0001	0.0001	0.0001	35412.2	15.112	0.0420312	0.819954	up	yes
202620	i	chr6.1	.	10855605	10855997	MSTRG.106472.1	1	393	MSTRG.106472	MS.gene87958	0.477048	5.68585	4.05879	0.0001	0.0001	0.22324	45.7469	5.5156	0.0421562	0.82138	up	yes
4953	u	39996	+	8915	10073	MSTRG.2285.1	2	211	MSTRG.2285	.	0.0001	0.0001	0.0001	0.0001	6.13295	7.39574	2.21749e-05	-15.4607	0.0421991	0.821796	down	yes
203704	u	chr6.1	.	27160440	27160686	MSTRG.106963.1	1	247	MSTRG.106963	.	0.0001	0.0001	0.0001	0.0001	5.12653	6.23484	2.6405e-05	-15.2088	0.0422047	0.821796	down	yes
241599	u	chr7.2	.	57027472	57028646	MSTRG.127312.1	1	1175	MSTRG.127312	.	0.0001	0.093785	0.0001	2.7162	2.10047	0.0001	0.0195121	-5.67949	0.0422484	0.822133	down	yes
208533	u	chr6.2	.	9109855	9110385	MSTRG.109648.1	1	531	MSTRG.109648	.	0.0001	0.0001	0.0001	0.0001	1.89451	3.42837	5.63594e-05	-14.115	0.0423051	0.823067	down	yes
175924	u	chr5.2	.	1155884	1157031	MSTRG.92640.1	1	1148	MSTRG.92640	.	3.63741	20.6547	29.1623	0.037514	1.85792	4.59382	8.23737	3.04218	0.0424045	0.824645	up	yes
260797	u	chr7.4	.	60211685	60212103	MSTRG.137390.1	1	419	MSTRG.137390	.	5.16433	0.0001	1.87695	0.0001	0.0001	0.0001	23471.3	14.5186	0.0424127	0.824645	up	yes
253231	u	chr7.3	.	83045424	83046306	MSTRG.133428.1	1	883	MSTRG.133428	.	0.0001	0.0001	0.0001	0.0001	2.02355	1.20081	9.30389e-05	-13.3918	0.0424626	0.825119	down	yes
19566	i	chr1.1	.	72505075	72505501	MSTRG.10153.1	1	427	MSTRG.10153	MS.gene006300	0.0001	0.249449	0.936949	12.1355	3.50501	3.66173	0.0614695	-4.02399	0.0424891	0.825272	down	yes
149146	u	chr4.3	.	17381805	17382687	MSTRG.78669.1	1	883	MSTRG.78669	.	1.32768	0.0001	1.83838	0.0001	0.0001	0.0001	10553.9	13.3655	0.0425091	0.825317	up	yes
221317	u	chr6.4	.	209286	209966	MSTRG.116601.1	1	681	MSTRG.116601	.	3.1051	1.30097	0.0001	0.0001	0.0001	0.0001	14687.2	13.8423	0.0425566	0.825897	up	yes
20739	i	chr1.1	.	80068813	80069231	MSTRG.10799.1	1	419	MSTRG.10799	MS.gene037313	0.0001	0.0001	0.0001	3.11714	0.0001	3.26695	4.6991e-05	-14.3773	0.0426221	0.82648	down	yes
128749	u	chr4.1	.	19209956	19210219	MSTRG.67838.1	1	264	MSTRG.67838	.	0.0001	0.0001	0.0001	5.50934	0.0001	4.64094	2.95555e-05	-15.0462	0.0426308	0.82648	down	yes
217884	u	chr6.3	.	39968780	39969045	MSTRG.114627.1	1	266	MSTRG.114627	.	11.0107	54.521	52.0088	95.027	177.63	371.847	0.182374	-2.45503	0.0426413	0.826511	down	yes
176521	i	chr5.2	.	5059571	5060044	MSTRG.92949.1	1	474	MSTRG.92949	MS.gene015412	0.0001	2.99619	2.68498	0.0001	0.0001	0.0001	18937.6	14.209	0.0427052	0.827064	up	yes
46879	u	chr1.4	.	54543291	54543591	MSTRG.24730.1	1	301	MSTRG.24730	.	5.86079	6.66746	7.74872	1.03276	0.0001	0.0001	19.63	4.29499	0.0427718	0.827818	up	yes
247233	i	chr7.3	.	18764214	18764547	MSTRG.130254.1	1	334	MSTRG.130254	MS.gene017788	6.52821	2.4947	0.0001	0.0001	0.0001	0.0001	30076.7	14.8764	0.0428205	0.827818	up	yes
135770	u	chr4.1	.	87939315	87939923	MSTRG.71612.1	1	609	MSTRG.71612	.	3.58115	1.36509	0.0001	0.0001	0.0001	0.0001	16487.8	14.0091	0.0428212	0.827818	up	yes
270565	i	chr8.1	.	63293955	63294528	MSTRG.142526.1	1	574	MSTRG.142526	MS.gene063816	0.0001	0.0001	0.0001	0.0001	2.59588	2.32244	6.09952e-05	-14.0009	0.0428238	0.827818	down	yes
188157	u	chr5.3	.	28396070	28396550	MSTRG.98999.1	1	481	MSTRG.98999	.	0.0001	2.57409	6.41626	0.114767	0.0001	0.0001	78.2003	6.2891	0.0428577	0.827914	up	yes
12912	u	chr1.1	.	13613852	13614466	MSTRG.6645.1	1	615	MSTRG.6645	.	0.0001	0.0001	0.0001	0.0001	2.53187	2.09306	6.48644e-05	-13.9122	0.0428621	0.827914	down	yes
120626	o	chr3.4	-	63991916	64084467	MSTRG.63409.2	2	216	MSTRG.63409	MS.gene38403	0.193986	18.887	5.21232	0.0001	0.692004	0.0001	35.0956	5.13322	0.0428731	0.827914	up	yes
217338	u	chr6.3	.	30339786	30340076	MSTRG.114422.1	1	291	MSTRG.114422	.	0.0001	0.0001	0.0001	0.0001	4.75301	4.87942	3.11445e-05	-14.9707	0.0429005	0.828106	down	yes
195659	u	chr5.4	.	19545420	19545622	MSTRG.102851.1	1	203	MSTRG.102851	.	0.0001	0.0001	0.512507	0.0001	5.00522	22.1955	0.018849	-5.72937	0.042924	0.828385	down	yes
206535	u	chr6.1	.	71100934	71101206	MSTRG.108522.1	1	273	MSTRG.108522	.	0.0001	0.0001	0.0001	0.0001	5.86914	4.49782	2.89378e-05	-15.0767	0.043006	0.828863	down	yes
174520	u	chr5.1	.	70874635	70875354	MSTRG.91887.1	1	720	MSTRG.91887	.	0.0001	3.75674	2.40711	0.057639	0.0001	0.0001	106.571	6.73567	0.0430539	0.828863	up	yes
116060	u	chr3.4	+	6130099	6130656	MSTRG.61078.1	1	558	MSTRG.61078	.	5.15285	17.0965	3.05354	1.40537	0.871091	0.0001	11.1145	3.47437	0.0430915	0.828863	up	yes
26285	u	chr1.2	+	49436941	49461082	MSTRG.13772.4	4	2837	MSTRG.13772	.	0.570837	0.378766	0.625055	0.0001	0.053621	0.0001	29.2573	4.87073	0.0431736	0.829777	up	yes
155275	u	chr4.3	.	75858811	75859069	MSTRG.81816.1	1	259	MSTRG.81816	.	0.0001	0.0001	0.0001	4.34593	6.90686	0.0001	2.66598e-05	-15.195	0.0433129	0.831086	down	yes
200434	o	chr5.4	-	70386291	70392203	MSTRG.105347.1	2	294	MSTRG.105347	MS.gene038185	21316.4	1248.63	1318.95	1145.91	783.282	1630.62	6.70933	2.74617	0.0433772	0.831693	up	yes
86900	u	chr3.1	.	21745586	21745790	MSTRG.45631.1	1	205	MSTRG.45631	.	0.0001	0.0001	0.0001	0.0001	8.41773	5.20576	2.20206e-05	-15.4708	0.0433896	0.831693	down	yes
71585	j	chr2.3	+	30659248	30660533	MSTRG.37631.2	2	213	MSTRG.37631	MS.gene045715	0.0001	0.0001	0.0001	0.0001	8.5781	4.66442	2.26541e-05	-15.4299	0.0434284	0.831767	down	yes
6206	u	41791	.	45865	46196	MSTRG.3399.1	1	332	MSTRG.3399	.	0.0001	2.84004	5.08087	0.0001	0.0001	0.0001	26403.4	14.6884	0.0434992	0.83227	up	yes
222053	u	chr6.4	.	10126699	10127113	MSTRG.116960.1	1	415	MSTRG.116960	.	0.0001	3.22359	3.12497	0.0001	0.0001	0.0001	21162.2	14.3692	0.0435642	0.833172	up	yes
77704	u	chr2.4	.	9090288	9090519	MSTRG.40856.1	1	232	MSTRG.40856	.	0.0001	0.0001	0.0001	0.0001	5.06856	6.89058	2.50852e-05	-15.2828	0.0435756	0.83322	down	yes
258538	u	chr7.4	.	31648062	31648288	MSTRG.136186.1	1	227	MSTRG.136186	.	0.0001	5.49761	5.99672	0.0001	0.0001	0.0001	38314.8	15.2256	0.0437262	0.834944	up	yes
237225	u	chr7.2	.	15496849	15497824	MSTRG.124945.1	1	976	MSTRG.124945	.	9.56167	0.925218	1.45586	0.611116	0.0001	0.0001	19.5361	4.28807	0.0437282	0.834944	up	yes
149240	u	chr4.3	.	17958799	17959045	MSTRG.78727.1	1	247	MSTRG.78727	.	0.0001	0.0001	0.0001	6.32363	5.34318	0.0001	2.57137e-05	-15.2471	0.0438207	0.835686	down	yes
135779	u	chr4.1	.	88059826	88060645	MSTRG.71616.1	1	820	MSTRG.71616	.	1.98658	1.53334	0.0001	0.0001	0.0001	0.0001	11733.4	13.5183	0.043844	0.83596	up	yes
191558	u	chr5.3	.	69574625	69575203	MSTRG.100703.1	1	579	MSTRG.100703	.	1.54139	3.56608	0.0001	0.0001	0.0001	0.0001	17025.2	14.0554	0.0438696	0.836046	up	yes
169694	u	chr5.1	.	18940935	18941236	MSTRG.89444.1	1	302	MSTRG.89444	.	0.0001	0.0001	0.0001	6.93313	2.91109	0.0001	3.04744e-05	-15.002	0.043878	0.836046	down	yes
90486	j	chr3.1	-	59468377	59468990	MSTRG.47501.1	2	482	MSTRG.47501	MS.gene039951	0.0001	0.0001	0.0001	0.0001	3.1548	2.54833	5.26017e-05	-14.2145	0.0438843	0.836046	down	yes
19285	i	chr1.1	.	70906210	70906906	MSTRG.10005.1	1	697	MSTRG.10005	MS.gene88920	0.0001	1.47734	2.26411	0.0001	0.0001	0.0001	12471.8	13.6064	0.0439176	0.836078	up	yes
76212	u	chr2.3	.	74986818	74987396	MSTRG.40038.1	1	579	MSTRG.40038	.	0.0001	1.78744	2.75208	0.0001	0.0001	0.0001	15132.1	13.8853	0.0439266	0.836078	up	yes
212355	u	chr6.2	.	67146265	67146698	MSTRG.111660.1	1	434	MSTRG.111660	.	0.0001	4.01818	2.1564	0.0001	0.0001	0.0001	20582.3	14.3291	0.0439519	0.836141	up	yes
93761	i	chr3.1	.	82255946	82256852	MSTRG.49271.1	1	907	MSTRG.49271	MS.gene32823	0.241482	0.0001	0.0001	1.83821	1.97154	1.55933	0.0450138	-4.47349	0.0441374	0.838136	down	yes
269320	u	chr8.1	-	47591403	47592982	MSTRG.141896.1	3	404	MSTRG.141896	.	2.43815	4.65127	0.0001	0.0001	0.0001	0.0001	23631.7	14.5284	0.0442107	0.839187	up	yes
203010	u	chr6.1	.	15640831	15641052	MSTRG.106687.1	1	222	MSTRG.106687	.	0.0001	0.0001	1.1322	2.6771	10.4012	15.9503	0.0390098	-4.68002	0.0442657	0.83972	down	yes
252819	u	chr7.3	.	78877799	78878560	MSTRG.133211.1	1	762	MSTRG.133211	.	0.0001	0.801273	0.0001	7.49833	3.23533	2.74414	0.0594662	-4.07179	0.0443017	0.840061	down	yes
71462	u	chr2.3	.	29407921	29408471	MSTRG.37568.1	1	551	MSTRG.37568	.	0.0001	0.0001	0.0001	3.54528	1.7406	0.0001	5.67539e-05	-14.1049	0.0443653	0.840925	down	yes
285591	u	chr8.3	.	19133555	19133987	MSTRG.150315.1	1	433	MSTRG.150315	.	0.0001	0.0001	0.0001	0.0001	3.18011	3.14887	4.74003e-05	-14.3647	0.0443887	0.8412	down	yes
238315	u	chr7.2	.	23021090	23021644	MSTRG.125544.1	1	555	MSTRG.125544	.	0.0001	21.6275	26.527	1.79037	0.0001	0.0001	26.8934	4.74918	0.0445347	0.842771	up	yes
44894	u	chr1.4	.	30690184	30691021	MSTRG.23759.1	1	838	MSTRG.23759	.	0.0001	0.0001	0.0001	0.0001	1.97298	1.33098	9.07974e-05	-13.427	0.0445614	0.843106	down	yes
282976	i	chr8.3	.	525431	526040	MSTRG.148889.1	1	610	MSTRG.148889	MS.gene042082	0.0001	1.7867	2.46027	0.0001	0.0001	0.0001	14156.9	13.7892	0.044603	0.843225	up	yes
227323	u	chr7.1	.	8551417	8551815	MSTRG.119777.1	1	399	MSTRG.119777	.	0.0001	0.0001	0.0001	0.0001	2.21557	4.6689	4.35756e-05	-14.4861	0.0446747	0.844053	down	yes
75963	u	chr2.3	+	73185882	73188841	MSTRG.39907.1	1	2960	MSTRG.39907	.	0.156434	0.263696	0.163392	0.259443	3.55244	0.958841	0.122313	-3.03135	0.0447228	0.84462	down	yes
251939	j	chr7.3	-	69017778	69019771	MSTRG.132800.2	4	502	MSTRG.132800	MS.gene62562	2.83465	2.85262	0.0001	0.0001	0.0001	0.0001	18957.9	14.2105	0.0447725	0.844876	up	yes
178164	u	chr5.2	.	17757133	17757385	MSTRG.93802.1	1	253	MSTRG.93802	.	0.0001	0.0001	0.0001	3.81917	0.0001	6.50055	2.90703e-05	-15.0701	0.0448019	0.845261	down	yes
143386	u	chr4.2	.	55321844	55322213	MSTRG.75685.1	1	370	MSTRG.75685	.	0.0001	0.0001	0.0001	2.71635	0.0001	4.19425	4.3411e-05	-14.4916	0.0448642	0.845395	down	yes
301129	u	chr8.4	.	77927997	77928568	MSTRG.158407.1	1	572	MSTRG.158407	.	0.0001	1.78026	2.76715	0.0001	0.0001	0.0001	15158.4	13.8878	0.0448908	0.845395	up	yes
172851	u	chr5.1	-	55731910	55733079	MSTRG.91180.3	2	753	MSTRG.91180	.	7.15253	3.30872	4.71985	0.819848	0.581457	0.0001	10.8328	3.43733	0.0450164	0.847256	up	yes
225965	u	chr7.1	-	340948	341764	MSTRG.119089.1	2	332	MSTRG.119089	.	0.0001	0.0001	0.0001	0.0001	5.35051	2.91892	3.62778e-05	-14.7506	0.0450719	0.847749	down	yes
216927	u	chr6.3	.	24548493	24549054	MSTRG.114222.1	1	562	MSTRG.114222	.	0.0001	0.0001	0.0001	0.0001	1.72385	3.10043	6.21843e-05	-13.9731	0.0450789	0.847749	down	yes
26130	i	chr1.2	.	48111033	48111634	MSTRG.13627.1	1	602	MSTRG.13627	MS.gene029768	0.0001	0.0001	0.0001	2.49882	0.0001	1.83619	6.92025e-05	-13.8188	0.0451033	0.848037	down	yes
271405	u	chr8.1	.	71899827	71900181	MSTRG.142948.1	1	355	MSTRG.142948	.	0.0001	0.0001	0.0001	0.0001	2.62037	5.0402	3.91611e-05	-14.6402	0.0452281	0.84953	down	yes
62591	u	chr2.2	+	19492934	19493933	MSTRG.32938.2	3	234	MSTRG.32938	.	0.0001	0.0001	0.0001	6.50987	5.69202	0.0001	2.45862e-05	-15.3118	0.0452421	0.849595	down	yes
71749	u	chr2.3	.	32475886	32476290	MSTRG.37704.1	1	405	MSTRG.37704	.	0.0001	3.48007	2.96353	0.0001	0.0001	0.0001	21479	14.3906	0.0452497	0.849595	up	yes
45435	i	chr1.4	.	37322541	37323011	MSTRG.24021.1	1	471	MSTRG.24021	MS.gene068159	0.0001	0.0001	0.0001	0.0001	3.12077	2.61211	5.23288e-05	-14.222	0.0452797	0.849817	down	yes
125674	u	chr3.4	.	99690026	99690265	MSTRG.66149.1	1	240	MSTRG.66149	.	0.0001	0.0001	0.0001	0.0001	5.01051	6.0811	2.70472e-05	-15.1742	0.0453249	0.850126	down	yes
92934	u	chr3.1	+	76565497	76566392	MSTRG.48818.2	4	629	MSTRG.48818	.	0.0001	2.28402	1.84591	0.0001	0.0001	0.0001	13766.8	13.7489	0.0453725	0.850126	up	yes
169342	u	chr5.1	.	15821803	15822041	MSTRG.89231.1	1	239	MSTRG.89231	.	0.0001	0.0001	0.0001	0.0001	7.78726	3.81828	2.58495e-05	-15.2395	0.0453942	0.850126	down	yes
155979	u	chr4.3	.	83467448	83467959	MSTRG.82205.1	1	512	MSTRG.82205	.	0.0001	0.0001	0.0001	2.82712	0.0001	2.20548	5.96102e-05	-14.0341	0.0454122	0.850126	down	yes
5839	u	41220	.	17422	17795	MSTRG.3096.1	1	374	MSTRG.3096	.	12.287	2.61721	1.08553	159.244	2.01247	2.99475	0.0973495	-3.36068	0.0454336	0.850126	down	yes
212009	u	chr6.2	.	59976682	59976913	MSTRG.111484.1	1	232	MSTRG.111484	.	6.60592	5.50042	0.0001	0.0001	0.0001	0.0001	40354.8	15.3005	0.0454507	0.850126	up	yes
239235	j	chr7.2	+	29990035	29992227	MSTRG.126039.1	3	521	MSTRG.126039	MS.gene27610	0.0001	0.0001	0.0001	3.27301	2.14649	0.0001	5.53547e-05	-14.1409	0.0454927	0.85057	down	yes
65633	u	chr2.2	.	56660689	56661070	MSTRG.34463.1	1	382	MSTRG.34463	.	0.0001	0.0001	0.0001	3.08529	4.35181	0.0001	4.03378e-05	-14.5975	0.0455046	0.850622	down	yes
232637	u	chr7.1	.	61873102	61873368	MSTRG.122582.1	1	267	MSTRG.122582	.	0.0001	6.67572	3.31122	0.0001	0.0001	0.0001	33290.1	15.0228	0.0456238	0.851841	up	yes
21131	i	chr1.1	.	82299723	82300186	MSTRG.11003.1	1	464	MSTRG.11003	MS.gene74260	3.70466	2.43152	0.0001	0.0001	0.0001	0.0001	20454.3	14.3201	0.0456846	0.851841	up	yes
198273	i	chr5.4	+	51513158	51514344	MSTRG.104215.1	1	1187	MSTRG.104215	MS.gene050015	0.907554	0.582636	2.00078	2.37727	8.14859	11.4436	0.158901	-2.6538	0.0456891	0.851841	down	yes
204710	u	chr6.1	-	46925849	46929872	MSTRG.107498.1	3	1191	MSTRG.107498	.	1.3442	2.64715	2.32541	0.0001	0.341515	0.0001	18.4854	4.20832	0.0456936	0.851841	up	yes
174330	u	chr5.1	.	69324956	69325653	MSTRG.91792.1	1	698	MSTRG.91792	.	0.0001	0.0001	0.0001	1.41666	0.0001	2.2246	8.23868e-05	-13.5672	0.0457949	0.853151	down	yes
9964	u	57544	.	10175	10435	MSTRG.5176.1	1	261	MSTRG.5176	.	0.0001	0.0001	0.0001	0.0001	6.79891	3.53914	2.90187e-05	-15.0727	0.0458968	0.854368	down	yes
284390	u	chr8.3	.	10790006	10790762	MSTRG.149652.1	1	757	MSTRG.149652	.	0.0001	1.66782	1.69344	0.0001	0.0001	0.0001	11204.5	13.4518	0.0460495	0.8557	up	yes
84003	u	chr2.4	.	70766718	70767340	MSTRG.44041.1	1	623	MSTRG.44041	.	0.0001	0.617736	0.0001	5.37961	1.31366	5.00024	0.0528444	-4.24211	0.0462118	0.857854	down	yes
238780	i	chr7.2	.	26354626	26354927	MSTRG.125814.1	1	302	MSTRG.125814	MS.gene85472	5.39993	0.0001	3.52956	0.0001	0.0001	0.0001	29765.3	14.8613	0.0462118	0.857854	up	yes
75799	i	chr2.3	.	72059903	72060370	MSTRG.39819.1	1	468	MSTRG.39819	MS.gene002357	3.25616	2.71976	0.0001	0.0001	0.0001	0.0001	19920.1	14.2819	0.0462125	0.857854	up	yes
101478	i	chr3.2	.	69729118	69729742	MSTRG.53363.1	1	625	MSTRG.53363	MS.gene25882	2.01169	2.41675	0.0001	0.0001	0.0001	0.0001	14761.8	13.8496	0.0462703	0.858756	up	yes
252823	u	chr7.3	.	78942881	78943292	MSTRG.133219.1	1	412	MSTRG.133219	.	0.0001	0.0001	0.0001	4.08427	2.76811	0.0001	4.37798e-05	-14.4794	0.0462977	0.858859	down	yes
272580	u	chr8.1	+	82274338	82277744	MSTRG.143568.1	2	335	MSTRG.143568	.	0.0001	0.0001	0.0001	3.49587	4.87316	0.0001	3.5846e-05	-14.7678	0.0463028	0.858859	down	yes
50432	u	chr1.4	.	80814392	80814743	MSTRG.26597.1	1	352	MSTRG.26597	.	2.54302	5.37648	0.0001	0.0001	0.0001	0.0001	26398.7	14.6882	0.0463034	0.858859	up	yes
166050	u	chr4.4	.	80991453	80991885	MSTRG.87523.1	1	433	MSTRG.87523	.	0.0001	0.0001	0.0001	2.85134	3.572	0.0001	4.67039e-05	-14.3861	0.0465002	0.861655	down	yes
62136	u	chr2.2	-	14980333	14982153	MSTRG.32696.1	2	701	MSTRG.32696	.	4.21524	5.86431	2.02375	0.0001	0.0001	0.640963	18.8771	4.23857	0.0466291	0.863701	up	yes
156290	u	chr4.3	.	85739661	85740054	MSTRG.82404.1	1	394	MSTRG.82404	.	3.023	2.89006	1.85441	0.149848	0.0001	0.0001	51.7666	5.69395	0.0466711	0.864307	up	yes
210817	u	chr6.2	.	36718095	36718360	MSTRG.110838.1	1	266	MSTRG.110838	.	0.0001	0.0001	0.0001	3.52802	0.0001	5.96387	3.16056e-05	-14.9495	0.0467168	0.864468	down	yes
196795	u	chr5.4	+	29715227	29718232	MSTRG.103458.1	3	550	MSTRG.103458	.	15.7797	2.15272	0.0001	0.460519	0.0001	0.0001	38.9229	5.28255	0.0467759	0.864879	up	yes
166103	u	chr4.4	.	81476312	81476543	MSTRG.87554.1	1	232	MSTRG.87554	.	5.55667	0.0001	5.89704	0.0001	0.0001	0.0001	38179.4	15.2205	0.0469976	0.868118	up	yes
199576	i	chr5.4	.	63367826	63368231	MSTRG.104907.1	1	406	MSTRG.104907	MS.gene50119	0.0001	3.98696	2.28706	0.0001	0.0001	0.0001	20913.7	14.3522	0.0471168	0.869127	up	yes
244983	j	chr7.3	+	3107996	3108795	MSTRG.129104.1	3	351	MSTRG.129104	MS.gene072450	3.67519	4.23662	0.0001	0.0001	0.0001	0.0001	26373	14.6868	0.0471198	0.869127	up	yes
25255	u	chr1.2	+	37774317	37774742	MSTRG.13227.1	1	426	MSTRG.13227	.	0.0001	0.0001	0.0001	0.0001	3.60052	2.65325	4.79703e-05	-14.3475	0.0471218	0.869127	down	yes
248322	i	chr7.3	+	26419186	26419868	MSTRG.130877.1	2	438	MSTRG.130877	MS.gene065444	0.0001	3.42182	2.42094	0.0001	0.0001	0.0001	19476.2	14.2494	0.0471665	0.869692	up	yes
281797	u	chr8.2	.	75917587	75918499	MSTRG.148291.1	1	913	MSTRG.148291	.	0.0001	1.31235	1.41794	0.0001	0.0001	0.0001	9101.29	13.1519	0.0471919	0.869989	up	yes
279387	u	chr8.2	+	51224125	51227402	MSTRG.147064.1	5	733	MSTRG.147064	.	0.423037	0.0001	0.0001	1.14818	3.22175	3.35031	0.0548217	-4.18911	0.0473218	0.870796	down	yes
18028	i	chr1.1	.	63217412	63217972	MSTRG.9300.1	1	561	MSTRG.9300	MS.gene005389	3.13855	0.0001	1.64814	0.0001	0.0001	0.0001	15956	13.9618	0.0473461	0.870796	up	yes
69851	i	chr2.3	.	13463754	13464358	MSTRG.36746.1	1	605	MSTRG.36746	MS.gene91277	0.0001	0.0001	0.0001	0.0001	2.43358	1.89528	6.93007e-05	-13.8168	0.0473474	0.870796	down	yes
25485	i	chr1.2	.	41531323	41531929	MSTRG.13339.1	1	607	MSTRG.13339	MS.gene98990	2.47973	0.514608	0.312803	3.22562	11.154	9.80533	0.136744	-2.87045	0.0474143	0.871469	down	yes
8142	u	50872	.	66595	67005	MSTRG.4336.1	1	411	MSTRG.4336	.	0.0001	0.0001	0.0001	0.0001	2.39286	4.02692	4.67298e-05	-14.3853	0.0474527	0.871565	down	yes
172772	u	chr5.1	.	54755449	54755953	MSTRG.90984.1	1	505	MSTRG.90984	.	6.07039	0.0001	0.0001	21.3184	26.3927	30.4225	0.0776949	-3.68604	0.0475843	0.87361	down	yes
8155	u	50873	.	39139	39518	MSTRG.4341.1	1	380	MSTRG.4341	.	4.46825	2.75332	0.0001	0.0001	0.0001	0.0001	24072.2	14.5551	0.047768	0.87629	up	yes
211819	i	chr6.2	.	55783639	55784307	MSTRG.111379.1	1	669	MSTRG.111379	MS.gene38652	0.0001	0.0001	0.0001	1.24944	0.0001	2.42503	8.16421e-05	-13.5803	0.0478695	0.877307	down	yes
55093	u	chr2.1	.	29032227	29034594	MSTRG.29021.1	1	2368	MSTRG.29021	.	2.64963	1.5201	4.60519	0.832348	0.49218	0.120613	6.07202	2.60218	0.0480179	0.878978	up	yes
111087	i	chr3.3	.	66839243	66839881	MSTRG.58487.1	1	639	MSTRG.58487	MS.gene022228	2.0384	2.19238	0.0001	0.0001	0.0001	0.0001	14102.9	13.7837	0.048106	0.879729	up	yes
262791	i	chr7.4	+	88528660	88529148	MSTRG.138398.2	1	489	MSTRG.138398	MS.gene021716	2.57726	0.0001	0.065762	0.927672	31.9108	5.90852	0.068215	-3.87377	0.048207	0.881096	down	yes
209029	u	chr6.2	.	14041012	14041312	MSTRG.109941.1	1	301	MSTRG.109941	.	0.0001	4.90062	3.30614	0.0001	0.0001	0.0001	27356.2	14.7396	0.0482499	0.881096	up	yes
8275	u	51264	.	83167	83981	MSTRG.4400.1	1	815	MSTRG.4400	.	17.9151	9.6192	12.8774	1.2815	3.86593	2.67788	5.16423	2.36855	0.0482808	0.881202	up	yes
254360	x	chr7.4	-	1914856	1915147	MSTRG.133971.1	2	256	MSTRG.133971	MS.gene22872	0.0001	4.37256	5.14647	0.0001	0.0001	0.0001	31730.4	14.9536	0.0483841	0.882334	up	yes
18163	i	chr1.1	.	63883186	63883528	MSTRG.9378.1	1	343	MSTRG.9378	MS.gene005454	0.0001	4.79297	2.49056	0.0001	0.0001	0.0001	24278.8	14.5674	0.0484053	0.882334	up	yes
289617	i	chr8.3	.	57665783	57666052	MSTRG.152466.1	1	270	MSTRG.152466	MS.gene88450	0.0001	5.95524	3.40666	0.0001	0.0001	0.0001	31206.7	14.9296	0.0485351	0.88429	up	yes
180145	u	chr5.2	.	36768088	36768389	MSTRG.94837.1	1	302	MSTRG.94837	.	0.0001	5.80324	2.65265	0.0001	0.0001	0.0001	28186.6	14.7827	0.0485759	0.884445	up	yes
247546	u	chr7.3	-	21137098	21137460	MSTRG.130420.1	2	225	MSTRG.130420	.	7.61823	4.48049	0.0001	0.0001	0.0001	0.0001	40329.4	15.2995	0.0485892	0.884445	up	yes
131642	u	chr4.1	-	39247040	39249078	MSTRG.69445.2	3	456	MSTRG.69445	.	0.0001	0.0001	0.0001	2.71212	0.0001	2.60664	5.6403e-05	-14.1139	0.0486513	0.88529	down	yes
114882	i	chr3.3	.	91781963	91782433	MSTRG.60453.1	1	471	MSTRG.60453	MS.gene014575	0.0001	0.0001	0.0001	4.15098	1.69835	0.0001	5.12871e-05	-14.251	0.0488061	0.886306	down	yes
104024	u	chr3.2	.	85908193	85908711	MSTRG.54696.1	1	519	MSTRG.54696	.	0.0001	0.0001	0.0001	3.78273	1.51048	0.0001	5.66754e-05	-14.1069	0.0488164	0.886306	down	yes
207	u	10694	-	2919	6138	MSTRG.99.1	2	2552	MSTRG.99	.	0.20249	0.608748	0.22276	7.43023	0.704657	0.358064	0.121748	-3.03803	0.0488825	0.88642	down	yes
266135	i	chr8.1	.	20441029	20441302	MSTRG.140214.1	1	274	MSTRG.140214	MS.gene48279	6.42962	3.48963	0.0001	0.0001	0.0001	0.0001	33064.5	15.013	0.0488985	0.88642	up	yes
45633	u	chr1.4	.	39951793	39952195	MSTRG.24117.1	1	403	MSTRG.24117	.	0.0001	3.4119	2.64733	0.0001	0.0001	0.0001	20197.7	14.3019	0.0490002	0.887913	up	yes
43773	u	chr1.4	.	18424735	18425084	MSTRG.23155.1	1	350	MSTRG.23155	.	57.6625	3.135	59.8814	8.19882	0.0001	0.0001	14.7187	3.87958	0.0490824	0.888893	up	yes
218512	i	chr6.3	.	51083303	51083563	MSTRG.115030.1	1	261	MSTRG.115030	MS.gene79813	0.0001	4.61116	4.67614	0.0001	0.0001	0.0001	30958	14.918	0.0491322	0.889622	up	yes
198271	j	chr5.4	-	51500172	51501806	MSTRG.104210.2	2	323	MSTRG.104210	MS.gene050016	0.402607	0.0001	0.636323	3.70999	4.32486	7.45285	0.0670874	-3.89781	0.0491751	0.889882	down	yes
122376	i	chr3.4	.	77663838	77664098	MSTRG.64419.1	1	261	MSTRG.64419	MS.gene044316	0.0001	6.61428	3.01529	0.0001	0.0001	0.0001	32098.9	14.9702	0.049425	0.891712	up	yes
251127	u	chr7.3	.	57593568	57593989	MSTRG.132371.1	1	422	MSTRG.132371	.	0.0001	2.36025	3.31257	0.0001	0.0001	0.0001	18909.7	14.2068	0.0494335	0.891712	up	yes
169227	u	chr5.1	.	15075836	15076085	MSTRG.89166.1	1	250	MSTRG.89166	.	0.0001	0.0001	0.0001	7.17406	3.59443	0.0001	2.78588e-05	-15.1315	0.0494515	0.891712	down	yes
161366	i	chr4.4	+	31098212	31098873	MSTRG.85141.1	1	662	MSTRG.85141	MS.gene031570	6.26788	5.46939	1.13726	13.4465	30.9043	19.9908	0.200097	-2.32123	0.049458	0.891712	down	yes
232564	u	chr7.1	-	60789574	60791475	MSTRG.122534.1	5	1252	MSTRG.122534	.	1.93028	4.75478	12.0293	0.79381	1.325	0.0001	8.83208	3.14275	0.0494602	0.891712	up	yes
51327	u	chr1.4	.	86495224	86495871	MSTRG.27092.1	1	648	MSTRG.27092	.	1.47508	2.62428	0.0001	0.0001	0.0001	0.0001	13664.8	13.7382	0.0495544	0.892623	up	yes
229096	o	chr7.1	-	20321464	20322344	MSTRG.120703.2	2	706	MSTRG.120703	MS.gene72279	0.347621	0.198603	0.0001	6.40093	0.58522	1.5371	0.0640981	-3.96357	0.0495921	0.892623	down	yes
300555	u	chr8.4	.	73395365	73395616	MSTRG.158102.1	1	252	MSTRG.158102	.	2.53894	3.28849	0.0001	12.7319	29.0347	13.4922	0.105459	-3.24525	0.0496087	0.892623	down	yes
138275	i	chr4.2	.	14650884	14651131	MSTRG.72941.1	1	248	MSTRG.72941	MS.gene09043	0.0001	19.9258	9.99916	0.839856	0.0001	0.0001	35.6227	5.15472	0.0496128	0.892623	up	yes
85888	u	chr3.1	.	9831973	9832448	MSTRG.45104.1	1	476	MSTRG.45104	.	0.897763	0.0001	0.0001	6.72232	2.26452	6.78108	0.0569487	-4.13419	0.049619	0.892623	down	yes
142276	u	chr4.2	+	42572915	42573371	MSTRG.75117.2	2	352	MSTRG.75117	.	0.0001	0.0001	0.0001	3.3136	0.0001	3.4853	4.41241e-05	-14.4681	0.0496515	0.892623	down	yes
154293	u	chr4.3	-	64741928	64748626	MSTRG.81331.2	2	365	MSTRG.81331	.	2.03528	0.0001	0.0001	4.65401	21.0767	6.85578	0.0624638	-4.00084	0.0496586	0.892623	down	yes
156741	i	chr4.3	.	89740286	89740547	MSTRG.82614.1	1	262	MSTRG.82614	MS.gene034311	0.0001	3.36538	5.71255	0.0001	0.0001	0.0001	30260.1	14.8851	0.0496923	0.893019	up	yes
95306	x	chr3.1	-	92556916	92558511	MSTRG.50129.6	2	661	MSTRG.50129	MS.gene68163	0.469617	0.054285	0.0001	4.41033	3.1649	0.741563	0.0630053	-3.98838	0.0497231	0.89323	down	yes
220950	u	chr6.3	.	81803404	81804717	MSTRG.116401.1	1	1314	MSTRG.116401	.	0.0001	0.417035	0.0001	1.97903	1.16805	3.75291	0.0604689	-4.04766	0.0498922	0.895407	down	yes
277808	i	chr8.2	.	33311322	33311954	MSTRG.146292.1	1	633	MSTRG.146292	MS.gene056442	2.28103	1.11165	2.2293	8.84953	13.5351	9.5463	0.176067	-2.5058	0.0499176	0.895671	down	yes
104532	i	chr3.2	.	89255948	89256407	MSTRG.54952.1	1	460	MSTRG.54952	MS.gene42345	1.78876	0.0001	3.62766	0.0001	0.0001	0.0001	18055	14.1401	0.0500061	0.896679	up	no
164376	u	chr4.4	.	60906904	60907660	MSTRG.86717.1	1	757	MSTRG.86717	.	0.0001	2.11259	1.14322	0.0001	0.0001	0.0001	10853	13.4058	0.050063	0.8972	up	no
198461	u	chr5.4	.	53468450	53468865	MSTRG.104313.1	1	416	MSTRG.104313	.	0.0001	3.55492	2.26647	0.0001	0.0001	0.0001	19405	14.2441	0.0501452	0.897873	up	no
205462	j	chr6.1	-	60184649	60186548	MSTRG.107876.3	3	412	MSTRG.107876	MS.gene042736	2.70718	3.76519	0.0001	0.0001	0.0001	0.0001	21574.9	14.3971	0.0501544	0.897873	up	no
115870	u	chr3.4	.	3745226	3745718	MSTRG.60960.1	1	493	MSTRG.60960	.	0.0001	0.0001	0.0001	1.82371	0.0001	2.9684	6.26017e-05	-13.9634	0.0501688	0.897958	down	no
135642	u	chr4.1	.	86197179	86197657	MSTRG.71551.1	1	479	MSTRG.71551	.	3.75308	1.79945	0.0001	0.0001	0.0001	0.0001	18508.8	14.1759	0.0502507	0.898579	up	no
152812	i	chr4.3	.	43749751	43750535	MSTRG.80605.1	1	785	MSTRG.80605	MS.gene03699	6.07609	9.82706	6.05318	0.448867	0.840173	2.06989	6.53671	2.70856	0.0502764	0.898579	up	no
300180	u	chr8.4	-	70237700	70240361	MSTRG.157889.1	2	450	MSTRG.157889	.	0.0001	2.20331	3.09595	0.0001	0.0001	0.0001	17664.5	14.1086	0.05029	0.898579	up	no
65605	u	chr2.2	.	56370876	56371228	MSTRG.34444.1	1	353	MSTRG.34444	.	0.0001	0.0001	0.160761	0.0001	5.9216	6.2735	0.0131987	-6.24346	0.0504106	0.900046	down	no
62996	i	chr2.2	.	23886148	23886739	MSTRG.33155.1	1	592	MSTRG.33155	MS.gene039052	0.072889	0.093268	0.065459	4.65842	2.15185	0.089283	0.0335697	-4.8967	0.0504792	0.900756	down	no
98116	u	chr3.2	-	36944195	36944700	MSTRG.51627.1	2	259	MSTRG.51627	.	6.77606	0.0001	3.25753	0.0001	0.0001	0.0001	33445.6	15.0295	0.0505382	0.901314	up	no
62132	u	chr2.2	-	14965897	14967716	MSTRG.32693.1	2	700	MSTRG.32693	.	3.79633	5.88294	2.00243	0.0001	0.0001	0.635929	18.3637	4.19879	0.0506185	0.901941	up	no
194542	u	chr5.4	-	11229809	11232171	MSTRG.102282.1	1	2363	MSTRG.102282	.	4.56947	0.834508	2.7908	0.75436	0.0001	0.084603	9.76658	3.28785	0.0506288	0.901941	up	no
170262	i	chr5.1	+	24573175	24573759	MSTRG.89731.2	2	561	MSTRG.89731	MS.gene86174	0.0001	0.0001	0.0001	2.4197	0.0001	1.81348	7.08672e-05	-13.7845	0.0506514	0.901941	down	no
4489	u	37520	+	94691	95003	MSTRG.2002.1	1	313	MSTRG.2002	.	0.0001	4.48849	3.18908	0.0001	0.0001	0.0001	25592.2	14.6434	0.0506517	0.901941	up	no
32372	u	chr1.3	.	4438582	4438836	MSTRG.16942.1	1	255	MSTRG.16942	.	2.76931	3.67491	7.11026	0.420683	0.0001	0.0001	32.2049	5.00921	0.0507356	0.902747	up	no
211194	u	chr6.2	+	42788837	42790624	MSTRG.111075.1	2	441	MSTRG.111075	.	3.38075	0.0001	2.37911	0.0001	0.0001	0.0001	19199.9	14.2288	0.0508206	0.903915	up	no
294339	u	chr8.4	+	12894834	12895462	MSTRG.154891.1	2	482	MSTRG.154891	.	2.91856	0.0001	2.34094	0.0001	0.0001	0.0001	17532	14.0977	0.0509063	0.904775	up	no
76026	u	chr2.3	.	73524787	73525056	MSTRG.39947.1	1	270	MSTRG.39947	.	4.30804	5.27397	0.0001	0.0001	0.0001	0.0001	31940.3	14.9631	0.0509323	0.90504	up	no
168484	u	chr5.1	.	9682379	9682839	MSTRG.88791.1	1	461	MSTRG.88791	.	0.0001	2.53371	2.60114	0.0001	0.0001	0.0001	17116.5	14.0631	0.0509727	0.9051	up	no
219552	u	chr6.3	.	67444820	67445042	MSTRG.115562.1	1	223	MSTRG.115562	.	0.0001	0.0001	0.0001	0.0001	5.23572	5.9094	2.69174e-05	-15.1811	0.0510176	0.905456	down	no
301010	u	chr8.4	.	76945802	76946307	MSTRG.158338.1	1	506	MSTRG.158338	.	0.0001	0.0001	0.0001	2.54534	2.63776	0.0001	5.78792e-05	-14.0766	0.0510313	0.905456	down	no
31994	u	chr1.3	.	2398832	2399129	MSTRG.16750.1	1	298	MSTRG.16750	.	0.0001	5.22809	2.90408	0.0001	0.0001	0.0001	27107.5	14.7264	0.0510862	0.905516	up	no
108329	u	chr3.3	+	43064741	43071116	MSTRG.56968.1	2	285	MSTRG.56968	.	0.0001	0.0001	0.0001	0.0001	3.6651	4.93673	3.48759e-05	-14.8074	0.0510946	0.905516	down	no
181733	o	chr5.2	-	60051791	60052187	MSTRG.95665.2	2	293	MSTRG.95665	MS.gene000733	0.0001	0.0001	0.0001	2.88089	0.0001	5.12516	3.74712e-05	-14.7039	0.0512499	0.907077	down	no
7274	u	43316	.	46002	46269	MSTRG.3971.1	1	268	MSTRG.3971	.	4.05074	5.53178	0.0001	0.0001	0.0001	0.0001	31942.1	14.9632	0.0512828	0.907209	up	no
204961	u	chr6.1	.	51518262	51519734	MSTRG.107607.1	1	1473	MSTRG.107607	.	0.341831	0.0001	0.0001	0.937183	3.56973	1.44142	0.0575003	-4.12029	0.0514013	0.908884	down	no
254885	u	chr7.4	.	5169221	5169556	MSTRG.134239.1	1	336	MSTRG.134239	.	0.0001	0.0001	0.0001	3.90016	0.0001	3.08009	4.29778e-05	-14.5061	0.0514544	0.909521	down	no
120689	u	chr3.4	.	64693003	64693340	MSTRG.63382.1	1	338	MSTRG.63382	.	0.0001	0.0001	0.0001	2.8541	4.85252	0.0001	3.89271e-05	-14.6489	0.0516493	0.910964	down	no
262909	u	chr7.4	.	89788545	89788844	MSTRG.138453.1	1	300	MSTRG.138453	.	0.0001	0.0001	0.0001	0.0001	2.87444	5.34166	3.65133e-05	-14.7412	0.0516794	0.911044	down	no
298333	u	chr8.4	-	49626994	49628323	MSTRG.156965.1	2	1103	MSTRG.156965	.	2.19895	3.93737	1.55677	0.485219	0.0001	0.0001	15.8483	3.98626	0.0517216	0.911444	up	no
289729	i	chr8.3	.	58519081	58519842	MSTRG.152535.1	1	762	MSTRG.152535	MS.gene88509	0.0001	1.60849	1.4544	0.0001	0.0001	0.0001	10210	13.3177	0.0517451	0.911514	up	no
190465	i	chr5.3	-	58973833	58974720	MSTRG.100158.2	1	888	MSTRG.100158	MS.gene009719	0.056301	0.156529	0.0001	1.41681	0.217572	3.10021	0.0449733	-4.47479	0.0517988	0.911862	down	no
79298	u	chr2.4	.	22691468	22691793	MSTRG.41687.1	1	326	MSTRG.41687	.	4.32597	3.56856	0.0001	0.0001	0.0001	0.0001	26315.4	14.6836	0.0518135	0.911862	up	no
205871	u	chr6.1	.	64838644	64838943	MSTRG.108137.1	1	300	MSTRG.108137	.	1.67839	0.0001	0.88906	42.389	11.576	0.0001	0.047578	-4.39356	0.0518384	0.911956	down	no
20410	u	chr1.1	.	77813555	77814122	MSTRG.10625.1	1	568	MSTRG.10625	.	1.77295	3.2797	2.94275	0.388755	0.0001	0.0001	20.5561	4.36149	0.0518566	0.912104	up	no
171296	u	chr5.1	.	33702983	33703671	MSTRG.90252.1	1	689	MSTRG.90252	.	0.0001	1.4774	1.93486	0.0001	0.0001	0.0001	11374.5	13.4735	0.0519335	0.91274	up	no
294623	u	chr8.4	+	15367628	15368104	MSTRG.155036.1	3	203	MSTRG.155036	.	0.0001	5.24144	6.20833	0.0001	0.0001	0.0001	38166.2	15.22	0.0519353	0.91274	up	no
99151	u	chr3.2	+	50028599	50033857	MSTRG.52138.1	2	404	MSTRG.52138	.	2.13025	3.55553	1.32039	0.0001	0.110096	0.0001	63.5215	5.98917	0.0519384	0.91274	up	no
2592	u	23879	.	158915	159279	MSTRG.1162.1	1	365	MSTRG.1162	.	0.0001	0.0001	0.0001	0.0001	3.73766	2.97501	4.4691e-05	-14.4497	0.0519675	0.91274	down	no
286509	i	chr8.3	.	26423038	26423327	MSTRG.150842.1	1	290	MSTRG.150842	MS.gene87429	0.0001	0.0001	0.0001	0.0001	4.70909	3.76673	3.53944e-05	-14.7861	0.0519686	0.91274	down	no
21731	u	chr1.2	.	4022963	4023239	MSTRG.11348.1	1	277	MSTRG.11348	.	0.0001	5.30977	3.32228	0.0001	0.0001	0.0001	28773.8	14.8125	0.0519708	0.91274	up	no
179775	i	chr5.2	.	32041655	32042359	MSTRG.94657.1	1	705	MSTRG.94657	MS.gene55298	1.51368	2.13313	0.0001	0.0001	0.0001	0.0001	12156.4	13.5694	0.0520486	0.913763	up	no
150733	u	chr4.3	-	27519937	27521081	MSTRG.79512.1	2	913	MSTRG.79512	.	0.732669	0.779748	0.469166	6.75232	3.94175	2.5827	0.149252	-2.74418	0.0520809	0.913867	down	no
301058	u	chr8.4	+	77315783	77316253	MSTRG.158369.1	3	207	MSTRG.158369	.	0.518512	0.764546	0.0001	4.40214	9.72468	6.94951	0.0608814	-4.03785	0.0520839	0.913867	down	no
133770	u	chr4.1	+	68438143	68438563	MSTRG.70564.4	2	230	MSTRG.70564	.	0.0001	0.0001	0.0001	0.0001	5.60107	5.13258	2.79492e-05	-15.1268	0.0521158	0.914084	down	no
131471	i	chr4.1	.	37363085	37363505	MSTRG.69357.1	1	421	MSTRG.69357	MS.gene67365	0.0001	3.77801	1.88263	0.0001	0.0001	0.0001	18869.1	14.2037	0.0521749	0.914232	up	no
71413	u	chr2.3	.	27733605	27734915	MSTRG.37556.1	1	1311	MSTRG.37556	.	3.39165	1.95122	0.875108	8.83031	9.59277	10.8985	0.212061	-2.23745	0.0521812	0.914232	down	no
258539	u	chr7.4	.	31662749	31663027	MSTRG.136187.1	1	279	MSTRG.136187	.	0.0001	4.82225	7.03848	0.0001	0.0001	0.037374	315.666	8.30225	0.0521976	0.914232	up	no
85095	u	chr3.1	.	1749952	1750557	MSTRG.44642.1	1	606	MSTRG.44642	.	2.03793	2.15096	0.0001	0.0001	0.0001	0.0001	13963.3	13.7694	0.052222	0.914232	up	no
190210	u	chr5.3	+	56577735	56580457	MSTRG.100041.1	9	959	MSTRG.100041	.	0.0001	0.0001	0.000134	2.21959	0.0001	1.40798	9.207e-05	-13.4069	0.0522536	0.914393	down	no
110833	j	chr3.3	+	65161013	65161961	MSTRG.58335.2	2	581	MSTRG.58335	MS.gene70708	0.0001	0.0001	0.0001	0.0001	2.74084	1.57378	6.95293e-05	-13.812	0.0522605	0.914393	down	no
196914	i	chr5.4	.	31038742	31039305	MSTRG.103515.1	1	564	MSTRG.103515	MS.gene53070	0.0001	0.0001	0.0001	2.41398	0.0001	1.68911	7.31138e-05	-13.7395	0.0523303	0.915276	down	no
260380	u	chr7.4	+	53628128	53628939	MSTRG.137161.1	3	242	MSTRG.137161	.	0.0001	0.0001	0.0001	4.55092	0.0001	4.88752	3.17846e-05	-14.9413	0.0524135	0.916212	down	no
32183	u	chr1.3	-	3348131	3349372	MSTRG.16863.1	1	1242	MSTRG.16863	.	2.85348	1.66769	0.276051	2.94745	15.733	8.35427	0.177447	-2.49454	0.0524647	0.916593	down	no
99005	u	chr3.2	.	48137459	48137985	MSTRG.52066.1	1	527	MSTRG.52066	.	0.0001	0.716481	0.0001	15.9766	6.96013	0.0001	0.0312459	-5.00019	0.0525453	0.917144	down	no
181764	u	chr5.2	-	60266740	60278920	MSTRG.95869.1	2	757	MSTRG.95869	.	0.26506	3.85255	1.09868	0.0001	0.10925	0.0001	47.6591	5.57468	0.0525945	0.917489	up	no
83626	u	chr2.4	.	67944493	67945194	MSTRG.43840.1	1	702	MSTRG.43840	.	0.117	0.0001	0.0001	0.273835	2.70666	1.51508	0.0260701	-5.26146	0.0526583	0.917917	down	no
54561	u	chr2.1	.	23668829	23669307	MSTRG.28760.1	1	479	MSTRG.28760	.	0.0001	2.39291	2.43462	0.0001	0.0001	0.0001	16092.1	13.9741	0.0526733	0.918008	up	no
233709	u	chr7.1	.	75905406	75905657	MSTRG.123117.1	1	252	MSTRG.123117	.	0.0001	5.35803	3.83803	0.0001	0.0001	0.0001	30653.9	14.9038	0.0526932	0.918183	up	no
186731	u	chr5.3	+	15816476	15823533	MSTRG.98259.1	2	977	MSTRG.98259	.	0.0001	0.0001	0.670208	1.04557	6.85823	3.99793	0.0563286	-4.14999	0.0527316	0.918682	down	no
79484	u	chr2.4	.	24357645	24358355	MSTRG.41800.1	1	711	MSTRG.41800	.	0.0001	0.0001	0.0001	1.72684	1.88065	0.0001	8.31581e-05	-13.5538	0.0528434	0.919706	down	no
233425	u	chr7.1	+	71066681	71068198	MSTRG.123000.2	2	449	MSTRG.123000	.	0.0001	3.50014	1.77006	0.0001	0.0001	0.0001	17567.6	14.1006	0.0528911	0.919706	up	no
118807	o	chr3.4	+	44532336	44579358	MSTRG.62485.1	2	703	MSTRG.62485	MS.gene65962	6.26102	8.2081	7.08751	0.95808	1.69444	1.0659	5.79725	2.53537	0.0528916	0.919706	up	no
92967	u	chr3.1	.	76736476	76737014	MSTRG.48834.1	1	539	MSTRG.48834	.	0.0001	2.89695	1.48452	0.0001	0.0001	0.0001	14605.2	13.8342	0.0529004	0.919706	up	no
171311	u	chr5.1	.	33919577	33920540	MSTRG.90260.1	1	964	MSTRG.90260	.	0.865575	1.78425	0.0001	0.0001	0.0001	0.0001	8833.1	13.1087	0.0529944	0.920057	up	no
23526	u	chr1.2	.	17999937	18000162	MSTRG.12379.1	1	226	MSTRG.12379	.	0.0001	0.0001	0.0001	0.0001	4.60655	6.15711	2.78713e-05	-15.1309	0.0530562	0.920392	down	no
27274	x	chr1.2	+	57619135	57704932	MSTRG.14244.2	3	291	MSTRG.14244	MS.gene67190	0.0001	2.87006	0.0001	22.3276	13.5474	6.12443	0.0683406	-3.87111	0.0531059	0.920743	down	no
164427	u	chr4.4	.	62214225	62214538	MSTRG.86738.1	1	314	MSTRG.86738	.	8.54853	12.9444	35.3308	4.18444	2.45013	0.0001	8.56466	3.0984	0.0531246	0.920894	up	no
154296	u	chr4.3	.	64755981	64756450	MSTRG.81332.1	1	470	MSTRG.81332	.	2.46364	1.10099	1.8886	11.5583	14.8837	6.72853	0.1644	-2.60472	0.0532849	0.922854	down	no
257991	i	chr7.4	+	27192384	27193068	MSTRG.135919.2	1	685	MSTRG.135919	MS.gene058656	4.73359	5.89009	7.33796	0.454954	0.349519	1.73823	7.06398	2.82048	0.0532869	0.922854	up	no
271289	u	chr8.1	.	70575931	70576421	MSTRG.142903.1	1	491	MSTRG.142903	.	0.0001	1.72066	2.9347	0.0001	0.0001	0.0001	15518.2	13.9217	0.0533234	0.922973	up	no
143726	j	chr4.2	+	62898609	62902476	MSTRG.75869.6	3	3157	MSTRG.75869	MS.gene35553	9.33966	3.90252	3.89939	0.675431	1.37012	1.51801	4.81024	2.26611	0.0534286	0.924109	up	no
205910	u	chr6.1	.	65219963	65221023	MSTRG.108187.1	1	1061	MSTRG.108187	.	9.56374	3.22425	4.46652	9.25717	35.7132	36.714	0.211234	-2.24309	0.0535132	0.92523	down	no
150291	u	chr4.3	.	24628441	24628833	MSTRG.79279.1	1	393	MSTRG.79279	.	0.0001	3.27302	2.53058	0.0001	0.0001	0.0001	19345.7	14.2397	0.05354	0.925357	up	no
13744	u	chr1.1	.	21066359	21066607	MSTRG.7089.1	1	249	MSTRG.7089	.	0.0001	4.42635	4.81831	0.0001	0.0001	0.0001	30815.9	14.9114	0.0535684	0.92567	up	no
72369	u	chr2.3	.	42522396	42522825	MSTRG.38035.1	1	430	MSTRG.38035	.	5.31643	8.17964	5.3205	0.691064	1.01418	0.0001	11.0339	3.46387	0.0536012	0.926067	up	no
137860	j	chr4.2	-	11916599	11917544	MSTRG.72743.1	2	835	MSTRG.72743	MS.gene47979	0.0001	1.56829	1.15224	0.0001	0.0001	0.0001	9068.79	13.1467	0.0536297	0.926358	up	no
203724	u	chr6.1	.	27404539	27404836	MSTRG.106973.1	1	298	MSTRG.106973	.	0.0001	0.0001	0.0001	5.86611	2.79391	0.0001	3.46416e-05	-14.8171	0.0536379	0.926358	down	no
272766	j	chr8.1	+	83792385	83799679	MSTRG.143661.2	2	364	MSTRG.143661	MS.gene022880	0.0001	0.0001	0.0001	2.28292	4.67584	0.0001	4.31105e-05	-14.5016	0.0538563	0.928758	down	no
249800	u	chr7.3	.	38909710	38910123	MSTRG.131682.1	1	414	MSTRG.131682	.	0.0001	3.57275	2.02778	0.0001	0.0001	0.0001	18668.7	14.1883	0.0538701	0.928825	up	no
203252	j	chr6.1	+	19163789	19166405	MSTRG.106791.2	3	973	MSTRG.106791	MS.gene71112	0.955074	0.711392	0.045859	7.54543	3.451	1.97575	0.132	-2.92139	0.0539972	0.929866	down	no
156069	u	chr4.3	-	84005413	84006021	MSTRG.82273.1	3	239	MSTRG.82273	.	5.18297	0.0001	4.87349	0.0001	0.0001	0.0001	33521.9	15.0328	0.0540365	0.929866	up	no
102805	u	chr3.2	.	78120904	78121289	MSTRG.54058.1	1	386	MSTRG.54058	.	6.62864	5.63827	3.36301	0.85808	0.0001	0.0001	18.2107	4.18672	0.0540492	0.929866	up	no
146411	u	chr4.2	+	92233353	92234168	MSTRG.77227.1	2	484	MSTRG.77227	.	0.0001	0.0001	0.0001	3.48721	1.75324	0.0001	5.72459e-05	-14.0925	0.0540697	0.929866	down	no
202958	u	chr6.1	.	14915878	14916178	MSTRG.106669.1	1	301	MSTRG.106669	.	0.0001	0.0001	0.0001	0.0001	3.46104	4.53694	3.7509e-05	-14.7024	0.0540698	0.929866	down	no
287893	x	chr8.3	-	37601052	37632494	MSTRG.151583.1	2	353	MSTRG.151583	MS.gene038560	9.87889	0.205842	0.398263	21.4389	3.33118	64.3028	0.11769	-3.08693	0.0541089	0.929866	down	no
227712	i	chr7.1	.	11380791	11381091	MSTRG.119959.1	1	301	MSTRG.119959	MS.gene018744	3.31004	0.0001	4.51914	0.0001	0.0001	0.0001	26097.6	14.6716	0.0541232	0.929866	up	no
210337	i	chr6.2	.	29125274	29125514	MSTRG.110673.1	1	241	MSTRG.110673	MS.gene03239	6.80129	0.0001	3.43788	0.0001	0.0001	0.0001	34130.9	15.0588	0.0541493	0.929866	up	no
59868	u	chr2.1	.	75008494	75009096	MSTRG.31463.1	1	603	MSTRG.31463	.	2.81203	0.0001	1.30735	0.0001	0.0001	0.0001	13731.6	13.7452	0.0542044	0.930471	up	no
165684	u	chr4.4	.	77970304	77970773	MSTRG.87334.1	1	470	MSTRG.87334	.	0.0001	0.0001	0.0001	1.97422	0.0001	2.70957	6.40493e-05	-13.9305	0.0544071	0.932482	down	no
213604	u	chr6.2	.	81242780	81243387	MSTRG.112424.1	1	608	MSTRG.112424	.	1.36818	8.12561	1.77125	0.731938	0.0001	0.082794	13.825	3.78921	0.0544105	0.932482	up	no
265935	u	chr8.1	+	18773448	18774011	MSTRG.140099.1	2	335	MSTRG.140099	.	2.55303	0.0001	4.36201	0.0001	0.0001	0.0001	23050.5	14.4925	0.0546599	0.935713	up	no
233708	u	chr7.1	.	75894391	75894642	MSTRG.123116.1	1	252	MSTRG.123116	.	0.0001	5.35623	3.56029	0.0001	0.0001	0.0001	29722.1	14.8592	0.0547272	0.935918	up	no
7481	u	43367	.	34566	35331	MSTRG.4063.1	1	766	MSTRG.4063	.	1.86245	0.0001	1.294	0.0001	0.0001	0.0001	10521.8	13.3611	0.0548407	0.936828	up	no
132461	u	chr4.1	-	48480546	48481212	MSTRG.69892.1	3	261	MSTRG.69892	.	0.0001	0.0001	0.0001	5.88469	3.66756	0.0001	3.14059e-05	-14.9586	0.0548453	0.936828	down	no
47911	u	chr1.4	.	63544123	63545184	MSTRG.25281.1	1	1062	MSTRG.25281	.	3.28472	0.70017	2.29646	0.0001	0.313788	0.163699	13.1523	3.71724	0.0550664	0.938549	up	no
231011	u	chr7.1	-	37465480	37466007	MSTRG.121760.1	2	432	MSTRG.121760	.	0.582775	0.0001	0.0001	0.522922	4.29536	7.37685	0.0478039	-4.38673	0.0550986	0.938914	down	no
174251	u	chr5.1	.	68829934	68830439	MSTRG.91737.1	1	506	MSTRG.91737	.	0.971569	9.44427	4.45053	0.0001	0.889327	0.196125	13.6948	3.77555	0.0552156	0.940063	up	no
163979	u	chr4.4	.	53693995	53694239	MSTRG.86515.1	1	245	MSTRG.86515	.	0.0001	0.0001	0.0001	0.0001	6.24631	3.42098	3.10322e-05	-14.9759	0.0552306	0.940147	down	no
78582	u	chr2.4	.	15807785	15808570	MSTRG.41304.1	1	786	MSTRG.41304	.	1.77189	1.31238	0.0001	0.0001	0.0001	0.0001	10281.2	13.3277	0.0552565	0.940188	up	no
91378	u	chr3.1	+	65765572	65766184	MSTRG.47988.2	2	495	MSTRG.47988	.	0.0001	0.0001	0.0001	2.59655	0.0001	1.8559	6.7377e-05	-13.8574	0.0552598	0.940188	down	no
7416	u	43358	-	65429	65982	MSTRG.4053.2	2	534	MSTRG.4053	.	0.0001	0.0001	0.0001	1.86386	0.0001	2.22251	7.34131e-05	-13.7336	0.055265	0.940188	down	no
516	u	10997	-	7000	7339	MSTRG.223.2	2	258	MSTRG.223	.	3.86344	3.17681	8.1648	0.014882	0.0001	0.606703	24.4578	4.61222	0.0553012	0.940236	up	no
290465	u	chr8.3	.	65684219	65684524	MSTRG.152882.1	1	306	MSTRG.152882	.	0.0001	3.80871	3.38729	0.0001	0.0001	0.0001	23987	14.55	0.0553247	0.940236	up	no
57886	i	chr2.1	.	60901172	60901561	MSTRG.30408.1	1	390	MSTRG.30408	MS.gene03062	6.85824	4.61001	2.31117	0.182706	0.502524	0.656432	10.2704	3.36042	0.0553439	0.940236	up	no
155015	u	chr4.3	.	73204652	73204968	MSTRG.81654.1	1	317	MSTRG.81654	.	0.0001	3.38826	3.6583	0.0001	0.0001	0.0001	23488.8	14.5197	0.0553531	0.940236	up	no
215981	x	chr6.3	-	14083504	14087539	MSTRG.113764.3	2	330	MSTRG.113764	MS.gene074567	66.9201	17.6817	70.4478	9.28139	5.92385	16.5758	4.87868	2.28649	0.0553726	0.940236	up	no
297167	u	chr8.4	+	36173559	36174008	MSTRG.156352.1	2	391	MSTRG.156352	.	2.23305	4.03021	0.0001	0.0001	0.0001	0.0001	20877.8	14.3497	0.0554088	0.94027	up	no
180443	u	chr5.2	.	44290673	44290903	MSTRG.94980.1	1	231	MSTRG.94980	.	0.0001	0.0001	0.0001	0.0001	3.39367	6.60754	2.99961e-05	-15.0249	0.0554314	0.940312	down	no
270553	u	chr8.1	.	63181837	63182075	MSTRG.142517.1	1	239	MSTRG.142517	.	0.0001	0.0001	0.0001	3.7708	0.0001	5.30889	3.30404e-05	-14.8854	0.0554435	0.940347	down	no
75848	u	chr2.3	.	72433329	72434050	MSTRG.39840.1	1	722	MSTRG.39840	.	0.406812	0.0001	0.0001	0.498753	4.72057	2.55137	0.0523778	-4.2549	0.0554942	0.941037	down	no
41650	u	chr1.4	.	1647028	1647292	MSTRG.22012.1	1	265	MSTRG.22012	.	0.0001	3.8384	4.50776	0.0001	0.0001	0.0001	27820.9	14.7639	0.0555471	0.941456	up	no
85230	u	chr3.1	.	3471901	3472446	MSTRG.44733.1	1	546	MSTRG.44733	.	0.0001	2.41223	1.6491	0.0001	0.0001	0.0001	13538.1	13.7247	0.0555791	0.941456	up	no
61970	u	chr2.2	.	13632730	13633094	MSTRG.32604.1	1	365	MSTRG.32604	.	0.0001	0.0001	0.0001	3.31122	3.29116	0.0001	4.54375e-05	-14.4258	0.0556534	0.941717	down	no
218489	u	chr6.3	+	50780660	50820929	MSTRG.115020.1	2	211	MSTRG.115020	.	0.0001	0.0001	0.0001	0.0001	4.95708	5.88251	2.76761e-05	-15.141	0.0556552	0.941717	down	no
262805	u	chr7.4	.	88581370	88581888	MSTRG.138406.1	1	519	MSTRG.138406	.	0.0001	0.0001	0.0001	0.0001	2.53286	1.95196	6.68908e-05	-13.8678	0.0557248	0.942507	down	no
71163	i	chr2.3	-	26083763	26084471	MSTRG.37405.1	2	683	MSTRG.37405	MS.gene063413	4.30826	16.7763	17.3277	0.992615	3.5771	2.48544	5.44456	2.44482	0.0557423	0.942507	up	no
74906	u	chr2.3	.	65743383	65743750	MSTRG.39339.1	1	368	MSTRG.39339	.	0.0001	0.0001	0.0001	2.24694	0.0001	3.58195	5.1467e-05	-14.246	0.0557972	0.942925	down	no
166525	i	chr4.4	.	85732408	85732746	MSTRG.87728.1	1	339	MSTRG.87728	MS.gene052759	0.0001	0.0001	0.0001	3.4162	0.0001	2.9465	4.7149e-05	-14.3724	0.0560362	0.944907	down	no
172854	u	chr5.1	-	55732763	55733110	MSTRG.91180.5	2	279	MSTRG.91180	.	4.55661	2.0667	3.42025	0.254405	0.0001	0.0001	39.4476	5.30187	0.0560755	0.945066	up	no
144259	u	chr4.2	.	70772284	70772642	MSTRG.76117.1	1	359	MSTRG.76117	.	0.0001	0.0001	0.0001	3.07539	0.0001	2.89252	5.0268e-05	-14.28	0.0561293	0.945205	down	no
65938	i	chr2.2	.	59174439	59175092	MSTRG.34625.1	1	654	MSTRG.34625	MS.gene02005	0.0001	0.0001	0.0001	0.0001	2.32864	1.26149	8.356e-05	-13.5468	0.0561725	0.945205	down	no
172242	u	chr5.1	.	50211274	50211529	MSTRG.90705.1	1	256	MSTRG.90705	.	0.0001	0.0001	0.0001	4.08335	0.0001	4.28034	3.58689e-05	-14.7669	0.056181	0.945205	down	no
292971	u	chr8.4	.	2527448	2528005	MSTRG.154160.1	1	558	MSTRG.154160	.	2.8007	0.0001	1.43866	0.0001	0.0001	0.0001	14131.5	13.7866	0.0561829	0.945205	up	no
297095	u	chr8.4	.	35280268	35280536	MSTRG.156309.1	1	269	MSTRG.156309	.	0.0001	0.0001	0.0001	6.15649	3.09641	0.0001	3.24219e-05	-14.9127	0.0561939	0.945205	down	no
51263	i	chr1.4	.	86107507	86107970	MSTRG.27055.1	1	464	MSTRG.27055	MS.gene029324	0.0001	2.36721	2.35994	0.0001	0.0001	0.0001	15757.5	13.9437	0.0563413	0.9462	up	no
220740	u	chr6.3	.	79862936	79863321	MSTRG.116307.1	1	386	MSTRG.116307	.	0.0001	3.52074	2.27345	0.0001	0.0001	0.0001	19314.3	14.2374	0.0563481	0.9462	up	no
183109	j	chr5.2	+	72674741	72676879	MSTRG.96323.2	3	888	MSTRG.96323	MS.gene98561	0.0001	1.23046	1.20572	0.0001	0.0001	0.0001	8120.95	12.9874	0.0563513	0.9462	up	no
11837	u	chr1.1	.	5153309	5153553	MSTRG.6113.1	1	245	MSTRG.6113	.	0.0001	0.0001	0.0001	0.0001	6.16972	3.48849	3.10613e-05	-14.9745	0.0563858	0.946373	down	no
272586	u	chr8.1	.	82323950	82324348	MSTRG.143567.1	1	399	MSTRG.143567	.	0.0001	3.20344	2.29578	0.0001	0.0001	0.0001	18331.1	14.162	0.0564147	0.946687	up	no
32843	u	chr1.3	.	8055437	8055891	MSTRG.17235.1	1	455	MSTRG.17235	.	0.0001	16.8061	22.4219	1.69856	0.0001	0.0001	23.0922	4.52933	0.0565452	0.947687	up	no
12596	j	chr1.1	-	10742218	10743032	MSTRG.6491.2	2	518	MSTRG.6491	MS.gene31595	0.0001	0.0001	0.0001	2.42238	2.22857	0.0001	6.45015e-05	-13.9203	0.0565619	0.947797	down	no
97379	u	chr3.2	.	22467486	22467883	MSTRG.51242.1	1	398	MSTRG.51242	.	0.0001	5.20349	7.73163	0.277403	0.230496	0.0001	25.4631	4.67034	0.0566066	0.948173	up	no
234594	u	chr7.1	+	86110966	86111727	MSTRG.123599.1	2	629	MSTRG.123599	.	1.77322	2.05579	0.0001	0.0001	0.0001	0.0001	12763.7	13.6398	0.0566493	0.948271	up	no
209395	x	chr6.2	+	17781243	17796256	MSTRG.110132.1	2	236	MSTRG.110132	MS.gene55544	0.0001	0.0001	0.0001	0.0001	5.66291	4.18525	3.04623e-05	-15.0026	0.0567229	0.948806	down	no
184589	u	chr5.2	+	84075857	84077481	MSTRG.97133.1	1	1625	MSTRG.97133	.	3.27731	15.2977	14.5506	3.06924	1.07617	2.7561	4.79976	2.26296	0.0567378	0.948873	up	no
138370	u	chr4.2	.	15254147	15254389	MSTRG.73006.1	1	243	MSTRG.73006	.	0.0001	0.0001	0.0001	4.36624	5.50264	0.0001	3.03983e-05	-15.0057	0.0568809	0.950227	down	no
159747	i	chr4.4	.	19621451	19621752	MSTRG.84220.1	1	302	MSTRG.84220	MS.gene35130	1.04451	0.0001	0.0001	13.8196	8.77163	0.647688	0.0449553	-4.47536	0.0569293	0.950716	down	no
226009	u	chr7.1	.	624686	625088	MSTRG.119109.1	1	403	MSTRG.119109	.	3.51936	2.40732	0.0001	0.0001	0.0001	0.0001	19755.9	14.27	0.0569415	0.950749	up	no
262646	i	chr7.4	.	87136419	87136663	MSTRG.138339.1	1	245	MSTRG.138339	MS.gene97588	0.0001	0.0001	0.0001	0.0001	4.11456	5.08671	3.26038e-05	-14.9046	0.0569594	0.950782	down	no
113654	i	chr3.3	.	83565365	83566095	MSTRG.59798.1	1	731	MSTRG.59798	MS.gene013043	0.0001	0.0001	0.0001	1.57314	0.0001	1.31143	0.000103998	-13.2312	0.0569709	0.950782	down	no
133427	u	chr4.1	.	63879235	63879681	MSTRG.70401.1	1	447	MSTRG.70401	.	0.0001	0.0001	0.0001	3.52901	1.973	0.0001	5.45246e-05	-14.1627	0.0570198	0.951208	down	no
142717	u	chr4.2	.	47693609	47693921	MSTRG.75363.1	1	313	MSTRG.75363	.	0.0001	0.0001	0.0001	0.0001	4.32308	3.07753	4.05366e-05	-14.5904	0.0570704	0.951829	down	no
98986	u	chr3.2	.	47942662	47942959	MSTRG.52059.1	1	298	MSTRG.52059	.	3.42525	0.0001	4.2121	0.0001	0.0001	0.0001	25458.2	14.6358	0.0570877	0.951829	up	no
80523	u	chr2.4	.	34405692	34406064	MSTRG.42285.1	1	373	MSTRG.42285	.	0.0001	0.0001	0.0001	0.0001	2.27685	3.77974	4.9532e-05	-14.3013	0.0570977	0.951829	down	no
260012	u	chr7.4	.	48367409	48367685	MSTRG.136967.1	1	277	MSTRG.136967	.	0.0001	0.0001	0.0001	3.22821	0.0001	4.30285	3.98345e-05	-14.6156	0.0571983	0.952656	down	no
5011	u	40072	.	97513	97781	MSTRG.2341.1	1	269	MSTRG.2341	.	1.3574	26.0515	14.2774	0.569075	48.3941	325.173	0.11142	-3.16592	0.0572447	0.953191	down	no
63820	i	chr2.2	.	34854800	34855427	MSTRG.33571.1	1	628	MSTRG.33571	MS.gene67647	2.07126	2.54097	4.44025	0.537705	0.0001	0.0001	16.8292	4.07289	0.0572799	0.953191	up	no
99391	u	chr3.2	.	52241140	52241409	MSTRG.52262.1	1	270	MSTRG.52262	.	1.86488	7.99768	2.96353	0.0001	0.337194	0.0001	38.0152	5.2485	0.0572814	0.953191	up	no
69834	i	chr2.3	.	13350272	13351468	MSTRG.36730.1	1	1197	MSTRG.36730	MS.gene35344	0.362475	0.147046	0.071113	0.267549	2.45362	2.94198	0.102528	-3.2859	0.0575432	0.95623	down	no
103049	u	chr3.2	+	79484498	79485156	MSTRG.54195.1	2	636	MSTRG.54195	.	1.94137	1.7772	0.0001	0.0001	0.0001	0.0001	12395.6	13.5975	0.0576323	0.956868	up	no
203805	u	chr6.1	.	29085173	29085462	MSTRG.107051.1	1	290	MSTRG.107051	.	0.0001	0.0001	0.0001	4.68194	3.50725	0.0001	3.66332e-05	-14.7365	0.0576564	0.956868	down	no
281439	u	chr8.2	.	72659576	72660112	MSTRG.148113.1	1	537	MSTRG.148113	.	0.0001	0.0001	0.0001	1.50244	2.99637	0.0001	6.66828e-05	-13.8723	0.0576661	0.956868	down	no
174822	u	chr5.1	.	72951642	72951914	MSTRG.92058.1	1	273	MSTRG.92058	.	3.98963	4.48688	0.0001	0.0001	0.0001	0.0001	28255.4	14.7862	0.0577638	0.957979	up	no
196451	j	chr5.4	-	25634157	25635483	MSTRG.103299.2	2	623	MSTRG.103299	MS.gene027522	1.68705	0.0001	1.92464	0.0001	0.0001	0.0001	12039.3	13.5555	0.0578018	0.95827	up	no
115431	u	chr3.3	-	95601677	95605452	MSTRG.60730.1	2	1095	MSTRG.60730	.	3.48209	3.51421	0.540277	0.459525	0.0001	0.0001	16.3937	4.03507	0.0578319	0.958328	up	no
173756	u	chr5.1	.	64395836	64396084	MSTRG.91508.1	1	249	MSTRG.91508	.	3.69952	5.78323	0.0001	0.0001	0.0001	0.0001	31609.5	14.9481	0.0578738	0.958328	up	no
211514	u	chr6.2	-	49620437	49620972	MSTRG.111240.1	2	410	MSTRG.111240	.	0.0001	0.0001	0.0001	3.02324	0.0001	2.06529	5.8955e-05	-14.05	0.0579476	0.958669	down	no
10088	j	57641	-	47057	48108	MSTRG.5212.1	5	586	MSTRG.5212	MS.gene017520	0.0001	0.0001	0.0001	1.54979	0.0001	2.02424	8.39365e-05	-13.5403	0.057974	0.958669	down	no
85943	o	chr3.1	+	10529450	10628119	MSTRG.45139.1	2	1020	MSTRG.45139	MS.gene97375	21.2689	11.8735	23.8974	2.82029	7.88474	1.24449	4.7734	2.25502	0.0580198	0.958669	up	no
61592	u	chr2.2	-	10874173	10874443	MSTRG.32400.1	1	271	MSTRG.32400	.	5.31265	3.31926	0.0001	0.0001	0.0001	0.0001	28773.3	14.8124	0.0580534	0.958669	up	no
180935	u	chr5.2	.	52153010	52153881	MSTRG.95239.1	1	872	MSTRG.95239	.	0.0001	0.0001	0.0001	1.48746	0.0001	0.923097	0.000124447	-12.9722	0.0580797	0.958669	down	no
226408	j	chr7.1	+	2927266	2929319	MSTRG.119302.2	4	1357	MSTRG.119302	MS.gene78602	2.70917	5.50317	0.172324	0.0001	0.434615	0.0001	19.2833	4.26928	0.0581078	0.958669	up	no
16691	u	chr1.1	.	53408456	53408962	MSTRG.8579.1	1	507	MSTRG.8579	.	0.278805	2.65925	4.01129	0.0001	0.173402	0.0001	40.0303	5.32302	0.0581081	0.958669	up	no
265442	u	chr8.1	.	15119576	15120002	MSTRG.139782.1	1	427	MSTRG.139782	.	5.79982	3.39498	4.39532	0.883423	0.0001	0.0001	15.38	3.94298	0.0581102	0.958669	up	no
153875	u	chr4.3	.	58299309	58300225	MSTRG.81133.1	1	917	MSTRG.81133	.	0.18487	0.832035	0.0001	3.53129	3.66551	2.82876	0.101441	-3.30128	0.058113	0.958669	down	no
289168	i	chr8.3	.	52833343	52833778	MSTRG.152260.1	1	436	MSTRG.152260	MS.gene36088	0.0001	0.0001	0.0001	0.0001	1.79802	3.28719	5.89934e-05	-14.0491	0.0581774	0.959225	down	no
172955	u	chr5.1	.	56723103	56723419	MSTRG.91036.1	1	317	MSTRG.91036	.	4.18375	11.1643	7.607	0.0001	1.41627	0.0001	16.2058	4.01844	0.0583759	0.961462	up	no
271115	u	chr8.1	.	68795713	68796177	MSTRG.142815.1	1	465	MSTRG.142815	.	0.0001	0.0001	0.0001	0.0001	2.3704	2.4025	6.28536e-05	-13.9576	0.0583851	0.961462	down	no
87870	o	chr3.1	-	35735819	35929473	MSTRG.46210.4	3	740	MSTRG.46210	MS.gene76187	0.0001	11.7406	3.69783	0.641233	0.0001	0.193872	18.4847	4.20826	0.0585007	0.962687	up	no
241238	u	chr7.2	.	51769027	51769686	MSTRG.127115.1	1	660	MSTRG.127115	.	0.0001	1.45948	1.7061	0.0001	0.0001	0.0001	10552.3	13.3653	0.0585516	0.96289	up	no
203992	i	chr6.1	.	31356870	31357202	MSTRG.107151.1	1	333	MSTRG.107151	MS.gene83952	0.0001	3.61535	2.67013	0.0001	0.0001	0.0001	20951.9	14.3548	0.0585542	0.96289	up	no
179537	u	chr5.2	.	29610029	29610451	MSTRG.94536.1	1	423	MSTRG.94536	.	2.65725	0.0001	2.5513	0.0001	0.0001	0.0001	17362.2	14.0837	0.0585811	0.96289	up	no
136683	i	chr4.2	.	4102231	4102549	MSTRG.72105.1	1	319	MSTRG.72105	MS.gene06103	0.0001	4.02102	2.62099	0.0001	0.0001	0.0001	22140.4	14.4344	0.0585964	0.96289	up	no
106172	u	chr3.3	+	10767600	10768462	MSTRG.55831.1	2	265	MSTRG.55831	.	0.0001	0.0001	0.0001	0.0001	3.83681	4.52234	3.58884e-05	-14.7661	0.0586033	0.96289	down	no
262252	u	chr7.4	.	82577280	82577543	MSTRG.138098.1	1	264	MSTRG.138098	.	0.0001	0.0001	0.0001	0.0001	3.86977	4.57489	3.5525e-05	-14.7808	0.0586076	0.96289	down	no
190844	i	chr5.3	.	62485645	62485974	MSTRG.100352.1	1	330	MSTRG.100352	MS.gene009538	0.0001	0.0001	0.0001	3.00871	0.0001	3.20011	4.83176e-05	-14.3371	0.0587067	0.963027	down	no
44097	u	chr1.4	.	21639729	21640106	MSTRG.23381.1	1	378	MSTRG.23381	.	0.0001	0.0001	8.71808	64.905	25.159	31.0731	0.0719703	-3.79645	0.0587211	0.96309	down	no
69930	i	chr2.3	.	14078207	14078561	MSTRG.36789.1	1	355	MSTRG.36789	MS.gene073174	3.77726	7.58295	3.71396	0.88228	0.0001	0.0001	17.0816	4.09437	0.0587899	0.963365	up	no
253075	i	chr7.3	.	81828849	81829350	MSTRG.133360.1	1	502	MSTRG.133360	MS.gene056315	0.0001	0.0001	0.0001	0.0001	2.62071	1.81787	6.75877e-05	-13.8529	0.0588035	0.963365	down	no
164397	u	chr4.4	.	61338853	61339179	MSTRG.86722.1	1	327	MSTRG.86722	.	0.0001	0.0001	0.510505	1.72425	2.69916	9.36787	0.037031	-4.75512	0.0588097	0.963365	down	no
42879	j	chr1.4	+	10329258	10330735	MSTRG.22704.2	2	603	MSTRG.22704	MS.gene021544	0.055907	0.0001	0.0001	2.28856	0.0001	3.05062	0.0105083	-6.57232	0.0589655	0.964733	down	no
116184	u	chr3.4	.	7574983	7575409	MSTRG.61106.1	1	427	MSTRG.61106	.	1.96115	3.4684	0.0001	0.0001	0.0001	0.0001	18098.8	14.1436	0.0590878	0.965563	up	no
253227	x	chr7.3	-	83033409	83041320	MSTRG.133448.1	2	209	MSTRG.133448	MS.gene44661	0.0001	0.0001	0.0001	4.33885	6.94176	0.0001	2.65941e-05	-15.1985	0.0590968	0.965563	down	no
218666	i	chr6.3	.	53457742	53458357	MSTRG.115113.1	1	616	MSTRG.115113	MS.gene34554	6.10247	25.7763	24.0774	1.75757	6.26798	3.14909	5.00743	2.32407	0.0591399	0.965903	up	no
131203	u	chr4.1	+	35524847	35526242	MSTRG.69202.1	3	1117	MSTRG.69202	.	4.13745	8.71018	5.57	0.574182	2.04377	0.757753	5.45593	2.44783	0.0592258	0.966777	up	no
216997	o	chr6.3	+	25529402	25756127	MSTRG.114289.1	2	799	MSTRG.114289	MS.gene74806	1.13299	14.7356	5.04076	0.636758	1.82543	0.647197	6.72458	2.74944	0.0592352	0.966777	up	no
18114	u	chr1.1	.	63744487	63744732	MSTRG.9348.1	1	246	MSTRG.9348	.	0.0001	4.27266	4.05419	0.0001	0.0001	0.0001	27756.5	14.7605	0.0593229	0.967549	up	no
1248	u	15127	+	9724	10779	MSTRG.496.1	1	1056	MSTRG.496	.	5.8294	5.19127	2.30346	0.083419	0.880088	0.903741	7.13571	2.83506	0.059355	0.967549	up	no
258124	u	chr7.4	.	28741414	28741914	MSTRG.135990.1	1	501	MSTRG.135990	.	1.26519	3.24108	5.25575	0.181299	0.479966	0.0001	14.7604	3.88366	0.0593747	0.967549	up	no
52198	i	chr2.1	.	4116421	4116792	MSTRG.27565.1	1	372	MSTRG.27565	MS.gene069884	2.08551	4.05329	0.0001	0.0001	0.0001	0.0001	20463	14.3207	0.0593848	0.967549	up	no
208672	u	chr6.2	.	10383056	10383388	MSTRG.109719.1	1	333	MSTRG.109719	.	0.0001	0.0001	0.0001	3.71525	3.26411	0.0001	4.29833e-05	-14.5059	0.0594022	0.967549	down	no
31840	j	chr1.3	-	990032	990720	MSTRG.16677.3	2	333	MSTRG.16677	MS.gene64062	0.0001	0.0001	0.0001	3.60707	3.32046	0.0001	4.33048e-05	-14.4951	0.0594255	0.967549	down	no
70169	u	chr2.3	.	16651382	16652069	MSTRG.36902.1	1	688	MSTRG.36902	.	0.0001	1.30233	0.0001	3.34361	7.13859	6.69459	0.0758306	-3.72108	0.0594376	0.967549	down	no
190838	i	chr5.3	.	62432866	62433360	MSTRG.100349.1	1	495	MSTRG.100349	MS.gene009542	1.90666	1.36567	1.93031	0.109149	0.0001	0.0001	47.5784	5.57223	0.0594418	0.967549	up	no
219521	o	chr6.3	+	67194346	67210954	MSTRG.115620.4	4	658	MSTRG.115620	MS.gene81839	0.0001	0.0001	0.152364	1.62431	0.0001	5.36497	0.021828	-5.51768	0.0595354	0.968036	down	no
49387	j	chr1.4	-	73438316	73442509	MSTRG.26035.3	4	993	MSTRG.26035	MS.gene60870	0.0001	0.168016	0.0001	0.887996	3.64372	0.131739	0.0360711	-4.79301	0.0595714	0.968036	down	no
25616	i	chr1.2	-	42975978	42976692	MSTRG.13413.1	2	647	MSTRG.13413	MS.gene39207	2.83145	7.49001	3.26297	1.07923	0.0001	0.251194	10.2098	3.35189	0.0595876	0.968036	up	no
204627	i	chr6.1	.	44350666	44350970	MSTRG.107451.1	1	305	MSTRG.107451	MS.gene021252	0.0001	0.0001	0.0001	0.0001	3.03285	4.18979	4.15355e-05	-14.5553	0.0596137	0.968036	down	no
88147	u	chr3.1	+	38284208	38284571	MSTRG.46283.1	1	364	MSTRG.46283	.	0.0001	0.0001	0.0001	0.0001	3.15032	2.91107	4.94928e-05	-14.3024	0.0596154	0.968036	down	no
248729	u	chr7.3	+	29206917	29208616	MSTRG.131112.1	2	610	MSTRG.131112	.	1.85464	1.85868	0.0001	0.0001	0.0001	0.0001	12378	13.5955	0.0596624	0.968036	up	no
243898	i	chr7.2	.	86672729	86674500	MSTRG.128541.1	1	1772	MSTRG.128541	MS.gene045030	0.255099	0.119367	0.0001	2.35021	0.717727	1.17257	0.0883304	-3.50095	0.0596961	0.968216	down	no
135442	u	chr4.1	.	84281430	84281808	MSTRG.71447.1	1	379	MSTRG.71447	.	0.0001	0.0001	0.0001	0.0001	3.4639	2.34174	5.1673e-05	-14.2402	0.0597561	0.968862	down	no
243456	o	chr7.2	-	82098194	82125557	MSTRG.128305.1	2	525	MSTRG.128305	MS.gene48529	5.47327	2.72851	0.0001	4.3194	27.2313	31.283	0.130533	-2.93751	0.0597567	0.968862	down	no
54980	x	chr2.1	+	28219447	28288123	MSTRG.28971.1	2	287	MSTRG.28971	MS.gene039185	2.30363	7.05806	5.74735	0.714816	0.0001	0.0001	21.1311	4.40129	0.0598745	0.970268	up	no
208896	u	chr6.2	.	12343905	12344191	MSTRG.109864.1	1	287	MSTRG.109864	.	0.0001	0.552748	0.0001	1.79795	9.54326	3.28993	0.0377925	-4.72576	0.0599197	0.970496	down	no
190868	u	chr5.3	.	62736781	62737199	MSTRG.100362.1	1	419	MSTRG.100362	.	0.0001	0.0001	0.0001	0.0001	1.93234	3.26223	5.77514e-05	-14.0798	0.0600159	0.971025	down	no
63398	i	chr2.2	-	28211417	28211898	MSTRG.33353.1	1	482	MSTRG.33353	MS.gene90765	0.927182	8.16681	7.39558	0.682167	1.06242	0.198247	8.4874	3.08532	0.0600337	0.971025	up	no
281555	u	chr8.2	-	73858752	73862864	MSTRG.148183.1	7	799	MSTRG.148183	.	5.97121	1.61492	0.703086	0.0001	0.421769	0.0001	19.6441	4.29603	0.0600621	0.971025	up	no
222622	i	chr6.4	.	18118133	18118471	MSTRG.117254.1	1	339	MSTRG.117254	MS.gene41973	0.0001	3.37712	2.62818	0.0001	0.0001	0.0001	20018	14.289	0.0601973	0.972106	up	no
264448	i	chr8.1	+	7856439	7856674	MSTRG.139299.1	1	236	MSTRG.139299	MS.gene68605	0.626163	1.89496	1.74734	0.874542	18.4965	18.8191	0.111769	-3.16141	0.0602609	0.972255	down	no
20039	u	chr1.1	+	75956739	75957865	MSTRG.10424.1	2	494	MSTRG.10424	.	0.0001	1.87861	2.27836	0.0001	0.0001	0.0001	13856.9	13.7583	0.0603517	0.973277	up	no
292749	u	chr8.4	.	985680	986706	MSTRG.154015.1	1	1027	MSTRG.154015	.	1.319	1.8219	2.17803	0.191372	0.248127	0.22372	8.01987	3.00358	0.0604019	0.97392	up	no
165108	u	chr4.4	.	71378613	71378960	MSTRG.87065.1	1	348	MSTRG.87065	.	0.0001	0.0001	0.0001	0.0001	2.89974	3.27309	4.85993e-05	-14.3287	0.0605152	0.974944	down	no
204216	u	chr6.1	.	36549219	36549661	MSTRG.107262.1	1	443	MSTRG.107262	.	0.0001	0.0001	0.0001	0.0001	2.24574	2.60297	6.18708e-05	-13.9804	0.060528	0.974944	down	no
165328	u	chr4.4	+	73818089	73819992	MSTRG.87155.1	1	1904	MSTRG.87155	.	0.152388	0.49644	0.390237	0.509027	4.70809	1.88355	0.146334	-2.77267	0.0606175	0.975372	down	no
218164	u	chr6.3	+	44050207	44051959	MSTRG.114833.1	1	1753	MSTRG.114833	.	3.26243	2.67177	2.0323	0.723057	0.365304	0.289209	5.78301	2.53182	0.0606337	0.975372	up	no
28529	i	chr1.2	.	65633099	65633705	MSTRG.14890.1	1	607	MSTRG.14890	MS.gene20787	0.0001	0.0001	0.0001	0.0001	1.85023	1.7208	8.4007e-05	-13.5391	0.0606425	0.975372	down	no
93192	i	chr3.1	.	78264809	78265432	MSTRG.48983.1	1	624	MSTRG.48983	MS.gene06276	0.0001	0.728184	0.1061	0.0001	8.41995	8.37308	0.049686	-4.33102	0.0607521	0.975813	down	no
132801	i	chr4.1	.	54084457	54084940	MSTRG.70077.1	1	484	MSTRG.70077	MS.gene95755	1.94416	2.58155	0.0001	0.0001	0.0001	0.0001	15086	13.8809	0.0607778	0.975813	up	no
22186	u	chr1.2	.	7175471	7175970	MSTRG.11571.1	1	500	MSTRG.11571	.	0.0001	0.0001	0.0001	2.87057	1.76386	0.0001	6.47316e-05	-13.9152	0.0607881	0.975813	down	no
161237	i	chr4.4	.	30113127	30113441	MSTRG.85025.1	1	315	MSTRG.85025	MS.gene56484	0.78034	0.0001	1.27009	12.4314	4.71262	7.15586	0.0843841	-3.56689	0.0608053	0.975813	down	no
274916	u	chr8.2	.	11629085	11629344	MSTRG.144739.1	1	260	MSTRG.144739	.	4.30357	0.0001	3.84689	0.0001	0.0001	0.0001	27168.5	14.7296	0.0608143	0.975813	up	no
153848	u	chr4.3	.	58033853	58034375	MSTRG.81120.1	1	523	MSTRG.81120	.	0.0001	0.0001	0.0001	0.0001	1.94342	2.13262	7.3599e-05	-13.73	0.0608234	0.975813	down	no
220146	u	chr6.3	-	73611024	73611517	MSTRG.115918.1	1	494	MSTRG.115918	.	0.339755	0.367007	0.204861	2.30073	3.81957	3.07011	0.0991928	-3.33362	0.0608375	0.975813	down	no
252394	u	chr7.3	.	74811332	74811729	MSTRG.132992.1	1	398	MSTRG.132992	.	2.73212	0.0001	2.59991	0.0001	0.0001	0.0001	17773.8	14.1175	0.0608407	0.975813	up	no
82711	i	chr2.4	.	60551246	60551903	MSTRG.43389.1	1	658	MSTRG.43389	MS.gene003251	1.9255	1.44234	0.0001	0.0001	0.0001	0.0001	11226.5	13.4546	0.0608461	0.975813	up	no
300092	u	chr8.4	+	69082361	69084080	MSTRG.157854.3	2	475	MSTRG.157854	.	4.05596	11.3045	7.79745	0.232434	2.05639	0.0001	10.1174	3.33876	0.060851	0.975813	up	no
65833	u	chr2.2	.	58495031	58495629	MSTRG.34558.1	1	599	MSTRG.34558	.	2.15167	1.6048	0.0001	0.0001	0.0001	0.0001	12521.9	13.6122	0.0608533	0.975813	up	no
51228	u	chr1.4	.	85983844	85984272	MSTRG.27019.1	1	429	MSTRG.27019	.	0.0001	0.0001	0.0001	0.0001	3.04276	1.98409	5.96783e-05	-14.0324	0.0609009	0.975927	down	no
240361	u	chr7.2	.	41438275	41438518	MSTRG.126631.1	1	244	MSTRG.126631	.	5.67855	0.0001	3.27932	0.0001	0.0001	0.0001	29859.9	14.8659	0.0609046	0.975927	up	no
211082	u	chr6.2	-	41212208	41217902	MSTRG.110949.1	2	334	MSTRG.110949	.	0.0001	0.0674	0.0001	2.38189	4.50072	0.142103	0.00962316	-6.69927	0.0609126	0.975927	down	no
86301	u	chr3.1	.	14128395	14128649	MSTRG.45305.1	1	255	MSTRG.45305	.	0.0001	0.0001	0.0001	0.0001	3.45537	5.0186	3.54021e-05	-14.7858	0.0609511	0.976	down	no
62170	u	chr2.2	.	15120321	15120846	MSTRG.32714.1	1	526	MSTRG.32714	.	0.0001	0.0001	0.0001	0.0001	1.59475	2.44106	7.43326e-05	-13.7156	0.0609589	0.976	down	no
60122	u	chr2.2	.	568856	569448	MSTRG.31596.1	1	593	MSTRG.31596	.	1.11206	0.0001	0.224889	2.75577	2.93931	8.5052	0.0941568	-3.40879	0.0610091	0.976177	down	no
218607	u	chr6.3	.	52682630	52683117	MSTRG.115090.1	1	488	MSTRG.115090	.	0.786045	0.0001	0.0001	0.880099	8.56691	4.21749	0.0575393	-4.11931	0.0610198	0.976177	down	no
99169	u	chr3.2	+	50124292	50128249	MSTRG.52158.4	2	612	MSTRG.52158	.	2.65551	10.5319	2.30901	1.10149	0.0001	0.0001	14.0661	3.81415	0.0610303	0.976177	up	no
188141	u	chr5.3	.	28217267	28217503	MSTRG.98988.1	1	237	MSTRG.98988	.	5.89398	3.57949	0.0001	0.0001	0.0001	0.0001	31578.6	14.9467	0.0610903	0.976766	up	no
268632	u	chr8.1	.	40265815	40266984	MSTRG.141540.1	1	1170	MSTRG.141540	.	0.0001	1.06482	0.691976	0.0001	0.0001	0.0001	5856.33	12.5158	0.0612276	0.978124	up	no
60645	i	chr2.2	.	3972810	3973609	MSTRG.31881.1	1	800	MSTRG.31881	MS.gene052020	2.89255	3.14657	1.63731	0.48107	0.0001	0.0001	15.9504	3.99552	0.0613717	0.980093	up	no
98162	u	chr3.2	.	37446889	37447628	MSTRG.51645.1	1	740	MSTRG.51645	.	1.34518	1.64355	0.0001	0.0001	0.0001	0.0001	9962.76	13.2823	0.0615585	0.981193	up	no
33350	i	chr1.3	.	11817902	11818253	MSTRG.17512.1	1	352	MSTRG.17512	MS.gene56562	3.32249	2.84696	0.0001	0.0001	0.0001	0.0001	20565.2	14.3279	0.0615666	0.981193	up	no
46399	i	chr1.4	.	50022179	50022404	MSTRG.24480.1	1	226	MSTRG.24480	MS.gene72295	0.0001	0.0001	0.0001	0.0001	4.76953	4.58323	3.20758e-05	-14.9282	0.061743	0.982152	down	no
74860	u	chr2.3	.	65359498	65359787	MSTRG.39312.1	1	290	MSTRG.39312	.	0.0001	0.0001	0.190792	1.32034	4.91159	3.04016	0.0205986	-5.60131	0.0617631	0.982152	down	no
116632	u	chr3.4	.	12422190	12422485	MSTRG.61409.1	1	296	MSTRG.61409	.	0.241287	1.0604	0.0001	2.61096	6.37691	8.51774	0.0743639	-3.74925	0.0618617	0.982463	down	no
143083	i	chr4.2	.	51521378	51521614	MSTRG.75540.1	1	237	MSTRG.75540	MS.gene061293	3.54091	5.75465	0.0001	0.0001	0.0001	0.0001	30985.5	14.9193	0.0619486	0.983006	up	no
170280	u	chr5.1	-	24748749	24751669	MSTRG.89732.1	3	645	MSTRG.89732	.	0.0001	1.7322	1.35271	0.0001	0.0001	0.0001	10283.4	13.328	0.062056	0.98368	up	no
85615	u	chr3.1	.	7154168	7154546	MSTRG.44944.1	1	379	MSTRG.44944	.	0.0001	0.0001	0.0001	0.0001	2.09411	3.44478	5.41615e-05	-14.1724	0.0620618	0.98368	down	no
57181	i	chr2.1	.	55323766	55324158	MSTRG.30032.1	1	393	MSTRG.30032	MS.gene041368	0.0001	2.8189	2.18763	0.0001	0.0001	0.0001	16688.8	14.0266	0.0620687	0.98368	up	no
236808	u	chr7.2	.	12549298	12549839	MSTRG.124735.1	1	542	MSTRG.124735	.	0.0001	0.0001	0.0001	1.56081	0.0001	1.9944	8.43808e-05	-13.5327	0.0621882	0.984722	down	no
119871	u	chr3.4	.	56336902	56337453	MSTRG.63026.1	1	552	MSTRG.63026	.	0.0001	1.78426	1.76992	0.0001	0.0001	0.0001	11847.6	13.5323	0.0623488	0.986086	up	no
219898	u	chr6.3	.	71215706	71215914	MSTRG.115790.1	1	209	MSTRG.115790	.	0.0001	4.63645	4.61364	0.0001	0.0001	0.0001	30834	14.9122	0.0623587	0.986086	up	no
188504	u	chr5.3	+	32586610	32587448	MSTRG.99172.1	2	539	MSTRG.99172	.	0.0001	0.00039	0.0001	0.0001	3.07199	2.70826	0.00010207	-13.2582	0.0623717	0.986124	down	no
9529	u	57185	.	102863	103161	MSTRG.4987.1	1	299	MSTRG.4987	.	0.0001	0.0001	0.0001	3.75406	3.51557	0.0001	4.1267e-05	-14.5647	0.0624803	0.987068	down	no
22511	j	chr1.2	-	9407670	9411048	MSTRG.11797.2	4	388	MSTRG.11797	MS.gene015962	0.0001	0.0001	0.0001	0.0001	2.75677	2.61711	5.58245e-05	-14.1287	0.0625954	0.987775	down	no
220437	i	chr6.3	.	76395553	76395850	MSTRG.116121.1	1	298	MSTRG.116121	MS.gene51250	0.0001	0.0001	0.0001	0.0001	3.23002	3.73438	4.30756e-05	-14.5028	0.0626029	0.987775	down	no
12849	u	chr1.1	.	12971407	12971622	MSTRG.6617.1	1	216	MSTRG.6617	.	5.94899	4.1863	0.0001	0.0001	0.0001	0.0001	33784.6	15.0441	0.0627114	0.988419	up	no
223571	u	chr6.4	.	36314862	36315222	MSTRG.117730.1	1	361	MSTRG.117730	.	0.0001	0.0001	0.0001	0.0001	3.37479	2.40239	5.19275e-05	-14.2331	0.0627303	0.988419	down	no
7154	i	43118	.	119295	119533	MSTRG.3896.1	1	239	MSTRG.3896	MS.gene44595	5.47859	3.54005	0.0001	0.0001	0.0001	0.0001	30062.5	14.8757	0.0628435	0.988902	up	no
278918	i	chr8.2	.	45718237	45719031	MSTRG.146814.1	1	795	MSTRG.146814	MS.gene071294	1.24201	2.38386	6.48325	0.716048	0.0001	0.0001	14.114	3.81905	0.0629452	0.989836	up	no
207036	u	chr6.1	.	75886594	75887035	MSTRG.108874.1	1	442	MSTRG.108874	.	0.0001	0.0001	0.0001	1.99653	0.0001	2.29241	6.99456e-05	-13.8034	0.063068	0.990596	down	no
233535	u	chr7.1	-	72518688	72521019	MSTRG.123044.1	3	433	MSTRG.123044	.	3.34004	5.57574	4.66433	0.995389	0.171338	0.0001	11.6385	3.54083	0.0631895	0.99151	up	no
98676	u	chr3.2	.	44799919	44800138	MSTRG.51908.1	1	220	MSTRG.51908	.	0.0001	5.05103	3.7166	0.0001	0.0001	0.0001	29225.8	14.835	0.0632768	0.992213	up	no
73074	u	chr2.3	.	50450168	50450653	MSTRG.38377.1	1	486	MSTRG.38377	.	0.0001	2.19321	1.82166	0.0001	0.0001	0.0001	13383.2	13.7081	0.0633443	0.992528	up	no
11581	j	chr1.1	+	3134808	3136830	MSTRG.5949.2	2	623	MSTRG.5949	MS.gene24362	1.81705	0.0001	1.49633	0.0001	0.0001	0.0001	11044.9	13.4311	0.0633909	0.992528	up	no
164328	u	chr4.4	.	60012956	60013287	MSTRG.86686.1	1	332	MSTRG.86686	.	1.17422	10.205	22.3547	0.488211	2.64595	0.0001	10.763	3.42801	0.0634681	0.992528	up	no
118990	o	chr3.4	+	46969344	47215921	MSTRG.62539.2	2	306	MSTRG.62539	MS.gene027174	42.6762	24.2802	9.88177	4.71029	5.05763	0.0001	7.8663	2.97569	0.0634914	0.992528	up	no
233581	u	chr7.1	.	73191140	73191617	MSTRG.123061.1	1	478	MSTRG.123061	.	0.0001	0.0001	0.0001	2.06404	2.40044	0.0001	6.71956e-05	-13.8613	0.0635031	0.992528	down	no
144637	u	chr4.2	.	74551991	74552284	MSTRG.76281.1	1	294	MSTRG.76281	.	3.99617	3.2508	0.0001	0.0001	0.0001	0.0001	24156.9	14.5601	0.063519	0.992528	up	no
189240	i	chr5.3	.	47192529	47192994	MSTRG.99545.1	1	466	MSTRG.99545	MS.gene036000	2.15634	2.41297	0.0001	0.0001	0.0001	0.0001	15231.4	13.8948	0.0635286	0.992528	up	no
211139	i	chr6.2	.	42093850	42094053	MSTRG.110986.1	1	204	MSTRG.110986	MS.gene30720	0.0001	0.0001	0.0001	0.0001	4.55484	5.50976	2.98071e-05	-15.034	0.0636222	0.992962	down	no
130557	u	chr4.1	.	30864531	30865027	MSTRG.68862.1	1	497	MSTRG.68862	.	0.915934	5.3459	4.45634	0.0001	0.0001	0.595701	17.9865	4.16884	0.0637171	0.993453	up	no
177337	u	chr5.2	+	11420131	11420502	MSTRG.93406.1	2	282	MSTRG.93406	.	13.0854	11.322	3.57613	1.96728	0.0001	0.0001	14.223	3.83016	0.0637957	0.993957	up	no
118960	u	chr3.4	.	46474074	46474396	MSTRG.62507.1	1	323	MSTRG.62507	.	0.607152	3.17722	4.45819	0.246059	0.0001	0.0001	33.4711	5.06484	0.0638052	0.993957	up	no
127161	u	chr4.1	+	8485508	8485974	MSTRG.66956.1	2	350	MSTRG.66956	.	0.0001	0.0001	0.0001	2.46951	3.60992	0.0001	4.93459e-05	-14.3067	0.0638138	0.993957	down	no
14999	o	chr1.1	-	35529193	35529978	MSTRG.7737.2	2	635	MSTRG.7737	MS.gene073669	0.784915	5.72493	1.67434	0.438656	0.0001	0.0001	18.6489	4.22102	0.0638886	0.994482	up	no
44032	u	chr1.4	.	20859430	20860089	MSTRG.23286.1	1	660	MSTRG.23286	.	0.0001	0.0001	0.0001	1.30267	0.0001	1.52487	0.000106096	-13.2023	0.063986	0.995583	down	no
23213	u	chr1.2	.	15544184	15544412	MSTRG.12151.1	1	229	MSTRG.12151	.	4.2234	1.38879	5.76778	0.331674	0.0001	0.0001	34.29	5.09972	0.064018	0.995654	up	no
218762	j	chr6.3	-	55192450	55196926	MSTRG.115179.1	5	1851	MSTRG.115179	MS.gene021357	5.03406	1.39564	7.03686	0.0001	1.0802	0.0001	12.4644	3.63974	0.064057	0.995929	up	no
26641	u	chr1.2	-	51948132	51948859	MSTRG.13872.1	1	728	MSTRG.13872	.	2.16323	1.7713	3.49276	0.427544	0.202384	0.27955	8.16654	3.02972	0.0641222	0.996612	up	no
7383	u	43357	.	55068	56374	MSTRG.4009.1	1	1307	MSTRG.4009	.	0.337159	0.0001	0.0001	0.762554	1.53626	2.67065	0.0678864	-3.88073	0.0641576	0.996997	down	no
235303	o	chr7.2	-	2757429	2879039	MSTRG.124001.1	2	451	MSTRG.124001	MS.gene050503	7.48537	0.671851	0.758948	10.2434	6.56062	37.95	0.16284	-2.61847	0.0643069	0.998075	down	no
181181	u	chr5.2	.	55544153	55544589	MSTRG.95351.1	1	437	MSTRG.95351	.	2.68305	0.0001	1.97927	0.0001	0.0001	0.0001	15541.4	13.9238	0.0644557	0.998385	up	no
207394	u	chr6.1	+	79234082	79234654	MSTRG.109072.1	2	479	MSTRG.109072	.	0.0001	2.31516	1.69901	0.0001	0.0001	0.0001	13380.9	13.7079	0.0644779	0.998385	up	no
43087	u	chr1.4	-	12021966	12022897	MSTRG.22795.1	2	305	MSTRG.22795	.	0.0001	0.0001	0.0001	0.0001	3.6663	2.9658	4.52338e-05	-14.4322	0.064478	0.998385	down	no
164280	u	chr4.4	.	58637633	58637925	MSTRG.86651.1	1	293	MSTRG.86651	.	0.0001	0.0001	0.0001	0.0001	3.90422	3.11457	4.27418e-05	-14.514	0.0644783	0.998385	down	no
271225	u	chr8.1	.	69859045	69859503	MSTRG.142877.1	1	459	MSTRG.142877	.	0.0001	0.0001	0.0001	0.0001	2.5528	1.83189	6.84183e-05	-13.8353	0.0646087	0.999054	down	no
223790	i	chr6.4	.	41131886	41132393	MSTRG.117840.1	1	508	MSTRG.117840	MS.gene30475	0.0001	1.68607	1.98719	0.0001	0.0001	0.0001	12244.5	13.5799	0.0646134	0.999054	up	no
293796	u	chr8.4	.	9090377	9090650	MSTRG.154601.1	1	274	MSTRG.154601	.	4.26386	3.37392	0.0001	0.0001	0.0001	0.0001	25459.6	14.6359	0.0646629	0.999054	up	no
215322	u	chr6.3	.	8064461	8064662	MSTRG.113360.1	1	202	MSTRG.113360	.	5.81621	4.55404	0.0001	0.0001	0.0001	0.0001	34567.8	15.0771	0.0646704	0.999054	up	no
211638	u	chr6.2	-	52871148	52871972	MSTRG.111283.1	1	825	MSTRG.111283	.	0.195506	0.080487	0.0001	0.0001	3.24198	3.33142	0.0420009	-4.57343	0.064696	0.999054	down	no
257541	i	chr7.4	.	23741625	23741908	MSTRG.135646.1	1	284	MSTRG.135646	MS.gene033663	0.0001	0.0001	0.0001	3.30407	4.03896	0.0001	4.08545e-05	-14.5791	0.0647112	0.999124	down	no
157646	u	chr4.4	-	5763242	5766448	MSTRG.83091.1	6	276	MSTRG.83091	.	4.3497	3.25274	0.0001	0.0001	0.0001	0.0001	25341.8	14.6292	0.0648672	0.99988	up	no
95571	u	chr3.2	.	1794001	1794339	MSTRG.50266.1	1	339	MSTRG.50266	.	2.436	3.72474	0.0001	0.0001	0.0001	0.0001	20536.2	14.3259	0.064912	1	up	no
225497	u	chr6.4	.	60399667	60400274	MSTRG.118843.1	1	608	MSTRG.118843	.	0.0001	0.0001	0.0001	1.46431	0.0001	1.5447	9.96974e-05	-13.2921	0.0649954	1	down	no
169911	o	chr5.1	-	20931766	20946063	MSTRG.89551.1	2	1710	MSTRG.89551	MS.gene036278	3.76481	3.82069	2.02981	0.820733	0.0001	0.411054	7.80535	2.96446	0.0653408	1	up	no
90689	u	chr3.1	.	61208453	61208996	MSTRG.47608.1	1	544	MSTRG.47608	.	0.0001	0.0001	0.0001	0.0001	1.89139	1.82888	8.06372e-05	-13.5982	0.0653708	1	down	no
225412	u	chr6.4	.	59568329	59569618	MSTRG.118797.1	1	1290	MSTRG.118797	.	29.6724	13.2471	7.95726	1.25678	5.21504	0.0001	7.86116	2.97474	0.0654369	1	up	no
1866	u	20853	.	126142	126833	MSTRG.784.1	1	692	MSTRG.784	.	0.0001	1.32745	1.38352	0.0001	0.0001	0.0001	9036.89	13.1416	0.0654812	1	up	no
40052	i	chr1.3	.	71099577	71099944	MSTRG.21108.1	1	368	MSTRG.21108	MS.gene33574	0.0001	0.0001	0.0001	3.26402	2.47398	0.0001	5.22822e-05	-14.2233	0.0654985	1	down	no
144869	u	chr4.2	.	77219585	77220013	MSTRG.76405.1	1	429	MSTRG.76405	.	0.0001	2.1025	2.29618	0.0001	0.0001	0.0001	14662.6	13.8399	0.0655069	1	up	no
6001	u	41453	-	1134	5641	MSTRG.3247.1	2	301	MSTRG.3247	.	0.0001	0.0001	0.0001	0.0001	3.55127	3.0662	4.53339e-05	-14.429	0.0655273	1	down	no
58775	u	chr2.1	.	67811933	67812395	MSTRG.30856.1	1	463	MSTRG.30856	.	0.0001	0.314406	0.0001	2.99663	3.75634	1.88865	0.0364059	-4.77968	0.0655555	1	down	no
138399	u	chr4.2	.	15526158	15526737	MSTRG.73022.1	1	580	MSTRG.73022	.	1.07747	0.061215	0.390554	5.39814	3.16336	4.60364	0.116158	-3.10584	0.0656989	1	down	no
60213	i	chr2.2	.	1191408	1191618	MSTRG.31653.1	1	211	MSTRG.31653	MS.gene83579	0.0001	0.0001	1.80122	7.65938	10.3654	11.7463	0.0605091	-4.0467	0.0658036	1	down	no
129129	u	chr4.1	.	21530288	21530762	MSTRG.68046.1	1	475	MSTRG.68046	.	3.03915	10.0471	3.94054	4.54319	52.2596	29.4724	0.197355	-2.34114	0.0659897	1	down	no
166318	i	chr4.4	.	83671515	83671955	MSTRG.87648.1	1	441	MSTRG.87648	MS.gene89776	0.0001	0.0001	0.0001	2.12002	0.0001	1.96903	7.33648e-05	-13.7346	0.0660388	1	down	no
51503	i	chr1.4	.	87585810	87586187	MSTRG.27200.1	1	378	MSTRG.27200	MS.gene90850	2.14104	3.20355	0.0001	0.0001	0.0001	0.0001	17815.6	14.1209	0.0660963	1	up	no
38519	u	chr1.3	.	60941873	60942309	MSTRG.20265.1	1	437	MSTRG.20265	.	1.92036	2.75375	0.0001	0.0001	0.0001	0.0001	15580.7	13.9275	0.066104	1	up	no
201517	u	chr6.1	-	338701	342445	MSTRG.105924.1	2	3114	MSTRG.105924	.	1.77692	1.64252	0.298033	11.515	2.74392	3.46734	0.209716	-2.25349	0.0661849	1	down	no
141424	u	chr4.2	.	35756570	35757004	MSTRG.74641.1	1	435	MSTRG.74641	.	0.0001	0.0001	4.3837	12.9433	16.7999	25.9818	0.0786703	-3.66804	0.0661952	1	down	no
125973	o	chr4.1	+	957578	1019687	MSTRG.66333.4	2	1448	MSTRG.66333	MS.gene058529	2.97637	6.05673	4.61295	0.08097	0.875295	1.27459	6.11695	2.61281	0.0663599	1	up	no
224430	u	chr6.4	-	49631903	49632937	MSTRG.118193.1	1	1035	MSTRG.118193	.	0.63629	0.0001	0.0001	4.94478	1.77639	1.91593	0.0736926	-3.76234	0.0663827	1	down	no
85216	u	chr3.1	.	3393975	3394254	MSTRG.44722.1	1	280	MSTRG.44722	.	0.0001	3.80004	2.81716	0.0001	0.0001	0.0001	22057.7	14.429	0.0664575	1	up	no
143191	u	chr4.2	-	52369815	52370872	MSTRG.75596.1	2	424	MSTRG.75596	.	0.0001	2.50283	1.87712	0.0001	0.0001	0.0001	14600.1	13.8337	0.066459	1	up	no
232802	u	chr7.1	.	63652087	63653468	MSTRG.122664.1	1	1382	MSTRG.122664	.	1.02024	7.33225	1.64884	0.772542	0.0001	0.0001	12.9426	3.69406	0.0664802	1	up	no
296845	u	chr8.4	.	32901438	32901712	MSTRG.156195.1	1	275	MSTRG.156195	.	0.0001	0.0001	0.0001	4.00196	3.5305	0.0001	3.98271e-05	-14.6159	0.0665788	1	down	no
153235	u	chr4.3	.	49102467	49102800	MSTRG.80806.1	1	334	MSTRG.80806	.	0.0001	0.0001	0.0001	0.0001	2.41828	3.43773	5.12285e-05	-14.2527	0.0668188	1	down	no
23237	u	chr1.2	.	15737415	15737939	MSTRG.12210.1	1	525	MSTRG.12210	.	1.76854	0.0001	1.89963	0.0001	0.0001	0.0001	12227.6	13.5779	0.0668948	1	up	no
262650	u	chr7.4	.	87154566	87155375	MSTRG.138341.1	1	810	MSTRG.138341	.	4.50716	0.310096	1.076	0.0001	0.194766	0.0001	30.2271	4.91777	0.0669564	1	up	no
166051	u	chr4.4	.	80992343	80992679	MSTRG.87524.1	1	337	MSTRG.87524	.	0.0001	0.0001	0.0001	2.57329	3.48934	0.0001	4.94827e-05	-14.3027	0.0669584	1	down	no
138646	u	chr4.2	.	16990088	16990341	MSTRG.73152.1	1	254	MSTRG.73152	.	3.42108	4.53551	0.0001	0.0001	0.0001	0.0001	26522.3	14.6949	0.0669664	1	up	no
268738	u	chr8.1	-	41107521	41107936	MSTRG.141609.1	1	416	MSTRG.141609	.	0.0001	0.0001	0.0001	0.0001	2.73119	1.98969	6.3546e-05	-13.9418	0.0670129	1	down	no
212997	u	chr6.2	+	75351677	75352215	MSTRG.112063.1	1	539	MSTRG.112063	.	0.0001	0.0001	3.55424	18.8332	4.35039	24.9959	0.0737749	-3.76073	0.0670711	1	down	no
80973	u	chr2.4	+	42182967	42184571	MSTRG.42531.4	3	371	MSTRG.42531	.	49.758	29.7448	1.14979	0.0001	5.46812	0.0001	14.7491	3.88255	0.0670712	1	up	no
12187	x	chr1.1	+	7579322	7585856	MSTRG.6289.1	2	257	MSTRG.6289	MS.gene33127	4.36455	3.40321	0.0001	0.0001	0.0001	0.0001	25892.9	14.6603	0.0670735	1	up	no
212896	u	chr6.2	+	74470639	74471839	MSTRG.111979.2	3	696	MSTRG.111979	.	0.741953	3.95739	2.33243	0.318384	0.265076	0.161825	9.43501	3.23802	0.067093	1	up	no
170164	u	chr5.1	-	23468388	23470388	MSTRG.89678.1	2	539	MSTRG.89678	.	4.19001	6.83173	8.79567	0.0001	1.50823	0.0001	13.1378	3.71565	0.0670991	1	up	no
262934	u	chr7.4	.	90031174	90031517	MSTRG.138466.1	1	344	MSTRG.138466	.	2.32187	0.0001	3.38319	0.0001	0.0001	0.0001	19017.2	14.215	0.0671214	1	up	no
44025	i	chr1.4	.	20777523	20778131	MSTRG.23279.1	1	609	MSTRG.23279	MS.gene44559	0.826794	2.30906	3.20809	0.0001	0.0001	0.261554	24.2363	4.5991	0.0671713	1	up	no
34571	i	chr1.3	.	22718161	22718660	MSTRG.18221.1	1	500	MSTRG.18221	MS.gene91150	0.884032	3.3571	2.91404	0.272492	0.0001	0.0001	26.239	4.71364	0.0671756	1	up	no
104364	u	chr3.2	.	88056899	88058715	MSTRG.54863.1	1	1817	MSTRG.54863	.	0.554229	3.56809	2.05525	0.0001	0.200423	0.436491	9.69769	3.27764	0.0672177	1	up	no
257669	i	chr7.4	-	24728744	24728948	MSTRG.135715.2	1	205	MSTRG.135715	MS.gene033590	0.0001	0.0001	0.0001	4.85952	0.0001	3.90432	3.42312e-05	-14.8343	0.067264	1	down	no
76845	u	chr2.4	.	2878966	2879634	MSTRG.40389.1	1	669	MSTRG.40389	.	2.92516	0.0001	3.58295	0.0001	0.0001	0.149415	43.4997	5.44293	0.0674114	1	up	no
106113	u	chr3.3	.	10421600	10422491	MSTRG.55782.1	1	892	MSTRG.55782	.	0.975499	4.05334	5.44264	0.740156	0.465917	0.424058	6.4237	2.68341	0.0674279	1	up	no
143454	u	chr4.2	-	56129422	56137449	MSTRG.75727.1	2	509	MSTRG.75727	.	0.0001	0.537776	0.0001	2.25849	0.434376	7.42911	0.0531493	-4.23381	0.0674701	1	down	no
24354	u	chr1.2	.	26896198	26897599	MSTRG.12777.1	1	1402	MSTRG.12777	.	1.27398	1.32832	0.04756	0.0001	0.0001	0.071297	37.0625	5.21189	0.0675532	1	up	no
211830	u	chr6.2	-	55914453	55915273	MSTRG.111385.1	1	821	MSTRG.111385	.	1.14824	1.37041	5.73245	0.474678	0.492834	0.080803	7.87083	2.97652	0.0675588	1	up	no
234676	u	chr7.1	.	87093668	87093988	MSTRG.123632.1	1	321	MSTRG.123632	.	0.0001	0.0001	0.0001	0.0001	2.69115	3.29655	5.01019e-05	-14.2848	0.0678118	1	down	no
132351	i	chr4.1	+	47504127	47504692	MSTRG.69835.1	2	390	MSTRG.69835	MS.gene61634	4.42184	0.0001	3.19678	0.022085	0.0001	0.0001	341.877	8.41733	0.0678369	1	up	no
132635	u	chr4.1	+	51069842	51070292	MSTRG.69993.1	2	340	MSTRG.69993	.	0.0001	0.0001	0.0001	0.0001	3.00885	2.66933	5.28329e-05	-14.2082	0.0678379	1	down	no
14501	u	chr1.1	.	29977731	29977939	MSTRG.7473.1	1	209	MSTRG.7473	.	4.99206	0.0001	4.23125	0.0001	0.0001	0.0001	30744.7	14.9081	0.0678752	1	up	no
130543	u	chr4.1	.	30797569	30798067	MSTRG.68854.1	1	499	MSTRG.68854	.	2.01674	3.81363	4.17502	0.0001	0.0001	0.592593	16.8784	4.0771	0.0678981	1	up	no
98974	u	chr3.2	.	47844373	47844743	MSTRG.52057.1	1	371	MSTRG.52057	.	2.70476	0.0001	2.39639	0.0001	0.0001	0.0001	17004.2	14.0536	0.0679007	1	up	no
185558	u	chr5.3	+	6574112	6575529	MSTRG.97591.1	2	938	MSTRG.97591	.	0.0001	14.5611	17.5701	0.174052	2.23201	0.83604	9.91063	3.30898	0.0679628	1	up	no
145067	u	chr4.2	-	79396367	79397852	MSTRG.76511.1	2	219	MSTRG.76511	.	3.73139	0.0001	4.8694	0.0001	0.0001	0.0001	28669.6	14.8072	0.0681038	1	up	no
43086	u	chr1.4	.	12020647	12021703	MSTRG.22794.1	1	1057	MSTRG.22794	.	0.0001	0.277774	0.0001	0.0001	5.46384	2.41642	0.0352743	-4.82524	0.0681143	1	down	no
21347	u	chr1.2	.	1442190	1442640	MSTRG.11110.1	1	451	MSTRG.11110	.	1.11645	2.29725	1.86331	0.0001	0.0001	0.080523	65.3718	6.0306	0.0681198	1	up	no
15221	u	chr1.1	.	38692733	38693128	MSTRG.7837.1	1	396	MSTRG.7837	.	2.07785	3.99077	0.319449	21.331	10.0817	7.25481	0.165205	-2.59767	0.0681527	1	down	no
291400	u	chr8.3	.	73571480	73571827	MSTRG.153386.1	1	348	MSTRG.153386	.	3.51817	0.0001	0.0001	20.3486	11.7541	9.83269	0.0838999	-3.57519	0.0683339	1	down	no
223613	u	chr6.4	.	37170960	37171348	MSTRG.117754.1	1	389	MSTRG.117754	.	0.390153	0.0001	0.0001	4.83401	9.86192	0.0001	0.0265618	-5.2345	0.0686255	1	down	no
60683	u	chr2.2	+	4369380	4372012	MSTRG.31902.1	3	1401	MSTRG.31902	.	1.30717	1.84818	0.794925	0.0001	0.248526	0.0001	15.8821	3.98933	0.0688449	1	up	no
179640	u	chr5.2	.	30732002	30732257	MSTRG.94577.1	1	256	MSTRG.94577	.	3.92676	3.63215	0.0001	0.0001	0.0001	0.0001	25196.7	14.6209	0.0688652	1	up	no
15536	i	chr1.1	.	43174829	43175103	MSTRG.7972.1	1	275	MSTRG.7972	MS.gene034696	3.35678	3.63976	0.0001	0.0001	0.0001	0.0001	23322.2	14.5094	0.0688943	1	up	no
230686	u	chr7.1	+	34136755	34137515	MSTRG.121574.1	2	292	MSTRG.121574	.	0.0001	0.0001	0.0001	3.51824	3.23927	0.0001	4.43944e-05	-14.4593	0.068904	1	down	no
67546	j	chr2.2	-	71180873	71182621	MSTRG.35503.3	2	620	MSTRG.35503	MS.gene01245	1.74175	1.41148	0.0001	0.0001	0.0001	0.0001	10511.1	13.3596	0.0689157	1	up	no
252304	u	chr7.3	.	73574949	73575871	MSTRG.132933.1	1	923	MSTRG.132933	.	2.33216	2.9834	0.712175	0.358426	0.0001	0.0001	16.8079	4.07106	0.06892	1	up	no
255542	u	chr7.4	.	9973513	9973718	MSTRG.134568.1	1	206	MSTRG.134568	.	0.0001	0.0001	0.0001	0.0001	4.5781	4.42995	3.33032e-05	-14.874	0.0689276	1	down	no
21132	i	chr1.1	.	82303473	82303749	MSTRG.11004.1	1	277	MSTRG.11004	MS.gene74260	3.74294	3.26304	0.0001	0.0001	0.0001	0.0001	23353.6	14.5114	0.0689296	1	up	no
272462	u	chr8.1	.	81208206	81208946	MSTRG.143499.1	1	741	MSTRG.143499	.	0.0001	0.713624	0.0001	2.02307	3.31452	4.37104	0.0735247	-3.76563	0.0689382	1	down	no
247695	i	chr7.3	.	22202484	22202734	MSTRG.130512.1	1	251	MSTRG.130512	MS.gene055927	3.52836	4.21652	0.0001	0.0001	0.0001	0.0001	25816.6	14.656	0.0689632	1	up	no
29550	i	chr1.2	.	72671639	72672122	MSTRG.15422.1	1	484	MSTRG.15422	MS.gene54755	0.0001	0.0001	0.0001	0.0001	1.85907	1.96385	7.8472e-05	-13.6375	0.0689702	1	down	no
138301	u	chr4.2	-	14791725	14819122	MSTRG.72965.1	2	571	MSTRG.72965	.	3.3016	4.05089	1.22268	0.387878	0.171615	0.335004	9.58658	3.26102	0.0690205	1	up	no
236011	u	chr7.2	.	7021392	7021703	MSTRG.124330.1	1	312	MSTRG.124330	.	0.0001	0.0001	0.0001	2.80395	3.67203	0.0001	4.63243e-05	-14.3979	0.0690464	1	down	no
234090	o	chr7.1	-	80489167	80501074	MSTRG.123343.1	2	244	MSTRG.123343	MS.gene021974	0.0001	0.0001	1.23459	0.606522	4.97016	20.1082	0.0480747	-4.37858	0.0690868	1	down	no
87877	o	chr3.1	-	35758736	35966601	MSTRG.46210.6	3	451	MSTRG.46210	MS.gene82590	0.0001	0.016466	0.0001	0.08681	2.31908	1.92542	0.0038478	-8.02175	0.069461	1	down	no
238930	u	chr7.2	.	27939802	27940099	MSTRG.125865.1	1	298	MSTRG.125865	.	0.0001	2.78509	2.98342	0.0001	0.0001	0.0001	19228.7	14.231	0.069633	1	up	no
147353	u	chr4.3	.	4376507	4377320	MSTRG.77736.1	1	814	MSTRG.77736	.	4.0655	14.2555	5.01062	1.63555	2.07811	0.690634	5.29748	2.40531	0.0696335	1	up	no
180286	u	chr5.2	.	40309827	40310191	MSTRG.94898.1	1	365	MSTRG.94898	.	0.0001	2.27662	2.51805	0.0001	0.0001	0.0001	15982.6	13.9642	0.0696342	1	up	no
253325	i	chr7.3	.	83973516	83973736	MSTRG.133505.1	1	221	MSTRG.133505	MS.gene44613	0.0001	3.8506	3.90521	0.0001	0.0001	0.0001	25853	14.658	0.0696659	1	up	no
180230	i	chr5.2	.	38579304	38579520	MSTRG.94880.1	1	217	MSTRG.94880	MS.gene52562	30.9011	29.0063	22.9021	9.44139	0.903153	0.0001	8.00506	3.00091	0.0697474	1	up	no
90972	u	chr3.1	.	63132370	63132683	MSTRG.47734.1	1	314	MSTRG.47734	.	0.0001	0.0001	0.0001	0.0001	2.8503	2.99794	5.12966e-05	-14.2508	0.0698288	1	down	no
93006	j	chr3.1	-	77113005	77115175	MSTRG.48849.1	2	2071	MSTRG.48849	MS.gene06369	5.04208	0.0001	4.88783	0.489885	0.0001	0.0001	20.2618	4.34069	0.069868	1	up	no
132605	u	chr4.1	.	50867195	50867541	MSTRG.69973.1	1	347	MSTRG.69973	.	0.0001	0.0001	0.0001	0.0001	2.75188	2.49518	5.71738e-05	-14.0943	0.0698916	1	down	no
196291	u	chr5.4	.	24479523	24479885	MSTRG.103218.1	1	363	MSTRG.103218	.	0.0001	0.0001	0.0001	2.80206	2.58464	0.0001	5.56917e-05	-14.1322	0.0699192	1	down	no
4925	u	39972	-	19631	19914	MSTRG.2268.1	1	284	MSTRG.2268	.	10.0111	3.14671	4.93053	3.08798	32.2779	63.5682	0.182832	-2.45141	0.0699218	1	down	no
63399	i	chr2.2	-	28211417	28211898	MSTRG.33353.2	2	456	MSTRG.33353	MS.gene90765	0.946112	2.10145	6.69408	0.0001	0.0001	0.518248	18.79	4.23189	0.0699256	1	up	no
66133	u	chr2.2	.	60844018	60845295	MSTRG.34728.1	1	1278	MSTRG.34728	.	0.87553	0.837851	0.0001	4.13875	3.1091	5.29381	0.136623	-2.87173	0.0699762	1	down	no
213831	u	chr6.2	.	83911636	83911919	MSTRG.112563.1	1	284	MSTRG.112563	.	3.74289	0.0001	2.81745	0.0001	0.0001	0.0001	21868.1	14.4165	0.0699779	1	up	no
102591	i	chr3.2	.	76875682	76877369	MSTRG.53922.1	1	1688	MSTRG.53922	MS.gene06744	0.0001	0.0001	0.703468	2.89455	3.99346	2.35322	0.0761444	-3.71512	0.0700735	1	down	no
208330	u	chr6.2	+	6696395	6697310	MSTRG.109544.1	1	916	MSTRG.109544	.	1.16598	0.933007	2.03974	0.0001	0.119687	0.076839	21.0488	4.39566	0.0701922	1	up	no
12603	u	chr1.1	.	10799161	10800327	MSTRG.6499.1	1	1167	MSTRG.6499	.	2.70515	0.748161	1.26815	0.307741	0.0001	0.0001	15.3323	3.93851	0.0703161	1	up	no
265015	i	chr8.1	.	11442111	11442461	MSTRG.139594.1	1	351	MSTRG.139594	MS.gene060810	0.0001	0.286243	0.0001	0.503277	3.42936	5.05641	0.0318658	-4.97185	0.0709126	1	down	no
178852	u	chr5.2	.	23984796	23985140	MSTRG.94176.1	1	345	MSTRG.94176	.	0.0001	0.0001	0.0001	0.0001	2.6933	2.63054	5.63493e-05	-14.1152	0.0709323	1	down	no
238270	u	chr7.2	.	22848232	22848574	MSTRG.125533.1	1	343	MSTRG.125533	.	0.0001	0.0001	0.0001	2.57964	2.95417	0.0001	5.42112e-05	-14.171	0.0710075	1	down	no
198625	i	chr5.4	+	54899125	54900323	MSTRG.104397.1	1	1199	MSTRG.104397	MS.gene88761	0.05088	0.182712	0.0001	1.39119	0.172151	2.2238	0.0617067	-4.01843	0.0710398	1	down	no
152574	u	chr4.3	+	41178113	41188660	MSTRG.80473.1	2	660	MSTRG.80473	.	0.0001	0.0001	0.0001	1.26233	1.5974	0.0001	0.000104901	-13.2187	0.0711314	1	down	no
102188	i	chr3.2	.	74003809	74004219	MSTRG.53737.1	1	411	MSTRG.53737	MS.gene045160	1.98826	2.53615	0.0001	0.0001	0.0001	0.0001	15081.7	13.8805	0.0712031	1	up	no
149041	u	chr4.3	-	16489763	16491584	MSTRG.78614.1	1	1822	MSTRG.78614	.	41.7204	30.8315	48.3586	0.127252	5.72951	14.8563	5.8374	2.54533	0.0713318	1	up	no
187805	u	chr5.3	-	24851848	24852585	MSTRG.98794.1	2	655	MSTRG.98794	.	0.0001	0.0001	0.079293	3.30743	0.0001	2.48073	0.0137335	-6.18616	0.0715132	1	down	no
184613	x	chr5.3	-	113707	150257	MSTRG.97149.1	2	638	MSTRG.97149	MS.gene024992	2.68388	5.98003	3.62387	0.0001	0.921629	0.289023	10.1489	3.34325	0.0716057	1	up	no
233593	u	chr7.1	-	73269109	73269603	MSTRG.123067.1	1	495	MSTRG.123067	.	0.113023	0.441808	0.0001	0.0001	3.11407	9.19317	0.0450894	-4.47107	0.0716564	1	down	no
232685	u	chr7.1	-	62265458	62273099	MSTRG.122620.2	2	1386	MSTRG.122620	.	0.27904	0.303378	0.0001	1.88103	2.5839	0.935583	0.107863	-3.21272	0.071771	1	down	no
259036	o	chr7.4	-	37028226	37386809	MSTRG.136626.1	2	246	MSTRG.136626	MS.gene055020	0.0001	3.54373	3.23824	0.0001	0.0001	0.0001	22606.9	14.4645	0.0718545	1	up	no
165190	u	chr4.4	.	72495286	72495538	MSTRG.87088.1	1	253	MSTRG.87088	.	0.0001	3.36805	3.16267	0.0001	0.0001	0.0001	21769.4	14.41	0.0718712	1	up	no
198221	u	chr5.4	.	51009731	51009998	MSTRG.104173.1	1	268	MSTRG.104173	.	0.0001	0.0001	0.0001	3.76976	3.27781	0.0001	4.25672e-05	-14.5199	0.0720541	1	down	no
32799	u	chr1.3	.	7747342	7747543	MSTRG.17204.1	1	202	MSTRG.17204	.	4.6347	0.0001	4.36851	0.0001	0.0001	0.0001	30011	14.8732	0.07206	1	up	no
221683	u	chr6.4	.	4472897	4473196	MSTRG.116789.1	1	300	MSTRG.116789	.	0.0001	0.285802	0.0001	1.44207	4.40617	4.07924	0.0288091	-5.11733	0.0720603	1	down	no
271019	u	chr8.1	.	67797275	67797837	MSTRG.142762.1	1	563	MSTRG.142762	.	0.701946	0.0001	0.0001	5.40363	4.11433	1.12595	0.0659669	-3.92211	0.0720612	1	down	no
118371	u	chr3.4	.	37007137	37007427	MSTRG.62262.1	1	291	MSTRG.62262	.	0.0001	0.0001	0.0001	3.51015	2.88978	0.0001	4.68748e-05	-14.3808	0.0720708	1	down	no
47159	i	chr1.4	.	56875281	56875540	MSTRG.24932.1	1	260	MSTRG.24932	MS.gene79285	0.0001	0.0001	0.0001	3.39712	3.76893	0.0001	4.18635e-05	-14.5439	0.0720988	1	down	no
27892	u	chr1.2	+	61762647	61765434	MSTRG.14545.1	5	577	MSTRG.14545	.	0.0001	0.0001	0.0001	1.83986	1.4008	0.0001	9.25709e-05	-13.3991	0.0721044	1	down	no
212373	u	chr6.2	.	67509162	67509500	MSTRG.111673.1	1	339	MSTRG.111673	.	0.0001	0.0001	0.0001	0.0001	2.38671	2.80119	5.78257e-05	-14.0779	0.0721332	1	down	no
29852	u	chr1.2	-	74668253	74670524	MSTRG.15601.1	3	772	MSTRG.15601	.	0.647599	0.359782	0.077538	4.59736	2.09494	1.91298	0.126076	-2.98763	0.0721489	1	down	no
172163	i	chr5.1	.	49199801	49200452	MSTRG.90676.1	1	652	MSTRG.90676	MS.gene010196	0.0001	0.0001	0.0001	1.29211	1.52853	0.0001	0.000106355	-13.1988	0.0722795	1	down	no
291196	x	chr8.3	-	71890237	71899274	MSTRG.153314.1	2	288	MSTRG.153314	MS.gene07842	10.3609	0.011784	0.104447	204.293	0.053142	0.031275	0.0512637	-4.28592	0.0727514	1	down	no
56734	u	chr2.1	.	50608825	50609330	MSTRG.29826.1	1	506	MSTRG.29826	.	3.04347	3.28101	5.5141	0.0001	0.871472	0.184755	11.2073	3.48637	0.0728228	1	up	no
245263	x	chr7.3	-	4907112	4933787	MSTRG.129251.1	2	327	MSTRG.129251	MS.gene050856	2.27366	13.0628	10.6751	1.29993	1.94451	0.252914	7.4375	2.89482	0.0729321	1	up	no
250885	u	chr7.3	.	53606005	53606293	MSTRG.132258.1	1	289	MSTRG.132258	.	0.0001	0.0001	0.0001	0.0001	3.22721	2.95239	4.8546e-05	-14.3303	0.0731586	1	down	no
218784	u	chr6.3	.	55352521	55354095	MSTRG.115194.1	1	1575	MSTRG.115194	.	0.0001	0.458289	0.211681	2.47684	2.08648	1.28963	0.114484	-3.12678	0.0732095	1	down	no
212222	u	chr6.2	.	64181658	64182058	MSTRG.111598.1	1	401	MSTRG.111598	.	0.0001	0.0001	0.0001	2.30855	2.23572	0.0001	6.60157e-05	-13.8868	0.0732354	1	down	no
72724	i	chr2.3	.	46785341	46785556	MSTRG.38203.1	1	216	MSTRG.38203	MS.gene037122	4.17724	3.93624	0.0001	0.0001	0.0001	0.0001	27045.3	14.7231	0.0733244	1	up	no
268003	u	chr8.1	+	34849817	34850755	MSTRG.141228.1	2	432	MSTRG.141228	.	2.13271	2.08819	0.0001	0.0001	0.0001	0.0001	14070	13.7803	0.07335	1	up	no
220262	i	chr6.3	.	74646168	74646506	MSTRG.115997.1	1	339	MSTRG.115997	MS.gene05315	0.0001	0.0001	0.0001	0.0001	2.54313	2.54628	5.89447e-05	-14.0503	0.07336	1	down	no
221778	i	chr6.4	.	5925060	5925435	MSTRG.116857.1	1	376	MSTRG.116857	MS.gene65548	0.0001	0.0001	0.0001	2.32721	2.60617	0.0001	6.0809e-05	-14.0054	0.0733613	1	down	no
220849	j	chr6.3	-	80829696	80830148	MSTRG.116355.2	2	216	MSTRG.116355	MS.gene61353	0.0001	0.0001	0.0001	0.0001	3.62934	4.31855	3.77454e-05	-14.6933	0.073362	1	down	no
221540	u	chr6.4	.	2924847	2925614	MSTRG.116702.1	1	768	MSTRG.116702	.	0.0001	0.0001	0.0001	1.11676	1.22979	0.0001	0.000127842	-12.9334	0.0733675	1	down	no
288957	u	chr8.3	+	49434784	49443913	MSTRG.152198.2	2	1276	MSTRG.152198	.	0.0001	0.858604	1.12835	4.97433	6.90758	3.1599	0.132102	-2.92027	0.073368	1	down	no
93800	u	chr3.1	.	82540548	82541043	MSTRG.49293.1	1	496	MSTRG.49293	.	3.87344	8.95236	5.50752	1.55815	0.0001	0.0001	11.7645	3.55637	0.0733718	1	up	no
702	u	11333	.	22258	22607	MSTRG.288.1	1	350	MSTRG.288	.	0.0001	0.0001	0.0001	0.0001	2.35181	2.65254	5.99466e-05	-14.026	0.0733764	1	down	no
198006	u	chr5.4	.	48429116	48429451	MSTRG.104063.1	1	336	MSTRG.104063	.	2.48344	2.92389	0.0001	0.0001	0.0001	0.0001	18024.7	14.1377	0.0734231	1	up	no
188876	u	chr5.3	.	41858206	41858773	MSTRG.99356.1	1	568	MSTRG.99356	.	0.0001	0.187526	0.0001	3.21688	0.266735	2.26499	0.0326559	-4.93651	0.0735119	1	down	no
27486	u	chr1.2	.	59199873	59200483	MSTRG.14332.1	1	611	MSTRG.14332	.	0.268851	0.0001	0.0001	3.0222	0.318485	3.34846	0.040222	-4.63587	0.0737641	1	down	no
165561	u	chr4.4	.	76540150	76540544	MSTRG.87263.1	1	395	MSTRG.87263	.	0.212455	0.255313	2.60038	15.1262	2.19402	9.13499	0.115975	-3.10812	0.0740162	1	down	no
232396	u	chr7.1	.	56998077	56999602	MSTRG.122447.1	1	1526	MSTRG.122447	.	0.092046	1.2333	0.33345	1.97347	5.0197	2.94766	0.166866	-2.58323	0.0742227	1	down	no
22050	i	chr1.2	.	6211159	6211591	MSTRG.11592.1	1	433	MSTRG.11592	MS.gene24558	5.3159	7.8194	1.36728	1.10472	0.43453	0.049677	9.12728	3.19019	0.0742751	1	up	no
186732	u	chr5.3	-	15816476	15823570	MSTRG.98260.1	2	1014	MSTRG.98260	.	0.767886	0.576003	1.00242	0.238932	7.9199	7.09049	0.153863	-2.70028	0.0744219	1	down	no
286694	i	chr8.3	.	27670524	27670944	MSTRG.150938.1	1	421	MSTRG.150938	MS.gene89637	0.0001	0.0001	0.0001	2.33621	1.85878	0.0001	7.15122e-05	-13.7715	0.0744422	1	down	no
26332	u	chr1.2	-	49496780	49515556	MSTRG.13702.2	3	552	MSTRG.13702	.	0.199194	0.0001	0.0001	6.33588	2.70872	0.0001	0.0220454	-5.50338	0.0744609	1	down	no
194114	u	chr5.4	.	8147039	8147270	MSTRG.102045.1	1	232	MSTRG.102045	.	3.51974	3.93992	0.0001	0.0001	0.0001	0.0001	24865.9	14.6019	0.0744694	1	up	no
178387	u	chr5.2	.	19750014	19750251	MSTRG.93932.1	1	238	MSTRG.93932	.	0.0001	0.0001	0.0001	3.50716	3.95963	0.0001	4.01774e-05	-14.6033	0.0745464	1	down	no
99983	u	chr3.2	.	57901365	57902224	MSTRG.52554.1	1	860	MSTRG.52554	.	0.655557	0.0001	0.0001	4.91998	3.26546	0.9419	0.0718454	-3.79896	0.0746759	1	down	no
246349	u	chr7.3	.	12295108	12296850	MSTRG.129806.1	1	1743	MSTRG.129806	.	0.0001	0.230083	0.0001	1.68055	0.455212	1.30248	0.0669771	-3.90019	0.0750661	1	down	no
296795	j	chr8.4	-	32551681	32553251	MSTRG.156169.2	4	840	MSTRG.156169	MS.gene95705	3.42013	1.28538	3.26177	0.663639	0.169619	0.0001	9.56045	3.25708	0.0750809	1	up	no
177987	i	chr5.2	+	16458444	16458666	MSTRG.93732.2	1	223	MSTRG.93732	MS.gene82443	0.0001	0.203253	0.0001	12.1193	5.27312	0.0001	0.0116977	-6.41763	0.0750905	1	down	no
219826	u	chr6.3	+	70618774	70661325	MSTRG.115796.1	2	570	MSTRG.115796	.	0.0001	4.08591	3.3319	9.64945	9.46026	33.342	0.141424	-2.82191	0.0752372	1	down	no
252908	u	chr7.3	-	80038844	80039180	MSTRG.133280.1	1	337	MSTRG.133280	.	0.932499	0.445184	0.25259	4.75588	5.86007	4.0258	0.111344	-3.1669	0.0753185	1	down	no
107842	u	chr3.3	.	36516264	36516568	MSTRG.56707.1	1	305	MSTRG.56707	.	0.0001	0.0001	0.0001	0.0001	2.80954	2.69082	5.45409e-05	-14.1623	0.0754779	1	down	no
210369	u	chr6.2	.	29522783	29523043	MSTRG.110641.1	1	261	MSTRG.110641	.	0.0001	0.0001	0.0001	0.0001	3.14205	3.35316	4.61871e-05	-14.4021	0.0755199	1	down	no
35868	i	chr1.3	.	38489487	38489757	MSTRG.18872.1	1	271	MSTRG.18872	MS.gene034569	0.0001	0.0001	0.816676	0.0001	9.04371	16.7833	0.0316286	-4.98263	0.0756647	1	down	no
142633	i	chr4.2	.	46394203	46394404	MSTRG.75329.1	1	202	MSTRG.75329	MS.gene049765	1.66177	0.471204	0.606348	0.912881	13.817	11.3102	0.105196	-3.24884	0.0756922	1	down	no
215086	u	chr6.3	.	5435543	5435986	MSTRG.113263.1	1	444	MSTRG.113263	.	50.8807	43.0795	16.9457	6.54019	12.6552	0.114186	5.74357	2.52195	0.0757885	1	up	no
237170	u	chr7.2	.	15115361	15115777	MSTRG.124921.1	1	417	MSTRG.124921	.	2.31933	1.26357	2.0175	0.0001	0.0001	0.170727	32.7648	5.03407	0.0759257	1	up	no
135748	u	chr4.1	.	87727569	87728258	MSTRG.71593.1	1	690	MSTRG.71593	.	3.38214	3.20918	1.80492	0.0001	0.0001	0.583637	14.3811	3.84611	0.0759665	1	up	no
32844	u	chr1.3	.	8056166	8056584	MSTRG.17236.1	1	419	MSTRG.17236	.	0.0001	3.04918	5.38987	0.177535	0.0001	0.0001	47.4816	5.5693	0.0762604	1	up	no
56736	u	chr2.1	.	50611784	50612212	MSTRG.29828.1	1	429	MSTRG.29828	.	1.8979	0.0001	1.86516	0.0001	0.0001	0.0001	12543.9	13.6147	0.0765745	1	up	no
206383	i	chr6.1	-	69853139	69853470	MSTRG.108458.1	1	332	MSTRG.108458	MS.gene47640	0.0001	0.0001	0.0001	0.0001	2.66897	2.38806	5.93222e-05	-14.0411	0.0766069	1	down	no
191295	i	chr5.3	.	67246486	67247021	MSTRG.100576.1	1	536	MSTRG.100576	MS.gene29677	0.0001	0.0001	0.0001	1.59052	1.60973	0.0001	9.37397e-05	-13.381	0.0766172	1	down	no
86716	u	chr3.1	.	19875601	19875915	MSTRG.45519.1	1	315	MSTRG.45519	.	2.65278	2.76149	0.0001	0.0001	0.0001	0.0001	18047.9	14.1395	0.0766174	1	up	no
223746	u	chr6.4	.	40037828	40038164	MSTRG.117813.1	1	337	MSTRG.117813	.	0.0001	0.0001	0.0001	2.40828	2.71599	0.0001	5.85438e-05	-14.0601	0.0766595	1	down	no
96260	u	chr3.2	-	8842337	8852683	MSTRG.50636.1	2	711	MSTRG.50636	.	0.0001	0.0001	0.292085	2.21513	0.57667	3.42479	0.0470169	-4.41068	0.076917	1	down	no
135195	o	chr4.1	-	81893327	82196351	MSTRG.71346.1	2	490	MSTRG.71346	MS.gene24992	1.98489	3.00623	15.3153	0.0001	1.40844	0.819513	9.11398	3.18808	0.0771463	1	up	no
208070	u	chr6.2	-	4476457	4476752	MSTRG.109397.1	1	296	MSTRG.109397	.	1.81971	1.47639	0.384235	6.61404	10.0796	8.28148	0.14736	-2.76258	0.0772196	1	down	no
246987	j	chr7.3	-	17206478	17209162	MSTRG.130113.3	2	957	MSTRG.130113	MS.gene04640	1.49543	2.84005	2.50068	0.064116	0.572321	0.0001	10.7396	3.42487	0.0772934	1	up	no
26825	i	chr1.2	.	53151473	53151936	MSTRG.13994.1	1	464	MSTRG.13994	MS.gene50639	0.723445	3.44254	2.12399	0.237945	0.0001	0.0001	26.4124	4.72314	0.0773956	1	up	no
164698	u	chr4.4	.	66074555	66074855	MSTRG.86883.1	1	301	MSTRG.86883	.	9.94001	6.17765	3.72196	0.0001	1.30222	0.0001	15.2329	3.92912	0.0774363	1	up	no
83857	u	chr2.4	-	69660960	69661252	MSTRG.43956.1	1	293	MSTRG.43956	.	0.0001	5.73012	6.27096	0.237847	0.0001	0.0001	50.4152	5.65579	0.0775766	1	up	no
85622	u	chr3.1	.	7237516	7237762	MSTRG.44949.1	1	247	MSTRG.44949	.	3.34936	3.37646	0.0001	0.0001	0.0001	0.0001	22419.8	14.4525	0.0777518	1	up	no
157124	u	chr4.4	.	2452099	2452389	MSTRG.82801.1	1	291	MSTRG.82801	.	0.0001	6.79791	0.0001	125.926	18.8468	0.0001	0.046957	-4.41252	0.0778162	1	down	no
9280	u	56945	.	15628	16284	MSTRG.4903.1	1	657	MSTRG.4903	.	0.736947	8.34026	5.1746	0.881051	1.00227	0.208513	6.81306	2.7683	0.0779753	1	up	no
120530	u	chr3.4	-	62956100	62956945	MSTRG.63482.1	3	463	MSTRG.63482	.	1.37996	2.45759	7.57158	0.689043	0.406781	0.0001	10.4105	3.37997	0.0780209	1	up	no
73966	u	chr2.3	.	58234017	58235088	MSTRG.38834.1	1	1072	MSTRG.38834	.	0.239846	0.33085	1.28549	2.78587	3.10645	5.58574	0.161716	-2.62847	0.0780383	1	down	no
215527	i	chr6.3	.	9491989	9492262	MSTRG.113480.1	1	274	MSTRG.113480	MS.gene86148	3.99788	1.13934	6.97016	0.5344	0.0001	0.0001	22.6475	4.50128	0.0783413	1	up	no
72080	u	chr2.3	.	38849172	38849966	MSTRG.37865.1	1	795	MSTRG.37865	.	0.0001	0.0001	0.0001	1.03418	0.986084	0.0001	0.000148488	-12.7174	0.0786887	1	down	no
37063	u	chr1.3	.	49342228	49342966	MSTRG.19490.1	1	739	MSTRG.19490	.	3.13002	29.2549	24.3172	5.47015	0.0001	0.0001	10.3654	3.3737	0.0788795	1	up	no
222298	o	chr6.4	-	13583800	13704739	MSTRG.117175.1	2	592	MSTRG.117175	MS.gene85792	29.0657	34.967	32.8708	16.6631	0.266527	0.692401	5.49901	2.45917	0.0791068	1	up	no
139599	u	chr4.2	.	22803922	22804418	MSTRG.73679.1	1	497	MSTRG.73679	.	0.0001	0.199115	2.0981	11.784	8.0489	3.52545	0.098351	-3.34592	0.0791441	1	down	no
52062	u	chr2.1	+	3189953	3191624	MSTRG.27476.1	1	1672	MSTRG.27476	.	1.35196	5.00445	0.446883	0.514445	0.351647	0.181932	6.49154	2.69856	0.0792243	1	up	no
83627	u	chr2.4	.	67945611	67947026	MSTRG.43841.1	1	1416	MSTRG.43841	.	0.0001	0.0001	0.210569	0.0001	3.34091	2.38439	0.036813	-4.76364	0.0792442	1	down	no
19769	u	chr1.1	+	73977910	73978387	MSTRG.10274.1	2	284	MSTRG.10274	.	2.04575	7.79197	0.0001	19.9489	19.1385	29.7313	0.142953	-2.80639	0.0792636	1	down	no
1363	u	15163	.	25983	26445	MSTRG.550.1	1	463	MSTRG.550	.	3.93854	6.41787	5.83337	0.959754	0.0001	0.900382	8.70308	3.12153	0.0793207	1	up	no
189389	x	chr5.3	+	49217979	49234723	MSTRG.99623.1	2	230	MSTRG.99623	MS.gene035919	0.0001	0.0001	0.0001	3.44871	3.40842	0.0001	4.37494e-05	-14.4804	0.079836	1	down	no
233516	u	chr7.1	.	72052452	72052769	MSTRG.123025.1	1	318	MSTRG.123025	.	0.0001	0.0001	0.0001	2.52513	2.60617	0.0001	5.84636e-05	-14.0621	0.079836	1	down	no
212413	u	chr6.2	.	68244450	68245183	MSTRG.111694.1	1	734	MSTRG.111694	.	1.07359	3.16783	1.6339	0.0001	0.332341	0.0001	17.668	4.14306	0.0798899	1	up	no
85102	u	chr3.1	-	1794723	1795366	MSTRG.44655.1	1	644	MSTRG.44655	.	0.109054	0.155425	0.218976	2.57905	1.6366	1.5206	0.0842806	-3.56866	0.0799904	1	down	no
201945	u	chr6.1	.	3914084	3914655	MSTRG.106129.1	1	572	MSTRG.106129	.	8.36401	7.25553	0.0001	0.704311	0.0001	0.0001	22.1709	4.47059	0.0800212	1	up	no
59147	u	chr2.1	+	70461487	70463076	MSTRG.31062.1	1	1590	MSTRG.31062	.	3.4702	4.6696	1.21131	21.2133	13.9662	4.27409	0.237016	-2.07695	0.0803849	1	down	no
243207	u	chr7.2	.	78593525	78593883	MSTRG.128150.1	1	359	MSTRG.128150	.	0.775882	0.0001	0.0001	10.9345	2.45276	0.829297	0.0545899	-4.19522	0.0804789	1	down	no
117538	u	chr3.4	.	22899015	22899298	MSTRG.61859.1	1	284	MSTRG.61859	.	3.87283	22.6959	10.4064	3.28098	0.0001	0.0001	11.2689	3.49427	0.0806057	1	up	no
249479	i	chr7.3	.	35886272	35886698	MSTRG.131511.1	1	427	MSTRG.131511	MS.gene94708	5.49735	7.98058	2.54505	1.47069	0.0001	0.159993	9.82532	3.2965	0.0807171	1	up	no
183201	i	chr5.2	.	73416186	73416471	MSTRG.96473.1	1	286	MSTRG.96473	MS.gene016789	2.37654	0.726367	0.0001	3.26351	12.2508	12.4011	0.111157	-3.16933	0.0807415	1	down	no
252523	u	chr7.3	.	76131041	76132247	MSTRG.133052.1	1	1207	MSTRG.133052	.	3.65816	5.41803	5.23202	1.46403	0.0001	0.0001	9.77181	3.28863	0.080945	1	up	no
32176	u	chr1.3	-	3340484	3342047	MSTRG.16858.1	1	1564	MSTRG.16858	.	5.30018	3.03556	1.53737	10.1892	15.9394	11.8482	0.259977	-1.94354	0.0811789	1	down	no
6069	u	41579	.	6028	6231	MSTRG.3307.1	1	204	MSTRG.3307	.	191.153	110.466	124.647	784.473	297.25	514.383	0.267066	-1.90473	0.0812115	1	down	no
61781	u	chr2.2	.	12145193	12146300	MSTRG.32508.1	1	1108	MSTRG.32508	.	34.4942	51.6793	10.7665	107.394	128.346	124.477	0.269115	-1.8937	0.0812471	1	down	no
228219	u	chr7.1	.	14880126	14881047	MSTRG.120215.1	1	922	MSTRG.120215	.	0.616348	0.624261	0.568733	8.13234	8.6905	0.0001	0.107552	-3.21689	0.0812713	1	down	no
273163	u	chr8.1	-	86805644	86809889	MSTRG.143863.1	3	932	MSTRG.143863	.	0.0001	0.0001	0.232021	2.68558	1.29203	0.910094	0.0475113	-4.39559	0.0813911	1	down	no
196558	u	chr5.4	.	26959175	26959899	MSTRG.103348.1	1	725	MSTRG.103348	.	1.77105	3.79014	2.0074	0.304569	0.0001	0.454288	9.97235	3.31793	0.0815175	1	up	no
279248	u	chr8.2	+	49280591	49283189	MSTRG.146984.1	2	2251	MSTRG.146984	.	2.69135	4.65412	5.91925	19.7315	17.22	14.3077	0.258777	-1.95022	0.0816068	1	down	no
22174	u	chr1.2	+	7119836	7121036	MSTRG.11565.1	1	1201	MSTRG.11565	.	0.30436	1.02508	5.76762	0.267038	0.599307	0.161893	6.90215	2.78705	0.0818122	1	up	no
43719	x	chr1.4	-	17914755	17927663	MSTRG.23146.1	2	290	MSTRG.23146	MS.gene83012	0.176213	0.860217	0.0001	5.67922	0.065466	10.0646	0.0655647	-3.93094	0.0818392	1	down	no
230624	u	chr7.1	.	33484161	33485007	MSTRG.121547.1	1	847	MSTRG.121547	.	0.0001	0.125755	0.208815	1.53184	0.147694	3.33158	0.0667856	-3.90432	0.081926	1	down	no
262735	u	chr7.4	.	88105113	88107046	MSTRG.138371.1	1	1934	MSTRG.138371	.	0.451767	0.251547	0.833777	2.68987	2.13525	3.15742	0.192557	-2.37665	0.0821196	1	down	no
119824	i	chr3.4	-	55997290	55997777	MSTRG.63015.2	1	488	MSTRG.63015	MS.gene04305	0.06342	0.0001	0.0001	0.004448	1.60643	2.28558	0.0163277	-5.93654	0.0821376	1	down	no
256033	j	chr7.4	+	13247774	13248629	MSTRG.134787.1	4	544	MSTRG.134787	MS.gene04827	14.4989	0.687192	18.697	2.92568	1.32115	0.0001	7.97829	2.99608	0.0826858	1	up	no
18901	u	chr1.1	.	68521286	68522047	MSTRG.9792.1	1	762	MSTRG.9792	.	8.25512	23.7923	18.856	5.2032	4.64961	3.1851	3.90426	1.96505	0.0829711	1	up	no
220882	j	chr6.3	-	81118323	81119368	MSTRG.116372.2	2	536	MSTRG.116372	MS.gene61331	3.63308	4.72872	0.947774	0.0001	0.513359	0.0001	18.1276	4.18011	0.0829864	1	up	no
223541	u	chr6.4	.	35582753	35583027	MSTRG.117719.1	1	275	MSTRG.117719	.	0.0001	0.871483	0.0001	7.87508	2.0167	5.62879	0.0561631	-4.15423	0.0830836	1	down	no
32604	u	chr1.3	.	6019749	6020143	MSTRG.17081.1	1	395	MSTRG.17081	.	0.424909	188.669	281.655	0.0001	11.4927	32.8831	10.6082	3.40711	0.0831837	1	up	no
136684	i	chr4.2	.	4102857	4103518	MSTRG.72106.1	1	662	MSTRG.72106	MS.gene06103	3.52969	5.11964	1.22512	0.76883	0.0001	0.0001	12.8401	3.68259	0.083187	1	up	no
203731	u	chr6.1	+	27493573	27499907	MSTRG.107014.1	2	342	MSTRG.107014	.	0.0001	0.0001	0.52962	0.0001	12.5183	5.28018	0.0297676	-5.07011	0.0832571	1	down	no
269467	u	chr8.1	-	49212219	49213060	MSTRG.141985.1	1	842	MSTRG.141985	.	0.825257	0.209491	0.312555	2.37488	2.73672	3.54591	0.155622	-2.68388	0.0833409	1	down	no
208430	u	chr6.2	.	8322822	8323414	MSTRG.109601.1	1	593	MSTRG.109601	.	5.475	0.0001	3.64288	0.322849	0.0001	0.0001	28.2248	4.81889	0.0833439	1	up	no
84234	i	chr2.4	-	72295221	72295504	MSTRG.44160.2	1	284	MSTRG.44160	MS.gene01732	0.142063	0.0001	0.073267	3.07161	0.083804	4.25588	0.0290678	-5.10443	0.083411	1	down	no
289096	u	chr8.3	.	52111463	52112012	MSTRG.152216.1	1	550	MSTRG.152216	.	0.0001	0.788386	0.0001	6.28964	10.62	0.0001	0.0466349	-4.42245	0.0835035	1	down	no
37438	i	chr1.3	.	52690726	52691349	MSTRG.19695.1	1	624	MSTRG.19695	MS.gene95457	0.0001	0.124088	0.0001	0.484371	1.25965	1.75171	0.0355542	-4.81384	0.0836952	1	down	no
12492	i	chr1.1	-	9951039	9951488	MSTRG.6438.2	1	450	MSTRG.6438	MS.gene015893	1.87149	0.001007	3.9146	0.121026	0.0001	0.0001	47.7381	5.57707	0.0841464	1	up	no
23045	u	chr1.2	.	14016348	14016747	MSTRG.12171.1	1	400	MSTRG.12171	.	2.01318	0.266286	0.0001	0.522668	11.5992	10.648	0.100113	-3.3203	0.0841776	1	down	no
159165	i	chr4.4	.	15149897	15150509	MSTRG.83937.1	1	613	MSTRG.83937	MS.gene09005	0.0001	0.0001	2.42547	9.64697	11.4881	6.6475	0.0873088	-3.51773	0.0843871	1	down	no
256446	u	chr7.4	.	16367713	16368472	MSTRG.135005.1	1	760	MSTRG.135005	.	5.01748	6.25609	2.33901	1.05708	0.566043	0.833144	5.54197	2.4704	0.0848564	1	up	no
5724	u	41095	+	15385	25856	MSTRG.3006.3	2	224	MSTRG.3006	.	198.764	98.3926	78.9586	35.7529	48.4124	10.8169	3.95985	1.98545	0.0850406	1	up	no
183985	i	chr5.2	.	79301223	79301703	MSTRG.96813.1	1	481	MSTRG.96813	MS.gene81425	0.0001	1.21166	0.831761	9.59001	6.50622	1.97572	0.113077	-3.14462	0.08534	1	down	no
246693	u	chr7.3	-	14959348	14960312	MSTRG.129958.1	1	965	MSTRG.129958	.	2.6052	4.83584	3.37422	18.4465	8.45451	15.4921	0.255118	-1.97076	0.0854385	1	down	no
38339	u	chr1.3	.	59759740	59760635	MSTRG.20174.1	1	896	MSTRG.20174	.	0.0001	0.0001	0.580047	2.92279	2.56351	2.41782	0.0734107	-3.76787	0.0858089	1	down	no
217271	u	chr6.3	-	29699867	29700619	MSTRG.114403.1	1	753	MSTRG.114403	.	3.00986	2.25674	1.3423	0.231891	0.246427	0.393704	7.57882	2.92197	0.0858336	1	up	no
58767	u	chr2.1	.	67753901	67754372	MSTRG.30851.1	1	472	MSTRG.30851	.	1.21683	6.4579	2.93612	0.69344	0.0001	0.0001	15.2973	3.93521	0.0859419	1	up	no
169180	i	chr5.1	-	14674056	14679971	MSTRG.89149.1	2	240	MSTRG.89149	MS.gene86562	0.0001	16.9909	5.27159	0.762696	0.0001	0.0001	29.1817	4.86699	0.0859778	1	up	no
217444	o	chr6.3	+	32449079	32503515	MSTRG.114697.4	3	743	MSTRG.114697	MS.gene07994	0.0001	0.92548	1.89159	0.924474	16.364	6.25069	0.11968	-3.06274	0.0860212	1	down	no
92889	i	chr3.1	+	76209931	76210486	MSTRG.48800.1	1	556	MSTRG.48800	MS.gene049320	8.36866	8.95139	13.9497	3.11942	2.37347	1.56856	4.42823	2.14673	0.0862838	1	up	no
189440	u	chr5.3	.	49935617	49935999	MSTRG.99667.1	1	383	MSTRG.99667	.	3.14198	1.43885	0.0001	35.2119	2.92871	1.85226	0.114544	-3.12603	0.0862892	1	down	no
282546	i	chr8.2	.	81745063	81745495	MSTRG.148681.1	1	433	MSTRG.148681	MS.gene39353	6.76158	5.79768	2.28625	0.454805	1.1706	0.0001	9.13283	3.19106	0.0863603	1	up	no
187770	u	chr5.3	+	24476144	24478290	MSTRG.98783.1	3	467	MSTRG.98783	.	20.9792	23.1788	16.1044	9.92408	2.7189	1.04904	4.40128	2.13792	0.0863852	1	up	no
210675	u	chr6.2	-	33875359	33876098	MSTRG.111047.1	2	318	MSTRG.111047	.	3.16491	13.7152	8.37695	0.0001	1.45115	1.48348	8.60626	3.10539	0.0863978	1	up	no
219001	u	chr6.3	+	59635790	59636132	MSTRG.115304.1	1	343	MSTRG.115304	.	3.60612	3.2801	12.9506	1.12301	1.12183	0.841425	6.42746	2.68425	0.0866753	1	up	no
57730	u	chr2.1	.	59596726	59597957	MSTRG.30333.1	1	1232	MSTRG.30333	.	0.873003	0.0001	3.33678	0.16706	0.0001	0.0001	25.1697	4.65361	0.0867097	1	up	no
34355	o	chr1.3	-	20700328	20829210	MSTRG.18144.1	2	1443	MSTRG.18144	MS.gene95906	0.0001	1.641	0.0001	29.141	3.64226	0.0001	0.0500622	-4.32014	0.0868127	1	down	no
207014	i	chr6.1	+	75832973	75833222	MSTRG.108854.4	1	250	MSTRG.108854	MS.gene052467	1.5665	15.7868	12.5055	1.93877	0.783937	1.81507	6.58006	2.7181	0.0870205	1	up	no
223181	u	chr6.4	-	29611624	29616837	MSTRG.117539.1	2	512	MSTRG.117539	.	2.52746	0.373531	3.11914	8.50598	20.353	4.76215	0.179058	-2.4815	0.0873921	1	down	no
86206	u	chr3.1	-	13168315	13171486	MSTRG.45331.1	3	813	MSTRG.45331	.	3.84631	0.0001	2.67165	0.0001	0.189773	0.162754	18.4843	4.20823	0.0875405	1	up	no
267863	u	chr8.1	-	33916826	33917240	MSTRG.141182.1	1	415	MSTRG.141182	.	3.4936	3.472	5.87108	0.171888	1.10359	0.0001	10.0634	3.33104	0.0875995	1	up	no
91027	i	chr3.1	-	63634710	63635565	MSTRG.47807.1	1	856	MSTRG.47807	MS.gene70651	0.285767	0.0001	0.0001	1.36901	0.870023	2.56566	0.0595182	-4.07052	0.0876511	1	down	no
211611	u	chr6.2	.	52173071	52173402	MSTRG.111268.1	1	332	MSTRG.111268	.	2.11538	0.0001	0.0001	14.2701	3.52723	6.74179	0.0862124	-3.53596	0.0876885	1	down	no
122188	u	chr3.4	.	76404119	76404752	MSTRG.64245.1	1	634	MSTRG.64245	.	0.264731	0.0001	0.0001	0.0001	1.53411	6.15283	0.0344647	-4.85874	0.0878824	1	down	no
287402	u	chr8.3	-	33100403	33101300	MSTRG.151309.1	1	898	MSTRG.151309	.	0.654162	3.02716	1.48507	0.359467	0.0001	0.0001	14.3644	3.84442	0.0879529	1	up	no
33946	i	chr1.3	.	16799469	16800278	MSTRG.17863.1	1	810	MSTRG.17863	MS.gene62966	0.0001	0.0001	0.141287	1.20209	0.290862	2.57886	0.0347479	-4.84693	0.0879734	1	down	no
182986	i	chr5.2	-	71771095	71771878	MSTRG.96271.1	1	784	MSTRG.96271	MS.gene98880	5.21643	0.305758	0.370965	10.8368	6.63174	13.0201	0.19329	-2.37116	0.0880816	1	down	no
4879	u	39923	.	13505	13870	MSTRG.2222.1	1	366	MSTRG.2222	.	3.41494	27.8247	24.1982	5.55284	1.1507	4.5466	4.92775	2.30093	0.0888879	1	up	no
81479	i	chr2.4	.	49056689	49057455	MSTRG.42762.1	1	767	MSTRG.42762	MS.gene070671	0.697603	0.93566	0.424812	0.719218	1.82806	10.2604	0.16069	-2.63764	0.0892642	1	down	no
34977	u	chr1.3	.	27126664	27127353	MSTRG.18448.1	1	690	MSTRG.18448	.	10.2982	17.5679	13.9144	3.74263	5.3594	0.481501	4.35962	2.1242	0.0893473	1	up	no
239734	u	chr7.2	-	34623147	34623517	MSTRG.126288.1	1	371	MSTRG.126288	.	3.48121	4.30041	3.0777	0.0001	0.0001	0.646598	16.7894	4.06947	0.0895353	1	up	no
223450	u	chr6.4	-	34261811	34263658	MSTRG.117669.1	2	1083	MSTRG.117669	.	4.77935	8.95701	3.70718	0.480804	2.01016	1.19744	4.7293	2.24163	0.0896652	1	up	no
287727	i	chr8.3	.	36360667	36361196	MSTRG.151483.1	1	530	MSTRG.151483	MS.gene71203	0.552502	0.549463	0.0001	2.79008	1.47126	5.9131	0.108317	-3.20667	0.089725	1	down	no
85885	i	chr3.1	.	9791545	9792431	MSTRG.45103.1	1	887	MSTRG.45103	MS.gene039630	1.1834	5.71804	2.12514	0.0001	0.851683	0.057968	9.92204	3.31064	0.0897486	1	up	no
241918	u	chr7.2	+	63764318	63765496	MSTRG.127501.1	2	360	MSTRG.127501	.	2.68104	3.8377	0.146469	0.0001	0.0001	0.117591	56.5851	5.82235	0.0897613	1	up	no
225762	u	chr6.4	.	63000165	63000593	MSTRG.118984.1	1	429	MSTRG.118984	.	0.0001	0.0001	0.227082	2.28336	3.1185	0.888429	0.0361322	-4.79057	0.0899053	1	down	no
200129	u	chr5.4	.	68230255	68230636	MSTRG.105160.1	1	382	MSTRG.105160	.	1.3072	0.0001	0.0001	0.0001	5.82091	21.1323	0.0485062	-4.36569	0.0904444	1	down	no
158762	u	chr4.4	.	12639417	12641604	MSTRG.83695.1	1	2188	MSTRG.83695	.	5.27428	3.36626	3.67495	0.915973	1.13014	0.0001	6.01869	2.58945	0.0904732	1	up	no
232710	u	chr7.1	+	62503125	62503661	MSTRG.122614.2	1	537	MSTRG.122614	.	1.54391	0.716033	0.0001	5.05685	6.16768	5.33652	0.136467	-2.87337	0.0905901	1	down	no
173057	i	chr5.1	.	57917627	57919076	MSTRG.91085.1	1	1450	MSTRG.91085	MS.gene98038	0.601332	0.0001	0.150677	4.55207	0.634109	1.37849	0.114569	-3.12571	0.0906863	1	down	no
200497	i	chr5.4	.	71093058	71093965	MSTRG.105391.1	1	908	MSTRG.105391	MS.gene038214	1.24574	2.33677	0.764043	0.121593	0.215842	0.0001	12.8773	3.68676	0.090854	1	up	no
157441	i	chr4.4	.	4260816	4261324	MSTRG.82981.1	1	509	MSTRG.82981	MS.gene20192	4.12763	2.48814	0.0001	0.111531	0.0001	0.0001	59.2126	5.88783	0.0909178	1	up	no
83615	i	chr2.4	.	67849445	67849987	MSTRG.43832.1	1	543	MSTRG.43832	MS.gene004353	0.225794	2.42625	3.30598	0.261729	0.0001	0.0001	22.7467	4.50759	0.0911409	1	up	no
17663	i	chr1.1	.	60679681	60679889	MSTRG.9114.1	1	209	MSTRG.9114	MS.gene005178	6.12097	4.1311	0.066099	0.087225	0.139661	0.0001	45.4573	5.50644	0.0913614	1	up	no
210257	u	chr6.2	.	28209672	28210436	MSTRG.110595.1	1	765	MSTRG.110595	.	0.212396	0.0001	0.0001	1.41712	2.04588	1.05002	0.0471074	-4.4079	0.0916169	1	down	no
152	u	10660	-	4185	10807	MSTRG.75.1	2	497	MSTRG.75	.	0.209216	0.0001	1.47237	18.7842	8.0222	0.0001	0.0627342	-3.9946	0.091665	1	down	no
189114	u	chr5.3	.	45386970	45387473	MSTRG.99469.1	1	504	MSTRG.99469	.	0.329471	0.0001	0.0001	2.25935	1.16382	3.42868	0.0481142	-4.37739	0.0916805	1	down	no
225008	u	chr6.4	+	55208592	55217384	MSTRG.118555.1	2	400	MSTRG.118555	.	1.15995	7.99976	0.390749	16.0805	13.981	18.3714	0.197189	-2.34235	0.0921008	1	down	no
98237	u	chr3.2	.	38501528	38501917	MSTRG.51682.1	1	390	MSTRG.51682	.	2.1646	4.29303	3.14299	0.510772	0.0001	0.0001	18.7889	4.23181	0.0921337	1	up	no
266771	u	chr8.1	-	25194920	25205385	MSTRG.140569.1	2	624	MSTRG.140569	.	0.0001	4.60275	1.72049	0.15396	0.0001	0.0001	41.018	5.35819	0.0923266	1	up	no
64140	u	chr2.2	.	39802721	39803027	MSTRG.33725.1	1	307	MSTRG.33725	.	2.12479	2.95771	7.04427	0.645293	0.0001	0.0001	18.7868	4.23165	0.0924937	1	up	no
218260	u	chr6.3	.	46057583	46057866	MSTRG.114897.1	1	284	MSTRG.114897	.	0.0001	0.0001	0.487891	2.71439	3.41127	4.47427	0.0460466	-4.44076	0.092507	1	down	no
231449	u	chr7.1	.	42920810	42922281	MSTRG.121988.1	1	1472	MSTRG.121988	.	0.0001	0.674765	0.170271	4.02773	0.547438	2.44817	0.120332	-3.0549	0.0925144	1	down	no
195969	u	chr5.4	+	22042428	22042968	MSTRG.103046.3	2	429	MSTRG.103046	.	0.0001	0.03874	0.0001	2.17335	0.0001	3.01335	0.00750751	-7.05745	0.0925977	1	down	no
296829	u	chr8.4	.	32737125	32737808	MSTRG.156187.1	1	684	MSTRG.156187	.	2.63217	2.63901	0.745999	0.211019	0.286527	0.0001	12.0913	3.59589	0.0928266	1	up	no
32721	u	chr1.3	+	7049639	7051091	MSTRG.17158.1	1	1453	MSTRG.17158	.	0.231675	0.464267	0.709845	3.01467	2.6385	1.9422	0.185085	-2.43374	0.092904	1	down	no
243400	u	chr7.2	.	81305421	81306402	MSTRG.128254.1	1	982	MSTRG.128254	.	9.86957	2.52859	4.37284	12.5616	25.2674	25.5192	0.264743	-1.91734	0.0929509	1	down	no
207150	o	chr6.1	+	76987625	77329883	MSTRG.109006.1	2	610	MSTRG.109006	MS.gene061498	2.27825	1.48208	2.18224	5.13141	5.75419	16.5122	0.2169	-2.2049	0.0930008	1	down	no
167328	u	chr5.1	+	1220167	1220771	MSTRG.88186.1	2	495	MSTRG.88186	.	6.44933	13.1507	0.0001	0.0001	0.0001	0.921787	21.2586	4.40997	0.093111	1	up	no
195786	u	chr5.4	+	20525343	20527516	MSTRG.102936.1	2	2077	MSTRG.102936	.	3.08878	6.28221	5.04279	1.65803	0.0001	0.0001	8.69224	3.11973	0.0933416	1	up	no
187251	u	chr5.3	+	20316390	20320296	MSTRG.98518.6	2	380	MSTRG.98518	.	1.03805	0.0001	0.0001	18.0353	4.51715	0.0001	0.046037	-4.44106	0.0934757	1	down	no
42243	u	chr1.4	-	5810259	5810993	MSTRG.22353.1	4	356	MSTRG.22353	.	3.97531	4.06313	7.92447	1.3252	0.0001	0.0001	12.0438	3.59022	0.0935643	1	up	no
59253	i	chr2.1	.	71132709	71132949	MSTRG.31128.1	1	241	MSTRG.31128	MS.gene002458	2.50253	0.0001	0.0001	5.17792	11.9435	11.3745	0.087828	-3.50918	0.0936539	1	down	no
290348	i	chr8.3	.	64757585	64758056	MSTRG.152812.1	1	472	MSTRG.152812	MS.gene92097	17.7844	3.4142	0.0001	56.1502	21.6278	50.7279	0.164963	-2.59979	0.0937118	1	down	no
246351	u	chr7.3	.	12304622	12306365	MSTRG.129807.1	1	1744	MSTRG.129807	.	0.0001	0.234282	0.0001	1.5523	0.362101	1.14882	0.0765476	-3.7075	0.0938797	1	down	no
164983	u	chr4.4	.	70037594	70038066	MSTRG.87017.1	1	473	MSTRG.87017	.	2.48388	4.25464	4.20215	0.0001	0.828686	0.0001	13.1992	3.72238	0.0942981	1	up	no
243694	i	chr7.2	.	84627266	84627645	MSTRG.128444.1	1	380	MSTRG.128444	MS.gene057503	1.32505	4.7532	3.9164	0.572844	0.0001	0.0001	17.4413	4.12444	0.0943121	1	up	no
90148	u	chr3.1	.	57089231	57091089	MSTRG.47316.1	1	1859	MSTRG.47316	.	0.851621	2.91563	1.26235	0.478105	0.0001	0.0001	10.5155	3.39444	0.0943121	1	up	no
168953	u	chr5.1	+	13132547	13133756	MSTRG.89043.3	2	1011	MSTRG.89043	.	4.79149	1.13359	0.727005	0.0001	0.231888	0.426875	10.0963	3.33576	0.0944551	1	up	no
51305	u	chr1.4	+	86319445	86319944	MSTRG.27084.1	1	500	MSTRG.27084	.	7.97851	11.5084	7.18578	0.222313	3.02664	1.58297	5.5201	2.4647	0.0945004	1	up	no
108392	u	chr3.3	-	43567500	43568123	MSTRG.57001.1	1	624	MSTRG.57001	.	9.12696	2.47933	1.32512	1.1074	0.0001	0.0001	11.6752	3.54537	0.0945198	1	up	no
37103	u	chr1.3	+	49789356	49792923	MSTRG.19516.1	1	3568	MSTRG.19516	.	2.82538	1.41421	2.2495	5.86355	11.0624	6.50886	0.2769	-1.85256	0.0946548	1	down	no
205782	x	chr6.1	-	64037051	64076440	MSTRG.108087.1	2	269	MSTRG.108087	MS.gene042890	1.05981	0.0001	0.0001	1.55877	4.96303	9.43684	0.0664222	-3.91219	0.0949803	1	down	no
22823	x	chr1.2	+	12049131	12076165	MSTRG.11963.1	2	1856	MSTRG.11963	MS.gene54540	1.40288	1.13856	1.07837	4.07333	5.08458	4.83323	0.258722	-1.95053	0.0950409	1	down	no
293537	u	chr8.4	+	7089100	7092621	MSTRG.154483.2	4	931	MSTRG.154483	.	1.26722	3.69692	1.04121	0.656399	0.058783	0.046345	7.88593	2.97928	0.095073	1	up	no
[truncated: 62,685 more rows]
