# Supplementary material for: Integrated agronomic, physiological, microstructure, and whole-transcriptome analyses reveal the role of biomass accumulation and quality formation during Se biofortification in alfalfa
Source: Front Plant Sci. 2023 Jul 20;14:1198847. doi: 10.3389/fpls.2023.1198847 (PMC10400095; doi:10.3389/fpls.2023.1198847)
Supplement: Supplementary Table S5 — List of 5 DEcircRNAs in alfalfa under Se biofortification. [file Table_5.xlsx]

## Sheet: Sheet1
Accession	Low_Se1_srpbm	Low_Se2_srpbm	Low_Se3_srpbm	CK1_srpbm	CK2_srpbm	CK3_srpbm	Low_Se1_count	Low_Se2_count	Low_Se3_count	CK1_count	CK2_count	CK3_count	log2FoldChange	regulation	pvalue	qvalue	significant	chr	start	end	strand	exon Count	circType	isoformName	geneName	flankIntron	gene Discription	GO	KEGG	EC
circRNA28	0	0	0	1226.12	2343.31	949.827	0	0	0	106	101	85	-inf	down	0.000460934	0.0239685	yes	chr3.1	55485014	55585982	-	1	intergenic	intergenic_circRNA	intergenic_circRNA	chr3.1:55485013-55585982	NA	NA	NA	NA
circRNA22	0	0	0	104.105	116.005	78.221	0	0	0	9	5	7	-inf	down	0.0158695	0.374855	yes	chr1.4	50449172	50577160	-	1	intergenic	intergenic_circRNA	intergenic_circRNA	chr1.4:50449171-50577160	NA	NA	NA	NA
ciRNA104	52.2724	144.774	77.3117	0	0	0	3	12	5	0	0	0	inf	up	0.0235839	0.374855	yes	chr7.4	37075355	37095739	+	1	ciRNA	MS.gene055003.t1		chr7.4:37075354-37095739	receptor-like protein 13 isoform X2 [Medicago truncatula]	GO:0007165(signal transduction);GO:0016021(integral component of membrane)	NA	NA
circRNA24	0	0	0	34.7016	69.6032	122.919	0	0	0	3	3	11	-inf	down	0.0352033	0.374855	yes	chr1.4	50537617	50577160	-	1	intergenic	intergenic_circRNA	intergenic_circRNA	chr1.4:50537616-50577160	NA	NA	NA	NA
circRNA51	0	0	0	34.7016	92.8043	189.965	0	0	0	3	4	17	-inf	down	0.0360437	0.374855	yes	chr8.3	71889452	71897940	+	1	intergenic	intergenic_circRNA	intergenic_circRNA	chr8.3:71889451-71897940	NA	NA	NA	NA
circRNA296	0	48.2579	154.623	0	0	0	0	4	10	0	0	0	inf	up	0.0649916	0.45616	no	chr7.4	44791010	44792365	-	1	intergenic	intergenic_circRNA	intergenic_circRNA	chr7.4:44791009-44792365	NA	NA	NA	NA
circRNA262	104.545	120.645	0	0	0	0	6	10	0	0	0	0	inf	up	0.0671076	0.45616	no	chr3.3	13656049	13683495	+	1	intergenic	intergenic_circRNA	intergenic_circRNA	chr3.3:13656048-13683495	NA	NA	NA	NA
circRNA164	0	24.129	154.623	0	0	0	0	2	10	0	0	0	inf	up	0.0823954	0.45616	no	chr4.2	67758057	67956837	+	1	intergenic	intergenic_circRNA	intergenic_circRNA	chr4.2:67758056-67956837	NA	NA	NA	NA
circRNA173	87.1207	0	371.096	0	0	0	5	0	24	0	0	0	inf	up	0.0829597	0.45616	no	chr7.2	44706707	44891582	-	1	intergenic	intergenic_circRNA	intergenic_circRNA	chr7.2:44706706-44891582	NA	NA	NA	NA
circRNA85	0	0	0	0	185.609	167.616	0	0	0	0	8	15	-inf	down	0.0877231	0.45616	no	chr7.4	37074888	37268963	+	1	intergenic	intergenic_circRNA	intergenic_circRNA	chr7.4:37074887-37268963	NA	NA	NA	NA
circRNA169	0	108.58	61.8494	0	0	0	0	9	4	0	0	0	inf	up	0.12894	0.569899	no	chr5.3	10361484	10370447	-	1	intergenic	intergenic_circRNA	intergenic_circRNA	chr5.3:10361483-10370447	NA	NA	NA	NA
circRNA160	156.817	36.1935	0	0	0	0	9	3	0	0	0	0	inf	up	0.139894	0.569899	no	chr2.3	49182514	49218620	-	1	intergenic	intergenic_circRNA	intergenic_circRNA	chr2.3:49182513-49218620	NA	NA	NA	NA
circRNA206	0	60.3224	247.397	0	0	0	0	5	16	0	0	0	inf	up	0.144867	0.569899	no	chr7.2	81941482	81946885	+	1	intergenic	intergenic_circRNA	intergenic_circRNA	chr7.2:81941481-81946885	NA	NA	NA	NA
circRNA286	0	144.774	216.473	0	0	0	0	12	14	0	0	0	inf	up	0.155691	0.569899	no	chr1.4	21912577	21980218	+	1	intergenic	intergenic_circRNA	intergenic_circRNA	chr1.4:21912576-21980218	NA	NA	NA	NA
circRNA294	0	84.4514	262.86	0	0	0	0	7	17	0	0	0	inf	up	0.166273	0.569899	no	chr7.3	79296749	79432796	-	1	intergenic	intergenic_circRNA	intergenic_circRNA	chr7.3:79296748-79432796	NA	NA	NA	NA
circRNA152	34.8483	0	77.3117	0	0	0	2	0	5	0	0	0	inf	up	0.181795	0.569899	no	chr1.2	31076610	31084659	-	1	intergenic	intergenic_circRNA	intergenic_circRNA	chr1.2:31076609-31084659	NA	NA	NA	NA
circRNA190	0	120.645	30.9247	0	0	0	0	10	2	0	0	0	inf	up	0.186313	0.569899	no	chr1.2	36290105	36299942	+	1	intergenic	intergenic_circRNA	intergenic_circRNA	chr1.2:36290104-36299942	NA	NA	NA	NA
circRNA21	0	0	0	69.4032	0	67.0466	0	0	0	6	0	6	-inf	down	0.210322	0.607097	no	chr1.2	75717261	75732054	-	1	intergenic	intergenic_circRNA	intergenic_circRNA	chr1.2:75717260-75732054	NA	NA	NA	NA
circRNA82	0	0	0	0	46.4022	89.3955	0	0	0	0	2	8	-inf	down	0.233234	0.607097	no	chr7.2	88352589	88357460	+	1	intergenic	intergenic_circRNA	intergenic_circRNA	chr7.2:88352588-88357460	NA	NA	NA	NA
ciRNA62	69.6965	0	15.4623	0	0	0	4	0	1	0	0	0	inf	up	0.233499	0.607097	no	chr6.2	14391871	14392301	+	1	ciRNA	MS.gene074247.t1	MS.gene074247	chr6.2:14391870-14392326	RecName: Full=Ribulose bisphosphate carboxylase small chain, chloroplastic; Short=RuBisCO small subunit; Flags: Precursor	GO:0004497(monooxygenase activity);GO:0005507(copper ion binding);GO:0009409(response to cold);GO:0009507(chloroplast);GO:0009535(chloroplast thylakoid membrane);GO:0009536(plastid);GO:0009570(chloroplast stroma);GO:0009573(chloroplast ribulose bisphosphate carboxylase complex);GO:0009579(thylakoid);GO:0009637(response to blue light);GO:0009853(photorespiration);GO:0009941(chloroplast envelope);G…	00630(Glyoxylate and dicarboxylate metabolism);00710(Carbon fixation in photosynthetic organisms)	EC:4.1.1.39
circRNA36	0	0	0	34.7016	0	44.6977	0	0	0	3	0	4	-inf	down	0.253552	0.627843	no	chr4.3	77169057	77235328	-	1	intergenic	intergenic_circRNA	intergenic_circRNA	chr4.3:77169056-77235328	NA	NA	NA	NA
circRNA202	34.8483	24.129	0	0	0	0	2	2	0	0	0	0	inf	up	0.278154	0.657455	no	chr6.3	29705403	29784625	+	1	intergenic	intergenic_circRNA	intergenic_circRNA	chr6.3:29705402-29784625	NA	NA	NA	NA
circRNA31	0	313.677	185.548	46.2688	69.6032	0	0	26	12	4	3	0	2.10716	up	0.37271	0.810418	no	chr3.2	58789721	58800841	+	1	intergenic	intergenic_circRNA	intergenic_circRNA	chr3.2:58789720-58800841	NA	NA	NA	NA
circRNA25	0	120.645	0	566.793	0	212.314	0	10	0	49	0	19	-2.69106	down	0.374039	0.810418	no	chr2.1	24529912	24619705	+	1	intergenic	intergenic_circRNA	intergenic_circRNA	chr2.1:24529911-24619705	NA	NA	NA	NA
circRNA49	0	0	0	23.1344	0	22.3489	0	0	0	2	0	2	-inf	down	0.423461	0.849218	no	chr7.4	47254698	47394937	-	1	intergenic	intergenic_circRNA	intergenic_circRNA	chr7.4:47254697-47394937	NA	NA	NA	NA
circRNA13	34.8483	0	108.236	34.7016	0	11.1744	2	0	7	3	0	1	1.64106	up	0.424609	0.849218	no	chr3.3	95790515	95790804	-	2	circRNA	MS.gene063093.t1	MS.gene063093	chr3.3:95790443-95790514|chr3.3:95790804-95790875	60S ribosomal protein L5-2 [Medicago truncatula]	GO:0000027(ribosomal large subunit assembly);GO:0003735(structural constituent of ribosome);GO:0006412(translation);GO:0008097(5S rRNA binding);GO:0022625(cytosolic large ribosomal subunit)	03010(Ribosome)	NA
circRNA52	174.241	361.935	185.548	462.688	997.646	290.535	10	30	12	40	43	26	-1.27855	down	0.47829	0.890525	no	chr8.4	59196881	59203025	+	1	intergenic	intergenic_circRNA	intergenic_circRNA	chr8.4:59196880-59203025	NA	NA	NA	NA
circRNA126	0	0	30.9247	0	0	234.663	0	0	2	0	0	21	-2.92376	down	0.496573	0.890525	no	chr6.2	41499265	41499485	-	1	intergenic	intergenic_circRNA	intergenic_circRNA	chr6.2:41499264-41499485	NA	NA	NA	NA
circRNA9	34.8483	96.5159	61.8494	57.836	23.2011	11.1744	2	8	4	5	1	1	1.06718	up	0.496875	0.890525	no	chr3.1	92797816	92798105	-	2	circRNA	MS.gene68140.t1	MS.gene68140	chr3.1:92797744-92797815|chr3.1:92798105-92798179	60S ribosomal protein L5-2 [Medicago truncatula]	GO:0000027(ribosomal large subunit assembly);GO:0003735(structural constituent of ribosome);GO:0006412(translation);GO:0008097(5S rRNA binding);GO:0022625(cytosolic large ribosomal subunit)	03010(Ribosome)	NA
circRNA17	69.6965	0	0	80.9704	0	234.663	4	0	0	7	0	21	-2.17909	down	0.523535	0.890525	no	14523	59026	65475	+	1	intergenic	intergenic_circRNA	intergenic_circRNA	14523:59025-65475	NA	NA	NA	NA
circRNA8	34.8483	12.0645	30.9247	11.5672	23.2011	0	2	1	2	1	1	0	1.16269	up	0.53089	0.890525	no	chr3.4	100101449	100101738	-	2	circRNA	MS.gene014204.t1	MS.gene014204	chr3.4:100101377-100101448|chr3.4:100101738-100101811	60S ribosomal protein L5-2 [Medicago truncatula]	GO:0000027(ribosomal large subunit assembly);GO:0003735(structural constituent of ribosome);GO:0006412(translation);GO:0008097(5S rRNA binding);GO:0022625(cytosolic large ribosomal subunit)	03010(Ribosome)	NA
circRNA30	87.1207	0	0	138.806	0	245.838	5	0	0	12	0	22	-2.14244	down	0.563215	0.915225	no	chr3.2	13417239	13423560	+	1	intergenic	intergenic_circRNA	intergenic_circRNA	chr3.2:13417238-13423560	NA	NA	NA	NA
circRNA48	34.8483	0	262.86	150.374	0	0	2	0	17	13	0	0	0.985346	up	0.642127	0.98546	no	chr7.4	37271809	37384504	+	1	intergenic	intergenic_circRNA	intergenic_circRNA	chr7.4:37271808-37384504	NA	NA	NA	NA
circRNA69	243.938	229.225	77.3117	0	185.609	122.919	14	19	5	0	8	11	0.835278	up	0.64434	0.98546	no	chr3.2	58538882	58615448	+	1	intergenic	intergenic_circRNA	intergenic_circRNA	chr3.2:58538881-58615448	NA	NA	NA	NA
circRNA40	87.1207	193.032	61.8494	196.643	0	0	5	16	4	17	0	0	0.798429	up	0.694605	1	no	chr5.2	60265708	60277775	+	1	intergenic	intergenic_circRNA	intergenic_circRNA	chr5.2:60265707-60277775	NA	NA	NA	NA
circRNA20	0	36.1935	0	23.1344	0	44.6977	0	3	0	2	0	4	-0.90624	down	0.723721	1	no	43378	324669	417244	-	1	intergenic	intergenic_circRNA	intergenic_circRNA	43378:324668-417244	NA	NA	NA	NA
circRNA113	52.2724	0	0	0	0	122.919	3	0	0	0	0	11	-1.23358	down	0.789014	1	no	chr1.4	21353271	21450346	+	1	intergenic	intergenic_circRNA	intergenic_circRNA	chr1.4:21353270-21450346	NA	NA	NA	NA
circRNA64	0	0	30.9247	0	23.2011	0	0	0	2	0	1	0	0.414567	up	0.825135	1	no	chr1.1	64134901	64135675	+	3	circRNA	MS.gene005479.t1	MS.gene005479	chr1.1:64134079-64134900|chr1.1:64135675-64137222	uncharacterized protein LOC11426607 [Medicago truncatula]	GO:0003674(molecular_function);GO:0005634(nucleus);GO:0008150(biological_process)	NA	NA
circRNA77	0	156.838	61.8494	0	162.408	0	0	13	4	0	7	0	0.429254	up	0.854496	1	no	chr5.2	60266975	60278322	+	1	intergenic	intergenic_circRNA	intergenic_circRNA	chr5.2:60266974-60278322	NA	NA	NA	NA
circRNA19	0	0	185.548	150.374	0	223.489	0	0	12	13	0	20	-1.01071	down	0.893332	1	no	42997	987	17654	+	1	intergenic	intergenic_circRNA	intergenic_circRNA	42997:986-17654	NA	NA	NA	NA
circRNA26	69.6965	0	0	46.2688	69.6032	0	4	0	0	4	3	0	-0.733373	down	0.931421	1	no	chr2.3	52530615	52575579	+	1	intergenic	intergenic_circRNA	intergenic_circRNA	chr2.3:52530614-52575579	NA	NA	NA	NA
circRNA43	0	84.4514	30.9247	104.105	0	0	0	7	2	9	0	0	0.148307	up	0.934034	1	no	chr6.3	11365465	11492453	+	1	intergenic	intergenic_circRNA	intergenic_circRNA	chr6.3:11365464-11492453	NA	NA	NA	NA
circRNA83	261.362	0	0	0	208.81	0	15	0	0	0	9	0	0.323861	up	0.93693	1	no	chr7.3	79524956	79618466	+	1	intergenic	intergenic_circRNA	intergenic_circRNA	chr7.3:79524955-79618466	NA	NA	NA	NA
circRNA45	0	0	123.699	104.105	139.206	0	0	0	8	9	6	0	-0.975972	down	0.945338	1	no	chr7.2	19943254	20034376	-	1	intergenic	intergenic_circRNA	intergenic_circRNA	chr7.2:19943253-20034376	NA	NA	NA	NA
circRNA123	104.545	0	0	0	0	78.221	6	0	0	0	0	7	0.418493	up	1	1	no	chr4.2	22925605	22984890	-	1	intergenic	intergenic_circRNA	intergenic_circRNA	chr4.2:22925604-22984890	NA	NA	NA	NA
circRNA194	0	72.3869	0	0	0	0	0	6	0	0	0	0	inf	up	1	1	no	chr3.1	12937420	12988135	-	1	intergenic	intergenic_circRNA	intergenic_circRNA	chr3.1:12937419-12988135	NA	NA	NA	NA
circRNA268	191.666	0	0	0	0	0	11	0	0	0	0	0	inf	up	1	1	no	chr7.3	79525004	79618466	+	1	intergenic	intergenic_circRNA	intergenic_circRNA	chr7.3:79525003-79618466	NA	NA	NA	NA
circRNA200	0	0	0	0	0	0	0	0	0	0	0	0	0	no	1	1	no	chr6.3	872858	901293	-	1	intergenic	intergenic_circRNA	intergenic_circRNA	chr6.3:872857-901293	NA	NA	NA	NA
circRNA254	17.4241	0	0	0	0	0	1	0	0	0	0	0	inf	up	1	1	no	chr1.3	63003831	63004301	-	2	circRNA	MS.gene21579.t1	MS.gene21579	chr1.3:63003666-63003830|chr1.3:63004301-63004931	general transcription and DNA repair factor IIH subunit TFB1-1 [Medicago truncatula]	GO:0000439(core TFIIH complex);GO:0005634(nucleus);GO:0006281(DNA repair);GO:0006289(nucleotide-excision repair);GO:0006351(transcription, DNA-templated)	03022(Basal transcription factors);03420(Nucleotide excision repair)	NA
circRNA98	0	0	0	0	0	22.3489	0	0	0	0	0	2	-inf	down	1	1	no	chr4.4	8307520	8308547	+	3	circRNA	MS.gene49679.t1	MS.gene49679	chr4.4:8307064-8307519|chr4.4:8308547-8308730	uncharacterized protein LOC100812465 [Glycine max]	GO:0003735(structural constituent of ribosome);GO:0022627(cytosolic small ribosomal subunit)	03030(DNA replication);03420(Nucleotide excision repair);03430(Mismatch repair);03440(Homologous recombination)	NA
circRNA16	0	0	0	11.5672	0	0	0	0	0	1	0	0	-inf	down	1	1	no	chr7.3	23169165	23170073	-	2	circRNA	MS.gene08226.t1	MS.gene08226	chr7.3:23168210-23169164|chr7.3:23170073-23171163	CCR4-NOT transcription complex subunit 3 isoform X1 [Medicago truncatula]	GO:0000288(nuclear-transcribed mRNA catabolic process, deadenylation-dependent decay);GO:0000932(P-body);GO:0017148(negative regulation of translation);GO:0030015(CCR4-NOT core complex)	03018(RNA degradation)	NA
circRNA4	0	0	0	11.5672	0	0	0	0	0	1	0	0	-inf	down	1	1	no	chr6.4	8283180	8283458	+	1	circRNA	MS.gene48157.t1	MS.gene48157	chr6.4:8275794-8283179|chr6.4:8283458-8284795	squalene monooxygenase [Medicago truncatula]	GO:0004506(squalene monooxygenase activity);GO:0005576(extracellular region);GO:0005783(endoplasmic reticulum);GO:0009414(response to water deprivation);GO:0016021(integral component of membrane);GO:0016126(sterol biosynthetic process);GO:0050660(flavin adenine dinucleotide binding);GO:0055114(oxidation-reduction process)	00100(Steroid biosynthesis);00909(Sesquiterpenoid and triterpenoid biosynthesis)	EC:1.14.14.17
ciRNA106	0	24.129	0	0	0	0	0	2	0	0	0	0	inf	up	1	1	no	chr2.1	47713054	47713222	+	1	ciRNA	MS.gene85387.t1	MS.gene85387	chr2.1:47713053-47713248	beta-galactosidase [Medicago truncatula]	GO:0004565(beta-galactosidase activity);GO:0005618(cell wall);GO:0005773(vacuole)	00052(Galactose metabolism);00600(Sphingolipid metabolism);00531(Glycosaminoglycan degradation);00604(Glycosphingolipid biosynthesis - ganglio series);00511(Other glycan degradation)	EC:3.2.1.23
ciRNA27	0	0	0	0	0	33.5233	0	0	0	0	0	3	-inf	down	1	1	no	chr6.3	14081015	14081439	+	1	ciRNA	MS.gene074568.t1	MS.gene074568	chr6.3:14081014-14081466	RecName: Full=Ribulose bisphosphate carboxylase small chain, chloroplastic; Short=RuBisCO small subunit; Flags: Precursor	GO:0004497(monooxygenase activity);GO:0005507(copper ion binding);GO:0009409(response to cold);GO:0009507(chloroplast);GO:0009535(chloroplast thylakoid membrane);GO:0009536(plastid);GO:0009570(chloroplast stroma);GO:0009573(chloroplast ribulose bisphosphate carboxylase complex);GO:0009579(thylakoid);GO:0009637(response to blue light);GO:0009853(photorespiration);GO:0009941(chloroplast envelope);G…	00630(Glyoxylate and dicarboxylate metabolism);00710(Carbon fixation in photosynthetic organisms)	EC:4.1.1.39
ciRNA6	0	0	0	11.5672	0	0	0	0	0	1	0	0	-inf	down	1	1	no	chr3.2	68577285	68577758	+	1	ciRNA	MS.gene29372.t1	MS.gene29372	chr3.2:68577284-68577795	uncharacterized protein LOC11438490 isoform X1 [Medicago truncatula]	GO:0003674(molecular_function);GO:0008150(biological_process);GO:0009507(chloroplast);GO:0016021(integral component of membrane)	NA	NA
ciRNA69	0	0	0	0	0	0	0	0	0	0	0	0	0	no	1	1	no	chr4.3	89797278	89797430	-	1	ciRNA	MS.gene50093.t1	MS.gene50093	chr4.3:89796761-89797430	uncharacterized protein LOC11425089 isoform X1 [Medicago truncatula]	GO:0003723(RNA binding);GO:0003729(mRNA binding);GO:0005634(nucleus);GO:0005829(cytosol);GO:0008150(biological_process)	NA	NA
circRNA47	0	0	0	46.2688	0	0	0	0	0	4	0	0	-inf	down	1	1	no	chr7.2	90369230	90433552	+	1	intergenic	intergenic_circRNA	intergenic_circRNA	chr7.2:90369229-90433552	NA	NA	NA	NA
circRNA38	0	0	0	46.2688	0	0	0	0	0	4	0	0	-inf	down	1	1	no	chr4.4	84162548	84274188	-	1	intergenic	intergenic_circRNA	intergenic_circRNA	chr4.4:84162547-84274188	NA	NA	NA	NA
circRNA1	0	0	0	11.5672	0	0	0	0	0	1	0	0	-inf	down	1	1	no	chr2.3	12795954	12796632	-	2	circRNA	MS.gene073079.t1	MS.gene073079	chr2.3:12795727-12795953|chr2.3:12796632-12796714	peptidyl-prolyl cis-trans isomerase CYP71 [Medicago truncatula]	GO:0003755(peptidyl-prolyl cis-trans isomerase activity)	NA	NA
ciRNA33	0	0	0	0	0	22.3489	0	0	0	0	0	2	-inf	down	1	1	no	chr3.2	78490164	78490344	+	1	ciRNA	MS.gene06564.t1	MS.gene06564	chr3.2:78490163-78490362	SET and MYND domain-containing protein 4 isoform X1 [Medicago truncatula]	GO:0005634(nucleus);GO:0008150(biological_process)	NA	NA
ciRNA110	0	12.0645	0	0	0	0	0	1	0	0	0	0	inf	up	1	1	no	chr8.1	73585743	73586223	+	1	ciRNA	MS.gene59617.t1	MS.gene59617	chr8.1:73585742-73586243	BTB/POZ domain-containing protein POB1 isoform X2 [Medicago truncatula]	GO:0004842(ubiquitin-protein transferase activity);GO:0005634(nucleus);GO:0010114(response to red light);GO:0031463(Cul3-RING ubiquitin ligase complex)	00562(Inositol phosphate metabolism);04070(Phosphatidylinositol signaling system)	EC:3.1.3.25
circRNA278	0	12.0645	0	0	0	0	0	1	0	0	0	0	inf	up	1	1	no	chr4.1	27700599	27702149	-	5	circRNA	MS.gene006499.t1	MS.gene006499	chr4.1:27700049-27700598|chr4.1:27702149-27702461	uncharacterized protein LOC11441638 [Medicago truncatula]	NA	NA	NA
ciRNA126	0	0	15.4623	0	0	0	0	0	1	0	0	0	inf	up	1	1	no	chr3.1	85211432	85212085	-	1	ciRNA	MS.gene32606.t1	MS.gene32606	chr3.1:85211412-85212085	GTP-binding nuclear protein Ran/TC4 [Medicago truncatula]	GO:0000054(ribosomal subunit export from nucleus);GO:0003924(GTPase activity);GO:0005634(nucleus);GO:0005737(cytoplasm);GO:0006606(protein import into nucleus)	03013(RNA transport);03008(Ribosome biogenesis in eukaryotes)	NA
ciRNA36	0	0	0	0	0	33.5233	0	0	0	0	0	3	-inf	down	1	1	no	chr1.4	37574708	37575068	-	1	ciRNA	MS.gene84079.t1	MS.gene84079	chr1.4:37574680-37575068	exportin-7 isoform X2 [Medicago truncatula]	GO:0005049(nuclear export signal receptor activity);GO:0005643(nuclear pore);GO:0005737(cytoplasm);GO:0006611(protein export from nucleus);GO:0008536(Ran GTPase binding)	NA	NA
ciRNA65	0	0	0	0	0	0	0	0	0	0	0	0	0	no	1	1	no	21095	39211	39366	-	1	ciRNA	MS.gene50853.t1	MS.gene50853	21095:38214-39366	cinnamoyl-CoA reductase 1 [Medicago truncatula]	GO:0004022(alcohol dehydrogenase (NAD) activity);GO:0005794(Golgi apparatus);GO:0005829(cytosol);GO:0005886(plasma membrane);GO:0009506(plasmodesma);GO:0050662(coenzyme binding)	00940(Phenylpropanoid biosynthesis)	EC:1.2.1.44
circRNA246	0	0	0	0	0	0	0	0	0	0	0	0	0	no	1	1	no	chr8.2	43649528	43672227	-	1	intergenic	intergenic_circRNA	intergenic_circRNA	chr8.2:43649527-43672227	NA	NA	NA	NA
circRNA175	0	0	0	0	0	0	0	0	0	0	0	0	0	no	1	1	no	chr7.3	66388640	66389794	+	1	intergenic	intergenic_circRNA	intergenic_circRNA	chr7.3:66388639-66389794	NA	NA	NA	NA
circRNA209	0	0	0	0	0	0	0	0	0	0	0	0	0	no	1	1	no	chr7.4	92289105	92305062	-	1	intergenic	intergenic_circRNA	intergenic_circRNA	chr7.4:92289104-92305062	NA	NA	NA	NA
circRNA244	0	0	0	0	0	0	0	0	0	0	0	0	0	no	1	1	no	chr6.3	24311546	24319558	-	1	intergenic	intergenic_circRNA	intergenic_circRNA	chr6.3:24311545-24319558	NA	NA	NA	NA
circRNA270	52.2724	0	0	0	0	0	3	0	0	0	0	0	inf	up	1	1	no	chr6.1	12944135	12944294	+	1	circRNA	MS.gene019946.t1		chr6.1:12942801-12943437|chr6.1:12944294-12944566	uncharacterized protein LOC25495914 isoform X1 [Medicago truncatula]	GO:0000122(negative regulation of transcription by RNA polymerase II);GO:0003677(DNA binding);GO:0003700(DNA binding transcription factor activity);GO:0005515(protein binding);GO:0005634(nucleus);GO:0008380(RNA splicing);GO:0010582(floral meristem determinacy);GO:1900055(regulation of leaf senescence);GO:1990619(histone H3-K9 deacetylation);GO:2000617(positive regulation of histone H3-K9 acetylat…	NA	NA
circRNA111	0	0	0	0	0	22.3489	0	0	0	0	0	2	-inf	down	1	1	no	chr5.2	50714742	50715979	-	3	circRNA	MS.gene73935.t1	MS.gene73935	chr5.2:50712977-50714741|chr5.2:50715979-50723895	mitogen-activated protein kinase kinase kinase 1 [Medicago truncatula]	GO:0005737(cytoplasm)	04016(MAPK signaling pathway - plant);04626(Plant-pathogen interaction)	EC:2.7.11.25
ciRNA117	0	12.0645	0	0	0	0	0	1	0	0	0	0	inf	up	1	1	no	chr7.1	65028981	65030376	+	1	ciRNA	MS.gene040231.t1	MS.gene040231	chr7.1:65028980-65030405	proteasome subunit beta type-7-B [Medicago truncatula]	GO:0000502(proteasome complex);GO:0004298(threonine-type endopeptidase activity);GO:0005634(nucleus);GO:0005737(cytoplasm);GO:0005839(proteasome core complex);GO:0006511(ubiquitin-dependent protein catabolic process);GO:0008233(peptidase activity);GO:0010499(proteasomal ubiquitin-independent protein catabolic process);GO:0051603(proteolysis involved in cellular protein catabolic process)	03050(Proteasome)	EC:3.4.25.1
circRNA199	0	0	0	0	0	0	0	0	0	0	0	0	0	no	1	1	no	chr5.4	72182457	72324042	-	1	intergenic	intergenic_circRNA	intergenic_circRNA	chr5.4:72182456-72324042	NA	NA	NA	NA
circRNA74	0	0	0	0	46.4022	0	0	0	0	0	2	0	-inf	down	1	1	no	chr4.3	66664747	66747021	-	1	intergenic	intergenic_circRNA	intergenic_circRNA	chr4.3:66664746-66747021	NA	NA	NA	NA
circRNA309	0	0	15.4623	0	0	0	0	0	1	0	0	0	inf	up	1	1	no	chr4.1	38142481	38143649	+	4	circRNA	MS.gene08571.t1	MS.gene08571	chr4.1:38142071-38142480|chr4.1:38143649-38143958	ascorbate peroxidase isoform 2 [Medicago sativa]	GO:0000302(response to reactive oxygen species);GO:0004130(cytochrome-c peroxidase activity);GO:0004601(peroxidase activity);GO:0005618(cell wall);GO:0005737(cytoplasm);GO:0005794(Golgi apparatus);GO:0005829(cytosol);GO:0005886(plasma membrane);GO:0006979(response to oxidative stress);GO:0009408(response to heat);GO:0009506(plasmodesma);GO:0009507(chloroplast);GO:0009570(chloroplast stroma);GO:00…	00053(Ascorbate and aldarate metabolism);00480(Glutathione metabolism)	EC:1.11.1.11
circRNA134	0	0	0	0	0	0	0	0	0	0	0	0	0	no	1	1	no	chr2.1	58155669	58156851	+	4	circRNA	MS.gene00191.t1	MS.gene00191	chr2.1:58155235-58155668|chr2.1:58156851-58157158	calmodulin-binding transcription activator 5 [Medicago truncatula]	GO:0005634(nucleus);GO:0043565(sequence-specific DNA binding);GO:0045944(positive regulation of transcription by RNA polymerase II)	NA	NA
circRNA95	0	0	0	0	0	22.3489	0	0	0	0	0	2	-inf	down	1	1	no	chr8.2	70542551	70543881	-	2	circRNA	MS.gene067279.t1	MS.gene067279	chr8.2:70542202-70542550|chr8.2:70543881-70544261	putative transcription factor WD40-like family [Medicago truncatula]	GO:0007035(vacuolar acidification);GO:0008593(regulation of Notch signaling pathway);GO:0035149(lumen formation, open tracheal system);GO:0043291(RAVE complex);GO:0070072(vacuolar proton-transporting V-type ATPase complex assembly)	NA	NA
ciRNA72	0	0	0	0	0	0	0	0	0	0	0	0	0	no	1	1	no	chr1.2	36593298	36593515	+	1	ciRNA	MS.gene018885.t1	MS.gene018885	chr1.2:36593297-36593541	putative magnesium chelatase [Medicago truncatula]	GO:0005515(protein binding);GO:0005524(ATP binding);GO:0005739(mitochondrion);GO:0009507(chloroplast);GO:0009570(chloroplast stroma);GO:0009706(chloroplast inner membrane);GO:0010007(magnesium chelatase complex);GO:0015979(photosynthesis);GO:0015995(chlorophyll biosynthetic process);GO:0016851(magnesium chelatase activity)	00860(Porphyrin and chlorophyll metabolism)	EC:6.6.1.1
circRNA216	0	0	0	0	0	0	0	0	0	0	0	0	0	no	1	1	no	chr2.4	60879161	60882480	+	8	circRNA	MS.gene073354.t1	MS.gene073354	None|chr2.4:60882480-60884055	isoleucine--tRNA ligase, chloroplastic/mitochondrial [Medicago truncatula]	GO:0004822(isoleucine-tRNA ligase activity);GO:0005739(mitochondrion);GO:0005829(cytosol);GO:0006428(isoleucyl-tRNA aminoacylation)	00970(Aminoacyl-tRNA biosynthesis)	EC:6.1.1.5
ciRNA85	0	0	0	0	0	0	0	0	0	0	0	0	0	no	1	1	no	chr8.4	75847782	75848680	+	1	ciRNA	MS.gene36567.t1	MS.gene36567	chr8.4:75847781-75848700	NADP-specific glutamate dehydrogenase isoform X1 [Medicago truncatula]	GO:0005737(cytoplasm);GO:0016491(oxidoreductase activity);GO:0055114(oxidation-reduction process)	00910(Nitrogen metabolism);00250(Alanine, aspartate and glutamate metabolism);00220(Arginine biosynthesis)	EC:1.4.1.4
ciRNA99	17.4241	0	0	0	0	0	1	0	0	0	0	0	inf	up	1	1	no	chr4.2	23312750	23313801	+	1	ciRNA	MS.gene39554.t1	MS.gene39554	chr4.2:23312749-23313824	apoptosis inhibitor 5-like protein API5 [Medicago truncatula]	GO:0003729(mRNA binding);GO:0005634(nucleus);GO:0005829(cytosol);GO:0009506(plasmodesma)	NA	NA
circRNA46	0	0	0	57.836	0	0	0	0	0	5	0	0	-inf	down	1	1	no	chr7.2	81900082	81949731	-	1	intergenic	intergenic_circRNA	intergenic_circRNA	chr7.2:81900081-81949731	NA	NA	NA	NA
circRNA154	0	0	0	0	0	0	0	0	0	0	0	0	0	no	1	1	no	chr1.4	50435625	50577160	-	1	intergenic	intergenic_circRNA	intergenic_circRNA	chr1.4:50435624-50577160	NA	NA	NA	NA
circRNA251	17.4241	0	0	0	0	0	1	0	0	0	0	0	inf	up	1	1	no	chr4.1	6482455	6483070	+	3	circRNA	MS.gene79459.t1	MS.gene79459	chr4.1:6481955-6482454|chr4.1:6483070-6483320	probable serine/threonine-protein kinase At1g54610 [Medicago truncatula]	GO:0004672(protein kinase activity);GO:0004674(protein serine/threonine kinase activity);GO:0005886(plasma membrane);GO:0006468(protein phosphorylation);GO:0046777(protein autophosphorylation)	NA	NA
circRNA60	0	0	0	0	23.2011	0	0	0	0	0	1	0	-inf	down	1	1	no	chr8.1	41967426	41967588	+	1	circRNA	MS.gene009218.t1	MS.gene009218	chr8.1:41967105-41967425|chr8.1:41967588-41968781	cinnamyl alcohol dehydrogenase [Medicago truncatula]	GO:0004022(alcohol dehydrogenase (NAD) activity);GO:0005794(Golgi apparatus);GO:0005829(cytosol);GO:0005886(plasma membrane);GO:0009506(plasmodesma);GO:0050662(coenzyme binding)	00940(Phenylpropanoid biosynthesis)	EC:1.2.1.44
circRNA318	0	0	46.387	0	0	0	0	0	3	0	0	0	inf	up	1	1	no	chr4.4	83855169	83921678	-	1	intergenic	intergenic_circRNA	intergenic_circRNA	chr4.4:83855168-83921678	NA	NA	NA	NA
ciRNA15	0	0	0	46.2688	0	0	0	0	0	4	0	0	-inf	down	1	1	no	chr4.4	18849098	18849252	-	1	ciRNA	MS.gene35197.t1		chr4.4:18849097-18849252	UDP-D-xylose:L-fucose alpha-1,3-D-xylosyltransferase MGP4 [Medicago truncatula]	GO:0005794(Golgi apparatus);GO:0035252(UDP-xylosyltransferase activity);GO:0042546(cell wall biogenesis)	NA	NA
circRNA104	0	0	0	0	0	33.5233	0	0	0	0	0	3	-inf	down	1	1	no	33143	10143	11433	+	2	circRNA	MS.gene037487.t1	MS.gene037487	33143:9138-10142|33143:11433-11625	protein NRDE2 homolog isoform X2 [Medicago truncatula]	GO:0003674(molecular_function);GO:0005634(nucleus);GO:0006396(RNA processing)	NA	NA
circRNA310	0	0	15.4623	0	0	0	0	0	1	0	0	0	inf	up	1	1	no	chr3.4	4263977	4264408	+	2	circRNA	MS.gene51627.t1	MS.gene51627	chr3.4:4263895-4263976|chr3.4:4264408-4265380	ankyrin repeat domain-containing protein 2B [Medicago truncatula]	GO:0005515(protein binding);GO:0005634(nucleus);GO:0005737(cytoplasm);GO:0005886(plasma membrane);GO:0006355(regulation of transcription, DNA-templated);GO:0008289(lipid binding);GO:0030941(chloroplast targeting sequence binding);GO:0031359(integral component of chloroplast outer membrane);GO:0045036(protein targeting to chloroplast)	NA	NA
circRNA76	0	0	0	0	92.8043	0	0	0	0	0	4	0	-inf	down	1	1	no	chr5.1	42241395	42347930	+	1	intergenic	intergenic_circRNA	intergenic_circRNA	chr5.1:42241394-42347930	NA	NA	NA	NA
ciRNA24	0	0	0	0	23.2011	0	0	0	0	0	1	0	-inf	down	1	1	no	chr7.1	73274812	73275422	-	1	ciRNA	MS.gene044964.t1	MS.gene044964	chr7.1:73274781-73275422	heat shock cognate 70 kDa protein 2 [Medicago truncatula]	GO:0005524(ATP binding);GO:0005618(cell wall);GO:0005634(nucleus);GO:0005739(mitochondrion);GO:0005774(vacuolar membrane);GO:0005794(Golgi apparatus);GO:0005829(cytosol);GO:0005886(plasma membrane);GO:0006351(transcription, DNA-templated);GO:0006355(regulation of transcription, DNA-templated);GO:0006457(protein folding);GO:0006986(response to unfolded protein);GO:0009266(response to temperature s…	03040(Spliceosome);04141(Protein processing in endoplasmic reticulum);04144(Endocytosis)	NA
ciRNA40	0	0	0	0	0	0	0	0	0	0	0	0	0	no	1	1	no	chr2.2	64902542	64903024	-	1	ciRNA	MS.gene96209.t1	MS.gene96209	chr2.2:64902519-64903024	lipase isoform X1 [Medicago truncatula]	GO:0004806(triglyceride lipase activity);GO:0005576(extracellular region);GO:0006629(lipid metabolic process);GO:0016787(hydrolase activity)	NA	NA
circRNA119	0	0	0	0	0	22.3489	0	0	0	0	0	2	-inf	down	1	1	no	chr3.1	85759938	85823803	+	1	intergenic	intergenic_circRNA	intergenic_circRNA	chr3.1:85759937-85823803	NA	NA	NA	NA
circRNA315	0	0	108.236	0	0	0	0	0	7	0	0	0	inf	up	1	1	no	chr3.1	5009931	5030062	+	1	intergenic	intergenic_circRNA	intergenic_circRNA	chr3.1:5009930-5030062	NA	NA	NA	NA
circRNA141	0	0	0	0	0	0	0	0	0	0	0	0	0	no	1	1	no	chr1.2	55707513	55707704	+	1	circRNA	MS.gene32091.t1	MS.gene32091	chr1.2:55707303-55707512|chr1.2:55707704-55707869	RRP12-like protein isoform X1 [Medicago truncatula]	GO:0005634(nucleus);GO:0008150(biological_process)	NA	NA
ciRNA19	0	0	0	0	23.2011	0	0	0	0	0	1	0	-inf	down	1	1	no	chr6.3	2609034	2609517	+	1	ciRNA	MS.gene34168.t1	MS.gene34168	chr6.3:2609033-2609544	carbonic anhydrase, chloroplastic isoform X1 [Medicago truncatula]	GO:0004089(carbonate dehydratase activity);GO:0005886(plasma membrane);GO:0008270(zinc ion binding);GO:0009409(response to cold);GO:0009507(chloroplast);GO:0009535(chloroplast thylakoid membrane);GO:0009570(chloroplast stroma);GO:0009579(thylakoid);GO:0009817(defense response to fungus, incompatible interaction);GO:0009941(chloroplast envelope);GO:0010037(response to carbon dioxide);GO:0010119(re…	00910(Nitrogen metabolism)	EC:4.2.1.1
circRNA55	0	0	0	0	23.2011	0	0	0	0	0	1	0	-inf	down	1	1	no	chr2.1	39686011	39687339	-	3	circRNA	MS.gene97272.t1	MS.gene97272	chr2.1:39685201-39686010|chr2.1:39687339-39688149	protein TSS isoform X1 [Medicago truncatula]	GO:0005634(nucleus);GO:0005737(cytoplasm);GO:0005829(cytosol)	NA	NA
circRNA301	0	0	15.4623	0	0	0	0	0	1	0	0	0	inf	up	1	1	no	chr2.4	26788773	26789475	-	1	circRNA	MS.gene039066.t1	MS.gene039066	chr2.4:26780775-26788772|chr2.4:26789475-26789575	G-type lectin S-receptor-like serine/threonine-protein kinase LECRK3 [Medicago truncatula]	GO:0004674(protein serine/threonine kinase activity);GO:0005886(plasma membrane);GO:0006468(protein phosphorylation)	NA	NA
ciRNA58	0	0	0	0	0	0	0	0	0	0	0	0	0	no	1	1	no	chr5.4	72991622	72991889	-	1	ciRNA	MS.gene038382.t1	MS.gene038382	chr5.4:72991600-72991889	uncharacterized protein LOC11437066 [Medicago truncatula]	GO:0005777(peroxisome);GO:0009408(response to heat)	04141(Protein processing in endoplasmic reticulum)	NA
circRNA225	0	0	0	0	0	0	0	0	0	0	0	0	0	no	1	1	no	chr5.1	49629387	49632586	-	9	circRNA	MS.gene64147.t1	MS.gene64147	chr5.1:49628919-49629386|chr5.1:49632586-49633359	O-fucosyltransferase 7 [Medicago truncatula]	GO:0005737(cytoplasm)	NA	NA
circRNA203	0	0	0	0	0	0	0	0	0	0	0	0	0	no	1	1	no	chr6.3	29782432	29784625	+	1	intergenic	intergenic_circRNA	intergenic_circRNA	chr6.3:29782431-29784625	NA	NA	NA	NA
circRNA238	0	0	0	0	0	0	0	0	0	0	0	0	0	no	1	1	no	chr4.2	85233983	85279949	-	1	intergenic	intergenic_circRNA	intergenic_circRNA	chr4.2:85233982-85279949	NA	NA	NA	NA
ciRNA28	0	0	0	0	0	11.1744	0	0	0	0	0	1	-inf	down	1	1	no	chr6.3	23228675	23229000	+	1	ciRNA	MS.gene74675.t1	MS.gene74675	chr6.3:23228674-23229022	histidinol-phosphate aminotransferase, chloroplastic [Medicago truncatula]	GO:0000105(histidine biosynthetic process);GO:0004400(histidinol-phosphate transaminase activity);GO:0005737(cytoplasm);GO:0009507(chloroplast);GO:0009570(chloroplast stroma)	00340(Histidine metabolism);00350(Tyrosine metabolism);00360(Phenylalanine metabolism);00400(Phenylalanine, tyrosine and tryptophan biosynthesis);00960(Tropane, piperidine and pyridine alkaloid biosynthesis)	EC:2.6.1.9
circRNA232	0	0	0	0	0	0	0	0	0	0	0	0	0	no	1	1	no	chr3.1	21927854	21941777	-	1	intergenic	intergenic_circRNA	intergenic_circRNA	chr3.1:21927853-21941777	NA	NA	NA	NA
circRNA12	0	0	0	11.5672	0	0	0	0	0	1	0	0	-inf	down	1	1	no	chr3.3	66840736	66841955	+	1	circRNA	MS.gene022228.t1	MS.gene022228	chr3.3:66835619-66840735|chr3.3:66841955-66844353	flowering time control protein FPA isoform X1 [Medicago truncatula]	GO:0000398(mRNA splicing, via spliceosome);GO:0003676(nucleic acid binding);GO:0005634(nucleus)	NA	NA
circRNA7	0	0	15.4623	11.5672	0	0	0	0	1	1	0	0	0.418719	up	1	1	no	chr4.4	37534272	37535281	+	3	circRNA	MS.gene23322.t1	MS.gene23322	chr4.4:37533391-37534271|chr4.4:37535281-37536403	V-type proton ATPase subunit a3 [Medicago truncatula]	GO:0000325(plant-type vacuole);GO:0007035(vacuolar acidification);GO:0015986(ATP synthesis coupled proton transport);GO:0016471(vacuolar proton-transporting V-type ATPase complex);GO:0046961(proton-transporting ATPase activity, rotational mechanism);GO:0051117(ATPase binding);GO:0070072(vacuolar proton-transporting V-type ATPase complex assembly)	00190(Oxidative phosphorylation);04145(Phagosome)	NA
ciRNA46	0	0	0	0	0	0	0	0	0	0	0	0	0	no	1	1	no	chr3.4	83131678	83131931	+	1	ciRNA	MS.gene013634.t1	MS.gene013634	chr3.4:83131677-83131954	mitochondrial carrier protein MTM1 isoform X1 [Medicago truncatula]	GO:0003735(structural constituent of ribosome);GO:0006412(translation)	NA	NA
circRNA112	0	0	0	0	0	33.5233	0	0	0	0	0	3	-inf	down	1	1	no	chr1.4	15992336	15994149	-	1	intergenic	intergenic_circRNA	intergenic_circRNA	chr1.4:15992335-15994149	NA	NA	NA	NA
circRNA297	0	36.1935	0	0	0	0	0	3	0	0	0	0	inf	up	1	1	no	chr8.2	41579368	41614990	+	1	intergenic	intergenic_circRNA	intergenic_circRNA	chr8.2:41579367-41614990	NA	NA	NA	NA
circRNA213	0	0	0	0	0	0	0	0	0	0	0	0	0	no	1	1	no	chr2.1	67949605	67950136	+	2	circRNA	MS.gene002714.t1	MS.gene002714	chr2.1:67948695-67949604|chr2.1:67950136-67953880	ABC transporter C family member 2 [Medicago truncatula]	GO:0000325(plant-type vacuole);GO:0005516(calmodulin binding);GO:0005524(ATP binding);GO:0005773(vacuole);GO:0005774(vacuolar membrane);GO:0008559(xenobiotic transmembrane transporting ATPase activity);GO:0016021(integral component of membrane);GO:0042626(ATPase activity, coupled to transmembrane movement of substances);GO:0055085(transmembrane transport);GO:1902417((+)-abscisic acid D-glucopyran…	02010(ABC transporters)	NA
circRNA92	0	0	0	0	0	78.221	0	0	0	0	0	7	-inf	down	1	1	no	chr6.2	8476355	8476991	-	2	circRNA	MS.gene031118.t1	MS.gene031118	chr6.2:8476060-8476354|chr6.2:8476991-8478425	chorismate mutase 1, chloroplastic [Medicago truncatula]	GO:0004106(chorismate mutase activity);GO:0005829(cytosol);GO:0009073(aromatic amino acid family biosynthetic process);GO:0009507(chloroplast);GO:0009536(plastid);GO:0016688(L-ascorbate peroxidase activity);GO:0046417(chorismate metabolic process);GO:0055114(oxidation-reduction process);GO:0098869(cellular oxidant detoxification)	00400(Phenylalanine, tyrosine and tryptophan biosynthesis)	EC:5.4.99.5
circRNA127	0	0	0	0	0	111.744	0	0	0	0	0	10	-inf	down	1	1	no	chr6.3	5243780	5243930	+	1	intergenic	intergenic_circRNA	intergenic_circRNA	chr6.3:5243779-5243930	NA	NA	NA	NA
circRNA115	0	0	0	0	0	156.442	0	0	0	0	0	14	-inf	down	1	1	no	chr2.3	22044284	22213896	+	1	intergenic	intergenic_circRNA	intergenic_circRNA	chr2.3:22044283-22213896	NA	NA	NA	NA
circRNA148	0	0	0	0	0	0	0	0	0	0	0	0	0	no	1	1	no	chr5.4	3130111	3130648	+	2	circRNA	MS.gene058120.t1	MS.gene058120	chr5.4:3129513-3130110|chr5.4:3130648-3131772	uncharacterized protein LOC11433722 isoform X1 [Medicago truncatula]	GO:0008728(GTP diphosphokinase activity);GO:0008893(guanosine-3',5'-bis(diphosphate) 3'-diphosphatase activity);GO:0009507(chloroplast);GO:0015969(guanosine tetraphosphate metabolic process);GO:0042594(response to starvation)	03013(RNA transport)	NA
ciRNA61	0	0	0	0	0	0	0	0	0	0	0	0	0	no	1	1	no	chr6.4	47828145	47828380	-	1	ciRNA	MS.gene066964.t1	MS.gene066964	chr6.4:47828112-47828380	protein TIFY 6B [Medicago truncatula]	GO:0003714(transcription corepressor activity);GO:0005634(nucleus);GO:0009611(response to wounding);GO:0031347(regulation of defense response);GO:1903507(negative regulation of nucleic acid-templated transcription);GO:2000022(regulation of jasmonic acid mediated signaling pathway)	04075(Plant hormone signal transduction)	NA
circRNA157	0	0	0	0	0	0	0	0	0	0	0	0	0	no	1	1	no	chr2.2	19454750	19466530	+	1	intergenic	intergenic_circRNA	intergenic_circRNA	chr2.2:19454749-19466530	NA	NA	NA	NA
ciRNA45	0	0	0	0	0	0	0	0	0	0	0	0	0	no	1	1	no	chr8.4	9580600	9580778	+	1	ciRNA	MS.gene26672.t1	MS.gene26672	chr8.4:9580599-9580810	serine/threonine-protein kinase RIPK [Medicago truncatula]	GO:0005515(protein binding)	NA	NA
circRNA288	0	48.2579	0	0	0	0	0	4	0	0	0	0	inf	up	1	1	no	chr3.2	58538885	58615448	+	1	intergenic	intergenic_circRNA	intergenic_circRNA	chr3.2:58538884-58615448	NA	NA	NA	NA
circRNA88	0	0	0	0	116.005	0	0	0	0	0	5	0	-inf	down	1	1	no	chr4.4	83856534	83856671	-	1	circRNA	MS.gene057833.t1		chr4.4:83855312-83856534|chr4.4:83856680-83857502	receptor-like protein 13 isoform X2 [Medicago truncatula]	GO:0007165(signal transduction);GO:0016021(integral component of membrane)	NA	NA
circRNA293	0	108.58	0	0	0	0	0	9	0	0	0	0	inf	up	1	1	no	chr7.3	31333287	31338951	-	1	intergenic	intergenic_circRNA	intergenic_circRNA	chr7.3:31333286-31338951	NA	NA	NA	NA
circRNA258	17.4241	0	0	0	0	0	1	0	0	0	0	0	inf	up	1	1	no	chr5.4	3131773	3133722	+	3	circRNA	MS.gene058120.t1	MS.gene058120	chr5.4:3130648-3131772|chr5.4:3133722-3134449	uncharacterized protein LOC11433722 isoform X1 [Medicago truncatula]	GO:0008728(GTP diphosphokinase activity);GO:0008893(guanosine-3',5'-bis(diphosphate) 3'-diphosphatase activity);GO:0009507(chloroplast);GO:0015969(guanosine tetraphosphate metabolic process);GO:0042594(response to starvation)	03013(RNA transport)	NA
circRNA313	0	0	15.4623	0	0	0	0	0	1	0	0	0	inf	up	1	1	no	chr5.3	2521225	2524192	+	3	circRNA	MS.gene024761.t1	MS.gene024761	chr5.3:2520914-2521224|chr5.3:2524192-2524366	uncharacterized protein LOC11433722 isoform X1 [Medicago truncatula]	GO:0008728(GTP diphosphokinase activity);GO:0008893(guanosine-3',5'-bis(diphosphate) 3'-diphosphatase activity);GO:0009507(chloroplast);GO:0015969(guanosine tetraphosphate metabolic process);GO:0042594(response to starvation)	03013(RNA transport)	NA
ciRNA49	0	0	0	0	0	0	0	0	0	0	0	0	0	no	1	1	no	chr3.3	73874771	73874915	+	1	ciRNA	MS.gene03190.t1	MS.gene03190	chr3.3:73874770-73874948	chloroplast processing peptidase [Medicago truncatula]	GO:0004252(serine-type endopeptidase activity);GO:0006465(signal peptide processing);GO:0006627(protein processing involved in protein targeting to mitochondrion);GO:0009535(chloroplast thylakoid membrane);GO:0010027(thylakoid membrane organization);GO:0033108(mitochondrial respiratory chain complex assembly);GO:0042720(mitochondrial inner membrane peptidase complex)	03060(Protein export)	EC:3.4.21.89
ciRNA31	0	0	0	0	0	11.1744	0	0	0	0	0	1	-inf	down	1	1	no	10996	7138	7250	+	1	ciRNA	MS.gene046604.t1	MS.gene046604	10996:7137-7445	NADH-ubiquinone oxidoreductase chain 6, partial [Mucuna pruriens]	GO:0005739(mitochondrion)	00190(Oxidative phosphorylation)	EC:1.6.5.3
circRNA275	0	36.1935	0	0	0	0	0	3	0	0	0	0	inf	up	1	1	no	chr8.1	33962816	33965283	-	5	circRNA	MS.gene49499.t1	MS.gene49499	chr8.1:33962273-33962815|chr8.1:33965283-33965873	plastidal glycolate/glycerate translocator 1, chloroplastic isoform X2 [Medicago truncatula]	GO:0009658(chloroplast organization);GO:0009706(chloroplast inner membrane)	NA	NA
circRNA144	0	0	0	0	0	0	0	0	0	0	0	0	0	no	1	1	no	chr1.1	23152275	23153309	-	2	circRNA	MS.gene29242.t1	MS.gene29242	chr1.1:23151981-23152274|chr1.1:23153309-23153709	AUGMIN subunit 3 [Medicago truncatula]	GO:0003674(molecular_function);GO:0005634(nucleus);GO:0005813(centrosome);GO:0005819(spindle);GO:0005874(microtubule);GO:0007098(centrosome cycle);GO:0009524(phragmoplast);GO:0051225(spindle assembly);GO:0051301(cell division);GO:0070652(HAUS complex);GO:0080175(phragmoplast microtubule organization)	NA	NA
circRNA210	191.666	0	0	0	0	0	11	0	0	0	0	0	inf	up	1	1	no	chr8.1	79494403	79565725	+	1	intergenic	intergenic_circRNA	intergenic_circRNA	chr8.1:79494402-79565725	NA	NA	NA	NA
ciRNA2	0	0	0	11.5672	0	0	0	0	0	1	0	0	-inf	down	1	1	no	chr2.1	74328425	74329349	+	1	ciRNA	MS.gene01140.t1	MS.gene01140	chr2.1:74328424-74329365	RecName: Full=Beta-xylosidase/alpha-L-arabinofuranosidase 1; AltName: Full=Xylan 1,4-beta-xylosidase/Alpha-L-arabinofuranosidase 1; Short=MsXyl1; Includes: RecName: Full=Beta-xylosidase; AltName: Full=1,4-beta-D-xylan xylohydrolase; AltName: Full=Xylan 1,4-beta-xylosidase; Includes: RecName: Full=Alpha-L-arabinofuranosidase; Short=Arabinosidase; Flags: Precursor	GO:0009044(xylan 1,4-beta-xylosidase activity);GO:0009505(plant-type cell wall);GO:0031222(arabinan catabolic process);GO:0045493(xylan catabolic process);GO:0046556(alpha-L-arabinofuranosidase activity)	00520(Amino sugar and nucleotide sugar metabolism)	EC:3.2.1.37
ciRNA93	0	0	0	0	0	0	0	0	0	0	0	0	0	no	1	1	no	chr1.1	37520977	37521584	+	1	ciRNA	MS.gene073753.t1	MS.gene073753	chr1.1:37520976-37521603	structural maintenance of chromosomes protein 3 [Medicago truncatula]	GO:0000775(chromosome, centromeric region);GO:0000785(chromatin);GO:0003682(chromatin binding);GO:0005524(ATP binding);GO:0005634(nucleus);GO:0005737(cytoplasm);GO:0005819(spindle);GO:0006281(DNA repair);GO:0007059(chromosome segregation);GO:0007062(sister chromatid cohesion);GO:0008278(cohesin complex);GO:0009506(plasmodesma);GO:0016363(nuclear matrix);GO:0051301(cell division);GO:0051321(meioti…	NA	NA
circRNA319	0	0	77.3117	0	0	0	0	0	5	0	0	0	inf	up	1	1	no	chr5.2	70792014	70793975	-	1	intergenic	intergenic_circRNA	intergenic_circRNA	chr5.2:70792013-70793975	NA	NA	NA	NA
ciRNA84	0	0	0	0	0	0	0	0	0	0	0	0	0	no	1	1	no	chr2.4	18074576	18075122	+	1	ciRNA	MS.gene065187.t1	MS.gene065187	chr2.4:18074575-18075157	beta-glucosidase 18 isoform X1 [Medicago truncatula]	GO:0008422(beta-glucosidase activity);GO:1901657(glycosyl compound metabolic process)	00500(Starch and sucrose metabolism);00460(Cyanoamino acid metabolism);00940(Phenylpropanoid biosynthesis)	EC:3.2.1.21
circRNA277	0	12.0645	0	0	0	0	0	1	0	0	0	0	inf	up	1	1	no	chr4.1	12739608	12739776	-	1	circRNA	MS.gene27872.t1	MS.gene27872	chr4.1:12738752-12739607|chr4.1:12739776-12743013	elongation factor 1-alpha isoform X1 [Medicago truncatula]	GO:0003924(GTPase activity);GO:0005622(intracellular);GO:0006412(translation);GO:0032790(ribosome disassembly)	03015(mRNA surveillance pathway)	NA
ciRNA54	0	0	0	0	0	0	0	0	0	0	0	0	0	no	1	1	no	chr5.2	77789925	77790192	-	1	ciRNA	MS.gene030078.t1	MS.gene030078	chr5.2:77789903-77790192	uncharacterized protein LOC11437066 [Medicago truncatula]	GO:0005777(peroxisome);GO:0009408(response to heat)	04141(Protein processing in endoplasmic reticulum)	NA
circRNA159	0	0	0	0	0	0	0	0	0	0	0	0	0	no	1	1	no	chr2.2	66117197	66118304	-	1	intergenic	intergenic_circRNA	intergenic_circRNA	chr2.2:66117196-66118304	NA	NA	NA	NA
ciRNA57	0	0	0	0	0	0	0	0	0	0	0	0	0	no	1	1	no	chr5.1	73531319	73531586	-	1	ciRNA	MS.gene062332.t1	MS.gene062332	chr5.1:73531297-73531586	uncharacterized protein LOC11437066 [Medicago truncatula]	GO:0005777(peroxisome);GO:0009408(response to heat)	NA	NA
circRNA131	0	0	0	0	0	134.093	0	0	0	0	0	12	-inf	down	1	1	no	chr7.4	10332417	10332589	-	1	intergenic	intergenic_circRNA	intergenic_circRNA	chr7.4:10332416-10332589	NA	NA	NA	NA
ciRNA88	0	0	0	0	0	0	0	0	0	0	0	0	0	no	1	1	no	chr3.2	80573299	80573466	-	1	ciRNA	MS.gene40912.t1	MS.gene40912	chr3.2:80573189-80573466	DNA polymerase delta catalytic subunit [Medicago truncatula]	GO:0006287(base-excision repair, gap-filling);GO:0006297(nucleotide-excision repair, DNA gap filling);GO:0008296(3'-5'-exodeoxyribonuclease activity);GO:0043625(delta DNA polymerase complex);GO:0045004(DNA replication proofreading)	00230(Purine metabolism);00240(Pyrimidine metabolism);03030(DNA replication);03410(Base excision repair);03420(Nucleotide excision repair);03430(Mismatch repair);03440(Homologous recombination)	EC:2.7.7.7
circRNA305	0	0	15.4623	0	0	0	0	0	1	0	0	0	inf	up	1	1	no	chr8.1	69477862	69478167	-	2	circRNA	MS.gene019483.t1	MS.gene019483	chr8.1:69477537-69477861|chr8.1:69478167-69478615	Ara4-interacting protein [Medicago truncatula]	GO:0004518(nuclease activity);GO:0004520(endodeoxyribonuclease activity);GO:0004521(endoribonuclease activity);GO:0005634(nucleus);GO:0005737(cytoplasm);GO:0005886(plasma membrane);GO:0006308(DNA catabolic process);GO:0006401(RNA catabolic process)	NA	NA
circRNA291	0	132.709	0	0	0	0	0	11	0	0	0	0	inf	up	1	1	no	chr5.2	60266986	60278322	+	1	intergenic	intergenic_circRNA	intergenic_circRNA	chr5.2:60266985-60278322	NA	NA	NA	NA
circRNA322	0	0	108.236	0	0	0	0	0	7	0	0	0	inf	up	1	1	no	chr8.4	77965420	78041173	+	1	intergenic	intergenic_circRNA	intergenic_circRNA	chr8.4:77965419-78041173	NA	NA	NA	NA
circRNA65	0	0	0	0	23.2011	0	0	0	0	0	1	0	-inf	down	1	1	no	21044	50733	51035	-	1	circRNA	MS.gene013106.t1	MS.gene013106	21044:50651-50732|21044:51035-51116	E3 ubiquitin-protein ligase UPL1 [Medicago truncatula]	GO:0004842(ubiquitin-protein transferase activity);GO:0005634(nucleus);GO:0005737(cytoplasm)	04120(Ubiquitin mediated proteolysis)	EC:2.3.2.26
ciRNA39	0	0	0	0	0	0	0	0	0	0	0	0	0	no	1	1	no	chr2.3	66965052	66965534	-	1	ciRNA	MS.gene00993.t1	MS.gene00993	chr2.3:66965029-66965534	lipase isoform X1 [Medicago truncatula]	GO:0004806(triglyceride lipase activity);GO:0005576(extracellular region);GO:0006629(lipid metabolic process);GO:0016787(hydrolase activity)	NA	NA
circRNA116	0	0	0	0	0	44.6977	0	0	0	0	0	4	-inf	down	1	1	no	chr2.3	52672389	52688505	+	1	intergenic	intergenic_circRNA	intergenic_circRNA	chr2.3:52672388-52688505	NA	NA	NA	NA
circRNA181	0	0	0	0	0	0	0	0	0	0	0	0	0	no	1	1	no	chr4.2	70327924	70333768	+	8	circRNA	MS.gene070215.t1	MS.gene070215	chr4.2:70327752-70327923|chr4.2:70333768-70336203	GDSL-like lipase/acylhydrolase [Medicago truncatula]	GO:0005576(extracellular region);GO:0016042(lipid catabolic process);GO:0016298(lipase activity);GO:0052689(carboxylic ester hydrolase activity)	00561(Glycerolipid metabolism)	EC:2.3.1.158
circRNA32	0	0	0	231.344	0	0	0	0	0	20	0	0	-inf	down	1	1	no	chr3.2	61451413	61597296	-	1	intergenic	intergenic_circRNA	intergenic_circRNA	chr3.2:61451412-61597296	NA	NA	NA	NA
ciRNA23	0	0	0	0	23.2011	0	0	0	0	0	1	0	-inf	down	1	1	no	chr1.2	83270910	83271094	-	1	ciRNA	MS.gene065032.t1	MS.gene065032	chr1.2:83270878-83271094	glycerate dehydrogenase [Medicago truncatula]	GO:0005829(cytosol);GO:0016618(hydroxypyruvate reductase activity);GO:0030267(glyoxylate reductase (NADP) activity)	00630(Glyoxylate and dicarboxylate metabolism);00260(Glycine, serine and threonine metabolism)	NA
circRNA259	104.545	0	0	0	0	0	6	0	0	0	0	0	inf	up	1	1	no	chr3.1	38600322	38601766	+	4	circRNA	MS.gene82739.t1		chr3.1:38599027-38600322|chr3.1:38601766-38602647	hypothetical protein MtrunA17_Chr3g0097171 [Medicago truncatula]	GO:0005515(protein binding);GO:0005634(nucleus);GO:0005737(cytoplasm);GO:0005834(heterotrimeric G-protein complex);GO:0007049(cell cycle);GO:0007165(signal transduction);GO:0010997(anaphase-promoting complex binding);GO:0016567(protein ubiquitination);GO:0019900(kinase binding);GO:0033597(mitotic checkpoint complex);GO:0051301(cell division);GO:0097027(ubiquitin-protein transferase activator acti…	04120(Ubiquitin mediated proteolysis)	NA
ciRNA77	0	0	0	0	0	0	0	0	0	0	0	0	0	no	1	1	no	chr7.4	21821048	21821340	-	1	ciRNA	MS.gene51875.t1	MS.gene51875	chr7.4:21821011-21821340	putative protein-serine/threonine kinase CK1-CK1-Pl family [Medicago truncatula]	GO:0004674(protein serine/threonine kinase activity);GO:0005634(nucleus);GO:0005737(cytoplasm);GO:0006897(endocytosis);GO:0008360(regulation of cell shape);GO:0016055(Wnt signaling pathway);GO:0018105(peptidyl-serine phosphorylation)	NA	NA
ciRNA101	17.4241	0	0	0	0	0	1	0	0	0	0	0	inf	up	1	1	no	chr7.2	7155211	7155452	-	1	ciRNA	MS.gene23052.t1	MS.gene23052	chr7.2:7155185-7155452	probable glutamate carboxypeptidase AMP1 isoform X1 [Medicago truncatula]	GO:0004180(carboxypeptidase activity);GO:0005515(protein binding);GO:0005789(endoplasmic reticulum membrane);GO:0005886(plasma membrane);GO:0006508(proteolysis);GO:0009640(photomorphogenesis);GO:0009793(embryo development ending in seed dormancy);GO:0009908(flower development);GO:0009910(negative regulation of flower development);GO:0010305(leaf vascular tissue pattern formation);GO:0016805(dipep…	NA	NA
circRNA138	0	0	0	0	0	0	0	0	0	0	0	0	0	no	1	1	no	chr4.2	31853108	31853445	+	2	circRNA	MS.gene83178.t1	MS.gene83178	chr4.2:31851944-31853107|chr4.2:31853445-31854117	unknown [Medicago truncatula]	GO:0003676(nucleic acid binding);GO:0005515(protein binding);GO:0005634(nucleus);GO:0005635(nuclear envelope);GO:0005643(nuclear pore);GO:0015031(protein transport);GO:0046872(metal ion binding);GO:0051028(mRNA transport)	03013(RNA transport)	NA
circRNA264	52.2724	0	0	0	0	0	3	0	0	0	0	0	inf	up	1	1	no	chr3.4	13861304	13933973	+	1	intergenic	intergenic_circRNA	intergenic_circRNA	chr3.4:13861303-13933973	NA	NA	NA	NA
circRNA34	0	0	0	80.9704	0	0	0	0	0	7	0	0	-inf	down	1	1	no	chr4.1	81987779	82124247	-	1	intergenic	intergenic_circRNA	intergenic_circRNA	chr4.1:81987778-82124247	NA	NA	NA	NA
circRNA208	0	0	0	0	0	0	0	0	0	0	0	0	0	no	1	1	no	chr7.4	37821884	37882764	-	1	intergenic	intergenic_circRNA	intergenic_circRNA	chr7.4:37821883-37882764	NA	NA	NA	NA
ciRNA37	0	0	0	0	0	11.1744	0	0	0	0	0	1	-inf	down	1	1	no	chr7.2	456466	456625	-	1	ciRNA	MS.gene024396.t1	MS.gene024396	chr7.2:456375-456625	heterogeneous nuclear ribonucleoprotein Q [Medicago truncatula]	GO:0000245(spliceosomal complex assembly);GO:0015030(Cajal body)	NA	NA
circRNA99	0	0	0	0	0	11.1744	0	0	0	0	0	1	-inf	down	1	1	no	chr4.4	35164686	35165035	-	2	circRNA	MS.gene057682.t1	MS.gene057682	chr4.4:35164503-35164685|chr4.4:35165035-35165433	E3 ubiquitin-protein ligase UPL3 [Medicago truncatula]	GO:0004842(ubiquitin-protein transferase activity);GO:0005634(nucleus);GO:0005737(cytoplasm)	04120(Ubiquitin mediated proteolysis)	EC:2.3.2.26
ciRNA128	0	0	15.4623	0	0	0	0	0	1	0	0	0	inf	up	1	1	no	chr1.3	76329239	76329428	-	1	ciRNA	MS.gene74946.t1	MS.gene74946	chr1.3:76329206-76329428	glycerate dehydrogenase [Medicago truncatula]	GO:0005829(cytosol);GO:0016618(hydroxypyruvate reductase activity);GO:0030267(glyoxylate reductase (NADP) activity)	00630(Glyoxylate and dicarboxylate metabolism);00260(Glycine, serine and threonine metabolism)	NA
ciRNA119	0	12.0645	0	0	0	0	0	1	0	0	0	0	inf	up	1	1	no	chr7.3	69484457	69484611	-	1	ciRNA	MS.gene62543.t1	MS.gene62543	chr7.3:69483955-69484611	putative adenylate kinase [Medicago truncatula]	GO:0004017(adenylate kinase activity);GO:0005524(ATP binding);GO:0005739(mitochondrion);GO:0046939(nucleotide phosphorylation)	00230(Purine metabolism);00730(Thiamine metabolism)	EC:2.7.4.3
circRNA70	0	0	0	0	92.8043	0	0	0	0	0	4	0	-inf	down	1	1	no	chr3.4	96522606	96643113	-	1	intergenic	intergenic_circRNA	intergenic_circRNA	chr3.4:96522605-96643113	NA	NA	NA	NA
ciRNA7	0	0	0	11.5672	0	0	0	0	0	1	0	0	-inf	down	1	1	no	chr3.3	56940483	56941636	-	1	ciRNA	MS.gene008421.t1	MS.gene008421	chr3.3:56940450-56941636	uncharacterized protein LOC11426558 [Medicago truncatula]	GO:0005634(nucleus)	NA	NA
ciRNA100	17.4241	0	0	0	0	0	1	0	0	0	0	0	inf	up	1	1	no	chr4.3	24383492	24383772	-	1	ciRNA	MS.gene31965.t1	MS.gene31965	chr4.3:24383458-24383772	DUF616 family protein [Medicago truncatula]	GO:0016021(integral component of membrane);GO:0016757(transferase activity, transferring glycosyl groups)	NA	NA
circRNA155	0	0	0	0	0	0	0	0	0	0	0	0	0	no	1	1	no	chr2.1	24529912	24619709	+	1	intergenic	intergenic_circRNA	intergenic_circRNA	chr2.1:24529911-24619709	NA	NA	NA	NA
circRNA219	0	0	0	0	0	0	0	0	0	0	0	0	0	no	1	1	no	chr8.1	62981841	62983011	-	3	circRNA	MS.gene063833.t1	MS.gene063833	chr8.1:62981445-62981840|chr8.1:62983011-62983283	WAT1-related protein At5g07050 [Medicago truncatula]	GO:0005886(plasma membrane);GO:0006810(transport);GO:0022857(transmembrane transporter activity)	NA	NA
ciRNA120	0	12.0645	0	0	0	0	0	1	0	0	0	0	inf	up	1	1	no	chr5.2	45498104	45498247	-	1	ciRNA	MS.gene042681.t1	MS.gene042681	chr5.2:45498071-45498247	uncharacterized protein At1g26090, chloroplastic [Medicago truncatula]	GO:0005524(ATP binding);GO:0009507(chloroplast);GO:0010287(plastoglobule)	NA	NA
circRNA158	0	120.645	0	0	0	0	0	10	0	0	0	0	inf	up	1	1	no	chr2.2	19454750	19495683	+	1	intergenic	intergenic_circRNA	intergenic_circRNA	chr2.2:19454749-19495683	NA	NA	NA	NA
ciRNA68	0	0	0	0	0	0	0	0	0	0	0	0	0	no	1	1	no	chr4.3	36757988	36758453	+	1	ciRNA	MS.gene056607.t1	MS.gene056607	chr4.3:36757987-36758482	peptidyl-prolyl cis-trans isomerase FKBP16-3, chloroplastic [Medicago truncatula]	GO:0003755(peptidyl-prolyl cis-trans isomerase activity);GO:0005528(FK506 binding);GO:0005789(endoplasmic reticulum membrane);GO:0061077(chaperone-mediated protein folding)	NA	NA
circRNA29	0	0	0	46.2688	0	0	0	0	0	4	0	0	-inf	down	1	1	no	chr3.1	55544255	55585982	-	1	intergenic	intergenic_circRNA	intergenic_circRNA	chr3.1:55544254-55585982	NA	NA	NA	NA
ciRNA114	0	36.1935	0	0	0	0	0	3	0	0	0	0	inf	up	1	1	no	chr7.1	8465821	8466521	+	1	ciRNA	MS.gene22444.t1	MS.gene22444	chr7.1:8465820-8466541	zinc finger protein JACKDAW [Medicago truncatula]	GO:0003676(nucleic acid binding);GO:0003677(DNA binding);GO:0003700(DNA binding transcription factor activity);GO:0005515(protein binding);GO:0005634(nucleus);GO:0006351(transcription, DNA-templated);GO:0006355(regulation of transcription, DNA-templated);GO:0008270(zinc ion binding);GO:0008356(asymmetric cell division);GO:0010075(regulation of meristem growth);GO:0042803(protein homodimerization …	00052(Galactose metabolism);00600(Sphingolipid metabolism);00531(Glycosaminoglycan degradation);00604(Glycosphingolipid biosynthesis - ganglio series);00511(Other glycan degradation)	EC:3.2.1.23
circRNA172	0	0	0	0	0	0	0	0	0	0	0	0	0	no	1	1	no	chr7.2	44706707	44891574	-	1	intergenic	intergenic_circRNA	intergenic_circRNA	chr7.2:44706706-44891574	NA	NA	NA	NA
circRNA128	0	0	0	0	0	67.0466	0	0	0	0	0	6	-inf	down	1	1	no	chr6.4	50465155	50487886	+	1	intergenic	intergenic_circRNA	intergenic_circRNA	chr6.4:50465154-50487886	NA	NA	NA	NA
circRNA105	0	0	0	0	0	11.1744	0	0	0	0	0	1	-inf	down	1	1	no	chr3.4	68896692	68897924	-	6	circRNA	MS.gene008179.t1	MS.gene008179	chr3.4:68896582-68896691|chr3.4:68897924-68898635	protein FIZZY-RELATED 3 [Medicago truncatula]	GO:0005515(protein binding);GO:0005634(nucleus);GO:0005834(heterotrimeric G-protein complex);GO:0007049(cell cycle);GO:0007165(signal transduction);GO:0010997(anaphase-promoting complex binding);GO:0016567(protein ubiquitination);GO:0051301(cell division);GO:0097027(ubiquitin-protein transferase activator activity);GO:1904668(positive regulation of ubiquitin protein ligase activity)	04120(Ubiquitin mediated proteolysis)	NA
circRNA214	0	0	0	0	0	0	0	0	0	0	0	0	0	no	1	1	no	chr2.1	68274445	68275732	-	4	circRNA	MS.gene002689.t1	MS.gene002689	chr2.1:68274248-68274444|chr2.1:68275732-68275969	serine carboxypeptidase-like 12 [Medicago truncatula]	GO:0004185(serine-type carboxypeptidase activity);GO:0016747(transferase activity, transferring acyl groups other than amino-acyl groups);GO:0019748(secondary metabolic process);GO:0051603(proteolysis involved in cellular protein catabolic process)	NA	NA
circRNA94	0	0	0	0	0	22.3489	0	0	0	0	0	2	-inf	down	1	1	no	chr8.3	66914136	66915472	-	2	circRNA	MS.gene068366.t1	MS.gene068366	chr8.3:66913787-66914135|chr8.3:66915472-66915824	putative transcription factor WD40-like family [Medicago truncatula]	GO:0007035(vacuolar acidification);GO:0008593(regulation of Notch signaling pathway);GO:0035149(lumen formation, open tracheal system);GO:0043291(RAVE complex);GO:0070072(vacuolar proton-transporting V-type ATPase complex assembly)	NA	NA
circRNA247	0	0	0	0	0	0	0	0	0	0	0	0	0	no	1	1	no	chr8.3	30570955	30682425	-	1	intergenic	intergenic_circRNA	intergenic_circRNA	chr8.3:30570954-30682425	NA	NA	NA	NA
circRNA240	0	0	0	0	0	0	0	0	0	0	0	0	0	no	1	1	no	chr4.4	69905147	69921998	+	1	intergenic	intergenic_circRNA	intergenic_circRNA	chr4.4:69905146-69921998	NA	NA	NA	NA
circRNA5	0	0	0	34.7016	0	0	0	0	0	3	0	0	-inf	down	1	1	no	chr6.4	40054324	40059210	-	7	circRNA	MS.gene063650.t1	MS.gene063650	chr6.4:40051873-40054323|chr6.4:40059210-40064492	hypothetical protein TSUD_76980 [Trifolium subterraneum]	GO:0002213(defense response to insect);GO:0004357(glutamate-cysteine ligase activity);GO:0005524(ATP binding);GO:0006750(glutathione biosynthetic process);GO:0009408(response to heat);GO:0009507(chloroplast);GO:0009536(plastid);GO:0009570(chloroplast stroma);GO:0009700(indole phytoalexin biosynthetic process);GO:0009753(response to jasmonic acid);GO:0009816(defense response to bacterium, incompat…	00270(Cysteine and methionine metabolism);00480(Glutathione metabolism)	EC:6.3.2.2
ciRNA125	0	0	15.4623	0	0	0	0	0	1	0	0	0	inf	up	1	1	no	chr3.4	95640567	95640851	+	1	ciRNA	MS.gene72018.t1	MS.gene72018	chr3.4:95640566-95640882	amino acid permease 8 isoform X1 [Medicago truncatula]	GO:0003333(amino acid transmembrane transport);GO:0005886(plasma membrane);GO:0015171(amino acid transmembrane transporter activity)	NA	NA
ciRNA90	0	0	0	0	0	0	0	0	0	0	0	0	0	no	1	1	no	chr1.4	77364709	77365362	+	1	ciRNA	MS.gene006207.t1	MS.gene006207	chr1.4:77364708-77366048	putative CAAX amino terminal protease [Medicago truncatula]	NA	NA	NA
circRNA79	0	0	0	0	46.4022	0	0	0	0	0	2	0	-inf	down	1	1	no	chr6.3	62321284	62344842	-	1	intergenic	intergenic_circRNA	intergenic_circRNA	chr6.3:62321283-62344842	NA	NA	NA	NA
circRNA90	0	0	0	0	0	11.1744	0	0	0	0	0	1	-inf	down	1	1	no	chr6.4	41222796	41222944	+	1	circRNA	MS.gene30479.t1	MS.gene30479	chr6.4:41222449-41222795|chr6.4:41222944-41225213	uncharacterized protein LOC25497161 [Medicago truncatula]	GO:0004222(metalloendopeptidase activity);GO:0005739(mitochondrion);GO:0006508(proteolysis);GO:0016020(membrane);GO:0016021(integral component of membrane)	NA	NA
circRNA256	17.4241	0	0	0	0	0	1	0	0	0	0	0	inf	up	1	1	no	chr5.3	2522483	2524433	+	3	circRNA	MS.gene024761.t1	MS.gene024761	chr5.3:2521357-2522482|chr5.3:2524433-2525160	uncharacterized protein LOC11433722 isoform X1 [Medicago truncatula]	GO:0008728(GTP diphosphokinase activity);GO:0008893(guanosine-3',5'-bis(diphosphate) 3'-diphosphatase activity);GO:0009507(chloroplast);GO:0015969(guanosine tetraphosphate metabolic process);GO:0042594(response to starvation)	03013(RNA transport)	NA
ciRNA82	0	0	0	0	0	0	0	0	0	0	0	0	0	no	1	1	no	chr2.3	21959844	21960006	+	1	ciRNA	MS.gene72477.t1	MS.gene72477	chr2.3:21959843-21960030	LRR receptor-like kinase [Medicago truncatula]	GO:0004674(protein serine/threonine kinase activity);GO:0005886(plasma membrane)	NA	NA
circRNA143	0	0	0	0	0	0	0	0	0	0	0	0	0	no	1	1	no	chr1.3	52527364	52527555	+	1	circRNA	MS.gene95472.t1	MS.gene95472	chr1.3:52527154-52527363|chr1.3:52527555-52527717	RRP12-like protein isoform X1 [Medicago truncatula]	GO:0005634(nucleus);GO:0008150(biological_process)	NA	NA
circRNA15	0	0	0	34.7016	0	0	0	0	0	3	0	0	-inf	down	1	1	no	chr1.2	6653152	6654321	-	5	circRNA	MS.gene016172.t1	MS.gene016172	chr1.2:6653063-6653151|chr1.2:6654321-6656082	LOW QUALITY PROTEIN: myosin-15 [Medicago truncatula]	GO:0003774(motor activity);GO:0003779(actin binding);GO:0005515(protein binding);GO:0005516(calmodulin binding);GO:0005524(ATP binding);GO:0005634(nucleus);GO:0005737(cytoplasm);GO:0007097(nuclear migration);GO:0016459(myosin complex);GO:0030048(actin filament-based movement);GO:0031965(nuclear membrane);GO:2000769(regulation of establishment or maintenance of cell polarity regulating cell shape)	NA	NA
circRNA161	0	108.58	0	0	0	0	0	9	0	0	0	0	inf	up	1	1	no	chr3.1	14024429	14044050	-	1	intergenic	intergenic_circRNA	intergenic_circRNA	chr3.1:14024428-14044050	NA	NA	NA	NA
circRNA229	0	0	0	0	0	0	0	0	0	0	0	0	0	no	1	1	no	chr2.3	52672389	52683160	+	1	intergenic	intergenic_circRNA	intergenic_circRNA	chr2.3:52672388-52683160	NA	NA	NA	NA
ciRNA26	0	0	0	0	0	22.3489	0	0	0	0	0	2	-inf	down	1	1	no	chr6.1	71629109	71629327	+	1	ciRNA	MS.gene58913.t1	MS.gene58913	chr6.1:71629108-71629358	beta-glucosidase 44 [Medicago truncatula]	GO:0008422(beta-glucosidase activity);GO:1901657(glycosyl compound metabolic process)	00500(Starch and sucrose metabolism);00460(Cyanoamino acid metabolism);00940(Phenylpropanoid biosynthesis)	EC:3.2.1.21
circRNA75	0	0	0	0	139.206	0	0	0	0	0	6	0	-inf	down	1	1	no	chr4.4	10599864	10610291	-	1	intergenic	intergenic_circRNA	intergenic_circRNA	chr4.4:10599863-10610291	NA	NA	NA	NA
circRNA56	0	0	0	0	23.2011	0	0	0	0	0	1	0	-inf	down	1	1	no	chr2.2	50251176	50256835	-	8	circRNA	MS.gene037015.t1	MS.gene037015	chr2.2:50246455-50251175|chr2.2:50256835-50258434	U3 small nucleolar RNA-associated-like protein [Medicago truncatula]	GO:0000462(maturation of SSU-rRNA from tricistronic rRNA transcript (SSU-rRNA, 5.8S rRNA, LSU-rRNA));GO:0005730(nucleolus);GO:0019843(rRNA binding);GO:0032040(small-subunit processome);GO:0034511(U3 snoRNA binding)	NA	NA
ciRNA41	0	0	0	0	0	0	0	0	0	0	0	0	0	no	1	1	no	chr2.4	18745371	18745525	+	1	ciRNA	MS.gene059807.t1	MS.gene059807	chr2.4:18745370-18745837	protein SPA1-RELATED 3 isoform X1 [Medicago truncatula]	GO:0004672(protein kinase activity);GO:0005515(protein binding);GO:0005524(ATP binding);GO:0005634(nucleus);GO:0005834(heterotrimeric G-protein complex);GO:0006468(protein phosphorylation);GO:0009585(red, far-red light phototransduction);GO:0009637(response to blue light);GO:0042802(identical protein binding);GO:0080008(Cul4-RING E3 ubiquitin ligase complex)	04120(Ubiquitin mediated proteolysis);04712(Circadian rhythm - plant)	EC:2.3.2.27
ciRNA121	0	0	15.4623	0	0	0	0	0	1	0	0	0	inf	up	1	1	no	chr4.2	22924042	22924435	-	1	ciRNA	MS.gene39520.t1	MS.gene39520	chr4.2:22924016-22924435	triose phosphate/phosphate translocator, chloroplastic [Medicago truncatula]	GO:0034219(carbohydrate transmembrane transport)	NA	NA
circRNA189	0	0	0	0	0	0	0	0	0	0	0	0	0	no	1	1	no	chr2.1	16587469	16587635	-	1	circRNA	MS.gene91486.t1		chr2.1:16587645-16587893	uncharacterized protein At4g22758 [Medicago truncatula]	GO:0003674(molecular_function);GO:0005634(nucleus)	NA	NA
ciRNA111	0	24.129	0	0	0	0	0	2	0	0	0	0	inf	up	1	1	no	chr8.4	8489943	8490102	-	1	ciRNA	MS.gene012289.t1	MS.gene012289	chr8.4:8489792-8490102	GATA type zinc finger transcription factor family protein [Medicago truncatula]	GO:0000977(RNA polymerase II regulatory region sequence-specific DNA binding);GO:0001085(RNA polymerase II transcription factor binding);GO:0001228(transcriptional activator activity, RNA polymerase II transcription regulatory region sequence-specific DNA binding);GO:0003682(chromatin binding);GO:0005634(nucleus);GO:0005667(transcription factor complex);GO:0030154(cell differentiation)	NA	NA
circRNA245	174.241	0	0	0	0	0	10	0	0	0	0	0	inf	up	1	1	no	chr7.1	56503663	56503864	-	1	intergenic	intergenic_circRNA	intergenic_circRNA	chr7.1:56503662-56503864	NA	NA	NA	NA
ciRNA5	0	0	0	11.5672	0	0	0	0	0	1	0	0	-inf	down	1	1	no	chr3.2	66136329	66136474	+	1	ciRNA	MS.gene29041.t1	MS.gene29041	chr3.2:66136328-66136636	uncharacterized protein LOC11412638 isoform X1 [Medicago truncatula]	GO:0000123(histone acetyltransferase complex);GO:0003674(molecular_function);GO:0043966(histone H3 acetylation);GO:0043981(histone H4-K5 acetylation);GO:0043982(histone H4-K8 acetylation);GO:0043983(histone H4-K12 acetylation);GO:0046872(metal ion binding)	NA	NA
ciRNA124	0	0	15.4623	0	0	0	0	0	1	0	0	0	inf	up	1	1	no	chr4.3	17855108	17855284	-	1	ciRNA	MS.gene023242.t1	MS.gene023242	chr4.3:17854141-17855284	putative proton-dependent oligopeptide transporter family, major facilitator superfamily [Medicago truncatula]	GO:0000325(plant-type vacuole);GO:0005215(transporter activity);GO:0005773(vacuole);GO:0005774(vacuolar membrane);GO:0005794(Golgi apparatus);GO:0005886(plasma membrane);GO:0009705(plant-type vacuole membrane);GO:0015031(protein transport);GO:0015112(nitrate transmembrane transporter activity);GO:0015334(high-affinity oligopeptide transmembrane transporter activity);GO:0015833(peptide transport);…	NA	NA
circRNA137	0	0	0	0	0	0	0	0	0	0	0	0	0	no	1	1	no	chr8.4	72300900	72302506	+	3	circRNA	MS.gene25091.t1	MS.gene25091	chr8.4:72300281-72300899|chr8.4:72302506-72302898	protein FLUORESCENT IN BLUE LIGHT, chloroplastic [Medicago truncatula]	NA	NA	NA
circRNA62	0	0	0	0	23.2011	0	0	0	0	0	1	0	-inf	down	1	1	no	chr4.3	31703116	31704667	-	5	circRNA	MS.gene031800.t1	MS.gene031800	chr4.3:31702558-31703115|chr4.3:31704667-31704979	uncharacterized protein LOC11441638 [Medicago truncatula]	NA	NA	NA
circRNA316	0	0	123.699	0	0	0	0	0	8	0	0	0	inf	up	1	1	no	chr3.1	12880754	12993459	-	1	intergenic	intergenic_circRNA	intergenic_circRNA	chr3.1:12880753-12993459	NA	NA	NA	NA
circRNA147	0	0	0	0	0	0	0	0	0	0	0	0	0	no	1	1	no	chr5.1	12435836	12436000	-	1	circRNA	MS.gene010574.t1	MS.gene010574	chr5.1:12435668-12435835|chr5.1:12436000-12436084	beta-galactosidase 3 [Medicago truncatula]	GO:0004565(beta-galactosidase activity);GO:0005618(cell wall);GO:0005773(vacuole)	00052(Galactose metabolism);00600(Sphingolipid metabolism);00531(Glycosaminoglycan degradation);00604(Glycosphingolipid biosynthesis - ganglio series);00511(Other glycan degradation)	EC:3.2.1.23
ciRNA30	0	0	0	0	0	22.3489	0	0	0	0	0	2	-inf	down	1	1	no	chr8.1	77850427	77850597	+	1	ciRNA	MS.gene074585.t1	MS.gene074585	chr8.1:77850426-77851412	dnaJ homolog subfamily B member 6 isoform X1 [Medicago truncatula]	GO:0006457(protein folding)	NA	NA
circRNA224	0	0	0	0	0	0	0	0	0	0	0	0	0	no	1	1	no	chr7.4	4715366	4716124	+	2	circRNA	MS.gene050788.t1	MS.gene050788	chr7.4:4715110-4715365|chr7.4:4716124-4716911	diphthine--ammonia ligase isoform X1 [Medicago truncatula]	GO:0004521(endoribonuclease activity);GO:0017178(diphthine-ammonia ligase activity)	NA	NA
circRNA165	0	24.129	0	0	0	0	0	2	0	0	0	0	inf	up	1	1	no	chr4.2	71418176	71423828	-	1	intergenic	intergenic_circRNA	intergenic_circRNA	chr4.2:71418175-71423828	NA	NA	NA	NA
ciRNA55	0	0	0	0	0	0	0	0	0	0	0	0	0	no	1	1	no	chr5.1	42294811	42295157	-	1	ciRNA	MS.gene80135.t1	MS.gene80135	chr5.1:42294782-42295157	serine/threonine-protein kinase STN7, chloroplastic [Medicago truncatula]	GO:0004672(protein kinase activity)	NA	NA
circRNA312	0	0	15.4623	0	0	0	0	0	1	0	0	0	inf	up	1	1	no	chr1.4	59453866	59456686	-	2	circRNA	MS.gene40007.t1	MS.gene40007	chr1.4:59448585-59453865|chr1.4:59456686-59460629	protein HUA2-LIKE 3 [Medicago truncatula]	GO:0003674(molecular_function);GO:0005634(nucleus)	00590(Arachidonic acid metabolism);00480(Glutathione metabolism)	EC:1.11.1.9
circRNA239	0	0	0	0	0	0	0	0	0	0	0	0	0	no	1	1	no	chr4.2	85233983	85290684	-	1	intergenic	intergenic_circRNA	intergenic_circRNA	chr4.2:85233982-85290684	NA	NA	NA	NA
circRNA41	0	0	0	127.239	0	0	0	0	0	11	0	0	-inf	down	1	1	no	chr6.1	65367361	65395388	-	1	intergenic	intergenic_circRNA	intergenic_circRNA	chr6.1:65367360-65395388	NA	NA	NA	NA
circRNA109	0	0	0	0	0	33.5233	0	0	0	0	0	3	-inf	down	1	1	no	chr7.1	77589789	77593494	+	4	circRNA	MS.gene022091.t1	MS.gene022091	chr7.1:77589005-77589788|chr7.1:77593494-77594939	cell division cycle protein 27 b-like [Trifolium pratense]	GO:0005515(protein binding);GO:0005634(nucleus);GO:0005680(anaphase-promoting complex);GO:0005819(spindle);GO:0007049(cell cycle);GO:0007276(gamete generation);GO:0007346(regulation of mitotic cell cycle);GO:0009504(cell plate);GO:0009733(response to auxin);GO:0010071(root meristem specification);GO:0016567(protein ubiquitination);GO:0030154(cell differentiation);GO:0048364(root development);GO:0…	04120(Ubiquitin mediated proteolysis)	NA
circRNA89	0	0	0	0	580.027	0	0	0	0	0	25	0	-inf	down	1	1	no	chr6.3	22826005	22826217	-	1	circRNA	MS.gene74655.t1		chr6.3:22825550-22826005|chr6.3:22826293-22826795	chlorophyll a-b binding protein 6, chloroplastic [Medicago truncatula]	GO:0009416(response to light stimulus);GO:0009535(chloroplast thylakoid membrane);GO:0009768(photosynthesis, light harvesting in photosystem I);GO:0009941(chloroplast envelope);GO:0010287(plastoglobule);GO:0016168(chlorophyll binding);GO:0031409(pigment binding)	00196(Photosynthesis - antenna proteins)	NA
circRNA153	0	0	0	0	0	0	0	0	0	0	0	0	0	no	1	1	no	chr1.3	12241389	12253744	+	1	intergenic	intergenic_circRNA	intergenic_circRNA	chr1.3:12241388-12253744	NA	NA	NA	NA
circRNA255	17.4241	0	0	0	0	0	1	0	0	0	0	0	inf	up	1	1	no	chr1.1	69866333	69866721	-	2	circRNA	MS.gene88839.t1	MS.gene88839	chr1.1:69865766-69866332|chr1.1:69866721-69867908	tyrosine phosphatase [Medicago truncatula]	GO:0004725(protein tyrosine phosphatase activity);GO:0005515(protein binding);GO:0005622(intracellular);GO:0005634(nucleus);GO:0005737(cytoplasm);GO:0005829(cytosol);GO:0005886(plasma membrane);GO:0006952(defense response);GO:0031348(negative regulation of defense response);GO:0033550(MAP kinase tyrosine phosphatase activity);GO:0035556(intracellular signal transduction)	NA	NA
ciRNA14	0	0	0	46.2688	0	0	0	0	0	4	0	0	-inf	down	1	1	no	chr5.1	27889160	27889341	-	1	ciRNA	MS.gene49660.t1	MS.gene49660	chr5.1:27889117-27889341	transcription factor BHLH089 [Medicago truncatula]	GO:0005634(nucleus)	NA	NA
ciRNA98	69.6965	0	0	0	0	0	4	0	0	0	0	0	inf	up	1	1	no	chr4.4	23988623	23988903	-	1	ciRNA	MS.gene33801.t1	MS.gene33801	chr4.4:23988589-23988903	DUF616 family protein [Medicago truncatula]	GO:0016021(integral component of membrane);GO:0016757(transferase activity, transferring glycosyl groups)	NA	NA
circRNA260	34.8483	0	0	0	0	0	2	0	0	0	0	0	inf	up	1	1	no	chr3.1	12936673	13090505	-	1	intergenic	intergenic_circRNA	intergenic_circRNA	chr3.1:12936672-13090505	NA	NA	NA	NA
circRNA91	0	0	0	0	0	11.1744	0	0	0	0	0	1	-inf	down	1	1	no	chr6.3	59236323	59236471	+	1	circRNA	MS.gene33259.t1	MS.gene33259	chr6.3:59235976-59236322|chr6.3:59236471-59240289	uncharacterized protein LOC25497161 [Medicago truncatula]	GO:0004222(metalloendopeptidase activity);GO:0005739(mitochondrion);GO:0006508(proteolysis);GO:0016020(membrane);GO:0016021(integral component of membrane)	NA	NA
circRNA142	17.4241	0	0	0	0	0	1	0	0	0	0	0	inf	up	1	1	no	chr1.3	21852809	21853840	-	2	circRNA	MS.gene91106.t1	MS.gene91106	chr1.3:21852515-21852808|chr1.3:21853840-21854240	AUGMIN subunit 3 [Medicago truncatula]	GO:0003674(molecular_function);GO:0005634(nucleus);GO:0005813(centrosome);GO:0005819(spindle);GO:0005874(microtubule);GO:0007098(centrosome cycle);GO:0009524(phragmoplast);GO:0051225(spindle assembly);GO:0051301(cell division);GO:0070652(HAUS complex);GO:0080175(phragmoplast microtubule organization)	NA	NA
circRNA302	0	0	15.4623	0	0	0	0	0	1	0	0	0	inf	up	1	1	no	chr6.3	8447092	8447728	-	2	circRNA	MS.gene86065.t1	MS.gene86065	chr6.3:8446799-8447091|chr6.3:8447728-8449164	chorismate mutase 1, chloroplastic [Medicago truncatula]	GO:0004106(chorismate mutase activity);GO:0005829(cytosol);GO:0009073(aromatic amino acid family biosynthetic process);GO:0009507(chloroplast);GO:0009536(plastid);GO:0016688(L-ascorbate peroxidase activity);GO:0046417(chorismate metabolic process);GO:0055114(oxidation-reduction process);GO:0098869(cellular oxidant detoxification)	00400(Phenylalanine, tyrosine and tryptophan biosynthesis)	EC:5.4.99.5
ciRNA16	0	0	0	0	23.2011	0	0	0	0	0	1	0	-inf	down	1	1	no	chr2.3	24634396	24634843	-	1	ciRNA	MS.gene039237.t1	MS.gene039237	chr2.3:24634375-24634843	putative 26S proteasome complex ubiquitin receptor, subunit Rpn13, UCH-binding protein [Medicago truncatula]	GO:0009416(response to light stimulus)	03050(Proteasome)	NA
circRNA66	0	0	0	0	23.2011	0	0	0	0	0	1	0	-inf	down	1	1	no	chr5.1	13913392	13914345	+	4	circRNA	MS.gene64824.t1	MS.gene64824	chr5.1:13913013-13913391|chr5.1:13914345-13915103	putative UDP-glucuronosyl/UDP-glucosyltransferase [Medicago truncatula]	GO:0009813(flavonoid biosynthetic process);GO:0043231(intracellular membrane-bounded organelle);GO:0052696(flavonoid glucuronidation);GO:0080043(quercetin 3-O-glucosyltransferase activity);GO:0080044(quercetin 7-O-glucosyltransferase activity)	03040(Spliceosome)	NA
ciRNA42	0	0	0	0	0	0	0	0	0	0	0	0	0	no	1	1	no	chr6.2	4505703	4505939	-	1	ciRNA	MS.gene54740.t1	MS.gene54740	chr6.2:4505289-4505939	paired amphipathic helix protein Sin3-like 2 isoform X2 [Medicago truncatula]	GO:0000118(histone deacetylase complex);GO:0000122(negative regulation of transcription by RNA polymerase II);GO:0000785(chromatin);GO:0004407(histone deacetylase activity);GO:0016575(histone deacetylation)	NA	NA
circRNA242	0	0	0	0	0	0	0	0	0	0	0	0	0	no	1	1	no	chr6.2	2621199	2738416	-	1	intergenic	intergenic_circRNA	intergenic_circRNA	chr6.2:2621198-2738416	NA	NA	NA	NA
circRNA80	0	0	0	0	324.815	0	0	0	0	0	14	0	-inf	down	1	1	no	chr6.4	96876	100828	+	1	intergenic	intergenic_circRNA	intergenic_circRNA	chr6.4:96875-100828	NA	NA	NA	NA
circRNA323	0	0	30.9247	0	0	0	0	0	2	0	0	0	inf	up	1	1	no	chr8.3	63008098	63008520	-	2	circRNA	MS.gene001757.t1		chr8.3:63008023-63008098|chr8.3:63008520-63008602	K(+) efflux antiporter 2, chloroplastic [Medicago truncatula]	GO:0009507(chloroplast);GO:0009658(chloroplast organization);GO:0009941(chloroplast envelope);GO:0010109(regulation of photosynthesis);GO:0015079(potassium ion transmembrane transporter activity);GO:0015386(potassium:proton antiporter activity);GO:0016020(membrane);GO:0016021(integral component of membrane);GO:0031969(chloroplast membrane)	NA	NA
circRNA84	0	0	0	0	510.424	0	0	0	0	0	22	0	-inf	down	1	1	no	chr7.3	79618386	79620294	+	1	intergenic	intergenic_circRNA	intergenic_circRNA	chr7.3:79618385-79620294	NA	NA	NA	NA
ciRNA129	0	0	46.387	0	0	0	0	0	3	0	0	0	inf	up	1	1	no	chr5.2	59154212	59154628	+	1	ciRNA	MS.gene44868.t1	MS.gene44868	chr5.2:59154211-59154656	ATP-dependent zinc metalloprotease FTSH 9, chloroplastic [Medicago truncatula]	GO:0004176(ATP-dependent peptidase activity);GO:0005739(mitochondrion);GO:0006508(proteolysis);GO:0008237(metallopeptidase activity);GO:0009941(chloroplast envelope)	NA	NA
ciRNA89	0	0	0	0	0	0	0	0	0	0	0	0	0	no	1	1	no	chr3.3	84237935	84238148	+	1	ciRNA	MS.gene38712.t1	MS.gene38712	chr3.3:84237934-84238214	thioredoxin-like 4, chloroplastic [Medicago truncatula]	GO:0000103(sulfate assimilation);GO:0005737(cytoplasm);GO:0006457(protein folding);GO:0015035(protein disulfide oxidoreductase activity);GO:0016671(oxidoreductase activity, acting on a sulfur group of donors, disulfide as acceptor);GO:0034599(cellular response to oxidative stress);GO:0045454(cell redox homeostasis);GO:0055114(oxidation-reduction process)	NA	NA
circRNA106	0	0	0	0	0	22.3489	0	0	0	0	0	2	-inf	down	1	1	no	chr3.1	56180154	56181386	-	6	circRNA	MS.gene63469.t1	MS.gene63469	chr3.1:56180044-56180153|chr3.1:56181386-56182088	protein FIZZY-RELATED 3 [Medicago truncatula]	GO:0005515(protein binding);GO:0005634(nucleus);GO:0005834(heterotrimeric G-protein complex);GO:0007049(cell cycle);GO:0007165(signal transduction);GO:0010997(anaphase-promoting complex binding);GO:0016567(protein ubiquitination);GO:0051301(cell division);GO:0097027(ubiquitin-protein transferase activator activity);GO:1904668(positive regulation of ubiquitin protein ligase activity)	04120(Ubiquitin mediated proteolysis)	NA
circRNA193	0	0	0	0	0	0	0	0	0	0	0	0	0	no	1	1	no	chr2.1	56743317	56801445	-	1	intergenic	intergenic_circRNA	intergenic_circRNA	chr2.1:56743316-56801445	NA	NA	NA	NA
circRNA230	0	0	0	0	0	0	0	0	0	0	0	0	0	no	1	1	no	chr2.4	31895699	31942769	+	1	intergenic	intergenic_circRNA	intergenic_circRNA	chr2.4:31895698-31942769	NA	NA	NA	NA
circRNA124	0	0	0	0	0	122.919	0	0	0	0	0	11	-inf	down	1	1	no	chr5.2	50678000	50711535	-	1	intergenic	intergenic_circRNA	intergenic_circRNA	chr5.2:50677999-50711535	NA	NA	NA	NA
circRNA71	0	0	0	0	116.005	0	0	0	0	0	5	0	-inf	down	1	1	no	chr4.1	66996205	67022098	-	1	intergenic	intergenic_circRNA	intergenic_circRNA	chr4.1:66996204-67022098	NA	NA	NA	NA
circRNA132	0	0	0	0	0	44.6977	0	0	0	0	0	4	-inf	down	1	1	no	chr7.4	37075610	37269723	+	1	intergenic	intergenic_circRNA	intergenic_circRNA	chr7.4:37075609-37269723	NA	NA	NA	NA
ciRNA80	0	0	0	0	0	0	0	0	0	0	0	0	0	no	1	1	no	chr5.4	58771666	58771973	+	1	ciRNA	MS.gene26248.t1	MS.gene26248	chr5.4:58771665-58771993	ribose-phosphate pyrophosphokinase 4 isoform X1 [Medicago truncatula]	GO:0004749(ribose phosphate diphosphokinase activity);GO:0005524(ATP binding);GO:0005737(cytoplasm);GO:0005829(cytosol);GO:0005886(plasma membrane);GO:0009116(nucleoside metabolic process);GO:0009165(nucleotide biosynthetic process);GO:0009506(plasmodesma);GO:0016301(kinase activity);GO:0016310(phosphorylation);GO:0046872(metal ion binding)	NA	NA
circRNA151	0	0	0	0	0	0	0	0	0	0	0	0	0	no	1	1	no	chr1.1	81697911	81747836	-	1	intergenic	intergenic_circRNA	intergenic_circRNA	chr1.1:81697910-81747836	NA	NA	NA	NA
circRNA271	34.8483	0	0	0	0	0	2	0	0	0	0	0	inf	up	1	1	no	chr4.4	10116536	10116682	-	1	circRNA	MS.gene28105.t1		chr4.4:10116449-10116536|chr4.4:10116724-10116810	myo-inositol-1-phosphate synthases [Medicago falcata]	GO:0004512(inositol-3-phosphate synthase activity);GO:0005737(cytoplasm);GO:0006021(inositol biosynthetic process);GO:0008654(phospholipid biosynthetic process);GO:0009793(embryo development ending in seed dormancy)	00562(Inositol phosphate metabolism)	EC:5.5.1.4
circRNA102	0	0	0	0	0	22.3489	0	0	0	0	0	2	-inf	down	1	1	no	chr4.1	30345282	30345631	+	2	circRNA	MS.gene003553.t1	MS.gene003553	chr4.1:30344883-30345281|chr4.1:30345631-30345813	E3 ubiquitin-protein ligase UPL3 [Medicago truncatula]	GO:0004842(ubiquitin-protein transferase activity);GO:0005634(nucleus);GO:0005737(cytoplasm)	04120(Ubiquitin mediated proteolysis)	EC:2.3.2.26
ciRNA76	0	0	0	0	0	0	0	0	0	0	0	0	0	no	1	1	no	chr7.3	88461680	88461857	+	1	ciRNA	MS.gene79636.t1	MS.gene79636	chr7.3:88461679-88461881	V-type proton ATPase subunit d2 [Medicago truncatula]	GO:0005773(vacuole);GO:0005774(vacuolar membrane);GO:0005794(Golgi apparatus);GO:0009506(plasmodesma);GO:0015078(proton transmembrane transporter activity);GO:0015991(ATP hydrolysis coupled proton transport);GO:0033179(proton-transporting V-type ATPase, V0 domain);GO:0046961(proton-transporting ATPase activity, rotational mechanism)	00190(Oxidative phosphorylation);04145(Phagosome)	NA
ciRNA70	0	0	0	0	0	0	0	0	0	0	0	0	0	no	1	1	no	chr3.4	73708879	73709707	-	1	ciRNA	MS.gene35466.t1	MS.gene35466	chr3.4:73708847-73709707	telomere length regulation protein TEL2 homolog [Medicago truncatula]	GO:0003674(molecular_function);GO:0005634(nucleus);GO:0005737(cytoplasm);GO:0008150(biological_process);GO:0016020(membrane)	NA	NA
circRNA168	0	0	0	0	0	0	0	0	0	0	0	0	0	no	1	1	no	chr4.4	37130482	37141727	-	1	intergenic	intergenic_circRNA	intergenic_circRNA	chr4.4:37130481-37141727	NA	NA	NA	NA
circRNA306	0	0	15.4623	0	0	0	0	0	1	0	0	0	inf	up	1	1	no	chr4.4	12998905	13000421	-	4	circRNA	MS.gene023641.t1	MS.gene023641	chr4.4:12997265-12998904|chr4.4:13000421-13000892	elongation factor 1-alpha isoform X1 [Medicago truncatula]	GO:0003924(GTPase activity);GO:0005622(intracellular);GO:0006412(translation);GO:0032790(ribosome disassembly)	03015(mRNA surveillance pathway)	NA
circRNA317	0	0	30.9247	0	0	0	0	0	2	0	0	0	inf	up	1	1	no	chr3.1	35919742	36002695	+	1	intergenic	intergenic_circRNA	intergenic_circRNA	chr3.1:35919741-36002695	NA	NA	NA	NA
ciRNA44	0	0	0	0	0	0	0	0	0	0	0	0	0	no	1	1	no	chr8.2	37309029	37309307	-	1	ciRNA	MS.gene65588.t1	MS.gene65588	chr8.2:37309004-37309307	NADPH-dependent alkenal/one oxidoreductase, chloroplastic [Medicago truncatula]	GO:0008270(zinc ion binding);GO:0009409(response to cold);GO:0009507(chloroplast);GO:0009570(chloroplast stroma);GO:0009579(thylakoid);GO:0009941(chloroplast envelope);GO:0010319(stromule);GO:0035671(enone reductase activity);GO:0035798(2-alkenal reductase (NADP+) activity);GO:0048046(apoplast);GO:0055114(oxidation-reduction process)	NA	NA
circRNA217	0	0	0	0	0	0	0	0	0	0	0	0	0	no	1	1	no	chr6.1	63551942	63554131	+	6	circRNA	MS.gene82097.t1	MS.gene82097	chr6.1:63551646-63551941|chr6.1:63554131-63554585	phosphoethanolamine N-methyltransferase [Medicago truncatula]	GO:0005737(cytoplasm);GO:0008757(S-adenosylmethionine-dependent methyltransferase activity);GO:0032259(methylation)	00564(Glycerophospholipid metabolism)	EC:2.1.1.103
circRNA282	0	12.0645	0	0	0	0	0	1	0	0	0	0	inf	up	1	1	no	chr1.3	5779401	5780403	-	3	circRNA	MS.gene051623.t1	MS.gene051623	chr1.3:5778751-5779400|chr1.3:5780403-5780763	potassium efflux antiporter [Medicago truncatula]	GO:0006813(potassium ion transport);GO:0015079(potassium ion transmembrane transporter activity);GO:0015299(solute:proton antiporter activity);GO:0015386(potassium:proton antiporter activity);GO:0016020(membrane);GO:0016021(integral component of membrane);GO:0022890(inorganic cation transmembrane transporter activity)	NA	NA
ciRNA105	0	12.0645	0	0	0	0	0	1	0	0	0	0	inf	up	1	1	no	chr2.1	17126830	17126950	+	1	ciRNA	MS.gene35323.t1	MS.gene35323	chr2.1:17126829-17126980	putative histone acetyltransferase chromatin regulator PHD family [Medicago truncatula]	GO:0003677(DNA binding);GO:0005515(protein binding);GO:0005634(nucleus);GO:0006355(regulation of transcription, DNA-templated);GO:0016746(transferase activity, transferring acyl groups);GO:0046872(metal ion binding)	NA	NA
circRNA120	0	0	0	0	0	44.6977	0	0	0	0	0	4	-inf	down	1	1	no	chr3.3	52352257	52477912	-	1	intergenic	intergenic_circRNA	intergenic_circRNA	chr3.3:52352256-52477912	NA	NA	NA	NA
circRNA53	0	0	0	23.1344	0	0	0	0	0	2	0	0	-inf	down	1	1	no	chr6.3	82209080	82209394	-	2	circRNA	MS.gene72095.t1		chr6.3:82208804-82209080|chr6.3:82209394-82210139	2-oxoglutarate-Fe(II) type oxidoreductase hxnY isoform X2 [Medicago truncatula]	GO:0051213(dioxygenase activity)	NA	NA
ciRNA60	0	0	0	0	0	0	0	0	0	0	0	0	0	no	1	1	no	chr2.1	24533486	24533733	+	1	ciRNA	MS.gene070746.t1	MS.gene070746	chr2.1:24533485-24533761	LRR receptor-like kinase [Medicago truncatula]	GO:0004674(protein serine/threonine kinase activity);GO:0005886(plasma membrane)	NA	NA
circRNA222	0	0	0	0	0	0	0	0	0	0	0	0	0	no	1	1	no	chr3.3	65779106	65779881	-	4	circRNA	MS.gene25980.t1	MS.gene25980	chr3.3:65778175-65779105|chr3.3:65779881-65780785	protein MICRORCHIDIA 6 [Medicago truncatula]	GO:0005515(protein binding);GO:0005524(ATP binding);GO:0005634(nucleus);GO:0006281(DNA repair);GO:0006952(defense response);GO:0009506(plasmodesma);GO:0009941(chloroplast envelope);GO:0016569(covalent chromatin modification);GO:0016887(ATPase activity);GO:0031935(regulation of chromatin silencing);GO:0042803(protein homodimerization activity);GO:0080188(RNA-directed DNA methylation);GO:1902290(po…	NA	NA
circRNA233	0	0	0	0	0	0	0	0	0	0	0	0	0	no	1	1	no	chr3.3	39717686	39727134	+	1	intergenic	intergenic_circRNA	intergenic_circRNA	chr3.3:39717685-39727134	NA	NA	NA	NA
circRNA307	0	0	30.9247	0	0	0	0	0	2	0	0	0	inf	up	1	1	no	chr4.2	24538880	24539444	-	3	circRNA	MS.gene39632.t1	MS.gene39632	chr4.2:24538685-24538879|chr4.2:24539444-24539809	prostaglandin reductase-3 [Medicago truncatula]	GO:0005739(mitochondrion);GO:0005777(peroxisome);GO:0008270(zinc ion binding);GO:0016491(oxidoreductase activity);GO:0036132(13-prostaglandin reductase activity);GO:0045599(negative regulation of fat cell differentiation);GO:0047522(15-oxoprostaglandin 13-oxidase activity);GO:0055114(oxidation-reduction process)	NA	NA
ciRNA20	0	0	0	0	69.6032	0	0	0	0	0	3	0	-inf	down	1	1	no	chr3.4	98125292	98125760	-	1	ciRNA	MS.gene064783.t1	MS.gene064783	chr3.4:98125264-98125760	la-related protein 1C [Medicago truncatula]	GO:0003677(DNA binding);GO:0003729(mRNA binding);GO:0009507(chloroplast);GO:0010150(leaf senescence)	NA	NA
circRNA44	0	0	0	34.7016	0	0	0	0	0	3	0	0	-inf	down	1	1	no	chr6.4	11179046	11198565	+	1	intergenic	intergenic_circRNA	intergenic_circRNA	chr6.4:11179045-11198565	NA	NA	NA	NA
circRNA133	0	0	0	0	0	134.093	0	0	0	0	0	12	-inf	down	1	1	no	chr8.3	71827706	71897940	+	1	intergenic	intergenic_circRNA	intergenic_circRNA	chr8.3:71827705-71897940	NA	NA	NA	NA
circRNA272	52.2724	0	0	0	0	0	3	0	0	0	0	0	inf	up	1	1	no	chr3.4	56108320	56110305	+	2	circRNA	MS.gene04312.t1		chr3.4:56108191-56108320|chr3.4:56110305-56110425	GATA transcription factor 24-like [Abrus precatorius]	GO:0000977(RNA polymerase II regulatory region sequence-specific DNA binding);GO:0001085(RNA polymerase II transcription factor binding);GO:0001228(transcriptional activator activity, RNA polymerase II transcription regulatory region sequence-specific DNA binding);GO:0003682(chromatin binding);GO:0005634(nucleus);GO:0005667(transcription factor complex);GO:0030154(cell differentiation)	NA	NA
circRNA63	0	0	0	0	23.2011	0	0	0	0	0	1	0	-inf	down	1	1	no	chr1.1	60369154	60369570	-	2	circRNA	MS.gene005150.t1	MS.gene005150	chr1.1:60369062-60369153|chr1.1:60369570-60370122	zeta-carotene desaturase, chloroplastic/chromoplastic [Medicago truncatula]	GO:0005739(mitochondrion);GO:0009507(chloroplast);GO:0009509(chromoplast);GO:0009941(chloroplast envelope);GO:0016117(carotenoid biosynthetic process);GO:0016120(carotene biosynthetic process);GO:0016719(carotene 7,8-desaturase activity);GO:0052886(9,9'-dicis-carotene:quinone oxidoreductase activity);GO:0052887(7,9,9'-tricis-neurosporene:quinone oxidoreductase activity);GO:0052889(9,9'-di-cis-zet…	00906(Carotenoid biosynthesis)	EC:1.3.5.6
ciRNA115	0	12.0645	0	0	0	0	0	1	0	0	0	0	inf	up	1	1	no	chr7.1	15476466	15476746	+	1	ciRNA	MS.gene017900.t1	MS.gene017900	chr7.1:15476465-15476772	enhanced ethylene response protein 5 [Medicago truncatula]	GO:0000502(proteasome complex);GO:0000973(posttranscriptional tethering of RNA polymerase II gene DNA at nuclear periphery);GO:0003690(double-stranded DNA binding);GO:0003723(RNA binding);GO:0005515(protein binding);GO:0005634(nucleus);GO:0005643(nuclear pore);GO:0005739(mitochondrion);GO:0006368(transcription elongation from RNA polymerase II promoter);GO:0009723(response to ethylene);GO:0009873…	NA	NA
circRNA197	0	0	0	0	0	0	0	0	0	0	0	0	0	no	1	1	no	chr3.4	15987175	15997714	-	1	intergenic	intergenic_circRNA	intergenic_circRNA	chr3.4:15987174-15997714	NA	NA	NA	NA
circRNA163	0	132.709	0	0	0	0	0	11	0	0	0	0	inf	up	1	1	no	chr3.3	20551059	20555579	+	1	intergenic	intergenic_circRNA	intergenic_circRNA	chr3.3:20551058-20555579	NA	NA	NA	NA
circRNA299	0	0	15.4623	0	0	0	0	0	1	0	0	0	inf	up	1	1	no	chr2.1	66517381	66518421	+	6	circRNA	MS.gene002836.t1	MS.gene002836	chr2.1:66517041-66517380|chr2.1:66518421-66518688	RecName: Full=Glutamine synthetase leaf isozyme, chloroplastic; AltName: Full=GS2; AltName: Full=Glutamate--ammonia ligase; Flags: Precursor	GO:0004356(glutamate-ammonia ligase activity)	00630(Glyoxylate and dicarboxylate metabolism);00910(Nitrogen metabolism);00250(Alanine, aspartate and glutamate metabolism);00220(Arginine biosynthesis)	EC:6.3.1.2
circRNA182	0	0	0	0	0	0	0	0	0	0	0	0	0	no	1	1	no	chr4.2	89300957	89301382	-	2	circRNA	MS.gene75381.t1	MS.gene75381	chr4.2:89298913-89300956|chr4.2:89301382-89304026	peptide deformylase 1A, chloroplastic [Medicago truncatula]	GO:0009507(chloroplast)	NA	NA
circRNA117	0	0	0	0	0	89.3955	0	0	0	0	0	8	-inf	down	1	1	no	chr2.4	30990519	30998963	-	1	intergenic	intergenic_circRNA	intergenic_circRNA	chr2.4:30990518-30998963	NA	NA	NA	NA
circRNA263	348.483	0	0	0	0	0	20	0	0	0	0	0	inf	up	1	1	no	chr3.3	13657501	13683671	+	1	intergenic	intergenic_circRNA	intergenic_circRNA	chr3.3:13657500-13683671	NA	NA	NA	NA
ciRNA51	0	0	0	0	0	0	0	0	0	0	0	0	0	no	1	1	no	chr1.3	76330244	76330716	-	1	ciRNA	MS.gene74946.t1	MS.gene74946	chr1.3:76330213-76330716	glycerate dehydrogenase [Medicago truncatula]	GO:0005829(cytosol);GO:0016618(hydroxypyruvate reductase activity);GO:0030267(glyoxylate reductase (NADP) activity)	00630(Glyoxylate and dicarboxylate metabolism);00260(Glycine, serine and threonine metabolism)	NA
circRNA178	0	0	0	0	0	0	0	0	0	0	0	0	0	no	1	1	no	chr2.1	39688808	39689280	-	3	circRNA	MS.gene97272.t1	MS.gene97272	chr2.1:39688283-39688807|chr2.1:39689280-39689350	protein TSS isoform X1 [Medicago truncatula]	GO:0005634(nucleus);GO:0005737(cytoplasm);GO:0005829(cytosol)	NA	NA
ciRNA118	0	24.129	0	0	0	0	0	2	0	0	0	0	inf	up	1	1	no	chr7.2	31818262	31818775	-	1	ciRNA	MS.gene42075.t1	MS.gene42075	chr7.2:31818230-31818775	transcription factor TFIID protein [Medicago truncatula]	GO:0003677(DNA binding);GO:0005515(protein binding);GO:0005634(nucleus);GO:0006352(DNA-templated transcription, initiation);GO:0006355(regulation of transcription, DNA-templated);GO:0016021(integral component of membrane);GO:0017025(TBP-class protein binding)	03022(Basal transcription factors)	NA
circRNA284	0	12.0645	0	0	0	0	0	1	0	0	0	0	inf	up	1	1	no	chr5.3	60869354	60871952	-	9	circRNA	MS.gene009632.t1	MS.gene009632	chr5.3:60867610-60869353|chr5.3:60871952-60874180	ABC transporter B family member 25, mitochondrial isoform X2 [Medicago truncatula]	GO:0005743(mitochondrial inner membrane);GO:0006879(cellular iron ion homeostasis);GO:0016021(integral component of membrane);GO:0042626(ATPase activity, coupled to transmembrane movement of substances);GO:0055085(transmembrane transport)	02010(ABC transporters)	NA
circRNA207	0	0	0	0	0	0	0	0	0	0	0	0	0	no	1	1	no	chr7.4	37530091	37681115	+	1	intergenic	intergenic_circRNA	intergenic_circRNA	chr7.4:37530090-37681115	NA	NA	NA	NA
ciRNA112	0	12.0645	0	0	0	0	0	1	0	0	0	0	inf	up	1	1	no	chr4.3	87767275	87767520	+	1	ciRNA	MS.gene65429.t1	MS.gene65429	chr4.3:87767274-87767546	uncharacterized protein LOC25491211 [Medicago truncatula]	GO:0004386(helicase activity);GO:0005634(nucleus)	NA	NA
circRNA78	0	0	0	0	69.6032	0	0	0	0	0	3	0	-inf	down	1	1	no	chr5.3	56132821	56143477	-	1	intergenic	intergenic_circRNA	intergenic_circRNA	chr5.3:56132820-56143477	NA	NA	NA	NA
circRNA186	0	0	0	0	0	0	0	0	0	0	0	0	0	no	1	1	no	chr5.1	16067716	16067985	-	1	circRNA	MS.gene86456.t1	MS.gene86456	chr5.1:16060814-16067715|chr5.1:16067985-16068787	long-chain-alcohol oxidase FAO4A [Medicago truncatula]	GO:0046577(long-chain-alcohol oxidase activity)	NA	NA
ciRNA63	0	0	0	0	0	0	0	0	0	0	0	0	0	no	1	1	no	chr6.2	68239548	68240076	-	1	ciRNA	MS.gene029939.t1	MS.gene029939	chr6.2:68239530-68240076	chlorophyll a-b binding protein CP26, chloroplastic [Medicago truncatula]	GO:0009416(response to light stimulus);GO:0009535(chloroplast thylakoid membrane);GO:0009768(photosynthesis, light harvesting in photosystem I);GO:0009941(chloroplast envelope);GO:0010287(plastoglobule);GO:0016168(chlorophyll binding);GO:0031409(pigment binding)	00196(Photosynthesis - antenna proteins)	NA
circRNA287	0	24.129	0	0	0	0	0	2	0	0	0	0	inf	up	1	1	no	chr3.1	14201550	14217028	+	1	intergenic	intergenic_circRNA	intergenic_circRNA	chr3.1:14201549-14217028	NA	NA	NA	NA
circRNA149	0	0	0	0	0	0	0	0	0	0	0	0	0	no	1	1	no	chr5.4	47079526	47080491	+	2	circRNA	MS.gene94112.t1	MS.gene94112	chr5.4:47078776-47079525|chr5.4:47080491-47083264	mediator of RNA polymerase II transcription subunit 1 [Medicago truncatula]	GO:0005634(nucleus);GO:0016301(kinase activity);GO:0016310(phosphorylation)	NA	NA
circRNA39	0	0	0	34.7016	0	0	0	0	0	3	0	0	-inf	down	1	1	no	chr5.1	57760521	57769526	+	1	intergenic	intergenic_circRNA	intergenic_circRNA	chr5.1:57760520-57769526	NA	NA	NA	NA
circRNA3	0	0	0	11.5672	0	0	0	0	0	1	0	0	-inf	down	1	1	no	chr2.4	67601351	67604980	-	4	circRNA	MS.gene004371.t1	MS.gene004371	chr2.4:67600407-67601350|chr2.4:67604980-67605046	serine carboxypeptidase-like 2 [Medicago truncatula]	GO:0004185(serine-type carboxypeptidase activity);GO:0016747(transferase activity, transferring acyl groups other than amino-acyl groups);GO:0019748(secondary metabolic process);GO:0051603(proteolysis involved in cellular protein catabolic process)	NA	NA
ciRNA109	0	12.0645	0	0	0	0	0	1	0	0	0	0	inf	up	1	1	no	chr6.2	14391871	14392308	+	1	ciRNA	MS.gene074247.t1	MS.gene074247	chr6.2:14391870-14392326	RecName: Full=Ribulose bisphosphate carboxylase small chain, chloroplastic; Short=RuBisCO small subunit; Flags: Precursor	GO:0004497(monooxygenase activity);GO:0005507(copper ion binding);GO:0009409(response to cold);GO:0009507(chloroplast);GO:0009535(chloroplast thylakoid membrane);GO:0009536(plastid);GO:0009570(chloroplast stroma);GO:0009573(chloroplast ribulose bisphosphate carboxylase complex);GO:0009579(thylakoid);GO:0009637(response to blue light);GO:0009853(photorespiration);GO:0009941(chloroplast envelope);G…	00630(Glyoxylate and dicarboxylate metabolism);00710(Carbon fixation in photosynthetic organisms)	EC:4.1.1.39
circRNA250	34.8483	0	0	0	0	0	2	0	0	0	0	0	inf	up	1	1	no	chr6.3	8499512	8500596	+	3	circRNA	MS.gene86071.t1	MS.gene86071	chr6.3:8498769-8499511|chr6.3:8500596-8501009	hypothetical protein MtrunA17_Chr6g0454011 [Medicago truncatula]	GO:0007623(circadian rhythm);GO:0009507(chloroplast);GO:0016874(ligase activity)	03030(DNA replication);03420(Nucleotide excision repair);03430(Mismatch repair)	NA
circRNA248	0	0	0	0	0	0	0	0	0	0	0	0	0	no	1	1	no	chr6.4	15153641	15153899	+	2	circRNA	MS.gene85851.t1		chr6.4:15151825-15153641|chr6.4:15153899-15154400	DEAD-box ATP-dependent RNA helicase 39 [Medicago truncatula]	GO:0004004(ATP-dependent RNA helicase activity);GO:0010501(RNA secondary structure unwinding)	NA	NA
circRNA6	0	0	0	34.7016	0	0	0	0	0	3	0	0	-inf	down	1	1	no	chr8.2	79047093	79047689	-	3	circRNA	MS.gene36776.t1	MS.gene36776	chr8.2:79047008-79047092|chr8.2:79047689-79047772	homeobox-leucine zipper protein ATHB-15 [Medicago truncatula]	GO:0003677(DNA binding);GO:0003700(DNA binding transcription factor activity);GO:0005634(nucleus);GO:0006351(transcription, DNA-templated);GO:0006355(regulation of transcription, DNA-templated);GO:0008289(lipid binding);GO:0009855(determination of bilateral symmetry);GO:0009965(leaf morphogenesis);GO:0010014(meristem initiation);GO:0010073(meristem maintenance);GO:0010075(regulation of meristem g…	NA	NA
ciRNA48	0	0	0	0	0	0	0	0	0	0	0	0	0	no	1	1	no	chr3.3	61537099	61537275	+	1	ciRNA	MS.gene008068.t1	MS.gene008068	chr3.3:61537098-61540297	cytochrome P450 90A1 [Medicago truncatula]	GO:0004497(monooxygenase activity);GO:0007275(multicellular organism development);GO:0010268(brassinosteroid homeostasis);GO:0016125(sterol metabolic process);GO:0016132(brassinosteroid biosynthetic process)	00905(Brassinosteroid biosynthesis)	NA
ciRNA67	0	0	0	0	0	0	0	0	0	0	0	0	0	no	1	1	no	chr4.3	21369752	21369918	+	1	ciRNA	MS.gene40101.t1	MS.gene40101	chr4.3:21369751-21370544	putative glutathione-regulated potassium-efflux system protein KefB [Medicago truncatula]	GO:0009507(chloroplast);GO:0009658(chloroplast organization);GO:0009941(chloroplast envelope);GO:0010109(regulation of photosynthesis);GO:0015079(potassium ion transmembrane transporter activity);GO:0015386(potassium:proton antiporter activity);GO:0016020(membrane);GO:0016021(integral component of membrane);GO:0031969(chloroplast membrane)	NA	NA
circRNA35	0	0	0	185.075	0	0	0	0	0	16	0	0	-inf	down	1	1	no	chr4.2	85035361	85233542	-	1	intergenic	intergenic_circRNA	intergenic_circRNA	chr4.2:85035360-85233542	NA	NA	NA	NA
circRNA171	0	0	0	0	0	0	0	0	0	0	0	0	0	no	1	1	no	chr7.2	44649690	44706844	-	1	intergenic	intergenic_circRNA	intergenic_circRNA	chr7.2:44649689-44706844	NA	NA	NA	NA
circRNA236	0	0	0	0	0	0	0	0	0	0	0	0	0	no	1	1	no	chr4.2	85033293	85159088	-	1	intergenic	intergenic_circRNA	intergenic_circRNA	chr4.2:85033292-85159088	NA	NA	NA	NA
circRNA107	0	0	0	0	0	11.1744	0	0	0	0	0	1	-inf	down	1	1	no	chr1.2	59322770	59323593	-	3	circRNA	MS.gene40776.t1	MS.gene40776	chr1.2:59322073-59322769|chr1.2:59323593-59324533	phospholipase/carboxylesterase family protein [Medicago truncatula]	GO:0003674(molecular_function);GO:0005634(nucleus);GO:0008150(biological_process)	04016(MAPK signaling pathway - plant);04070(Phosphatidylinositol signaling system);04626(Plant-pathogen interaction)	NA
ciRNA94	0	0	0	0	0	0	0	0	0	0	0	0	0	no	1	1	no	chr7.2	3008145	3009370	+	1	ciRNA	MS.gene050491.t1	MS.gene050491	chr7.2:3008144-3009390	transducin/WD40 repeat protein [Medicago truncatula]	GO:0000166(nucleotide binding);GO:0005634(nucleus);GO:0010311(lateral root formation);GO:0043130(ubiquitin binding);GO:0080008(Cul4-RING E3 ubiquitin ligase complex)	NA	NA
circRNA252	17.4241	0	0	0	0	0	1	0	0	0	0	0	inf	up	1	1	no	chr3.1	79561132	79564239	+	6	circRNA	MS.gene013128.t1	MS.gene013128	chr3.1:79560681-79561131|chr3.1:79564239-79565968	isoamylase 3, chloroplastic isoform X2 [Medicago truncatula]	GO:0004556(alpha-amylase activity);GO:0005975(carbohydrate metabolic process);GO:0005983(starch catabolic process);GO:0009507(chloroplast);GO:0009569(chloroplast starch grain);GO:0009570(chloroplast stroma);GO:0019156(isoamylase activity)	00500(Starch and sucrose metabolism)	EC:3.2.1.68
circRNA267	52.2724	0	0	0	0	0	3	0	0	0	0	0	inf	up	1	1	no	chr5.1	4417282	4431000	-	1	intergenic	intergenic_circRNA	intergenic_circRNA	chr5.1:4417281-4431000	NA	NA	NA	NA
circRNA167	0	0	0	0	0	0	0	0	0	0	0	0	0	no	1	1	no	chr4.4	10599436	10609781	-	1	intergenic	intergenic_circRNA	intergenic_circRNA	chr4.4:10599435-10609781	NA	NA	NA	NA
circRNA125	0	0	0	0	0	44.6977	0	0	0	0	0	4	-inf	down	1	1	no	chr5.3	49218756	49234254	-	1	intergenic	intergenic_circRNA	intergenic_circRNA	chr5.3:49218755-49234254	NA	NA	NA	NA
circRNA303	0	0	46.387	0	0	0	0	0	3	0	0	0	inf	up	1	1	no	chr6.2	491110	491571	+	2	circRNA	MS.gene053082.t1	MS.gene053082	chr6.2:490580-491109|chr6.2:491571-492319	putative dual-specificity kinase TKL-Pl-4 family [Medicago truncatula]	GO:0004672(protein kinase activity);GO:0004674(protein serine/threonine kinase activity);GO:0004712(protein serine/threonine/tyrosine kinase activity);GO:0005524(ATP binding);GO:0006468(protein phosphorylation);GO:0016301(kinase activity)	NA	NA
ciRNA83	0	0	0	0	0	0	0	0	0	0	0	0	0	no	1	1	no	chr2.3	22012222	22012425	+	1	ciRNA	MS.gene72474.t1	MS.gene72474	chr2.3:22012221-22012451	LRR receptor-like kinase [Medicago truncatula]	GO:0004674(protein serine/threonine kinase activity);GO:0005886(plasma membrane)	NA	NA
ciRNA8	0	0	0	11.5672	0	0	0	0	0	1	0	0	-inf	down	1	1	no	chr3.3	70755205	70755368	+	1	ciRNA	MS.gene75658.t1	MS.gene75658	chr3.3:70755204-70755392	bifunctional aspartokinase/homoserine dehydrogenase 2, chloroplastic isoform X1 [Medicago truncatula]	GO:0004072(aspartate kinase activity);GO:0004412(homoserine dehydrogenase activity);GO:0005524(ATP binding);GO:0009067(aspartate family amino acid biosynthetic process);GO:0009086(methionine biosynthetic process);GO:0009088(threonine biosynthetic process);GO:0009089(lysine biosynthetic process via diaminopimelate);GO:0009090(homoserine biosynthetic process);GO:0009507(chloroplast);GO:0009570(chlo…	00260(Glycine, serine and threonine metabolism);00270(Cysteine and methionine metabolism);00300(Lysine biosynthesis);00261(Monobactam biosynthesis)	EC:1.1.1.3
circRNA211	0	0	0	0	0	0	0	0	0	0	0	0	0	no	1	1	no	chr8.3	5100906	5105384	-	1	intergenic	intergenic_circRNA	intergenic_circRNA	chr8.3:5100905-5105384	NA	NA	NA	NA
circRNA129	0	0	0	0	0	22.3489	0	0	0	0	0	2	-inf	down	1	1	no	chr7.2	88352589	88389620	+	1	intergenic	intergenic_circRNA	intergenic_circRNA	chr7.2:88352588-88389620	NA	NA	NA	NA
circRNA136	17.4241	0	0	0	0	0	1	0	0	0	0	0	inf	up	1	1	no	chr6.2	8687397	8688481	+	3	circRNA	MS.gene031126.t1	MS.gene031126	chr6.2:8686660-8687396|chr6.2:8688481-8688894	hypothetical protein MtrunA17_Chr6g0454011 [Medicago truncatula]	GO:0007623(circadian rhythm);GO:0009507(chloroplast);GO:0016874(ligase activity)	03030(DNA replication);03420(Nucleotide excision repair);03430(Mismatch repair)	NA
ciRNA123	0	0	15.4623	0	0	0	0	0	1	0	0	0	inf	up	1	1	no	chr4.1	20463835	20464160	+	1	ciRNA	MS.gene028525.t1	MS.gene028525	chr4.1:20463834-20464178	putative glutathione-regulated potassium-efflux system protein KefB [Medicago truncatula]	GO:0009507(chloroplast);GO:0009658(chloroplast organization);GO:0009941(chloroplast envelope);GO:0010109(regulation of photosynthesis);GO:0015079(potassium ion transmembrane transporter activity);GO:0015386(potassium:proton antiporter activity);GO:0016020(membrane);GO:0016021(integral component of membrane);GO:0031969(chloroplast membrane)	NA	NA
circRNA261	104.545	0	0	0	0	0	6	0	0	0	0	0	inf	up	1	1	no	chr3.1	12937420	12988795	-	1	intergenic	intergenic_circRNA	intergenic_circRNA	chr3.1:12937419-12988795	NA	NA	NA	NA
circRNA140	0	0	0	0	0	0	0	0	0	0	0	0	0	no	1	1	no	chr1.4	68838529	68839352	-	3	circRNA	MS.gene21035.t1	MS.gene21035	chr1.4:68837832-68838528|chr1.4:68839352-68840292	phospholipase/carboxylesterase family protein [Medicago truncatula]	GO:0003674(molecular_function);GO:0005634(nucleus);GO:0008150(biological_process)	04016(MAPK signaling pathway - plant);04070(Phosphatidylinositol signaling system);04626(Plant-pathogen interaction)	NA
circRNA283	0	12.0645	0	0	0	0	0	1	0	0	0	0	inf	up	1	1	no	chr1.1	82005446	82006978	+	3	circRNA	MS.gene90121.t1	MS.gene90121	chr1.1:82003892-82005445|chr1.1:82006978-82007903	callose synthase 9 [Medicago truncatula]	GO:0000148(1,3-beta-D-glucan synthase complex);GO:0003843(1,3-beta-D-glucan synthase activity);GO:0005886(plasma membrane)	NA	NA
circRNA223	0	0	0	0	0	0	0	0	0	0	0	0	0	no	1	1	no	chr1.2	77067519	77067865	-	2	circRNA	MS.gene006441.t1	MS.gene006441	chr1.2:77066886-77067518|chr1.2:77067865-77068367	folate-biopterin transporter 1, chloroplastic [Medicago truncatula]	GO:0005215(transporter activity);GO:0006810(transport);GO:0008517(folic acid transmembrane transporter activity);GO:0009507(chloroplast);GO:0009941(chloroplast envelope);GO:0015231(5-formyltetrahydrofolate transmembrane transporter activity);GO:0015350(methotrexate transmembrane transporter activity);GO:0016020(membrane);GO:0016021(integral component of membrane);GO:0031969(chloroplast membrane);…	NA	NA
ciRNA97	17.4241	0	0	0	0	0	1	0	0	0	0	0	inf	up	1	1	no	chr6.3	14087766	14088194	+	1	ciRNA	MS.gene074566.t1	MS.gene074566	chr6.3:14087765-14088219	RecName: Full=Ribulose bisphosphate carboxylase small chain, chloroplastic; Short=RuBisCO small subunit; Flags: Precursor	GO:0004497(monooxygenase activity);GO:0005507(copper ion binding);GO:0009409(response to cold);GO:0009507(chloroplast);GO:0009535(chloroplast thylakoid membrane);GO:0009536(plastid);GO:0009570(chloroplast stroma);GO:0009573(chloroplast ribulose bisphosphate carboxylase complex);GO:0009579(thylakoid);GO:0009637(response to blue light);GO:0009853(photorespiration);GO:0009941(chloroplast envelope);G…	00630(Glyoxylate and dicarboxylate metabolism);00710(Carbon fixation in photosynthetic organisms)	EC:4.1.1.39
ciRNA103	34.8483	0	0	0	0	0	2	0	0	0	0	0	inf	up	1	1	no	chr5.3	28590992	28591156	-	1	ciRNA	MS.gene032908.t1	MS.gene032908	chr5.3:28590371-28591156	probable apyrase 6 [Medicago truncatula]	GO:0005524(ATP binding);GO:0009901(anther dehiscence);GO:0010584(pollen exine formation);GO:0016021(integral component of membrane);GO:0016787(hydrolase activity);GO:0030659(cytoplasmic vesicle membrane);GO:0102485(dATP phosphohydrolase activity);GO:0102486(dCTP phosphohydrolase activity);GO:0102487(dUTP phosphohydrolase activity);GO:0102488(dTTP phosphohydrolase activity);GO:0102489(GTP phosphoh…	00230(Purine metabolism);00240(Pyrimidine metabolism)	EC:3.6.1.5
circRNA234	0	0	0	0	0	0	0	0	0	0	0	0	0	no	1	1	no	chr3.4	56141687	56165923	-	1	intergenic	intergenic_circRNA	intergenic_circRNA	chr3.4:56141686-56165923	NA	NA	NA	NA
circRNA183	0	0	0	0	0	0	0	0	0	0	0	0	0	no	1	1	no	chr4.1	88465544	88466078	-	2	circRNA	MS.gene034247.t1	MS.gene034247	chr4.1:88464720-88465543|None	uncharacterized protein LOC25491183 [Medicago truncatula]	GO:0000785(chromatin);GO:0005634(nucleus);GO:0006281(DNA repair);GO:0007064(mitotic sister chromatid cohesion)	NA	NA
circRNA67	0	0	0	0	162.408	0	0	0	0	0	7	0	-inf	down	1	1	no	chr3.1	12937420	12988845	-	1	intergenic	intergenic_circRNA	intergenic_circRNA	chr3.1:12937419-12988845	NA	NA	NA	NA
ciRNA52	0	0	0	0	0	0	0	0	0	0	0	0	0	no	1	1	no	chr1.1	2297531	2298083	-	1	ciRNA	MS.gene24295.t1	MS.gene24295	chr1.1:2297504-2298083	DNA-directed RNA polymerase [Medicago truncatula]	GO:0001056(RNA polymerase III activity);GO:0005666(DNA-directed RNA polymerase III complex)	00230(Purine metabolism);00240(Pyrimidine metabolism);03020(RNA polymerase)	EC:2.7.7.6
circRNA93	0	0	0	0	0	55.8722	0	0	0	0	0	5	-inf	down	1	1	no	chr6.2	62755616	62755764	+	1	circRNA	MS.gene66544.t1	MS.gene66544	chr6.2:62755269-62755615|chr6.2:62755764-62758010	uncharacterized protein LOC25497161 [Medicago truncatula]	GO:0004222(metalloendopeptidase activity);GO:0005739(mitochondrion);GO:0006508(proteolysis);GO:0016020(membrane);GO:0016021(integral component of membrane)	NA	NA
ciRNA10	0	0	0	11.5672	0	0	0	0	0	1	0	0	-inf	down	1	1	no	chr7.2	80409970	80411394	+	1	ciRNA	MS.gene62000.t1	MS.gene62000	chr7.2:80409969-80411411	kanadaptin [Medicago truncatula]	GO:0003674(molecular_function);GO:0005634(nucleus);GO:0008150(biological_process);GO:0016020(membrane)	NA	NA
circRNA228	0	0	0	0	0	0	0	0	0	0	0	0	0	no	1	1	no	chr2.2	19454750	19508864	+	1	intergenic	intergenic_circRNA	intergenic_circRNA	chr2.2:19454749-19508864	NA	NA	NA	NA
ciRNA59	0	0	0	0	0	0	0	0	0	0	0	0	0	no	1	1	no	chr4.2	74530822	74531115	-	1	ciRNA	MS.gene76759.t1		chr4.2:74530821-74531115	oligouridylate-binding protein 1B [Medicago truncatula]	GO:0003729(mRNA binding);GO:0003730(mRNA 3'-UTR binding);GO:0005515(protein binding);GO:0005634(nucleus);GO:0005829(cytosol);GO:0006397(mRNA processing)	NA	NA
circRNA57	0	0	0	0	23.2011	0	0	0	0	0	1	0	-inf	down	1	1	no	chr2.4	37049237	37050569	-	3	circRNA	MS.gene84399.t1	MS.gene84399	chr2.4:37048035-37049236|chr2.4:37050569-37051380	protein TSS isoform X1 [Medicago truncatula]	GO:0005634(nucleus);GO:0005737(cytoplasm);GO:0005829(cytosol)	NA	NA
circRNA320	0	0	123.699	0	0	0	0	0	8	0	0	0	inf	up	1	1	no	chr5.3	47312626	47323963	-	1	intergenic	intergenic_circRNA	intergenic_circRNA	chr5.3:47312625-47323963	NA	NA	NA	NA
circRNA101	0	0	0	0	0	22.3489	0	0	0	0	0	2	-inf	down	1	1	no	chr4.1	9308463	9308946	+	2	circRNA	MS.gene70299.t1	MS.gene70299	chr4.1:9308388-9308462|chr4.1:9308946-9309600	uncharacterized protein LOC11432180 isoform X1 [Medicago truncatula]	GO:0005730(nucleolus);GO:0005765(lysosomal membrane);GO:0005886(plasma membrane);GO:0008088(axo-dendritic transport);GO:0030424(axon);GO:0030425(dendrite);GO:0031410(cytoplasmic vesicle);GO:0045202(synapse);GO:0048675(axon extension);GO:0070062(extracellular exosome)	NA	NA
ciRNA81	0	0	0	0	0	0	0	0	0	0	0	0	0	no	1	1	no	chr8.2	69867427	69868037	-	1	ciRNA	MS.gene85997.t1		chr8.2:69867426-69868037	putative cAMP-dependent protein kinase regulatory subunit [Medicago truncatula]	GO:0005249(voltage-gated potassium channel activity);GO:0005887(integral component of plasma membrane);GO:0042391(regulation of membrane potential)	04626(Plant-pathogen interaction)	NA
ciRNA34	0	0	0	0	0	11.1744	0	0	0	0	0	1	-inf	down	1	1	no	chr3.3	77877902	77878082	+	1	ciRNA	MS.gene049435.t1	MS.gene049435	chr3.3:77877901-77878100	SET and MYND domain-containing protein 4 isoform X1 [Medicago truncatula]	GO:0005634(nucleus);GO:0008150(biological_process)	NA	NA
ciRNA75	0	0	0	0	0	0	0	0	0	0	0	0	0	no	1	1	no	chr7.2	75417099	75417935	+	1	ciRNA	MS.gene032533.t1	MS.gene032533	chr7.2:75417098-75417961	uncharacterized protein LOC11443330 [Medicago truncatula]	GO:0008150(biological_process);GO:0009507(chloroplast)	NA	NA
circRNA295	0	60.3224	0	0	0	0	0	5	0	0	0	0	inf	up	1	1	no	chr7.3	86521270	86594404	+	1	intergenic	intergenic_circRNA	intergenic_circRNA	chr7.3:86521269-86594404	NA	NA	NA	NA
circRNA280	0	12.0645	0	0	0	0	0	1	0	0	0	0	inf	up	1	1	no	chr3.4	58323179	58325370	+	8	circRNA	MS.gene04469.t1	MS.gene04469	chr3.4:58322595-58323178|chr3.4:58325370-58325934	ATP-dependent zinc metalloprotease FTSH 9, chloroplastic isoform X1 [Medicago truncatula]	GO:0004176(ATP-dependent peptidase activity);GO:0005739(mitochondrion);GO:0006508(proteolysis);GO:0008237(metallopeptidase activity);GO:0009941(chloroplast envelope)	NA	NA
circRNA187	0	0	0	0	0	0	0	0	0	0	0	0	0	no	1	1	no	chr5.1	51187406	51188166	-	3	circRNA	MS.gene050001.t1	MS.gene050001	chr5.1:51185749-51187405|chr5.1:51188166-51190560	AP-4 complex subunit mu isoform X1 [Medicago truncatula]	GO:0005634(nucleus);GO:0005802(trans-Golgi network);GO:0005829(cytosol);GO:0005905(clathrin-coated pit);GO:0006886(intracellular protein transport);GO:0016192(vesicle-mediated transport);GO:0030124(AP-4 adaptor complex);GO:0030125(clathrin vesicle coat);GO:0030131(clathrin adaptor complex)	NA	NA
circRNA146	0	0	0	0	0	0	0	0	0	0	0	0	0	no	1	1	no	chr5.2	12376451	12376615	-	1	circRNA	MS.gene64717.t1	MS.gene64717	chr5.2:12376283-12376450|chr5.2:12376615-12376699	beta-galactosidase 3 [Medicago truncatula]	GO:0004565(beta-galactosidase activity);GO:0005618(cell wall);GO:0005773(vacuole)	00052(Galactose metabolism);00600(Sphingolipid metabolism);00531(Glycosaminoglycan degradation);00604(Glycosphingolipid biosynthesis - ganglio series);00511(Other glycan degradation)	EC:3.2.1.23
ciRNA95	0	0	0	0	0	0	0	0	0	0	0	0	0	no	1	1	no	chr7.3	76796153	76796468	+	1	ciRNA	MS.gene92478.t1	MS.gene92478	chr7.3:76796152-76796497	sulfate transporter 4.1, chloroplastic isoform X1 [Medicago truncatula]	GO:0005887(integral component of plasma membrane);GO:0015116(sulfate transmembrane transporter activity)	NA	NA
circRNA218	0	0	0	0	0	0	0	0	0	0	0	0	0	no	1	1	no	chr8.2	69721031	69722529	-	4	circRNA	MS.gene86004.t1	MS.gene86004	chr8.2:69720814-69721030|chr8.2:69722529-69723079	DEAD-box ATP-dependent RNA helicase 31 [Medicago truncatula]	GO:0004004(ATP-dependent RNA helicase activity);GO:0010501(RNA secondary structure unwinding)	NA	NA
circRNA231	0	0	0	0	0	0	0	0	0	0	0	0	0	no	1	1	no	chr2.4	59156031	59234190	+	1	intergenic	intergenic_circRNA	intergenic_circRNA	chr2.4:59156030-59234190	NA	NA	NA	NA
circRNA192	0	0	0	0	0	0	0	0	0	0	0	0	0	no	1	1	no	chr2.1	56492426	56495576	-	1	intergenic	intergenic_circRNA	intergenic_circRNA	chr2.1:56492425-56495576	NA	NA	NA	NA
ciRNA43	0	0	0	0	0	0	0	0	0	0	0	0	0	no	1	1	no	chr8.3	79738870	79739068	+	1	ciRNA	MS.gene39670.t1	MS.gene39670	chr8.3:79738869-79739158	protein TRIGALACTOSYLDIACYLGLYCEROL 4, chloroplastic [Medicago truncatula]	GO:0003674(molecular_function);GO:0005634(nucleus);GO:0005739(mitochondrion);GO:0005774(vacuolar membrane);GO:0008150(biological_process);GO:0009507(chloroplast);GO:0009536(plastid);GO:0009941(chloroplast envelope)	NA	NA
ciRNA32	0	0	0	0	0	11.1744	0	0	0	0	0	1	-inf	down	1	1	no	chr3.4	85308022	85308202	+	1	ciRNA	MS.gene013459.t1	MS.gene013459	chr3.4:85308021-85308220	SET and MYND domain-containing protein 4 isoform X1 [Medicago truncatula]	GO:0005634(nucleus);GO:0008150(biological_process)	NA	NA
circRNA72	0	0	0	0	232.011	0	0	0	0	0	10	0	-inf	down	1	1	no	chr4.2	85160130	85231592	-	1	intergenic	intergenic_circRNA	intergenic_circRNA	chr4.2:85160129-85231592	NA	NA	NA	NA
circRNA14	0	0	0	11.5672	0	0	0	0	0	1	0	0	-inf	down	1	1	no	chr1.4	75722841	75723170	-	1	circRNA	MS.gene33910.t1	MS.gene33910	chr1.4:75722139-75722840|chr1.4:75723170-75723695	cleavage stimulating factor 64 [Medicago truncatula]	GO:0003729(mRNA binding);GO:0005847(mRNA cleavage and polyadenylation specificity factor complex);GO:0098789(pre-mRNA cleavage required for polyadenylation)	03015(mRNA surveillance pathway)	NA
circRNA177	0	0	0	0	0	0	0	0	0	0	0	0	0	no	1	1	no	chr8.2	54683129	54683272	+	1	intergenic	intergenic_circRNA	intergenic_circRNA	chr8.2:54683128-54683272	NA	NA	NA	NA
circRNA220	0	0	0	0	0	0	0	0	0	0	0	0	0	no	1	1	no	chr4.2	32855539	32857090	-	5	circRNA	MS.gene29086.t1	MS.gene29086	chr4.2:32854981-32855538|chr4.2:32857090-32857402	uncharacterized protein LOC11441638 [Medicago truncatula]	NA	NA	NA
circRNA311	0	0	15.4623	0	0	0	0	0	1	0	0	0	inf	up	1	1	no	chr3.2	67741442	67744425	-	3	circRNA	MS.gene022433.t1	MS.gene022433	chr3.2:67741137-67741441|chr3.2:67744425-67744584	telomere length regulation protein TEL2 homolog [Medicago truncatula]	GO:0003674(molecular_function);GO:0005634(nucleus);GO:0005737(cytoplasm);GO:0008150(biological_process);GO:0016020(membrane)	NA	NA
ciRNA17	0	0	0	0	23.2011	0	0	0	0	0	1	0	-inf	down	1	1	no	chr2.3	64173987	64174150	+	1	ciRNA	MS.gene048169.t1	MS.gene048169	chr2.3:64173986-64175829	transcription initiation factor IIF subunit alpha [Medicago truncatula]	NA	03022(Basal transcription factors)	NA
ciRNA79	0	0	0	0	0	0	0	0	0	0	0	0	0	no	1	1	no	chr5.1	69699575	69699791	-	1	ciRNA	MS.gene47029.t1	MS.gene47029	chr5.1:69699551-69699791	CBL-interacting serine/threonine-protein kinase 3 [Medicago truncatula]	GO:0004674(protein serine/threonine kinase activity);GO:0005634(nucleus);GO:0005737(cytoplasm);GO:0006468(protein phosphorylation);GO:0035556(intracellular signal transduction)	NA	NA
circRNA269	52.2724	0	0	0	0	0	3	0	0	0	0	0	inf	up	1	1	no	chr7.4	47254698	47369937	-	1	intergenic	intergenic_circRNA	intergenic_circRNA	chr7.4:47254697-47369937	NA	NA	NA	NA
circRNA205	0	144.774	0	0	0	0	0	12	0	0	0	0	inf	up	1	1	no	chr7.2	81900093	81949731	-	1	intergenic	intergenic_circRNA	intergenic_circRNA	chr7.2:81900092-81949731	NA	NA	NA	NA
circRNA54	52.2724	0	0	92.5376	0	0	3	0	0	8	0	0	-0.823991	down	1	1	no	chr6.3	79728758	79729141	-	1	circRNA	MS.gene61421.t1		chr6.3:79727754-79728758|chr6.3:79729141-79733714	aldehyde dehydrogenase family 2 member C4 [Medicago truncatula]	GO:0004029(aldehyde dehydrogenase (NAD) activity)	00940(Phenylpropanoid biosynthesis)	EC:1.2.1.68
circRNA10	0	0	0	11.5672	0	0	0	0	0	1	0	0	-inf	down	1	1	no	chr3.2	70187247	70188435	+	5	circRNA	MS.gene25827.t1	MS.gene25827	chr3.2:70187121-70187246|chr3.2:70188435-70188620	ubiquitin carboxyl-terminal hydrolase 13 isoform X1 [Medicago truncatula]	GO:0004843(thiol-dependent ubiquitin-specific protease activity);GO:0005515(protein binding);GO:0005634(nucleus);GO:0005737(cytoplasm);GO:0005829(cytosol);GO:0006511(ubiquitin-dependent protein catabolic process);GO:0009506(plasmodesma);GO:0009867(jasmonic acid mediated signaling pathway);GO:0016579(protein deubiquitination);GO:0036459(thiol-dependent ubiquitinyl hydrolase activity)	NA	NA
ciRNA71	0	0	0	0	0	0	0	0	0	0	0	0	0	no	1	1	no	chr3.4	88378916	88379032	+	1	ciRNA	MS.gene41637.t1	MS.gene41637	chr3.4:88378915-88379049	phosphatidylinositol transfer protein 3 [Medicago truncatula]	GO:0005215(transporter activity);GO:0005634(nucleus);GO:0006810(transport)	NA	NA
ciRNA25	0	0	0	0	0	22.3489	0	0	0	0	0	2	-inf	down	1	1	no	chr2.4	25182751	25182914	+	1	ciRNA	MS.gene062848.t1	MS.gene062848	chr2.4:25182750-25183787	probable glutathione S-transferase [Medicago truncatula]	GO:0004364(glutathione transferase activity);GO:0005737(cytoplasm);GO:0006749(glutathione metabolic process);GO:0009407(toxin catabolic process)	00480(Glutathione metabolism)	EC:2.5.1.18
ciRNA13	0	0	0	11.5672	0	0	0	0	0	1	0	0	-inf	down	1	1	no	chr5.1	27189291	27189552	-	1	ciRNA	MS.gene45168.t1	MS.gene45168	chr5.1:27189258-27189552	pyruvate dehydrogenase E1 component subunit alpha, mitochondrial [Medicago truncatula]	GO:0004739(pyruvate dehydrogenase (acetyl-transferring) activity);GO:0005634(nucleus);GO:0005739(mitochondrion);GO:0005759(mitochondrial matrix);GO:0005829(cytosol);GO:0006086(acetyl-CoA biosynthetic process from pyruvate);GO:0006096(glycolytic process);GO:0043231(intracellular membrane-bounded organelle);GO:0046686(response to cadmium ion);GO:0055114(oxidation-reduction process)	00010(Glycolysis / Gluconeogenesis);00020(Citrate cycle (TCA cycle));00620(Pyruvate metabolism)	EC:1.2.4.1
circRNA176	0	0	0	0	0	0	0	0	0	0	0	0	0	no	1	1	no	chr8.1	61532137	61577046	+	1	intergenic	intergenic_circRNA	intergenic_circRNA	chr8.1:61532136-61577046	NA	NA	NA	NA
ciRNA131	0	0	46.387	0	0	0	0	0	3	0	0	0	inf	up	1	1	no	chr2.1	10620430	10620582	-	1	ciRNA	MS.gene055806.t1		chr2.1:10620429-10620582	two pore calcium channel protein 1 isoform X1 [Medicago truncatula]	GO:0005245(voltage-gated calcium channel activity);GO:0005886(plasma membrane);GO:0006816(calcium ion transport);GO:0086010(membrane depolarization during action potential)	NA	NA
ciRNA86	0	0	0	0	0	0	0	0	0	0	0	0	0	no	1	1	no	chr4.4	20712500	20713297	+	1	ciRNA	MS.gene35034.t1	MS.gene35034	chr4.4:20712499-20713325	26S proteasome regulatory subunit 8 homolog A [Cicer arietinum]	GO:0008540(proteasome regulatory particle, base subcomplex);GO:0017025(TBP-class protein binding);GO:0030433(ubiquitin-dependent ERAD pathway);GO:0031595(nuclear proteasome complex);GO:0031597(cytosolic proteasome complex);GO:0036402(proteasome-activating ATPase activity);GO:0045899(positive regulation of RNA polymerase II transcriptional preinitiation complex assembly)	03050(Proteasome)	NA
circRNA221	0	0	0	0	0	0	0	0	0	0	0	0	0	no	1	1	no	chr4.3	41856155	41856427	+	2	circRNA	MS.gene062557.t1	MS.gene062557	chr4.3:41856068-41856154|chr4.3:41856427-41856503	E3 SUMO-protein ligase SIZ1 [Medicago truncatula]	GO:0005515(protein binding);GO:0016925(protein sumoylation);GO:0061665(SUMO ligase activity)	04120(Ubiquitin mediated proteolysis)	NA
ciRNA64	0	0	0	0	0	0	0	0	0	0	0	0	0	no	1	1	no	chr8.2	8653709	8653847	+	1	ciRNA	MS.gene030221.t1	MS.gene030221	chr8.2:8653708-8654727	pectinesterase/pectinesterase inhibitor PPE8B [Medicago truncatula]	GO:0030599(pectinesterase activity);GO:0046910(pectinesterase inhibitor activity);GO:0071944(cell periphery)	00040(Pentose and glucuronate interconversions)	EC:3.1.1.11
circRNA150	0	0	0	0	0	0	0	0	0	0	0	0	0	no	1	1	no	23447	97974	100280	+	1	intergenic	intergenic_circRNA	intergenic_circRNA	23447:97973-100280	NA	NA	NA	NA
circRNA37	0	0	0	92.5376	0	0	0	0	0	8	0	0	-inf	down	1	1	no	chr4.3	78229000	78254200	+	1	intergenic	intergenic_circRNA	intergenic_circRNA	chr4.3:78228999-78254200	NA	NA	NA	NA
circRNA300	0	0	15.4623	0	0	0	0	0	1	0	0	0	inf	up	1	1	no	chr2.3	66346816	66350113	+	3	circRNA	MS.gene00939.t1	MS.gene00939	chr2.3:66346321-66346815|chr2.3:66350113-66356296	F-box/LRR protein [Medicago truncatula]	GO:0004842(ubiquitin-protein transferase activity);GO:0005634(nucleus);GO:0006511(ubiquitin-dependent protein catabolic process)	NA	NA
circRNA50	0	0	0	80.9704	0	0	0	0	0	7	0	0	-inf	down	1	1	no	chr8.1	43769381	43959732	+	1	intergenic	intergenic_circRNA	intergenic_circRNA	chr8.1:43769380-43959732	NA	NA	NA	NA
circRNA253	17.4241	0	0	0	0	0	1	0	0	0	0	0	inf	up	1	1	no	chr3.2	88145315	88145553	+	2	circRNA	MS.gene40730.t1	MS.gene40730	chr3.2:88144758-88145314|chr3.2:88145553-88145986	peptidyl-tRNA hydrolase II (PTH2) family protein [Medicago truncatula]	GO:0009507(chloroplast)	NA	NA
circRNA2	0	0	0	11.5672	0	0	0	0	0	1	0	0	-inf	down	1	1	no	chr2.2	12536536	12537214	-	2	circRNA	MS.gene073080.t1	MS.gene073080	chr2.2:12536309-12536535|chr2.2:12537214-12537296	peptidyl-prolyl cis-trans isomerase CYP71 [Medicago truncatula]	GO:0003755(peptidyl-prolyl cis-trans isomerase activity)	NA	NA
circRNA96	0	48.2579	0	0	0	55.8722	0	4	0	0	0	5	-0.211363	down	1	1	no	chr8.1	17508870	17509310	+	1	circRNA	MS.gene56860.t1	MS.gene56860	chr8.1:17508267-17508869|chr8.1:17509310-17510606	embryo defective 2759 protein, putative [Medicago truncatula]	GO:0000149(SNARE binding);GO:0005484(SNAP receptor activity);GO:0006887(exocytosis);GO:0006906(vesicle fusion);GO:0031201(SNARE complex)	04130(SNARE interactions in vesicular transport)	NA
circRNA18	209.09	0	0	127.239	0	78.221	12	0	0	11	0	7	0.025262	up	1	1	no	32523	46090	56774	-	1	intergenic	intergenic_circRNA	intergenic_circRNA	32523:46089-56774	NA	NA	NA	NA
circRNA226	0	0	0	0	0	0	0	0	0	0	0	0	0	no	1	1	no	chr6.3	16356657	16357280	-	3	circRNA	MS.gene47112.t1		chr6.3:16356361-16356657|chr6.3:16357280-16357677	glucose-6-phosphate 1-dehydrogenase, cytoplasmic isoform X2 [Medicago truncatula]	GO:0004345(glucose-6-phosphate dehydrogenase activity);GO:0005737(cytoplasm);GO:0005829(cytosol);GO:0006006(glucose metabolic process);GO:0006098(pentose-phosphate shunt);GO:0009051(pentose-phosphate shunt, oxidative branch);GO:0009507(chloroplast);GO:0016021(integral component of membrane);GO:0046686(response to cadmium ion);GO:0050661(NADP binding);GO:0055114(oxidation-reduction process)	00030(Pentose phosphate pathway);00480(Glutathione metabolism)	EC:1.1.1.363
circRNA285	0	12.0645	0	0	0	0	0	1	0	0	0	0	inf	up	1	1	no	chr5.4	54217498	54221975	-	5	circRNA	MS.gene88719.t1	MS.gene88719	chr5.4:54216693-54217497|chr5.4:54221975-54222065	ribonuclease E/G-like protein, chloroplastic isoform X1 [Medicago truncatula]	GO:0004540(ribonuclease activity);GO:0005737(cytoplasm);GO:0006364(rRNA processing)	NA	NA
circRNA162	0	0	0	0	0	0	0	0	0	0	0	0	0	no	1	1	no	chr3.3	10730794	10858580	-	1	intergenic	intergenic_circRNA	intergenic_circRNA	chr3.3:10730793-10858580	NA	NA	NA	NA
circRNA304	0	0	15.4623	0	0	0	0	0	1	0	0	0	inf	up	1	1	no	chr8.3	5876381	5876614	+	1	circRNA	MS.gene061231.t1	MS.gene061231	chr8.3:5876300-5876380|chr8.3:5876614-5876705	beta-glucosidase-like SFR2, chloroplastic [Medicago truncatula]	GO:0008422(beta-glucosidase activity);GO:1901657(glycosyl compound metabolic process)	00561(Glycerolipid metabolism)	EC:2.4.1.184
ciRNA127	0	0	15.4623	0	0	0	0	0	1	0	0	0	inf	up	1	1	no	chr1.2	61359512	61359740	+	1	ciRNA	MS.gene70827.t1	MS.gene70827	chr1.2:61359511-61359770	pathogenesis-related protein PR-4 [Medicago truncatula]	GO:0005575(cellular_component);GO:0006952(defense response)	NA	NA
circRNA122	0	0	0	0	0	100.57	0	0	0	0	0	9	-inf	down	1	1	no	chr4.1	16150151	16336627	+	1	intergenic	intergenic_circRNA	intergenic_circRNA	chr4.1:16150150-16336627	NA	NA	NA	NA
circRNA73	0	0	0	0	440.82	0	0	0	0	0	19	0	-inf	down	1	1	no	chr4.2	85162815	85162961	-	1	intergenic	intergenic_circRNA	intergenic_circRNA	chr4.2:85162814-85162961	NA	NA	NA	NA
circRNA179	0	0	0	0	0	0	0	0	0	0	0	0	0	no	1	1	no	chr8.1	33922043	33924394	-	7	circRNA	MS.gene49504.t1	MS.gene49504	chr8.1:33921600-33922042|chr8.1:33924394-33924750	probable leucine-rich repeat receptor-like protein kinase At5g49770 [Medicago truncatula]	GO:0004674(protein serine/threonine kinase activity);GO:0005524(ATP binding);GO:0005576(extracellular region);GO:0006468(protein phosphorylation);GO:0007169(transmembrane receptor protein tyrosine kinase signaling pathway);GO:0016301(kinase activity);GO:0016310(phosphorylation)	NA	NA
circRNA61	0	0	0	0	46.4022	0	0	0	0	0	2	0	-inf	down	1	1	no	chr4.3	7454678	7455048	+	2	circRNA	MS.gene000398.t1	MS.gene000398	chr4.3:7454427-7454677|chr4.3:7455048-7455703	uncharacterized protein LOC11437260 [Medicago truncatula]	GO:0003676(nucleic acid binding);GO:0005634(nucleus);GO:0006281(DNA repair);GO:0008081(phosphoric diester hydrolase activity);GO:0008270(zinc ion binding);GO:0016818(hydrolase activity, acting on acid anhydrides, in phosphorus-containing anhydrides)	NA	NA
circRNA59	0	0	0	0	23.2011	0	0	0	0	0	1	0	-inf	down	1	1	no	chr6.2	3516246	3517189	+	2	circRNA	MS.gene57080.t1	MS.gene57080	chr6.2:3514059-3516245|chr6.2:3517189-3517811	nodulin MtN21/EamA-like transporter family protein [Medicago truncatula]	GO:0005886(plasma membrane);GO:0006810(transport);GO:0022857(transmembrane transporter activity)	NA	NA
ciRNA107	0	12.0645	0	0	0	0	0	1	0	0	0	0	inf	up	1	1	no	chr2.2	48728530	48728698	-	1	ciRNA	MS.gene026070.t1	MS.gene026070	chr2.2:48728503-48728698	beta-galactosidase [Medicago truncatula]	GO:0004565(beta-galactosidase activity);GO:0005618(cell wall);GO:0005773(vacuole)	00052(Galactose metabolism);00600(Sphingolipid metabolism);00531(Glycosaminoglycan degradation);00604(Glycosphingolipid biosynthesis - ganglio series);00511(Other glycan degradation)	EC:3.2.1.23
circRNA118	0	0	0	0	0	22.3489	0	0	0	0	0	2	-inf	down	1	1	no	chr3.1	8970892	8971040	-	1	intergenic	intergenic_circRNA	intergenic_circRNA	chr3.1:8970891-8971040	NA	NA	NA	NA
circRNA27	0	0	0	23.1344	0	0	0	0	0	2	0	0	-inf	down	1	1	no	chr3.1	35920617	36004145	+	1	intergenic	intergenic_circRNA	intergenic_circRNA	chr3.1:35920616-36004145	NA	NA	NA	NA
ciRNA47	0	0	0	0	0	0	0	0	0	0	0	0	0	no	1	1	no	chr3.2	76648651	76648904	+	1	ciRNA	MS.gene81985.t1	MS.gene81985	chr3.2:76648650-76648927	mitochondrial carrier protein MTM1 isoform X1 [Medicago truncatula]	GO:0003735(structural constituent of ribosome);GO:0006412(translation)	NA	NA
circRNA273	0	24.129	0	0	0	0	0	2	0	0	0	0	inf	up	1	1	no	chr6.4	61801973	61802279	-	2	circRNA	MS.gene059563.t1	MS.gene059563	chr6.4:61801700-61801972|chr6.4:61802279-61803087	2-oxoglutarate-Fe(II) type oxidoreductase hxnY isoform X2 [Medicago truncatula]	GO:0051213(dioxygenase activity)	NA	NA
ciRNA73	0	0	0	0	0	0	0	0	0	0	0	0	0	no	1	1	no	chr7.1	22432045	22432153	+	1	ciRNA	MS.gene024182.t1	MS.gene024182	chr7.1:22432044-22432802	uncharacterized protein LOC11438961 [Medicago truncatula]	GO:0004674(protein serine/threonine kinase activity);GO:0005524(ATP binding);GO:0005886(plasma membrane);GO:0006468(protein phosphorylation);GO:0016021(integral component of membrane);GO:0016301(kinase activity)	NA	NA
ciRNA53	0	0	0	0	0	0	0	0	0	0	0	0	0	no	1	1	no	chr5.2	45548696	45548970	-	1	ciRNA	MS.gene042677.t1	MS.gene042677	chr5.2:45548667-45548970	serine/threonine-protein kinase STN7, chloroplastic [Medicago truncatula]	GO:0004672(protein kinase activity)	NA	NA
circRNA185	0	0	0	0	0	0	0	0	0	0	0	0	0	no	1	1	no	chr3.2	79205460	79205943	-	3	circRNA	MS.gene06490.t1	MS.gene06490	chr3.2:79203505-79205459|chr3.2:79205943-79207282	protein ACTIVITY OF BC1 COMPLEX KINASE 8, chloroplastic [Medicago truncatula]	GO:0005215(transporter activity);GO:0005524(ATP binding);GO:0005886(plasma membrane);GO:0006810(transport);GO:0006979(response to oxidative stress);GO:0007623(circadian rhythm);GO:0009507(chloroplast);GO:0009644(response to high light intensity);GO:0009941(chloroplast envelope);GO:0010150(leaf senescence);GO:0016021(integral component of membrane);GO:0016301(kinase activity);GO:0016310(phosphoryl…	04626(Plant-pathogen interaction)	NA
ciRNA4	0	0	0	11.5672	0	0	0	0	0	1	0	0	-inf	down	1	1	no	chr4.2	881510	882031	-	1	ciRNA	MS.gene62643.t1	MS.gene62643	chr4.2:881480-882031	uncharacterized protein LOC11411170 [Medicago truncatula]	GO:0005634(nucleus);GO:0008270(zinc ion binding)	NA	NA
circRNA97	0	0	0	0	0	11.1744	0	0	0	0	0	1	-inf	down	1	1	no	chr8.4	69486542	69487879	-	2	circRNA	MS.gene84753.t1	MS.gene84753	chr8.4:69486198-69486541|chr8.4:69487879-69488231	putative transcription factor WD40-like family [Medicago truncatula]	GO:0007035(vacuolar acidification);GO:0008593(regulation of Notch signaling pathway);GO:0035149(lumen formation, open tracheal system);GO:0043291(RAVE complex);GO:0070072(vacuolar proton-transporting V-type ATPase complex assembly)	NA	NA
ciRNA108	0	12.0645	0	0	0	0	0	1	0	0	0	0	inf	up	1	1	no	chr2.4	45699168	45699494	-	1	ciRNA	MS.gene85324.t1	MS.gene85324	chr2.4:45699123-45699494	putative translocation protein Sec63 [Medicago truncatula]	GO:0005739(mitochondrion);GO:0005783(endoplasmic reticulum);GO:0005794(Golgi apparatus);GO:0005829(cytosol);GO:0005886(plasma membrane);GO:0006457(protein folding);GO:0009507(chloroplast);GO:0016021(integral component of membrane);GO:0030176(integral component of endoplasmic reticulum membrane);GO:0031204(posttranslational protein targeting to membrane, translocation)	03060(Protein export);04141(Protein processing in endoplasmic reticulum)	NA
ciRNA29	0	0	0	0	0	22.3489	0	0	0	0	0	2	-inf	down	1	1	no	chr6.2	14383976	14384402	+	1	ciRNA	MS.gene074249.t1	MS.gene074249	chr6.2:14383975-14384427	RecName: Full=Ribulose bisphosphate carboxylase small chain, chloroplastic; Short=RuBisCO small subunit; Flags: Precursor	GO:0004497(monooxygenase activity);GO:0005507(copper ion binding);GO:0009409(response to cold);GO:0009507(chloroplast);GO:0009535(chloroplast thylakoid membrane);GO:0009536(plastid);GO:0009570(chloroplast stroma);GO:0009573(chloroplast ribulose bisphosphate carboxylase complex);GO:0009579(thylakoid);GO:0009637(response to blue light);GO:0009853(photorespiration);GO:0009941(chloroplast envelope);G…	00630(Glyoxylate and dicarboxylate metabolism);00710(Carbon fixation in photosynthetic organisms)	EC:4.1.1.39
circRNA279	0	12.0645	0	0	0	0	0	1	0	0	0	0	inf	up	1	1	no	chr4.3	25870483	25871269	-	4	circRNA	MS.gene47512.t1	MS.gene47512	chr4.3:25869133-25870482|chr4.3:25871269-25872738	something about silencing protein 10 isoform X1 [Medicago truncatula]	GO:0000462(maturation of SSU-rRNA from tricistronic rRNA transcript (SSU-rRNA, 5.8S rRNA, LSU-rRNA));GO:0005730(nucleolus);GO:0032040(small-subunit processome)	NA	NA
circRNA212	0	0	0	0	0	0	0	0	0	0	0	0	0	no	1	1	no	chr1.3	19108977	19112186	+	4	circRNA	MS.gene061686.t1		chr1.3:19108488-19108977|chr1.3:19112190-19113998	cold-regulated 413 plasma membrane protein 1 [Medicago truncatula]	GO:0003674(molecular_function);GO:0005739(mitochondrion);GO:0005773(vacuole);GO:0005886(plasma membrane);GO:0009631(cold acclimation);GO:0009737(response to abscisic acid);GO:0016021(integral component of membrane);GO:0042631(cellular response to water deprivation)	04144(Endocytosis)	NA
circRNA81	0	48.2579	0	0	46.4022	0	0	4	0	0	2	0	0.0565749	up	1	1	no	chr7.2	44592777	44687901	-	1	intergenic	intergenic_circRNA	intergenic_circRNA	chr7.2:44592776-44687901	NA	NA	NA	NA
circRNA195	0	0	0	0	0	0	0	0	0	0	0	0	0	no	1	1	no	chr3.3	52402658	52487516	-	1	intergenic	intergenic_circRNA	intergenic_circRNA	chr3.3:52402657-52487516	NA	NA	NA	NA
circRNA174	0	0	0	0	0	0	0	0	0	0	0	0	0	no	1	1	no	chr7.2	68490054	68593838	-	1	intergenic	intergenic_circRNA	intergenic_circRNA	chr7.2:68490053-68593838	NA	NA	NA	NA
circRNA108	0	0	0	0	0	11.1744	0	0	0	0	0	1	-inf	down	1	1	no	chr1.1	24109913	24110568	-	2	circRNA	MS.gene33301.t1	MS.gene33301	chr1.1:24109618-24109912|chr1.1:24110568-24110860	glucomannan 4-beta-mannosyltransferase 9 [Medicago truncatula]	GO:0000139(Golgi membrane);GO:0005794(Golgi apparatus);GO:0009294(DNA mediated transformation);GO:0009617(response to bacterium);GO:0016021(integral component of membrane);GO:0016757(transferase activity, transferring glycosyl groups);GO:0047259(glucomannan 4-beta-mannosyltransferase activity);GO:0051753(mannan synthase activity);GO:0071555(cell wall organization)	NA	NA
circRNA87	0	0	0	0	69.6032	0	0	0	0	0	3	0	-inf	down	1	1	no	chr2.1	39684547	39684707	+	1	circRNA	MS.gene97272.t1		chr2.1:39685003-39685123	protein TSS isoform X1 [Medicago truncatula]	GO:0005634(nucleus);GO:0005737(cytoplasm);GO:0005829(cytosol)	NA	NA
ciRNA9	0	0	0	11.5672	0	0	0	0	0	1	0	0	-inf	down	1	1	no	chr1.1	50309177	50309355	-	1	ciRNA	MS.gene068523.t1	MS.gene068523	chr1.1:50309154-50309355	arginine biosynthesis bifunctional protein ArgJ, chloroplastic [Medicago truncatula]	GO:0004042(acetyl-CoA:L-glutamate N-acetyltransferase activity);GO:0004358(glutamate N-acetyltransferase activity);GO:0006526(arginine biosynthetic process);GO:0006592(ornithine biosynthetic process)	00220(Arginine biosynthesis)	EC:2.3.1.1
circRNA196	0	0	0	0	0	0	0	0	0	0	0	0	0	no	1	1	no	chr3.4	14231835	14259270	+	1	intergenic	intergenic_circRNA	intergenic_circRNA	chr3.4:14231834-14259270	NA	NA	NA	NA
circRNA243	0	0	0	0	0	0	0	0	0	0	0	0	0	no	1	1	no	chr6.3	11364219	11490933	+	1	intergenic	intergenic_circRNA	intergenic_circRNA	chr6.3:11364218-11490933	NA	NA	NA	NA
circRNA121	0	0	0	0	0	78.221	0	0	0	0	0	7	-inf	down	1	1	no	chr3.4	15941220	15987230	-	1	intergenic	intergenic_circRNA	intergenic_circRNA	chr3.4:15941219-15987230	NA	NA	NA	NA
circRNA110	0	0	0	0	0	11.1744	0	0	0	0	0	1	-inf	down	1	1	no	chr7.4	14528483	14539256	+	15	circRNA	MS.gene04710.t1	MS.gene04710	chr7.4:14527360-14528482|chr7.4:14539256-14539871	mRNA capping enzyme, putative [Medicago truncatula]	GO:0004484(mRNA guanylyltransferase activity);GO:0005634(nucleus);GO:0006370(7-methylguanosine mRNA capping);GO:0006397(mRNA processing);GO:0009506(plasmodesma)	03015(mRNA surveillance pathway)	EC:2.7.7.50
ciRNA102	17.4241	0	0	0	0	0	1	0	0	0	0	0	inf	up	1	1	no	chr7.3	17400881	17401102	+	1	ciRNA	MS.gene04628.t1	MS.gene04628	chr7.3:17400880-17401102	actin-3 [Medicago truncatula]	GO:0005200(structural constituent of cytoskeleton);GO:0005515(protein binding);GO:0005524(ATP binding);GO:0005618(cell wall);GO:0005730(nucleolus);GO:0005737(cytoplasm);GO:0005739(mitochondrion);GO:0005829(cytosol);GO:0005856(cytoskeleton);GO:0005886(plasma membrane);GO:0007010(cytoskeleton organization);GO:0009416(response to light stimulus);GO:0009506(plasmodesma);GO:0009570(chloroplast stroma)…	NA	NA
ciRNA18	0	0	0	0	46.4022	0	0	0	0	0	2	0	-inf	down	1	1	no	chr2.2	49346734	49346914	+	1	ciRNA	MS.gene55100.t1	MS.gene55100	chr2.2:49346733-49346937	protein TRANSPARENT TESTA 9 isoform X3 [Medicago truncatula]	GO:0001708(cell fate specification);GO:0003674(molecular_function);GO:0005794(Golgi apparatus);GO:0009718(anthocyanin-containing compound biosynthetic process);GO:0016192(vesicle-mediated transport);GO:0019898(extrinsic component of membrane);GO:0044090(positive regulation of vacuole organization);GO:1903415(flavonoid transport from endoplasmic reticulum to plant-type vacuole)	NA	NA
ciRNA35	0	0	0	0	0	22.3489	0	0	0	0	0	2	-inf	down	1	1	no	chr1.4	33526123	33526840	-	1	ciRNA	MS.gene43333.t1	MS.gene43333	chr1.4:33526096-33526840	uricase (Nod-35) [Medicago sativa]	GO:0004846(urate oxidase activity);GO:0005739(mitochondrion);GO:0005777(peroxisome);GO:0006144(purine nucleobase metabolic process);GO:0007031(peroxisome organization);GO:0019628(urate catabolic process);GO:0055114(oxidation-reduction process)	00230(Purine metabolism);00232(Caffeine metabolism)	EC:1.7.3.3
circRNA198	0	0	0	0	0	0	0	0	0	0	0	0	0	no	1	1	no	chr4.2	85233983	85303739	-	1	intergenic	intergenic_circRNA	intergenic_circRNA	chr4.2:85233982-85303739	NA	NA	NA	NA
ciRNA92	0	0	0	0	0	0	0	0	0	0	0	0	0	no	1	1	no	chr1.3	15626705	15626860	+	1	ciRNA	MS.gene93170.t1	MS.gene93170	chr1.3:15626704-15627007	putative L-type lectin-domain containing receptor kinase V.2 [Medicago truncatula]	GO:0005886(plasma membrane);GO:0016301(kinase activity);GO:0016310(phosphorylation)	NA	NA
circRNA42	0	0	0	34.7016	0	0	0	0	0	3	0	0	-inf	down	1	1	no	chr6.2	86961664	87094578	+	1	intergenic	intergenic_circRNA	intergenic_circRNA	chr6.2:86961663-87094578	NA	NA	NA	NA
circRNA103	0	0	0	0	0	11.1744	0	0	0	0	0	1	-inf	down	1	1	no	33145	11037	12327	-	2	circRNA	MS.gene057598.t1	MS.gene057598	33145:10844-11036|33145:12327-13315	protein NRDE2 homolog isoform X2 [Medicago truncatula]	GO:0003674(molecular_function);GO:0005634(nucleus);GO:0006396(RNA processing)	NA	NA
circRNA135	0	0	0	0	0	0	0	0	0	0	0	0	0	no	1	1	no	chr6.3	21171279	21171762	+	2	circRNA	MS.gene042582.t1	MS.gene042582	chr6.3:21168991-21171278|chr6.3:21171762-21172585	uncharacterized protein LOC25495874 [Medicago truncatula]	GO:0004536(deoxyribonuclease activity);GO:0005634(nucleus);GO:0016788(hydrolase activity, acting on ester bonds)	NA	NA
circRNA215	0	0	0	0	0	0	0	0	0	0	0	0	0	no	1	1	no	chr2.4	5281613	5283558	-	3	circRNA	MS.gene85604.t1	MS.gene85604	chr2.4:5281417-5281612|chr2.4:5283558-5284591	hypothetical protein MtrunA17_Chr2g0329331 [Medicago truncatula]	NA	NA	NA
ciRNA21	0	0	0	0	46.4022	0	0	0	0	0	2	0	-inf	down	1	1	no	chr3.1	45166721	45167246	+	1	ciRNA	MS.gene04146.t1	MS.gene04146	chr3.1:45166720-45167266	peptidyl-prolyl cis-trans isomerase FKBP16-1, chloroplastic [Medicago truncatula]	GO:0003755(peptidyl-prolyl cis-trans isomerase activity);GO:0005528(FK506 binding);GO:0005789(endoplasmic reticulum membrane);GO:0061077(chaperone-mediated protein folding)	NA	NA
ciRNA130	0	0	15.4623	0	0	0	0	0	1	0	0	0	inf	up	1	1	no	chr5.3	20054170	20054588	-	1	ciRNA	MS.gene069168.t1	MS.gene069168	chr5.3:20054145-20054588	oligopeptidase A [Medicago truncatula]	GO:0004222(metalloendopeptidase activity);GO:0006518(peptide metabolic process);GO:0009507(chloroplast)	NA	NA
ciRNA122	0	0	46.387	0	0	0	0	0	3	0	0	0	inf	up	1	1	no	chr4.1	13878815	13878999	+	1	ciRNA	MS.gene53384.t1	MS.gene53384	chr4.1:13878814-13879121	mitochondrial dicarboxylate/tricarboxylate transporter DTC [Medicago truncatula]	GO:0003735(structural constituent of ribosome);GO:0006412(translation)	NA	NA
ciRNA3	0	0	0	11.5672	0	0	0	0	0	1	0	0	-inf	down	1	1	no	chr2.4	50723482	50723752	+	1	ciRNA	MS.gene21963.t1	MS.gene21963	chr2.4:50723481-50723876	uncharacterized protein LOC11440251 isoform X1 [Medicago truncatula]	GO:0005886(plasma membrane);GO:0016301(kinase activity)	NA	NA
circRNA292	0	108.58	0	0	0	0	0	9	0	0	0	0	inf	up	1	1	no	chr6.3	76203218	76382419	-	1	intergenic	intergenic_circRNA	intergenic_circRNA	chr6.3:76203217-76382419	NA	NA	NA	NA
circRNA130	0	0	0	0	0	100.57	0	0	0	0	0	9	-inf	down	1	1	no	chr7.3	35900276	36078896	+	1	intergenic	intergenic_circRNA	intergenic_circRNA	chr7.3:35900275-36078896	NA	NA	NA	NA
circRNA266	34.8483	0	0	0	0	0	2	0	0	0	0	0	inf	up	1	1	no	chr5.1	1427356	1484867	+	1	intergenic	intergenic_circRNA	intergenic_circRNA	chr5.1:1427355-1484867	NA	NA	NA	NA
circRNA249	17.4241	0	0	0	0	0	1	0	0	0	0	0	inf	up	1	1	no	chr2.3	7352004	7353128	+	5	circRNA	MS.gene058933.t1	MS.gene058933	chr2.3:7350347-7352003|chr2.3:7353128-7353399	protein ENHANCED DISEASE RESISTANCE 2 isoform X1 [Medicago truncatula]	GO:0005634(nucleus);GO:0005886(plasma membrane);GO:0007165(signal transduction);GO:0035091(phosphatidylinositol binding)	NA	NA
circRNA281	0	24.129	0	0	0	0	0	2	0	0	0	0	inf	up	1	1	no	chr1.2	50532943	50534067	-	3	circRNA	MS.gene30886.t1	MS.gene30886	chr1.2:50532833-50532942|chr1.2:50534067-50534145	hypothetical protein TSUD_176340, partial [Trifolium subterraneum]	GO:0004364(glutathione transferase activity);GO:0005737(cytoplasm);GO:0006749(glutathione metabolic process);GO:0010731(protein glutathionylation)	00480(Glutathione metabolism)	EC:2.5.1.18
ciRNA91	0	0	0	0	0	0	0	0	0	0	0	0	0	no	1	1	no	chr1.2	36054960	36055567	+	1	ciRNA	MS.gene040766.t1	MS.gene040766	chr1.2:36054959-36055586	structural maintenance of chromosomes protein 3 [Medicago truncatula]	GO:0000775(chromosome, centromeric region);GO:0000785(chromatin);GO:0003682(chromatin binding);GO:0005524(ATP binding);GO:0005634(nucleus);GO:0005737(cytoplasm);GO:0005819(spindle);GO:0006281(DNA repair);GO:0007059(chromosome segregation);GO:0007062(sister chromatid cohesion);GO:0008278(cohesin complex);GO:0009506(plasmodesma);GO:0016363(nuclear matrix);GO:0051301(cell division);GO:0051321(meioti…	NA	NA
ciRNA38	0	0	0	0	0	33.5233	0	0	0	0	0	3	-inf	down	1	1	no	chr7.4	68763746	68764897	+	1	ciRNA	MS.gene035102.t1		chr7.4:68763745-68764897	hypothetical protein TanjilG_13611 [Lupinus angustifolius]	GO:0005739(mitochondrion);GO:0005777(peroxisome);GO:0005829(cytosol);GO:0006790(sulfur compound metabolic process);GO:0008482(sulfite oxidase activity);GO:0009507(chloroplast);GO:0010477(response to sulfur dioxide);GO:0015994(chlorophyll metabolic process);GO:0016491(oxidoreductase activity);GO:0030151(molybdenum ion binding);GO:0042128(nitrate assimilation);GO:0055114(oxidation-reduction process)	00920(Sulfur metabolism)	EC:1.8.3.1
circRNA274	0	12.0645	0	0	0	0	0	1	0	0	0	0	inf	up	1	1	no	chr8.2	30960273	30960916	-	2	circRNA	MS.gene066504.t1	MS.gene066504	chr8.2:30960194-30960272|chr8.2:30960916-30961001	uncharacterized protein LOC25501589 [Medicago truncatula]	GO:0005096(GTPase activator activity);GO:0005737(cytoplasm);GO:0005886(plasma membrane);GO:0017137(Rab GTPase binding);GO:0017157(regulation of exocytosis);GO:0019905(syntaxin binding)	NA	NA
circRNA58	0	0	0	0	46.4022	0	0	0	0	0	2	0	-inf	down	1	1	no	chr2.4	50898917	50899869	-	3	circRNA	MS.gene21959.t1	MS.gene21959	chr2.4:50898828-50898916|chr2.4:50899869-50899959	beta-galactosidase [Medicago truncatula]	GO:0004565(beta-galactosidase activity);GO:0005618(cell wall);GO:0005773(vacuole)	00052(Galactose metabolism);00600(Sphingolipid metabolism);00531(Glycosaminoglycan degradation);00604(Glycosphingolipid biosynthesis - ganglio series);00511(Other glycan degradation)	EC:3.2.1.23
circRNA114	0	0	0	0	0	100.57	0	0	0	0	0	9	-inf	down	1	1	no	chr1.4	50435625	50466038	-	1	intergenic	intergenic_circRNA	intergenic_circRNA	chr1.4:50435624-50466038	NA	NA	NA	NA
ciRNA66	0	0	0	0	0	0	0	0	0	0	0	0	0	no	1	1	no	chr4.2	42999340	42999611	+	1	ciRNA	MS.gene004142.t1	MS.gene004142	chr4.2:42999339-42999642	ascorbate peroxidase isoform 2 [Medicago sativa]	GO:0000302(response to reactive oxygen species);GO:0004130(cytochrome-c peroxidase activity);GO:0004601(peroxidase activity);GO:0005618(cell wall);GO:0005737(cytoplasm);GO:0005794(Golgi apparatus);GO:0005829(cytosol);GO:0005886(plasma membrane);GO:0006979(response to oxidative stress);GO:0009408(response to heat);GO:0009506(plasmodesma);GO:0009507(chloroplast);GO:0009570(chloroplast stroma);GO:00…	00053(Ascorbate and aldarate metabolism);00480(Glutathione metabolism)	EC:1.11.1.11
ciRNA96	0	0	0	0	0	0	0	0	0	0	0	0	0	no	1	1	no	chr5.3	72579768	72579908	-	1	ciRNA	MS.gene47698.t1	MS.gene47698	chr5.3:72577168-72579908	probable magnesium transporter NIPA4 isoform X2 [Medicago truncatula]	GO:0005769(early endosome);GO:0005886(plasma membrane);GO:0008150(biological_process);GO:0015095(magnesium ion transmembrane transporter activity);GO:0016021(integral component of membrane)	NA	NA
circRNA227	0	0	0	0	0	0	0	0	0	0	0	0	0	no	1	1	no	chr3.2	75033664	75033932	-	2	circRNA	MS.gene045070.t1		chr3.2:75032556-75033571	photosystem II 22 kDa protein, chloroplastic [Medicago truncatula]	GO:0009507(chloroplast);GO:0009517(PSII associated light-harvesting complex II);GO:0009523(photosystem II);GO:0009534(chloroplast thylakoid);GO:0009535(chloroplast thylakoid membrane);GO:0009579(thylakoid);GO:0010027(thylakoid membrane organization);GO:0010196(nonphotochemical quenching);GO:0015979(photosynthesis);GO:0016020(membrane);GO:0016021(integral component of membrane);GO:0016168(chloroph…	00195(Photosynthesis)	NA
circRNA257	17.4241	0	0	0	0	0	1	0	0	0	0	0	inf	up	1	1	no	chr5.1	23673799	23674160	-	2	circRNA	MS.gene86206.t1	MS.gene86206	chr5.1:23672885-23673798|chr5.1:23674160-23674551	glutamate--glyoxylate aminotransferase 2 [Medicago truncatula]	GO:0004021(L-alanine:2-oxoglutarate aminotransferase activity);GO:0005737(cytoplasm);GO:0005777(peroxisome);GO:0005829(cytosol);GO:0008453(alanine-glyoxylate transaminase activity);GO:0009058(biosynthetic process);GO:0009507(chloroplast);GO:0009570(chloroplast stroma);GO:0009853(photorespiration);GO:0030170(pyridoxal phosphate binding);GO:0042853(L-alanine catabolic process);GO:0047958(glycine:2-…	00630(Glyoxylate and dicarboxylate metabolism);00710(Carbon fixation in photosynthetic organisms);00250(Alanine, aspartate and glutamate metabolism);00260(Glycine, serine and threonine metabolism);00220(Arginine biosynthesis)	EC:2.6.1.2
circRNA156	0	0	0	0	0	0	0	0	0	0	0	0	0	no	1	1	no	chr2.1	24530978	24620740	+	1	intergenic	intergenic_circRNA	intergenic_circRNA	chr2.1:24530977-24620740	NA	NA	NA	NA
ciRNA78	0	0	0	0	0	0	0	0	0	0	0	0	0	no	1	1	no	chr5.3	60563027	60563334	-	1	ciRNA	MS.gene009655.t1	MS.gene009655	chr5.3:60563006-60563334	ribose-phosphate pyrophosphokinase 4 isoform X1 [Medicago truncatula]	GO:0004749(ribose phosphate diphosphokinase activity);GO:0005524(ATP binding);GO:0005737(cytoplasm);GO:0005829(cytosol);GO:0005886(plasma membrane);GO:0009116(nucleoside metabolic process);GO:0009165(nucleotide biosynthetic process);GO:0009506(plasmodesma);GO:0016301(kinase activity);GO:0016310(phosphorylation);GO:0046872(metal ion binding)	NA	NA
circRNA184	0	0	0	0	0	0	0	0	0	0	0	0	0	no	1	1	no	chr4.3	46646887	46647871	-	2	circRNA	MS.gene66785.t1	MS.gene66785	chr4.3:46646729-46646886|chr4.3:46647871-46648991	protein HIRA isoform X1 [Medicago truncatula]	GO:0005515(protein binding)	NA	NA
circRNA276	0	12.0645	0	0	0	0	0	1	0	0	0	0	inf	up	1	1	no	chr4.4	33778731	33780281	-	5	circRNA	MS.gene052333.t1	MS.gene052333	chr4.4:33778177-33778730|chr4.4:33780281-33780593	uncharacterized protein LOC11441638 [Medicago truncatula]	NA	NA	NA
ciRNA113	0	72.3869	0	0	0	0	0	6	0	0	0	0	inf	up	1	1	no	chr1.3	57480474	57480742	-	1	ciRNA	MS.gene44017.t1	MS.gene44017	chr1.3:57480446-57480742	uncharacterized protein LOC11412057 isoform X1 [Medicago truncatula]	GO:0003674(molecular_function);GO:0005634(nucleus);GO:0008150(biological_process)	00190(Oxidative phosphorylation)	NA
circRNA204	0	0	0	0	0	0	0	0	0	0	0	0	0	no	1	1	no	chr6.3	59155590	59215179	+	1	intergenic	intergenic_circRNA	intergenic_circRNA	chr6.3:59155589-59215179	NA	NA	NA	NA
circRNA170	69.6965	0	0	0	0	0	4	0	0	0	0	0	inf	up	1	1	no	chr6.3	29782655	29784625	+	1	intergenic	intergenic_circRNA	intergenic_circRNA	chr6.3:29782654-29784625	NA	NA	NA	NA
circRNA23	0	0	0	57.836	0	0	0	0	0	5	0	0	-inf	down	1	1	no	chr1.4	50466174	50577160	-	1	intergenic	intergenic_circRNA	intergenic_circRNA	chr1.4:50466173-50577160	NA	NA	NA	NA
circRNA241	0	0	0	0	0	0	0	0	0	0	0	0	0	no	1	1	no	chr5.4	13461139	13461799	-	1	intergenic	intergenic_circRNA	intergenic_circRNA	chr5.4:13461138-13461799	NA	NA	NA	NA
circRNA298	0	48.2579	0	0	0	0	0	4	0	0	0	0	inf	up	1	1	no	chr8.4	49708142	49708286	+	1	intergenic	intergenic_circRNA	intergenic_circRNA	chr8.4:49708141-49708286	NA	NA	NA	NA
circRNA166	0	132.709	0	0	0	0	0	11	0	0	0	0	inf	up	1	1	no	chr4.2	85106553	85164480	-	1	intergenic	intergenic_circRNA	intergenic_circRNA	chr4.2:85106552-85164480	NA	NA	NA	NA
circRNA191	0	0	0	0	0	0	0	0	0	0	0	0	0	no	1	1	no	chr1.4	50529631	50577160	-	1	intergenic	intergenic_circRNA	intergenic_circRNA	chr1.4:50529630-50577160	NA	NA	NA	NA
circRNA11	17.4241	36.1935	46.387	69.4032	0	33.5233	1	3	3	6	0	3	-0.0415482	down	1	1	no	chr3.2	93074291	93074580	-	2	circRNA	MS.gene68740.t1	MS.gene68740	chr3.2:93074219-93074290|chr3.2:93074580-93074654	60S ribosomal protein L5-2 [Medicago truncatula]	GO:0000027(ribosomal large subunit assembly);GO:0003735(structural constituent of ribosome);GO:0006412(translation);GO:0008097(5S rRNA binding);GO:0022625(cytosolic large ribosomal subunit)	03010(Ribosome)	NA
circRNA289	0	168.903	0	0	0	0	0	14	0	0	0	0	inf	up	1	1	no	chr3.4	59973393	60038296	-	1	intergenic	intergenic_circRNA	intergenic_circRNA	chr3.4:59973392-60038296	NA	NA	NA	NA
ciRNA1	0	0	0	11.5672	0	0	0	0	0	1	0	0	-inf	down	1	1	no	chr2.1	19702231	19702801	+	1	ciRNA	MS.gene90134.t1	MS.gene90134	chr2.1:19702230-19702831	chlorophyll a-b binding protein 13, chloroplastic [Medicago truncatula]	GO:0009416(response to light stimulus);GO:0009535(chloroplast thylakoid membrane);GO:0009768(photosynthesis, light harvesting in photosystem I);GO:0009941(chloroplast envelope);GO:0010287(plastoglobule);GO:0016168(chlorophyll binding);GO:0031409(pigment binding)	00196(Photosynthesis - antenna proteins)	NA
ciRNA116	0	12.0645	0	0	0	0	0	1	0	0	0	0	inf	up	1	1	no	chr7.1	15760058	15760338	+	1	ciRNA	MS.gene014124.t1	MS.gene014124	chr7.1:15760057-15760364	enhanced ethylene response protein 5 [Medicago truncatula]	GO:0000502(proteasome complex);GO:0000973(posttranscriptional tethering of RNA polymerase II gene DNA at nuclear periphery);GO:0003690(double-stranded DNA binding);GO:0003723(RNA binding);GO:0005515(protein binding);GO:0005634(nucleus);GO:0005643(nuclear pore);GO:0005739(mitochondrion);GO:0006368(transcription elongation from RNA polymerase II promoter);GO:0009723(response to ethylene);GO:0009873…	NA	NA
circRNA265	69.6965	0	0	0	0	0	4	0	0	0	0	0	inf	up	1	1	no	chr4.1	79121029	79131477	+	1	intergenic	intergenic_circRNA	intergenic_circRNA	chr4.1:79121028-79131477	NA	NA	NA	NA
circRNA290	0	24.129	0	0	0	0	0	2	0	0	0	0	inf	up	1	1	no	chr4.1	63972026	64018653	-	1	intergenic	intergenic_circRNA	intergenic_circRNA	chr4.1:63972025-64018653	NA	NA	NA	NA
circRNA201	0	0	0	0	0	0	0	0	0	0	0	0	0	no	1	1	no	chr6.3	29705180	29784625	+	1	intergenic	intergenic_circRNA	intergenic_circRNA	chr6.3:29705179-29784625	NA	NA	NA	NA
circRNA180	0	0	15.4623	0	0	0	0	0	1	0	0	0	inf	up	1	1	no	chr8.4	63830524	63830829	-	2	circRNA	MS.gene36880.t1	MS.gene36880	chr8.4:63830203-63830523|chr8.4:63830829-63831277	Ara4-interacting protein [Medicago truncatula]	GO:0004518(nuclease activity);GO:0004520(endodeoxyribonuclease activity);GO:0004521(endoribonuclease activity);GO:0005634(nucleus);GO:0005737(cytoplasm);GO:0005886(plasma membrane);GO:0006308(DNA catabolic process);GO:0006401(RNA catabolic process)	NA	NA
ciRNA74	0	0	0	0	0	0	0	0	0	0	0	0	0	no	1	1	no	chr7.2	22160284	22160538	-	1	ciRNA	MS.gene41725.t1	MS.gene41725	chr7.2:22160256-22160538	NADP-specific glutamate dehydrogenase [Medicago truncatula]	GO:0004353(glutamate dehydrogenase [NAD(P)+] activity);GO:0005507(copper ion binding);GO:0005524(ATP binding);GO:0005739(mitochondrion);GO:0006520(cellular amino acid metabolic process);GO:0006807(nitrogen compound metabolic process);GO:0008270(zinc ion binding);GO:0009646(response to absence of light);GO:0009651(response to salt stress);GO:0016491(oxidoreductase activity);GO:0046686(response to …	00910(Nitrogen metabolism);00250(Alanine, aspartate and glutamate metabolism);00220(Arginine biosynthesis);00471(D-Glutamine and D-glutamate metabolism)	EC:1.4.1.3
circRNA68	0	0	0	0	69.6032	0	0	0	0	0	3	0	-inf	down	1	1	no	chr3.1	35764322	35890765	+	1	intergenic	intergenic_circRNA	intergenic_circRNA	chr3.1:35764321-35890765	NA	NA	NA	NA
circRNA86	0	0	0	0	69.6032	0	0	0	0	0	3	0	-inf	down	1	1	no	chr8.2	52184632	52184835	-	1	intergenic	intergenic_circRNA	intergenic_circRNA	chr8.2:52184631-52184835	NA	NA	NA	NA
circRNA145	0	0	0	0	0	0	0	0	0	0	0	0	0	no	1	1	no	chr1.1	55042393	55042584	+	1	circRNA	MS.gene004704.t1	MS.gene004704	chr1.1:55042183-55042392|chr1.1:55042584-55042746	RRP12-like protein isoform X1 [Medicago truncatula]	GO:0005634(nucleus);GO:0008150(biological_process)	NA	NA
circRNA139	0	0	0	0	0	0	0	0	0	0	0	0	0	no	1	1	no	chr1.4	23323755	23325684	-	2	circRNA	MS.gene88584.t1	MS.gene88584	chr1.4:23323461-23323754|chr1.4:23325684-23326084	AUGMIN subunit 3 [Medicago truncatula]	GO:0003674(molecular_function);GO:0005634(nucleus);GO:0005813(centrosome);GO:0005819(spindle);GO:0005874(microtubule);GO:0007098(centrosome cycle);GO:0009524(phragmoplast);GO:0051225(spindle assembly);GO:0051301(cell division);GO:0070652(HAUS complex);GO:0080175(phragmoplast microtubule organization)	NA	NA
ciRNA87	0	0	0	0	0	0	0	0	0	0	0	0	0	no	1	1	no	chr3.2	32417630	32418099	+	1	ciRNA	MS.gene53414.t1	MS.gene53414	chr3.2:32417629-32418125	hydroxymethylglutaryl-CoA lyase [Medicago truncatula]	GO:0004419(hydroxymethylglutaryl-CoA lyase activity);GO:0005739(mitochondrion);GO:0005759(mitochondrial matrix);GO:0006551(leucine metabolic process);GO:0006552(leucine catabolic process);GO:0046951(ketone body biosynthetic process)	00650(Butanoate metabolism);00072(Synthesis and degradation of ketone bodies);00280(Valine, leucine and isoleucine degradation);04146(Peroxisome)	EC:4.1.3.4
circRNA100	0	0	0	0	0	22.3489	0	0	0	0	0	2	-inf	down	1	1	no	chr4.2	35111243	35111592	+	2	circRNA	MS.gene063013.t1	MS.gene063013	chr4.2:35110844-35111242|chr4.2:35111592-35111774	E3 ubiquitin-protein ligase UPL3 [Medicago truncatula]	GO:0004842(ubiquitin-protein transferase activity);GO:0005634(nucleus);GO:0005737(cytoplasm)	04120(Ubiquitin mediated proteolysis)	EC:2.3.2.26
ciRNA11	0	12.0645	0	11.5672	0	0	0	1	0	1	0	0	0.0607261	up	1	1	no	10913	45164	45541	+	1	ciRNA	MS.gene21116.t1	MS.gene21116	10913:45163-45610	peptidyl-prolyl cis-trans isomerase, chloroplastic [Medicago truncatula]	GO:0003755(peptidyl-prolyl cis-trans isomerase activity)	NA	NA
circRNA188	0	0	0	0	0	0	0	0	0	0	0	0	0	no	1	1	no	chr5.4	16754377	16754646	-	1	circRNA	MS.gene83688.t1	MS.gene83688	chr5.4:16746302-16754376|chr5.4:16754646-16755417	long-chain-alcohol oxidase FAO4A [Medicago truncatula]	GO:0046577(long-chain-alcohol oxidase activity)	NA	NA
ciRNA12	0	0	0	11.5672	0	0	0	0	0	1	0	0	-inf	down	1	1	no	chr5.2	27088840	27089101	-	1	ciRNA	MS.gene79015.t1	MS.gene79015	chr5.2:27088807-27089101	pyruvate dehydrogenase E1 component subunit alpha, mitochondrial [Medicago truncatula]	GO:0004739(pyruvate dehydrogenase (acetyl-transferring) activity);GO:0005634(nucleus);GO:0005739(mitochondrion);GO:0005759(mitochondrial matrix);GO:0005829(cytosol);GO:0006086(acetyl-CoA biosynthetic process from pyruvate);GO:0006096(glycolytic process);GO:0043231(intracellular membrane-bounded organelle);GO:0046686(response to cadmium ion);GO:0055114(oxidation-reduction process)	00010(Glycolysis / Gluconeogenesis);00020(Citrate cycle (TCA cycle));00620(Pyruvate metabolism)	EC:1.2.4.1
circRNA33	0	0	0	34.7016	0	0	0	0	0	3	0	0	-inf	down	1	1	no	chr4.1	76813493	76820555	-	1	intergenic	intergenic_circRNA	intergenic_circRNA	chr4.1:76813492-76820555	NA	NA	NA	NA
ciRNA50	0	0	0	0	0	0	0	0	0	0	0	0	0	no	1	1	no	chr1.3	66518284	66518624	-	1	ciRNA	MS.gene005991.t1	MS.gene005991	chr1.3:66518256-66518624	uncharacterized protein LOC11415231 [Medicago truncatula]	GO:0005634(nucleus);GO:0016021(integral component of membrane);GO:0016301(kinase activity);GO:0016310(phosphorylation)	NA	NA
circRNA237	0	0	0	0	0	0	0	0	0	0	0	0	0	no	1	1	no	chr4.2	85160281	85233542	-	1	intergenic	intergenic_circRNA	intergenic_circRNA	chr4.2:85160280-85233542	NA	NA	NA	NA
ciRNA22	0	0	0	0	23.2011	0	0	0	0	0	1	0	-inf	down	1	1	no	chr1.2	67282615	67283062	-	1	ciRNA	MS.gene005674.t1	MS.gene005674	chr1.2:67282575-67283062	uncharacterized protein LOC25484804 [Medicago truncatula]	GO:0003729(mRNA binding);GO:0006402(mRNA catabolic process);GO:0010228(vegetative to reproductive phase transition of meristem);GO:0032451(demethylase activity);GO:0080167(response to karrikin);GO:1990931(RNA N6-methyladenosine dioxygenase activity)	NA	NA
circRNA321	0	0	77.3117	0	0	0	0	0	5	0	0	0	inf	up	1	1	no	chr7.1	18391836	18424998	-	1	intergenic	intergenic_circRNA	intergenic_circRNA	chr7.1:18391835-18424998	NA	NA	NA	NA
ciRNA56	0	0	0	0	0	0	0	0	0	0	0	0	0	no	1	1	no	chr5.1	54263946	54264430	+	1	ciRNA	MS.gene43767.t1	MS.gene43767	chr5.1:54263945-54264458	ATP-dependent zinc metalloprotease FTSH 9, chloroplastic [Medicago truncatula]	GO:0004176(ATP-dependent peptidase activity);GO:0005739(mitochondrion);GO:0006508(proteolysis);GO:0008237(metallopeptidase activity);GO:0009941(chloroplast envelope)	NA	NA
circRNA235	0	0	0	0	0	0	0	0	0	0	0	0	0	no	1	1	no	chr4.1	76655277	76696105	-	1	intergenic	intergenic_circRNA	intergenic_circRNA	chr4.1:76655276-76696105	NA	NA	NA	NA
circRNA308	0	0	15.4623	0	0	0	0	0	1	0	0	0	inf	up	1	1	no	chr4.1	12743014	12744534	-	4	circRNA	MS.gene27872.t1	MS.gene27872	chr4.1:12739776-12743013|chr4.1:12744534-12745004	elongation factor 1-alpha isoform X1 [Medicago truncatula]	GO:0003924(GTPase activity);GO:0005622(intracellular);GO:0006412(translation);GO:0032790(ribosome disassembly)	03015(mRNA surveillance pathway)	NA
circRNA314	0	0	61.8494	0	0	0	0	0	4	0	0	0	inf	up	1	1	no	chr3.1	5009085	5030062	+	1	intergenic	intergenic_circRNA	intergenic_circRNA	chr3.1:5009084-5030062	NA	NA	NA	NA
