# Supplementary material for: Integrated agronomic, physiological, microstructure, and whole-transcriptome analyses reveal the role of biomass accumulation and quality formation during Se biofortification in alfalfa
Source: Front Plant Sci. 2023 Jul 20;14:1198847. doi: 10.3389/fpls.2023.1198847 (PMC10400095; doi:10.3389/fpls.2023.1198847)
Supplement: Supplementary Table S6 — Targeted mRNAs of these DEmiRNAs in alfalfa under Se biofortification. [file Table_6.xlsx]

## Sheet: Target_predict_annotation
miRNA ID	MS.gene52852	Gene Annoation	Range	Score
mtr-MIR2678-p5	MS.gene046765	uncharacterized protein LOC112419378 [Medicago truncatula]	146-166	2.2
mtr-MIR2678-p5	MS.gene90611	putative BPI/LBP family protein At1g04970 [Medicago truncatula]	48-67	2.5
mtr-MIR2678-p5	MS.gene001905	transcription factor GTE12-like protein [Trifolium pratense]	96-115	2.5
mtr-MIR2678-p5	MS.gene001886	transcription factor GTE12-like protein [Trifolium pratense]	96-115	2.5
mtr-MIR2678-p5	MS.gene038251	uncharacterized protein LOC112419378 [Medicago truncatula]	212-232	2.2
mtr-MIR2678-p5	MS.gene76003	uncharacterized protein LOC112419378 [Medicago truncatula]	146-166	2.2
mtr-MIR2678-p5	MS.gene25908	putative transferase At4g12130, mitochondrial [Medicago truncatula]	382-403	2.2
mtr-MIR2678-p5	MS.gene020820	uncharacterized protein LOC112419378 [Medicago truncatula]	882-901	2.5
mtr-MIR2678-p5	MS.gene028973	uncharacterized protein LOC25488301 [Medicago truncatula]	540-559	2.5
mtr-MIR2678-p5	MS.gene056695	uncharacterized protein LOC112419378 [Medicago truncatula]	170-190	2.2
mtr-MIR2678-p5	MS.gene056597	probable hydroxyacylglutathione hydrolase 2, chloroplastic isoform X1 [Medicago truncatula]	257-277	1.8
mtr-MIR2678-p5	MS.gene31190	uncharacterized protein LOC112419378 [Medicago truncatula]	212-232	2.2
mtr-MIR2678-p5	MS.gene54664	hypothetical protein TSUD_283720 [Trifolium subterraneum]	144-163	2.5
mtr-MIR2678-p5	MS.gene055774	receptor-like protein kinase HSL1 [Medicago truncatula]	1250-1270	2
mtr-MIR2678-p5	MS.gene78318	uncharacterized protein LOC11432260 [Medicago truncatula]	1019-1039	2.2
mtr-MIR2678-p5	MS.gene028970	uncharacterized protein LOC25488301 [Medicago truncatula]	1350-1369	2.5
mtr-MIR2678-p5	MS.gene67416	ABC transporter C family member 10 [Medicago truncatula]	566-586	1.8
mtr-MIR2678-p5	MS.gene83987	uncharacterized protein LOC112419378 [Medicago truncatula]	146-166	2.2
mtr-MIR2678-p5	MS.gene77017	uncharacterized protein LOC112419378 [Medicago truncatula]	143-163	2.2
mtr-MIR2678-p5	MS.gene073981	putative protein kinase TKL-Pl-6 family [Medicago truncatula]	1098-1117	1.5
mtr-MIR2678-p5	MS.gene48882	vesicle-associated protein 1-2 [Medicago truncatula]	308-328	2.5
mtr-MIR2678-p5	MS.gene070021	RNA-binding region RNP-1 (RNA recognition motif) [Medicago truncatula]	378-397	2.5
mtr-MIR2678-p5	MS.gene85101	zinc finger protein GIS2, partial [Trifolium pratense]	640-660	2.5
mtr-MIR2678-p5	MS.gene046882	disease resistance protein (TIR-NBS-LRR class), putative [Medicago truncatula]	335-355	0
mtr-MIR2678-p5	MS.gene83284	disease resistance protein (TIR-NBS-LRR class) [Medicago truncatula]	338-358	1
mtr-MIR2678-p5	MS.gene33708	disease resistance protein (TIR-NBS-LRR class) [Medicago truncatula]	401-421	2
mtr-MIR2678-p5	MS.gene98834	disease resistance protein (TIR-NBS-LRR class) [Medicago truncatula]	464-484	0.2
mtr-MIR2678-p5	MS.gene058658	TMV resistance protein N [Medicago truncatula]	356-376	2.5
mtr-MIR2678-p5	MS.gene040145	uncharacterized GPI-anchored protein At4g28100 [Medicago truncatula]	873-892	2
mtr-MIR2678-p5	MS.gene057919	uncharacterized protein LOC25488668 [Medicago truncatula]	1101-1120	2.5
mtr-MIR2678-p5	MS.gene061496	TMV resistance protein N [Medicago truncatula]	338-358	0.2
mtr-MIR2678-p5	MS.gene061493	disease resistance protein (TIR-NBS-LRR class), putative [Medicago truncatula]	338-358	0
mtr-MIR2678-p5	MS.gene061487	TMV resistance protein N [Medicago truncatula]	335-355	0.2
mtr-MIR2678-p5	MS.gene061479	disease resistance protein (TIR-NBS-LRR class) [Medicago truncatula]	338-358	0.2
mtr-MIR2678-p5	MS.gene061475	putative winged helix-turn-helix DNA-binding domain, toll-like receptor [Medicago truncatula]	338-358	0.2
mtr-MIR2678-p5	MS.gene061453	uncharacterized protein LOC25496950 [Medicago truncatula]	236-256	2
mtr-MIR2678-p5	MS.gene061451	uncharacterized protein LOC25496950 [Medicago truncatula]	338-358	2
mtr-MIR2678-p5	MS.gene67209	uncharacterized protein LOC25496950 [Medicago truncatula]	344-364	2
mtr-MIR2678-p5	MS.gene061450	uncharacterized protein LOC25496950 [Medicago truncatula]	242-262	2
mtr-MIR2678-p5	MS.gene061449	uncharacterized protein LOC25496950 [Medicago truncatula]	242-262	2
mtr-MIR2678-p5	MS.gene46700	uncharacterized protein LOC112419378 [Medicago truncatula]	710-730	2.2
mtr-MIR2678-p5	MS.gene87023	hypothetical protein TSUD_178120 [Trifolium subterraneum]	362-382	2.5
mtr-MIR2678-p5	MS.gene053021	putative transcription factor MADS-type1 family [Medicago truncatula]	113-133	2.5
mtr-MIR2678-p5	MS.gene95638	chlorophyll synthase, chloroplastic isoform X1 [Medicago truncatula]	149-169	1.8
mtr-MIR2678-p5	MS.gene95637	TMV resistance protein N [Medicago truncatula]	2039-2059	2.2
mtr-MIR2678-p5	MS.gene95631	TMV resistance protein N isoform X3 [Medicago truncatula]	56-76	1.8
mtr-MIR2678-p5	MS.gene57082	WAT1-related protein At3g28050 isoform X1 [Medicago truncatula]	144-163	2.5
mtr-MIR2678-p5	MS.gene018307	TIR-NBS-LRR class disease resistance protein [Medicago truncatula]	338-358	2
mtr-MIR2678-p5	MS.gene46572	transcription factor GTE12-like protein [Trifolium pratense]	96-115	2.5
mtr-MIR2678-p5	MS.gene46573	transcription factor GTE12-like protein [Trifolium pratense]	96-115	2.5
mtr-MIR2678-p5	MS.gene46576	transcription factor GTE12-like protein [Trifolium pratense]	96-115	2.5
mtr-MIR2678-p5	MS.gene87160	uncharacterized protein LOC112419378 [Medicago truncatula]	65-85	2.2
mtr-MIR2678-p5	MS.gene87183	DNA replication ATP-dependent helicase/nuclease DNA2 isoform X1 [Medicago truncatula]	2351-2371	2.2
mtr-MIR2678-p5	MS.gene049665	protein DJ-1 homolog D [Medicago truncatula]	796-817	1.8
mtr-MIR2678-p5	MS.gene049671	uncharacterized protein At5g08430 [Medicago truncatula]	1250-1270	1.8
mtr-MIR2678-p5	MS.gene026607	nicotinate-nucleotide pyrophosphorylase [carboxylating], chloroplastic [Medicago truncatula]	238-259	2.2
mtr-MIR2678-p5	MS.gene043460	receptor-like protein kinase HSL1 [Medicago truncatula]	1250-1270	2
mtr-MIR2678-p5	MS.gene043449	probable aminotransferase TAT2 [Medicago truncatula]	1182-1201	2.5
mtr-MIR2678-p5	MS.gene043447	probable aminotransferase TAT2 [Medicago truncatula]	1182-1201	2.5
mtr-MIR2678-p5	MS.gene022251	putative transferase At4g12130, mitochondrial [Medicago truncatula]	382-403	2.2
mtr-MIR2678-p5	MS.gene026475	replication factor A protein 1 [Medicago truncatula]	732-751	2.5
mtr-MIR2678-p5	MS.gene69845	TMV resistance protein N isoform X1 [Medicago truncatula]	443-463	1.8
mtr-MIR2678-p5	MS.gene69842	TMV resistance protein N isoform X1 [Medicago truncatula]	326-346	1.5
mtr-MIR2678-p5	MS.gene29266	cytochrome P450 86B1 [Medicago truncatula]	663-682	2.2
mtr-MIR2678-p5	MS.gene057669	delta(24)-sterol reductase [Medicago truncatula]	318-337	2.2
mtr-MIR2678-p5	MS.gene026923	probable leucine-rich repeat receptor-like serine/threonine-protein kinase At3g14840 [Medicago truncatula]	146-166	2.2
mtr-MIR2678-p5	MS.gene94983	lachrymatory-factor synthase [Medicago truncatula]	371-391	2.5
mtr-MIR2678-p5	MS.gene80838	disease resistance protein (TIR-NBS-LRR class), putative [Medicago truncatula]	338-358	0.2
mtr-MIR2678-p5	MS.gene69050	uncharacterized protein LOC25496950 [Medicago truncatula]	278-298	2.2
mtr-MIR2678-p5	MS.gene28327	probable hydroxyacylglutathione hydrolase 2, chloroplastic isoform X1 [Medicago truncatula]	257-277	1.8
mtr-MIR2678-p5	MS.gene69025	disease resistance protein (TIR-NBS-LRR class) [Medicago truncatula]	338-358	0.2
mtr-MIR2678-p5	MS.gene69023	disease resistance protein (TIR-NBS-LRR class), putative [Medicago truncatula]	341-361	0.2
mtr-MIR2678-p5	MS.gene69013	putative winged helix-turn-helix DNA-binding domain, toll-like receptor [Medicago truncatula]	335-355	1
mtr-MIR2678-p5	MS.gene69007	disease resistance protein (TIR-NBS-LRR class), putative [Medicago truncatula]	344-364	0.2
mtr-MIR2678-p5	MS.gene69005	TMV resistance protein N [Medicago truncatula]	338-358	1.2
mtr-MIR2678-p5	MS.gene68998	disease resistance protein (TIR-NBS-LRR class), putative [Medicago truncatula]	338-358	0.2
mtr-MIR2678-p5	MS.gene68992	putative disease resistance protein At4g11170 [Medicago truncatula]	338-358	0.2
mtr-MIR2678-p5	MS.gene039022	putative protein kinase TKL-Pl-6 family [Medicago truncatula]	1098-1117	1.5
mtr-MIR2678-p5	MS.gene021111	uncharacterized protein LOC112419378 [Medicago truncatula]	146-166	2.2
mtr-MIR2678-p5	MS.gene032588	putative transcription factor MADS-type1 family [Medicago truncatula]	113-133	2.5
mtr-MIR2678-p5	MS.gene20648	WAT1-related protein At3g28050 isoform X1 [Medicago truncatula]	144-163	2.5
mtr-MIR2678-p5	MS.gene068524	uncharacterized protein LOC112419378 [Medicago truncatula]	143-163	2.2
mtr-MIR2678-p5	MS.gene99324	TMV resistance protein N-like [Cicer arietinum]	185-205	2
mtr-MIR2678-p5	MS.gene83199	putative TIR domain, P-loop containing nucleoside triphosphate hydrolase [Medicago truncatula]	209-229	2
mtr-MIR2678-p5	MS.gene38725	uncharacterized protein LOC112419378 [Medicago truncatula]	710-730	2.2
mtr-MIR2678-p5	MS.gene49390	sucrose-binding protein [Medicago truncatula]	923-943	2
mtr-MIR2678-p5	MS.gene070231	nicotianamine synthase [Medicago truncatula]	108-127	2.5
mtr-MIR2678-p5	MS.gene011614	uncharacterized protein LOC112419378 [Medicago truncatula]	176-196	2.2
mtr-MIR2678-p5	MS.gene02061	uncharacterized protein LOC112419378 [Medicago truncatula]	113-133	2.2
mtr-MIR2678-p5	MS.gene45838	replication factor A protein 1 [Medicago truncatula]	747-766	2.5
mtr-MIR2678-p5	MS.gene44991	histone-lysine N-methyltransferase SUVR5 [Medicago truncatula]	602-622	2.5
mtr-MIR2678-p5	MS.gene79822	uncharacterized protein LOC112419378 [Medicago truncatula]	212-232	2.2
mtr-MIR2678-p5	MS.gene042820	disease resistance protein (TIR-NBS-LRR class) [Medicago truncatula]	338-358	1
mtr-MIR2678-p5	MS.gene76817	QWRF motif-containing protein 2 isoform X1 [Medicago truncatula]	630-649	2.5
mtr-MIR2678-p5	MS.gene92367	LYR motif-containing protein At3g19508 [Medicago truncatula]	109-130	2.2
mtr-MIR2678-p5	MS.gene92333	disease resistance protein (TIR-NBS-LRR class) [Medicago truncatula]	413-433	2.2
mtr-MIR2678-p5	MS.gene51284	disease resistance protein (TIR-NBS-LRR class) [Medicago truncatula]	338-358	0
mtr-MIR2678-p5	MS.gene72221	uncharacterized protein LOC25496950 [Medicago truncatula]	242-262	2
mtr-MIR2678-p5	MS.gene028598	uncharacterized protein LOC112419378 [Medicago truncatula]	212-232	2.2
mtr-MIR2678-p5	MS.gene016681	uncharacterized protein LOC25501052 [Medicago truncatula]	122-142	2.2
mtr-MIR2678-p5	MS.gene028864	receptor-like protein kinase HSL1 [Medicago truncatula]	1250-1270	2
mtr-MIR2678-p5	MS.gene028873	probable aminotransferase TAT2 [Medicago truncatula]	1182-1201	2.5
mtr-MIR2678-p5	MS.gene019593	uncharacterized protein LOC112419378 [Medicago truncatula]	176-196	2.2
mtr-MIR2678-p5	MS.gene073182	TMV resistance protein N isoform X1 [Medicago truncatula]	371-391	1.8
mtr-MIR2678-p5	MS.gene84923	zinc finger protein GIS2, partial [Trifolium pratense]	602-622	2.5
mtr-MIR2678-p5	MS.gene83132	nicotinate-nucleotide pyrophosphorylase [carboxylating], chloroplastic [Medicago truncatula]	238-259	2.2
mtr-MIR2678-p5	MS.gene022814	disease resistance protein (TIR-NBS-LRR class) [Medicago truncatula]	314-334	1.2
mtr-MIR2678-p5	MS.gene77624	putative protein kinase TKL-Pl-6 family [Medicago truncatula]	1098-1117	1.5
mtr-MIR2678-p5	MS.gene026210	cytochrome P450 86B1 [Medicago truncatula]	606-625	2.2
mtr-MIR2678-p5	MS.gene05050	protein DJ-1 homolog D [Medicago truncatula]	796-817	1.8
mtr-MIR2678-p5	MS.gene53620	lachrymatory-factor synthase [Medicago truncatula]	383-403	2.5
mtr-MIR2678-p5	MS.gene059603	TMV resistance protein N isoform X2 [Medicago truncatula]	338-358	0.2
mtr-MIR2678-p5	MS.gene059575	uncharacterized protein LOC25496950 [Medicago truncatula]	438-457	2
mtr-MIR2678-p5	MS.gene059574	Avr9/Cf-9 rapidly elicited protein [Medicago truncatula]	236-256	2
mtr-MIR2678-p5	MS.gene059573	uncharacterized protein LOC25496950 [Medicago truncatula]	242-262	2
mtr-MIR2678-p5	MS.gene037147	disease resistance protein (TIR-NBS-LRR class) [Medicago truncatula]	341-361	1.5
mtr-MIR2678-p5	MS.gene025931	uncharacterized protein LOC112419378 [Medicago truncatula]	146-166	2.2
mtr-MIR2678-p5	MS.gene074398	putative transferase At4g12130, mitochondrial [Medicago truncatula]	382-403	2.2
mtr-MIR2678-p5	MS.gene066541	uncharacterized protein LOC11432260 [Medicago truncatula]	1019-1039	2.2
mtr-MIR2678-p5	MS.gene55998	nicotianamine synthase [Medicago truncatula]	216-235	2.5
mtr-MIR2678-p5	MS.gene81677	putative BPI/LBP family protein At1g04970 [Medicago truncatula]	48-67	2.5
mtr-MIR2678-p5	MS.gene60335	uncharacterized protein LOC112419378 [Medicago truncatula]	176-196	2.2
mtr-MIR2678-p5	MS.gene50535	sucrose-binding protein [Medicago truncatula]	923-943	2
mtr-MIR2678-p5	MS.gene011910	histone-lysine N-methyltransferase SUVR5 [Medicago truncatula]	602-622	2.5
mtr-MIR2678-p5	MS.gene40535	LYR motif-containing protein At3g19508 [Medicago truncatula]	109-130	2.2
mtr-MIR2678-p5	MS.gene023963	TMV resistance protein N [Medicago truncatula]	356-376	2.5
mtr-MIR2678-p5	MS.gene60801	uncharacterized protein LOC112419378 [Medicago truncatula]	155-175	2.2
mtr-MIR2678-p5	MS.gene94653	uncharacterized GPI-anchored protein At4g28100 [Medicago truncatula]	782-801	2
mtr-MIR2678-p5	MS.gene25502	uncharacterized protein LOC112419378 [Medicago truncatula]	710-730	2.2
mtr-MIR2678-p5	MS.gene31428	receptor-like protein kinase HSL1 [Medicago truncatula]	1250-1270	2
mtr-MIR2678-p5	MS.gene09544	transcription factor MYB44 [Medicago truncatula]	621-640	2.5
mtr-MIR2678-p5	MS.gene57050	transcription factor MYB44 [Medicago truncatula]	621-640	2.5
mtr-MIR2678-p5	MS.gene31442	probable aminotransferase TAT2 [Medicago truncatula]	1182-1201	2.5
mtr-MIR2678-p5	MS.gene31500	uncharacterized protein LOC112419378 [Medicago truncatula]	710-730	2.2
mtr-MIR2678-p5	MS.gene060277	QWRF motif-containing protein 2 isoform X1 [Medicago truncatula]	624-643	2.5
mtr-MIR2678-p5	MS.gene029468	uncharacterized protein LOC112419378 [Medicago truncatula]	146-166	2.2
mtr-MIR2678-p5	MS.gene46566	transcription factor GTE12-like protein [Trifolium pratense]	96-115	2.5
mtr-MIR2678-p5	MS.gene29999	DNA replication ATP-dependent helicase/nuclease DNA2 isoform X1 [Medicago truncatula]	2303-2323	2.2
mtr-MIR2678-p5	MS.gene92167	putative protein kinase TKL-Pl-6 family [Medicago truncatula]	1098-1117	1.5
mtr-MIR2678-p5	MS.gene73582	transcription factor GTE12-like protein [Trifolium pratense]	96-115	2.5
mtr-MIR2678-p5	MS.gene23861	putative leucine-rich repeat domain, L domain-containing protein [Medicago truncatula]	369-388	2.5
mtr-MIR2678-p5	MS.gene62990	nicotinate-nucleotide pyrophosphorylase [carboxylating], chloroplastic [Medicago truncatula]	238-259	2.2
mtr-MIR2678-p5	MS.gene031585	disease resistance protein (TIR-NBS-LRR class), putative [Medicago truncatula]	426-446	2
mtr-MIR2678-p5	MS.gene031586	TMV resistance protein N [Medicago truncatula]	379-399	0
mtr-MIR2678-p5	MS.gene058228	nicotianamine synthase [Medicago truncatula]	723-742	2.5
mtr-MIR2678-p5	MS.gene52113	delta(24)-sterol reductase [Medicago truncatula]	318-337	2.2
mtr-MIR2678-p5	MS.gene44866	hypothetical protein MtrunA17_Chr5g0429551 [Medicago truncatula]	458-478	2.2
mtr-MIR2678-p5	MS.gene29289	uncharacterized protein LOC11432260 [Medicago truncatula]	1019-1039	2.2
mtr-MIR2678-p5	MS.gene64289	lachrymatory-factor synthase [Medicago truncatula]	374-394	2.5
mtr-MIR2678-p5	MS.gene056395	probable hydroxyacylglutathione hydrolase 2, chloroplastic isoform X1 [Medicago truncatula]	257-277	1.8
mtr-MIR2678-p5	MS.gene41179	uncharacterized protein LOC112419378 [Medicago truncatula]	146-166	2.2
mtr-MIR2678-p5	MS.gene034659	prolycopene isomerase, chloroplastic isoform X1 [Medicago truncatula]	378-397	1.8
mtr-MIR2678-p5	MS.gene98525	putative BPI/LBP family protein At1g04970 [Medicago truncatula]	48-67	2.5
mtr-MIR2678-p5	MS.gene002364	uncharacterized protein LOC112419378 [Medicago truncatula]	596-616	2.2
mtr-MIR2678-p5	MS.gene87380	histone-lysine N-methyltransferase SUVR5 [Medicago truncatula]	602-622	2.5
mtr-MIR2678-p5	MS.gene28512	histone-lysine N-methyltransferase SUVR5 [Medicago truncatula]	602-622	2.5
mtr-MIR2678-p5	MS.gene024971	LYR motif-containing protein At3g19508 [Medicago truncatula]	109-130	2.2
mtr-MIR2678-p5	MS.gene76668	vesicle-associated protein 1-2 isoform X1 [Medicago truncatula]	308-328	2.5
mtr-MIR2678-p5	MS.gene98772	uncharacterized protein LOC112419378 [Medicago truncatula]	227-247	2.2
mtr-MIR2678-p5	MS.gene50873	uncharacterized protein LOC25488668 [Medicago truncatula]	1092-1111	2.5
mtr-MIR2678-p5	MS.gene85447	TMV resistance protein N [Medicago truncatula]	356-376	2.5
mtr-MIR2678-p5	MS.gene026718	uncharacterized protein LOC112419378 [Medicago truncatula]	146-166	2.2
mtr-MIR2678-p5	MS.gene93777	uncharacterized GPI-anchored protein At4g28100 [Medicago truncatula]	873-892	2
mtr-MIR2678-p5	MS.gene62615	uncharacterized GPI-anchored protein At4g28100 [Medicago truncatula]	873-892	2
mtr-MIR2678-p5	MS.gene006408	uncharacterized protein LOC112419378 [Medicago truncatula]	635-655	2.2
mtr-MIR2678-p5	MS.gene91298	QWRF motif-containing protein 2 isoform X1 [Medicago truncatula]	735-754	2.5
mtr-MIR2678-p5	MS.gene82638	hypothetical protein MtrunA17_Chr3g0098341 [Medicago truncatula]	98-118	2.2
mtr-MIR2678-p5	MS.gene016680	uncharacterized protein LOC25501052 [Medicago truncatula]	249-269	2.2
mtr-MIR2678-p5	MS.gene037259	transcription factor GTE12-like protein [Trifolium pratense]	96-115	2.5
mtr-MIR2678-p5	MS.gene91932	uncharacterized protein LOC112419378 [Medicago truncatula]	146-166	2.2
mtr-MIR2678-p5	MS.gene52489	uncharacterized protein LOC112419378 [Medicago truncatula]	710-730	2.2
mtr-MIR2678-p5	MS.gene52490	uncharacterized protein LOC112419378 [Medicago truncatula]	755-775	2.2
mtr-MIR2678-p5	MS.gene52524	DNA replication ATP-dependent helicase/nuclease DNA2 isoform X1 [Medicago truncatula]	2342-2362	2.2
mtr-MIR2678-p5	MS.gene71512	zinc finger protein GIS2, partial [Trifolium pratense]	917-937	2.5
mtr-MIR2678-p5	MS.gene008364	protein DJ-1 homolog D [Medicago truncatula]	796-817	1.8
mtr-MIR2678-p5	MS.gene008357	uncharacterized protein At5g08430 [Medicago truncatula]	956-976	1.8
mtr-MIR2678-p5	MS.gene011063	uncharacterized protein LOC112419378 [Medicago truncatula]	914-934	2.2
mtr-MIR2678-p5	MS.gene020129	disease resistance protein (TIR-NBS-LRR class) [Trifolium pratense]	245-265	2.2
mtr-MIR2678-p5	MS.gene59143	nicotinate-nucleotide pyrophosphorylase [carboxylating], chloroplastic [Medicago truncatula]	238-259	2.2
mtr-MIR2678-p5	MS.gene70581	putative transferase At4g12130, mitochondrial [Medicago truncatula]	382-403	2.2
mtr-MIR2678-p5	MS.gene91810	obtusifoliol 14-alpha demethylase [Medicago truncatula]	359-379	2.2
mtr-MIR2678-p5	MS.gene88569	cytochrome P450 86B1 [Medicago truncatula]	663-682	2.2
mtr-MIR2678-p5	MS.gene73869	TMV resistance protein N [Medicago truncatula]	338-358	0
mtr-MIR2678-p5	MS.gene064976	lachrymatory-factor synthase [Medicago truncatula]	374-394	2.5
mtr-MIR2678-p5	MS.gene29756	putative BPI/LBP family protein At1g04970 [Medicago truncatula]	48-67	2.5
mtr-MIR2678-p5	MS.gene003481	delta(24)-sterol reductase [Medicago truncatula]	318-337	2.2
mtr-MIR2678-p5	MS.gene06378	uncharacterized protein LOC112419378 [Medicago truncatula]	1580-1600	2.2
mtr-MIR2678-p5	MS.gene003868	hydroxyacylglutathione hydrolase 2, mitochondrial isoform X2 [Medicago truncatula]	71-91	1.8
mtr-MIR2678-p5	MS.gene046951	LYR motif-containing protein At3g19508 [Medicago truncatula]	109-130	2.2
mtr-MIR2678-p5	MS.gene046915	disease resistance protein (TIR-NBS-LRR class) [Medicago truncatula]	335-355	2.2
mtr-MIR2678-p5	MS.gene015536	uncharacterized protein LOC112419378 [Medicago truncatula]	650-670	2.2
mtr-MIR2678-p5	MS.gene015534	uncharacterized protein LOC112419378 [Medicago truncatula]	650-670	2.2
mtr-MIR2678-p5	MS.gene46395	uncharacterized protein LOC112419378 [Medicago truncatula]	212-232	2.2
mtr-MIR2678-p5	MS.gene015207	transcription factor MYB44 [Medicago truncatula]	621-640	2.5
mtr-MIR2678-p5	MS.gene59389	uncharacterized protein LOC112419378 [Medicago truncatula]	146-166	2.2
mtr-MIR2678-p5	MS.gene82175	vesicle-associated protein 1-2 [Medicago truncatula]	308-328	2.5
mtr-MIR2678-p5	MS.gene82174	vesicle-associated protein 1-2 [Medicago truncatula]	308-328	2.5
mtr-MIR2678-p5	MS.gene42138	disease resistance protein (TIR-NBS-LRR class) [Medicago truncatula]	274-294	2.5
mtr-MIR2678-p5	MS.gene65743	uncharacterized protein LOC112419378 [Medicago truncatula]	227-247	2.2
mtr-MIR2678-p5	MS.gene94702	TMV resistance protein N isoform X3 [Medicago truncatula]	377-397	1.5
mtr-MIR2678-p5	MS.gene94688	TMV resistance protein N isoform X6 [Cicer arietinum]	56-76	1.5
mtr-MIR2678-p5	MS.gene65004	hypothetical protein TSUD_370240 [Trifolium subterraneum]	138-157	2.5
mtr-MIR2678-p5	MS.gene95204	uncharacterized protein LOC25488668 [Medicago truncatula]	1104-1123	2.5
mtr-MIR2678-p5	MS.gene89910	TMV resistance protein N [Medicago truncatula]	278-298	2.5
mtr-MIR2678-p5	MS.gene95894	uncharacterized GPI-anchored protein At4g28100 [Medicago truncatula]	879-898	2
mtr-MIR2678-p5	MS.gene037206	uncharacterized protein LOC112419378 [Medicago truncatula]	143-163	2.2
mtr-MIR2678-p5	MS.gene029677	uncharacterized protein LOC112419378 [Medicago truncatula]	2417-2437	2.2
mtr-MIR2678-p5	MS.gene054923	DNA replication ATP-dependent helicase/nuclease DNA2 isoform X1 [Medicago truncatula]	2348-2368	2.2
mtr-MIR2678-p5	MS.gene94108	uncharacterized protein LOC112419378 [Medicago truncatula]	698-718	2.2
mtr-MIR2678-p5	MS.gene061595	protein DJ-1 homolog D [Medicago truncatula]	796-817	1.8
mtr-MIR2678-p5	MS.gene061591	uncharacterized protein At5g08430 [Medicago truncatula]	1115-1135	1.8
mtr-MIR2678-p5	MS.gene022558	obtusifoliol 14-alpha demethylase [Medicago truncatula]	359-379	2.2
mtr-MIR2678-p3_1ss20CT	MS.gene046882	disease resistance protein (TIR-NBS-LRR class), putative [Medicago truncatula]	188-208	1
mtr-MIR2678-p3_1ss20CT	MS.gene83284	disease resistance protein (TIR-NBS-LRR class) [Medicago truncatula]	191-211	0.5
mtr-MIR2678-p3_1ss20CT	MS.gene98834	disease resistance protein (TIR-NBS-LRR class) [Medicago truncatula]	317-337	0
mtr-MIR2678-p3_1ss20CT	MS.gene061493	disease resistance protein (TIR-NBS-LRR class), putative [Medicago truncatula]	191-211	1.5
mtr-MIR2678-p3_1ss20CT	MS.gene061487	TMV resistance protein N [Medicago truncatula]	188-208	1.5
mtr-MIR2678-p3_1ss20CT	MS.gene061479	disease resistance protein (TIR-NBS-LRR class) [Medicago truncatula]	191-211	1
mtr-MIR2678-p3_1ss20CT	MS.gene061475	putative winged helix-turn-helix DNA-binding domain, toll-like receptor [Medicago truncatula]	191-211	1
mtr-MIR2678-p3_1ss20CT	MS.gene87023	hypothetical protein TSUD_178120 [Trifolium subterraneum]	214-235	2.5
mtr-MIR2678-p3_1ss20CT	MS.gene001975	DNA replication licensing factor MCM6 isoform X1 [Abrus precatorius]	89-109	2
mtr-MIR2678-p3_1ss20CT	MS.gene80838	disease resistance protein (TIR-NBS-LRR class), putative [Medicago truncatula]	191-211	0
mtr-MIR2678-p3_1ss20CT	MS.gene69025	disease resistance protein (TIR-NBS-LRR class) [Medicago truncatula]	191-211	1.5
mtr-MIR2678-p3_1ss20CT	MS.gene69023	disease resistance protein (TIR-NBS-LRR class), putative [Medicago truncatula]	194-214	0
mtr-MIR2678-p3_1ss20CT	MS.gene69013	putative winged helix-turn-helix DNA-binding domain, toll-like receptor [Medicago truncatula]	188-208	1
mtr-MIR2678-p3_1ss20CT	MS.gene69007	disease resistance protein (TIR-NBS-LRR class), putative [Medicago truncatula]	197-217	0
mtr-MIR2678-p3_1ss20CT	MS.gene69005	TMV resistance protein N [Medicago truncatula]	191-211	0
mtr-MIR2678-p3_1ss20CT	MS.gene68998	disease resistance protein (TIR-NBS-LRR class), putative [Medicago truncatula]	191-211	0
mtr-MIR2678-p3_1ss20CT	MS.gene68992	putative disease resistance protein At4g11170 [Medicago truncatula]	191-211	1
mtr-MIR2678-p3_1ss20CT	MS.gene042820	disease resistance protein (TIR-NBS-LRR class) [Medicago truncatula]	191-211	0.5
mtr-MIR2678-p3_1ss20CT	MS.gene51284	disease resistance protein (TIR-NBS-LRR class) [Medicago truncatula]	191-211	2.5
mtr-MIR2678-p3_1ss20CT	MS.gene059603	TMV resistance protein N isoform X2 [Medicago truncatula]	191-211	0
mtr-MIR2678-p3_1ss20CT	MS.gene037147	disease resistance protein (TIR-NBS-LRR class) [Medicago truncatula]	194-214	2
mtr-MIR2678-p3_1ss20CT	MS.gene80135	serine/threonine-protein kinase STN7, chloroplastic [Medicago truncatula]	1433-1453	2.5
mtr-MIR2678-p3_1ss20CT	MS.gene042677	serine/threonine-protein kinase STN7, chloroplastic [Medicago truncatula]	1433-1453	2.5
mtr-MIR2678-p3_1ss20CT	MS.gene031585	disease resistance protein (TIR-NBS-LRR class), putative [Medicago truncatula]	279-299	2.2
mtr-MIR2678-p3_1ss20CT	MS.gene43158	TIR-NBS-LRR resistance protein [Trifolium pratense]	217-238	2.5
mtr-MIR2678-p3_1ss20CT	MS.gene053912	serine/threonine-protein kinase STN7, chloroplastic [Medicago truncatula]	1436-1456	2.5
mtr-MIR2678-p3_1ss20CT	MS.gene78719	serine/threonine-protein kinase STN7, chloroplastic [Medicago truncatula]	1433-1453	2.5
mtr-MIR5563-p3_1ss5GA	MS.gene071871	unknown [Medicago truncatula]	516-535	2.5
mtr-MIR5563-p3_1ss5GA	MS.gene071870	pathogenesis-related protein 1 [Medicago truncatula]	690-709	2.5
mtr-MIR5267c-p3_2ss14AT17AG	MS.gene83972	ribonuclease H, partial [Trifolium pratense]	228-250	2
mtr-MIR5267c-p3_2ss14AT17AG	MS.gene26770	SWI/SNF-related matrix-associated actin-dependent regulator of chromatin subfamily A-like protein 1 [Medicago truncatula]	919-942	2.5
mtr-MIR5267c-p3_2ss14AT17AG	MS.gene030172	SWI/SNF-related matrix-associated actin-dependent regulator of chromatin subfamily A-like protein 1 [Medicago truncatula]	919-942	2.5
mtr-MIR5267c-p3_2ss14AT17AG	MS.gene064134	SWI/SNF-related matrix-associated actin-dependent regulator of chromatin subfamily A-like protein 1 [Medicago truncatula]	919-942	2.5
PC-3p-42904_120	MS.gene92455	separase-like protein [Medicago truncatula]	5645-5667	1.5
PC-3p-42904_120	MS.gene031643	general transcription factor 3C polypeptide 3 [Medicago truncatula]	1953-1973	2
PC-3p-42904_120	MS.gene045529	general transcription factor 3C polypeptide 3 [Medicago truncatula]	2036-2056	2
PC-3p-42904_120	MS.gene031641	general transcription factor 3C polypeptide 3 [Medicago truncatula]	599-619	2
PC-3p-42904_120	MS.gene064066	ectonucleotide pyrophosphatase/phosphodiesterase family member 1 [Medicago truncatula]	957-978	2.5
PC-3p-42904_120	MS.gene66296	ectonucleotide pyrophosphatase/phosphodiesterase family member 1 [Medicago truncatula]	1098-1119	2.5
PC-3p-42904_120	MS.gene91055	separase-like protein [Medicago truncatula]	5591-5613	1.5
PC-3p-42904_120	MS.gene030274	ectonucleotide pyrophosphatase/phosphodiesterase family member 1 [Medicago truncatula]	957-978	2.5
PC-3p-42904_120	MS.gene75089	ectonucleotide pyrophosphatase/phosphodiesterase family member 1 [Medicago truncatula]	1092-1113	2.5
PC-3p-42904_120	MS.gene033780	putative non-specific serine/threonine protein kinase [Medicago truncatula]	1258-1279	2.2
PC-3p-42904_120	MS.gene66300	ectonucleotide pyrophosphatase/phosphodiesterase family member 1 [Medicago truncatula]	1098-1119	2.5
PC-3p-42904_120	MS.gene061426	separase-like protein [Medicago truncatula]	5297-5319	1.5
PC-3p-42904_120	MS.gene036330	putative non-specific serine/threonine protein kinase [Medicago truncatula]	1084-1105	2.2
PC-3p-42904_120	MS.gene036320	putative non-specific serine/threonine protein kinase [Medicago truncatula]	1729-1750	2.2
PC-3p-42904_120	MS.gene95909	ribonuclease H, partial [Trifolium pratense]	618-639	2.5
PC-3p-42904_120	MS.gene032490	separase-like protein [Medicago truncatula]	5615-5637	1.5
gma-miR1514a-3p_L-1R+1_1ss13AG	MS.gene074112	DUF295 family protein [Medicago truncatula]	292-313	2.5
gma-miR1514a-3p_L-1R+1_1ss13AG	MS.gene55479	DUF295 family protein [Medicago truncatula]	292-313	2.5
gma-miR1514a-3p_L-1R+1_1ss13AG	MS.gene47120	DUF295 family protein [Medicago truncatula]	508-529	2.5
gma-miR1514a-3p_L-1R+1_1ss13AG	MS.gene017745	F-box plant-like protein [Medicago truncatula]	361-381	2.5
PC-5p-207897_16	MS.gene66652	R3H and coiled-coil domain-containing protein 1 [Medicago truncatula]	271-291	2.5
PC-5p-207897_16	MS.gene24372	uncharacterized protein LOC25482069 isoform X1 [Medicago truncatula]	1714-1734	2.5
PC-5p-207897_16	MS.gene044730	R3H and coiled-coil domain-containing protein 1 [Medicago truncatula]	271-291	2.5
PC-5p-207897_16	MS.gene070611	probable ADP-ribosylation factor GTPase-activating protein AGD5 [Medicago truncatula]	1005-1025	2.5
PC-5p-207897_16	MS.gene71386	probable disease resistance protein At5g66900 [Medicago truncatula]	1648-1668	2.2
PC-5p-207897_16	MS.gene88366	uncharacterized protein LOC25487405 [Medicago truncatula]	914-933	2
PC-5p-207897_16	MS.gene044011	uncharacterized protein LOC25482069 isoform X1 [Medicago truncatula]	1714-1734	2.5
PC-5p-207897_16	MS.gene29928	probable ADP-ribosylation factor GTPase-activating protein AGD5 [Medicago truncatula]	1002-1022	2.5
PC-5p-207897_16	MS.gene041131	probable disease resistance protein At5g66900 [Medicago truncatula]	1648-1668	2.2
PC-5p-207897_16	MS.gene67097	uncharacterized protein LOC25482069 isoform X1 [Medicago truncatula]	1714-1734	2.5
PC-5p-207897_16	MS.gene61652	R3H and coiled-coil domain-containing protein 1 [Medicago truncatula]	271-291	2.5
PC-5p-207897_16	MS.gene90446	putative disease resistance RPP13-like protein 1 [Medicago truncatula]	390-410	2
PC-5p-207897_16	MS.gene047675	probable disease resistance protein At5g66900 [Medicago truncatula]	1648-1668	2.2
PC-5p-207897_16	MS.gene29926	probable ADP-ribosylation factor GTPase-activating protein AGD5 [Medicago truncatula]	462-482	2.5
PC-5p-207897_16	MS.gene062768	uncharacterized protein LOC25482069 isoform X1 [Medicago truncatula]	1714-1734	2.5
PC-5p-207897_16	MS.gene024793	NA	280-300	2.5
PC-5p-207897_16	MS.gene010400	probable disease resistance protein At5g66900 [Medicago truncatula]	1648-1668	2.2
PC-5p-207897_16	MS.gene96110	R3H and coiled-coil domain-containing protein 1 [Medicago truncatula]	271-291	2.5
PC-5p-207897_16	MS.gene046096	probable ADP-ribosylation factor GTPase-activating protein AGD5 [Medicago truncatula]	954-974	2.5
PC-3p-27246_185	MS.gene072614	Pentatricopeptide repeat [Medicago truncatula]	789-809	2.2
PC-3p-27246_185	MS.gene75866	regulator of nonsense transcripts UPF2 isoform X1 [Medicago truncatula]	454-474	2.5
PC-3p-27246_185	MS.gene97481	hypothetical protein GLYMA_08G351900 [Glycine max]	494-515	2.5
PC-3p-27246_185	MS.gene97480	aminocyclopropanecarboxylate oxidase, putative [Medicago truncatula]	311-332	2.5
PC-3p-27246_185	MS.gene053634	uncharacterized protein LOC112421329 [Medicago truncatula]	1149-1169	2.5
PC-3p-27246_185	MS.gene033864	regulator of nonsense transcripts UPF2 isoform X1 [Medicago truncatula]	454-474	2.5
PC-3p-27246_185	MS.gene074027	F-box/kelch-repeat protein At1g26930 [Medicago truncatula]	298-318	2
PC-3p-27246_185	MS.gene069519	regulator of nonsense transcripts-like protein [Medicago truncatula]	454-474	2.5
PC-3p-27246_185	MS.gene28657	pentatricopeptide repeat-containing protein At2g22070 [Medicago truncatula]	789-809	2.2
PC-3p-27246_185	MS.gene050813	Pentatricopeptide repeat [Medicago truncatula]	1068-1088	2.2
PC-3p-27246_185	MS.gene64397	probable receptor-like protein kinase At5g20050 [Medicago truncatula]	1074-1094	2.5
PC-3p-27246_185	MS.gene032830	F-box/kelch-repeat protein At1g26930 [Medicago truncatula]	298-318	2
PC-3p-27246_185	MS.gene028533	uncharacterized protein LOC112421329 [Medicago truncatula]	1149-1169	2.5
PC-3p-27246_185	MS.gene91909	F-box/kelch-repeat protein At1g26930 [Medicago truncatula]	298-318	2
PC-3p-27246_185	MS.gene022948	hypothetical protein GLYMA_08G351900 [Glycine max]	224-245	2.5
PC-3p-27246_185	MS.gene83931	F-box/kelch-repeat protein At1g26930 [Medicago truncatula]	298-318	2
PC-3p-27246_185	MS.gene051289	aminocyclopropanecarboxylate oxidase, putative [Medicago truncatula]	781-802	2.5
PC-3p-27246_185	MS.gene051289	aminocyclopropanecarboxylate oxidase, putative [Medicago truncatula]	179-200	2.5
PC-3p-27246_185	MS.gene40111	uncharacterized protein LOC112421329 [Medicago truncatula]	1149-1169	2.5
mtr-miR1509b	MS.gene97312	NA	156-177	2
mtr-miR1509b	MS.gene71080	putative protein kinase RLK-Pelle-RLCK-VIIa-1 family [Medicago truncatula]	137-158	2
mtr-miR1509b	MS.gene88052	putative polygalacturonase [Medicago truncatula]	11-32	2
mtr-miR1509b	MS.gene48939	hypothetical protein TSUD_72320 [Trifolium subterraneum]	785-806	2
mtr-miR1509b	MS.gene48939	hypothetical protein TSUD_72320 [Trifolium subterraneum]	413-434	2
mtr-miR1509b	MS.gene046837	DUF1639 family protein [Medicago truncatula]	75-96	1.5
mtr-miR1509b	MS.gene31714	transmembrane protein, putative [Medicago truncatula]	44-65	2
mtr-miR1509b	MS.gene54901	hypothetical protein MtrunA17_Chr4g0019421 [Medicago truncatula]	140-161	1.2
mtr-miR1509b	MS.gene48084	putative protein kinase RLK-Pelle-RLCK-VIIa-1 family [Medicago truncatula]	137-158	2
mtr-miR1509b	MS.gene99395	transmembrane protein, putative [Medicago truncatula]	543-564	2.5
mtr-miR1509b	MS.gene059206	hypothetical protein TSUD_72320 [Trifolium subterraneum]	413-434	2
mtr-miR1509b	MS.gene046835	hypothetical protein MtrunA17_Chr3g0091881 [Medicago truncatula]	732-753	2
mtr-miR1509b	MS.gene023103	hypothetical protein MtrunA17_Chr6g0462201 [Medicago truncatula]	35-56	2
mtr-miR1509b	MS.gene74941	NA	356-377	1
mtr-miR1509b	MS.gene32442	hypothetical protein MtrunA17_Chr1g0157531 [Medicago truncatula]	44-65	2
mtr-miR1509b	MS.gene067536	DUF1639 family protein [Medicago truncatula]	681-702	2
mtr-miR1509b	MS.gene070673	DUF1639 family protein [Medicago truncatula]	681-702	2
mtr-miR1509b	MS.gene067534	DUF1639 family protein [Medicago truncatula]	639-660	2
gma-miR172h-5p_R-1	MS.gene73475	hypothetical protein MTR_1g016950 [Medicago truncatula]	23-41	2.5
gma-miR172h-5p_R-1	MS.gene73417	alpha,alpha-trehalose-phosphate synthase [UDP-forming] 5 [Medicago truncatula]	1488-1508	2
gma-miR172h-5p_R-1	MS.gene062402	putative pentatricopeptide repeat-containing protein At1g16830 [Medicago truncatula]	326-344	2.5
gma-miR172h-5p_R-1	MS.gene96775	ribulose-1,5 bisphosphate carboxylase/oxygenase large subunit N-methyltransferase, chloroplastic [Medicago truncatula]	315-335	2.5
gma-miR172h-5p_R-1	MS.gene25937	trehalose-6-phosphate synthase domain protein [Medicago truncatula]	2443-2462	2.5
gma-miR172h-5p_R-1	MS.gene59941	hypothetical protein MtrunA17_Chr2g0315531 [Medicago truncatula]	719-737	2.2
gma-miR172h-5p_R-1	MS.gene031764	ADP-ribosylation factor [Medicago truncatula]	66-86	2.5
gma-miR172h-5p_R-1	MS.gene25822	GPN-loop GTPase 3 [Medicago truncatula]	106-125	1
gma-miR172h-5p_R-1	MS.gene038408	60S ribosomal export protein NMD3 [Medicago truncatula]	565-584	2.5
gma-miR172h-5p_R-1	MS.gene98705	probable E3 ubiquitin-protein ligase ARI7 [Medicago truncatula]	736-755	2.5
gma-miR172h-5p_R-1	MS.gene055486	serine--tRNA ligase, chloroplastic/mitochondrial isoform X1 [Medicago truncatula]	1603-1622	2
gma-miR172h-5p_R-1	MS.gene031381	trafficking protein particle complex II-specific subunit 130 homolog [Medicago truncatula]	2473-2492	2.2
gma-miR172h-5p_R-1	MS.gene63724	hypothetical protein MtrunA17_Chr2g0315531 [Medicago truncatula]	719-737	2.2
gma-miR172h-5p_R-1	MS.gene070728	uncharacterized protein LOC11406821 [Medicago truncatula]	495-515	2.5
gma-miR172h-5p_R-1	MS.gene68783	kinesin-like protein KIN-7D, mitochondrial [Medicago truncatula]	2648-2666	2.5
gma-miR172h-5p_R-1	MS.gene48936	protein GRAVITROPIC IN THE LIGHT 1 [Medicago truncatula]	471-491	2
gma-miR172h-5p_R-1	MS.gene48940	protein GRAVITROPIC IN THE LIGHT 1 [Medicago truncatula]	633-653	1
gma-miR172h-5p_R-1	MS.gene96980	protein NPGR2 [Medicago truncatula]	662-680	2.5
gma-miR172h-5p_R-1	MS.gene99754	ATP-dependent DNA helicase PIF1 [Trifolium pratense]	953-971	2.5
gma-miR172h-5p_R-1	MS.gene39049	structural maintenance of chromosomes protein 4 [Cicer arietinum]	1762-1781	2.5
gma-miR172h-5p_R-1	MS.gene47635	replication factor-A carboxy-terminal domain protein [Medicago truncatula]	1132-1151	2
gma-miR172h-5p_R-1	MS.gene28214	zinc finger, C3HC4 type (RING finger) protein [Medicago truncatula]	58-77	2.5
gma-miR172h-5p_R-1	MS.gene28225	glycine-rich RNA-binding protein 3, mitochondrial [Medicago truncatula]	997-1016	2.5
gma-miR172h-5p_R-1	MS.gene000621	uncharacterized protein LOC11433926 [Medicago truncatula]	337-356	2.2
gma-miR172h-5p_R-1	MS.gene46652	hypothetical protein MTR_3g030790 [Medicago truncatula]	19-38	2.5
gma-miR172h-5p_R-1	MS.gene46650	hypothetical protein MTR_3g030790 [Medicago truncatula]	19-38	2.5
gma-miR172h-5p_R-1	MS.gene073478	DNA replication factor CDT1-like protein [Medicago truncatula]	2263-2282	2.5
gma-miR172h-5p_R-1	MS.gene033760	xyloglucan endotransglycosylase [Medicago truncatula]	506-524	2.5
gma-miR172h-5p_R-1	MS.gene033759	xyloglucan endotransglucosylase/hydrolase 1 [Medicago truncatula]	752-770	2.5
gma-miR172h-5p_R-1	MS.gene03046	homeobox-leucine zipper protein HDG11-like [Cicer arietinum]	2050-2069	2.5
gma-miR172h-5p_R-1	MS.gene030382	UDP-N-acetylmuramyl-tripeptide synthetase [Medicago truncatula]	1279-1298	2.2
gma-miR172h-5p_R-1	MS.gene87097	non-specific lipid-transfer protein 1 [Medicago truncatula]	262-281	2.5
gma-miR172h-5p_R-1	MS.gene68189	kinesin-like protein KIN-7D, mitochondrial [Medicago truncatula]	2648-2666	2.5
gma-miR172h-5p_R-1	MS.gene95385	zinc transporter 11 [Medicago truncatula]	69-89	2.5
gma-miR172h-5p_R-1	MS.gene08048	putative minus-end-directed kinesin ATPase [Medicago truncatula]	304-323	2.2
gma-miR172h-5p_R-1	MS.gene021427	protein FAM135B isoform X1 [Medicago truncatula]	2215-2234	2
gma-miR172h-5p_R-1	MS.gene002554	hypothetical protein Ahy_A10g051175 [Arachis hypogaea]	322-341	2.5
gma-miR172h-5p_R-1	MS.gene27272	probable GTP-binding protein OBGC2 [Medicago truncatula]	101-119	2.5
gma-miR172h-5p_R-1	MS.gene04980	probable E3 ubiquitin-protein ligase ARI7 [Medicago truncatula]	730-749	2
gma-miR172h-5p_R-1	MS.gene047129	patatin-like phospholipase domain-containing protein 2 [Medicago truncatula]	1111-1130	2.2
gma-miR172h-5p_R-1	MS.gene24478	A-kinase anchor protein 17B [Medicago truncatula]	644-662	2.5
gma-miR172h-5p_R-1	MS.gene015912	uncharacterized protein LOC25481894 [Medicago truncatula]	320-338	2.5
gma-miR172h-5p_R-1	MS.gene052030	probable E3 ubiquitin-protein ligase ARI7 [Medicago truncatula]	736-755	2.5
gma-miR172h-5p_R-1	MS.gene022279	trehalose-6-phosphate synthase domain protein [Medicago truncatula]	2443-2462	2.5
gma-miR172h-5p_R-1	MS.gene053580	KH domain-containing protein HEN4 [Medicago truncatula]	281-299	2
gma-miR172h-5p_R-1	MS.gene31616	indole-3-pyruvate monooxygenase YUCCA6 [Medicago truncatula]	680-698	2.5
gma-miR172h-5p_R-1	MS.gene31625	histone-lysine N-methyltransferase ATX5 [Medicago truncatula]	514-533	2.5
gma-miR172h-5p_R-1	MS.gene31669	protein FAM135B isoform X1 [Medicago truncatula]	2215-2234	2
gma-miR172h-5p_R-1	MS.gene74115	putative pentatricopeptide repeat-containing protein At1g16830 [Medicago truncatula]	596-614	2.5
gma-miR172h-5p_R-1	MS.gene31728	transcription factor MYB3R-1 [Medicago truncatula]	2215-2234	2.5
gma-miR172h-5p_R-1	MS.gene56518	ribulose-1,5 bisphosphate carboxylase/oxygenase large subunit N-methyltransferase, chloroplastic [Medicago truncatula]	315-335	2.5
gma-miR172h-5p_R-1	MS.gene30985	ATP-dependent DNA helicase PIF1 [Trifolium pratense]	953-971	2.5
gma-miR172h-5p_R-1	MS.gene052370	ADP-ribosylation factor [Medicago truncatula]	66-86	2.5
gma-miR172h-5p_R-1	MS.gene38588	serine--tRNA ligase, chloroplastic/mitochondrial isoform X1 [Medicago truncatula]	1753-1772	2
gma-miR172h-5p_R-1	MS.gene38586	serine--tRNA ligase, chloroplastic/mitochondrial isoform X1 [Medicago truncatula]	462-481	2
gma-miR172h-5p_R-1	MS.gene012267	IQ domain-containing protein IQM1 [Medicago truncatula]	230-248	2.5
gma-miR172h-5p_R-1	MS.gene47355	replication factor-A carboxy-terminal domain protein [Trifolium pratense]	649-668	2.5
gma-miR172h-5p_R-1	MS.gene051437	exosome complex component RRP45B [Medicago truncatula]	334-353	2.5
gma-miR172h-5p_R-1	MS.gene014246	kinesin-like protein KIN-7D, mitochondrial [Medicago truncatula]	2648-2666	2.5
gma-miR172h-5p_R-1	MS.gene058318	uncharacterized protein LOC112422828 [Medicago truncatula]	514-533	2.5
gma-miR172h-5p_R-1	MS.gene011551	hypothetical protein MTR_0378s0020, partial [Medicago truncatula]	325-344	2.5
gma-miR172h-5p_R-1	MS.gene51713	uncharacterized protein LOC11417835 [Medicago truncatula]	376-395	2.5
gma-miR172h-5p_R-1	MS.gene73191	uncharacterized protein LOC25493589 [Medicago truncatula]	215-233	2.5
gma-miR172h-5p_R-1	MS.gene46404	uncharacterized protein LOC25493589 [Medicago truncatula]	260-278	2.5
gma-miR172h-5p_R-1	MS.gene011592	uncharacterized protein LOC25493589 [Medicago truncatula]	2030-2048	2.5
gma-miR172h-5p_R-1	MS.gene45836	PREDICTED: IRK-interacting protein-like [Lupinus angustifolius]	267-287	2.5
gma-miR172h-5p_R-1	MS.gene45832	protein GRAVITROPIC IN THE LIGHT 1 [Medicago truncatula]	633-653	1
gma-miR172h-5p_R-1	MS.gene93488	zinc finger, C3HC4 type (RING finger) protein [Medicago truncatula]	58-77	2.5
gma-miR172h-5p_R-1	MS.gene01536	hypothetical protein Ahy_A10g051175 [Arachis hypogaea]	322-341	2.5
gma-miR172h-5p_R-1	MS.gene001087	hypothetical protein MTR_3g030790 [Medicago truncatula]	19-38	2.5
gma-miR172h-5p_R-1	MS.gene001081	hypothetical protein MTR_3g030790 [Medicago truncatula]	19-38	2.5
gma-miR172h-5p_R-1	MS.gene001079	hypothetical protein MTR_3g030790 [Medicago truncatula]	19-38	2.5
gma-miR172h-5p_R-1	MS.gene001076	hypothetical protein MTR_3g030790 [Medicago truncatula]	19-38	2.5
gma-miR172h-5p_R-1	MS.gene001074	hypothetical protein MTR_3g030790 [Medicago truncatula]	19-38	2.5
gma-miR172h-5p_R-1	MS.gene001073	hypothetical protein MTR_3g030790 [Medicago truncatula]	19-38	2.5
gma-miR172h-5p_R-1	MS.gene001072	hypothetical protein MTR_3g030790 [Medicago truncatula]	19-38	2.5
gma-miR172h-5p_R-1	MS.gene95514	hypothetical protein MTR_3g030790 [Medicago truncatula]	19-38	2.5
gma-miR172h-5p_R-1	MS.gene95516	hypothetical protein MTR_3g030790 [Medicago truncatula]	19-38	2.5
gma-miR172h-5p_R-1	MS.gene95518	hypothetical protein MTR_3g030790 [Medicago truncatula]	19-38	2.5
gma-miR172h-5p_R-1	MS.gene01639	unknown [Medicago truncatula]	1105-1124	2.2
gma-miR172h-5p_R-1	MS.gene21876	ADP-ribosylation factor [Medicago truncatula]	66-86	2.5
gma-miR172h-5p_R-1	MS.gene71725	hypothetical protein MTR_1g016950 [Medicago truncatula]	23-41	2.5
gma-miR172h-5p_R-1	MS.gene068946	uncharacterized protein LOC25501160 [Medicago truncatula]	220-239	2.2
gma-miR172h-5p_R-1	MS.gene78354	probable E3 ubiquitin-protein ligase ARI7 [Medicago truncatula]	532-551	2.5
gma-miR172h-5p_R-1	MS.gene20243	ADP-ribosylation factor 2 [Medicago truncatula]	67-86	2
gma-miR172h-5p_R-1	MS.gene62378	WUSCHEL-related homeobox 11 isoform X1 [Medicago truncatula]	523-542	2.5
gma-miR172h-5p_R-1	MS.gene04356	putative minus-end-directed kinesin ATPase [Medicago truncatula]	304-323	2.2
gma-miR172h-5p_R-1	MS.gene041152	pentatricopeptide repeat-containing protein At3g50420 [Medicago truncatula]	1883-1901	2
gma-miR172h-5p_R-1	MS.gene047747	NEDD8-conjugating enzyme Ubc12 [Medicago truncatula]	436-455	2.5
gma-miR172h-5p_R-1	MS.gene24226	probable GTP-binding protein OBGC2 [Medicago truncatula]	101-119	2.5
gma-miR172h-5p_R-1	MS.gene00505	A-kinase anchor protein 17B [Medicago truncatula]	644-662	2.5
gma-miR172h-5p_R-1	MS.gene048739	probable E3 ubiquitin-protein ligase ARI7 [Medicago truncatula]	727-746	2
gma-miR172h-5p_R-1	MS.gene86490	jmjC domain-containing protein 7 [Medicago truncatula]	544-563	2.2
gma-miR172h-5p_R-1	MS.gene048740	putative aminoacyltransferase, E1 ubiquitin-activating enzyme [Medicago truncatula]	661-680	2.5
gma-miR172h-5p_R-1	MS.gene060481	putative transcription factor WD40-like family [Medicago truncatula]	4444-4463	2.2
gma-miR172h-5p_R-1	MS.gene72832	protein NPG1 [Medicago truncatula]	431-449	2.5
gma-miR172h-5p_R-1	MS.gene059874	trafficking protein particle complex II-specific subunit 130 homolog [Medicago truncatula]	2179-2198	2.2
gma-miR172h-5p_R-1	MS.gene069387	trafficking protein particle complex II-specific subunit 130 homolog [Medicago truncatula]	2272-2291	2.2
gma-miR172h-5p_R-1	MS.gene059873	trafficking protein particle complex II-specific subunit 130 homolog [Medicago truncatula]	2409-2428	2.2
gma-miR172h-5p_R-1	MS.gene54088	uncharacterized protein LOC25481894 [Medicago truncatula]	305-323	2.5
gma-miR172h-5p_R-1	MS.gene059871	trafficking protein particle complex II-specific subunit 130 homolog [Medicago truncatula]	1133-1152	2.2
gma-miR172h-5p_R-1	MS.gene069385	trafficking protein particle complex II-specific subunit 130 homolog [Medicago truncatula]	2473-2492	2.2
gma-miR172h-5p_R-1	MS.gene059136	indole-3-pyruvate monooxygenase YUCCA6 [Medicago truncatula]	680-698	2.5
gma-miR172h-5p_R-1	MS.gene059144	putative disease resistance RPP13-like protein 1 [Medicago truncatula]	502-521	2.5
gma-miR172h-5p_R-1	MS.gene33878	transcription factor MYB3R-1 [Medicago truncatula]	2248-2267	2.5
gma-miR172h-5p_R-1	MS.gene060213	protein GRAVITROPIC IN THE LIGHT 1 [Medicago truncatula]	755-773	2.2
gma-miR172h-5p_R-1	MS.gene074373	trehalose-6-phosphate synthase domain protein [Medicago truncatula]	2443-2462	2.5
gma-miR172h-5p_R-1	MS.gene044181	GPN-loop GTPase 3 [Medicago truncatula]	106-125	1
gma-miR172h-5p_R-1	MS.gene051877	uncharacterized protein LOC11446737 isoform X1 [Medicago truncatula]	280-299	2.5
gma-miR172h-5p_R-1	MS.gene78745	uncharacterized protein LOC25497319 [Medicago truncatula]	820-839	1.8
gma-miR172h-5p_R-1	MS.gene051854	IQ domain-containing protein IQM1 [Medicago truncatula]	230-248	2.5
gma-miR172h-5p_R-1	MS.gene53592	B3 domain-containing protein REM21 isoform X1 [Medicago truncatula]	416-434	2
gma-miR172h-5p_R-1	MS.gene58702	hypothetical protein MTR_6g077630 [Medicago truncatula]	2263-2282	2.5
gma-miR172h-5p_R-1	MS.gene017263	sister chromatid cohesion protein SCC4 [Medicago truncatula]	325-344	2.2
gma-miR172h-5p_R-1	MS.gene033145	14 kDa proline-rich protein DC2.15 [Medicago truncatula]	256-275	2.2
gma-miR172h-5p_R-1	MS.gene048252	14 kDa proline-rich protein DC2.15 [Medicago truncatula]	247-266	2.5
gma-miR172h-5p_R-1	MS.gene029769	exosome complex component RRP45B [Medicago truncatula]	442-461	2.5
gma-miR172h-5p_R-1	MS.gene063132	kinesin-like protein KIN-7D, mitochondrial [Medicago truncatula]	2648-2666	2.5
gma-miR172h-5p_R-1	MS.gene011514	14 kDa proline-rich protein DC2.15 [Medicago truncatula]	370-389	2.2
gma-miR172h-5p_R-1	MS.gene011517	14 kDa proline-rich protein DC2.15 [Medicago truncatula]	259-278	2.2
gma-miR172h-5p_R-1	MS.gene42530	structural maintenance of chromosomes protein 4 [Cicer arietinum]	1762-1781	2.5
gma-miR172h-5p_R-1	MS.gene61267	uncharacterized protein LOC25493589 [Medicago truncatula]	2069-2087	2.5
gma-miR172h-5p_R-1	MS.gene54326	hypothetical protein Ahy_A10g051175 [Arachis hypogaea]	322-341	2.5
gma-miR172h-5p_R-1	MS.gene024331	xyloglucan endotransglycosylase [Medicago truncatula]	506-524	2.5
gma-miR172h-5p_R-1	MS.gene024330	xyloglucan endotransglucosylase/hydrolase 1 [Medicago truncatula]	752-770	2.5
gma-miR172h-5p_R-1	MS.gene72279	xyloglucan endotransglycosylase [Medicago truncatula]	506-524	2.5
gma-miR172h-5p_R-1	MS.gene72278	xyloglucan endotransglucosylase/hydrolase 1 [Medicago truncatula]	752-770	2.5
gma-miR172h-5p_R-1	MS.gene72276	xyloglucan endotransglucosylase/hydrolase 1 [Medicago truncatula]	674-692	2.5
gma-miR172h-5p_R-1	MS.gene002277	replication factor-A carboxy-terminal domain protein [Medicago truncatula]	982-1001	2
gma-miR172h-5p_R-1	MS.gene024193	replication factor-A carboxy-terminal domain protein [Medicago truncatula]	1390-1409	2
gma-miR172h-5p_R-1	MS.gene002119	unknown [Medicago truncatula]	1105-1124	2.2
gma-miR172h-5p_R-1	MS.gene60587	lysine histidine transporter-like 6 [Medicago truncatula]	178-196	2.5
gma-miR172h-5p_R-1	MS.gene21749	ADP-ribosylation factor [Medicago truncatula]	66-86	2.5
gma-miR172h-5p_R-1	MS.gene032144	probable E3 ubiquitin-protein ligase ARI7 [Medicago truncatula]	736-755	2.5
gma-miR172h-5p_R-1	MS.gene25618	endonuclease/exonuclease/phosphatase family protein [Medicago truncatula]	509-527	2.5
gma-miR172h-5p_R-1	MS.gene041960	putative minus-end-directed kinesin ATPase [Medicago truncatula]	160-179	2.2
gma-miR172h-5p_R-1	MS.gene028482	KH domain-containing protein HEN4 [Medicago truncatula]	281-299	2
gma-miR172h-5p_R-1	MS.gene42746	uncharacterized protein LOC25501160 [Medicago truncatula]	220-239	2.2
gma-miR172h-5p_R-1	MS.gene09541	ADP-ribosylation factor 2 [Medicago truncatula]	67-86	2
gma-miR172h-5p_R-1	MS.gene015200	ADP-ribosylation factor 2 [Medicago truncatula]	67-86	2
gma-miR172h-5p_R-1	MS.gene09538	ADP-ribosylation factor 2 [Medicago truncatula]	67-86	2
gma-miR172h-5p_R-1	MS.gene57164	ADP-ribosylation factor 2 [Medicago truncatula]	67-86	2
gma-miR172h-5p_R-1	MS.gene015197	ADP-ribosylation factor 2 [Medicago truncatula]	67-86	2
gma-miR172h-5p_R-1	MS.gene010463	NEDD8-conjugating enzyme Ubc12 [Medicago truncatula]	436-455	2.5
gma-miR172h-5p_R-1	MS.gene88086	putative minus-end-directed kinesin ATPase [Medicago truncatula]	103-122	2.2
gma-miR172h-5p_R-1	MS.gene92956	hypothetical protein MTR_3g030790 [Medicago truncatula]	19-38	2.5
gma-miR172h-5p_R-1	MS.gene92954	hypothetical protein MTR_3g030790 [Medicago truncatula]	19-38	2.5
gma-miR172h-5p_R-1	MS.gene044915	putative pentatricopeptide repeat-containing protein At1g16830 [Medicago truncatula]	596-614	2.5
gma-miR172h-5p_R-1	MS.gene029463	alpha,alpha-trehalose-phosphate synthase [UDP-forming] 5 [Medicago truncatula]	1488-1508	2
gma-miR172h-5p_R-1	MS.gene006808	ribulose-1,5 bisphosphate carboxylase/oxygenase large subunit N-methyltransferase, chloroplastic [Medicago truncatula]	315-335	2.5
gma-miR172h-5p_R-1	MS.gene026867	protein GRAVITROPIC IN THE LIGHT 1 [Medicago truncatula]	728-746	2.2
gma-miR172h-5p_R-1	MS.gene82486	jmjC domain-containing protein 7 [Medicago truncatula]	553-572	2.2
gma-miR172h-5p_R-1	MS.gene019664	putative nucleic acid-binding protein [Medicago truncatula]	493-512	2
gma-miR172h-5p_R-1	MS.gene84985	protein NPG1 [Medicago truncatula]	431-449	2.5
gma-miR172h-5p_R-1	MS.gene27009	probable GTP-binding protein OBGC2 [Medicago truncatula]	488-506	2.5
gma-miR172h-5p_R-1	MS.gene067279	putative transcription factor WD40-like family [Medicago truncatula]	338-356	2
gma-miR172h-5p_R-1	MS.gene82007	putative transcription factor WD40-like family [Medicago truncatula]	4585-4604	2.2
gma-miR172h-5p_R-1	MS.gene051690	A-kinase anchor protein 17B [Medicago truncatula]	821-839	2.5
gma-miR172h-5p_R-1	MS.gene051643	hypothetical protein MTR_0378s0020, partial [Medicago truncatula]	325-344	2.5
gma-miR172h-5p_R-1	MS.gene86313	uncharacterized protein LOC25481894 [Medicago truncatula]	320-338	2.5
gma-miR172h-5p_R-1	MS.gene56048	indole-3-pyruvate monooxygenase YUCCA6 [Medicago truncatula]	617-635	2.5
gma-miR172h-5p_R-1	MS.gene57449	PPR containing plant-like protein [Medicago truncatula]	2563-2582	1.5
gma-miR172h-5p_R-1	MS.gene56039	histone-lysine N-methyltransferase ATX5 [Medicago truncatula]	514-533	2.5
gma-miR172h-5p_R-1	MS.gene56715	protein FAM135B isoform X1 [Medicago truncatula]	2215-2234	2
gma-miR172h-5p_R-1	MS.gene066997	transcription factor MYB3R-1 [Medicago truncatula]	2218-2237	2.5
gma-miR172h-5p_R-1	MS.gene003330	homeobox-leucine zipper protein HDG11-like [Cicer arietinum]	2050-2069	2.5
gma-miR172h-5p_R-1	MS.gene40873	serine/threonine-protein kinase dst2 isoform X2 [Medicago truncatula]	1141-1160	2.5
gma-miR172h-5p_R-1	MS.gene57627	uncharacterized protein LOC11446737 isoform X1 [Medicago truncatula]	280-299	2.5
gma-miR172h-5p_R-1	MS.gene64262	B3 domain-containing protein REM21 isoform X1 [Medicago truncatula]	416-434	2
gma-miR172h-5p_R-1	MS.gene067646	hypothetical protein TSUD_72310 [Trifolium subterraneum]	881-899	2.5
gma-miR172h-5p_R-1	MS.gene020377	DUF223 domain protein [Medicago truncatula]	214-233	2
gma-miR172h-5p_R-1	MS.gene004228	hypothetical protein Ahy_A10g051175 [Arachis hypogaea]	322-341	2.5
gma-miR172h-5p_R-1	MS.gene059205	protein GRAVITROPIC IN THE LIGHT 1 [Medicago truncatula]	633-653	1
gma-miR172h-5p_R-1	MS.gene038795	transmembrane protein, putative [Medicago truncatula]	403-422	2
gma-miR172h-5p_R-1	MS.gene014108	structural maintenance of chromosomes protein 4 [Cicer arietinum]	3814-3833	2.5
gma-miR172h-5p_R-1	MS.gene73275	uncharacterized protein LOC11414283 [Medicago truncatula]	396-416	2.5
gma-miR172h-5p_R-1	MS.gene071992	unknown [Medicago truncatula]	1105-1124	2.2
gma-miR172h-5p_R-1	MS.gene99086	sister chromatid cohesion protein SCC4 [Medicago truncatula]	214-233	2.2
gma-miR172h-5p_R-1	MS.gene71924	14 kDa proline-rich protein DC2.15 [Medicago truncatula]	370-389	2.2
gma-miR172h-5p_R-1	MS.gene71927	14 kDa proline-rich protein DC2.15 [Medicago truncatula]	259-278	2.2
gma-miR172h-5p_R-1	MS.gene72924	14 kDa proline-rich protein DC2.15 [Medicago truncatula]	247-266	2.2
gma-miR172h-5p_R-1	MS.gene62885	14 kDa proline-rich protein DC2.15 [Medicago truncatula]	247-266	2.2
gma-miR172h-5p_R-1	MS.gene62886	14 kDa proline-rich protein DC2.15 [Medicago truncatula]	259-278	2.2
gma-miR172h-5p_R-1	MS.gene035026	exosome complex component RRP45B [Medicago truncatula]	442-461	2.5
gma-miR172h-5p_R-1	MS.gene41706	replication factor-A carboxy-terminal domain protein [Medicago truncatula]	1132-1151	2
gma-miR172h-5p_R-1	MS.gene72367	uncharacterized protein LOC25493589 [Medicago truncatula]	2030-2048	2.5
gma-miR172h-5p_R-1	MS.gene054568	Pentatricopeptide repeat-containing protein At5g55840 family [Cajanus cajan]	1672-1691	2.5
gma-miR172h-5p_R-1	MS.gene034239	uncharacterized protein LOC11433926 [Medicago truncatula]	337-356	2.2
gma-miR172h-5p_R-1	MS.gene56349	hypothetical protein MTR_3g010860 [Medicago truncatula]	373-392	2.5
gma-miR172h-5p_R-1	MS.gene72130	UDP-N-acetylmuramoyl-L-alanyl-D-glutamate--2,6-diaminopimelate ligase MurE homolog, chloroplastic [Medicago truncatula]	702-721	2.2
gma-miR172h-5p_R-1	MS.gene93202	UDP-N-acetylmuramoyl-L-alanyl-D-glutamate--2,6-diaminopimelate ligase MurE homolog, chloroplastic [Medicago truncatula]	702-721	2.2
gma-miR172h-5p_R-1	MS.gene27477	non-specific lipid-transfer protein 1 [Medicago truncatula]	262-281	2.5
gma-miR172h-5p_R-1	MS.gene79416	zinc finger, C3HC4 type (RING finger) protein [Medicago truncatula]	58-77	2.5
gma-miR172h-5p_R-1	MS.gene79409	glycine-rich RNA-binding protein 3, mitochondrial [Medicago truncatula]	1090-1109	2.5
gma-miR172h-5p_R-1	MS.gene038586	putative minus-end-directed kinesin ATPase [Medicago truncatula]	103-122	2.2
gma-miR172h-5p_R-1	MS.gene92721	hypothetical protein MTR_3g030790 [Medicago truncatula]	19-38	2.5
gma-miR172h-5p_R-1	MS.gene046477	endonuclease/exonuclease/phosphatase family protein [Medicago truncatula]	479-497	2.5
gma-miR172h-5p_R-1	MS.gene024766	ADP-ribosylation factor [Medicago truncatula]	66-86	2.5
gma-miR172h-5p_R-1	MS.gene49181	putative chitinase [Medicago truncatula]	526-545	2.5
gma-miR172h-5p_R-1	MS.gene36105	uncharacterized protein LOC25501160 [Medicago truncatula]	220-239	2.2
gma-miR172h-5p_R-1	MS.gene90222	KH domain-containing protein HEN4 [Medicago truncatula]	281-299	2
gma-miR172h-5p_R-1	MS.gene047690	pentatricopeptide repeat-containing protein At3g50420 [Medicago truncatula]	1883-1901	2
gma-miR172h-5p_R-1	MS.gene89856	NEDD8-conjugating enzyme Ubc12 [Medicago truncatula]	436-455	2.5
gma-miR172h-5p_R-1	MS.gene029533	hypothetical protein MTR_3g030790 [Medicago truncatula]	19-38	2.5
gma-miR172h-5p_R-1	MS.gene029531	hypothetical protein MTR_3g030790 [Medicago truncatula]	19-38	2.5
gma-miR172h-5p_R-1	MS.gene75183	alpha,alpha-trehalose-phosphate synthase [UDP-forming] 5 [Medicago truncatula]	1488-1508	2
gma-miR172h-5p_R-1	MS.gene71778	alpha,alpha-trehalose-phosphate synthase [UDP-forming] 5 [Medicago truncatula]	1488-1508	2
gma-miR172h-5p_R-1	MS.gene94931	zinc transporter 11 [Medicago truncatula]	261-281	2.5
gma-miR172h-5p_R-1	MS.gene031479	ribulose-1,5 bisphosphate carboxylase/oxygenase large subunit N-methyltransferase, chloroplastic [Medicago truncatula]	315-335	2.5
gma-miR172h-5p_R-1	MS.gene04140	putative minus-end-directed kinesin ATPase [Medicago truncatula]	304-323	2.2
gma-miR172h-5p_R-1	MS.gene028076	putative tetratricopeptide-like helical domain-containing protein [Medicago truncatula]	431-449	2.5
gma-miR172h-5p_R-1	MS.gene068366	putative transcription factor WD40-like family [Medicago truncatula]	338-356	2
gma-miR172h-5p_R-1	MS.gene08519	putative transcription factor WD40-like family [Medicago truncatula]	4294-4313	2.2
gma-miR172h-5p_R-1	MS.gene006540	ADP-ribosylation factor [Medicago truncatula]	66-86	2.5
gma-miR172h-5p_R-1	MS.gene97518	putative pentatricopeptide repeat-containing protein At1g16830 [Medicago truncatula]	326-344	2.5
gma-miR172h-5p_R-1	MS.gene90730	probable GTP-binding protein OBGC2 [Medicago truncatula]	101-119	2.5
gma-miR172h-5p_R-1	MS.gene008286	probable E3 ubiquitin-protein ligase ARI7 [Medicago truncatula]	730-749	2
gma-miR172h-5p_R-1	MS.gene008285	putative aminoacyltransferase, E1 ubiquitin-activating enzyme [Medicago truncatula]	169-188	2.5
gma-miR172h-5p_R-1	MS.gene008281	putative aminoacyltransferase, E1 ubiquitin-activating enzyme [Medicago truncatula]	646-665	2.5
gma-miR172h-5p_R-1	MS.gene66462	A-kinase anchor protein 17B [Medicago truncatula]	644-662	2.5
gma-miR172h-5p_R-1	MS.gene054709	serine/threonine-protein kinase dst2 isoform X1 [Medicago truncatula]	1141-1160	2.5
gma-miR172h-5p_R-1	MS.gene021593	uncharacterized protein LOC25481894 [Medicago truncatula]	317-335	2.5
gma-miR172h-5p_R-1	MS.gene021583	selenoprotein H [Medicago truncatula]	310-329	2.5
gma-miR172h-5p_R-1	MS.gene053932	uncharacterized protein LOC25497319 [Medicago truncatula]	820-839	1.8
gma-miR172h-5p_R-1	MS.gene021474	indole-3-pyruvate monooxygenase YUCCA6 [Medicago truncatula]	617-635	2.5
gma-miR172h-5p_R-1	MS.gene021466	histone-lysine N-methyltransferase ATX5 [Medicago truncatula]	502-521	2.5
gma-miR172h-5p_R-1	MS.gene32420	transcription factor MYB3R-1 [Medicago truncatula]	2215-2234	2.5
gma-miR172h-5p_R-1	MS.gene70608	trehalose-6-phosphate synthase domain protein [Medicago truncatula]	2443-2462	2.5
gma-miR172h-5p_R-1	MS.gene061323	hypothetical protein MTR_0378s0020, partial [Medicago truncatula]	334-353	2.5
gma-miR172h-5p_R-1	MS.gene70743	GPN-loop GTPase 3 [Medicago truncatula]	106-125	1
gma-miR172h-5p_R-1	MS.gene009630	sister chromatid cohesion protein SCC4 [Medicago truncatula]	325-344	2.2
gma-miR172h-5p_R-1	MS.gene012292	uncharacterized protein LOC11446737 isoform X1 [Medicago truncatula]	280-299	2.5
gma-miR172h-5p_R-1	MS.gene57574	IQ domain-containing protein IQM1 [Medicago truncatula]	230-248	2.5
gma-miR172h-5p_R-1	MS.gene043048	putative polygalacturonase [Medicago truncatula]	43-62	2.5
gma-miR172h-5p_R-1	MS.gene013131	serine--tRNA ligase, chloroplastic/mitochondrial isoform X1 [Medicago truncatula]	1603-1622	2
gma-miR172h-5p_R-1	MS.gene48227	PREDICTED: IRK-interacting protein-like [Lupinus angustifolius]	267-287	2.5
gma-miR172h-5p_R-1	MS.gene48223	protein GRAVITROPIC IN THE LIGHT 1 [Medicago truncatula]	633-653	1
gma-miR172h-5p_R-1	MS.gene47452	exosome complex component RRP45B [Medicago truncatula]	442-461	2.5
gma-miR172h-5p_R-1	MS.gene67670	14 kDa proline-rich protein DC2.15 [Medicago truncatula]	256-275	2.2
gma-miR172h-5p_R-1	MS.gene58458	14 kDa proline-rich protein DC2.15 [Medicago truncatula]	256-275	2.2
gma-miR172h-5p_R-1	MS.gene43268	replication factor-A carboxy-terminal domain protein [Medicago truncatula]	1048-1067	1
gma-miR172h-5p_R-1	MS.gene058116	ADP-ribosylation factor [Medicago truncatula]	66-86	2.5
gma-miR172h-5p_R-1	MS.gene053157	Pentatricopeptide repeat-containing protein [Vitis vinifera]	244-263	2.5
gma-miR172h-5p_R-1	MS.gene52292	xyloglucan endotransglucosylase/hydrolase 1 [Medicago truncatula]	752-770	2.5
gma-miR172h-5p_R-1	MS.gene52293	xyloglucan endotransglucosylase/hydrolase 1 [Medicago truncatula]	752-770	2.5
gma-miR172h-5p_R-1	MS.gene053214	uncharacterized protein LOC11433926 [Medicago truncatula]	337-356	2.2
gma-miR172h-5p_R-1	MS.gene015204	ADP-ribosylation factor 2 [Medicago truncatula]	67-86	2
gma-miR172h-5p_R-1	MS.gene010413	pentatricopeptide repeat-containing protein At3g50420 [Medicago truncatula]	1883-1901	2
gma-miR172h-5p_R-1	MS.gene93716	disease resistance protein RPS2 [Medicago truncatula]	1630-1649	2.5
gma-miR172h-5p_R-1	MS.gene59329	NEDD8-conjugating enzyme Ubc12 [Medicago truncatula]	436-455	2.5
gma-miR172h-5p_R-1	MS.gene048816	UDP-N-acetylmuramyl-tripeptide synthetase [Medicago truncatula]	1279-1298	2.2
gma-miR172h-5p_R-1	MS.gene72712	jmjC domain-containing protein 7 [Medicago truncatula]	553-572	2.2
gma-miR172h-5p_R-1	MS.gene94533	zinc finger, C3HC4 type (RING finger) protein [Medicago truncatula]	58-77	2.5
gma-miR172h-5p_R-1	MS.gene94534	zinc finger, C3HC4 type (RING finger) protein [Medicago truncatula]	58-77	2.5
gma-miR172h-5p_R-1	MS.gene83769	hypothetical protein MTR_0378s0020, partial [Medicago truncatula]	325-344	2.5
gma-miR172h-5p_R-1	MS.gene070085	protein NPG1 [Medicago truncatula]	431-449	2.5
gma-miR172h-5p_R-1	MS.gene77945	hypothetical protein MTR_3g030790 [Medicago truncatula]	19-38	2.5
gma-miR172h-5p_R-1	MS.gene77938	hypothetical protein MTR_3g030790 [Medicago truncatula]	19-38	2.5
gma-miR172h-5p_R-1	MS.gene77934	hypothetical protein MTR_3g030790 [Medicago truncatula]	19-38	2.5
gma-miR172h-5p_R-1	MS.gene77930	hypothetical protein MTR_3g030790 [Medicago truncatula]	19-38	2.5
gma-miR172h-5p_R-1	MS.gene98075	serine/threonine-protein kinase dst2 isoform X2 [Medicago truncatula]	1141-1160	2.5
gma-miR172h-5p_R-1	MS.gene069717	uncharacterized protein LOC25501160 [Medicago truncatula]	220-239	2.2
gma-miR172h-5p_R-1	MS.gene42747	uncharacterized protein LOC25501160 [Medicago truncatula]	220-239	2.2
gma-miR172h-5p_R-1	MS.gene068023	KH domain-containing protein HEN4 [Medicago truncatula]	281-299	2
gma-miR172h-5p_R-1	MS.gene045965	uncharacterized protein LOC25497319 [Medicago truncatula]	823-842	1.8
gma-miR172h-5p_R-1	MS.gene05709	putative minus-end-directed kinesin ATPase [Medicago truncatula]	304-323	2.2
gma-miR172h-5p_R-1	MS.gene041291	putative minus-end-directed kinesin ATPase [Medicago truncatula]	144-163	2.2
gma-miR172h-5p_R-1	MS.gene048695	probable E3 ubiquitin-protein ligase ARI7 [Medicago truncatula]	730-749	2
gma-miR172h-5p_R-1	MS.gene048696	putative aminoacyltransferase, E1 ubiquitin-activating enzyme [Medicago truncatula]	207-226	2.5
gma-miR172h-5p_R-1	MS.gene048700	putative aminoacyltransferase, E1 ubiquitin-activating enzyme [Medicago truncatula]	646-665	2.5
gma-miR172h-5p_R-1	MS.gene26231	sister chromatid cohesion protein SCC4 [Medicago truncatula]	730-749	2.2
gma-miR172h-5p_R-1	MS.gene067333	putative transcription factor WD40-like family [Medicago truncatula]	4579-4598	2.2
gma-miR9749_L+1R-1	MS.gene47505	pentatricopeptide repeat-containing protein At4g16470 isoform X1 [Medicago truncatula]	529-549	2.5
gma-miR9749_L+1R-1	MS.gene25754	pentatricopeptide repeat-containing protein At3g02650, mitochondrial [Medicago truncatula]	910-930	2.2
gma-miR9749_L+1R-1	MS.gene82931	NA	104-123	2.2
gma-miR9749_L+1R-1	MS.gene074158	pentatricopeptide repeat-containing protein At4g11690 [Medicago truncatula]	1582-1602	2.2
gma-miR9749_L+1R-1	MS.gene54871	frigida-LIKE protein [Medicago truncatula]	783-803	2.5
gma-miR9749_L+1R-1	MS.gene051357	ABC transporter G family member 39 [Medicago truncatula]	799-819	2.5
gma-miR9749_L+1R-1	MS.gene007258	ABC transporter G family member 39 [Medicago truncatula]	799-819	2.5
gma-miR9749_L+1R-1	MS.gene007257	ABC transporter G family member 39 [Medicago truncatula]	799-819	2.5
gma-miR9749_L+1R-1	MS.gene039411	chaperone protein ClpB1 [Jatropha curcas]	225-246	2.5
gma-miR9749_L+1R-1	MS.gene93928	uncharacterized protein LOC25491804 [Medicago truncatula]	265-285	2
gma-miR9749_L+1R-1	MS.gene93924	putative proton-dependent oligopeptide transporter family, major facilitator superfamily [Medicago truncatula]	919-939	2
gma-miR9749_L+1R-1	MS.gene86649	pentatricopeptide (PPR) repeat protein [Medicago truncatula]	830-850	2.5
gma-miR9749_L+1R-1	MS.gene86648	pentatricopeptide (PPR) repeat protein [Medicago truncatula]	595-615	2.5
gma-miR9749_L+1R-1	MS.gene86586	hypothetical protein MtrunA17_Chr6g0472071 [Medicago truncatula]	345-365	2.5
gma-miR9749_L+1R-1	MS.gene44590	putative tRNA A64-2'-O-ribosylphosphate transferase, protein-tyrosine phosphatase, rit1 [Medicago truncatula]	103-122	2.2
gma-miR9749_L+1R-1	MS.gene44597	putative tRNA A64-2'-O-ribosylphosphate transferase, protein-tyrosine phosphatase, rit1 [Medicago truncatula]	103-122	2.2
gma-miR9749_L+1R-1	MS.gene58892	pentatricopeptide (PPR) repeat protein, partial [Medicago truncatula]	911-931	0.5
gma-miR9749_L+1R-1	MS.gene52594	putative RNA-binding protein Luc7-like 2 isoform X1 [Medicago truncatula]	352-372	2.5
gma-miR9749_L+1R-1	MS.gene053282	hypothetical protein MtrunA17_Chr4g0051491 [Medicago truncatula]	318-339	2.5
gma-miR9749_L+1R-1	MS.gene34303	hypothetical protein MtrunA17_Chr4g0051491 [Medicago truncatula]	318-339	2.5
gma-miR9749_L+1R-1	MS.gene053280	hypothetical protein MtrunA17_Chr4g0051491 [Medicago truncatula]	318-339	2.5
gma-miR9749_L+1R-1	MS.gene34349	hypothetical protein MtrunA17_Chr4g0051491 [Medicago truncatula]	318-339	2.5
gma-miR9749_L+1R-1	MS.gene34347	hypothetical protein MtrunA17_Chr4g0051491 [Medicago truncatula]	318-339	2.5
gma-miR9749_L+1R-1	MS.gene34304	hypothetical protein MTR_4g094508 [Medicago truncatula]	324-345	2.5
gma-miR9749_L+1R-1	MS.gene05925	Rho GTPase-activating protein gacA [Morus notabilis]	26-45	1.5
gma-miR9749_L+1R-1	MS.gene55438	pentatricopeptide repeat-containing protein At4g11690 [Medicago truncatula]	1582-1602	2.2
gma-miR9749_L+1R-1	MS.gene55483	RNA recognition motif [Medicago truncatula]	402-423	2.5
gma-miR9749_L+1R-1	MS.gene35151	probable disease resistance protein At5g63020 [Medicago truncatula]	1510-1530	2
gma-miR9749_L+1R-1	MS.gene33113	3-hydroxyisobutyryl-CoA hydrolase-like protein 2, mitochondrial [Medicago truncatula]	346-366	2.5
gma-miR9749_L+1R-1	MS.gene45383	hypothetical protein TSUD_113290 [Trifolium subterraneum]	176-195	2.2
gma-miR9749_L+1R-1	MS.gene31629	protein BOBBER 1 [Medicago truncatula]	223-243	2.5
gma-miR9749_L+1R-1	MS.gene008739	pentatricopeptide repeat-containing protein At4g16470 isoform X1 [Medicago truncatula]	421-441	2.5
gma-miR9749_L+1R-1	MS.gene043489	frigida-LIKE protein [Medicago truncatula]	783-803	2.5
gma-miR9749_L+1R-1	MS.gene044286	pentatricopeptide repeat-containing protein At3g02650, mitochondrial [Medicago truncatula]	910-930	2.2
gma-miR9749_L+1R-1	MS.gene026252	putative P-loop containing nucleoside triphosphate hydrolase, leucine-rich repeat domain, L [Medicago truncatula]	3505-3525	2.5
gma-miR9749_L+1R-1	MS.gene032591	uncharacterized protein LOC11430437 [Medicago truncatula]	112-131	2.2
gma-miR9749_L+1R-1	MS.gene033833	endonuclease/exonuclease/phosphatase family protein [Medicago truncatula]	478-498	2.2
gma-miR9749_L+1R-1	MS.gene47076	pentatricopeptide repeat-containing protein At4g11690 [Medicago truncatula]	1582-1602	2.2
gma-miR9749_L+1R-1	MS.gene97069	putative proton-dependent oligopeptide transporter family, major facilitator superfamily [Medicago truncatula]	424-444	2
gma-miR9749_L+1R-1	MS.gene97067	protein NRT1/ PTR FAMILY 5.10 [Medicago truncatula]	115-135	2.5
gma-miR9749_L+1R-1	MS.gene062249	CBL-interacting serine/threonine-protein kinase 4 [Medicago truncatula]	1062-1083	2.5
gma-miR9749_L+1R-1	MS.gene82966	mechanosensitive ion channel protein 10 [Medicago truncatula]	636-656	2.5
gma-miR9749_L+1R-1	MS.gene005376	enolase-phosphatase E1 [Medicago truncatula]	1093-1113	2.5
gma-miR9749_L+1R-1	MS.gene003023	light-induced protein, chloroplastic [Medicago truncatula]	229-249	2.2
gma-miR9749_L+1R-1	MS.gene063905	putative major facilitator superfamily [Medicago truncatula]	55-75	2.5
gma-miR9749_L+1R-1	MS.gene016092	3-hydroxyisobutyryl-CoA hydrolase-like protein 2, mitochondrial [Medicago truncatula]	346-366	2.5
gma-miR9749_L+1R-1	MS.gene028833	frigida-LIKE protein [Medicago truncatula]	780-800	2.5
gma-miR9749_L+1R-1	MS.gene027549	UDP-glycosyltransferase 74B1 [Medicago truncatula]	1080-1099	2.2
gma-miR9749_L+1R-1	MS.gene027548	UDP-glycosyltransferase 74B1 [Medicago truncatula]	1086-1105	2.2
gma-miR9749_L+1R-1	MS.gene44914	UDP-glycosyltransferase 74B1 [Medicago truncatula]	1086-1105	2.2
gma-miR9749_L+1R-1	MS.gene059148	protein BOBBER 1 [Medicago truncatula]	223-243	2.5
gma-miR9749_L+1R-1	MS.gene33878	transcription factor MYB3R-1 [Medicago truncatula]	2736-2755	2.2
gma-miR9749_L+1R-1	MS.gene49585	putative galactose oxidase [Medicago truncatula]	1295-1314	2.2
gma-miR9749_L+1R-1	MS.gene043007	hypothetical protein MTR_6g086760 [Medicago truncatula]	493-513	2.5
gma-miR9749_L+1R-1	MS.gene025919	hypothetical protein TanjilG_02506 [Lupinus angustifolius]	76-96	2.5
gma-miR9749_L+1R-1	MS.gene57023	pentatricopeptide repeat-containing protein at1g19720-like protein [Trifolium pratense]	3466-3486	2
gma-miR9749_L+1R-1	MS.gene69760	pentatricopeptide repeat-containing protein At3g02650, mitochondrial [Medicago truncatula]	910-930	2.2
gma-miR9749_L+1R-1	MS.gene22937	enolase-phosphatase E1 [Medicago truncatula]	1093-1113	2.5
gma-miR9749_L+1R-1	MS.gene067896	mechanosensitive ion channel protein 10 [Medicago truncatula]	636-656	2.5
gma-miR9749_L+1R-1	MS.gene07410	CBL-interacting serine/threonine-protein kinase 4 [Medicago truncatula]	1062-1083	2.5
gma-miR9749_L+1R-1	MS.gene024053	putative RNA-binding protein Luc7-like 2 isoform X1 [Medicago truncatula]	406-426	2.5
gma-miR9749_L+1R-1	MS.gene016424	putative major facilitator superfamily [Medicago truncatula]	58-78	2.5
gma-miR9749_L+1R-1	MS.gene016444	uncharacterized protein LOC112418122 isoform X2 [Medicago truncatula]	2159-2180	2.5
gma-miR9749_L+1R-1	MS.gene31394	frigida-LIKE protein [Medicago truncatula]	783-803	2.5
gma-miR9749_L+1R-1	MS.gene68301	UDP-glycosyltransferase 74B1 [Medicago truncatula]	1080-1099	2.2
gma-miR9749_L+1R-1	MS.gene36486	NB-ARC domain disease resistance protein [Medicago truncatula]	205-225	2
gma-miR9749_L+1R-1	MS.gene051489	3-hydroxyisobutyryl-CoA hydrolase-like protein 2, mitochondrial [Medicago truncatula]	346-366	2.5
gma-miR9749_L+1R-1	MS.gene55703	protein BOBBER 1 [Medicago truncatula]	223-243	2.5
gma-miR9749_L+1R-1	MS.gene066997	transcription factor MYB3R-1 [Medicago truncatula]	2706-2725	2.2
gma-miR9749_L+1R-1	MS.gene024455	hypothetical protein TSUD_347280 [Trifolium subterraneum]	76-96	2.5
gma-miR9749_L+1R-1	MS.gene53984	pentatricopeptide repeat-containing protein at1g19720-like protein [Trifolium pratense]	3520-3540	2
gma-miR9749_L+1R-1	MS.gene050346	ABC transporter G family member 39 [Medicago truncatula]	799-819	2.5
gma-miR9749_L+1R-1	MS.gene85582	CBL-interacting serine/threonine-protein kinase 4 [Medicago truncatula]	1062-1083	2.5
gma-miR9749_L+1R-1	MS.gene68253	probable disease resistance protein At5g63020 [Medicago truncatula]	2143-2163	2
gma-miR9749_L+1R-1	MS.gene033491	putative RNA-binding protein Luc7-like 2 isoform X1 [Medicago truncatula]	352-372	2.5
gma-miR9749_L+1R-1	MS.gene48605	putative proton-dependent oligopeptide transporter family, major facilitator superfamily [Medicago truncatula]	925-945	2.5
gma-miR9749_L+1R-1	MS.gene48610	uncharacterized protein LOC25491804 [Medicago truncatula]	1777-1797	2
gma-miR9749_L+1R-1	MS.gene48611	protein NRT1/ PTR FAMILY 5.10 isoform X1 [Medicago truncatula]	919-939	2
gma-miR9749_L+1R-1	MS.gene20961	enolase-phosphatase E1 [Medicago truncatula]	1093-1113	2.5
gma-miR9749_L+1R-1	MS.gene056538	mechanosensitive ion channel protein 10 [Medicago truncatula]	960-980	2.5
gma-miR9749_L+1R-1	MS.gene98143	hypothetical protein MtrunA17_Chr4g0051491 [Medicago truncatula]	315-336	2.5
gma-miR9749_L+1R-1	MS.gene046827	replication factor-A carboxy-terminal domain protein [Medicago truncatula]	146-165	2.5
gma-miR9749_L+1R-1	MS.gene066296	putative galactose oxidase [Medicago truncatula]	1295-1314	2.2
gma-miR9749_L+1R-1	MS.gene030589	putative transcription factor interactor and regulator CCHC(Zn) family [Medicago truncatula]	1067-1088	2.5
gma-miR9749_L+1R-1	MS.gene062777	uncharacterized protein LOC11422742 [Medicago truncatula]	282-303	2.5
gma-miR9749_L+1R-1	MS.gene058482	3-hydroxyisobutyryl-CoA hydrolase-like protein 2, mitochondrial [Medicago truncatula]	346-366	2.5
gma-miR9749_L+1R-1	MS.gene028306	probable disease resistance protein At5g63020 [Medicago truncatula]	1930-1950	2
gma-miR9749_L+1R-1	MS.gene009835	pentatricopeptide repeat-containing protein at1g19720-like protein [Trifolium pratense]	3244-3264	2
gma-miR9749_L+1R-1	MS.gene021461	protein BOBBER 1 [Medicago truncatula]	223-243	2.5
gma-miR9749_L+1R-1	MS.gene050636	hypothetical protein TSUD_347280 [Trifolium subterraneum]	76-96	2.5
gma-miR9749_L+1R-1	MS.gene32420	transcription factor MYB3R-1 [Medicago truncatula]	2703-2722	2.2
gma-miR9749_L+1R-1	MS.gene39596	pentatricopeptide repeat-containing protein At4g16470 isoform X1 [Medicago truncatula]	511-531	2.5
gma-miR9749_L+1R-1	MS.gene70514	pentatricopeptide repeat-containing protein At3g02650, mitochondrial [Medicago truncatula]	910-930	2.2
gma-miR9749_L+1R-1	MS.gene51142	putative RNA-binding protein Luc7-like 2 isoform X1 [Medicago truncatula]	352-372	2.5
gma-miR9749_L+1R-1	MS.gene69163	probable disease resistance protein At5g63020 [Medicago truncatula]	2143-2163	2
gma-miR9749_L+1R-1	MS.gene004886	CBL-interacting serine/threonine-protein kinase 4 [Medicago truncatula]	1062-1083	2.5
gma-miR9749_L+1R-1	MS.gene043170	uncharacterized protein LOC25491804 [Medicago truncatula]	265-285	2
gma-miR9749_L+1R-1	MS.gene043163	protein NRT1/ PTR FAMILY 5.10 isoform X1 [Medicago truncatula]	919-939	2
gma-miR9749_L+1R-1	MS.gene83419	mechanosensitive ion channel protein 10 [Medicago truncatula]	636-656	2.5
gma-miR9749_L+1R-1	MS.gene83420	mechanosensitive ion channel protein 10 [Medicago truncatula]	636-656	2.5
gma-miR9749_L+1R-1	MS.gene21085	enolase-phosphatase E1 [Medicago truncatula]	1093-1113	2.5
gma-miR9749_L+1R-1	MS.gene21354	pentatricopeptide repeat-containing protein At3g23020 [Medicago truncatula]	1834-1854	2.5
gma-miR9749_L+1R-1	MS.gene43930	UDP-glycosyltransferase 74B1 [Medicago truncatula]	1080-1099	2.2
gma-miR9749_L+1R-1	MS.gene43932	UDP-glycosyltransferase 74B1 [Medicago truncatula]	1086-1105	2.2
gma-miR9749_L+1R-1	MS.gene99015	putative galactose oxidase [Medicago truncatula]	1295-1314	2.2
gma-miR9749_L+1R-1	MS.gene034280	hypothetical protein MtrunA17_Chr4g0051491 [Medicago truncatula]	315-336	2.5
gma-miR9749_L+1R-1	MS.gene060250	uncharacterized protein LOC11409580 [Medicago truncatula]	958-978	2.2
gma-miR9749_L+1R-1	MS.gene50178	pentatricopeptide repeat-containing protein at1g19720-like protein [Trifolium pratense]	3466-3486	2
gma-miR9749_L+1R-1	MS.gene023148	putative P-loop containing nucleoside triphosphate hydrolase, leucine-rich repeat domain, L [Medicago truncatula]	520-540	2
PC-5p-12132_391	MS.gene09155	replication factor-A carboxy-terminal domain protein [Medicago truncatula]	348-366	2.5
PC-5p-12132_391	MS.gene06420	probable inactive ATP-dependent zinc metalloprotease FTSHI 4, chloroplastic [Medicago truncatula]	71-90	2.5
PC-5p-12132_391	MS.gene61724	iridoid synthase [Medicago truncatula]	426-445	2.5
PC-5p-12132_391	MS.gene041850	iridoid synthase [Medicago truncatula]	471-490	2.5
PC-5p-12132_391	MS.gene40200	rhamnogalacturonate lyase B-like protein [Medicago truncatula]	1353-1372	2
PC-5p-12132_391	MS.gene40199	rhiE, partial [Mucuna pruriens]	3864-3883	2.5
PC-5p-12132_391	MS.gene24925	pyridoxal 5'-phosphate synthase-like subunit PDX1.2 [Medicago truncatula]	83-102	2.5
PC-5p-12132_391	MS.gene07103	thiamine pyrophosphokinase 1 [Medicago truncatula]	196-214	2
PC-5p-12132_391	MS.gene29403	DUF223 domain protein [Medicago truncatula]	579-598	2
PC-5p-12132_391	MS.gene28037	LMBR1 domain-containing protein 2 homolog A [Medicago truncatula]	2076-2096	2.5
PC-5p-12132_391	MS.gene030848	LMBR1 domain-containing protein 2 homolog A [Medicago truncatula]	2004-2024	2.5
PC-5p-12132_391	MS.gene37085	LMBR1 domain-containing protein 2 homolog A [Medicago truncatula]	933-953	2.5
PC-5p-12132_391	MS.gene040345	F-box/RNI/FBD-like domain protein [Medicago truncatula]	430-449	2.5
PC-5p-12132_391	MS.gene047133	hypothetical protein TSUD_127730 [Trifolium subterraneum]	322-341	2.5
PC-5p-12132_391	MS.gene026477	putative Extensin domain-containing protein [Medicago truncatula]	1075-1093	2.5
PC-5p-12132_391	MS.gene026474	extensin-2 isoform X1 [Medicago truncatula]	1193-1213	2.5
PC-5p-12132_391	MS.gene05223	hypothetical protein MtrunA17_Chr1g0182491 [Medicago truncatula]	111-131	2.5
PC-5p-12132_391	MS.gene057770	3-oxo-Delta(4,5)-steroid 5-beta-reductase [Medicago truncatula]	471-490	2.5
PC-5p-12132_391	MS.gene043574	MLO-like protein 6 [Medicago truncatula]	1421-1440	2.5
PC-5p-12132_391	MS.gene049297	probable inactive ATP-dependent zinc metalloprotease FTSHI 4, chloroplastic [Medicago truncatula]	71-90	2.5
PC-5p-12132_391	MS.gene039106	probable BOI-related E3 ubiquitin-protein ligase 3 [Medicago truncatula]	252-271	2.5
PC-5p-12132_391	MS.gene014555	rhamnogalacturonate lyase B-like protein [Medicago truncatula]	1353-1372	2
PC-5p-12132_391	MS.gene014554	rhiE, partial [Mucuna pruriens]	3381-3400	2.5
PC-5p-12132_391	MS.gene068251	pyridoxal 5'-phosphate synthase-like subunit PDX1.2 [Medicago truncatula]	83-102	2.5
PC-5p-12132_391	MS.gene51793	F-box/LRR-repeat protein, partial [Trifolium pratense]	221-239	2.5
PC-5p-12132_391	MS.gene51795	F-box/LRR-repeat protein, partial [Trifolium pratense]	335-353	2.5
PC-5p-12132_391	MS.gene01642	hypothetical protein TSUD_127730 [Trifolium subterraneum]	322-341	2.5
PC-5p-12132_391	MS.gene01652	F-box/LRR-repeat protein [Trifolium pratense]	554-572	2.5
PC-5p-12132_391	MS.gene01651	hypothetical protein TSUD_127730 [Trifolium subterraneum]	536-554	2.5
PC-5p-12132_391	MS.gene002111	hypothetical protein TSUD_127730 [Trifolium subterraneum]	554-572	2.5
PC-5p-12132_391	MS.gene42836	MLO-like protein 6 [Medicago truncatula]	1421-1440	2.5
PC-5p-12132_391	MS.gene040917	putative Extensin domain-containing protein [Medicago truncatula]	1075-1093	2.5
PC-5p-12132_391	MS.gene040915	extensin-2 isoform X1 [Medicago truncatula]	1147-1165	2.5
PC-5p-12132_391	MS.gene051865	hypothetical protein MTR_5g089380 [Medicago truncatula]	149-168	2.5
PC-5p-12132_391	MS.gene013324	probable inactive ATP-dependent zinc metalloprotease FTSHI 4, chloroplastic [Medicago truncatula]	71-90	2.5
PC-5p-12132_391	MS.gene69112	rhamnogalacturonate lyase B-like protein [Medicago truncatula]	1143-1162	2
PC-5p-12132_391	MS.gene69113	rhiE, partial [Mucuna pruriens]	3867-3886	2.5
PC-5p-12132_391	MS.gene002116	hypothetical protein TSUD_127730 [Trifolium subterraneum]	322-341	2.5
PC-5p-12132_391	MS.gene21681	putative F-box domain, FBD domain, leucine-rich repeat domain, L domain-containing protein [Medicago truncatula]	496-515	2.5
PC-5p-12132_391	MS.gene006468	replication factor-A carboxy-terminal domain protein [Medicago truncatula]	420-438	2.5
PC-5p-12132_391	MS.gene89314	zinc finger protein 7-like [Medicago truncatula]	133-152	2.5
PC-5p-12132_391	MS.gene57331	LMBR1 domain-containing protein 2 homolog A [Medicago truncatula]	2076-2096	2.5
PC-5p-12132_391	MS.gene051333	dynamin-like protein ARC5 [Medicago truncatula]	320-339	2.5
PC-5p-12132_391	MS.gene000492	putative FBD domain, leucine-rich repeat domain, L domain-containing protein [Medicago truncatula]	124-143	2.5
PC-5p-12132_391	MS.gene000487	putative FBD domain, leucine-rich repeat domain, L domain-containing protein [Medicago truncatula]	34-53	2.5
PC-5p-12132_391	MS.gene035161	F-box/RNI/FBD-like domain protein [Medicago truncatula]	458-476	2.5
PC-5p-12132_391	MS.gene68919	F-box/RNI/FBD-like domain protein [Medicago truncatula]	458-476	2.5
PC-5p-12132_391	MS.gene57639	hypothetical protein MTR_5g089380 [Medicago truncatula]	149-168	2.5
PC-5p-12132_391	MS.gene003567	3-oxo-Delta(4,5)-steroid 5-beta-reductase [Medicago truncatula]	471-490	2.5
PC-5p-12132_391	MS.gene95351	putative Extensin domain-containing protein [Medicago truncatula]	1075-1093	2.5
PC-5p-12132_391	MS.gene95353	extensin-2 isoform X1 [Medicago truncatula]	1243-1261	2.5
PC-5p-12132_391	MS.gene22978	thiamine pyrophosphokinase 1 [Medicago truncatula]	196-214	2
PC-5p-12132_391	MS.gene53685	hypothetical protein MTR_8g446580 [Medicago truncatula]	46-65	2.5
PC-5p-12132_391	MS.gene071996	hypothetical protein TSUD_127730 [Trifolium subterraneum]	322-341	2.5
PC-5p-12132_391	MS.gene072001	F-box/LRR-repeat protein [Trifolium pratense]	559-578	2.5
PC-5p-12132_391	MS.gene61781	small RNA-binding protein 11, chloroplastic isoform X2 [Medicago truncatula]	151-171	2.5
PC-5p-12132_391	MS.gene46097	zinc finger protein 7-like [Medicago truncatula]	133-152	2.5
PC-5p-12132_391	MS.gene056294	replication factor-A carboxy-terminal domain protein [Medicago truncatula]	363-381	2.5
PC-5p-12132_391	MS.gene030847	LMBR1 domain-containing protein 2 homolog A [Medicago truncatula]	2172-2192	2.5
PC-5p-12132_391	MS.gene041223	putative FBD domain, leucine-rich repeat domain, L domain-containing protein [Medicago truncatula]	106-125	2.5
PC-5p-12132_391	MS.gene041228	putative FBD-associated F-box protein At3g50710 [Medicago truncatula]	208-227	2.5
PC-5p-12132_391	MS.gene041230	putative FBD domain, leucine-rich repeat domain, L domain-containing protein [Medicago truncatula]	124-143	2.5
PC-5p-12132_391	MS.gene041236	putative FBD domain, leucine-rich repeat domain, L domain-containing protein [Medicago truncatula]	466-485	2.5
PC-5p-12132_391	MS.gene041237	putative FBD domain, leucine-rich repeat domain, L domain-containing protein [Medicago truncatula]	466-485	2.5
PC-5p-12132_391	MS.gene041241	putative FBD-associated F-box protein At3g50710 [Medicago truncatula]	124-143	2.5
PC-5p-12132_391	MS.gene71513	replication factor-A carboxy-terminal domain protein [Medicago truncatula]	249-267	2.5
PC-5p-12132_391	MS.gene79141	putative FBD domain, leucine-rich repeat domain, L domain-containing protein [Medicago truncatula]	259-278	2.5
PC-5p-12132_391	MS.gene008408	replication factor-A carboxy-terminal domain protein [Medicago truncatula]	282-300	2.5
PC-5p-12132_391	MS.gene48579	replication factor-A carboxy-terminal domain protein [Medicago truncatula]	444-462	2.5
PC-5p-12132_391	MS.gene76920	response regulator receiver domain protein [Medicago truncatula]	1585-1604	2.5
PC-5p-12132_391	MS.gene043956	uncharacterized protein LOC11417540 [Medicago truncatula]	615-633	2.5
PC-5p-12132_391	MS.gene83012	putative Extensin domain-containing protein [Medicago truncatula]	1075-1093	2.5
PC-5p-12132_391	MS.gene83008	extensin-2 isoform X1 [Medicago truncatula]	1195-1213	2.5
PC-5p-12132_391	MS.gene012281	hypothetical protein MTR_5g089380 [Medicago truncatula]	149-168	2.5
PC-5p-12132_391	MS.gene012280	hypothetical protein MTR_5g089380 [Medicago truncatula]	149-168	2.5
PC-5p-12132_391	MS.gene06979	thiamine pyrophosphokinase 1 [Medicago truncatula]	196-214	2
PC-5p-12132_391	MS.gene062997	3-oxo-Delta(4,5)-steroid 5-beta-reductase [Medicago truncatula]	375-394	2.5
PC-5p-12132_391	MS.gene054942	probable inactive ATP-dependent zinc metalloprotease FTSHI 4, chloroplastic [Medicago truncatula]	71-90	2.5
PC-5p-12132_391	MS.gene47681	MATE efflux family protein [Medicago truncatula]	162-182	2.5
PC-5p-12132_391	MS.gene47681	MATE efflux family protein [Medicago truncatula]	75-95	2.5
PC-5p-12132_391	MS.gene43325	replication factor-A carboxy-terminal domain protein [Medicago truncatula]	444-462	2.5
PC-5p-12132_391	MS.gene43271	rhamnogalacturonate lyase B-like protein [Medicago truncatula]	1323-1342	2
PC-5p-12132_391	MS.gene024703	putative F-box domain, FBD domain, leucine-rich repeat domain, L domain-containing protein [Medicago truncatula]	489-508	2.5
PC-5p-12132_391	MS.gene42370	rhamnogalacturonate lyase B-like protein [Medicago truncatula]	1353-1372	2
PC-5p-12132_391	MS.gene42369	rhiE, partial [Mucuna pruriens]	3384-3403	2.5
PC-5p-12132_391	MS.gene33380	pyridoxal 5'-phosphate synthase-like subunit PDX1.2 [Medicago truncatula]	83-102	2.5
PC-5p-12132_391	MS.gene73073	putative disease resistance RPP13-like protein 1 [Medicago truncatula]	1486-1505	2.5
PC-5p-12132_391	MS.gene60485	small RNA-binding protein 11, chloroplastic isoform X2 [Medicago truncatula]	32-52	2.5
PC-5p-12132_391	MS.gene044593	putative FBD domain, leucine-rich repeat domain, L domain-containing protein [Medicago truncatula]	460-479	2.5
PC-5p-12132_391	MS.gene029654	F-box/RNI/FBD-like domain protein [Medicago truncatula]	458-476	2.5
PC-5p-12132_391	MS.gene92039	hypothetical protein L195_g014191 [Trifolium pratense]	1157-1175	2
PC-5p-12132_391	MS.gene030921	replication factor-A carboxy-terminal domain protein [Medicago truncatula]	546-564	2.5
PC-5p-12132_391	MS.gene04117	replication factor-A carboxy-terminal domain protein [Medicago truncatula]	333-351	2.5
PC-5p-27429_184	MS.gene041035	protein indeterminate-domain 5, chloroplastic [Medicago truncatula]	46-69	1.8
PC-5p-27429_184	MS.gene31907	protein indeterminate-domain 5, chloroplastic [Medicago truncatula]	46-69	1.8
PC-5p-27429_184	MS.gene026353	protein indeterminate-domain 5, chloroplastic [Medicago truncatula]	46-69	1.8
gma-miR4416c-5p_L-1R+1_1ss2TC	MS.gene022506	pollen-specific protein C13 [Medicago truncatula]	349-368	2.5
gma-miR4416c-5p_L-1R+1_1ss2TC	MS.gene03698	DNA ligase 1 [Medicago truncatula]	20-39	2.5
gma-miR4416c-5p_L-1R+1_1ss2TC	MS.gene35617	pollen-specific protein C13 [Medicago truncatula]	301-320	2.5
gma-miR4416c-5p_L-1R+1_1ss2TC	MS.gene69365	hypothetical protein MTR_0031s0120 [Medicago truncatula]	760-779	2.5
gma-miR4416c-5p_L-1R+1_1ss2TC	MS.gene29847	pollen-specific protein C13 [Medicago truncatula]	301-320	2.5
gma-miR4416c-5p_L-1R+1_1ss2TC	MS.gene07615	spermatogenesis-associated protein 20 [Medicago truncatula]	351-370	2
gma-miR4416c-5p_L-1R+1_1ss2TC	MS.gene07617	spermatogenesis-associated protein 20 [Medicago truncatula]	351-370	2
gma-miR4416c-5p_L-1R+1_1ss2TC	MS.gene07621	spermatogenesis-associated protein 20 [Medicago truncatula]	351-370	2
gma-miR4416c-5p_L-1R+1_1ss2TC	MS.gene07137	spermatogenesis-associated protein 20 [Medicago truncatula]	351-370	2
gma-miR4416c-5p_L-1R+1_1ss2TC	MS.gene23001	spermatogenesis-associated protein 20 [Medicago truncatula]	351-370	2
gma-miR4416c-5p_L-1R+1_1ss2TC	MS.gene36118	pollen-specific protein C13 [Medicago truncatula]	45-65	2
gma-miR4416c-5p_L-1R+1_1ss2TC	MS.gene009626	ABC transporter B family member 25, mitochondrial isoform X2 [Medicago truncatula]	475-494	2.5
gma-miR4416c-5p_L-1R+1_1ss2TC	MS.gene52350	pollen-specific protein C13 [Medicago truncatula]	349-368	2.5
gma-miR4416c-5p_L-1R+1_1ss2TC	MS.gene049768	DNA ligase 1 [Medicago truncatula]	20-39	2.5
PC-3p-74747_68	MS.gene000027	GDSL esterase/lipase At1g29670 [Medicago truncatula]	44-64	2.5
PC-3p-74747_68	MS.gene55643	histone-lysine N-methyltransferase SUVR3 [Medicago truncatula]	645-665	2.2
PC-3p-74747_68	MS.gene01410	putative anthocyanidin reductase [Medicago truncatula]	402-422	2.5
PC-3p-74747_68	MS.gene97818	GDSL esterase/lipase At1g29670 [Medicago truncatula]	44-64	2.5
PC-3p-74747_68	MS.gene41943	metacaspase-1 [Medicago truncatula]	862-881	2.5
PC-3p-74747_68	MS.gene78554	potassium channel SKOR, partial [Trifolium repens]	984-1004	2.5
PC-3p-74747_68	MS.gene017377	potassium channel SKOR isoform X1 [Medicago truncatula]	2484-2504	2.5
PC-3p-74747_68	MS.gene002430	putative anthocyanidin reductase [Medicago truncatula]	402-422	2.5
PC-3p-74747_68	MS.gene02335	putative anthocyanidin reductase [Medicago truncatula]	402-422	2.5
PC-3p-74747_68	MS.gene002429	putative anthocyanidin reductase [Medicago truncatula]	402-422	2.5
PC-3p-74747_68	MS.gene02336	unknown [Medicago truncatula]	99-119	2.5
PC-3p-74747_68	MS.gene79438	GDSL esterase/lipase At1g29670 [Medicago truncatula]	44-64	2.5
PC-3p-74747_68	MS.gene064498	potassium channel SKOR isoform X1 [Medicago truncatula]	1617-1637	2.5
PC-3p-74747_68	MS.gene82179	uncharacterized protein LOC11429698 [Medicago truncatula]	678-697	2.2
PC-3p-74747_68	MS.gene94501	GDSL esterase/lipase At1g29670 [Medicago truncatula]	44-64	2.5
PC-3p-74747_68	MS.gene26134	potassium channel SKOR isoform X1 [Medicago truncatula]	1617-1637	2.5
mtr-MIR169h-p3	MS.gene35705	DNA-binding WRKY, partial [Medicago truncatula]	836-855	2.2
mtr-MIR169h-p3	MS.gene35838	DNA-binding WRKY, partial [Medicago truncatula]	833-852	2.2
mtr-MIR169h-p3	MS.gene034348	DNA-binding WRKY, partial [Medicago truncatula]	833-852	2.2
mtr-MIR169h-p3	MS.gene35706	probable WRKY transcription factor 31 isoform X1 [Medicago truncatula]	1043-1062	2.2
mtr-MIR169h-p3	MS.gene064394	probable WRKY transcription factor 31 [Medicago truncatula]	1013-1032	2.5
mtr-MIR169h-p3	MS.gene030417	actin-depolymerizing factor 7 [Medicago truncatula]	216-235	2.5
mtr-MIR169h-p3	MS.gene059308	DNA-binding WRKY, partial [Medicago truncatula]	833-852	2.2
mtr-MIR169h-p3	MS.gene035834	probable WRKY transcription factor 31 [Medicago truncatula]	1013-1032	2.5
mtr-MIR169h-p3	MS.gene42991	Ty3/gypsy retrotransposon protein [Trifolium pratense]	1910-1929	2.5
mtr-MIR169h-p3	MS.gene67161	hypothetical protein TSUD_93410 [Trifolium subterraneum]	1827-1846	2.5
mtr-MIR169h-p3	MS.gene070322	actin-depolymerizing factor 7 [Medicago truncatula]	216-235	2.5
mtr-MIR169h-p3	MS.gene72159	actin-depolymerizing factor 7 [Medicago truncatula]	54-73	2.5
mtr-MIR169h-p3	MS.gene063227	hypothetical protein TSUD_93410 [Trifolium subterraneum]	1206-1225	2.5
mtr-MIR169h-p3	MS.gene064364	probable WRKY transcription factor 31 [Medicago truncatula]	1016-1035	2.5
mtr-MIR169h-p3	MS.gene72162	actin-depolymerizing factor 7 [Medicago truncatula]	216-235	2.5
mtr-MIR169h-p3	MS.gene048790	actin-depolymerizing factor 7 [Medicago truncatula]	216-235	2.5
mtr-miR156g-3p_1ss3TC	MS.gene035950	replication factor A protein 1 [Medicago truncatula]	270-290	2.5
mtr-miR156g-3p_1ss3TC	MS.gene010279	replication factor A protein 1 [Medicago truncatula]	270-290	2.5
PC-3p-60657_85	MS.gene47514	uncharacterized protein LOC110775811 [Spinacia oleracea]	1259-1276	2.5
PC-3p-60657_85	MS.gene031833	scarecrow-like protein 3 [Medicago truncatula]	1275-1292	2
PC-3p-60657_85	MS.gene45207	uncharacterized protein LOC11417839 [Medicago truncatula]	576-593	2
PC-3p-60657_85	MS.gene056691	putative BURP domain-containing protein [Medicago truncatula]	722-739	2
PC-3p-60657_85	MS.gene056690	putative BURP domain-containing protein [Medicago truncatula]	1517-1534	2.5
PC-3p-60657_85	MS.gene056660	dehydration-responsive RD22-like protein [Medicago truncatula]	1787-1804	2
PC-3p-60657_85	MS.gene044660	uncharacterized protein LOC11412687 [Medicago truncatula]	852-869	2.5
PC-3p-60657_85	MS.gene02577	SWI/SNF complex subunit SWI3C [Medicago truncatula]	795-812	1.5
PC-3p-60657_85	MS.gene58479	protein STRUBBELIG-RECEPTOR FAMILY 7 [Medicago truncatula]	2054-2071	2.5
PC-3p-60657_85	MS.gene013793	SWI/SNF complex subunit SWI3C [Medicago truncatula]	713-730	1.5
PC-3p-60657_85	MS.gene46271	SWI/SNF complex subunit SWI3C [Medicago truncatula]	555-572	1.5
PC-3p-60657_85	MS.gene73791	SWI/SNF complex subunit SWI3C [Medicago truncatula]	747-764	1.5
PC-3p-60657_85	MS.gene66642	Peptidase aspartic, catalytic; Polynucleotidyl transferase, Ribonuclease H fold [Medicago truncatula]	171-188	2
PC-3p-60657_85	MS.gene053275	probable xyloglucan glycosyltransferase 5 [Medicago truncatula]	1838-1855	2.5
PC-3p-60657_85	MS.gene83960	uncharacterized protein LOC25496534 [Medicago truncatula]	2662-2679	2
PC-3p-60657_85	MS.gene87310	uncharacterized protein LOC25496534 [Medicago truncatula]	2662-2679	2
PC-3p-60657_85	MS.gene021293	Peptidase aspartic, catalytic; Polynucleotidyl transferase, Ribonuclease H fold [Medicago truncatula]	171-188	2.5
PC-3p-60657_85	MS.gene055705	NBS-LRR type disease resistance protein [Medicago truncatula]	2508-2525	2.5
PC-3p-60657_85	MS.gene039789	uncharacterized protein LOC11412687 [Medicago truncatula]	852-869	2.5
PC-3p-60657_85	MS.gene052423	BURP domain-containing protein BNM2A [Medicago truncatula]	353-370	2
PC-3p-60657_85	MS.gene003141	hypothetical protein TSUD_378800 [Trifolium subterraneum]	558-575	2
PC-3p-60657_85	MS.gene00719	PREDICTED: transcription initiation factor IIF subunit alpha [Lupinus angustifolius]	1323-1340	2.5
PC-3p-60657_85	MS.gene00720	transcription initiation factor IIF subunit alpha [Medicago truncatula]	1350-1367	2.5
PC-3p-60657_85	MS.gene031099	ethylene-responsive transcription factor RAP2-12 [Medicago truncatula]	873-890	2.5
PC-3p-60657_85	MS.gene031100	ethylene-responsive transcription factor RAP2-12 [Medicago truncatula]	870-887	2.5
PC-3p-60657_85	MS.gene048487	uncharacterized protein LOC25490920 [Medicago truncatula]	3114-3131	2.5
PC-3p-60657_85	MS.gene54016	pollen receptor-like kinase 5 [Medicago truncatula]	390-407	2
PC-3p-60657_85	MS.gene03387	putative non-specific serine/threonine protein kinase [Medicago truncatula]	1304-1321	2.5
PC-3p-60657_85	MS.gene09351	putative non-specific serine/threonine protein kinase [Medicago truncatula]	1304-1321	2.5
PC-3p-60657_85	MS.gene32216	putative P-loop containing nucleoside triphosphate hydrolase, leucine-rich repeat domain, L [Medicago truncatula]	578-595	2.5
PC-3p-60657_85	MS.gene95829	uncharacterized protein LOC25496534 [Medicago truncatula]	2662-2679	2
PC-3p-60657_85	MS.gene043445	expansin-B3 [Medicago truncatula]	723-740	2.5
PC-3p-60657_85	MS.gene052305	scarecrow-like protein 3 [Medicago truncatula]	1275-1292	2
PC-3p-60657_85	MS.gene28926	scarecrow-like protein 3 [Medicago truncatula]	1257-1274	2
PC-3p-60657_85	MS.gene73790	SWI/SNF complex subunit SWI3C [Medicago truncatula]	795-812	1.5
PC-3p-60657_85	MS.gene03206	SWI/SNF complex subunit SWI3C [Medicago truncatula]	795-812	1.5
PC-3p-60657_85	MS.gene45694	putative BURP domain-containing protein [Medicago truncatula]	722-739	2
PC-3p-60657_85	MS.gene45695	putative BURP domain-containing protein [Medicago truncatula]	1517-1534	2.5
PC-3p-60657_85	MS.gene45726	dehydration-responsive RD22-like protein [Medicago truncatula]	1427-1444	2
PC-3p-60657_85	MS.gene86049	ethylene-responsive transcription factor RAP2-12 [Medicago truncatula]	507-524	2.5
PC-3p-60657_85	MS.gene49822	hypothetical protein TSUD_331750 [Trifolium subterraneum]	636-653	2.5
PC-3p-60657_85	MS.gene01948	hypothetical protein TSUD_378800 [Trifolium subterraneum]	537-554	2
PC-3p-60657_85	MS.gene003049	transcription initiation factor IIF subunit alpha [Medicago truncatula]	1350-1367	2.5
PC-3p-60657_85	MS.gene046309	nuclear transcription factor Y subunit C8 [Medicago truncatula]	1032-1049	2.5
PC-3p-60657_85	MS.gene78021	uncharacterized protein LOC25496534 [Medicago truncatula]	118-135	2
PC-3p-60657_85	MS.gene03560	protein RKD2 [Medicago truncatula]	578-595	2
PC-3p-60657_85	MS.gene028917	expansin-B3 [Medicago truncatula]	723-740	2.5
PC-3p-60657_85	MS.gene04267	naringenin,2-oxoglutarate 3-dioxygenase [Medicago truncatula]	108-125	2.5
PC-3p-60657_85	MS.gene81494	uncharacterized protein LOC25496534 [Medicago truncatula]	2662-2679	2
PC-3p-60657_85	MS.gene068607	kinesin-like protein KIN-14R isoform X2 [Medicago truncatula]	2796-2813	2.5
PC-3p-60657_85	MS.gene04401	uncharacterized protein LOC101508676 isoform X1 [Cicer arietinum]	4746-4763	2.5
PC-3p-60657_85	MS.gene008695	uncharacterized protein LOC25490920 [Medicago truncatula]	3087-3104	2.5
PC-3p-60657_85	MS.gene033791	uncharacterized protein LOC25496534 [Medicago truncatula]	373-390	2
PC-3p-60657_85	MS.gene018382	cullin-1 [Medicago truncatula]	2093-2110	2.5
PC-3p-60657_85	MS.gene040783	retrotransposon-related protein [Trifolium pratense]	2118-2135	2.5
PC-3p-60657_85	MS.gene025839	protein STRUBBELIG-RECEPTOR FAMILY 7 [Medicago truncatula]	2139-2156	2.5
PC-3p-60657_85	MS.gene56987	ubiquitin-activating enzyme E1 1 [Medicago truncatula]	615-632	2.5
PC-3p-60657_85	MS.gene017341	sucrose synthase 5 [Medicago truncatula]	2424-2441	2
PC-3p-60657_85	MS.gene30912	peroxidase 21 [Medicago truncatula]	932-949	2.5
PC-3p-60657_85	MS.gene013796	SWI/SNF complex subunit SWI3C [Medicago truncatula]	555-572	1.5
PC-3p-60657_85	MS.gene013791	SWI/SNF complex subunit SWI3C [Medicago truncatula]	555-572	1.5
PC-3p-60657_85	MS.gene36529	probable protein phosphatase 2C 38 [Medicago truncatula]	762-779	2.5
PC-3p-60657_85	MS.gene048168	PREDICTED: transcription initiation factor IIF subunit alpha [Lupinus angustifolius]	1323-1340	2.5
PC-3p-60657_85	MS.gene048169	transcription initiation factor IIF subunit alpha [Medicago truncatula]	1350-1367	2.5
PC-3p-60657_85	MS.gene013937	NBS-LRR type disease resistance protein [Medicago truncatula]	4560-4577	2.5
PC-3p-60657_85	MS.gene31480	expansin-B3 [Medicago truncatula]	723-740	2.5
PC-3p-60657_85	MS.gene030754	actin cytoskeleton-regulatory complex protein PAN1 [Medicago truncatula]	1308-1325	1.8
PC-3p-60657_85	MS.gene021532	pollen receptor-like kinase 5 [Medicago truncatula]	390-407	2
PC-3p-60657_85	MS.gene059461	pollen receptor-like kinase 5 [Medicago truncatula]	390-407	2
PC-3p-60657_85	MS.gene021777	uncharacterized protein LOC11417839 [Medicago truncatula]	576-593	2
PC-3p-60657_85	MS.gene003376	scarecrow-like protein 3 [Medicago truncatula]	1275-1292	2
PC-3p-60657_85	MS.gene024373	protein STRUBBELIG-RECEPTOR FAMILY 7 [Medicago truncatula]	2103-2120	2.5
PC-3p-60657_85	MS.gene012450	cullin-1 [Medicago truncatula]	2093-2110	2.5
PC-3p-60657_85	MS.gene012226	RNA recognition motif [Medicago truncatula]	1644-1661	2
PC-3p-60657_85	MS.gene45463	putative BURP domain-containing protein [Medicago truncatula]	722-739	2
PC-3p-60657_85	MS.gene45464	putative BURP domain-containing protein [Medicago truncatula]	1013-1030	2.5
PC-3p-60657_85	MS.gene003772	putative BURP domain-containing protein [Medicago truncatula]	1250-1267	2.5
PC-3p-60657_85	MS.gene40679	dehydration-responsive RD22-like protein [Medicago truncatula]	1745-1762	2
PC-3p-60657_85	MS.gene50207	ubiquitin-activating enzyme E1 1-like [Medicago truncatula]	615-632	2.5
PC-3p-60657_85	MS.gene02895	hypothetical protein TSUD_378800 [Trifolium subterraneum]	525-542	2
PC-3p-60657_85	MS.gene063612	sucrose synthase 5 [Medicago truncatula]	2424-2441	2
PC-3p-60657_85	MS.gene066414	NA	762-779	1.5
PC-3p-60657_85	MS.gene24577	peroxidase 21 [Medicago truncatula]	908-925	2.5
PC-3p-60657_85	MS.gene41899	NBS-LRR type disease resistance protein [Medicago truncatula]	4560-4577	2.5
PC-3p-60657_85	MS.gene039544	nuclear transcription factor Y subunit C8 [Medicago truncatula]	1032-1049	2.5
PC-3p-60657_85	MS.gene98156	probable xyloglucan glycosyltransferase 5 [Medicago truncatula]	1745-1762	2.5
PC-3p-60657_85	MS.gene018926	protein RKD2 [Medicago truncatula]	590-607	2
PC-3p-60657_85	MS.gene064333	hypothetical protein TSUD_404600 [Trifolium subterraneum]	201-218	2
PC-3p-60657_85	MS.gene94929	naringenin,2-oxoglutarate 3-dioxygenase [Medicago truncatula]	108-125	2.5
PC-3p-60657_85	MS.gene069140	kinesin-like protein KIN-14R isoform X1 [Medicago truncatula]	2799-2816	2.5
PC-3p-60657_85	MS.gene05724	uncharacterized protein LOC25490920 [Medicago truncatula]	3087-3104	2.5
PC-3p-60657_85	MS.gene45061	uncharacterized protein LOC109811316 [Cajanus cajan]	1707-1724	2.5
PC-3p-60657_85	MS.gene70345	actin cytoskeleton-regulatory complex protein PAN1 [Medicago truncatula]	1308-1325	1.8
PC-3p-60657_85	MS.gene008342	uncharacterized protein LOC112416680 [Medicago truncatula]	531-548	2.2
PC-3p-60657_85	MS.gene07886	disease resistance protein (TIR-NBS-LRR class), putative [Medicago truncatula]	1622-1639	2.5
PC-3p-60657_85	MS.gene021534	pollen receptor-like kinase 5 [Medicago truncatula]	390-407	2
PC-3p-60657_85	MS.gene057564	uncharacterized protein LOC11417839 [Medicago truncatula]	495-512	2
PC-3p-60657_85	MS.gene22763	protein STRUBBELIG-RECEPTOR FAMILY 7 [Medicago truncatula]	1893-1910	2.5
PC-3p-60657_85	MS.gene009802	ubiquitin-activating enzyme E1 1-like [Medicago truncatula]	615-632	2.5
PC-3p-60657_85	MS.gene009541	sucrose synthase 5 [Medicago truncatula]	2424-2441	2
PC-3p-60657_85	MS.gene46269	SWI/SNF complex subunit SWI3C [Medicago truncatula]	555-572	1.5
PC-3p-60657_85	MS.gene57941	cullin-1 [Medicago truncatula]	1889-1906	2.5
PC-3p-60657_85	MS.gene035516	uncharacterized protein LOC101499993 [Cicer arietinum]	351-368	2.5
PC-3p-60657_85	MS.gene50069	putative BURP domain-containing protein [Medicago truncatula]	722-739	2
PC-3p-60657_85	MS.gene003803	dehydration-responsive RD22-like protein [Medicago truncatula]	1598-1615	2
PC-3p-60657_85	MS.gene058098	Ty3/gypsy retrotransposon protein [Trifolium pratense]	2497-2514	2.5
PC-3p-60657_85	MS.gene068089	NBS-LRR type disease resistance protein [Medicago truncatula]	4560-4577	2.5
PC-3p-60657_85	MS.gene97173	nuclear transcription factor Y subunit C8 [Medicago truncatula]	1032-1049	2.5
PC-3p-60657_85	MS.gene65861	uncharacterized protein LOC11412687 [Medicago truncatula]	852-869	2.5
PC-3p-60657_85	MS.gene034264	probable xyloglucan glycosyltransferase 5 [Medicago truncatula]	1838-1855	2.5
PC-3p-60657_85	MS.gene93356	protein RKD2 [Medicago truncatula]	590-607	2
PC-3p-60657_85	MS.gene035733	uncharacterized protein LOC11444828 isoform X1 [Medicago truncatula]	1031-1048	2.5
PC-3p-60657_85	MS.gene86028	disease resistance protein RML1A isoform X2 [Medicago truncatula]	386-403	2
PC-3p-60657_85	MS.gene03966	uncharacterized protein LOC25490920 [Medicago truncatula]	3108-3125	2.5
PC-3p-60657_85	MS.gene26175	sucrose synthase 5 [Medicago truncatula]	2424-2441	2
PC-3p-60657_85	MS.gene54156	ubiquitin-activating enzyme E1 1 [Medicago truncatula]	615-632	2.5
PC-3p-58380_88	MS.gene00267	putative condensin II complex subunit H2, condensin-2 complex subunit H2 [Medicago truncatula]	341-360	2.5
PC-3p-58380_88	MS.gene063311	receptor-like protein kinase HSL1 isoform X1 [Medicago truncatula]	2352-2372	2.5
PC-3p-58380_88	MS.gene071888	putative condensin II complex subunit H2, condensin-2 complex subunit H2 [Medicago truncatula]	341-360	2.5
PC-3p-58380_88	MS.gene66422	receptor-like protein kinase HSL1 isoform X1 [Medicago truncatula]	1866-1886	2.5
PC-3p-58380_88	MS.gene056228	DNA-directed RNA polymerase [Medicago truncatula]	4843-4863	2.5
PC-3p-58380_88	MS.gene059547	receptor-like protein kinase HSL1 isoform X1 [Medicago truncatula]	2355-2375	1.5
PC-3p-58380_88	MS.gene67312	putative condensin II complex subunit H2, condensin-2 complex subunit H2 [Medicago truncatula]	341-360	2.5
PC-3p-58380_88	MS.gene016610	DNA-directed RNA polymerase [Medicago truncatula]	4843-4863	2.5
PC-3p-58380_88	MS.gene038951	putative condensin II complex subunit H2, condensin-2 complex subunit H2 [Medicago truncatula]	341-360	2.5
PC-3p-58380_88	MS.gene60118	DNA-directed RNA polymerase [Medicago truncatula]	4843-4863	2.5
gra-MIR8782-p3_2ss13TC17CT	MS.gene47579	isoflavone-7-O-methyltransferase [Medicago truncatula]	195-212	1.8
gra-MIR8782-p3_2ss13TC17CT	MS.gene69288	rop guanine nucleotide exchange factor 5 [Medicago truncatula]	1180-1197	2.2
gra-MIR8782-p3_2ss13TC17CT	MS.gene73470	sulfhydryl oxidase 2 isoform X1 [Medicago truncatula]	446-463	2.5
gra-MIR8782-p3_2ss13TC17CT	MS.gene47533	putative formin, FH2 domain-containing protein [Medicago truncatula]	2342-2359	2.5
gra-MIR8782-p3_2ss13TC17CT	MS.gene47528	probable phosphoinositide phosphatase SAC9 [Medicago truncatula]	5288-5305	2.5
gra-MIR8782-p3_2ss13TC17CT	MS.gene73436	zinc finger CCCH domain-containing protein 15 [Medicago truncatula]	1019-1036	2.5
gra-MIR8782-p3_2ss13TC17CT	MS.gene69220	hypothetical protein MTR_2g017850 [Medicago truncatula]	691-708	1.8
gra-MIR8782-p3_2ss13TC17CT	MS.gene029425	uncharacterized protein LOC112418629 [Medicago truncatula]	2396-2413	2
gra-MIR8782-p3_2ss13TC17CT	MS.gene048017	probable pectinesterase/pectinesterase inhibitor 7 isoform X1 [Medicago truncatula]	457-474	2
gra-MIR8782-p3_2ss13TC17CT	MS.gene39868	hypothetical protein MTR_0303s0010, partial [Medicago truncatula]	322-339	1.8
gra-MIR8782-p3_2ss13TC17CT	MS.gene062442	protein FAR1-related sequence 5-like [Trifolium pratense]	627-644	2.5
gra-MIR8782-p3_2ss13TC17CT	MS.gene21196	Ulp1 protease family, carboxy-terminal domain protein [Medicago truncatula]	180-197	2.5
gra-MIR8782-p3_2ss13TC17CT	MS.gene001593	Ulp1 protease family, carboxy-terminal domain protein [Medicago truncatula]	1009-1026	2.5
gra-MIR8782-p3_2ss13TC17CT	MS.gene64160	Ulp1 protease family, carboxy-terminal domain protein [Medicago truncatula]	1029-1046	2.5
gra-MIR8782-p3_2ss13TC17CT	MS.gene042944	Ulp1 protease family, carboxy-terminal domain protein [Medicago truncatula]	180-197	2.5
gra-MIR8782-p3_2ss13TC17CT	MS.gene001653	Ulp1 protease family, carboxy-terminal domain protein [Medicago truncatula]	228-245	2.5
gra-MIR8782-p3_2ss13TC17CT	MS.gene048016	probable pectinesterase/pectinesterase inhibitor 7 isoform X1 [Medicago truncatula]	457-474	2
gra-MIR8782-p3_2ss13TC17CT	MS.gene005572	probable pectinesterase/pectinesterase inhibitor 7 isoform X1 [Medicago truncatula]	667-684	2
gra-MIR8782-p3_2ss13TC17CT	MS.gene96794	G-type lectin S-receptor-like serine/threonine-protein kinase At4g27290 [Medicago truncatula]	1639-1656	2.2
gra-MIR8782-p3_2ss13TC17CT	MS.gene98993	putative pectinesterase [Medicago truncatula]	682-699	2.5
gra-MIR8782-p3_2ss13TC17CT	MS.gene031608	Ulp1 protease family, carboxy-terminal domain protein [Medicago truncatula]	1221-1238	2.5
gra-MIR8782-p3_2ss13TC17CT	MS.gene90851	hypothetical protein MTR_2g020400 [Medicago truncatula]	230-247	2.5
gra-MIR8782-p3_2ss13TC17CT	MS.gene022410	vignain [Medicago truncatula]	627-644	2
gra-MIR8782-p3_2ss13TC17CT	MS.gene031634	hypothetical protein MTR_2g020400 [Medicago truncatula]	143-160	2.5
gra-MIR8782-p3_2ss13TC17CT	MS.gene031734	hypothetical protein MTR_2g017850 [Medicago truncatula]	583-600	1.8
gra-MIR8782-p3_2ss13TC17CT	MS.gene038346	ribonuclease H, partial [Trifolium pratense]	185-202	2.2
gra-MIR8782-p3_2ss13TC17CT	MS.gene85938	transcription factor bHLH25 [Medicago truncatula]	313-330	2.5
gra-MIR8782-p3_2ss13TC17CT	MS.gene038415	peptide methionine sulfoxide reductase A1 isoform X1 [Medicago truncatula]	599-616	2.5
gra-MIR8782-p3_2ss13TC17CT	MS.gene36232	nuclear pore complex protein NUP93A [Medicago truncatula]	1240-1257	2
gra-MIR8782-p3_2ss13TC17CT	MS.gene003508	hypothetical protein Ahy_A03g016453 isoform A [Arachis hypogaea]	887-904	2.5
gra-MIR8782-p3_2ss13TC17CT	MS.gene001192	hypothetical protein TSUD_397840 [Trifolium subterraneum]	92-109	2.5
gra-MIR8782-p3_2ss13TC17CT	MS.gene066867	hypothetical protein MTR_1982s0010 [Medicago truncatula]	405-422	1.8
gra-MIR8782-p3_2ss13TC17CT	MS.gene042948	Ulp1 protease family, carboxy-terminal domain protein [Medicago truncatula]	180-197	2.5
gra-MIR8782-p3_2ss13TC17CT	MS.gene042947	Ulp1 protease family, carboxy-terminal domain protein [Medicago truncatula]	567-584	2.5
gra-MIR8782-p3_2ss13TC17CT	MS.gene57654	Ulp1 protease family, carboxy-terminal domain protein [Medicago truncatula]	1110-1127	2.5
gra-MIR8782-p3_2ss13TC17CT	MS.gene40584	Ulp1 protease family, carboxy-terminal domain protein [Medicago truncatula]	1110-1127	2.5
gra-MIR8782-p3_2ss13TC17CT	MS.gene026816	Ulp1 protease family, carboxy-terminal domain protein [Medicago truncatula]	426-443	2.5
gra-MIR8782-p3_2ss13TC17CT	MS.gene045819	putative nepenthesin [Medicago truncatula]	724-741	2.5
gra-MIR8782-p3_2ss13TC17CT	MS.gene80785	putative nepenthesin [Medicago truncatula]	1003-1020	2.5
gra-MIR8782-p3_2ss13TC17CT	MS.gene81497	putative nepenthesin [Medicago truncatula]	1003-1020	2.5
gra-MIR8782-p3_2ss13TC17CT	MS.gene045822	hypothetical protein MTR_1982s0010 [Medicago truncatula]	621-638	2.2
gra-MIR8782-p3_2ss13TC17CT	MS.gene056655	E3 ubiquitin-protein ligase ARI3, putative [Medicago truncatula]	1130-1147	2.5
gra-MIR8782-p3_2ss13TC17CT	MS.gene02563	uncharacterized protein LOC112416561 [Medicago truncatula]	4670-4687	2.5
gra-MIR8782-p3_2ss13TC17CT	MS.gene055590	AP2-like ethylene-responsive transcription factor PLT2 [Medicago truncatula]	620-637	2
gra-MIR8782-p3_2ss13TC17CT	MS.gene54655	uncharacterized protein LOC25495205 [Medicago truncatula]	149-166	2
gra-MIR8782-p3_2ss13TC17CT	MS.gene055834	Ulp1 protease family, carboxy-terminal domain protein [Medicago truncatula]	1176-1193	2.5
gra-MIR8782-p3_2ss13TC17CT	MS.gene35750	equilibrative nucleotide transporter 3 [Medicago truncatula]	105-122	2.5
gra-MIR8782-p3_2ss13TC17CT	MS.gene025521	structural constituent of ribosome protein, putative [Medicago truncatula]	853-870	2.5
gra-MIR8782-p3_2ss13TC17CT	MS.gene03765	AT-hook motif nuclear-localized protein 9 [Medicago truncatula]	804-821	2.5
gra-MIR8782-p3_2ss13TC17CT	MS.gene66787	fatty acyl-CoA reductase 3 [Medicago truncatula]	623-640	1.8
gra-MIR8782-p3_2ss13TC17CT	MS.gene35376	unknown [Medicago truncatula]	29-46	2.2
gra-MIR8782-p3_2ss13TC17CT	MS.gene055542	ADP-ribosylation factor GTPase-activating protein AGD1 isoform X1 [Medicago truncatula]	675-692	2.5
gra-MIR8782-p3_2ss13TC17CT	MS.gene019928	glutathione reductase, cytosolic [Medicago truncatula]	1250-1267	1.8
gra-MIR8782-p3_2ss13TC17CT	MS.gene24638	sulfite exporter TauE/SafE family protein [Medicago truncatula]	665-682	2.2
gra-MIR8782-p3_2ss13TC17CT	MS.gene019840	putative non-specific serine/threonine protein kinase [Medicago truncatula]	2301-2318	2.5
gra-MIR8782-p3_2ss13TC17CT	MS.gene85748	hypothetical protein MTR_2g017850 [Medicago truncatula]	691-708	1.8
gra-MIR8782-p3_2ss13TC17CT	MS.gene031386	white-brown-complex ABC transporter family protein [Medicago truncatula]	359-376	2.5
gra-MIR8782-p3_2ss13TC17CT	MS.gene025044	hypothetical protein MTR_0303s0010, partial [Medicago truncatula]	637-654	2.2
gra-MIR8782-p3_2ss13TC17CT	MS.gene71324	uncharacterized protein LOC25487276 isoform X2 [Medicago truncatula]	542-559	2
gra-MIR8782-p3_2ss13TC17CT	MS.gene062591	hypothetical protein MTR_2g017850 [Medicago truncatula]	496-513	2.2
gra-MIR8782-p3_2ss13TC17CT	MS.gene40583	Ulp1 protease family, carboxy-terminal domain protein [Medicago truncatula]	1110-1127	2.5
gra-MIR8782-p3_2ss13TC17CT	MS.gene072840	two-component response regulator ARR12 [Medicago truncatula]	428-445	2.5
gra-MIR8782-p3_2ss13TC17CT	MS.gene054172	hypothetical protein MTR_2g017850 [Medicago truncatula]	211-228	2.2
gra-MIR8782-p3_2ss13TC17CT	MS.gene90280	copper-transporting ATPase PAA1, chloroplastic [Medicago truncatula]	648-665	2.5
gra-MIR8782-p3_2ss13TC17CT	MS.gene039201	hypothetical protein MTR_0303s0010, partial [Medicago truncatula]	394-411	1.8
gra-MIR8782-p3_2ss13TC17CT	MS.gene60054	hypothetical protein MTR_0303s0010, partial [Medicago truncatula]	595-612	1.8
gra-MIR8782-p3_2ss13TC17CT	MS.gene04716	putative pentacotripeptide-repeat region of PROPR [Medicago truncatula]	58-75	2.5
gra-MIR8782-p3_2ss13TC17CT	MS.gene60053	hypothetical protein MTR_2g017850 [Medicago truncatula]	613-630	1.8
gra-MIR8782-p3_2ss13TC17CT	MS.gene42300	papain family cysteine protease [Medicago truncatula]	724-741	1.8
gra-MIR8782-p3_2ss13TC17CT	MS.gene42423	papain family cysteine protease [Medicago truncatula]	724-741	1.8
gra-MIR8782-p3_2ss13TC17CT	MS.gene42262	uncharacterized protein LOC11426828 isoform X1 [Medicago truncatula]	374-391	2
gra-MIR8782-p3_2ss13TC17CT	MS.gene89146	hypothetical protein TSUD_60540 [Trifolium subterraneum]	896-913	2
gra-MIR8782-p3_2ss13TC17CT	MS.gene77603	putative DNA topoisomerase (ATP-hydrolyzing) [Medicago truncatula]	1036-1053	2.5
gra-MIR8782-p3_2ss13TC17CT	MS.gene60951	putative transcription factor C2H2 family [Medicago truncatula]	641-658	2.5
gra-MIR8782-p3_2ss13TC17CT	MS.gene97905	hypothetical protein MTR_2g017850 [Medicago truncatula]	313-330	2
gra-MIR8782-p3_2ss13TC17CT	MS.gene019841	putative non-specific serine/threonine protein kinase [Medicago truncatula]	2001-2018	2.5
gra-MIR8782-p3_2ss13TC17CT	MS.gene67300	receptor-like protein [Medicago truncatula]	204-221	2.5
gra-MIR8782-p3_2ss13TC17CT	MS.gene52852	DNA mismatch repair protein MLH1 [Medicago truncatula]	786-803	2.5
gra-MIR8782-p3_2ss13TC17CT	MS.gene058794	DNA mismatch repair protein MLH1 [Medicago truncatula]	1602-1619	2.5
gra-MIR8782-p3_2ss13TC17CT	MS.gene52854	DNA mismatch repair protein MLH1 [Medicago truncatula]	118-135	2.5
gra-MIR8782-p3_2ss13TC17CT	MS.gene52850	DNA mismatch repair protein MLH1 [Medicago truncatula]	1501-1518	2.5
gra-MIR8782-p3_2ss13TC17CT	MS.gene058795	DNA mismatch repair protein MLH1 [Medicago truncatula]	1900-1917	2.5
gra-MIR8782-p3_2ss13TC17CT	MS.gene76981	hypothetical protein MTR_2g017850 [Medicago truncatula]	382-399	1.8
gra-MIR8782-p3_2ss13TC17CT	MS.gene75831	Ulp1 protease family, carboxy-terminal domain protein [Medicago truncatula]	1176-1193	2.5
gra-MIR8782-p3_2ss13TC17CT	MS.gene042897	zinc-finger of monoamine-oxidase A repressor R1 [Medicago truncatula]	257-274	2.5
gra-MIR8782-p3_2ss13TC17CT	MS.gene042919	UV-B-induced protein At3g17800, chloroplastic [Medicago truncatula]	821-838	2
gra-MIR8782-p3_2ss13TC17CT	MS.gene046222	PPR containing protein, putative [Medicago truncatula]	185-202	2.5
gra-MIR8782-p3_2ss13TC17CT	MS.gene046202	LRR and NB-ARC domain disease resistance protein [Medicago truncatula]	1606-1623	2.5
gra-MIR8782-p3_2ss13TC17CT	MS.gene046190	Ulp1 protease family, carboxy-terminal domain protein [Medicago truncatula]	1176-1193	2.5
gra-MIR8782-p3_2ss13TC17CT	MS.gene033583	subtilisin-like protease Glyma18g48580 [Medicago truncatula]	23-40	2
gra-MIR8782-p3_2ss13TC17CT	MS.gene033582	subtilisin-like protease Glyma18g48580 [Medicago truncatula]	1277-1294	2
gra-MIR8782-p3_2ss13TC17CT	MS.gene033564	PREDICTED: E3 ubiquitin-protein ligase RGLG2-like [Vigna angularis]	530-547	2.5
gra-MIR8782-p3_2ss13TC17CT	MS.gene57831	probable metal-nicotianamine transporter YSL7 [Medicago truncatula]	386-403	2.2
gra-MIR8782-p3_2ss13TC17CT	MS.gene57791	hypothetical protein TSUD_397840 [Trifolium subterraneum]	725-742	2
gra-MIR8782-p3_2ss13TC17CT	MS.gene037066	transcription factor bHLH35 isoform X1 [Medicago truncatula]	296-313	2
gra-MIR8782-p3_2ss13TC17CT	MS.gene037065	transcription factor bHLH35 isoform X1 [Medicago truncatula]	296-313	2
gra-MIR8782-p3_2ss13TC17CT	MS.gene58913	beta-glucosidase 44 [Medicago truncatula]	1320-1337	2.5
gra-MIR8782-p3_2ss13TC17CT	MS.gene52230	ribonuclease H, partial [Trifolium pratense]	326-343	2.2
gra-MIR8782-p3_2ss13TC17CT	MS.gene00142	serine hydroxymethyltransferase 3, chloroplastic [Cicer arietinum]	335-352	2.5
gra-MIR8782-p3_2ss13TC17CT	MS.gene05928	hypothetical protein MTR_2g020400 [Medicago truncatula]	482-499	2.5
gra-MIR8782-p3_2ss13TC17CT	MS.gene00061	probable WRKY transcription factor 14 [Medicago truncatula]	1144-1161	2.5
gra-MIR8782-p3_2ss13TC17CT	MS.gene20190	hypothetical protein L195_g001543 [Trifolium pratense]	1535-1552	2.5
gra-MIR8782-p3_2ss13TC17CT	MS.gene045883	G-type lectin S-receptor-like serine/threonine-protein kinase SD1-13 [Medicago truncatula]	2557-2574	2
gra-MIR8782-p3_2ss13TC17CT	MS.gene055050	hypothetical protein L195_g010179, partial [Trifolium pratense]	203-220	2.2
gra-MIR8782-p3_2ss13TC17CT	MS.gene055099	uncharacterized protein LOC106780099 [Vigna radiata var. radiata]	664-681	2
gra-MIR8782-p3_2ss13TC17CT	MS.gene89386	calmodulin-domain kinase CDPK protein [Medicago truncatula]	328-345	2.5
gra-MIR8782-p3_2ss13TC17CT	MS.gene89381	hypothetical protein MTR_2g017850 [Medicago truncatula]	700-717	1.8
gra-MIR8782-p3_2ss13TC17CT	MS.gene055156	RopGEF7a [Medicago truncatula]	1192-1209	2.2
gra-MIR8782-p3_2ss13TC17CT	MS.gene56728	P-loop nucleoside triphosphate hydrolase superfamily protein [Medicago truncatula]	437-454	2.5
gra-MIR8782-p3_2ss13TC17CT	MS.gene030973	hypothetical protein MTR_2g017850 [Medicago truncatula]	601-618	1.8
gra-MIR8782-p3_2ss13TC17CT	MS.gene019154	hypothetical protein MTR_2g017850 [Medicago truncatula]	322-339	1.8
gra-MIR8782-p3_2ss13TC17CT	MS.gene49747	E3 ubiquitin-protein ligase CHFR isoform X2 [Medicago truncatula]	1296-1313	2
gra-MIR8782-p3_2ss13TC17CT	MS.gene063707	Ulp1 protease family, carboxy-terminal domain protein [Medicago truncatula]	1110-1127	2.5
gra-MIR8782-p3_2ss13TC17CT	MS.gene063702	Ulp1 protease family, carboxy-terminal domain protein [Medicago truncatula]	1176-1193	2.5
gra-MIR8782-p3_2ss13TC17CT	MS.gene49686	hypothetical protein L195_g001543 [Trifolium pratense]	1535-1552	2.5
gra-MIR8782-p3_2ss13TC17CT	MS.gene002825	calcium-binding protein 39 isoform X1 [Medicago truncatula]	901-918	2
gra-MIR8782-p3_2ss13TC17CT	MS.gene21997	endonuclease/exonuclease/phosphatase family protein [Medicago truncatula]	64-81	2.5
gra-MIR8782-p3_2ss13TC17CT	MS.gene28405	uncharacterized protein LOC11436750 isoform X1 [Medicago truncatula]	35-52	2.5
gra-MIR8782-p3_2ss13TC17CT	MS.gene002749	putative uncharacterized protein DDB_G0270496 isoform X2 [Medicago truncatula]	215-232	2.5
gra-MIR8782-p3_2ss13TC17CT	MS.gene45895	uncharacterized protein LOC25498365 [Medicago truncatula]	1912-1929	2.5
gra-MIR8782-p3_2ss13TC17CT	MS.gene46194	G-type lectin S-receptor-like serine/threonine-protein kinase At1g11300 [Medicago truncatula]	1369-1386	2.5
gra-MIR8782-p3_2ss13TC17CT	MS.gene45888	uncharacterized protein LOC25498365 [Medicago truncatula]	4921-4938	2.5
gra-MIR8782-p3_2ss13TC17CT	MS.gene45887	G-type lectin S-receptor-like serine/threonine-protein kinase At1g11300 [Medicago truncatula]	1618-1635	2.5
gra-MIR8782-p3_2ss13TC17CT	MS.gene45885	G-type lectin S-receptor-like serine/threonine-protein kinase At1g11300 isoform X1 [Medicago truncatula]	1597-1614	2.5
gra-MIR8782-p3_2ss13TC17CT	MS.gene37154	hypothetical protein TSUD_276540 [Trifolium subterraneum]	48-65	2.5
gra-MIR8782-p3_2ss13TC17CT	MS.gene37152	uncharacterized protein LOC112422609 [Medicago truncatula]	48-65	2
gra-MIR8782-p3_2ss13TC17CT	MS.gene84434	histone-lysine N-methyltransferase [Medicago truncatula]	85-102	2.5
gra-MIR8782-p3_2ss13TC17CT	MS.gene002523	probable leucine-rich repeat receptor-like protein kinase At5g49770 [Medicago truncatula]	2688-2705	2.5
gra-MIR8782-p3_2ss13TC17CT	MS.gene66192	eukaryotic translation initiation factor 5b-like protein [Trifolium pratense]	692-709	2.5
gra-MIR8782-p3_2ss13TC17CT	MS.gene55457	RNA polymerase II subunit A C-terminal domain phosphatase [Medicago truncatula]	994-1011	2.2
gra-MIR8782-p3_2ss13TC17CT	MS.gene27112	Fanconi anemia group J protein homolog isoform X2 [Medicago truncatula]	968-985	2
gra-MIR8782-p3_2ss13TC17CT	MS.gene55557	hypothetical protein MTR_2g017850 [Medicago truncatula]	373-390	2.2
gra-MIR8782-p3_2ss13TC17CT	MS.gene55558	hypothetical protein MTR_2g017850 [Medicago truncatula]	346-363	2.2
gra-MIR8782-p3_2ss13TC17CT	MS.gene93233	uncharacterized protein LOC112420368 [Medicago truncatula]	878-895	2
gra-MIR8782-p3_2ss13TC17CT	MS.gene02278	receptor-like serine/threonine-protein kinase SD1-8 [Medicago truncatula]	1408-1425	2
gra-MIR8782-p3_2ss13TC17CT	MS.gene08067	B3 domain-containing protein At3g18960 [Medicago truncatula]	476-493	2.5
gra-MIR8782-p3_2ss13TC17CT	MS.gene93264	hypothetical protein TSUD_81430 [Trifolium subterraneum]	512-529	2.5
gra-MIR8782-p3_2ss13TC17CT	MS.gene08092	hypothetical protein MTR_2g017850 [Medicago truncatula]	691-708	1.8
gra-MIR8782-p3_2ss13TC17CT	MS.gene08119	alpha-glucan phosphorylase, H isozyme [Medicago truncatula]	1726-1743	2.5
gra-MIR8782-p3_2ss13TC17CT	MS.gene87124	hypothetical protein MTR_2g017850 [Medicago truncatula]	322-339	1.8
gra-MIR8782-p3_2ss13TC17CT	MS.gene01181	ICE-like protease (caspase) p20 domain protein [Medicago truncatula]	421-438	2.2
gra-MIR8782-p3_2ss13TC17CT	MS.gene87142	hypothetical protein MTR_2g017850 [Medicago truncatula]	361-378	1.8
gra-MIR8782-p3_2ss13TC17CT	MS.gene023408	hypothetical protein MTR_0019s0170 [Medicago truncatula]	524-541	2.5
gra-MIR8782-p3_2ss13TC17CT	MS.gene67036	glutathione reductase, cytosolic [Medicago truncatula]	1250-1267	1.8
gra-MIR8782-p3_2ss13TC17CT	MS.gene048487	uncharacterized protein LOC25490920 [Medicago truncatula]	3160-3177	2.5
gra-MIR8782-p3_2ss13TC17CT	MS.gene035091	alkane hydroxylase MAH1 [Medicago truncatula]	367-384	2.5
gra-MIR8782-p3_2ss13TC17CT	MS.gene24441	hypothetical protein TSUD_299330 [Trifolium subterraneum]	563-580	2.5
gra-MIR8782-p3_2ss13TC17CT	MS.gene34997	putative glutamate decarboxylase [Medicago truncatula]	546-563	2.2
gra-MIR8782-p3_2ss13TC17CT	MS.gene03289	putative alpha crystallin/Hsp20 domain-containing protein [Medicago truncatula]	5174-5191	2.5
gra-MIR8782-p3_2ss13TC17CT	MS.gene86661	hypothetical protein MTR_2g020400 [Medicago truncatula]	305-322	2.5
gra-MIR8782-p3_2ss13TC17CT	MS.gene86661	hypothetical protein MTR_2g020400 [Medicago truncatula]	263-280	2.5
gra-MIR8782-p3_2ss13TC17CT	MS.gene33067	ethylene-responsive transcription factor ERF018 [Medicago truncatula]	185-202	1.5
gra-MIR8782-p3_2ss13TC17CT	MS.gene33070	putative transcription factor AP2-EREBP family [Medicago truncatula]	215-232	2.5
gra-MIR8782-p3_2ss13TC17CT	MS.gene83574	transcription factor bHLH25 [Medicago truncatula]	310-327	2.5
gra-MIR8782-p3_2ss13TC17CT	MS.gene03384	DUF4283 domain protein [Medicago truncatula]	1081-1098	2.2
gra-MIR8782-p3_2ss13TC17CT	MS.gene008423	KH domain-containing protein At3g08620 isoform X1 [Medicago truncatula]	718-735	2.5
gra-MIR8782-p3_2ss13TC17CT	MS.gene55669	putative oligopeptide transporter, OPT superfamily [Medicago truncatula]	326-343	2.2
gra-MIR8782-p3_2ss13TC17CT	MS.gene74100	hypothetical protein MTR_2g017850 [Medicago truncatula]	289-306	1.8
gra-MIR8782-p3_2ss13TC17CT	MS.gene35021	copper-transporting ATPase PAA1, chloroplastic [Medicago truncatula]	648-665	2.5
gra-MIR8782-p3_2ss13TC17CT	MS.gene60246	pleiotropic drug resistance protein 1 [Medicago truncatula]	646-663	2.5
gra-MIR8782-p3_2ss13TC17CT	MS.gene015914	protein starmaker [Medicago truncatula]	572-589	2.5
gra-MIR8782-p3_2ss13TC17CT	MS.gene001972	uncharacterized protein LOC112418629 [Medicago truncatula]	2459-2476	2
gra-MIR8782-p3_2ss13TC17CT	MS.gene008113	rop guanine nucleotide exchange factor 5 [Medicago truncatula]	1189-1206	2.2
gra-MIR8782-p3_2ss13TC17CT	MS.gene32193	ribosomal RNA-processing protein 17 [Medicago truncatula]	164-181	2.5
gra-MIR8782-p3_2ss13TC17CT	MS.gene31631	probable pectinesterase/pectinesterase inhibitor 61 [Medicago truncatula]	1406-1423	2.5
gra-MIR8782-p3_2ss13TC17CT	MS.gene31631	probable pectinesterase/pectinesterase inhibitor 61 [Medicago truncatula]	775-792	2.2
gra-MIR8782-p3_2ss13TC17CT	MS.gene31634	uncharacterized protein LOC11429788 [Medicago truncatula]	2011-2028	2.5
gra-MIR8782-p3_2ss13TC17CT	MS.gene008008	hypothetical protein DVH24_022907 [Malus domestica]	1467-1484	2
gra-MIR8782-p3_2ss13TC17CT	MS.gene54543	uncharacterized protein LOC11429788 [Medicago truncatula]	2019-2036	2.5
gra-MIR8782-p3_2ss13TC17CT	MS.gene018441	hypothetical protein MTR_0303s0010, partial [Medicago truncatula]	595-612	1.8
gra-MIR8782-p3_2ss13TC17CT	MS.gene018442	hypothetical protein MTR_0303s0010, partial [Medicago truncatula]	613-630	1.8
gra-MIR8782-p3_2ss13TC17CT	MS.gene018443	hypothetical protein MTR_0303s0010, partial [Medicago truncatula]	595-612	1.8
gra-MIR8782-p3_2ss13TC17CT	MS.gene018465	hypothetical protein MTR_2g017850 [Medicago truncatula]	682-699	1.8
gra-MIR8782-p3_2ss13TC17CT	MS.gene27136	hypothetical protein MtrunA17_Chr6g0471181 [Medicago truncatula]	1745-1762	2.5
gra-MIR8782-p3_2ss13TC17CT	MS.gene91667	hypothetical protein MTR_2g017850 [Medicago truncatula]	508-525	2.2
gra-MIR8782-p3_2ss13TC17CT	MS.gene86846	hypothetical protein TSUD_299330 [Trifolium subterraneum]	563-580	2.5
gra-MIR8782-p3_2ss13TC17CT	MS.gene39758	putative formin, FH2 domain-containing protein [Medicago truncatula]	1768-1785	2.5
gra-MIR8782-p3_2ss13TC17CT	MS.gene008712	putative formin, FH2 domain-containing protein [Medicago truncatula]	2342-2359	2.5
gra-MIR8782-p3_2ss13TC17CT	MS.gene008716	probable phosphoinositide phosphatase SAC9 [Medicago truncatula]	5288-5305	2.5
gra-MIR8782-p3_2ss13TC17CT	MS.gene33627	hypothetical protein MTR_2g017850 [Medicago truncatula]	691-708	1.8
gra-MIR8782-p3_2ss13TC17CT	MS.gene043342	equilibrative nucleotide transporter 3 [Medicago truncatula]	105-122	2.5
gra-MIR8782-p3_2ss13TC17CT	MS.gene33591	GDSL-like lipase/acylhydrolase [Medicago truncatula]	1207-1224	2.5
gra-MIR8782-p3_2ss13TC17CT	MS.gene54355	pentatricopeptide repeat-containing protein At4g21880, mitochondrial isoform X1 [Medicago truncatula]	194-211	2.5
gra-MIR8782-p3_2ss13TC17CT	MS.gene073082	unknown [Medicago truncatula]	29-46	2.2
gra-MIR8782-p3_2ss13TC17CT	MS.gene56522	DUF4283 domain protein [Medicago truncatula]	1096-1113	2.2
gra-MIR8782-p3_2ss13TC17CT	MS.gene012747	uncharacterized protein LOC25494330 [Medicago truncatula]	481-498	2.5
gra-MIR8782-p3_2ss13TC17CT	MS.gene56540	G-type lectin S-receptor-like serine/threonine-protein kinase At4g27290 [Medicago truncatula]	1621-1638	2.2
gra-MIR8782-p3_2ss13TC17CT	MS.gene012714	uncharacterized protein LOC11441443 [Medicago truncatula]	97-114	2.2
gra-MIR8782-p3_2ss13TC17CT	MS.gene93989	zinc-finger of monoamine-oxidase A repressor R1 [Medicago truncatula]	257-274	2.5
gra-MIR8782-p3_2ss13TC17CT	MS.gene012677	LOW QUALITY PROTEIN: 1-aminocyclopropane-1-carboxylate oxidase [Medicago truncatula]	156-173	2.2
gra-MIR8782-p3_2ss13TC17CT	MS.gene93986	zinc-finger of monoamine-oxidase A repressor R1 [Medicago truncatula]	128-145	2.5
gra-MIR8782-p3_2ss13TC17CT	MS.gene93967	UV-B-induced protein At3g17800, chloroplastic [Medicago truncatula]	818-835	2
gra-MIR8782-p3_2ss13TC17CT	MS.gene026370	plectin [Medicago truncatula]	2366-2383	2.5
gra-MIR8782-p3_2ss13TC17CT	MS.gene059866	white-brown-complex ABC transporter family protein [Medicago truncatula]	359-376	2.5
gra-MIR8782-p3_2ss13TC17CT	MS.gene026263	nucleolin 1 isoform X2 [Medicago truncatula]	1316-1333	1.8
gra-MIR8782-p3_2ss13TC17CT	MS.gene50016	hypothetical protein MTR_0303s0010, partial [Medicago truncatula]	322-339	2.2
gra-MIR8782-p3_2ss13TC17CT	MS.gene060669	uncharacterized protein LOC25487276 isoform X2 [Medicago truncatula]	542-559	2
gra-MIR8782-p3_2ss13TC17CT	MS.gene05216	probable metal-nicotianamine transporter YSL7 [Medicago truncatula]	386-403	2.2
gra-MIR8782-p3_2ss13TC17CT	MS.gene29268	myosin heavy chain [Medicago truncatula]	2384-2401	2.5
gra-MIR8782-p3_2ss13TC17CT	MS.gene29268	myosin heavy chain [Medicago truncatula]	227-244	2.5
gra-MIR8782-p3_2ss13TC17CT	MS.gene58871	beta-glucosidase 44 [Medicago truncatula]	1320-1337	2.5
gra-MIR8782-p3_2ss13TC17CT	MS.gene58873	beta-glucosidase 44 [Medicago truncatula]	1320-1337	2.5
gra-MIR8782-p3_2ss13TC17CT	MS.gene56094	hypothetical protein MTR_5g058690 [Medicago truncatula]	626-643	2.5
gra-MIR8782-p3_2ss13TC17CT	MS.gene073325	mannosyl-oligosaccharide 1,2-alpha-mannosidase MNS1 isoform X1 [Medicago truncatula]	1305-1322	2.5
gra-MIR8782-p3_2ss13TC17CT	MS.gene057722	probable magnesium transporter NIPA6 [Medicago truncatula]	887-904	2.5
gra-MIR8782-p3_2ss13TC17CT	MS.gene45732	E3 ubiquitin-protein ligase ARI3, putative [Medicago truncatula]	1130-1147	2.5
gra-MIR8782-p3_2ss13TC17CT	MS.gene46283	AP2-like ethylene-responsive transcription factor PLT2 [Medicago truncatula]	470-487	2
gra-MIR8782-p3_2ss13TC17CT	MS.gene83342	hypothetical protein MTR_2g017850 [Medicago truncatula]	160-177	1.8
gra-MIR8782-p3_2ss13TC17CT	MS.gene034563	putative pectinesterase [Medicago truncatula]	682-699	2.5
gra-MIR8782-p3_2ss13TC17CT	MS.gene036806	mediator of RNA polymerase II transcription subunit 17 [Medicago truncatula]	936-953	2.5
gra-MIR8782-p3_2ss13TC17CT	MS.gene034711	hypothetical protein MTR_0303s0010, partial [Medicago truncatula]	691-708	1.8
gra-MIR8782-p3_2ss13TC17CT	MS.gene20538	P-loop nucleoside triphosphate hydrolase superfamily protein [Medicago truncatula]	437-454	2.5
gra-MIR8782-p3_2ss13TC17CT	MS.gene013190	ADP-ribosylation factor GTPase-activating protein AGD1 isoform X1 [Medicago truncatula]	675-692	2.5
gra-MIR8782-p3_2ss13TC17CT	MS.gene044530	putative phospholipid-transporting ATPase 9 [Medicago truncatula]	1819-1836	1.5
gra-MIR8782-p3_2ss13TC17CT	MS.gene92076	putative phospholipid-transporting ATPase 9 [Medicago truncatula]	1423-1440	1.5
gra-MIR8782-p3_2ss13TC17CT	MS.gene78096	fatty acyl-CoA reductase 3 [Medicago truncatula]	623-640	1.8
gra-MIR8782-p3_2ss13TC17CT	MS.gene22533	hypothetical protein MTR_2g017850 [Medicago truncatula]	373-390	2
gra-MIR8782-p3_2ss13TC17CT	MS.gene56886	serine/threonine-protein kinase AtPK2/AtPK19 isoform X2 [Medicago truncatula]	809-826	2
gra-MIR8782-p3_2ss13TC17CT	MS.gene018224	uncharacterized protein LOC112422609 [Medicago truncatula]	48-65	2.5
gra-MIR8782-p3_2ss13TC17CT	MS.gene56944	hypothetical protein MTR_2g017850 [Medicago truncatula]	394-411	1.8
gra-MIR8782-p3_2ss13TC17CT	MS.gene56945	hypothetical protein MTR_2g017850 [Medicago truncatula]	394-411	1.8
gra-MIR8782-p3_2ss13TC17CT	MS.gene018217	uncharacterized protein LOC112422453 isoform X1 [Medicago truncatula]	48-65	2.5
gra-MIR8782-p3_2ss13TC17CT	MS.gene56951	hypothetical protein MTR_2g017850 [Medicago truncatula]	322-339	1.8
gra-MIR8782-p3_2ss13TC17CT	MS.gene55106	transcription factor bHLH35 isoform X1 [Medicago truncatula]	296-313	2.5
gra-MIR8782-p3_2ss13TC17CT	MS.gene55107	transcription factor bHLH35 isoform X1 [Medicago truncatula]	296-313	2
gra-MIR8782-p3_2ss13TC17CT	MS.gene038031	ribonuclease H, partial [Trifolium pratense]	1829-1846	2.2
gra-MIR8782-p3_2ss13TC17CT	MS.gene001832	hypothetical protein L195_g049700 [Trifolium pratense]	18-35	2.5
gra-MIR8782-p3_2ss13TC17CT	MS.gene45300	uncharacterized protein LOC25479982 [Medicago truncatula]	323-340	2.5
gra-MIR8782-p3_2ss13TC17CT	MS.gene014889	two-component response regulator ARR12 [Medicago truncatula]	428-445	2.5
gra-MIR8782-p3_2ss13TC17CT	MS.gene072837	two-component response regulator ARR12 [Medicago truncatula]	428-445	2.5
gra-MIR8782-p3_2ss13TC17CT	MS.gene072834	two-component response regulator ARR12 [Medicago truncatula]	428-445	2.5
gra-MIR8782-p3_2ss13TC17CT	MS.gene014887	two-component response regulator ARR12 [Medicago truncatula]	428-445	2.5
gra-MIR8782-p3_2ss13TC17CT	MS.gene47158	P-loop nucleoside triphosphate hydrolase superfamily protein [Medicago truncatula]	251-268	2.5
gra-MIR8782-p3_2ss13TC17CT	MS.gene34836	hypothetical protein MTR_2g017850 [Medicago truncatula]	562-579	2.2
gra-MIR8782-p3_2ss13TC17CT	MS.gene058192	hypothetical protein MTR_2g017850 [Medicago truncatula]	220-237	2.2
gra-MIR8782-p3_2ss13TC17CT	MS.gene011609	novel plant SNARE 11 [Medicago truncatula]	760-777	2.5
gra-MIR8782-p3_2ss13TC17CT	MS.gene53000	protein SIEVE ELEMENT OCCLUSION B [Medicago truncatula]	3749-3766	2.5
gra-MIR8782-p3_2ss13TC17CT	MS.gene67721	hypothetical protein TSUD_383300 [Trifolium subterraneum]	473-490	2.5
gra-MIR8782-p3_2ss13TC17CT	MS.gene52987	cytoplasmic-like aconitate hydratase [Medicago truncatula]	1851-1868	2.5
gra-MIR8782-p3_2ss13TC17CT	MS.gene52951	putative E3 ubiquitin-protein ligase XBAT35 [Medicago truncatula]	1187-1204	2.2
gra-MIR8782-p3_2ss13TC17CT	MS.gene058334	probable WRKY transcription factor 14 [Medicago truncatula]	1381-1398	2.5
gra-MIR8782-p3_2ss13TC17CT	MS.gene40269	Ulp1 protease family, carboxy-terminal domain protein [Medicago truncatula]	1176-1193	2.5
gra-MIR8782-p3_2ss13TC17CT	MS.gene74672	glutathione reductase, cytosolic [Medicago truncatula]	1250-1267	1.8
gra-MIR8782-p3_2ss13TC17CT	MS.gene011795	filament-like plant protein 7 [Medicago truncatula]	2441-2458	2.2
gra-MIR8782-p3_2ss13TC17CT	MS.gene74896	uncharacterized protein LOC11420825 [Medicago truncatula]	247-264	2.5
gra-MIR8782-p3_2ss13TC17CT	MS.gene44943	probable disease resistance protein At5g66900 [Medicago truncatula]	314-331	2
gra-MIR8782-p3_2ss13TC17CT	MS.gene44954	probable copper-transporting ATPase HMA5 isoform X1 [Medicago truncatula]	863-880	2
gra-MIR8782-p3_2ss13TC17CT	MS.gene69449	papain family cysteine protease [Medicago truncatula]	724-741	1.8
gra-MIR8782-p3_2ss13TC17CT	MS.gene69606	papain family cysteine protease [Medicago truncatula]	724-741	1.8
gra-MIR8782-p3_2ss13TC17CT	MS.gene69352	ribonuclease H, partial [Trifolium pratense]	1829-1846	2.2
gra-MIR8782-p3_2ss13TC17CT	MS.gene017564	retrovirus-related Pol polyprotein from transposon TNT 1-94, partial [Trifolium pratense]	224-241	2.5
gra-MIR8782-p3_2ss13TC17CT	MS.gene80516	glyoxylate/succinic semialdehyde reductase 1 [Medicago truncatula]	677-694	2.5
gra-MIR8782-p3_2ss13TC17CT	MS.gene005378	endonuclease/exonuclease/phosphatase family protein [Medicago truncatula]	496-513	2.5
gra-MIR8782-p3_2ss13TC17CT	MS.gene047255	calcium-binding protein 39 isoform X1 [Medicago truncatula]	901-918	2
gra-MIR8782-p3_2ss13TC17CT	MS.gene80444	hypothetical protein MTR_2g017850 [Medicago truncatula]	745-762	2.2
gra-MIR8782-p3_2ss13TC17CT	MS.gene060035	hypothetical protein MTR_2g017850 [Medicago truncatula]	151-168	2.2
gra-MIR8782-p3_2ss13TC17CT	MS.gene49507	Ulp1 protease family, carboxy-terminal domain protein [Medicago truncatula]	1149-1166	2.5
gra-MIR8782-p3_2ss13TC17CT	MS.gene96222	putative uncharacterized protein DDB_G0270496 isoform X1 [Cicer arietinum]	377-394	2.5
gra-MIR8782-p3_2ss13TC17CT	MS.gene059400	hypothetical protein MTR_2g017850 [Medicago truncatula]	373-390	2.2
gra-MIR8782-p3_2ss13TC17CT	MS.gene005524	uncharacterized protein LOC11416802 [Medicago truncatula]	357-374	2.5
gra-MIR8782-p3_2ss13TC17CT	MS.gene005528	uncharacterized protein LOC11414442 [Medicago truncatula]	1286-1303	2.2
gra-MIR8782-p3_2ss13TC17CT	MS.gene008820	putative phospholipid-transporting ATPase 9 [Medicago truncatula]	134-151	2
gra-MIR8782-p3_2ss13TC17CT	MS.gene005561	hypothetical protein MtrunA17_Chr1g0195171 [Medicago truncatula]	774-791	2
gra-MIR8782-p3_2ss13TC17CT	MS.gene005575	probable pectinesterase/pectinesterase inhibitor 7 isoform X1 [Medicago truncatula]	667-684	2
gra-MIR8782-p3_2ss13TC17CT	MS.gene51622	polyprotein [Glycine max]	2897-2914	2
gra-MIR8782-p3_2ss13TC17CT	MS.gene84788	hypothetical protein MTR_5g058690 [Medicago truncatula]	485-502	2.5
gra-MIR8782-p3_2ss13TC17CT	MS.gene84818	hypothetical protein TSUD_81430 [Trifolium subterraneum]	743-760	2.5
gra-MIR8782-p3_2ss13TC17CT	MS.gene34519	hypothetical protein MTR_0303s0010, partial [Medicago truncatula]	691-708	1.8
gra-MIR8782-p3_2ss13TC17CT	MS.gene63937	putative pentacotripeptide-repeat region of PROPR [Medicago truncatula]	124-141	2.5
gra-MIR8782-p3_2ss13TC17CT	MS.gene039642	LRR and NB-ARC domain disease resistance protein [Medicago truncatula]	1606-1623	2.5
gra-MIR8782-p3_2ss13TC17CT	MS.gene039649	LRR and NB-ARC domain disease resistance protein [Medicago truncatula]	1444-1461	2.5
gra-MIR8782-p3_2ss13TC17CT	MS.gene01306	receptor-like serine/threonine-protein kinase SD1-8 [Medicago truncatula]	1408-1425	2
gra-MIR8782-p3_2ss13TC17CT	MS.gene63116	hydroxyproline O-galactosyltransferase GALT6 [Medicago truncatula]	1681-1698	2
gra-MIR8782-p3_2ss13TC17CT	MS.gene065626	hypothetical protein MTR_2g017850 [Medicago truncatula]	289-306	1.8
gra-MIR8782-p3_2ss13TC17CT	MS.gene071910	hypothetical protein TSUD_389090 [Trifolium subterraneum]	421-438	2.2
gra-MIR8782-p3_2ss13TC17CT	MS.gene066244	putative chitinase [Medicago truncatula]	662-679	2.5
gra-MIR8782-p3_2ss13TC17CT	MS.gene042878	Ulp1 protease family, carboxy-terminal domain protein [Medicago truncatula]	1176-1193	2.5
gra-MIR8782-p3_2ss13TC17CT	MS.gene81833	zinc-finger of monoamine-oxidase A repressor R1 [Medicago truncatula]	311-328	2.5
gra-MIR8782-p3_2ss13TC17CT	MS.gene81832	zinc-finger of monoamine-oxidase A repressor R1 [Medicago truncatula]	128-145	2.5
gra-MIR8782-p3_2ss13TC17CT	MS.gene022184	UV-B-induced protein At3g17800, chloroplastic [Medicago truncatula]	794-811	2
gra-MIR8782-p3_2ss13TC17CT	MS.gene006300	paramyosin [Medicago truncatula]	140-157	1.8
gra-MIR8782-p3_2ss13TC17CT	MS.gene92377	uncharacterized protein LOC25494473 [Medicago truncatula]	1029-1046	1.5
gra-MIR8782-p3_2ss13TC17CT	MS.gene92364	leucine-rich repeat protein 2 [Medicago truncatula]	137-154	2.5
gra-MIR8782-p3_2ss13TC17CT	MS.gene92364	leucine-rich repeat protein 2 [Medicago truncatula]	95-112	2.5
gra-MIR8782-p3_2ss13TC17CT	MS.gene37726	probable metal-nicotianamine transporter YSL7 [Medicago truncatula]	392-409	2.2
gra-MIR8782-p3_2ss13TC17CT	MS.gene86977	transcription factor bHLH25 [Medicago truncatula]	313-330	2.5
gra-MIR8782-p3_2ss13TC17CT	MS.gene86410	hypothetical protein MTR_2g017850 [Medicago truncatula]	613-630	1.8
gra-MIR8782-p3_2ss13TC17CT	MS.gene86818	hypothetical protein MTR_2g017850 [Medicago truncatula]	613-630	1.8
gra-MIR8782-p3_2ss13TC17CT	MS.gene49984	cysteine-rich receptor-kinase-like protein [Medicago truncatula]	712-729	2.5
gra-MIR8782-p3_2ss13TC17CT	MS.gene05298	beta-glucosidase 44 [Medicago truncatula]	1320-1337	2.5
gra-MIR8782-p3_2ss13TC17CT	MS.gene86368	nuclear pore complex protein NUP93A [Medicago truncatula]	1240-1257	2
gra-MIR8782-p3_2ss13TC17CT	MS.gene068990	pescadillo-like protein [Medicago truncatula]	175-192	2.5
gra-MIR8782-p3_2ss13TC17CT	MS.gene71730	sulfhydryl oxidase 2 isoform X1 [Medicago truncatula]	446-463	2.5
gra-MIR8782-p3_2ss13TC17CT	MS.gene77898	hypothetical protein MTR_2g017850 [Medicago truncatula]	448-465	2.2
gra-MIR8782-p3_2ss13TC17CT	MS.gene063898	Ulp1 protease family, carboxy-terminal domain protein [Medicago truncatula]	1110-1127	2.5
gra-MIR8782-p3_2ss13TC17CT	MS.gene74434	P-loop nucleoside triphosphate hydrolase superfamily protein [Medicago truncatula]	254-271	2.5
gra-MIR8782-p3_2ss13TC17CT	MS.gene89935	calmodulin-domain kinase CDPK protein [Medicago truncatula]	328-345	2.5
gra-MIR8782-p3_2ss13TC17CT	MS.gene89931	hypothetical protein MTR_2g017850 [Medicago truncatula]	682-699	1.8
gra-MIR8782-p3_2ss13TC17CT	MS.gene22226	hypothetical protein MTR_0303s0010, partial [Medicago truncatula]	402-419	2.2
gra-MIR8782-p3_2ss13TC17CT	MS.gene24085	Fanconi anemia group J protein homolog isoform X2 [Medicago truncatula]	968-985	2
gra-MIR8782-p3_2ss13TC17CT	MS.gene47303	hypothetical protein MTR_2g017850 [Medicago truncatula]	373-390	2.2
gra-MIR8782-p3_2ss13TC17CT	MS.gene23629	Ulp1 protease family, carboxy-terminal domain protein [Medicago truncatula]	426-443	2.5
gra-MIR8782-p3_2ss13TC17CT	MS.gene65554	glutathione reductase, cytosolic [Medicago truncatula]	1250-1267	1.8
gra-MIR8782-p3_2ss13TC17CT	MS.gene029003	equilibrative nucleotide transporter 3 [Medicago truncatula]	105-122	2.5
gra-MIR8782-p3_2ss13TC17CT	MS.gene027194	endonuclease/exonuclease/phosphatase family protein [Medicago truncatula]	64-81	2.5
gra-MIR8782-p3_2ss13TC17CT	MS.gene034426	Ulp1 protease family, carboxy-terminal domain protein [Medicago truncatula]	1110-1127	2.5
gra-MIR8782-p3_2ss13TC17CT	MS.gene010597	Ulp1 protease family, carboxy-terminal domain protein [Medicago truncatula]	1110-1127	2.5
gra-MIR8782-p3_2ss13TC17CT	MS.gene90645	unknown [Medicago truncatula]	29-46	2.2
gra-MIR8782-p3_2ss13TC17CT	MS.gene010629	hypothetical protein MtrunA17_Chr5g0405561 [Medicago truncatula]	611-628	2.2
gra-MIR8782-p3_2ss13TC17CT	MS.gene044072	ribonuclease H, partial [Trifolium pratense]	977-994	2.2
gra-MIR8782-p3_2ss13TC17CT	MS.gene016137	ethylene-responsive transcription factor ERF018 [Medicago truncatula]	185-202	1.5
gra-MIR8782-p3_2ss13TC17CT	MS.gene016134	putative transcription factor AP2-EREBP family [Medicago truncatula]	215-232	2.5
gra-MIR8782-p3_2ss13TC17CT	MS.gene016133	ethylene-responsive transcription factor ERF018 [Medicago truncatula]	218-235	1.5
gra-MIR8782-p3_2ss13TC17CT	MS.gene069380	white-brown-complex ABC transporter family protein [Medicago truncatula]	359-376	2.5
gra-MIR8782-p3_2ss13TC17CT	MS.gene68514	eukaryotic translation initiation factor 5b-like protein [Trifolium pratense]	281-298	2.5
gra-MIR8782-p3_2ss13TC17CT	MS.gene25038	pectinesterase [Medicago truncatula]	392-409	2.5
gra-MIR8782-p3_2ss13TC17CT	MS.gene25038	pectinesterase [Medicago truncatula]	46-63	2.5
gra-MIR8782-p3_2ss13TC17CT	MS.gene58380	uncharacterized protein LOC25487276 isoform X2 [Medicago truncatula]	542-559	2
gra-MIR8782-p3_2ss13TC17CT	MS.gene54108	putative protein kinase RLK-Pelle-WAK family [Medicago truncatula]	1188-1205	2
gra-MIR8782-p3_2ss13TC17CT	MS.gene052717	midasin isoform X1 [Medicago truncatula]	15563-15580	2.2
gra-MIR8782-p3_2ss13TC17CT	MS.gene93475	hypothetical protein MtrunA17_Chr6g0471181 [Medicago truncatula]	1748-1765	2.5
gra-MIR8782-p3_2ss13TC17CT	MS.gene059910	uncharacterized protein LOC11409278 [Medicago truncatula]	286-303	2.5
gra-MIR8782-p3_2ss13TC17CT	MS.gene04379	uncharacterized protein LOC11406437 isoform X1 [Medicago truncatula]	191-208	2.5
gra-MIR8782-p3_2ss13TC17CT	MS.gene04381	B3 domain-containing protein At3g18960 [Medicago truncatula]	476-493	2.5
gra-MIR8782-p3_2ss13TC17CT	MS.gene04431	alpha-glucan phosphorylase, H isozyme [Medicago truncatula]	1726-1743	2.5
gra-MIR8782-p3_2ss13TC17CT	MS.gene059150	probable pectinesterase/pectinesterase inhibitor 61 [Medicago truncatula]	1406-1423	2.5
gra-MIR8782-p3_2ss13TC17CT	MS.gene059150	probable pectinesterase/pectinesterase inhibitor 61 [Medicago truncatula]	775-792	2.2
gra-MIR8782-p3_2ss13TC17CT	MS.gene072115	inactive protein kinase SELMODRAFT_444075 [Medicago truncatula]	1411-1428	2
gra-MIR8782-p3_2ss13TC17CT	MS.gene94132	Ulp1 protease family, carboxy-terminal domain protein [Medicago truncatula]	1176-1193	2.5
gra-MIR8782-p3_2ss13TC17CT	MS.gene008642	inactive receptor-like serine/threonine-protein kinase At2g40270 [Medicago truncatula]	223-240	2.5
gra-MIR8782-p3_2ss13TC17CT	MS.gene42939	liver stage antigen 3, putative [Medicago truncatula]	1175-1192	2.5
gra-MIR8782-p3_2ss13TC17CT	MS.gene055414	SKP1 family, tetramerization domain protein [Medicago truncatula]	502-519	2.5
gra-MIR8782-p3_2ss13TC17CT	MS.gene05072	probable metal-nicotianamine transporter YSL7 isoform X1 [Medicago truncatula]	344-361	2.2
gra-MIR8782-p3_2ss13TC17CT	MS.gene72607	UV-B-induced protein At3g17800, chloroplastic [Medicago truncatula]	818-835	2
gra-MIR8782-p3_2ss13TC17CT	MS.gene05067	putative oligopeptide transporter, OPT superfamily [Medicago truncatula]	326-343	2.2
gra-MIR8782-p3_2ss13TC17CT	MS.gene05064	putative oligopeptide transporter, OPT superfamily [Medicago truncatula]	326-343	2.2
gra-MIR8782-p3_2ss13TC17CT	MS.gene95092	uncharacterized protein LOC25494330 [Medicago truncatula]	481-498	2.5
gra-MIR8782-p3_2ss13TC17CT	MS.gene040804	plectin [Medicago truncatula]	2360-2377	2.5
gra-MIR8782-p3_2ss13TC17CT	MS.gene041038	protein PHR1-LIKE 3 [Medicago truncatula]	236-253	2.5
gra-MIR8782-p3_2ss13TC17CT	MS.gene68876	LOW QUALITY PROTEIN: 1-aminocyclopropane-1-carboxylate oxidase [Medicago truncatula]	132-149	2.2
gra-MIR8782-p3_2ss13TC17CT	MS.gene66901	uncharacterized protein LOC112418629 [Medicago truncatula]	2459-2476	2
gra-MIR8782-p3_2ss13TC17CT	MS.gene68960	LOW QUALITY PROTEIN: 1-aminocyclopropane-1-carboxylate oxidase [Medicago truncatula]	51-68	2.2
gra-MIR8782-p3_2ss13TC17CT	MS.gene68871	LOW QUALITY PROTEIN: 1-aminocyclopropane-1-carboxylate oxidase [Medicago truncatula]	21-38	2.2
gra-MIR8782-p3_2ss13TC17CT	MS.gene054453	nucleolin 1 isoform X1 [Medicago truncatula]	1319-1336	1.8
gra-MIR8782-p3_2ss13TC17CT	MS.gene45566	probable metal-nicotianamine transporter YSL7 [Medicago truncatula]	386-403	2.2
gra-MIR8782-p3_2ss13TC17CT	MS.gene96463	hypothetical protein TSUD_81430 [Trifolium subterraneum]	179-196	2
gra-MIR8782-p3_2ss13TC17CT	MS.gene81847	beta-glucosidase 44 [Medicago truncatula]	1320-1337	2.5
gra-MIR8782-p3_2ss13TC17CT	MS.gene032039	rop guanine nucleotide exchange factor 5 [Medicago truncatula]	1189-1206	2.2
gra-MIR8782-p3_2ss13TC17CT	MS.gene026214	myosin heavy chain [Medicago truncatula]	1781-1798	2.5
gra-MIR8782-p3_2ss13TC17CT	MS.gene49956	Ulp1 protease family, carboxy-terminal domain protein [Medicago truncatula]	1176-1193	2.5
gra-MIR8782-p3_2ss13TC17CT	MS.gene042950	Ulp1 protease family, carboxy-terminal domain protein [Medicago truncatula]	1176-1193	2.5
gra-MIR8782-p3_2ss13TC17CT	MS.gene29082	vignain [Medicago truncatula]	627-644	2
gra-MIR8782-p3_2ss13TC17CT	MS.gene030327	aspartyl protease APCB1 [Medicago truncatula]	458-475	2.5
gra-MIR8782-p3_2ss13TC17CT	MS.gene41343	chromosome transmission fidelity protein 18 homolog [Medicago truncatula]	2719-2736	1.8
gra-MIR8782-p3_2ss13TC17CT	MS.gene64130	cysteine desulfurase mitochondrial-like, partial [Trifolium pratense]	902-919	2.5
gra-MIR8782-p3_2ss13TC17CT	MS.gene64101	zinc-finger homeodomain protein 2 [Medicago truncatula]	698-715	2.5
gra-MIR8782-p3_2ss13TC17CT	MS.gene67733	transcription factor bHLH35 isoform X1 [Medicago truncatula]	296-313	2.5
gra-MIR8782-p3_2ss13TC17CT	MS.gene67734	transcription factor bHLH35 isoform X1 [Medicago truncatula]	296-313	2
gra-MIR8782-p3_2ss13TC17CT	MS.gene025846	hypothetical protein MTR_2g017850 [Medicago truncatula]	691-708	1.8
gra-MIR8782-p3_2ss13TC17CT	MS.gene018850	hypothetical protein MTR_0303s0010, partial [Medicago truncatula]	370-387	2.2
gra-MIR8782-p3_2ss13TC17CT	MS.gene78334	piezo-type mechanosensitive ion channel homolog isoform X1 [Medicago truncatula]	2534-2551	2.5
gra-MIR8782-p3_2ss13TC17CT	MS.gene018804	hypothetical protein MTR_2g017850 [Medicago truncatula]	373-390	2.2
gra-MIR8782-p3_2ss13TC17CT	MS.gene35904	UDP-glycosyltransferase 87A1 [Medicago truncatula]	224-241	2.5
gra-MIR8782-p3_2ss13TC17CT	MS.gene55993	hypothetical protein MTR_2g017850 [Medicago truncatula]	613-630	1.8
gra-MIR8782-p3_2ss13TC17CT	MS.gene55974	serine hydroxymethyltransferase 3, chloroplastic [Cicer arietinum]	578-595	2.5
gra-MIR8782-p3_2ss13TC17CT	MS.gene98992	putative pectinesterase [Medicago truncatula]	682-699	2.5
gra-MIR8782-p3_2ss13TC17CT	MS.gene39170	Ulp1 protease family, carboxy-terminal domain protein [Medicago truncatula]	180-197	2.5
gra-MIR8782-p3_2ss13TC17CT	MS.gene39172	Ulp1 protease family, carboxy-terminal domain protein [Medicago truncatula]	1176-1193	2.5
gra-MIR8782-p3_2ss13TC17CT	MS.gene55899	probable WRKY transcription factor 14 [Medicago truncatula]	1417-1434	2.5
gra-MIR8782-p3_2ss13TC17CT	MS.gene62431	mediator of RNA polymerase II transcription subunit 17 [Medicago truncatula]	936-953	2.5
gra-MIR8782-p3_2ss13TC17CT	MS.gene32482	helicase-like protein [Trifolium pratense]	148-165	2
gra-MIR8782-p3_2ss13TC17CT	MS.gene048273	Ulp1 protease family, carboxy-terminal domain protein [Medicago truncatula]	1176-1193	2.5
gra-MIR8782-p3_2ss13TC17CT	MS.gene029739	Ulp1 protease family, carboxy-terminal domain protein [Medicago truncatula]	1009-1026	2.5
gra-MIR8782-p3_2ss13TC17CT	MS.gene56670	uncharacterized protein LOC11413741 [Medicago truncatula]	1220-1237	2
gra-MIR8782-p3_2ss13TC17CT	MS.gene09806	hypothetical protein MtrunA17_Chr7g0263671 [Medicago truncatula]	2247-2264	2.5
gra-MIR8782-p3_2ss13TC17CT	MS.gene20231	hypothetical protein MtrunA17_Chr7g0263671 [Medicago truncatula]	2247-2264	2.5
gra-MIR8782-p3_2ss13TC17CT	MS.gene029836	hypothetical protein MTR_0303s0010, partial [Medicago truncatula]	579-596	2.2
gra-MIR8782-p3_2ss13TC17CT	MS.gene60318	serine/threonine-protein kinase AtPK2/AtPK19 isoform X1 [Medicago truncatula]	884-901	2
gra-MIR8782-p3_2ss13TC17CT	MS.gene51094	ribonuclease H, partial [Trifolium pratense]	1361-1378	2.2
gra-MIR8782-p3_2ss13TC17CT	MS.gene30870	SKP1 family, tetramerization domain protein [Medicago truncatula]	502-519	2.5
gra-MIR8782-p3_2ss13TC17CT	MS.gene007606	sulfite exporter TauE/SafE family protein [Medicago truncatula]	665-682	2.2
gra-MIR8782-p3_2ss13TC17CT	MS.gene00938	calcium-binding protein 39 isoform X1 [Medicago truncatula]	901-918	2
gra-MIR8782-p3_2ss13TC17CT	MS.gene47030	DUF4283 domain protein [Medicago truncatula]	1976-1993	2.5
gra-MIR8782-p3_2ss13TC17CT	MS.gene018084	PPR containing protein, putative [Medicago truncatula]	140-157	2.5
gra-MIR8782-p3_2ss13TC17CT	MS.gene61249	novel plant SNARE 11 [Medicago truncatula]	760-777	2.5
gra-MIR8782-p3_2ss13TC17CT	MS.gene018081	PPR containing protein, putative [Medicago truncatula]	140-157	2.5
gra-MIR8782-p3_2ss13TC17CT	MS.gene41646	ADP-ribosylation factor GTPase-activating protein AGD1 isoform X1 [Medicago truncatula]	675-692	2.5
gra-MIR8782-p3_2ss13TC17CT	MS.gene047380	probable leucine-rich repeat receptor-like protein kinase At5g49770 [Medicago truncatula]	2688-2705	2.5
gra-MIR8782-p3_2ss13TC17CT	MS.gene56800	filament-like plant protein 7 [Medicago truncatula]	2441-2458	2.2
gra-MIR8782-p3_2ss13TC17CT	MS.gene011864	probable disease resistance protein At5g66900 [Medicago truncatula]	314-331	2
gra-MIR8782-p3_2ss13TC17CT	MS.gene67205	uncharacterized protein LOC11429573 [Medicago truncatula]	1070-1087	2.5
gra-MIR8782-p3_2ss13TC17CT	MS.gene011875	probable copper-transporting ATPase HMA5 isoform X1 [Medicago truncatula]	863-880	2
gra-MIR8782-p3_2ss13TC17CT	MS.gene066020	cytoplasmic-like aconitate hydratase [Medicago truncatula]	1392-1409	2.5
gra-MIR8782-p3_2ss13TC17CT	MS.gene062306	Ulp1 protease family, carboxy-terminal domain protein [Medicago truncatula]	1149-1166	2.5
gra-MIR8782-p3_2ss13TC17CT	MS.gene062294	peptide methionine sulfoxide reductase A1 isoform X1 [Medicago truncatula]	599-616	2.5
gra-MIR8782-p3_2ss13TC17CT	MS.gene002327	receptor-like serine/threonine-protein kinase SD1-8 [Medicago truncatula]	1408-1425	2
gra-MIR8782-p3_2ss13TC17CT	MS.gene011959	hypothetical protein MTR_0303s0010, partial [Medicago truncatula]	322-339	2.5
gra-MIR8782-p3_2ss13TC17CT	MS.gene80203	two-component response regulator ARR12 [Medicago truncatula]	428-445	2.5
gra-MIR8782-p3_2ss13TC17CT	MS.gene002209	hypothetical protein TSUD_389090 [Trifolium subterraneum]	421-438	2.2
gra-MIR8782-p3_2ss13TC17CT	MS.gene037802	retrovirus-related Pol polyprotein from transposon TNT 1-94, partial [Trifolium pratense]	224-241	2.5
gra-MIR8782-p3_2ss13TC17CT	MS.gene002072	hypothetical protein MTR_2g017850 [Medicago truncatula]	673-690	1.8
gra-MIR8782-p3_2ss13TC17CT	MS.gene93080	putative phospholipid-transporting ATPase 9 [Medicago truncatula]	134-151	2
gra-MIR8782-p3_2ss13TC17CT	MS.gene07384	putative E3 ubiquitin-protein ligase XBAT35 [Medicago truncatula]	1187-1204	2.2
gra-MIR8782-p3_2ss13TC17CT	MS.gene067454	transcription factor bHLH25 [Medicago truncatula]	163-180	2.5
gra-MIR8782-p3_2ss13TC17CT	MS.gene40543	uncharacterized protein LOC25494473 [Medicago truncatula]	1017-1034	1.5
gra-MIR8782-p3_2ss13TC17CT	MS.gene064708	papain family cysteine protease [Medicago truncatula]	724-741	1.8
gra-MIR8782-p3_2ss13TC17CT	MS.gene024146	subtilisin-like protease Glyma18g48580 [Medicago truncatula]	1337-1354	2
gra-MIR8782-p3_2ss13TC17CT	MS.gene024144	subtilisin-like protease-like protein, partial [Trifolium pratense]	635-652	2
gra-MIR8782-p3_2ss13TC17CT	MS.gene89051	nuclear pore complex protein NUP93A [Medicago truncatula]	1240-1257	2
gra-MIR8782-p3_2ss13TC17CT	MS.gene20799	uncharacterized protein LOC11416802 [Medicago truncatula]	357-374	2.5
gra-MIR8782-p3_2ss13TC17CT	MS.gene20794	uncharacterized protein LOC11414442 [Medicago truncatula]	764-781	2.2
gra-MIR8782-p3_2ss13TC17CT	MS.gene064755	uncharacterized protein LOC11426828 isoform X1 [Medicago truncatula]	374-391	2
gra-MIR8782-p3_2ss13TC17CT	MS.gene008991	hypothetical protein MTR_0303s0010, partial [Medicago truncatula]	406-423	1.8
gra-MIR8782-p3_2ss13TC17CT	MS.gene20764	hypothetical protein MtrunA17_Chr1g0195171 [Medicago truncatula]	774-791	2
gra-MIR8782-p3_2ss13TC17CT	MS.gene20750	probable pectinesterase/pectinesterase inhibitor 7 isoform X1 [Medicago truncatula]	667-684	2
gra-MIR8782-p3_2ss13TC17CT	MS.gene20749	probable pectinesterase/pectinesterase inhibitor 7 isoform X1 [Medicago truncatula]	667-684	2
gra-MIR8782-p3_2ss13TC17CT	MS.gene25355	hydroxyproline O-galactosyltransferase GALT6 [Medicago truncatula]	1681-1698	2
gra-MIR8782-p3_2ss13TC17CT	MS.gene25371	putative protein kinase RLK-Pelle-LRR-XII-1 family [Medicago truncatula]	696-713	2.5
gra-MIR8782-p3_2ss13TC17CT	MS.gene048984	hypothetical protein L195_g001543 [Trifolium pratense]	1535-1552	2.5
gra-MIR8782-p3_2ss13TC17CT	MS.gene06051	COP1-interactive protein 1 [Medicago truncatula]	1541-1558	2.5
gra-MIR8782-p3_2ss13TC17CT	MS.gene34098	putative pleiotropic drug resistance protein PDR/CDR [Medicago truncatula]	14-31	2
gra-MIR8782-p3_2ss13TC17CT	MS.gene31551	equilibrative nucleotide transporter 3 [Medicago truncatula]	105-122	2.5
gra-MIR8782-p3_2ss13TC17CT	MS.gene34485	paramyosin [Medicago truncatula]	140-157	1.8
gra-MIR8782-p3_2ss13TC17CT	MS.gene70137	E3 ubiquitin-protein ligase CHFR isoform X2 [Medicago truncatula]	1314-1331	2
gra-MIR8782-p3_2ss13TC17CT	MS.gene64757	hypothetical protein TSUD_329120, partial [Trifolium subterraneum]	3053-3070	2.5
gra-MIR8782-p3_2ss13TC17CT	MS.gene43074	unknown [Medicago truncatula]	29-46	2.2
gra-MIR8782-p3_2ss13TC17CT	MS.gene64776	hypothetical protein MtrunA17_Chr5g0405561 [Medicago truncatula]	611-628	2.2
gra-MIR8782-p3_2ss13TC17CT	MS.gene67572	Ulp1 protease family, carboxy-terminal domain protein [Medicago truncatula]	180-197	2.5
gra-MIR8782-p3_2ss13TC17CT	MS.gene67510	Ulp1 protease family, carboxy-terminal domain protein [Medicago truncatula]	1176-1193	2.5
gra-MIR8782-p3_2ss13TC17CT	MS.gene70237	uncharacterized protein LOC11436750 isoform X1 [Medicago truncatula]	35-52	2.5
gra-MIR8782-p3_2ss13TC17CT	MS.gene93829	cysteine-rich receptor-kinase-like protein [Medicago truncatula]	1303-1320	2.5
gra-MIR8782-p3_2ss13TC17CT	MS.gene65042	G-type lectin S-receptor-like Serine/Threonine-kinase [Medicago truncatula]	1546-1563	2.5
gra-MIR8782-p3_2ss13TC17CT	MS.gene65040	G-type lectin S-receptor-like serine/threonine-protein kinase At1g11300 [Medicago truncatula]	1618-1635	2.5
gra-MIR8782-p3_2ss13TC17CT	MS.gene65037	G-type lectin S-receptor-like serine/threonine-protein kinase At1g11300 isoform X1 [Medicago truncatula]	1624-1641	2.5
gra-MIR8782-p3_2ss13TC17CT	MS.gene065171	white-brown-complex ABC transporter family protein [Medicago truncatula]	359-376	2.5
gra-MIR8782-p3_2ss13TC17CT	MS.gene23710	ribonuclease H, partial [Trifolium pratense]	2000-2017	2.2
gra-MIR8782-p3_2ss13TC17CT	MS.gene92948	sulfhydryl oxidase 2 isoform X1 [Medicago truncatula]	455-472	2.5
gra-MIR8782-p3_2ss13TC17CT	MS.gene029485	zinc finger CCCH domain-containing protein 15 [Medicago truncatula]	1013-1030	2.5
gra-MIR8782-p3_2ss13TC17CT	MS.gene027299	histone-lysine N-methyltransferase [Medicago truncatula]	1315-1332	2.5
gra-MIR8782-p3_2ss13TC17CT	MS.gene059752	uncharacterized protein LOC25487276 isoform X2 [Medicago truncatula]	542-559	2
gra-MIR8782-p3_2ss13TC17CT	MS.gene57503	Ara4-interacting protein [Medicago truncatula]	824-841	2.5
gra-MIR8782-p3_2ss13TC17CT	MS.gene63378	uncharacterized protein LOC11409278 [Medicago truncatula]	286-303	2.5
gra-MIR8782-p3_2ss13TC17CT	MS.gene64365	Ulp1 protease family, carboxy-terminal domain protein [Medicago truncatula]	648-665	2.5
gra-MIR8782-p3_2ss13TC17CT	MS.gene98192	hypothetical protein MTR_2g020400 [Medicago truncatula]	185-202	2.5
gra-MIR8782-p3_2ss13TC17CT	MS.gene98192	hypothetical protein MTR_2g020400 [Medicago truncatula]	143-160	2.5
gra-MIR8782-p3_2ss13TC17CT	MS.gene09223	hypothetical protein TSUD_398950 [Trifolium subterraneum]	3173-3190	2.2
gra-MIR8782-p3_2ss13TC17CT	MS.gene46513	hypothetical protein MTR_0303s0010, partial [Medicago truncatula]	691-708	1.8
gra-MIR8782-p3_2ss13TC17CT	MS.gene30002	hypothetical protein TSUD_397840 [Trifolium subterraneum]	1046-1063	2
gra-MIR8782-p3_2ss13TC17CT	MS.gene88933	Fanconi anemia group J protein homolog isoform X2 [Medicago truncatula]	968-985	2
gra-MIR8782-p3_2ss13TC17CT	MS.gene000494	alkane hydroxylase MAH1 [Medicago truncatula]	367-384	2.5
gra-MIR8782-p3_2ss13TC17CT	MS.gene08383	putative glutamate decarboxylase [Medicago truncatula]	546-563	2.2
gra-MIR8782-p3_2ss13TC17CT	MS.gene89464	putative transcription factor C2H2 family [Medicago truncatula]	641-658	2.5
gra-MIR8782-p3_2ss13TC17CT	MS.gene070411	uncharacterized protein At4g02000-like [Medicago truncatula]	950-967	2.2
gra-MIR8782-p3_2ss13TC17CT	MS.gene074440	hypothetical protein MTR_2g017850 [Medicago truncatula]	691-708	1.8
gra-MIR8782-p3_2ss13TC17CT	MS.gene074422	disease resistance-like protein DSC1 [Medicago truncatula]	3147-3164	2.2
gra-MIR8782-p3_2ss13TC17CT	MS.gene011275	hypothetical protein MTR_2g017850 [Medicago truncatula]	406-423	1.8
gra-MIR8782-p3_2ss13TC17CT	MS.gene36798	hypothetical protein MTR_2g017850 [Medicago truncatula]	406-423	1.8
gra-MIR8782-p3_2ss13TC17CT	MS.gene73615	hypothetical protein MTR_2g017850 [Medicago truncatula]	520-537	1.8
gra-MIR8782-p3_2ss13TC17CT	MS.gene028440	copper-transporting ATPase PAA1, chloroplastic [Medicago truncatula]	648-665	2.5
gra-MIR8782-p3_2ss13TC17CT	MS.gene37008	inactive protein kinase SELMODRAFT_444075 [Medicago truncatula]	1411-1428	2
gra-MIR8782-p3_2ss13TC17CT	MS.gene061394	Ulp1 protease family, carboxy-terminal domain protein [Medicago truncatula]	1176-1193	2.5
gra-MIR8782-p3_2ss13TC17CT	MS.gene051527	ethylene-responsive transcription factor ERF018 [Medicago truncatula]	218-235	1.5
gra-MIR8782-p3_2ss13TC17CT	MS.gene26399	isoflavone-7-O-methyltransferase [Medicago truncatula]	63-80	1.8
gra-MIR8782-p3_2ss13TC17CT	MS.gene26859	isoflavone-7-O-methyltransferase [Medicago truncatula]	63-80	1.8
gra-MIR8782-p3_2ss13TC17CT	MS.gene26600	hypothetical protein MTR_2g017850 [Medicago truncatula]	562-579	1.8
gra-MIR8782-p3_2ss13TC17CT	MS.gene26586	putative formin, FH2 domain-containing protein [Medicago truncatula]	2330-2347	2.5
gra-MIR8782-p3_2ss13TC17CT	MS.gene26582	probable phosphoinositide phosphatase SAC9 [Medicago truncatula]	5288-5305	2.5
gra-MIR8782-p3_2ss13TC17CT	MS.gene020067	hypothetical protein MTR_2g017850 [Medicago truncatula]	511-528	1.8
gra-MIR8782-p3_2ss13TC17CT	MS.gene86336	putative protein kinase RLK-Pelle-WAK family [Medicago truncatula]	266-283	2
gra-MIR8782-p3_2ss13TC17CT	MS.gene86333	hypothetical protein TSUD_08700 [Trifolium subterraneum]	1212-1229	2
gra-MIR8782-p3_2ss13TC17CT	MS.gene042695	transcription factor [Medicago truncatula]	727-744	2
gra-MIR8782-p3_2ss13TC17CT	MS.gene042682	protein CHUP1, chloroplastic [Medicago truncatula]	131-148	2.5
gra-MIR8782-p3_2ss13TC17CT	MS.gene042666	hypothetical protein MTR_2g069520 [Medicago truncatula]	363-380	2.5
gra-MIR8782-p3_2ss13TC17CT	MS.gene042647	hypothetical protein MTR_0303s0010, partial [Medicago truncatula]	538-555	2.2
gra-MIR8782-p3_2ss13TC17CT	MS.gene006788	G-type lectin S-receptor-like serine/threonine-protein kinase At4g27290 [Medicago truncatula]	1621-1638	2.2
gra-MIR8782-p3_2ss13TC17CT	MS.gene99155	SKP1 family, tetramerization domain protein [Medicago truncatula]	502-519	2
gra-MIR8782-p3_2ss13TC17CT	MS.gene99135	hypothetical protein MTR_2g017850 [Medicago truncatula]	691-708	1.8
gra-MIR8782-p3_2ss13TC17CT	MS.gene036006	hypothetical protein MTR_0303s0010, partial [Medicago truncatula]	402-419	2.2
gra-MIR8782-p3_2ss13TC17CT	MS.gene74785	DUF4283 domain protein [Medicago truncatula]	889-906	2.2
gra-MIR8782-p3_2ss13TC17CT	MS.gene07728	transcription factor bHLH35 isoform X1 [Medicago truncatula]	296-313	2
gra-MIR8782-p3_2ss13TC17CT	MS.gene07729	transcription factor bHLH35 isoform X1 [Medicago truncatula]	296-313	2
gra-MIR8782-p3_2ss13TC17CT	MS.gene55701	probable pectinesterase/pectinesterase inhibitor 61 [Medicago truncatula]	1406-1423	2.5
gra-MIR8782-p3_2ss13TC17CT	MS.gene55701	probable pectinesterase/pectinesterase inhibitor 61 [Medicago truncatula]	775-792	2.2
gra-MIR8782-p3_2ss13TC17CT	MS.gene059154	uncharacterized protein LOC11429788 [Medicago truncatula]	2019-2036	2.5
gra-MIR8782-p3_2ss13TC17CT	MS.gene006666	hypothetical protein MTR_2g020400 [Medicago truncatula]	143-160	2.5
gra-MIR8782-p3_2ss13TC17CT	MS.gene035911	ethylene-responsive transcription factor RAP2-4 [Medicago truncatula]	815-832	2.5
gra-MIR8782-p3_2ss13TC17CT	MS.gene042114	uncharacterized protein LOC11441443 [Medicago truncatula]	97-114	2.5
gra-MIR8782-p3_2ss13TC17CT	MS.gene042138	LOW QUALITY PROTEIN: 1-aminocyclopropane-1-carboxylate oxidase [Medicago truncatula]	132-149	2.2
gra-MIR8782-p3_2ss13TC17CT	MS.gene010148	cysteine desulfurase mitochondrial-like, partial [Trifolium pratense]	353-370	2.5
gra-MIR8782-p3_2ss13TC17CT	MS.gene010125	zinc-finger homeodomain protein 2 [Medicago truncatula]	686-703	2.5
gra-MIR8782-p3_2ss13TC17CT	MS.gene63002	uncharacterized protein LOC11418205 [Medicago truncatula]	329-346	1.5
gra-MIR8782-p3_2ss13TC17CT	MS.gene52088	probable magnesium transporter NIPA6 [Medicago truncatula]	887-904	2.5
gra-MIR8782-p3_2ss13TC17CT	MS.gene96313	mannosyl-oligosaccharide 1,2-alpha-mannosidase MNS1 isoform X1 [Medicago truncatula]	1305-1322	2.5
gra-MIR8782-p3_2ss13TC17CT	MS.gene67885	probable WRKY transcription factor 14 [Medicago truncatula]	907-924	2.5
gra-MIR8782-p3_2ss13TC17CT	MS.gene44894	hypothetical protein MTR_0019s0170 [Medicago truncatula]	402-419	2.5
gra-MIR8782-p3_2ss13TC17CT	MS.gene003695	hypothetical protein TSUD_398950 [Trifolium subterraneum]	3518-3535	2.2
gra-MIR8782-p3_2ss13TC17CT	MS.gene29306	piezo-type mechanosensitive ion channel homolog isoform X1 [Medicago truncatula]	2864-2881	2.5
gra-MIR8782-p3_2ss13TC17CT	MS.gene061707	plectin [Medicago truncatula]	2294-2311	2.5
gra-MIR8782-p3_2ss13TC17CT	MS.gene44566	nucleolin 1 isoform X1 [Medicago truncatula]	1319-1336	1.8
gra-MIR8782-p3_2ss13TC17CT	MS.gene50220	UDP-glycosyltransferase 87A1 [Medicago truncatula]	224-241	2.5
gra-MIR8782-p3_2ss13TC17CT	MS.gene02871	Ulp1 protease family, carboxy-terminal domain protein [Medicago truncatula]	1176-1193	2.5
gra-MIR8782-p3_2ss13TC17CT	MS.gene95928	myosin heavy chain [Medicago truncatula]	1781-1798	2.5
gra-MIR8782-p3_2ss13TC17CT	MS.gene95929	uncharacterized protein At5g23160 [Medicago truncatula]	227-244	2.5
gra-MIR8782-p3_2ss13TC17CT	MS.gene91145	hypothetical protein MTR_0303s0010, partial [Medicago truncatula]	358-375	1.8
gra-MIR8782-p3_2ss13TC17CT	MS.gene003945	AP2-like ethylene-responsive transcription factor PLT2 [Medicago truncatula]	620-637	2
gra-MIR8782-p3_2ss13TC17CT	MS.gene047949	Ulp1 protease family, carboxy-terminal domain protein [Medicago truncatula]	1176-1193	2.5
gra-MIR8782-p3_2ss13TC17CT	MS.gene004512	calcium-binding protein 39 isoform X1 [Medicago truncatula]	901-918	2
gra-MIR8782-p3_2ss13TC17CT	MS.gene53708	chromosome transmission fidelity protein 18 homolog [Medicago truncatula]	2719-2736	1.8
gra-MIR8782-p3_2ss13TC17CT	MS.gene060705	hypothetical protein MTR_0303s0010, partial [Medicago truncatula]	369-386	2.2
gra-MIR8782-p3_2ss13TC17CT	MS.gene020579	sulfite exporter TauE/SafE family protein [Medicago truncatula]	509-526	2.2
gra-MIR8782-p3_2ss13TC17CT	MS.gene24637	sulfite exporter TauE/SafE family protein 4 isoform X1 [Medicago truncatula]	509-526	2.2
gra-MIR8782-p3_2ss13TC17CT	MS.gene007339	sulfite exporter TauE/SafE family protein 4 isoform X1 [Medicago truncatula]	665-682	2.2
gra-MIR8782-p3_2ss13TC17CT	MS.gene020580	sulfite exporter TauE/SafE family protein 4 isoform X1 [Medicago truncatula]	665-682	2.2
gra-MIR8782-p3_2ss13TC17CT	MS.gene61493	mediator of RNA polymerase II transcription subunit 17 [Medicago truncatula]	936-953	2.5
gra-MIR8782-p3_2ss13TC17CT	MS.gene29612	uncharacterized protein LOC11413741 [Medicago truncatula]	863-880	2
gra-MIR8782-p3_2ss13TC17CT	MS.gene07684	AT-hook motif nuclear-localized protein 9 [Medicago truncatula]	726-743	2.5
gra-MIR8782-p3_2ss13TC17CT	MS.gene038790	putative phospholipid-transporting ATPase 9 [Medicago truncatula]	1819-1836	1.5
gra-MIR8782-p3_2ss13TC17CT	MS.gene070813	fatty acyl-CoA reductase 3 [Medicago truncatula]	623-640	1.8
gra-MIR8782-p3_2ss13TC17CT	MS.gene004197	probable leucine-rich repeat receptor-like protein kinase At5g49770 [Medicago truncatula]	2688-2705	2.5
gra-MIR8782-p3_2ss13TC17CT	MS.gene03842	transcription factor TGA9 [Medicago truncatula]	461-478	2.2
gra-MIR8782-p3_2ss13TC17CT	MS.gene01065	hypothetical protein MTR_2g020400 [Medicago truncatula]	431-448	2.5
gra-MIR8782-p3_2ss13TC17CT	MS.gene061905	pescadillo homolog [Medicago truncatula]	1711-1728	2.5
gra-MIR8782-p3_2ss13TC17CT	MS.gene033193	serine/threonine-protein kinase AtPK2/AtPK19 isoform X1 [Medicago truncatula]	884-901	2
gra-MIR8782-p3_2ss13TC17CT	MS.gene01719	receptor-like serine/threonine-protein kinase SD1-8 [Medicago truncatula]	1408-1425	2
gra-MIR8782-p3_2ss13TC17CT	MS.gene51342	coiled-coil domain-containing protein 39 [Medicago truncatula]	18-35	2.5
gra-MIR8782-p3_2ss13TC17CT	MS.gene51390	hypothetical protein MTR_2g017850 [Medicago truncatula]	559-576	2.2
gra-MIR8782-p3_2ss13TC17CT	MS.gene047414	hypothetical protein TSUD_389090 [Trifolium subterraneum]	421-438	2.2
gra-MIR8782-p3_2ss13TC17CT	MS.gene71130	hypothetical protein MTR_0303s0010, partial [Medicago truncatula]	388-405	2.2
gra-MIR8782-p3_2ss13TC17CT	MS.gene025517	structural constituent of ribosome protein, putative [Medicago truncatula]	853-870	2.5
gra-MIR8782-p3_2ss13TC17CT	MS.gene025515	structural constituent of ribosome protein, putative [Medicago truncatula]	883-900	2.5
gra-MIR8782-p3_2ss13TC17CT	MS.gene035033	hypothetical protein MTR_2g020400 [Medicago truncatula]	230-247	2.5
gra-MIR8782-p3_2ss13TC17CT	MS.gene72384	hypothetical protein TanjilG_24108 [Lupinus angustifolius]	760-777	2.5
gra-MIR8782-p3_2ss13TC17CT	MS.gene72583	RALF-like protein [Medicago truncatula]	70-87	2.5
gra-MIR8782-p3_2ss13TC17CT	MS.gene065502	peptide methionine sulfoxide reductase A1 isoform X1 [Medicago truncatula]	599-616	2.5
gra-MIR8782-p3_2ss13TC17CT	MS.gene073819	SKP1 family, tetramerization domain protein [Medicago truncatula]	325-342	2.5
gra-MIR8782-p3_2ss13TC17CT	MS.gene96593	DNA mismatch repair protein MLH1 [Medicago truncatula]	1900-1917	2.5
gra-MIR8782-p3_2ss13TC17CT	MS.gene013964	uncharacterized protein LOC112420368 [Medicago truncatula]	890-907	2.5
gra-MIR8782-p3_2ss13TC17CT	MS.gene013964	uncharacterized protein LOC112420368 [Medicago truncatula]	863-880	2.5
gra-MIR8782-p3_2ss13TC17CT	MS.gene013964	uncharacterized protein LOC112420368 [Medicago truncatula]	836-853	2.5
gra-MIR8782-p3_2ss13TC17CT	MS.gene90490	filament-like plant protein 7 [Medicago truncatula]	2441-2458	2.2
gra-MIR8782-p3_2ss13TC17CT	MS.gene87334	probable disease resistance protein At5g66900 [Medicago truncatula]	314-331	2
gra-MIR8782-p3_2ss13TC17CT	MS.gene87342	probable copper-transporting ATPase HMA5 isoform X1 [Medicago truncatula]	863-880	2
gra-MIR8782-p3_2ss13TC17CT	MS.gene067620	uncharacterized protein YMR317W-like [Medicago truncatula]	245-262	2.5
gra-MIR8782-p3_2ss13TC17CT	MS.gene45792	hypothetical protein MTR_2g017850 [Medicago truncatula]	673-690	1.8
gra-MIR8782-p3_2ss13TC17CT	MS.gene71455	uncharacterized protein LOC11429573 [Medicago truncatula]	1070-1087	2.5
gra-MIR8782-p3_2ss13TC17CT	MS.gene71454	protein SIEVE ELEMENT OCCLUSION B [Medicago truncatula]	2966-2983	2.5
gra-MIR8782-p3_2ss13TC17CT	MS.gene71438	cytoplasmic-like aconitate hydratase [Medicago truncatula]	1647-1664	2.5
gra-MIR8782-p3_2ss13TC17CT	MS.gene65388	uncharacterized protein LOC112418629 [Medicago truncatula]	2459-2476	2
gra-MIR8782-p3_2ss13TC17CT	MS.gene039614	PPR containing protein, putative [Medicago truncatula]	212-229	2.5
gra-MIR8782-p3_2ss13TC17CT	MS.gene85555	putative E3 ubiquitin-protein ligase XBAT35 [Medicago truncatula]	1187-1204	2.2
gra-MIR8782-p3_2ss13TC17CT	MS.gene039619	PPR containing protein, putative [Medicago truncatula]	182-199	2.5
gra-MIR8782-p3_2ss13TC17CT	MS.gene024980	uncharacterized protein LOC25494473 [Medicago truncatula]	1002-1019	1.5
gra-MIR8782-p3_2ss13TC17CT	MS.gene87568	uncharacterized protein LOC25498858 isoform X1 [Medicago truncatula]	622-639	2.5
gra-MIR8782-p3_2ss13TC17CT	MS.gene55076	subtilisin-like protease Glyma18g48580 [Medicago truncatula]	1364-1381	2
gra-MIR8782-p3_2ss13TC17CT	MS.gene056469	putative phospholipid-transporting ATPase 9 [Medicago truncatula]	134-151	2
gra-MIR8782-p3_2ss13TC17CT	MS.gene072813	hypothetical protein MTR_0303s0010, partial [Medicago truncatula]	690-707	1.8
gra-MIR8782-p3_2ss13TC17CT	MS.gene28193	hypothetical protein MTR_2g017850 [Medicago truncatula]	160-177	2.2
gra-MIR8782-p3_2ss13TC17CT	MS.gene048401	hypothetical protein MTR_2g017850 [Medicago truncatula]	373-390	2
gra-MIR8782-p3_2ss13TC17CT	MS.gene71188	hypothetical protein MTR_2g017850 [Medicago truncatula]	565-582	2.2
gra-MIR8782-p3_2ss13TC17CT	MS.gene61843	hypothetical protein MTR_0303s0010, partial [Medicago truncatula]	622-639	2.2
gra-MIR8782-p3_2ss13TC17CT	MS.gene20849	uncharacterized protein LOC11416802 [Medicago truncatula]	357-374	2.5
gra-MIR8782-p3_2ss13TC17CT	MS.gene24878	pleiotropic drug resistance protein 1 [Medicago truncatula]	1513-1530	2.5
gra-MIR8782-p3_2ss13TC17CT	MS.gene92730	hypothetical protein MTR_2g017850 [Medicago truncatula]	373-390	2
gra-MIR8782-p3_2ss13TC17CT	MS.gene20844	uncharacterized protein LOC11414442 [Medicago truncatula]	764-781	2.2
gra-MIR8782-p3_2ss13TC17CT	MS.gene038659	hypothetical protein MTR_2g017850 [Medicago truncatula]	406-423	1.8
gra-MIR8782-p3_2ss13TC17CT	MS.gene026810	uncharacterized protein LOC25491356 [Medicago truncatula]	1503-1520	2.2
gra-MIR8782-p3_2ss13TC17CT	MS.gene026809	probable myosin-binding protein 5 [Medicago truncatula]	554-571	2.5
gra-MIR8782-p3_2ss13TC17CT	MS.gene92688	Ulp1 protease family, carboxy-terminal domain protein [Medicago truncatula]	1149-1166	2.5
gra-MIR8782-p3_2ss13TC17CT	MS.gene34799	hydroxyproline O-galactosyltransferase GALT6 [Medicago truncatula]	1681-1698	2
gra-MIR8782-p3_2ss13TC17CT	MS.gene77232	RNA recognition motif [Medicago truncatula]	1199-1216	2.5
gra-MIR8782-p3_2ss13TC17CT	MS.gene91748	hypothetical protein MTR_2g017850 [Medicago truncatula]	70-87	1.8
gra-MIR8782-p3_2ss13TC17CT	MS.gene019069	calmodulin-domain kinase CDPK protein [Medicago truncatula]	328-345	2.5
gra-MIR8782-p3_2ss13TC17CT	MS.gene69501	hypothetical protein MTR_2g017850 [Medicago truncatula]	475-492	2.2
gra-MIR8782-p3_2ss13TC17CT	MS.gene005945	putative pleiotropic drug resistance protein PDR/CDR [Medicago truncatula]	14-31	2
gra-MIR8782-p3_2ss13TC17CT	MS.gene69578	hypothetical protein L195_g057525, partial [Trifolium pratense]	176-193	2
gra-MIR8782-p3_2ss13TC17CT	MS.gene68070	hypothetical protein MtrunA17_Chr5g0405561 [Medicago truncatula]	611-628	2.2
gra-MIR8782-p3_2ss13TC17CT	MS.gene32303	receptor-like serine/threonine-protein kinase SD1-8 [Abrus precatorius]	1504-1521	2.2
gra-MIR8782-p3_2ss13TC17CT	MS.gene82627	RNA recognition motif [Medicago truncatula]	64-81	2.5
gra-MIR8782-p3_2ss13TC17CT	MS.gene06210	hypothetical protein L195_g001543 [Trifolium pratense]	1535-1552	2.5
gra-MIR8782-p3_2ss13TC17CT	MS.gene022995	histone-lysine N-methyltransferase [Medicago truncatula]	49-66	2.5
gra-MIR8782-p3_2ss13TC17CT	MS.gene49082	paramyosin [Medicago truncatula]	140-157	1.8
gra-MIR8782-p3_2ss13TC17CT	MS.gene064532	hypothetical protein MTR_5g058690 [Medicago truncatula]	560-577	2
gra-MIR8782-p3_2ss13TC17CT	MS.gene048907	COP1-interactive protein 1 [Medicago truncatula]	1541-1558	2.5
gra-MIR8782-p3_2ss13TC17CT	MS.gene91385	cysteine-rich receptor-kinase-like protein [Medicago truncatula]	2006-2023	2.5
gra-MIR8782-p3_2ss13TC17CT	MS.gene030538	E3 ubiquitin-protein ligase CHFR isoform X2 [Medicago truncatula]	1308-1325	2
gra-MIR8782-p3_2ss13TC17CT	MS.gene84516	B3 domain-containing protein At1g49475 [Medicago truncatula]	407-424	2.5
gra-MIR8782-p3_2ss13TC17CT	MS.gene029524	sulfhydryl oxidase 2 isoform X1 [Medicago truncatula]	452-469	2.5
gra-MIR8782-p3_2ss13TC17CT	MS.gene04070	alpha-glucan phosphorylase, H isozyme [Medicago truncatula]	1732-1749	2.5
gra-MIR8782-p3_2ss13TC17CT	MS.gene58092	uncharacterized protein LOC11436750 isoform X1 [Medicago truncatula]	35-52	2.5
gra-MIR8782-p3_2ss13TC17CT	MS.gene57684	Ara4-interacting protein [Medicago truncatula]	824-841	2.5
gra-MIR8782-p3_2ss13TC17CT	MS.gene57686	Ara4-interacting protein [Medicago truncatula]	824-841	2.5
gra-MIR8782-p3_2ss13TC17CT	MS.gene71796	hypothetical protein MTR_2g020400 [Medicago truncatula]	413-430	2.5
gra-MIR8782-p3_2ss13TC17CT	MS.gene71796	hypothetical protein MTR_2g020400 [Medicago truncatula]	371-388	2.5
gra-MIR8782-p3_2ss13TC17CT	MS.gene041220	alkane hydroxylase MAH1 [Medicago truncatula]	367-384	2.5
gra-MIR8782-p3_2ss13TC17CT	MS.gene05767	inactive receptor-like serine/threonine-protein kinase At2g40270 [Medicago truncatula]	223-240	2.5
gra-MIR8782-p3_2ss13TC17CT	MS.gene41526	DUF4283 domain protein [Medicago truncatula]	748-765	2.2
gra-MIR8782-p3_2ss13TC17CT	MS.gene41471	hypothetical protein MTR_2g017850 [Medicago truncatula]	691-708	1.8
gra-MIR8782-p3_2ss13TC17CT	MS.gene029124	hypothetical protein MTR_2g020400 [Medicago truncatula]	230-247	2.5
gra-MIR8782-p3_2ss13TC17CT	MS.gene050988	hypothetical protein MTR_2g017850 [Medicago truncatula]	322-339	1.8
gra-MIR8782-p3_2ss13TC17CT	MS.gene008381	putative oligopeptide transporter, OPT superfamily [Medicago truncatula]	326-343	2.2
gra-MIR8782-p3_2ss13TC17CT	MS.gene032550	protein FAR1-related sequence 5-like [Trifolium pratense]	117-134	2.5
gra-MIR8782-p3_2ss13TC17CT	MS.gene88989	Fanconi anemia group J protein homolog isoform X2 [Medicago truncatula]	968-985	2
gra-MIR8782-p3_2ss13TC17CT	MS.gene028223	putative glutamate decarboxylase [Medicago truncatula]	546-563	2.2
gra-MIR8782-p3_2ss13TC17CT	MS.gene057358	rop guanine nucleotide exchange factor 5 [Medicago truncatula]	882-899	2.2
gra-MIR8782-p3_2ss13TC17CT	MS.gene057359	rop guanine nucleotide exchange factor 5 [Medicago truncatula]	885-902	2.2
gra-MIR8782-p3_2ss13TC17CT	MS.gene032038	rop guanine nucleotide exchange factor 5 [Medicago truncatula]	1189-1206	2.2
gra-MIR8782-p3_2ss13TC17CT	MS.gene028250	hypothetical protein MTR_2g017850 [Medicago truncatula]	427-444	2.2
gra-MIR8782-p3_2ss13TC17CT	MS.gene053916	protein CHUP1, chloroplastic [Medicago truncatula]	131-148	2.5
gra-MIR8782-p3_2ss13TC17CT	MS.gene063294	ribonuclease H, partial [Trifolium pratense]	977-994	2.2
gra-MIR8782-p3_2ss13TC17CT	MS.gene011177	inactive protein kinase SELMODRAFT_444075 [Medicago truncatula]	1411-1428	2
gra-MIR8782-p3_2ss13TC17CT	MS.gene011149	hypothetical protein MTR_0019s0170 [Medicago truncatula]	524-541	2.5
gra-MIR8782-p3_2ss13TC17CT	MS.gene035978	hypothetical protein TSUD_397840 [Trifolium subterraneum]	725-742	2
gra-MIR8782-p3_2ss13TC17CT	MS.gene028439	copper-transporting ATPase PAA1, chloroplastic [Medicago truncatula]	5-22	2.5
gra-MIR8782-p3_2ss13TC17CT	MS.gene90174	copper-transporting ATPase PAA1, chloroplastic [Medicago truncatula]	213-230	2.5
gra-MIR8782-p3_2ss13TC17CT	MS.gene001539	copper-transporting ATPase PAA1, chloroplastic [Medicago truncatula]	213-230	2.5
gra-MIR8782-p3_2ss13TC17CT	MS.gene058437	ethylene-responsive transcription factor ERF018 [Medicago truncatula]	185-202	1.5
gra-MIR8782-p3_2ss13TC17CT	MS.gene058440	ethylene-responsive transcription factor ERF018 [Medicago truncatula]	218-235	1.5
gra-MIR8782-p3_2ss13TC17CT	MS.gene020024	ribonuclease H, partial [Trifolium pratense]	2456-2473	2.2
gra-MIR8782-p3_2ss13TC17CT	MS.gene061947	zinc-finger homeodomain protein 2 [Medicago truncatula]	695-712	2.5
gra-MIR8782-p3_2ss13TC17CT	MS.gene052628	vignain [Medicago truncatula]	402-419	2
gra-MIR8782-p3_2ss13TC17CT	MS.gene78715	vignain [Medicago truncatula]	627-644	2
gra-MIR8782-p3_2ss13TC17CT	MS.gene052630	vignain [Medicago truncatula]	627-644	2
gra-MIR8782-p3_2ss13TC17CT	MS.gene51575	pleiotropic drug resistance protein 1 [Medicago truncatula]	1459-1476	2.5
gra-MIR8782-p3_2ss13TC17CT	MS.gene51579	pleiotropic drug resistance protein 1 [Medicago truncatula]	1303-1320	2.5
gra-MIR8782-p3_2ss13TC17CT	MS.gene021620	hypothetical protein TSUD_08700 [Trifolium subterraneum]	1212-1229	2
gra-MIR8782-p3_2ss13TC17CT	MS.gene021616	putative protein kinase RLK-Pelle-WAK family [Medicago truncatula]	1143-1160	2
gra-MIR8782-p3_2ss13TC17CT	MS.gene39532	isoflavone 4'-O-methyltransferase isoform X2 [Medicago truncatula]	411-428	1.8
gra-MIR8782-p3_2ss13TC17CT	MS.gene97854	protein ANTAGONIST OF LIKE HETEROCHROMATIN PROTEIN 1-like [Arachis ipaensis]	224-241	2.5
gra-MIR8782-p3_2ss13TC17CT	MS.gene39571	putative formin, FH2 domain-containing protein [Medicago truncatula]	2339-2356	2.5
gra-MIR8782-p3_2ss13TC17CT	MS.gene39576	probable phosphoinositide phosphatase SAC9 [Medicago truncatula]	5288-5305	2.5
gra-MIR8782-p3_2ss13TC17CT	MS.gene021459	probable pectinesterase/pectinesterase inhibitor 61 [Medicago truncatula]	1403-1420	2.5
gra-MIR8782-p3_2ss13TC17CT	MS.gene021459	probable pectinesterase/pectinesterase inhibitor 61 [Medicago truncatula]	772-789	2.2
gra-MIR8782-p3_2ss13TC17CT	MS.gene021455	uncharacterized protein LOC11429788 [Medicago truncatula]	2011-2028	2.5
gra-MIR8782-p3_2ss13TC17CT	MS.gene009856	cytochrome P450 CYP736A12 [Medicago truncatula]	551-568	2.5
gra-MIR8782-p3_2ss13TC17CT	MS.gene037880	hypothetical protein MTR_2g017850 [Medicago truncatula]	691-708	1.8
gra-MIR8782-p3_2ss13TC17CT	MS.gene000254	Ulp1 protease family, carboxy-terminal domain protein [Medicago truncatula]	1134-1151	2.5
gra-MIR8782-p3_2ss13TC17CT	MS.gene32396	putative glycerophosphodiester phosphodiesterase, protein kinase RLK-Pelle-LRK10L-2 family [Medicago truncatula]	688-705	2.5
gra-MIR8782-p3_2ss13TC17CT	MS.gene43435	uncharacterized protein LOC25494330 [Medicago truncatula]	484-501	2.5
gra-MIR8782-p3_2ss13TC17CT	MS.gene68931	LOW QUALITY PROTEIN: 1-aminocyclopropane-1-carboxylate oxidase [Medicago truncatula]	21-38	2.2
gra-MIR8782-p3_2ss13TC17CT	MS.gene68932	LOW QUALITY PROTEIN: 1-aminocyclopropane-1-carboxylate oxidase [Medicago truncatula]	132-149	2.2
gra-MIR8782-p3_2ss13TC17CT	MS.gene68872	LOW QUALITY PROTEIN: 1-aminocyclopropane-1-carboxylate oxidase [Medicago truncatula]	21-38	2.2
gra-MIR8782-p3_2ss13TC17CT	MS.gene009645	uncharacterized protein LOC11430051 [Medicago truncatula]	452-469	2.5
gra-MIR8782-p3_2ss13TC17CT	MS.gene035557	Ulp1 protease family, carboxy-terminal domain protein [Medicago truncatula]	1176-1193	2.5
gra-MIR8782-p3_2ss13TC17CT	MS.gene031502	G-type lectin S-receptor-like serine/threonine-protein kinase At4g27290 [Medicago truncatula]	1765-1782	2.2
gra-MIR8782-p3_2ss13TC17CT	MS.gene072439	piezo-type mechanosensitive ion channel homolog isoform X1 [Medicago truncatula]	2864-2881	2.5
gra-MIR8782-p3_2ss13TC17CT	MS.gene29477	Ulp1 protease family, carboxy-terminal domain protein [Medicago truncatula]	1176-1193	2.5
gra-MIR8782-p3_2ss13TC17CT	MS.gene061046	DUF4283 domain protein [Medicago truncatula]	736-753	1.8
gra-MIR8782-p3_2ss13TC17CT	MS.gene061100	plectin [Medicago truncatula]	2330-2347	2.5
gra-MIR8782-p3_2ss13TC17CT	MS.gene026358	protein PHR1-LIKE 3 [Medicago truncatula]	236-253	2.5
gra-MIR8782-p3_2ss13TC17CT	MS.gene026420	protein PHR1-LIKE 3 [Medicago truncatula]	236-253	2.5
gra-MIR8782-p3_2ss13TC17CT	MS.gene045519	hypothetical protein MTR_2g020400 [Medicago truncatula]	143-160	2.5
gra-MIR8782-p3_2ss13TC17CT	MS.gene031607	Ulp1 protease family, carboxy-terminal domain protein [Medicago truncatula]	1176-1193	2.5
gra-MIR8782-p3_2ss13TC17CT	MS.gene80795	uncharacterized protein LOC11413741 [Medicago truncatula]	863-880	2
gra-MIR8782-p3_2ss13TC17CT	MS.gene96152	nucleolin 1 isoform X2 [Medicago truncatula]	1319-1336	1.8
gra-MIR8782-p3_2ss13TC17CT	MS.gene29717	Ulp1 protease family, carboxy-terminal domain protein [Medicago truncatula]	1212-1229	2.2
gra-MIR8782-p3_2ss13TC17CT	MS.gene012330	mannosyl-oligosaccharide 1,2-alpha-mannosidase MNS1 isoform X1 [Medicago truncatula]	1305-1322	2.5
gra-MIR8782-p3_2ss13TC17CT	MS.gene88567	myosin heavy chain [Medicago truncatula]	2150-2167	2.5
gra-MIR8782-p3_2ss13TC17CT	MS.gene37892	hypothetical protein TSUD_284780 [Trifolium subterraneum]	593-610	2.5
gra-MIR8782-p3_2ss13TC17CT	MS.gene37892	hypothetical protein TSUD_284780 [Trifolium subterraneum]	551-568	2.5
gra-MIR8782-p3_2ss13TC17CT	MS.gene37888	ribonuclease H, partial [Trifolium pratense]	1613-1630	2.5
gra-MIR8782-p3_2ss13TC17CT	MS.gene37888	ribonuclease H, partial [Trifolium pratense]	1571-1588	2.5
gra-MIR8782-p3_2ss13TC17CT	MS.gene90964	probable magnesium transporter NIPA6 [Medicago truncatula]	887-904	2.5
gra-MIR8782-p3_2ss13TC17CT	MS.gene049309	hypothetical protein MTR_2g020400 [Medicago truncatula]	482-499	2.5
gra-MIR8782-p3_2ss13TC17CT	MS.gene049309	hypothetical protein MTR_2g020400 [Medicago truncatula]	440-457	2.5
gra-MIR8782-p3_2ss13TC17CT	MS.gene007463	hypothetical protein MtrunA17_Chr7g0263671 [Medicago truncatula]	2284-2301	2.5
gra-MIR8782-p3_2ss13TC17CT	MS.gene003808	E3 ubiquitin-protein ligase ARI3, putative [Medicago truncatula]	1130-1147	2.5
gra-MIR8782-p3_2ss13TC17CT	MS.gene06263	putative alpha-mannosidase [Glycine soja]	3621-3638	2.5
gra-MIR8782-p3_2ss13TC17CT	MS.gene43369	chromosome transmission fidelity protein 18 homolog [Medicago truncatula]	2725-2742	1.8
gra-MIR8782-p3_2ss13TC17CT	MS.gene003864	uncharacterized protein LOC11416828 isoform X2 [Medicago truncatula]	1064-1081	2.5
gra-MIR8782-p3_2ss13TC17CT	MS.gene017180	peptide methionine sulfoxide reductase A1 isoform X1 [Medicago truncatula]	635-652	2.5
gra-MIR8782-p3_2ss13TC17CT	MS.gene59052	mediator of RNA polymerase II transcription subunit 17 [Medicago truncatula]	936-953	2.5
gra-MIR8782-p3_2ss13TC17CT	MS.gene48473	gamma-tubulin complex component 5 isoform X1 [Medicago truncatula]	1714-1731	2.2
gra-MIR8782-p3_2ss13TC17CT	MS.gene068141	hypothetical protein MTR_2g017850 [Medicago truncatula]	406-423	1.8
gra-MIR8782-p3_2ss13TC17CT	MS.gene035513	putative TIR domain, winged helix-turn-helix DNA-binding domain-containing protein [Medicago truncatula]	712-729	2.2
gra-MIR8782-p3_2ss13TC17CT	MS.gene50470	pentatricopeptide repeat-containing protein At4g21880, mitochondrial isoform X1 [Medicago truncatula]	140-157	2.5
gra-MIR8782-p3_2ss13TC17CT	MS.gene033003	putative phospholipid-transporting ATPase 9 [Medicago truncatula]	1819-1836	1.5
gra-MIR8782-p3_2ss13TC17CT	MS.gene38209	hypothetical protein MTR_2g017850 [Medicago truncatula]	745-762	2.2
gra-MIR8782-p3_2ss13TC17CT	MS.gene38208	hypothetical protein MTR_2g017850 [Medicago truncatula]	745-762	2.2
gra-MIR8782-p3_2ss13TC17CT	MS.gene78651	hypothetical protein MTR_0303s0010, partial [Medicago truncatula]	370-387	2.2
gra-MIR8782-p3_2ss13TC17CT	MS.gene034539	putative pectinesterase [Medicago truncatula]	61-78	2
gra-MIR8782-p3_2ss13TC17CT	MS.gene034559	putative pectinesterase [Medicago truncatula]	526-543	2.5
gra-MIR8782-p3_2ss13TC17CT	MS.gene046959	uncharacterized protein LOC25494473 [Medicago truncatula]	1182-1199	1.5
gra-MIR8782-p3_2ss13TC17CT	MS.gene40840	DUF4283 domain protein [Medicago truncatula]	265-282	1.8
gra-MIR8782-p3_2ss13TC17CT	MS.gene034672	DUF4283 domain protein [Medicago truncatula]	1009-1026	1.8
gra-MIR8782-p3_2ss13TC17CT	MS.gene43250	hypothetical protein MTR_0303s0010, partial [Medicago truncatula]	579-596	2.2
gra-MIR8782-p3_2ss13TC17CT	MS.gene03820	fatty acyl-CoA reductase 3 [Medicago truncatula]	623-640	1.8
gra-MIR8782-p3_2ss13TC17CT	MS.gene067733	transcription factor TGA9 [Medicago truncatula]	461-478	2.2
gra-MIR8782-p3_2ss13TC17CT	MS.gene067760	hypothetical protein MTR_0303s0010, partial [Medicago truncatula]	583-600	1.8
gra-MIR8782-p3_2ss13TC17CT	MS.gene98631	Ulp1 protease family, carboxy-terminal domain protein [Medicago truncatula]	1176-1193	2.5
gra-MIR8782-p3_2ss13TC17CT	MS.gene027447	coiled-coil domain-containing protein 39 [Medicago truncatula]	18-35	2.5
gra-MIR8782-p3_2ss13TC17CT	MS.gene46386	novel plant SNARE 11 [Medicago truncatula]	760-777	2.5
gra-MIR8782-p3_2ss13TC17CT	MS.gene064167	hypothetical protein MTR_2g017850 [Medicago truncatula]	124-141	2.2
gra-MIR8782-p3_2ss13TC17CT	MS.gene064166	hypothetical protein MTR_2g017850 [Medicago truncatula]	424-441	2.2
gra-MIR8782-p3_2ss13TC17CT	MS.gene46336	transcription factor bHLH19 [Medicago truncatula]	563-580	2.5
gra-MIR8782-p3_2ss13TC17CT	MS.gene99224	filament-like plant protein 7 [Medicago truncatula]	2441-2458	2.2
gra-MIR8782-p3_2ss13TC17CT	MS.gene014473	papain family cysteine protease [Medicago truncatula]	724-741	1.8
gra-MIR8782-p3_2ss13TC17CT	MS.gene28583	probable disease resistance protein At5g66900 [Medicago truncatula]	314-331	2
gra-MIR8782-p3_2ss13TC17CT	MS.gene28580	probable disease resistance protein At5g66900 [Medicago truncatula]	314-331	2
gra-MIR8782-p3_2ss13TC17CT	MS.gene065444	copine protein, putative [Medicago truncatula]	1679-1696	2.5
gra-MIR8782-p3_2ss13TC17CT	MS.gene28551	probable copper-transporting ATPase HMA5 isoform X1 [Medicago truncatula]	863-880	2
gra-MIR8782-p3_2ss13TC17CT	MS.gene014428	uncharacterized protein LOC11426828 isoform X1 [Medicago truncatula]	203-220	2
gra-MIR8782-p3_2ss13TC17CT	MS.gene85061	hypothetical protein MTR_0303s0010, partial [Medicago truncatula]	358-375	2.2
gra-MIR8782-p3_2ss13TC17CT	MS.gene79283	hypothetical protein MTR_2g017850 [Medicago truncatula]	211-228	2.2
gra-MIR8782-p3_2ss13TC17CT	MS.gene85026	Ulp1 protease family, carboxy-terminal domain protein [Medicago truncatula]	1149-1166	2.5
gra-MIR8782-p3_2ss13TC17CT	MS.gene39925	Ulp1 protease family, carboxy-terminal domain protein [Medicago truncatula]	1149-1166	2.5
gra-MIR8782-p3_2ss13TC17CT	MS.gene012104	DUF4283 domain protein [Medicago truncatula]	1214-1231	2.2
gra-MIR8782-p3_2ss13TC17CT	MS.gene23767	retrovirus-related Pol polyprotein from transposon TNT 1-94, partial [Trifolium pratense]	224-241	2.5
gra-MIR8782-p3_2ss13TC17CT	MS.gene009300	DNA mismatch repair protein MLH1 [Medicago truncatula]	1900-1917	2.5
gra-MIR8782-p3_2ss13TC17CT	MS.gene004802	uncharacterized protein LOC11429573 [Medicago truncatula]	1070-1087	2.5
gra-MIR8782-p3_2ss13TC17CT	MS.gene004804	uncharacterized protein LOC11429573 [Medicago truncatula]	1055-1072	2.5
gra-MIR8782-p3_2ss13TC17CT	MS.gene004819	cytoplasmic-like aconitate hydratase [Medicago truncatula]	1647-1664	2.5
gra-MIR8782-p3_2ss13TC17CT	MS.gene004849	putative E3 ubiquitin-protein ligase XBAT35 [Medicago truncatula]	1187-1204	2.2
gra-MIR8782-p3_2ss13TC17CT	MS.gene058402	uncharacterized protein LOC112420368 [Medicago truncatula]	971-988	2.5
gra-MIR8782-p3_2ss13TC17CT	MS.gene59474	hypothetical protein MtrunA17_Chr5g0405561 [Medicago truncatula]	611-628	2.2
gra-MIR8782-p3_2ss13TC17CT	MS.gene97929	hypothetical protein MTR_2g017850 [Medicago truncatula]	673-690	1.8
gra-MIR8782-p3_2ss13TC17CT	MS.gene42116	hypothetical protein MTR_2g017850 [Medicago truncatula]	613-630	1.8
gra-MIR8782-p3_2ss13TC17CT	MS.gene048333	homeobox domain, ZF-HD class protein [Medicago truncatula]	1517-1534	2
gra-MIR8782-p3_2ss13TC17CT	MS.gene07604	uncharacterized protein LOC11420825 [Medicago truncatula]	358-375	2.5
gra-MIR8782-p3_2ss13TC17CT	MS.gene005051	uncharacterized protein LOC11420825 [Medicago truncatula]	40-57	2.5
gra-MIR8782-p3_2ss13TC17CT	MS.gene058779	uncharacterized protein LOC11420825 [Medicago truncatula]	249-266	2.5
gra-MIR8782-p3_2ss13TC17CT	MS.gene058776	uncharacterized protein LOC11420825 [Medicago truncatula]	249-266	2.5
gra-MIR8782-p3_2ss13TC17CT	MS.gene98458	uncharacterized protein LOC112421788 [Medicago truncatula]	42-59	2
gra-MIR8782-p3_2ss13TC17CT	MS.gene63255	hypothetical protein MTR_2g017850 [Medicago truncatula]	730-747	1.8
gra-MIR8782-p3_2ss13TC17CT	MS.gene07335	Ulp1 protease family, carboxy-terminal domain protein [Medicago truncatula]	1110-1127	2.5
gra-MIR8782-p3_2ss13TC17CT	MS.gene07277	uncharacterized protein LOC11416802 [Medicago truncatula]	357-374	2.5
gra-MIR8782-p3_2ss13TC17CT	MS.gene07272	uncharacterized protein LOC11414442 [Medicago truncatula]	1286-1303	2.2
gra-MIR8782-p3_2ss13TC17CT	MS.gene33404	hypothetical protein MTR_0303s0010, partial [Medicago truncatula]	595-612	1.8
gra-MIR8782-p3_2ss13TC17CT	MS.gene07242	hypothetical protein MtrunA17_Chr1g0195171 [Medicago truncatula]	774-791	2
gra-MIR8782-p3_2ss13TC17CT	MS.gene07234	probable pectinesterase/pectinesterase inhibitor 7 isoform X1 [Medicago truncatula]	667-684	2
gra-MIR8782-p3_2ss13TC17CT	MS.gene07232	probable pectinesterase/pectinesterase inhibitor 7 isoform X1 [Medicago truncatula]	667-684	2
gra-MIR8782-p3_2ss13TC17CT	MS.gene44282	Ulp1 protease family, carboxy-terminal domain protein [Medicago truncatula]	1176-1193	2.5
gra-MIR8782-p3_2ss13TC17CT	MS.gene34201	Ulp1 protease family, carboxy-terminal domain protein [Medicago truncatula]	1176-1193	2.5
gra-MIR8782-p3_2ss13TC17CT	MS.gene07168	hypothetical protein MTR_2g020400 [Medicago truncatula]	371-388	2.5
gra-MIR8782-p3_2ss13TC17CT	MS.gene79513	pleiotropic drug resistance protein 1 [Medicago truncatula]	1513-1530	2.5
gra-MIR8782-p3_2ss13TC17CT	MS.gene79508	uncharacterized protein LOC25491356 [Medicago truncatula]	1455-1472	2.2
gra-MIR8782-p3_2ss13TC17CT	MS.gene070343	Ulp1 protease family, carboxy-terminal domain protein [Medicago truncatula]	1176-1193	2.5
gra-MIR8782-p3_2ss13TC17CT	MS.gene058165	putative pleiotropic drug resistance protein PDR/CDR [Medicago truncatula]	14-31	2
gra-MIR8782-p3_2ss13TC17CT	MS.gene056142	glyoxylate/succinic semialdehyde reductase 1 [Medicago truncatula]	677-694	2.5
gra-MIR8782-p3_2ss13TC17CT	MS.gene056131	hypothetical protein MTR_2g017850 [Medicago truncatula]	523-540	1.8
gra-MIR8782-p3_2ss13TC17CT	MS.gene066914	hypothetical protein MTR_0303s0010, partial [Medicago truncatula]	322-339	1.8
gra-MIR8782-p3_2ss13TC17CT	MS.gene63572	hypothetical protein MtrunA17_Chr4g0021281 [Medicago truncatula]	743-760	2.5
gra-MIR8782-p3_2ss13TC17CT	MS.gene95861	hypothetical protein MTR_2g017850 [Medicago truncatula]	406-423	2.2
gra-MIR8782-p3_2ss13TC17CT	MS.gene97460	hypothetical protein MTR_2g017850 [Medicago truncatula]	745-762	2.2
gra-MIR8782-p3_2ss13TC17CT	MS.gene006202	putative chitinase [Medicago truncatula]	662-679	2.5
gra-MIR8782-p3_2ss13TC17CT	MS.gene054919	hypothetical protein TSUD_397840 [Trifolium subterraneum]	734-751	2.5
gra-MIR8782-p3_2ss13TC17CT	MS.gene53433	calmodulin-domain kinase CDPK protein [Medicago truncatula]	328-345	2.5
gra-MIR8782-p3_2ss13TC17CT	MS.gene044589	alkane hydroxylase MAH1 [Medicago truncatula]	367-384	2.5
gra-MIR8782-p3_2ss13TC17CT	MS.gene41427	paramyosin [Medicago truncatula]	140-157	1.8
gra-MIR8782-p3_2ss13TC17CT	MS.gene55850	hypothetical protein L195_g001543 [Trifolium pratense]	1535-1552	2.5
gra-MIR8782-p3_2ss13TC17CT	MS.gene62595	hypothetical protein MTR_0303s0010, partial [Medicago truncatula]	673-690	1.8
gra-MIR8782-p3_2ss13TC17CT	MS.gene55791	hypothetical protein MTR_0019s0170 [Medicago truncatula]	458-475	2.5
gra-MIR8782-p3_2ss13TC17CT	MS.gene55777	COP1-interactive protein 1 [Medicago truncatula]	1541-1558	2.5
gra-MIR8782-p3_2ss13TC17CT	MS.gene78724	protein CHUP1, chloroplastic [Medicago truncatula]	131-148	2.5
gra-MIR8782-p3_2ss13TC17CT	MS.gene36880	Ara4-interacting protein [Medicago truncatula]	824-841	2.5
gra-MIR8782-p3_2ss13TC17CT	MS.gene070171	endonuclease/exonuclease/phosphatase family protein [Medicago truncatula]	64-81	2.5
gra-MIR8782-p3_2ss13TC17CT	MS.gene000675	cysteine-rich receptor-kinase-like protein [Medicago truncatula]	1205-1222	2.5
gra-MIR8782-p3_2ss13TC17CT	MS.gene000672	cysteine-rich receptor-kinase-like protein [Medicago truncatula]	1847-1864	2.5
gra-MIR8782-p3_2ss13TC17CT	MS.gene94103	RNA recognition motif 3 in plant MEI2-like protein [Medicago truncatula]	191-208	2.5
gra-MIR8782-p3_2ss13TC17CT	MS.gene000393	E3 ubiquitin-protein ligase CHFR isoform X2 [Medicago truncatula]	1302-1319	2
gra-MIR8782-p3_2ss13TC17CT	MS.gene035802	putative bark agglutinin LECRPA3 [Medicago truncatula]	400-417	2.5
gra-MIR8782-p3_2ss13TC17CT	MS.gene030640	uncharacterized protein LOC11436750 isoform X1 [Medicago truncatula]	35-52	2.5
gra-MIR8782-p3_2ss13TC17CT	MS.gene050055	cysteine desulfurase mitochondrial-like, partial [Trifolium pratense]	353-370	2.5
gra-MIR8782-p3_2ss13TC17CT	MS.gene050020	zinc-finger homeodomain protein 2 [Medicago truncatula]	695-712	2.5
gra-MIR8782-p3_2ss13TC17CT	MS.gene064314	hypothetical protein MTR_0303s0010, partial [Medicago truncatula]	664-681	2.2
gra-MIR8782-p3_2ss13TC17CT	MS.gene81043	pectinesterase [Medicago truncatula]	392-409	2.5
gra-MIR8782-p3_2ss13TC17CT	MS.gene81043	pectinesterase [Medicago truncatula]	46-63	2.5
gra-MIR8782-p3_2ss13TC17CT	MS.gene04116	putative transcription factor B3-Domain family [Medicago truncatula]	131-148	2.5
gra-MIR8782-p3_2ss13TC17CT	MS.gene05625	alpha-glucan phosphorylase, H isozyme [Medicago truncatula]	1732-1749	2.5
gra-MIR8782-p3_2ss13TC17CT	MS.gene53362	Ulp1 protease family, carboxy-terminal domain protein [Medicago truncatula]	1176-1193	2.5
gra-MIR8782-p3_2ss13TC17CT	MS.gene03934	hypothetical protein MtrunA17_Chr3g0105741 [Medicago truncatula]	122-139	2.5
gra-MIR8782-p3_2ss13TC17CT	MS.gene020264	inactive protein kinase SELMODRAFT_444075 [Medicago truncatula]	1411-1428	2.5
gra-MIR8782-p3_2ss13TC17CT	MS.gene36591	hypothetical protein MTR_2g017850 [Medicago truncatula]	382-399	1.8
gra-MIR8782-p3_2ss13TC17CT	MS.gene08441	hypothetical protein MTR_0019s0170 [Medicago truncatula]	554-571	2.5
gra-MIR8782-p3_2ss13TC17CT	MS.gene49198	UDP-glycosyltransferase 87A1 [Medicago truncatula]	224-241	2.5
gra-MIR8782-p3_2ss13TC17CT	MS.gene023240	putative glutamate decarboxylase [Medicago truncatula]	546-563	2.2
gra-MIR8782-p3_2ss13TC17CT	MS.gene049606	KH domain-containing protein At3g08620 isoform X1 [Medicago truncatula]	718-735	2.5
gra-MIR8782-p3_2ss13TC17CT	MS.gene049639	putative oligopeptide transporter, OPT superfamily [Medicago truncatula]	326-343	2.2
gra-MIR8782-p3_2ss13TC17CT	MS.gene049641	putative oligopeptide transporter, OPT superfamily [Medicago truncatula]	326-343	2.2
gra-MIR8782-p3_2ss13TC17CT	MS.gene049643	putative oligopeptide transporter, OPT superfamily [Medicago truncatula]	326-343	2.2
gra-MIR8782-p3_2ss13TC17CT	MS.gene049645	putative oligopeptide transporter, OPT superfamily [Medicago truncatula]	326-343	2.2
gra-MIR8782-p3_2ss13TC17CT	MS.gene80595	helicase-like protein [Trifolium pratense]	148-165	2
gra-MIR8782-p3_2ss13TC17CT	MS.gene80627	hypothetical protein MTR_0019s0170 [Medicago truncatula]	476-493	2.5
gra-MIR8782-p3_2ss13TC17CT	MS.gene80668	uncharacterized protein LOC11413741 [Medicago truncatula]	863-880	2
gra-MIR8782-p3_2ss13TC17CT	MS.gene022624	SKP1 family, tetramerization domain protein [Medicago truncatula]	502-519	2
gra-MIR8782-p3_2ss13TC17CT	MS.gene70369	copper-transporting ATPase PAA1, chloroplastic [Medicago truncatula]	648-665	2.5
gra-MIR8782-p3_2ss13TC17CT	MS.gene052543	ribosomal RNA-processing protein 17 [Medicago truncatula]	164-181	2.5
mtr-MIR5258-p3_1ss11AG	MS.gene97317	hypothetical protein MtrunA17_Chr7g0247701 [Medicago truncatula]	756-775	2.5
mtr-MIR5258-p3_1ss11AG	MS.gene66633	putative disease resistance RPP13-like protein 1 [Medicago truncatula]	749-769	1
mtr-MIR5258-p3_1ss11AG	MS.gene52166	hypothetical protein MtrunA17_Chr7g0247701 [Medicago truncatula]	747-766	2
mtr-MIR5258-p3_1ss11AG	MS.gene52163	Protein of unknown function DUF295 [Medicago truncatula]	747-766	2.5
mtr-MIR5258-p3_1ss11AG	MS.gene070463	putative P-loop containing nucleoside triphosphate hydrolase, leucine-rich repeat domain, L [Medicago truncatula]	977-997	2
mtr-MIR5258-p3_1ss11AG	MS.gene95450	hypothetical protein MtrunA17_Chr7g0247701 [Medicago truncatula]	759-778	2.5
mtr-MIR5258-p3_1ss11AG	MS.gene66851	putative disease resistance RPP13-like protein 1 [Medicago truncatula]	1181-1201	1
mtr-MIR5258-p3_1ss11AG	MS.gene034178	kelch repeat-containing protein At3g27220 [Medicago truncatula]	430-450	2.5
mtr-MIR5258-p3_1ss11AG	MS.gene77859	putative P-loop containing nucleoside triphosphate hydrolase, leucine-rich repeat domain, L [Medicago truncatula]	752-772	2
mtr-MIR5258-p3_1ss11AG	MS.gene069616	putative disease resistance RPP13-like protein 1 [Medicago truncatula]	1121-1141	0.8
mtr-MIR5258-p3_1ss11AG	MS.gene066424	putative disease resistance protein At3g14460 [Medicago truncatula]	1205-1225	0
mtr-MIR5258-p3_1ss11AG	MS.gene023787	Protein of unknown function DUF295 [Medicago truncatula]	603-622	2
mtr-MIR5258-p3_1ss11AG	MS.gene023786	Protein of unknown function DUF295 [Medicago truncatula]	171-190	2.5
mtr-MIR5258-p3_1ss11AG	MS.gene023785	Protein of unknown function DUF295 [Medicago truncatula]	747-766	2.5
mtr-MIR5258-p3_1ss11AG	MS.gene023784	hypothetical protein MtrunA17_Chr7g0247701 [Medicago truncatula]	750-769	2
mtr-MIR5258-p3_1ss11AG	MS.gene015599	NB-ARC domain disease resistance protein [Medicago truncatula]	1139-1159	0.5
mtr-MIR5258-p3_1ss11AG	MS.gene019633	putative disease resistance protein At3g14460 [Medicago truncatula]	1205-1225	0
mtr-MIR5258-p3_1ss11AG	MS.gene019634	putative disease resistance protein At3g14460 [Medicago truncatula]	1205-1225	1
mtr-MIR5258-p3_1ss11AG	MS.gene022086	hypothetical protein MtrunA17_Chr7g0247701 [Medicago truncatula]	756-775	2.5
mtr-MIR5258-p3_1ss11AG	MS.gene27639	hypothetical protein MtrunA17_Chr7g0247701 [Medicago truncatula]	741-760	2
mtr-MIR5258-p3_1ss11AG	MS.gene27637	hypothetical protein MtrunA17_Chr7g0247701 [Medicago truncatula]	744-763	2.5
mtr-MIR5258-p3_1ss11AG	MS.gene27636	Protein of unknown function DUF295 [Medicago truncatula]	747-766	2.5
mtr-MIR5258-p3_1ss11AG	MS.gene27635	hypothetical protein MtrunA17_Chr7g0247701 [Medicago truncatula]	750-769	2
mtr-MIR5258-p3_1ss11AG	MS.gene000034	putative P-loop containing nucleoside triphosphate hydrolase, leucine-rich repeat domain, L [Medicago truncatula]	1208-1228	2
mtr-MIR5258-p3_1ss11AG	MS.gene93998	putative disease resistance RPP13-like protein 1 [Medicago truncatula]	1121-1141	0.8
mtr-MIR5258-p3_1ss11AG	MS.gene054558	kelch repeat-containing protein At3g27220 [Medicago truncatula]	430-450	2.5
mtr-MIR5258-p3_1ss11AG	MS.gene62633	NB-ARC domain disease resistance protein [Medicago truncatula]	1139-1159	0.5
mtr-MIR5258-p3_1ss11AG	MS.gene43191	hypothetical protein MtrunA17_Chr7g0247701 [Medicago truncatula]	759-778	2.5
mtr-MIR5258-p3_1ss11AG	MS.gene061281	putative disease resistance RPP13-like protein 1 [Medicago truncatula]	1181-1201	1
mtr-MIR5258-p3_1ss11AG	MS.gene42226	hypothetical protein MtrunA17_Chr7g0247701 [Medicago truncatula]	636-655	2
mtr-MIR5258-p3_1ss11AG	MS.gene42225	Protein of unknown function DUF295 [Medicago truncatula]	171-190	2.5
mtr-MIR5258-p3_1ss11AG	MS.gene42224	hypothetical protein MtrunA17_Chr7g0246641 [Medicago truncatula]	441-460	2.5
mtr-MIR5258-p3_1ss11AG	MS.gene42223	Protein of unknown function DUF295 [Medicago truncatula]	747-766	2.5
mtr-MIR5258-p3_1ss11AG	MS.gene053167	kelch repeat-containing protein At3g27220 [Medicago truncatula]	430-450	2.5
mtr-MIR5258-p3_1ss11AG	MS.gene63659	putative P-loop containing nucleoside triphosphate hydrolase, leucine-rich repeat domain, L [Medicago truncatula]	977-997	2
mtr-MIR5258-p3_1ss11AG	MS.gene056782	putative disease resistance protein At3g14460 [Medicago truncatula]	1205-1225	0
mtr-MIR5258-p3_1ss11AG	MS.gene056783	putative disease resistance protein At3g14460 [Medicago truncatula]	1205-1225	0.2
PC-3p-75449_67	MS.gene065692	RecName: Full=Probable cinnamyl alcohol dehydrogenase; Short=CAD	585-605	2.5
PC-3p-75449_67	MS.gene39870	receptor-like protein 7 [Medicago truncatula]	2676-2696	2.5
PC-3p-75449_67	MS.gene39859	receptor-like protein 7 [Medicago truncatula]	927-947	2.5
PC-3p-75449_67	MS.gene39858	LRR receptor-like kinase, putative [Medicago truncatula]	1773-1793	2.5
PC-3p-75449_67	MS.gene39856	putative leucine-rich repeat-containing, plant-type, leucine-rich repeat domain, L [Medicago truncatula]	963-983	2.5
PC-3p-75449_67	MS.gene020957	probable inactive tRNA-specific adenosine deaminase-like protein 3 [Medicago truncatula]	344-364	2.5
PC-3p-75449_67	MS.gene66787	fatty acyl-CoA reductase 3 [Medicago truncatula]	669-689	2.5
PC-3p-75449_67	MS.gene019975	uncharacterized protein LOC25495897 [Medicago truncatula]	1413-1433	2.5
PC-3p-75449_67	MS.gene83254	protein RTF1 homolog [Medicago truncatula]	453-473	2.5
PC-3p-75449_67	MS.gene055939	protein DOS2 [Medicago truncatula]	809-828	2.5
PC-3p-75449_67	MS.gene47870	hypothetical protein TSUD_80320 [Trifolium subterraneum]	232-252	2
PC-3p-75449_67	MS.gene47869	protein MET1, chloroplastic [Medicago truncatula]	220-240	2.5
PC-3p-75449_67	MS.gene01135	7-deoxyloganetin glucosyltransferase [Medicago truncatula]	1091-1110	2.5
PC-3p-75449_67	MS.gene91643	DUF4283 domain protein [Medicago truncatula]	271-290	2.5
PC-3p-75449_67	MS.gene78096	fatty acyl-CoA reductase 3 [Medicago truncatula]	669-689	2.5
PC-3p-75449_67	MS.gene49339	probable WRKY transcription factor 21 [Medicago truncatula]	817-836	2.5
PC-3p-75449_67	MS.gene060782	protein RTF1 homolog [Medicago truncatula]	453-473	2
PC-3p-75449_67	MS.gene44427	uncharacterized protein DDB_G0290685 [Medicago truncatula]	754-774	2.5
PC-3p-75449_67	MS.gene74633	uncharacterized protein LOC25495896 [Medicago truncatula]	4329-4349	2.5
PC-3p-75449_67	MS.gene51689	hypothetical protein L195_g042130 [Trifolium pratense]	90-110	1.5
PC-3p-75449_67	MS.gene002167	Soyasaponin III rhamnosyltransferase [Mucuna pruriens]	1229-1248	2.5
PC-3p-75449_67	MS.gene71681	RecName: Full=Probable cinnamyl alcohol dehydrogenase; Short=CAD	585-605	2.5
PC-3p-75449_67	MS.gene97260	uncharacterized protein LOC25495897 [Medicago truncatula]	162-182	2.5
PC-3p-75449_67	MS.gene65232	uncharacterized protein LOC25495897 [Medicago truncatula]	1188-1208	2.5
PC-3p-75449_67	MS.gene067513	hypothetical protein L195_g042130 [Trifolium pratense]	846-866	1.5
PC-3p-75449_67	MS.gene067511	hypothetical protein L195_g042130 [Trifolium pratense]	846-866	1.5
PC-3p-75449_67	MS.gene73174	hypothetical protein L195_g042130 [Trifolium pratense]	846-866	1.5
PC-3p-75449_67	MS.gene45154	uncharacterized protein LOC11405999 [Medicago truncatula]	811-831	2.5
PC-3p-75449_67	MS.gene040531	cyclin-T1-5 isoform X1 [Medicago truncatula]	1459-1479	2.2
PC-3p-75449_67	MS.gene022829	copper-transporting ATPase HMA4 [Medicago truncatula]	379-398	2.5
PC-3p-75449_67	MS.gene81567	receptor-like protein 7 [Medicago truncatula]	2448-2468	2.5
PC-3p-75449_67	MS.gene81564	hypothetical protein TSUD_250460 [Trifolium subterraneum]	1572-1592	2.5
PC-3p-75449_67	MS.gene81559	hypothetical protein TSUD_250180 [Trifolium subterraneum]	1227-1247	2.5
PC-3p-75449_67	MS.gene81554	receptor-like protein 9DC3 [Medicago truncatula]	2286-2306	2.5
PC-3p-75449_67	MS.gene81551	putative leucine-rich repeat domain, L domain-containing protein [Medicago truncatula]	2670-2690	2.5
PC-3p-75449_67	MS.gene81550	putative leucine-rich repeat-containing, plant-type, leucine-rich repeat domain, L [Medicago truncatula]	657-677	2.5
PC-3p-75449_67	MS.gene50585	probable WRKY transcription factor 21 [Medicago truncatula]	808-827	2.5
PC-3p-75449_67	MS.gene018051	protein DOS2 [Medicago truncatula]	809-828	2.5
PC-3p-75449_67	MS.gene60163	uncharacterized protein DDB_G0290685 [Medicago truncatula]	754-774	2.5
PC-3p-75449_67	MS.gene017687	uncharacterized protein LOC11422184 [Medicago truncatula]	589-609	2.5
PC-3p-75449_67	MS.gene047091	Soyasaponin III rhamnosyltransferase [Mucuna pruriens]	1229-1248	2.5
PC-3p-75449_67	MS.gene062516	probable inactive tRNA-specific adenosine deaminase-like protein 3 [Medicago truncatula]	344-364	2.5
PC-3p-75449_67	MS.gene035408	hypothetical protein L195_g042130 [Trifolium pratense]	873-893	1.5
PC-3p-75449_67	MS.gene035402	hypothetical protein L195_g042130 [Trifolium pratense]	873-893	1.5
PC-3p-75449_67	MS.gene016318	hypothetical protein L195_g042130 [Trifolium pratense]	795-815	1.5
PC-3p-75449_67	MS.gene93004	RecName: Full=Probable cinnamyl alcohol dehydrogenase; Short=CAD	585-605	2.5
PC-3p-75449_67	MS.gene027831	uncharacterized protein LOC101514653 [Cicer arietinum]	1044-1064	1.5
PC-3p-75449_67	MS.gene79003	uncharacterized protein LOC11405999 [Medicago truncatula]	814-834	2.5
PC-3p-75449_67	MS.gene27913	hypothetical protein TSUD_80320 [Trifolium subterraneum]	232-252	2
PC-3p-75449_67	MS.gene27912	protein MET1, chloroplastic [Medicago truncatula]	220-240	2.5
PC-3p-75449_67	MS.gene032808	transmembrane protein, putative [Medicago truncatula]	632-651	2.5
PC-3p-75449_67	MS.gene37032	copper-transporting ATPase HMA4 [Medicago truncatula]	379-398	2.5
PC-3p-75449_67	MS.gene053993	hypothetical protein L195_g042130 [Trifolium pratense]	259-279	1.5
PC-3p-75449_67	MS.gene61940	anaphase-promoting complex subunit 8 isoform X1 [Cicer arietinum]	298-318	2.5
PC-3p-75449_67	MS.gene016799	receptor-like protein [Medicago truncatula]	2913-2933	2.5
PC-3p-75449_67	MS.gene016807	LRR receptor-like kinase, putative [Medicago truncatula]	1788-1808	2.5
PC-3p-75449_67	MS.gene016810	LRR receptor-like kinase, putative [Medicago truncatula]	1686-1706	2.5
PC-3p-75449_67	MS.gene016811	LRR receptor-like kinase, putative [Medicago truncatula]	2034-2054	2.5
PC-3p-75449_67	MS.gene016813	LRR receptor-like kinase, putative [Medicago truncatula]	1683-1703	2.5
PC-3p-75449_67	MS.gene016822	LRR receptor-like kinase, putative [Medicago truncatula]	1530-1550	2.5
PC-3p-75449_67	MS.gene52727	protein DOS2 [Medicago truncatula]	809-828	2.5
PC-3p-75449_67	MS.gene071956	Soyasaponin III rhamnosyltransferase [Mucuna pruriens]	1229-1248	2.5
PC-3p-75449_67	MS.gene013965	uncharacterized protein LOC11422184 [Medicago truncatula]	589-609	2.5
PC-3p-75449_67	MS.gene036149	probable WRKY transcription factor 21 [Medicago truncatula]	274-293	2.5
PC-3p-75449_67	MS.gene57889	probable inactive tRNA-specific adenosine deaminase-like protein 3 [Medicago truncatula]	236-256	2.5
PC-3p-75449_67	MS.gene68249	receptor-like protein 7 [Medicago truncatula]	657-677	2.5
PC-3p-75449_67	MS.gene48642	protein RTF1 homolog [Medicago truncatula]	423-443	2.5
PC-3p-75449_67	MS.gene029589	RecName: Full=Probable cinnamyl alcohol dehydrogenase; Short=CAD	585-605	2.5
PC-3p-75449_67	MS.gene58585	uncharacterized protein LOC11405999 [Medicago truncatula]	814-834	2.5
PC-3p-75449_67	MS.gene020041	copper-transporting ATPase hma5-like protein [Trifolium pratense]	361-380	2.5
PC-3p-75449_67	MS.gene020089	copper-transporting ATPase HMA4 [Medicago truncatula]	379-398	2.5
PC-3p-75449_67	MS.gene37880	receptor-like protein 7 [Medicago truncatula]	507-527	2.5
PC-3p-75449_67	MS.gene38141	probable inactive tRNA-specific adenosine deaminase-like protein 3 [Medicago truncatula]	344-364	2.5
PC-3p-75449_67	MS.gene04683	protein DOS2 [Medicago truncatula]	809-828	2.5
PC-3p-75449_67	MS.gene50528	protein DOS2 [Medicago truncatula]	281-300	2.5
PC-3p-75449_67	MS.gene58830	uncharacterized protein LOC11422184 [Medicago truncatula]	469-489	2.5
PC-3p-75449_67	MS.gene45624	uncharacterized protein DDB_G0290685 [Medicago truncatula]	754-774	2.5
PC-3p-75449_67	MS.gene39903	probable WRKY transcription factor 21 [Medicago truncatula]	817-836	2.5
PC-3p-75449_67	MS.gene064204	MADS-SRF-like domain protein [Medicago truncatula]	1148-1167	2.5
PC-3p-75449_67	MS.gene51969	hypothetical protein L195_g042130 [Trifolium pratense]	90-110	1.5
PC-3p-75449_67	MS.gene90931	uncharacterized protein LOC101514653 [Cicer arietinum]	1044-1064	1.5
PC-3p-75449_67	MS.gene043134	protein RTF1 homolog [Medicago truncatula]	453-473	2
PC-3p-75449_67	MS.gene027504	uncharacterized protein LOC11405999 [Medicago truncatula]	811-831	2.5
PC-3p-75449_67	MS.gene91838	uncharacterized protein LOC101514653 [Cicer arietinum]	984-1004	1.5
PC-3p-75449_67	MS.gene71554	hypothetical protein L195_g042130 [Trifolium pratense]	687-707	1.5
PC-3p-75449_67	MS.gene023674	hypothetical protein L195_g033114 [Trifolium pratense]	235-255	2
PC-3p-75449_67	MS.gene023673	protein MET1, chloroplastic [Medicago truncatula]	220-240	2.5
gma-miR159d_L+1R-1	MS.gene66108	probable LRR receptor-like serine/threonine-protein kinase At5g48740 [Medicago truncatula]	2080-2100	2.5
gma-miR159d_L+1R-1	MS.gene65058	probable LRR receptor-like serine/threonine-protein kinase At5g48740 [Medicago truncatula]	1813-1833	2.5
gma-miR159d_L+1R-1	MS.gene45912	probable LRR receptor-like serine/threonine-protein kinase At5g48740 [Medicago truncatula]	2080-2100	2.5
gma-miR159d_L+1R-1	MS.gene83207	probable LRR receptor-like serine/threonine-protein kinase At5g48740 [Medicago truncatula]	2095-2115	2.5
gma-miR4416c-5p_R+1_1ss2TC	MS.gene07615	spermatogenesis-associated protein 20 [Medicago truncatula]	351-371	2.2
gma-miR4416c-5p_R+1_1ss2TC	MS.gene07617	spermatogenesis-associated protein 20 [Medicago truncatula]	351-371	2.2
gma-miR4416c-5p_R+1_1ss2TC	MS.gene07621	spermatogenesis-associated protein 20 [Medicago truncatula]	351-371	2.2
gma-miR4416c-5p_R+1_1ss2TC	MS.gene07137	spermatogenesis-associated protein 20 [Medicago truncatula]	351-371	2.2
gma-miR4416c-5p_R+1_1ss2TC	MS.gene23001	spermatogenesis-associated protein 20 [Medicago truncatula]	351-371	2.2
gma-miR4416c-5p_R+1_1ss2TC	MS.gene36118	pollen-specific protein C13 [Medicago truncatula]	45-66	2.5
mtr-miR5213-3p_1ss8CT	MS.gene026642	anaphase-promoting complex subunit 11 RING-H2 finger protein [Medicago truncatula]	1332-1351	2.5
PC-5p-163495_24	MS.gene90111	inositol transporter 1 [Medicago truncatula]	369-389	2.5
PC-5p-163495_24	MS.gene45545	NAD-dependent aldehyde dehydrogenase family protein [Medicago truncatula]	330-349	2.5
PC-5p-163495_24	MS.gene050711	ATPase 10, plasma membrane-type isoform X2 [Medicago truncatula]	29-50	2.5
PC-5p-163495_24	MS.gene47640	CDT1-like protein a, chloroplastic [Medicago truncatula]	250-269	2.5
PC-5p-163495_24	MS.gene28101	nitrate regulatory gene2 protein isoform X1 [Medicago truncatula]	1813-1832	2.5
PC-5p-163495_24	MS.gene32202	berberine bridge enzyme-like 10 [Medicago truncatula]	1362-1382	2.5
PC-5p-163495_24	MS.gene052061	NAD-dependent aldehyde dehydrogenase family protein [Medicago truncatula]	330-349	2.5
PC-5p-163495_24	MS.gene33724	berberine bridge enzyme-like 10 [Medicago truncatula]	1362-1382	2.5
PC-5p-163495_24	MS.gene012680	EH domain-containing protein 1 [Medicago truncatula]	973-992	2.5
PC-5p-163495_24	MS.gene012252	U-box domain-containing protein 34 [Medicago truncatula]	508-528	2.5
PC-5p-163495_24	MS.gene037955	hypothetical protein TSUD_276250 [Trifolium subterraneum]	157-176	2.5
PC-5p-163495_24	MS.gene58761	putative nonaspanin (TM9SF) [Medicago truncatula]	1319-1339	2.5
PC-5p-163495_24	MS.gene78391	NAD-dependent aldehyde dehydrogenase family protein [Medicago truncatula]	330-349	2.5
PC-5p-163495_24	MS.gene90889	inositol transporter 1 [Medicago truncatula]	297-317	2.5
PC-5p-163495_24	MS.gene74246	inositol transporter 1 [Medicago truncatula]	369-389	2.5
PC-5p-163495_24	MS.gene68879	EH domain-containing protein 1 [Medicago truncatula]	973-992	2.5
PC-5p-163495_24	MS.gene68957	EH domain-containing protein 1 [Medicago truncatula]	973-992	2.5
PC-5p-163495_24	MS.gene24861	U-box domain-containing protein 34 [Medicago truncatula]	508-528	2.5
PC-5p-163495_24	MS.gene051843	U-box domain-containing protein 34 [Medicago truncatula]	451-471	2.5
PC-5p-163495_24	MS.gene025841	ATPase 10, plasma membrane-type isoform X2 [Medicago truncatula]	29-50	2.5
PC-5p-163495_24	MS.gene025100	WD-40 repeat-containing protein MSI4 [Medicago truncatula]	796-815	2.5
PC-5p-163495_24	MS.gene041418	putative nonaspanin (TM9SF) [Medicago truncatula]	1319-1339	2.5
PC-5p-163495_24	MS.gene02733	berberine bridge enzyme-like 8 [Medicago truncatula]	1239-1259	2.5
PC-5p-163495_24	MS.gene81688	hypothetical protein GLYMA_19G050200 [Glycine max]	1491-1511	2.5
PC-5p-163495_24	MS.gene31099	NAD-dependent aldehyde dehydrogenase family protein [Medicago truncatula]	330-349	2.5
PC-5p-163495_24	MS.gene069226	GDSL esterase/lipase 5 [Medicago truncatula]	1004-1025	2
PC-5p-163495_24	MS.gene90891	inositol transporter 1 [Medicago truncatula]	297-317	2.5
PC-5p-163495_24	MS.gene074460	ABC transporter B family member 19 [Medicago truncatula]	1992-2012	2.5
PC-5p-163495_24	MS.gene61567	CCR4-NOT transcription complex subunit 1 isoform X3 [Medicago truncatula]	5362-5381	2.5
PC-5p-163495_24	MS.gene21962	WD-40 repeat-containing protein MSI4 [Medicago truncatula]	796-815	2.5
PC-5p-163495_24	MS.gene042141	EH domain-containing protein 1 [Medicago truncatula]	973-992	2.5
PC-5p-163495_24	MS.gene024375	ATPase 10, plasma membrane-type isoform X2 [Medicago truncatula]	29-50	2.5
PC-5p-163495_24	MS.gene047996	putative tetrahydroberberine oxidase [Medicago truncatula]	576-596	2.5
PC-5p-163495_24	MS.gene57710	putative nonaspanin (TM9SF) [Medicago truncatula]	1319-1339	2.5
PC-5p-163495_24	MS.gene046164	inositol transporter 1 [Medicago truncatula]	369-389	2.5
PC-5p-163495_24	MS.gene071802	GDSL esterase/lipase 5 [Medicago truncatula]	1004-1025	2
PC-5p-163495_24	MS.gene70363	nitrate regulatory gene2 protein isoform X1 [Medicago truncatula]	1822-1841	2.5
PC-5p-163495_24	MS.gene051068	ABC transporter B family member 19 [Medicago truncatula]	1806-1826	2.5
PC-5p-163495_24	MS.gene071572	ABC transporter B family member 19 [Medicago truncatula]	1785-1805	2.5
PC-5p-163495_24	MS.gene071573	ABC transporter B family member 19 [Medicago truncatula]	1791-1811	2.5
PC-5p-163495_24	MS.gene071574	ABC transporter B family member 19 [Medicago truncatula]	1791-1811	2.5
PC-5p-163495_24	MS.gene051069	ABC transporter B family member 19 [Medicago truncatula]	1806-1826	2.5
PC-5p-163495_24	MS.gene035204	berberine bridge enzyme-like 10 [Medicago truncatula]	1362-1382	2.5
PC-5p-163495_24	MS.gene068683	CCR4-NOT transcription complex protein, putative [Medicago truncatula]	3502-3521	2.5
PC-5p-163495_24	MS.gene22761	ATPase 10, plasma membrane-type isoform X2 [Medicago truncatula]	29-50	2.5
PC-5p-163495_24	MS.gene036639	putative nonaspanin (TM9SF) [Medicago truncatula]	1319-1339	2.5
PC-5p-163495_24	MS.gene76460	putative RNA-directed DNA polymerase [Medicago truncatula]	1368-1388	2.5
PC-5p-163495_24	MS.gene25081	ABC transporter B family member 19 [Medicago truncatula]	1992-2012	2.5
PC-5p-163495_24	MS.gene030777	nitrate regulatory gene2 protein isoform X1 [Medicago truncatula]	1822-1841	2.5
PC-5p-163495_24	MS.gene57428	nitrate regulatory gene2 protein isoform X1 [Medicago truncatula]	1822-1841	2.5
PC-5p-163495_24	MS.gene030778	nitrate regulatory gene2 protein isoform X1 [Medicago truncatula]	1822-1841	2.5
PC-5p-163495_24	MS.gene030780	nitrate regulatory gene2 protein isoform X1 [Medicago truncatula]	1822-1841	2.5
PC-5p-163495_24	MS.gene022534	CCR4-NOT transcription complex protein, putative [Medicago truncatula]	5337-5356	2.5
PC-5p-163495_24	MS.gene62786	CCR4-NOT transcription complex protein, putative [Medicago truncatula]	5310-5329	2.5
PC-5p-163495_24	MS.gene052554	berberine bridge enzyme-like 10 [Medicago truncatula]	1122-1142	2.5
mtr-miR2111a-5p	MS.gene004274	O-fucosyltransferase 8 isoform X1 [Medicago truncatula]	355-375	2.5
mtr-miR2111a-5p	MS.gene06410	mitogen-activated protein kinase kinase kinase 3 [Medicago truncatula]	1623-1643	1.8
mtr-miR2111a-5p	MS.gene95590	hypothetical protein TSUD_302420 [Trifolium subterraneum]	522-542	1.8
mtr-miR2111a-5p	MS.gene017994	metal tolerance protein C2 [Medicago truncatula]	1136-1156	2.5
mtr-miR2111a-5p	MS.gene002598	GDP-fucose protein O-fucosyltransferase [Medicago truncatula]	351-371	2.5
mtr-miR2111a-5p	MS.gene57699	F-box/kelch-repeat protein At3g27150 [Medicago truncatula]	63-83	1
mtr-miR2111a-5p	MS.gene57757	F-box/kelch-repeat protein At3g27150 [Medicago truncatula]	88-108	1
mtr-miR2111a-5p	MS.gene040409	F-box/kelch-repeat protein At3g27150 [Medicago truncatula]	63-83	1
mtr-miR2111a-5p	MS.gene040410	F-box/kelch-repeat protein At3g27150 [Medicago truncatula]	63-83	1
mtr-miR2111a-5p	MS.gene57673	F-box/kelch-repeat protein At3g27150 [Medicago truncatula]	63-83	1
mtr-miR2111a-5p	MS.gene57674	F-box/kelch-repeat protein At3g27150 [Medicago truncatula]	63-83	1
mtr-miR2111a-5p	MS.gene049287	mitogen-activated protein kinase kinase kinase 3 [Medicago truncatula]	1623-1643	1.8
mtr-miR2111a-5p	MS.gene036861	putative pentatricopeptide repeat-containing protein At5g09950 [Medicago truncatula]	446-466	2
mtr-miR2111a-5p	MS.gene036877	pentatricopeptide (PPR) repeat protein, partial [Medicago truncatula]	116-136	2.2
mtr-miR2111a-5p	MS.gene01579	GDP-fucose protein O-fucosyltransferase [Medicago truncatula]	351-371	2.5
mtr-miR2111a-5p	MS.gene060549	putative pentatricopeptide repeat-containing protein At5g09950 [Medicago truncatula]	446-466	2
mtr-miR2111a-5p	MS.gene013314	mitogen-activated protein kinase kinase kinase 3 [Medicago truncatula]	1710-1730	1.8
mtr-miR2111a-5p	MS.gene055989	metal tolerance protein C2 [Medicago truncatula]	1136-1156	2.5
mtr-miR2111a-5p	MS.gene52666	metal tolerance protein C2 [Medicago truncatula]	1142-1162	2.5
mtr-miR2111a-5p	MS.gene79178	F-box/kelch-repeat protein At3g27150 [Medicago truncatula]	63-83	1
mtr-miR2111a-5p	MS.gene054952	mitogen-activated protein kinase kinase kinase 3 [Medicago truncatula]	1623-1643	1.8
mtr-miR2111a-5p	MS.gene59735	putative pentatricopeptide repeat-containing protein At5g09950 [Medicago truncatula]	446-466	2
mtr-miR2111a-5p	MS.gene47014	pentatricopeptide (PPR) repeat protein, partial [Medicago truncatula]	116-136	2
mtr-miR2111a-5p	MS.gene038702	putative pentatricopeptide repeat-containing protein At5g09950 [Medicago truncatula]	446-466	2
mtr-miR2111a-5p	MS.gene04630	metal tolerance protein C2 [Medicago truncatula]	1142-1162	2.5
gma-miR171c-3p	MS.gene63719	zingipain-2 [Medicago truncatula]	189-208	2
gma-miR171c-3p	MS.gene48898	scarecrow-like protein 6 [Medicago truncatula]	864-884	1.5
gma-miR171c-3p	MS.gene010745	putative transcription factor GRAS family [Medicago truncatula]	1182-1202	1.5
gma-miR171c-3p	MS.gene010744	putative transcription factor GRAS family [Medicago truncatula]	1179-1199	1.5
gma-miR171c-3p	MS.gene026876	zingipain-2 [Medicago truncatula]	210-229	2
gma-miR171c-3p	MS.gene69867	protein PHOX1 [Medicago truncatula]	104-123	2.5
gma-miR171c-3p	MS.gene78492	protein PHOX1 [Medicago truncatula]	104-123	2.5
gma-miR171c-3p	MS.gene059248	scarecrow-like protein 6 [Medicago truncatula]	861-881	1.5
gma-miR171c-3p	MS.gene060218	zingipain-2 [Medicago truncatula]	312-331	2
gma-miR171c-3p	MS.gene033802	protein PHOX1 [Medicago truncatula]	104-123	2.5
gma-miR171c-3p	MS.gene026873	zingipain-2 [Medicago truncatula]	141-160	2
gma-miR171c-3p	MS.gene026874	zingipain-2 [Medicago truncatula]	210-229	2
gma-miR171c-3p	MS.gene63396	zingipain-2 [Medicago truncatula]	210-229	2
gma-miR171c-3p	MS.gene96423	putative transcription factor GRAS family [Medicago truncatula]	1182-1202	1.5
gma-miR171c-3p	MS.gene96424	putative transcription factor GRAS family [Medicago truncatula]	1182-1202	1.5
gma-miR171c-3p	MS.gene76644	scarecrow-like protein 6 [Medicago truncatula]	864-884	1.5
gma-miR171c-3p	MS.gene20122	GRAS family transcription regulator [Medicago truncatula]	123-143	1.5
gma-miR171c-3p	MS.gene82161	scarecrow-like protein 6 [Medicago truncatula]	864-884	1.5
gma-miR171c-3p	MS.gene82054	putative transcription factor GRAS family [Medicago truncatula]	1185-1205	1.5
gma-miR171c-3p	MS.gene82053	putative transcription factor GRAS family [Medicago truncatula]	1188-1208	1.5
mtr-miR166d_1ss17CT	MS.gene069869	homeobox-leucine zipper protein ATHB-15 [Medicago truncatula]	542-562	1.8
mtr-miR166d_1ss17CT	MS.gene028713	putative transcription factor & lipid binding HD-SAD family [Medicago truncatula]	560-580	2.2
mtr-miR166d_1ss17CT	MS.gene007668	homeobox-leucine zipper protein REVOLUTA [Medicago truncatula]	569-589	2.2
mtr-miR166d_1ss17CT	MS.gene40724	homeobox-leucine zipper protein ATHB-8 [Medicago truncatula]	545-565	2.2
mtr-miR166d_1ss17CT	MS.gene03075	homeobox-leucine zipper protein ATHB-14 isoform X2 [Medicago truncatula]	551-571	2.2
mtr-miR166d_1ss17CT	MS.gene36352	homeobox-leucine zipper protein ATHB-15 [Medicago truncatula]	542-562	1.8
[truncated: 817 more rows]
