# Supplementary material for: Integrated agronomic, physiological, microstructure, and whole-transcriptome analyses reveal the role of biomass accumulation and quality formation during Se biofortification in alfalfa
Source: Front Plant Sci. 2023 Jul 20;14:1198847. doi: 10.3389/fpls.2023.1198847 (PMC10400095; doi:10.3389/fpls.2023.1198847)
Supplement: Supplementary Table S7 — GO terms of targets of DEmiRNAs in alfalfa under Se biofortification. [file Table_7.xlsx]

## Sheet: GO_significant
GO Id	Function	GO_term	S gene number	TS gene number	B gene number	TB gene number	Pvalue of Fisher's Exact Test
GO:0006952	biological_process	defense response	226	2031	4703	126412	0
GO:0043531	molecular_function	ADP binding	171	2031	1780	126412	0
GO:0048316	biological_process	seed development	34	2031	295	126412	0
GO:0003678	molecular_function	DNA helicase activity	47	2031	569	126412	0
GO:0043682	molecular_function	copper-transporting ATPase activity	15	2031	38	126412	0
GO:0009855	biological_process	determination of bilateral symmetry	19	2031	26	126412	4.4483e-29
GO:0007165	biological_process	signal transduction	143	2031	2323	126412	1.11022e-16
GO:0010014	biological_process	meristem initiation	23	2031	53	126412	2.22045e-16
GO:0008289	molecular_function	lipid binding	43	2031	595	126412	2.22045e-16
GO:0000723	biological_process	telomere maintenance	50	2031	546	126412	5.55112e-16
GO:0048461	biological_process	flower structural organization	9	2031	10	126412	6.90894e-16
GO:0010073	biological_process	meristem maintenance	23	2031	140	126412	1.11022e-15
GO:0080187	biological_process	floral organ senescence	9	2031	14	126412	1.30525e-13
GO:0080060	biological_process	integument development	12	2031	37	126412	3.66374e-13
GO:0000326	cellular_component	protein storage vacuole	17	2031	105	126412	1.28275e-12
GO:0048263	biological_process	determination of dorsal identity	8	2031	12	126412	2.04737e-12
GO:0006281	biological_process	DNA repair	56	2031	1243	126412	1.29243e-11
GO:0032389	cellular_component	MutLalpha complex	7	2031	10	126412	3.14652e-11
GO:0048587	biological_process	regulation of short-day photoperiodism, flowering	12	2031	53	126412	4.16158e-11
GO:0010093	biological_process	specification of floral organ identity	12	2031	56	126412	8.33205e-11
GO:0005712	cellular_component	chiasma	7	2031	11	126412	8.53177e-11
GO:0034066	cellular_component	RIC1-RGP1 guanyl-nucleotide exchange factor complex	6	2031	7	126412	1.17887e-10
GO:0080169	biological_process	cellular response to boron-containing substance deprivation	8	2031	18	126412	1.66094e-10
GO:0019897	cellular_component	extrinsic component of plasma membrane	19	2031	183	126412	1.88526e-10
GO:0003886	molecular_function	DNA (cytosine-5-)-methyltransferase activity	12	2031	60	126412	1.96808e-10
GO:0032508	biological_process	DNA duplex unwinding	47	2031	1014	126412	2.21904e-10
GO:0048579	biological_process	negative regulation of long-day photoperiodism, flowering	14	2031	94	126412	3.84514e-10
GO:0016514	cellular_component	SWI/SNF complex	9	2031	29	126412	5.25503e-10
GO:0004197	molecular_function	cysteine-type endopeptidase activity	27	2031	408	126412	1.0291e-09
GO:0035448	cellular_component	extrinsic component of thylakoid membrane	5	2031	5	126412	1.06538e-09
GO:0034498	biological_process	early endosome to Golgi transport	6	2031	9	126412	1.37607e-09
GO:1990071	cellular_component	TRAPPII protein complex	6	2031	9	126412	1.37607e-09
GO:0010087	biological_process	phloem or xylem histogenesis	21	2031	254	126412	1.44947e-09
GO:0048194	biological_process	Golgi vesicle budding	10	2031	44	126412	1.69289e-09
GO:0016569	biological_process	covalent chromatin modification	23	2031	315	126412	2.72158e-09
GO:0031957	molecular_function	very long-chain fatty acid-CoA ligase activity	7	2031	17	126412	4.62048e-09
GO:0010227	biological_process	floral organ abscission	13	2031	95	126412	4.71005e-09
GO:0015706	biological_process	nitrate transport	16	2031	160	126412	8.62742e-09
GO:0030154	biological_process	cell differentiation	49	2031	1227	126412	1.16323e-08
GO:0006471	biological_process	protein ADP-ribosylation	7	2031	19	126412	1.16389e-08
GO:0006376	biological_process	mRNA splice site selection	8	2031	29	126412	1.39221e-08
GO:0043231	cellular_component	intracellular membrane-bounded organelle	67	2031	2000	126412	2.83942e-08
GO:0042626	molecular_function	ATPase-coupled transmembrane transporter activity	43	2031	1035	126412	2.9833e-08
GO:0005764	cellular_component	lysosome	21	2031	307	126412	4.03208e-08
GO:0048768	biological_process	root hair cell tip growth	11	2031	79	126412	5.95993e-08
GO:0030912	biological_process	response to deep water	4	2031	4	126412	6.6439e-08
GO:0034213	biological_process	quinolinate catabolic process	4	2031	4	126412	6.6439e-08
GO:0030198	biological_process	extracellular matrix organization	4	2031	4	126412	6.6439e-08
GO:0030436	biological_process	asexual sporulation	4	2031	4	126412	6.6439e-08
GO:0071424	molecular_function	rRNA (cytosine-N4-)-methyltransferase activity	4	2031	4	126412	6.6439e-08
GO:0042391	biological_process	regulation of membrane potential	16	2031	188	126412	8.42955e-08
GO:0006306	biological_process	DNA methylation	17	2031	215	126412	9.82286e-08
GO:0050982	biological_process	detection of mechanical stimulus	8	2031	37	126412	1.11724e-07
GO:0004012	molecular_function	ATPase-coupled phospholipid transporter activity	10	2031	67	126412	1.21047e-07
GO:0032436	biological_process	positive regulation of proteasomal ubiquitin-dependent protein catabolic process	16	2031	197	126412	1.60545e-07
GO:0031624	molecular_function	ubiquitin conjugating enzyme binding	16	2031	198	126412	1.72064e-07
GO:0009944	biological_process	polarity specification of adaxial/abaxial axis	11	2031	89	126412	2.08038e-07
GO:0009956	biological_process	radial pattern formation	7	2031	28	126412	2.40991e-07
GO:0010492	biological_process	maintenance of shoot apical meristem identity	11	2031	91	126412	2.61817e-07
GO:0018023	biological_process	peptidyl-lysine trimethylation	4	2031	5	126412	3.27934e-07
GO:0070413	biological_process	trehalose metabolism in response to stress	8	2031	45	126412	5.5659e-07
GO:0003825	molecular_function	alpha,alpha-trehalose-phosphate synthase (UDP-forming) activity	8	2031	45	126412	5.5659e-07
GO:0019953	biological_process	sexual reproduction	12	2031	123	126412	7.98805e-07
GO:0048481	biological_process	plant ovule development	12	2031	126	126412	1.03464e-06
GO:0046910	molecular_function	pectinesterase inhibitor activity	22	2031	409	126412	1.19533e-06
GO:0009965	biological_process	leaf morphogenesis	17	2031	258	126412	1.27716e-06
GO:0009294	biological_process	DNA mediated transformation	16	2031	236	126412	1.79242e-06
GO:0045597	biological_process	positive regulation of cell differentiation	5	2031	14	126412	1.89013e-06
GO:0032044	cellular_component	DSIF complex	5	2031	14	126412	1.89013e-06
GO:0006857	biological_process	oligopeptide transport	23	2031	457	126412	2.12656e-06
GO:2000028	biological_process	regulation of photoperiodism, flowering	11	2031	114	126412	2.54366e-06
GO:0010051	biological_process	xylem and phloem pattern formation	13	2031	166	126412	3.40171e-06
GO:0004788	molecular_function	thiamine diphosphokinase activity	3	2031	3	126412	4.14127e-06
GO:0071944	cellular_component	cell periphery	22	2031	442	126412	4.1782e-06
GO:2001022	biological_process	positive regulation of response to DNA damage stimulus	4	2031	8	126412	4.41683e-06
GO:0001164	molecular_function	RNA polymerase I CORE element sequence-specific DNA binding	4	2031	8	126412	4.41683e-06
GO:0005668	cellular_component	RNA polymerase transcription factor SL1 complex	4	2031	8	126412	4.41683e-06
GO:0019243	biological_process	methylglyoxal catabolic process to D-lactate via S-lactoyl-glutathione	8	2031	60	126412	5.33831e-06
GO:0005576	cellular_component	extracellular region	153	2031	6653	126412	7.61754e-06
GO:0009575	cellular_component	chromoplast stroma	5	2031	19	126412	1.02673e-05
GO:0004805	molecular_function	trehalose-phosphatase activity	8	2031	67	126412	1.23223e-05
GO:0009955	biological_process	adaxial/abaxial pattern specification	4	2031	10	126412	1.29135e-05
GO:0008274	cellular_component	gamma-tubulin ring complex	5	2031	20	126412	1.35079e-05
GO:0005615	cellular_component	extracellular space	29	2031	739	126412	1.43019e-05
GO:0035514	molecular_function	DNA demethylase activity	3	2031	4	126412	1.63658e-05
GO:0103053	molecular_function	1-ethyladenine demethylase activity	3	2031	4	126412	1.63658e-05
GO:0102391	molecular_function	decanoate-CoA ligase activity	7	2031	51	126412	1.70744e-05
GO:0008381	molecular_function	mechanosensitive ion channel activity	8	2031	70	126412	1.70929e-05
GO:0051016	biological_process	barbed-end actin filament capping	5	2031	21	126412	1.74937e-05
GO:0017112	molecular_function	Rab guanyl-nucleotide exchange factor activity	6	2031	35	126412	1.85912e-05
GO:0000305	biological_process	response to oxygen radical	4	2031	11	126412	2.00332e-05
GO:0019172	molecular_function	glyoxalase III activity	4	2031	11	126412	2.00332e-05
GO:0004362	molecular_function	glutathione-disulfide reductase activity	4	2031	11	126412	2.00332e-05
GO:0005887	cellular_component	integral component of plasma membrane	51	2031	1705	126412	2.59729e-05
GO:0009626	biological_process	plant-type hypersensitive response	25	2031	609	126412	2.61074e-05
GO:0022857	molecular_function	transmembrane transporter activity	29	2031	764	126412	2.61297e-05
GO:0000209	biological_process	protein polyubiquitination	21	2031	462	126412	2.62789e-05
GO:0004467	molecular_function	long-chain fatty acid-CoA ligase activity	7	2031	55	126412	2.83023e-05
GO:0005249	molecular_function	voltage-gated potassium channel activity	13	2031	203	126412	2.95228e-05
GO:0048833	biological_process	specification of floral organ number	4	2031	12	126412	2.96657e-05
GO:0090549	biological_process	response to carbon starvation	4	2031	12	126412	2.96657e-05
GO:0070860	cellular_component	RNA polymerase I core factor complex	4	2031	12	126412	2.96657e-05
GO:0006419	biological_process	alanyl-tRNA aminoacylation	5	2031	24	126412	3.51048e-05
GO:0004813	molecular_function	alanine-tRNA ligase activity	5	2031	24	126412	3.51048e-05
GO:0000795	cellular_component	synaptonemal complex	7	2031	57	126412	3.58593e-05
GO:0030599	molecular_function	pectinesterase activity	22	2031	510	126412	3.74689e-05
GO:0051292	biological_process	nuclear pore complex assembly	3	2031	5	126412	4.04225e-05
GO:0016423	molecular_function	tRNA (guanine) methyltransferase activity	4	2031	13	126412	4.23032e-05
GO:0010075	biological_process	regulation of meristem growth	8	2031	82	126412	5.44587e-05
GO:0030261	biological_process	chromosome condensation	4	2031	14	126412	5.84684e-05
GO:1901181	biological_process	negative regulation of cellular response to caffeine	4	2031	14	126412	5.84684e-05
GO:0019788	molecular_function	NEDD8 transferase activity	4	2031	14	126412	5.84684e-05
GO:0005089	molecular_function	Rho guanyl-nucleotide exchange factor activity	7	2031	62	126412	6.22135e-05
GO:0005813	cellular_component	centrosome	9	2031	108	126412	6.59496e-05
GO:0030036	biological_process	actin cytoskeleton organization	8	2031	85	126412	7.04819e-05
GO:0000151	cellular_component	ubiquitin ligase complex	20	2031	459	126412	7.20829e-05
GO:0009523	cellular_component	photosystem II	8	2031	86	126412	7.66215e-05
GO:0004514	molecular_function	nicotinate-nucleotide diphosphorylase (carboxylating) activity	4	2031	15	126412	7.87124e-05
GO:0032116	cellular_component	SMC loading complex	4	2031	15	126412	7.87124e-05
GO:0080056	biological_process	petal vascular tissue pattern formation	3	2031	6	126412	7.98738e-05
GO:0080057	biological_process	sepal vascular tissue pattern formation	3	2031	6	126412	7.98738e-05
GO:1905392	biological_process	plant organ morphogenesis	9	2031	113	126412	9.37292e-05
GO:0005992	biological_process	trehalose biosynthetic process	8	2031	89	126412	9.77588e-05
GO:1903409	biological_process	reactive oxygen species biosynthetic process	4	2031	16	126412	0.000103612
GO:0045739	biological_process	positive regulation of DNA repair	4	2031	16	126412	0.000103612
GO:0001530	molecular_function	lipopolysaccharide binding	4	2031	16	126412	0.000103612
GO:0035529	molecular_function	NADH pyrophosphatase activity	5	2031	30	126412	0.00010865
GO:0016971	molecular_function	flavin-linked sulfhydryl oxidase activity	4	2031	17	126412	0.000133765
GO:0008113	molecular_function	peptide-methionine (S)-S-oxide reductase activity	4	2031	17	126412	0.000133765
GO:0006298	biological_process	mismatch repair	7	2031	70	126412	0.000135673
GO:1902265	biological_process	abscisic acid homeostasis	3	2031	7	126412	0.000138101
GO:0005261	molecular_function	cation channel activity	3	2031	7	126412	0.000138101
GO:0015112	molecular_function	nitrate transmembrane transporter activity	8	2031	95	126412	0.000154604
GO:0007093	biological_process	mitotic cell cycle checkpoint	4	2031	18	126412	0.000169793
GO:0004839	molecular_function	ubiquitin activating enzyme activity	4	2031	18	126412	0.000169793
GO:0004416	molecular_function	hydroxyacylglutathione hydrolase activity	4	2031	18	126412	0.000169793
GO:0042938	biological_process	dipeptide transport	8	2031	97	126412	0.000178713
GO:0042406	cellular_component	extrinsic component of endoplasmic reticulum membrane	6	2031	53	126412	0.000205589
GO:0002213	biological_process	defense response to insect	8	2031	99	126412	0.000205829
GO:0018024	molecular_function	histone-lysine N-methyltransferase activity	12	2031	214	126412	0.000206386
GO:0010450	biological_process	inflorescence meristem growth	4	2031	19	126412	0.000212333
GO:0006434	biological_process	seryl-tRNA aminoacylation	4	2031	19	126412	0.000212333
GO:0034088	biological_process	maintenance of mitotic sister chromatid cohesion	4	2031	19	126412	0.000212333
GO:0004828	molecular_function	serine-tRNA ligase activity	4	2031	19	126412	0.000212333
GO:0000124	cellular_component	SAGA complex	4	2031	19	126412	0.000212333
GO:0004521	molecular_function	endoribonuclease activity	10	2031	155	126412	0.000224458
GO:0051415	biological_process	microtubule nucleation by interphase microtubule organizing center	5	2031	35	126412	0.00023158
GO:0000923	cellular_component	equatorial microtubule organizing center	5	2031	35	126412	0.00023158
GO:0006355	biological_process	regulation of transcription, DNA-templated	191	2031	9247	126412	0.000254195
GO:0005524	molecular_function	ATP binding	182	2031	8750	126412	0.000254869
GO:0016099	biological_process	monoterpenoid biosynthetic process	2	2031	2	126412	0.000258008
GO:0016628	molecular_function	oxidoreductase activity, acting on the CH-CH group of donors, NAD or NADP as acceptor	2	2031	2	126412	0.000258008
GO:0071042	biological_process	nuclear polyadenylation-dependent mRNA catabolic process	4	2031	20	126412	0.00026204
GO:0034473	biological_process	U1 snRNA 3'-end processing	4	2031	20	126412	0.00026204
GO:0034476	biological_process	U5 snRNA 3'-end processing	4	2031	20	126412	0.00026204
GO:0003860	molecular_function	3-hydroxyisobutyryl-CoA hydrolase activity	4	2031	20	126412	0.00026204
GO:0035145	cellular_component	exon-exon junction complex	4	2031	20	126412	0.00026204
GO:0090307	biological_process	mitotic spindle assembly	5	2031	36	126412	0.000265382
GO:0010072	biological_process	primary shoot apical meristem specification	8	2031	104	126412	0.000288641
GO:0005980	biological_process	glycogen catabolic process	4	2031	21	126412	0.00031958
GO:0008184	molecular_function	glycogen phosphorylase activity	4	2031	21	126412	0.00031958
GO:0006351	biological_process	transcription, DNA-templated	164	2031	7815	126412	0.000347547
GO:0072686	cellular_component	mitotic spindle	7	2031	82	126412	0.000364266
GO:0004838	molecular_function	L-tyrosine:2-oxoglutarate aminotransferase activity	4	2031	22	126412	0.000385634
GO:0017091	molecular_function	AU-rich element binding	4	2031	22	126412	0.000385634
GO:0009117	biological_process	nucleotide metabolic process	5	2031	39	126412	0.000389479
GO:0006368	biological_process	transcription elongation from RNA polymerase II promoter	9	2031	138	126412	0.000421566
GO:0010220	biological_process	positive regulation of vernalization response	3	2031	10	126412	0.000456671
GO:0000478	biological_process	endonucleolytic cleavage involved in rRNA processing	3	2031	10	126412	0.000456671
GO:0070182	molecular_function	DNA polymerase binding	3	2031	10	126412	0.000456671
GO:0080165	biological_process	callose deposition in phloem sieve plate	4	2031	23	126412	0.00046089
GO:0016556	biological_process	mRNA modification	6	2031	62	126412	0.000487044
GO:0030042	biological_process	actin filament depolymerization	5	2031	41	126412	0.000493673
GO:0005685	cellular_component	U1 snRNP	8	2031	114	126412	0.00053591
GO:0051571	biological_process	positive regulation of histone H3-K4 methylation	4	2031	24	126412	0.000546048
GO:0046907	biological_process	intracellular transport	4	2031	24	126412	0.000546048
GO:0006536	biological_process	glutamate metabolic process	4	2031	24	126412	0.000546048
GO:0004351	molecular_function	glutamate decarboxylase activity	4	2031	24	126412	0.000546048
GO:0051365	biological_process	cellular response to potassium ion starvation	5	2031	42	126412	0.000553009
GO:0043015	molecular_function	gamma-tubulin binding	6	2031	64	126412	0.000578076
GO:0045053	biological_process	protein retention in Golgi apparatus	4	2031	25	126412	0.000641809
GO:0051298	biological_process	centrosome duplication	5	2031	45	126412	0.00076332
GO:0008398	molecular_function	sterol 14-demethylase activity	2	2031	3	126412	0.000765741
GO:0003777	molecular_function	microtubule motor activity	14	2031	320	126412	0.000791728
GO:0071004	cellular_component	U2-type prespliceosome	8	2031	121	126412	0.000794278
GO:0038023	molecular_function	signaling receptor activity	4	2031	27	126412	0.000867984
GO:0005816	cellular_component	spindle pole body	5	2031	47	126412	0.000933343
GO:0006617	biological_process	SRP-dependent cotranslational protein targeting to membrane, signal sequence recognition	4	2031	28	126412	0.000999822
GO:0007264	biological_process	small GTPase mediated signal transduction	7	2031	97	126412	0.00100032
GO:0033201	molecular_function	alpha-1,4-glucan synthase activity	3	2031	13	126412	0.00104983
GO:1901970	biological_process	positive regulation of mitotic sister chromatid separation	4	2031	29	126412	0.00114511
GO:0006101	biological_process	citrate metabolic process	4	2031	30	126412	0.00130457
GO:0003994	molecular_function	aconitate hydratase activity	4	2031	30	126412	0.00130457
GO:0048438	biological_process	floral whorl development	3	2031	14	126412	0.0013202
GO:0010929	biological_process	positive regulation of auxin mediated signaling pathway	3	2031	14	126412	0.0013202
GO:0042823	biological_process	pyridoxal phosphate biosynthetic process	3	2031	14	126412	0.0013202
GO:0015864	biological_process	pyrimidine nucleoside transport	4	2031	31	126412	0.0014789
GO:0000793	cellular_component	condensed chromosome	4	2031	31	126412	0.0014789
GO:0035149	biological_process	lumen formation, open tracheal system	2	2031	4	126412	0.00151512
GO:0043291	cellular_component	RAVE complex	2	2031	4	126412	0.00151512
GO:0016762	molecular_function	xyloglucan:xyloglucosyl transferase activity	9	2031	166	126412	0.00156551
GO:0010206	biological_process	photosystem II repair	5	2031	53	126412	0.00161311
GO:0010588	biological_process	cotyledon vascular tissue pattern formation	5	2031	53	126412	0.00161311
GO:0016157	molecular_function	sucrose synthase activity	5	2031	53	126412	0.00161311
GO:0010021	biological_process	amylopectin biosynthetic process	3	2031	15	126412	0.00163058
GO:0043928	biological_process	exonucleolytic catabolism of deadenylated mRNA	4	2031	32	126412	0.00166881
GO:0015858	biological_process	nucleoside transport	4	2031	32	126412	0.00166881
GO:0004028	molecular_function	3-chloroallyl aldehyde dehydrogenase activity	4	2031	32	126412	0.00166881
GO:0005884	cellular_component	actin filament	5	2031	54	126412	0.00175443
GO:0010143	biological_process	cutin biosynthetic process	7	2031	108	126412	0.00186591
GO:0009880	biological_process	embryonic pattern specification	4	2031	33	126412	0.00187501
GO:0046740	biological_process	transport of virus in host, cell to cell	4	2031	33	126412	0.00187501
GO:0051307	biological_process	meiotic chromosome separation	4	2031	33	126412	0.00187501
GO:0071038	biological_process	nuclear polyadenylation-dependent tRNA catabolic process	4	2031	33	126412	0.00187501
GO:0035865	biological_process	cellular response to potassium ion	5	2031	55	126412	0.00190461
GO:0032012	biological_process	regulation of ARF protein signal transduction	3	2031	16	126412	0.00198295
GO:0030418	biological_process	nicotianamine biosynthetic process	3	2031	16	126412	0.00198295
GO:0030410	molecular_function	nicotianamine synthase activity	3	2031	16	126412	0.00198295
GO:0000467	biological_process	exonucleolytic trimming to generate mature 3'-end of 5.8S rRNA from tricistronic rRNA transcript (SSU-rRNA, 5.8S rRNA, LSU-rRNA)	4	2031	34	126412	0.00209819
GO:0010200	biological_process	response to chitin	19	2031	560	126412	0.00216126
GO:0048448	biological_process	stamen morphogenesis	4	2031	35	126412	0.00233905
GO:1990269	molecular_function	RNA polymerase II C-terminal domain phosphoserine binding	4	2031	35	126412	0.00233905
GO:0004791	molecular_function	thioredoxin-disulfide reductase activity	4	2031	35	126412	0.00233905
GO:0044210	biological_process	'de novo' CTP biosynthetic process	3	2031	17	126412	0.00237921
GO:0071260	biological_process	cellular response to mechanical stimulus	3	2031	17	126412	0.00237921
GO:0000076	biological_process	DNA replication checkpoint	3	2031	17	126412	0.00237921
GO:0016597	molecular_function	amino acid binding	5	2031	58	126412	0.00241154
GO:0008593	biological_process	regulation of Notch signaling pathway	2	2031	5	126412	0.00249824
GO:0071028	biological_process	nuclear mRNA surveillance	4	2031	36	126412	0.00259826
GO:0010189	biological_process	vitamin E biosynthetic process	4	2031	36	126412	0.00259826
GO:0006572	biological_process	tyrosine catabolic process	4	2031	36	126412	0.00259826
GO:0008312	molecular_function	7S RNA binding	4	2031	37	126412	0.00287649
GO:0043565	molecular_function	sequence-specific DNA binding	76	2031	3410	126412	0.00316422
GO:0016593	cellular_component	Cdc73/Paf1 complex	4	2031	38	126412	0.00317442
GO:0032586	cellular_component	protein storage vacuole membrane	4	2031	38	126412	0.00317442
GO:0004857	molecular_function	enzyme inhibitor activity	8	2031	151	126412	0.0032243
GO:0010207	biological_process	photosystem II assembly	5	2031	62	126412	0.00323122
GO:0007018	biological_process	microtubule-based movement	14	2031	373	126412	0.00325678
GO:0005871	cellular_component	kinesin complex	14	2031	373	126412	0.00325678
GO:0030140	cellular_component	trans-Golgi network transport vesicle	3	2031	19	126412	0.00331023
GO:0033169	biological_process	histone H3-K9 demethylation	4	2031	39	126412	0.0034927
GO:0080156	biological_process	mitochondrial mRNA modification	8	2031	154	126412	0.0036333
GO:0031625	molecular_function	ubiquitin protein ligase binding	28	2031	996	126412	0.00368478
GO:0051011	molecular_function	microtubule minus-end binding	5	2031	64	126412	0.00370856
GO:0032456	biological_process	endocytic recycling	4	2031	40	126412	0.00383198
GO:0000963	biological_process	mitochondrial RNA processing	3	2031	20	126412	0.00384815
GO:0008725	molecular_function	DNA-3-methyladenine glycosylase activity	3	2031	20	126412	0.00384815
GO:0004571	molecular_function	mannosyl-oligosaccharide 1,2-alpha-mannosidase activity	3	2031	20	126412	0.00384815
GO:0004373	molecular_function	glycogen (starch) synthase activity	3	2031	20	126412	0.00384815
GO:0000049	molecular_function	tRNA binding	5	2031	65	126412	0.00396525
GO:0005388	molecular_function	ATPase-coupled calcium transmembrane transporter activity	6	2031	93	126412	0.00397163
GO:0019941	biological_process	modification-dependent protein catabolic process	4	2031	41	126412	0.00419287
GO:0009435	biological_process	NAD biosynthetic process	4	2031	42	126412	0.00457602
GO:0019760	biological_process	glucosinolate metabolic process	9	2031	195	126412	0.00458399
GO:0018026	biological_process	peptidyl-lysine monomethylation	4	2031	43	126412	0.00498201
GO:0009701	biological_process	isoflavonoid phytoalexin biosynthetic process	4	2031	43	126412	0.00498201
GO:0030746	molecular_function	isoflavone 4'-O-methyltransferase activity	4	2031	43	126412	0.00498201
GO:0010345	biological_process	suberin biosynthetic process	7	2031	129	126412	0.00501504
GO:0000166	molecular_function	nucleotide binding	29	2031	1068	126412	0.00507872
GO:0051603	biological_process	proteolysis involved in cellular protein catabolic process	21	2031	698	126412	0.00524511
GO:0031022	biological_process	nuclear migration along microfilament	3	2031	23	126412	0.00576805
GO:0009011	molecular_function	starch synthase activity	3	2031	23	126412	0.00576805
GO:0044212	molecular_function	transcription regulatory region DNA binding	38	2031	1520	126412	0.00583391
GO:0019898	cellular_component	extrinsic component of membrane	9	2031	205	126412	0.00630807
GO:0016279	molecular_function	protein-lysine N-methyltransferase activity	4	2031	46	126412	0.00634301
GO:0015979	biological_process	photosynthesis	12	2031	323	126412	0.00665608
GO:0071588	biological_process	hydrogen peroxide mediated signaling pathway	2	2031	8	126412	0.00677411
GO:0070577	molecular_function	lysine-acetylated histone binding	2	2031	8	126412	0.00677411
GO:0016570	biological_process	histone modification	4	2031	47	126412	0.00684624
GO:0032465	biological_process	regulation of cytokinesis	4	2031	47	126412	0.00684624
GO:0045010	biological_process	actin nucleation	5	2031	74	126412	0.00687395
GO:0003779	molecular_function	actin binding	10	2031	246	126412	0.00696294
GO:0016036	biological_process	cellular response to phosphate starvation	8	2031	173	126412	0.0072294
GO:0015629	cellular_component	actin cytoskeleton	5	2031	75	126412	0.00726941
GO:0003883	molecular_function	CTP synthase activity	3	2031	25	126412	0.00731481
GO:0006614	biological_process	SRP-dependent cotranslational protein targeting to membrane	4	2031	48	126412	0.00737515
GO:0032454	molecular_function	histone demethylase activity (H3-K9 specific)	4	2031	48	126412	0.00737515
GO:0034620	biological_process	cellular response to unfolded protein	6	2031	107	126412	0.00780484
GO:0008202	biological_process	steroid metabolic process	6	2031	107	126412	0.00780484
GO:0034427	biological_process	nuclear-transcribed mRNA catabolic process, exonucleolytic, 3'-5'	4	2031	49	126412	0.00793028
GO:0006102	biological_process	isocitrate metabolic process	4	2031	49	126412	0.00793028
GO:0070847	cellular_component	core mediator complex	4	2031	49	126412	0.00793028
GO:0010411	biological_process	xyloglucan metabolic process	9	2031	215	126412	0.00849177
GO:0034475	biological_process	U4 snRNA 3'-end processing	4	2031	50	126412	0.00851212
GO:0010067	biological_process	procambium histogenesis	4	2031	50	126412	0.00851212
GO:0010598	cellular_component	NAD(P)H dehydrogenase complex (plastoquinone)	4	2031	50	126412	0.00851212
GO:0003858	molecular_function	3-hydroxybutyrate dehydrogenase activity	2	2031	9	126412	0.00861713
GO:0010089	biological_process	xylem development	11	2031	294	126412	0.00868938
GO:0006891	biological_process	intra-Golgi vesicle-mediated transport	9	2031	216	126412	0.00873814
GO:0016192	biological_process	vesicle-mediated transport	18	2031	595	126412	0.00876517
GO:0008080	molecular_function	N-acetyltransferase activity	5	2031	79	126412	0.00901002
GO:0009533	cellular_component	chloroplast stromal thylakoid	3	2031	27	126412	0.00908415
GO:0046785	biological_process	microtubule polymerization	4	2031	51	126412	0.00912117
GO:0030162	biological_process	regulation of proteolysis	4	2031	51	126412	0.00912117
GO:0000815	cellular_component	ESCRT III complex	4	2031	51	126412	0.00912117
GO:0005575	cellular_component	cellular_component	51	2031	2242	126412	0.00959146
GO:0033897	molecular_function	ribonuclease T2 activity	4	2031	52	126412	0.00975791
GO:0031463	cellular_component	Cul3-RING ubiquitin ligase complex	7	2031	148	126412	0.0103491
GO:0045116	biological_process	protein neddylation	4	2031	53	126412	0.0104228
GO:0061158	biological_process	3'-UTR-mediated mRNA destabilization	2	2031	10	126412	0.0106572
GO:0010025	biological_process	wax biosynthetic process	7	2031	149	126412	0.0107127
GO:0009229	biological_process	thiamine diphosphate biosynthetic process	3	2031	29	126412	0.0110822
GO:1901642	biological_process	nucleoside transmembrane transport	4	2031	54	126412	0.0111163
GO:0051260	biological_process	protein homooligomerization	4	2031	54	126412	0.0111163
GO:0005337	molecular_function	nucleoside transmembrane transporter activity	4	2031	54	126412	0.0111163
GO:0016798	molecular_function	hydrolase activity, acting on glycosyl bonds	9	2031	227	126412	0.0118188
GO:0008194	molecular_function	UDP-glycosyltransferase activity	5	2031	85	126412	0.0121287
GO:0009501	cellular_component	amyloplast	3	2031	30	126412	0.0121687
GO:0009739	biological_process	response to gibberellin	11	2031	311	126412	0.0128061
GO:0009902	biological_process	chloroplast relocation	3	2031	31	126412	0.013314
GO:0003700	molecular_function	DNA-binding transcription factor activity	157	2031	8190	126412	0.0133476
GO:0055085	biological_process	transmembrane transport	33	2031	1354	126412	0.0135273
GO:0000177	cellular_component	cytoplasmic exosome (RNase complex)	4	2031	58	126412	0.0141843
GO:0031519	cellular_component	PcG protein complex	3	2031	32	126412	0.0145187
GO:0080019	molecular_function	fatty-acyl-CoA reductase (alcohol-forming) activity	4	2031	59	126412	0.0150267
GO:0030015	cellular_component	CCR4-NOT core complex	4	2031	59	126412	0.0150267
GO:0006869	biological_process	lipid transport	13	2031	407	126412	0.0157733
GO:0004177	molecular_function	aminopeptidase activity	4	2031	60	126412	0.0159001
GO:0006338	biological_process	chromatin remodeling	9	2031	239	126412	0.0160333
GO:0006623	biological_process	protein targeting to vacuole	7	2031	162	126412	0.0163207
GO:0043130	molecular_function	ubiquitin binding	9	2031	240	126412	0.0164284
GO:1901657	biological_process	glycosyl compound metabolic process	5	2031	92	126412	0.0166058
GO:0016791	molecular_function	phosphatase activity	10	2031	282	126412	0.0168464
GO:0031267	molecular_function	small GTPase binding	3	2031	34	126412	0.0171074
GO:0061088	biological_process	regulation of sequestering of zinc ion	4	2031	62	126412	0.0177408
GO:0035336	biological_process	long-chain fatty-acyl-CoA metabolic process	4	2031	62	126412	0.0177408
GO:0010233	biological_process	phloem transport	3	2031	35	126412	0.0184919
GO:0016973	biological_process	poly(A)+ mRNA export from nucleus	3	2031	35	126412	0.0184919
GO:0008152	biological_process	metabolic process	13	2031	416	126412	0.0185086
GO:0031122	biological_process	cytoplasmic microtubule organization	7	2031	168	126412	0.0195057
GO:0005985	biological_process	sucrose metabolic process	5	2031	96	126412	0.0195995
GO:0035196	biological_process	production of miRNAs involved in gene silencing by miRNA	4	2031	64	126412	0.0197087
GO:0070125	biological_process	mitochondrial translational elongation	9	2031	248	126412	0.0198494
GO:0030488	biological_process	tRNA methylation	4	2031	65	126412	0.0207411
GO:0009773	biological_process	photosynthetic electron transport in photosystem I	4	2031	66	126412	0.021806
GO:0016887	molecular_function	ATPase activity	23	2031	903	126412	0.022451
GO:0042546	biological_process	cell wall biogenesis	9	2031	255	126412	0.023241
GO:0046856	biological_process	phosphatidylinositol dephosphorylation	5	2031	101	126412	0.0238115
GO:0005516	molecular_function	calmodulin binding	21	2031	814	126412	0.0249984
GO:0046982	molecular_function	protein heterodimerization activity	11	2031	345	126412	0.0252654
GO:0048528	biological_process	post-embryonic root development	5	2031	103	126412	0.0256472
GO:0048354	biological_process	mucilage biosynthetic process involved in seed coat development	3	2031	40	126412	0.0263208
GO:0080111	biological_process	DNA demethylation	3	2031	40	126412	0.0263208
GO:0071035	biological_process	nuclear polyadenylation-dependent rRNA catabolic process	4	2031	70	126412	0.0263959
GO:0006820	biological_process	anion transport	5	2031	104	126412	0.026598
GO:0047890	molecular_function	flavanone 4-reductase activity	2	2031	16	126412	0.0266675
GO:0045552	molecular_function	dihydrokaempferol 4-reductase activity	2	2031	16	126412	0.0266675
GO:0030968	biological_process	endoplasmic reticulum unfolded protein response	4	2031	71	126412	0.0276268
GO:0009654	cellular_component	photosystem II oxygen evolving complex	4	2031	71	126412	0.0276268
GO:0019264	biological_process	glycine biosynthetic process from serine	3	2031	41	126412	0.0280677
GO:0000176	cellular_component	nuclear exosome (RNase complex)	4	2031	72	126412	0.0288914
GO:0016554	biological_process	cytidine to uridine editing	5	2031	107	126412	0.029584
GO:0051301	biological_process	cell division	25	2031	1030	126412	0.02967
GO:0006491	biological_process	N-glycan processing	3	2031	42	126412	0.0298748
GO:0047787	molecular_function	delta4-3-oxosteroid 5beta-reductase activity	3	2031	42	126412	0.0298748
GO:0016705	molecular_function	oxidoreductase activity, acting on paired donors, with incorporation or reduction of molecular oxygen	7	2031	184	126412	0.0300639
GO:0005986	biological_process	sucrose biosynthetic process	5	2031	108	126412	0.0306242
GO:0048280	biological_process	vesicle fusion with Golgi apparatus	3	2031	43	126412	0.0317418
GO:0016412	molecular_function	serine O-acyltransferase activity	1	2031	2	126412	0.031875
GO:0030173	cellular_component	integral component of Golgi membrane	4	2031	75	126412	0.0328886
GO:0000159	cellular_component	protein phosphatase type 2A complex	4	2031	75	126412	0.0328886
GO:0016874	molecular_function	ligase activity	12	2031	406	126412	0.0332014
GO:0005515	molecular_function	protein binding	258	2031	14390	126412	0.0334443
GO:0007034	biological_process	vacuolar transport	4	2031	76	126412	0.034289
GO:0005786	cellular_component	signal recognition particle, endoplasmic reticulum targeting	4	2031	76	126412	0.034289
GO:0030170	molecular_function	pyridoxal phosphate binding	15	2031	549	126412	0.0343987
GO:0010405	biological_process	arabinogalactan protein metabolic process	3	2031	45	126412	0.0356543
GO:0018258	biological_process	protein O-linked glycosylation via hydroxyproline	3	2031	45	126412	0.0356543
GO:1990714	molecular_function	hydroxyproline O-galactosyltransferase activity	3	2031	45	126412	0.0356543
GO:0090351	biological_process	seedling development	4	2031	77	126412	0.0357236
GO:0019888	molecular_function	protein phosphatase regulator activity	4	2031	77	126412	0.0357236
GO:0045486	molecular_function	naringenin 3-dioxygenase activity	2	2031	19	126412	0.0368188
GO:0043245	cellular_component	extraorganismal space	2	2031	19	126412	0.0368188
GO:0008284	biological_process	positive regulation of cell population proliferation	4	2031	78	126412	0.0371924
GO:0045551	molecular_function	cinnamyl-alcohol dehydrogenase activity	5	2031	116	126412	0.0397715
GO:0006097	biological_process	glyoxylate cycle	4	2031	81	126412	0.0418044
GO:0010076	biological_process	maintenance of floral meristem identity	3	2031	48	126412	0.0419648
GO:0019827	biological_process	stem cell population maintenance	3	2031	48	126412	0.0419648
GO:0005525	molecular_function	GTP binding	20	2031	813	126412	0.0425167
GO:0070475	biological_process	rRNA base methylation	4	2031	82	126412	0.0434103
GO:0010020	biological_process	chloroplast fission	5	2031	119	126412	0.0435855
GO:0005759	cellular_component	mitochondrial matrix	12	2031	424	126412	0.043672
GO:0012507	cellular_component	ER to Golgi transport vesicle membrane	3	2031	49	126412	0.0441844
GO:0009611	biological_process	response to wounding	24	2031	1023	126412	0.0449649
GO:0009058	biological_process	biosynthetic process	8	2031	244	126412	0.0449687
GO:0017148	biological_process	negative regulation of translation	4	2031	83	126412	0.0450504
GO:0019239	molecular_function	deaminase activity	4	2031	83	126412	0.0450504
GO:0010077	biological_process	maintenance of inflorescence meristem identity	3	2031	50	126412	0.0464614
GO:0035999	biological_process	tetrahydrofolate interconversion	3	2031	50	126412	0.0464614
GO:0005385	molecular_function	zinc ion transmembrane transporter activity	6	2031	162	126412	0.0477003
GO:0070545	cellular_component	PeBoW complex	2	2031	22	126412	0.0481966
GO:0090630	biological_process	activation of GTPase activity	4	2031	85	126412	0.0484331
GO:0044255	biological_process	cellular lipid metabolic process	3	2031	51	126412	0.0487951
GO:0006544	biological_process	glycine metabolic process	3	2031	51	126412	0.0487951
GO:0004372	molecular_function	glycine hydroxymethyltransferase activity	3	2031	51	126412	0.0487951
GO:0036092	biological_process	phosphatidylinositol-3-phosphate biosynthetic process	2	2031	24	126412	0.056394
GO:0006397	biological_process	mRNA processing	19	2031	791	126412	0.0568171
GO:0003677	molecular_function	DNA binding	164	2031	9033	126412	0.0572671
GO:0010090	biological_process	trichome morphogenesis	6	2031	170	126412	0.0576407
GO:0042761	biological_process	very long-chain fatty acid biosynthetic process	3	2031	55	126412	0.0586871
GO:0008285	biological_process	negative regulation of cell population proliferation	4	2031	91	126412	0.0593965
GO:1902600	biological_process	proton transmembrane transport	4	2031	91	126412	0.0593965
GO:0045892	biological_process	negative regulation of transcription, DNA-templated	17	2031	695	126412	0.0601921
GO:0010205	biological_process	photoinhibition	3	2031	56	126412	0.0612964
GO:0008553	molecular_function	proton-exporting ATPase activity, phosphorylative mechanism	4	2031	92	126412	0.0613415
GO:0003697	molecular_function	single-stranded DNA binding	9	2031	307	126412	0.0619858
GO:0042794	biological_process	plastid rRNA transcription	1	2031	4	126412	0.0627345
GO:0010482	biological_process	regulation of epidermal cell division	1	2031	4	126412	0.0627345
GO:0061086	biological_process	negative regulation of histone H3-K27 methylation	1	2031	4	126412	0.0627345
GO:0008756	molecular_function	o-succinylbenzoate-CoA ligase activity	1	2031	4	126412	0.0627345
GO:0080148	biological_process	negative regulation of response to water deprivation	2	2031	26	126412	0.065036
GO:0012505	cellular_component	endomembrane system	20	2031	857	126412	0.0652084
GO:0015693	biological_process	magnesium ion transport	4	2031	94	126412	0.0653313
GO:1901001	biological_process	negative regulation of response to salt stress	3	2031	58	126412	0.0666738
GO:0031426	biological_process	polycistronic mRNA processing	2	2031	27	126412	0.0695122
GO:0009451	biological_process	RNA modification	20	2031	867	126412	0.0713464
GO:0048577	biological_process	negative regulation of short-day photoperiodism, flowering	2	2031	28	126412	0.0740859
GO:0046608	molecular_function	carotenoid isomerase activity	1	2031	5	126412	0.0777936
GO:0046408	molecular_function	chlorophyll synthetase activity	1	2031	5	126412	0.0777936
GO:0008378	molecular_function	galactosyltransferase activity	3	2031	63	126412	0.0810116
GO:0042802	molecular_function	identical protein binding	14	2031	573	126412	0.0825502
GO:0070072	biological_process	vacuolar proton-transporting V-type ATPase complex assembly	2	2031	30	126412	0.0835088
GO:0008934	molecular_function	inositol monophosphate 1-phosphatase activity	2	2031	30	126412	0.0835088
GO:0052747	molecular_function	sinapyl alcohol dehydrogenase activity	4	2031	103	126412	0.0848944
GO:0007389	biological_process	pattern specification process	3	2031	65	126412	0.0870886
GO:0010286	biological_process	heat acclimation	4	2031	104	126412	0.0872263
GO:0010569	biological_process	regulation of double-strand break repair via homologous recombination	2	2031	31	126412	0.0883498
GO:0009534	cellular_component	chloroplast thylakoid	15	2031	632	126412	0.0894749
GO:0016021	cellular_component	integral component of membrane	255	2031	14644	126412	0.0906144
GO:0031425	biological_process	chloroplast RNA processing	5	2031	148	126412	0.0913645
GO:0040019	biological_process	positive regulation of embryonic development	1	2031	6	126412	0.0926108
GO:0019863	molecular_function	IgE binding	2	2031	32	126412	0.0932719
GO:0048229	biological_process	gametophyte development	3	2031	68	126412	0.096551
GO:0045087	biological_process	innate immune response	10	2031	387	126412	0.0976811
GO:0000288	biological_process	nuclear-transcribed mRNA catabolic process, deadenylation-dependent decay	4	2031	109	126412	0.099341
GO:0010305	biological_process	leaf vascular tissue pattern formation	5	2031	153	126412	0.10155
GO:0030095	cellular_component	chloroplast photosystem II	3	2031	70	126412	0.103081
GO:0004674	molecular_function	protein serine/threonine kinase activity	90	2031	4895	126412	0.105735
GO:0009295	cellular_component	nucleoid	5	2031	155	126412	0.105777
GO:0006474	biological_process	N-terminal protein amino acid acetylation	4	2031	112	126412	0.106964
GO:0034059	biological_process	response to anoxia	1	2031	7	126412	0.10719
GO:0006635	biological_process	fatty acid beta-oxidation	4	2031	114	126412	0.112188
GO:0010449	biological_process	root meristem growth	3	2031	73	126412	0.113191
GO:0010508	biological_process	positive regulation of autophagy	2	2031	36	126412	0.113695
GO:0004616	molecular_function	phosphogluconate dehydrogenase (decarboxylating) activity	2	2031	36	126412	0.113695
GO:0009646	biological_process	response to absence of light	4	2031	115	126412	0.114841
GO:1900056	biological_process	negative regulation of leaf senescence	3	2031	74	126412	0.116642
GO:0016226	biological_process	iron-sulfur cluster assembly	4	2031	116	126412	0.117522
GO:0003756	molecular_function	protein disulfide isomerase activity	4	2031	116	126412	0.117522
GO:0016853	molecular_function	isomerase activity	4	2031	116	126412	0.117522
GO:0000302	biological_process	response to reactive oxygen species	5	2031	161	126412	0.118962
GO:0042578	molecular_function	phosphoric ester hydrolase activity	2	2031	37	126412	0.118967
GO:0006563	biological_process	L-serine metabolic process	3	2031	76	126412	0.123659
GO:0050660	molecular_function	flavin adenine dinucleotide binding	10	2031	407	126412	0.123907
GO:0004029	molecular_function	aldehyde dehydrogenase (NAD) activity	4	2031	119	126412	0.125726
GO:0009787	biological_process	regulation of abscisic acid-activated signaling pathway	3	2031	78	126412	0.130825
GO:0080092	biological_process	regulation of pollen tube growth	4	2031	122	126412	0.134164
GO:0003727	molecular_function	single-stranded RNA binding	4	2031	122	126412	0.134164
GO:0010120	biological_process	camalexin biosynthetic process	2	2031	40	126412	0.135125
GO:0010043	biological_process	response to zinc ion	5	2031	168	126412	0.135264
GO:0008017	molecular_function	microtubule binding	9	2031	364	126412	0.135475
GO:0042561	molecular_function	alpha-amyrin synthase activity	1	2031	9	126412	0.13565
GO:0006020	biological_process	inositol metabolic process	2	2031	41	126412	0.140616
GO:0070370	biological_process	cellular heat acclimation	2	2031	41	126412	0.140616
GO:0007035	biological_process	vacuolar acidification	2	2031	41	126412	0.140616
GO:0010582	biological_process	floral meristem determinacy	3	2031	81	126412	0.141838
GO:0009908	biological_process	flower development	18	2031	846	126412	0.142497
GO:0035671	molecular_function	enone reductase activity	3	2031	82	126412	0.145576
GO:0008483	molecular_function	transaminase activity	4	2031	126	126412	0.145759
GO:0019825	molecular_function	oxygen binding	7	2031	271	126412	0.148869
GO:0005415	molecular_function	nucleoside:sodium symporter activity	1	2031	10	126412	0.149538
GO:0016614	molecular_function	oxidoreductase activity, acting on CH-OH group of donors	6	2031	222	126412	0.149577
GO:0009543	cellular_component	chloroplast thylakoid lumen	6	2031	222	126412	0.149577
GO:0050661	molecular_function	NADP binding	4	2031	128	126412	0.151699
GO:0001510	biological_process	RNA methylation	2	2031	43	126412	0.151734
GO:0005875	cellular_component	microtubule associated complex	3	2031	84	126412	0.153147
GO:0003729	molecular_function	mRNA binding	27	2031	1358	126412	0.154668
GO:0030048	biological_process	actin filament-based movement	3	2031	85	126412	0.156978
GO:0006631	biological_process	fatty acid metabolic process	7	2031	278	126412	0.162883
GO:0009662	biological_process	etioplast organization	1	2031	11	126412	0.163203
GO:0010377	biological_process	guard cell fate commitment	1	2031	11	126412	0.163203
GO:0034968	biological_process	histone lysine methylation	4	2031	132	126412	0.163845
GO:0005200	molecular_function	structural constituent of cytoskeleton	5	2031	180	126412	0.165334
GO:0009535	cellular_component	chloroplast thylakoid membrane	28	2031	1430	126412	0.168209
GO:0080163	biological_process	regulation of protein serine/threonine phosphatase activity	4	2031	134	126412	0.170045
GO:0070534	biological_process	protein K63-linked ubiquitination	2	2031	47	126412	0.174442
GO:0022821	molecular_function	potassium ion antiporter activity	2	2031	47	126412	0.174442
GO:0000183	biological_process	chromatin silencing at rDNA	1	2031	12	126412	0.176649
GO:0060774	biological_process	auxin mediated signaling pathway involved in phyllotactic patterning	1	2031	12	126412	0.176649
GO:0060771	biological_process	phyllotactic patterning	1	2031	12	126412	0.176649
GO:0009903	biological_process	chloroplast avoidance movement	3	2031	91	126412	0.180549
GO:0015095	molecular_function	magnesium ion transmembrane transporter activity	4	2031	138	126412	0.182685
GO:0009910	biological_process	negative regulation of flower development	4	2031	139	126412	0.185892
GO:0008219	biological_process	cell death	4	2031	140	126412	0.189118
GO:0034613	biological_process	cellular protein localization	1	2031	13	126412	0.189878
GO:0000028	biological_process	ribosomal small subunit assembly	4	2031	141	126412	0.192361
GO:0006349	biological_process	regulation of gene expression by genetic imprinting	3	2031	94	126412	0.192673
GO:0009873	biological_process	ethylene-activated signaling pathway	27	2031	1403	126412	0.196084
GO:0005096	molecular_function	GTPase activator activity	8	2031	346	126412	0.196135
GO:0005677	cellular_component	chromatin silencing complex	3	2031	96	126412	0.200866
GO:0009964	biological_process	negative regulation of flavonoid biosynthetic process	1	2031	14	126412	0.202895
GO:0033729	molecular_function	anthocyanidin reductase activity	1	2031	14	126412	0.202895
GO:0016422	molecular_function	mRNA (2'-O-methyladenosine-N6-)-methyltransferase activity	1	2031	14	126412	0.202895
GO:0036396	cellular_component	RNA N6-methyladenosine methyltransferase complex	1	2031	14	126412	0.202895
GO:1901002	biological_process	positive regulation of response to salt stress	2	2031	52	126412	0.203499
GO:0016573	biological_process	histone acetylation	4	2031	145	126412	0.205502
GO:0006308	biological_process	DNA catabolic process	2	2031	53	126412	0.209376
GO:0006949	biological_process	syncytium formation	3	2031	99	126412	0.213303
GO:0004864	molecular_function	protein phosphatase inhibitor activity	4	2031	148	126412	0.215524
GO:0006400	biological_process	tRNA modification	5	2031	200	126412	0.220499
GO:0043068	biological_process	positive regulation of programmed cell death	2	2031	56	126412	0.2271
GO:2000769	biological_process	regulation of establishment or maintenance of cell polarity regulating cell shape	1	2031	16	126412	0.228306
GO:0051453	biological_process	regulation of intracellular pH	4	2031	152	126412	0.229087
GO:0046855	biological_process	inositol phosphate dephosphorylation	2	2031	57	126412	0.233033
GO:0005886	cellular_component	plasma membrane	300	2031	17942	126412	0.234623
GO:0032502	biological_process	developmental process	5	2031	205	126412	0.235093
GO:0003712	molecular_function	transcription coregulator activity	4	2031	154	126412	0.235947
GO:0009816	biological_process	defense response to bacterium, incompatible interaction	9	2031	420	126412	0.237145
GO:0006897	biological_process	endocytosis	7	2031	313	126412	0.240697
GO:0071497	biological_process	cellular response to freezing	1	2031	17	126412	0.240706
GO:0010224	biological_process	response to UV-B	6	2031	260	126412	0.241924
GO:0051103	biological_process	DNA ligation involved in DNA repair	2	2031	59	126412	0.244922
GO:0003910	molecular_function	DNA ligase (ATP) activity	2	2031	59	126412	0.244922
GO:0030267	molecular_function	glyoxylate reductase (NADP) activity	2	2031	59	126412	0.244922
GO:0010427	molecular_function	abscisic acid binding	4	2031	157	126412	0.246326
GO:0031977	cellular_component	thylakoid lumen	4	2031	158	126412	0.249808
GO:0045595	biological_process	regulation of cell differentiation	1	2031	18	126412	0.252907
GO:0019901	molecular_function	protein kinase binding	3	2031	109	126412	0.255787
GO:0006401	biological_process	RNA catabolic process	2	2031	61	126412	0.256834
GO:0009637	biological_process	response to blue light	3	2031	110	126412	0.260103
GO:0010029	biological_process	regulation of seed germination	3	2031	111	126412	0.264428
GO:0060772	biological_process	leaf phyllotactic patterning	1	2031	19	126412	0.264912
GO:0006364	biological_process	rRNA processing	7	2031	327	126412	0.2747
GO:0006497	biological_process	protein lipidation	1	2031	20	126412	0.276724
GO:0032266	molecular_function	phosphatidylinositol-3-phosphate binding	1	2031	20	126412	0.276724
GO:0030145	molecular_function	manganese ion binding	3	2031	114	126412	0.277453
GO:0006099	biological_process	tricarboxylic acid cycle	4	2031	166	126412	0.278005
GO:0006273	biological_process	lagging strand elongation	2	2031	65	126412	0.280669
GO:0007033	biological_process	vacuole organization	2	2031	66	126412	0.286621
GO:0005622	cellular_component	intracellular	27	2031	1495	126412	0.295555
GO:0061630	molecular_function	ubiquitin protein ligase activity	28	2031	1555	126412	0.296583
GO:0031969	cellular_component	chloroplast membrane	8	2031	393	126412	0.299319
GO:0046323	biological_process	glucose import	7	2031	337	126412	0.299701
GO:0005355	molecular_function	glucose transmembrane transporter activity	7	2031	337	126412	0.299701
GO:0004519	molecular_function	endonuclease activity	21	2031	1147	126412	0.302546
GO:0003730	molecular_function	mRNA 3'-UTR binding	2	2031	69	126412	0.30444
GO:0017056	molecular_function	structural constituent of nuclear pore	3	2031	121	126412	0.308044
GO:0000463	biological_process	maturation of LSU-rRNA from tricistronic rRNA transcript (SSU-rRNA, 5.8S rRNA, LSU-rRNA)	2	2031	70	126412	0.310362
GO:0010239	biological_process	chloroplast mRNA processing	1	2031	23	126412	0.311034
GO:1901141	biological_process	regulation of lignin biosynthetic process	1	2031	24	126412	0.322105
GO:0010374	biological_process	stomatal complex development	1	2031	24	126412	0.322105
GO:0080025	molecular_function	phosphatidylinositol-3,5-bisphosphate binding	1	2031	24	126412	0.322105
GO:0051276	biological_process	chromosome organization	3	2031	126	126412	0.329971
GO:0005506	molecular_function	iron ion binding	8	2031	411	126412	0.341831
GO:0004032	molecular_function	alditol:NADP+ 1-oxidoreductase activity	1	2031	26	126412	0.343717
GO:0070401	molecular_function	NADP+ binding	1	2031	26	126412	0.343717
GO:0016229	molecular_function	steroid dehydrogenase activity	1	2031	26	126412	0.343717
GO:0004672	molecular_function	protein kinase activity	25	2031	1418	126412	0.346883
GO:0006896	biological_process	Golgi to vacuole transport	3	2031	130	126412	0.347501
GO:0009738	biological_process	abscisic acid-activated signaling pathway	20	2031	1121	126412	0.348903
GO:0080009	biological_process	mRNA methylation	1	2031	27	126412	0.354264
GO:0015934	cellular_component	large ribosomal subunit	1	2031	27	126412	0.354264
GO:0009658	biological_process	chloroplast organization	11	2031	592	126412	0.355435
GO:0009931	molecular_function	calcium-dependent protein serine/threonine kinase activity	4	2031	188	126412	0.357395
GO:0004683	molecular_function	calmodulin-dependent protein kinase activity	4	2031	188	126412	0.357395
GO:0006879	biological_process	cellular iron ion homeostasis	2	2031	79	126412	0.363049
GO:0009718	biological_process	anthocyanin-containing compound biosynthetic process	2	2031	79	126412	0.363049
GO:0051015	molecular_function	actin filament binding	5	2031	247	126412	0.364932
GO:0009813	biological_process	flavonoid biosynthetic process	20	2031	1135	126412	0.369212
GO:0030071	biological_process	regulation of mitotic metaphase/anaphase transition	1	2031	29	126412	0.374851
GO:0004559	molecular_function	alpha-mannosidase activity	1	2031	29	126412	0.374851
GO:0080044	molecular_function	quercetin 7-O-glucosyltransferase activity	17	2031	961	126412	0.377984
GO:0080043	molecular_function	quercetin 3-O-glucosyltransferase activity	17	2031	961	126412	0.377984
GO:0010008	cellular_component	endosome membrane	4	2031	195	126412	0.382787
GO:0007169	biological_process	transmembrane receptor protein tyrosine kinase signaling pathway	16	2031	905	126412	0.384363
GO:0071577	biological_process	zinc ion transmembrane transport	2	2031	83	126412	0.38599
GO:0003690	molecular_function	double-stranded DNA binding	7	2031	371	126412	0.387313
GO:0016829	molecular_function	lyase activity	9	2031	491	126412	0.39175
GO:0009707	cellular_component	chloroplast outer membrane	4	2031	198	126412	0.393639
GO:0042372	biological_process	phylloquinone biosynthetic process	1	2031	31	126412	0.394782
GO:0006464	biological_process	cellular protein modification process	4	2031	200	126412	0.400857
GO:0006013	biological_process	mannose metabolic process	1	2031	32	126412	0.404508
GO:0033314	biological_process	mitotic DNA replication checkpoint	1	2031	32	126412	0.404508
GO:0006468	biological_process	protein phosphorylation	75	2031	4522	126412	0.405321
GO:0010048	biological_process	vernalization response	2	2031	87	126412	0.40856
GO:0003682	molecular_function	chromatin binding	15	2031	860	126412	0.409964
GO:0009055	molecular_function	electron transfer activity	10	2031	559	126412	0.410079
GO:0009553	biological_process	embryo sac development	5	2031	262	126412	0.412371
GO:0009830	biological_process	cell wall modification involved in abscission	1	2031	33	126412	0.414078
GO:0010444	biological_process	guard mother cell differentiation	1	2031	33	126412	0.414078
GO:0009399	biological_process	nitrogen fixation	1	2031	33	126412	0.414078
GO:0009690	biological_process	cytokinin metabolic process	2	2031	88	126412	0.414139
GO:0044403	biological_process	symbiont process	1	2031	34	126412	0.423494
GO:0000379	biological_process	tRNA-type intron splice site recognition and cleavage	1	2031	34	126412	0.423494
GO:0015299	molecular_function	solute:proton antiporter activity	1	2031	34	126412	0.423494
GO:0000213	molecular_function	tRNA-intron endonuclease activity	1	2031	34	126412	0.423494
GO:0000214	cellular_component	tRNA-intron endonuclease complex	1	2031	34	126412	0.423494
GO:0000347	cellular_component	THO complex	1	2031	34	126412	0.423494
GO:0004520	molecular_function	endodeoxyribonuclease activity	2	2031	91	126412	0.430716
GO:0003333	biological_process	amino acid transmembrane transport	7	2031	390	126412	0.436735
GO:0016301	molecular_function	kinase activity	63	2031	3824	126412	0.437208
GO:0007143	biological_process	female meiotic nuclear division	1	2031	36	126412	0.441875
GO:0034497	biological_process	protein localization to phagophore assembly site	1	2031	36	126412	0.441875
GO:0051213	molecular_function	dioxygenase activity	13	2031	761	126412	0.450215
GO:0031902	cellular_component	late endosome membrane	3	2031	155	126412	0.454794
GO:0052696	biological_process	flavonoid glucuronidation	17	2031	1009	126412	0.45522
GO:0031461	cellular_component	cullin-RING ubiquitin ligase complex	3	2031	156	126412	0.458949
GO:1901409	biological_process	positive regulation of phosphorylation of RNA polymerase II C-terminal domain	1	2031	38	126412	0.45967
GO:0016298	molecular_function	lipase activity	6	2031	340	126412	0.46541
GO:0042793	biological_process	plastid transcription	1	2031	40	126412	0.476899
GO:0010389	biological_process	regulation of G2/M transition of mitotic cell cycle	1	2031	41	126412	0.485306
GO:0004176	molecular_function	ATP-dependent peptidase activity	4	2031	226	126412	0.492557
GO:0045737	biological_process	positive regulation of cyclin-dependent protein serine/threonine kinase activity	1	2031	42	126412	0.493578
GO:0009901	biological_process	anther dehiscence	2	2031	103	126412	0.494364
GO:0002237	biological_process	response to molecule of bacterial origin	2	2031	104	126412	0.499462
GO:0008234	molecular_function	cysteine-type peptidase activity	2	2031	104	126412	0.499462
GO:1900425	biological_process	negative regulation of defense response to bacterium	1	2031	43	126412	0.501717
GO:0009870	biological_process	defense response signaling pathway, resistance gene-dependent	1	2031	43	126412	0.501717
GO:0042300	molecular_function	beta-amyrin synthase activity	1	2031	43	126412	0.501717
GO:0008380	biological_process	RNA splicing	7	2031	416	126412	0.503205
GO:0009789	biological_process	positive regulation of abscisic acid-activated signaling pathway	3	2031	167	126412	0.503699
GO:0009555	biological_process	pollen development	12	2031	729	126412	0.50607
GO:0071369	biological_process	cellular response to ethylene stimulus	1	2031	44	126412	0.509725
GO:0006353	biological_process	DNA-templated transcription, termination	1	2031	44	126412	0.509725
GO:0005351	molecular_function	carbohydrate:proton symporter activity	7	2031	420	126412	0.513218
GO:0000976	molecular_function	transcription regulatory region sequence-specific DNA binding	6	2031	358	126412	0.51487
GO:0016559	biological_process	peroxisome fission	1	2031	45	126412	0.517605
GO:0004439	molecular_function	phosphatidylinositol-4,5-bisphosphate 5-phosphatase activity	2	2031	108	126412	0.519519
GO:0034045	cellular_component	phagophore assembly site membrane	1	2031	46	126412	0.525358
GO:0042147	biological_process	retrograde transport, endosome to Golgi	3	2031	174	126412	0.531158
GO:0019252	biological_process	starch biosynthetic process	3	2031	174	126412	0.531158
GO:0043067	biological_process	regulation of programmed cell death	1	2031	47	126412	0.532987
GO:0006517	biological_process	protein deglycosylation	1	2031	47	126412	0.532987
GO:0016310	biological_process	phosphorylation	20	2031	1248	126412	0.535482
GO:0004497	molecular_function	monooxygenase activity	11	2031	682	126412	0.536249
GO:0015171	molecular_function	amino acid transmembrane transporter activity	7	2031	430	126412	0.537926
GO:0009579	cellular_component	thylakoid	10	2031	620	126412	0.538484
GO:0090406	cellular_component	pollen tube	4	2031	240	126412	0.539461
GO:0008106	molecular_function	alcohol dehydrogenase (NADP+) activity	1	2031	48	126412	0.540493
GO:0042803	molecular_function	protein homodimerization activity	13	2031	811	126412	0.54146
GO:0042538	biological_process	hyperosmotic salinity response	4	2031	241	126412	0.542727
GO:0008422	molecular_function	beta-glucosidase activity	5	2031	307	126412	0.549113
GO:0000819	biological_process	sister chromatid segregation	1	2031	50	126412	0.555145
GO:0010026	biological_process	trichome differentiation	1	2031	50	126412	0.555145
GO:0048765	biological_process	root hair cell differentiation	1	2031	50	126412	0.555145
GO:0042255	biological_process	ribosome assembly	1	2031	50	126412	0.555145
GO:0044774	biological_process	mitotic DNA integrity checkpoint	1	2031	50	126412	0.555145
GO:0004356	molecular_function	glutamate-ammonia ligase activity	1	2031	50	126412	0.555145
GO:0050662	molecular_function	coenzyme binding	4	2031	245	126412	0.55567
GO:0003746	molecular_function	translation elongation factor activity	10	2031	629	126412	0.556688
GO:0005802	cellular_component	trans-Golgi network	20	2031	1263	126412	0.556958
GO:0001056	molecular_function	RNA polymerase III activity	3	2031	181	126412	0.557741
GO:0005666	cellular_component	RNA polymerase III complex	3	2031	181	126412	0.557741
GO:0006606	biological_process	protein import into nucleus	3	2031	183	126412	0.565168
GO:0006268	biological_process	DNA unwinding involved in DNA replication	2	2031	118	126412	0.567254
GO:1900865	biological_process	chloroplast RNA modification	2	2031	118	126412	0.567254
GO:0009846	biological_process	pollen germination	4	2031	249	126412	0.568415
GO:0003713	molecular_function	transcription coactivator activity	5	2031	314	126412	0.569044
GO:0007166	biological_process	cell surface receptor signaling pathway	13	2031	828	126412	0.571383
GO:0010204	biological_process	defense response signaling pathway, resistance gene-independent	1	2031	53	126412	0.576253
GO:0010047	biological_process	fruit dehiscence	1	2031	53	126412	0.576253
GO:0030422	biological_process	production of siRNA involved in RNA interference	5	2031	319	126412	0.582997
GO:0030687	cellular_component	preribosome, large subunit precursor	3	2031	189	126412	0.586982
GO:0010267	biological_process	production of ta-siRNAs involved in RNA interference	1	2031	55	126412	0.589765
GO:0010091	biological_process	trichome branching	2	2031	124	126412	0.594206
GO:0030136	cellular_component	clathrin-coated vesicle	2	2031	124	126412	0.594206
GO:0051782	biological_process	negative regulation of cell division	1	2031	57	126412	0.602847
GO:0048443	biological_process	stamen development	1	2031	57	126412	0.602847
GO:0008239	molecular_function	dipeptidyl-peptidase activity	1	2031	57	126412	0.602847
GO:0008568	molecular_function	microtubule-severing ATPase activity	2	2031	126	126412	0.602907
GO:0009850	biological_process	auxin metabolic process	2	2031	127	126412	0.607203
GO:0005680	cellular_component	anaphase-promoting complex	1	2031	59	126412	0.615512
GO:0000981	molecular_function	DNA-binding transcription factor activity, RNA polymerase II-specific	13	2031	855	126412	0.617208
GO:0000932	cellular_component	P-body	4	2031	266	126412	0.62021
GO:0005543	molecular_function	phospholipid binding	2	2031	131	126412	0.624036
GO:0009631	biological_process	cold acclimation	3	2031	200	126412	0.625105
GO:0004712	molecular_function	protein serine/threonine/tyrosine kinase activity	4	2031	268	126412	0.626039
GO:0051539	molecular_function	4 iron, 4 sulfur cluster binding	4	2031	268	126412	0.626039
GO:0000307	cellular_component	cyclin-dependent protein kinase holoenzyme complex	1	2031	61	126412	0.627773
GO:0090333	biological_process	regulation of stomatal closure	3	2031	201	126412	0.628448
GO:0010193	biological_process	response to ozone	4	2031	269	126412	0.628933
GO:0006032	biological_process	chitin catabolic process	3	2031	202	126412	0.631771
GO:0008237	molecular_function	metallopeptidase activity	4	2031	270	126412	0.631812
GO:0009330	cellular_component	DNA topoisomerase complex (ATP-hydrolyzing)	1	2031	62	126412	0.633757
GO:0071554	biological_process	cell wall organization or biogenesis	4	2031	271	126412	0.634676
GO:0001135	molecular_function	RNA polymerase II transcription regulator recruiting activity	8	2031	539	126412	0.636929
GO:0016208	molecular_function	AMP binding	1	2031	63	126412	0.639644
GO:0046983	molecular_function	protein dimerization activity	17	2031	1133	126412	0.645119
GO:0034605	biological_process	cellular response to heat	3	2031	207	126412	0.648072
GO:0016413	molecular_function	O-acetyltransferase activity	4	2031	276	126412	0.648781
GO:0044804	biological_process	autophagy of nucleus	1	2031	65	126412	0.651136
GO:0031491	molecular_function	nucleosome binding	1	2031	65	126412	0.651136
GO:0005635	cellular_component	nuclear envelope	3	2031	209	126412	0.654447
GO:0071732	biological_process	cellular response to nitric oxide	1	2031	66	126412	0.656744
GO:0004693	molecular_function	cyclin-dependent protein serine/threonine kinase activity	3	2031	211	126412	0.660738
GO:0017196	biological_process	N-terminal peptidyl-methionine acetylation	1	2031	67	126412	0.662261
GO:0005783	cellular_component	endoplasmic reticulum	40	2031	2636	126412	0.665226
GO:0016758	molecular_function	transferase activity, transferring hexosyl groups	3	2031	213	126412	0.666946
GO:0016126	biological_process	sterol biosynthetic process	2	2031	142	126412	0.667428
GO:0045335	cellular_component	phagocytic vesicle	1	2031	68	126412	0.667691
GO:0016759	molecular_function	cellulose synthase activity	3	2031	214	126412	0.670019
GO:0000422	biological_process	autophagy of mitochondrion	1	2031	69	126412	0.673033
GO:0009636	biological_process	response to toxic substance	1	2031	69	126412	0.673033
GO:0009861	biological_process	jasmonic acid and ethylene-dependent systemic resistance	1	2031	70	126412	0.678289
GO:0048367	biological_process	shoot system development	3	2031	218	126412	0.682101
GO:0004033	molecular_function	aldo-keto reductase (NADP) activity	1	2031	71	126412	0.68346
GO:0016929	molecular_function	SUMO-specific protease activity	1	2031	71	126412	0.68346
GO:0010017	biological_process	red or far-red light signaling pathway	4	2031	289	126412	0.683727
GO:0016926	biological_process	protein desumoylation	1	2031	72	126412	0.688549
GO:0048510	biological_process	regulation of timing of transition from vegetative to reproductive phase	3	2031	221	126412	0.690945
GO:0010152	biological_process	pollen maturation	1	2031	73	126412	0.693556
GO:0009641	biological_process	shade avoidance	1	2031	73	126412	0.693556
GO:0019745	biological_process	pentacyclic triterpenoid biosynthetic process	1	2031	74	126412	0.698482
GO:0008150	biological_process	biological_process	252	2031	16145	126412	0.69959
GO:0005623	cellular_component	cell	3	2031	227	126412	0.708072
GO:0005834	cellular_component	heterotrimeric G-protein complex	4	2031	299	126412	0.708894
GO:0048830	biological_process	adventitious root development	1	2031	77	126412	0.712791
GO:0009832	biological_process	plant-type cell wall biogenesis	3	2031	230	126412	0.716358
GO:0016117	biological_process	carotenoid biosynthetic process	1	2031	78	126412	0.717408
GO:0009960	biological_process	endosperm development	3	2031	231	126412	0.719079
GO:0045454	biological_process	cell redox homeostasis	7	2031	515	126412	0.721584
GO:0008061	molecular_function	chitin binding	3	2031	233	126412	0.724461
GO:0004568	molecular_function	chitinase activity	3	2031	239	126412	0.74012
GO:0030276	molecular_function	clathrin binding	2	2031	164	126412	0.741982
GO:0009625	biological_process	response to insect	1	2031	84	126412	0.743595
GO:0048653	biological_process	anther development	2	2031	166	126412	0.747995
GO:0033612	molecular_function	receptor serine/threonine kinase binding	1	2031	87	126412	0.755764
GO:0010218	biological_process	response to far red light	4	2031	320	126412	0.756903
GO:0006633	biological_process	fatty acid biosynthetic process	7	2031	536	126412	0.758277
GO:0006457	biological_process	protein folding	18	2031	1291	126412	0.759427
GO:0010019	biological_process	chloroplast-nucleus signaling pathway	1	2031	89	126412	0.763554
GO:0031930	biological_process	mitochondria-nucleus signaling pathway	1	2031	89	126412	0.763554
GO:0043023	molecular_function	ribosomal large subunit binding	1	2031	89	126412	0.763554
GO:0042254	biological_process	ribosome biogenesis	3	2031	249	126412	0.764637
GO:0016538	molecular_function	cyclin-dependent protein serine/threonine kinase regulator activity	2	2031	173	126412	0.7681
GO:0010052	biological_process	guard cell differentiation	1	2031	91	126412	0.771096
GO:0000712	biological_process	resolution of meiotic recombination intermediates	1	2031	91	126412	0.771096
GO:0009860	biological_process	pollen tube growth	7	2031	544	126412	0.7713
GO:0005643	cellular_component	nuclear pore	3	2031	253	126412	0.773902
GO:0051567	biological_process	histone H3-K9 methylation	1	2031	92	126412	0.774777
GO:0016032	biological_process	viral process	8	2031	618	126412	0.776165
GO:0009814	biological_process	defense response, incompatible interaction	1	2031	94	126412	0.781961
GO:0042644	cellular_component	chloroplast nucleoid	1	2031	94	126412	0.781961
GO:0046777	biological_process	protein autophosphorylation	13	2031	976	126412	0.788078
GO:0006270	biological_process	DNA replication initiation	1	2031	96	126412	0.788916
GO:0048829	biological_process	root cap development	1	2031	98	126412	0.795649
GO:0002239	biological_process	response to oomycetes	1	2031	99	126412	0.798935
GO:0003918	molecular_function	DNA topoisomerase type II (ATP-hydrolyzing) activity	1	2031	99	126412	0.798935
GO:0009817	biological_process	defense response to fungus, incompatible interaction	1	2031	100	126412	0.802168
GO:0006357	biological_process	regulation of transcription by RNA polymerase II	19	2031	1403	126412	0.803735
GO:0000785	cellular_component	chromatin	4	2031	345	126412	0.805789
GO:0006888	biological_process	endoplasmic reticulum to Golgi vesicle-mediated transport	3	2031	268	126412	0.806009
GO:0009809	biological_process	lignin biosynthetic process	6	2031	495	126412	0.807178
GO:0020037	molecular_function	heme binding	9	2031	723	126412	0.82111
GO:0000055	biological_process	ribosomal large subunit export from nucleus	1	2031	107	126412	0.82339
GO:0071555	biological_process	cell wall organization	15	2031	1150	126412	0.824799
GO:0009828	biological_process	plant-type cell wall loosening	2	2031	198	126412	0.828877
GO:0048366	biological_process	leaf development	5	2031	436	126412	0.830145
GO:0045893	biological_process	positive regulation of transcription, DNA-templated	20	2031	1503	126412	0.830958
GO:0005528	molecular_function	FK506 binding	2	2031	199	126412	0.83098
GO:0035091	molecular_function	phosphatidylinositol binding	3	2031	284	126412	0.835931
GO:0051082	molecular_function	unfolded protein binding	4	2031	364	126412	0.837334
GO:0009705	cellular_component	plant-type vacuole membrane	7	2031	593	126412	0.839918
GO:0045735	molecular_function	nutrient reservoir activity	2	2031	211	126412	0.854452
GO:0000987	molecular_function	proximal promoter sequence-specific DNA binding	3	2031	296	126412	0.85568
GO:0010187	biological_process	negative regulation of seed germination	1	2031	120	126412	0.85695
GO:0009615	biological_process	response to virus	7	2031	608	126412	0.857294
GO:0005507	molecular_function	copper ion binding	8	2031	688	126412	0.863015
GO:0003723	molecular_function	RNA binding	54	2031	3859	126412	0.866643
GO:0006406	biological_process	mRNA export from nucleus	1	2031	126	126412	0.87021
GO:0016722	molecular_function	oxidoreductase activity, oxidizing metal ions	2	2031	221	126412	0.871695
GO:0000045	biological_process	autophagosome assembly	1	2031	127	126412	0.872297
GO:0005484	molecular_function	SNAP receptor activity	3	2031	308	126412	0.873317
GO:0006974	biological_process	cellular response to DNA damage stimulus	1	2031	128	126412	0.874351
GO:0070062	cellular_component	extracellular exosome	1	2031	128	126412	0.874351
GO:0016757	molecular_function	transferase activity, transferring glycosyl groups	18	2031	1432	126412	0.880874
GO:0015995	biological_process	chlorophyll biosynthetic process	1	2031	132	126412	0.882241
GO:0006265	biological_process	DNA topological change	1	2031	133	126412	0.884135
GO:0006312	biological_process	mitotic recombination	1	2031	134	126412	0.885999
GO:0071472	biological_process	cellular response to salt stress	1	2031	134	126412	0.885999
GO:0016788	molecular_function	hydrolase activity, acting on ester bonds	6	2031	560	126412	0.886638
GO:0016311	biological_process	dephosphorylation	2	2031	231	126412	0.887039
GO:0010118	biological_process	stomatal movement	1	2031	135	126412	0.887832
GO:0004596	molecular_function	peptide alpha-N-acetyltransferase activity	1	2031	135	126412	0.887832
GO:0000149	molecular_function	SNARE binding	3	2031	320	126412	0.889017
GO:0009751	biological_process	response to salicylic acid	7	2031	644	126412	0.892775
GO:0035556	biological_process	intracellular signal transduction	11	2031	947	126412	0.894397
GO:0051287	molecular_function	NAD binding	2	2031	239	126412	0.89807
GO:0080167	biological_process	response to karrikin	4	2031	412	126412	0.898366
GO:0031201	cellular_component	SNARE complex	3	2031	329	126412	0.899624
GO:0006749	biological_process	glutathione metabolic process	4	2031	416	126412	0.902402
GO:0004190	molecular_function	aspartic-type endopeptidase activity	10	2031	884	126412	0.902501
GO:0030163	biological_process	protein catabolic process	6	2031	579	126412	0.903837
GO:0008094	molecular_function	DNA-dependent ATPase activity	1	2031	147	126412	0.907666
GO:0048364	biological_process	root development	8	2031	740	126412	0.907995
GO:0010018	biological_process	far-red light signaling pathway	3	2031	339	126412	0.91033
GO:0010311	biological_process	lateral root formation	2	2031	249	126412	0.910446
GO:0000160	biological_process	phosphorelay signal transduction system	2	2031	250	126412	0.911603
GO:0018105	biological_process	peptidyl-serine phosphorylation	4	2031	429	126412	0.914557
GO:0009909	biological_process	regulation of flower development	3	2031	349	126412	0.919989
GO:0004386	molecular_function	helicase activity	3	2031	349	126412	0.919989
GO:0003887	molecular_function	DNA-directed DNA polymerase activity	4	2031	439	126412	0.922967
GO:0031047	biological_process	gene silencing by RNA	1	2031	160	126412	0.925217
GO:0003964	molecular_function	RNA-directed DNA polymerase activity	6	2031	610	126412	0.927075
GO:0042753	biological_process	positive regulation of circadian rhythm	3	2031	358	126412	0.927858
GO:0050832	biological_process	defense response to fungus	11	2031	1004	126412	0.929339
GO:0045944	biological_process	positive regulation of transcription by RNA polymerase II	7	2031	701	126412	0.93362
GO:0071281	biological_process	cellular response to iron ion	1	2031	168	126412	0.934316
GO:0009556	biological_process	microsporogenesis	1	2031	170	126412	0.936413
GO:0005778	cellular_component	peroxisomal membrane	1	2031	170	126412	0.936413
GO:0003674	molecular_function	molecular_function	216	2031	14766	126412	0.936464
GO:0004553	molecular_function	hydrolase activity, hydrolyzing O-glycosyl compounds	9	2031	866	126412	0.9374
GO:0043424	molecular_function	protein histidine kinase binding	1	2031	173	126412	0.939433
GO:0006413	biological_process	translational initiation	4	2031	462	126412	0.939552
GO:0031348	biological_process	negative regulation of defense response	1	2031	174	126412	0.940407
GO:0003743	molecular_function	translation initiation factor activity	4	2031	466	126412	0.94208
GO:0009788	biological_process	negative regulation of abscisic acid-activated signaling pathway	2	2031	284	126412	0.943519
GO:0031225	cellular_component	anchored component of membrane	5	2031	556	126412	0.944495
GO:0052689	molecular_function	carboxylic ester hydrolase activity	8	2031	803	126412	0.945075
GO:0022627	cellular_component	cytosolic small ribosomal subunit	4	2031	471	126412	0.945104
GO:0016787	molecular_function	hydrolase activity	24	2031	2003	126412	0.945442
GO:0007049	biological_process	cell cycle	6	2031	642	126412	0.945729
GO:0000156	molecular_function	phosphorelay response regulator activity	1	2031	182	126412	0.947659
GO:0009753	biological_process	response to jasmonic acid	4	2031	477	126412	0.948542
GO:0006486	biological_process	protein glycosylation	3	2031	389	126412	0.949825
GO:0010468	biological_process	regulation of gene expression	4	2031	480	126412	0.950186
GO:0004175	molecular_function	endopeptidase activity	1	2031	186	126412	0.950947
GO:0051607	biological_process	defense response to virus	1	2031	188	126412	0.952513
GO:0006886	biological_process	intracellular protein transport	7	2031	742	126412	0.953847
GO:0001666	biological_process	response to hypoxia	1	2031	190	126412	0.954029
GO:0001085	molecular_function	RNA polymerase II transcription factor binding	1	2031	191	126412	0.954769
GO:0004675	molecular_function	transmembrane receptor protein serine/threonine kinase activity	6	2031	668	126412	0.957603
GO:0009639	biological_process	response to red or far red light	6	2031	671	126412	0.95881
GO:0005768	cellular_component	endosome	14	2031	1308	126412	0.958888
GO:0006414	biological_process	translational elongation	1	2031	198	126412	0.959624
GO:0042744	biological_process	hydrogen peroxide catabolic process	2	2031	311	126412	0.960706
GO:0005215	molecular_function	transporter activity	9	2031	924	126412	0.961099
GO:0001228	molecular_function	DNA-binding transcription activator activity, RNA polymerase II-specific	3	2031	411	126412	0.96144
GO:0004842	molecular_function	ubiquitin-protein transferase activity	29	2031	2432	126412	0.962474
GO:0006970	biological_process	response to osmotic stress	6	2031	681	126412	0.96261
GO:0006979	biological_process	response to oxidative stress	12	2031	1168	126412	0.96306
GO:0009723	biological_process	response to ethylene	8	2031	858	126412	0.965925
GO:0008283	biological_process	cell population proliferation	1	2031	209	126412	0.966223
GO:0042393	molecular_function	histone binding	1	2031	211	126412	0.967302
GO:0009585	biological_process	red, far-red light phototransduction	6	2031	695	126412	0.967393
GO:0005654	cellular_component	nucleoplasm	8	2031	867	126412	0.968555
GO:0003904	molecular_function	deoxyribodipyrimidine photo-lyase activity	1	2031	215	126412	0.969356
GO:0004518	molecular_function	nuclease activity	2	2031	330	126412	0.96966
GO:0005743	cellular_component	mitochondrial inner membrane	2	2031	331	126412	0.970072
GO:0009617	biological_process	response to bacterium	7	2031	792	126412	0.970926
GO:0000145	cellular_component	exocyst	1	2031	219	126412	0.971282
GO:0009416	biological_process	response to light stimulus	8	2031	880	126412	0.97203
GO:0006904	biological_process	vesicle docking involved in exocytosis	1	2031	221	126412	0.972199
GO:0031347	biological_process	regulation of defense response	1	2031	221	126412	0.972199
GO:0006334	biological_process	nucleosome assembly	2	2031	341	126412	0.973908
GO:0005667	cellular_component	transcription factor complex	1	2031	225	126412	0.973946
GO:0007131	biological_process	reciprocal meiotic recombination	1	2031	226	126412	0.974365
GO:0009736	biological_process	cytokinin-activated signaling pathway	2	2031	350	126412	0.97695
GO:0006810	biological_process	transport	6	2031	734	126412	0.977911
GO:0008270	molecular_function	zinc ion binding	51	2031	4107	126412	0.978034
GO:0009791	biological_process	post-embryonic development	1	2031	236	126412	0.978205
GO:0005694	cellular_component	chromosome	5	2031	651	126412	0.979302
GO:0000719	biological_process	photoreactive repair	1	2031	240	126412	0.979575
GO:0003755	molecular_function	peptidyl-prolyl cis-trans isomerase activity	2	2031	360	126412	0.979928
GO:0009845	biological_process	seed germination	1	2031	245	126412	0.981167
GO:0005774	cellular_component	vacuolar membrane	26	2031	2333	126412	0.981385
GO:0008559	molecular_function	ATPase-coupled xenobiotic transmembrane transporter activity	1	2031	246	126412	0.98147
GO:0009793	biological_process	embryo development ending in seed dormancy	22	2031	2046	126412	0.982952
GO:0042742	biological_process	defense response to bacterium	13	2031	1347	126412	0.983088
GO:0010102	biological_process	lateral root morphogenesis	1	2031	252	126412	0.983189
GO:0009664	biological_process	plant-type cell wall organization	2	2031	373	126412	0.983246
GO:0009644	biological_process	response to high light intensity	5	2031	673	126412	0.983696
GO:0007140	biological_process	male meiotic nuclear division	1	2031	257	126412	0.984499
GO:0016607	cellular_component	nuclear speck	1	2031	258	126412	0.984749
GO:0005618	cellular_component	cell wall	35	2031	3032	126412	0.984823
GO:0006950	biological_process	response to stress	1	2031	262	126412	0.985708
GO:0004650	molecular_function	polygalacturonase activity	2	2031	386	126412	0.986028
GO:0015074	biological_process	DNA integration	5	2031	693	126412	0.986915
GO:0051726	biological_process	regulation of cell cycle	1	2031	272	126412	0.987849
GO:0009737	biological_process	response to abscisic acid	16	2031	1636	126412	0.988519
GO:0009408	biological_process	response to heat	12	2031	1313	126412	0.988549
GO:0019843	molecular_function	rRNA binding	1	2031	280	126412	0.989329
GO:0046686	biological_process	response to cadmium ion	19	2031	1887	126412	0.989684
GO:0016491	molecular_function	oxidoreductase activity	12	2031	1328	126412	0.989924
GO:0080008	cellular_component	Cul4-RING E3 ubiquitin ligase complex	2	2031	415	126412	0.99071
GO:0000287	molecular_function	magnesium ion binding	2	2031	421	126412	0.991467
GO:0004601	molecular_function	peroxidase activity	4	2031	641	126412	0.992168
GO:0061077	biological_process	chaperone-mediated protein folding	1	2031	300	126412	0.992287
GO:0006511	biological_process	ubiquitin-dependent protein catabolic process	10	2031	1194	126412	0.99259
GO:0016747	molecular_function	transferase activity, transferring acyl groups other than amino-acyl groups	2	2031	433	126412	0.992803
GO:0000139	cellular_component	Golgi membrane	9	2031	1118	126412	0.993302
GO:0006855	biological_process	drug transmembrane transport	1	2031	310	126412	0.993443
GO:0055114	biological_process	oxidation-reduction process	45	2031	3945	126412	0.994469
GO:0010228	biological_process	vegetative to reproductive phase transition of meristem	2	2031	454	126412	0.994666
GO:0009506	cellular_component	plasmodesma	51	2031	4391	126412	0.994697
GO:0007623	biological_process	circadian rhythm	1	2031	324	126412	0.994777
GO:0006887	biological_process	exocytosis	1	2031	326	126412	0.994943
GO:0009524	cellular_component	phragmoplast	3	2031	573	126412	0.99503
GO:0006284	biological_process	base-excision repair	3	2031	576	126412	0.995222
GO:0043621	molecular_function	protein self-association	1	2031	332	126412	0.995413
GO:0003676	molecular_function	nucleic acid binding	16	2031	1757	126412	0.995625
GO:0005634	cellular_component	nucleus	558	2031	38032	126412	0.995741
GO:0005681	cellular_component	spliceosomal complex	1	2031	342	126412	0.996101
GO:0009536	cellular_component	plastid	8	2031	1085	126412	0.996179
GO:0005737	cellular_component	cytoplasm	255	2031	18421	126412	0.99626
GO:0016042	biological_process	lipid catabolic process	5	2031	805	126412	0.996353
GO:0006278	biological_process	RNA-dependent DNA biosynthetic process	1	2031	352	126412	0.996685
GO:0015031	biological_process	protein transport	6	2031	913	126412	0.996755
GO:0009651	biological_process	response to salt stress	21	2031	2200	126412	0.996757
GO:0009867	biological_process	jasmonic acid mediated signaling pathway	3	2031	606	126412	0.996786
GO:0008168	molecular_function	methyltransferase activity	1	2031	357	126412	0.996944
GO:0006508	biological_process	proteolysis	15	2031	1726	126412	0.997179
GO:0009409	biological_process	response to cold	13	2031	1558	126412	0.997214
GO:0009706	cellular_component	chloroplast inner membrane	1	2031	363	126412	0.997228
GO:0009742	biological_process	brassinosteroid mediated signaling pathway	1	2031	364	126412	0.997272
GO:0003824	molecular_function	catalytic activity	9	2031	1213	126412	0.997384
GO:0009733	biological_process	response to auxin	8	2031	1129	126412	0.997583
GO:0009826	biological_process	unidimensional cell growth	2	2031	512	126412	0.997688
GO:0016740	molecular_function	transferase activity	8	2031	1139	126412	0.997825
GO:0004185	molecular_function	serine-type carboxypeptidase activity	1	2031	378	126412	0.997827
GO:0005730	cellular_component	nucleolus	12	2031	1506	126412	0.997974
GO:0009570	cellular_component	chloroplast stroma	23	2031	2423	126412	0.997993
GO:0005777	cellular_component	peroxisome	6	2031	958	126412	0.998052
GO:0004252	molecular_function	serine-type endopeptidase activity	5	2031	869	126412	0.998295
GO:0009507	cellular_component	chloroplast	167	2031	12778	126412	0.99844
GO:0009735	biological_process	response to cytokinin	4	2031	775	126412	0.998514
GO:0009505	cellular_component	plant-type cell wall	9	2031	1269	126412	0.998527
GO:0006260	biological_process	DNA replication	3	2031	674	126412	0.99871
GO:0000325	cellular_component	plant-type vacuole	1	2031	411	126412	0.998729
GO:0003924	molecular_function	GTPase activity	8	2031	1201	126412	0.99888
GO:0006412	biological_process	translation	10	2031	1397	126412	0.998983
GO:0030246	molecular_function	carbohydrate binding	3	2031	692	126412	0.99899
GO:0005794	cellular_component	Golgi apparatus	56	2031	5058	126412	0.999009
GO:0005773	cellular_component	vacuole	22	2031	2495	126412	0.999409
GO:0005789	cellular_component	endoplasmic reticulum membrane	11	2031	1576	126412	0.999583
GO:0006470	biological_process	protein dephosphorylation	1	2031	503	126412	0.999715
GO:0005509	molecular_function	calcium ion binding	8	2031	1341	126412	0.999764
GO:0009734	biological_process	auxin-activated signaling pathway	4	2031	919	126412	0.999771
GO:0006310	biological_process	DNA recombination	4	2031	929	126412	0.9998
GO:0043161	biological_process	proteasome-mediated ubiquitin-dependent protein catabolic process	6	2031	1159	126412	0.999821
GO:0007275	biological_process	multicellular organism development	12	2031	1792	126412	0.999883
GO:0009941	cellular_component	chloroplast envelope	14	2031	2046	126412	0.999942
GO:0005739	cellular_component	mitochondrion	109	2031	9494	126412	0.999954
GO:0019005	cellular_component	SCF ubiquitin ligase complex	6	2031	1306	126412	0.999971
GO:0008757	molecular_function	S-adenosylmethionine-dependent methyltransferase activity	1	2031	673	126412	0.999982
GO:0004722	molecular_function	protein serine/threonine phosphatase activity	1	2031	701	126412	0.999989
GO:0048046	cellular_component	apoplast	9	2031	1728	126412	0.999991
GO:0000977	molecular_function	RNA polymerase II regulatory region sequence-specific DNA binding	6	2031	1476	126412	0.999997
GO:0005829	cellular_component	cytosol	117	2031	10664	126412	0.999998
GO:0005975	biological_process	carbohydrate metabolic process	2	2031	997	126412	0.999998
GO:0009414	biological_process	response to water deprivation	5	2031	1452	126412	0.999999
GO:0016567	biological_process	protein ubiquitination	11	2031	2225	126412	1
GO:0031146	biological_process	SCF-dependent proteasomal ubiquitin-dependent protein catabolic process	1	2031	963	126412	1
GO:0046872	molecular_function	metal ion binding	54	2031	6173	126412	1
GO:0016709	molecular_function	oxidoreductase activity, acting on paired donors, with incorporation or reduction of molecular oxygen, NAD(P)H as one donor, and incorporation of one atom of oxygen	1	2031	1153	126412	1
GO:0003735	molecular_function	structural constituent of ribosome	5	2031	1845	126412	1
GO:0044550	biological_process	secondary metabolite biosynthetic process	1	2031	1205	126412	1
GO:0016020	cellular_component	membrane	50	2031	6531	126412	1
