# Supplementary material for: Integrated agronomic, physiological, microstructure, and whole-transcriptome analyses reveal the role of biomass accumulation and quality formation during Se biofortification in alfalfa
Source: Front Plant Sci. 2023 Jul 20;14:1198847. doi: 10.3389/fpls.2023.1198847 (PMC10400095; doi:10.3389/fpls.2023.1198847)
Supplement: Supplementary Table S8 — KEGG enrichment scatterplot of miRNAs target genes. [file Table_8.xlsx]

## Sheet: KEGG_significant
Pathway Id	pathway description	S gene number	TS gene number	B gene number	TB gene number	Pvalue of Fisher's Exact Test
ko04626	Plant-pathogen interaction	84	736	2910	49751	4.66085e-09
ko00410	beta-Alanine metabolism	16	736	297	49751	1.12261e-05
ko03022	Basal transcription factors	20	736	439	49751	1.14823e-05
ko00500	Starch and sucrose metabolism	53	736	1977	49751	2.86738e-05
ko00760	Nicotinate and nicotinamide metabolism	10	736	200	49751	0.00086087
ko00270	Cysteine and methionine metabolism	29	736	1054	49751	0.00122726
ko02010	ABC transporters	25	736	901	49751	0.00231213
ko00310	Lysine degradation	14	736	408	49751	0.00339971
ko00910	Nitrogen metabolism	9	736	212	49751	0.00458275
ko00903	Limonene and pinene degradation	4	736	49	49751	0.00594328
ko00071	Fatty acid degradation	11	736	346	49751	0.0149104
ko00073	Cutin, suberine and wax biosynthesis	11	736	348	49751	0.0154952
ko00650	Butanoate metabolism	6	736	143	49751	0.0200217
ko00740	Riboflavin metabolism	6	736	144	49751	0.0206401
ko00960	Tropane, piperidine and pyridine alkaloid biosynthesis	8	736	232	49751	0.0229693
ko00380	Tryptophan metabolism	16	736	633	49751	0.0281359
ko00620	Pyruvate metabolism	15	736	583	49751	0.028705
ko03430	Mismatch repair	39	736	1982	49751	0.0451691
ko03040	Spliceosome	44	736	2288	49751	0.0476751
ko00430	Taurine and hypotaurine metabolism	4	736	92	49751	0.0479476
ko00630	Glyoxylate and dicarboxylate metabolism	13	736	524	49751	0.0503172
ko03030	DNA replication	39	736	2060	49751	0.0712522
ko00240	Pyrimidine metabolism	26	736	1307	49751	0.0806473
ko04016	MAPK signaling pathway - plant	33	736	1772	49751	0.106567
ko00440	Phosphonate and phosphinate metabolism	3	736	79	49751	0.11233
ko00970	Aminoacyl-tRNA biosynthesis	16	736	771	49751	0.112498
ko00966	Glucosinolate biosynthesis	6	736	223	49751	0.11501
ko00950	Isoquinoline alkaloid biosynthesis	10	736	440	49751	0.12085
ko00061	Fatty acid biosynthesis	7	736	285	49751	0.132264
ko00100	Steroid biosynthesis	5	736	192	49751	0.156931
ko04144	Endocytosis	32	736	1793	49751	0.160356
ko03410	Base excision repair	8	736	360	49751	0.167337
ko00340	Histidine metabolism	4	736	146	49751	0.171351
ko00280	Valine, leucine and isoleucine degradation	8	736	369	49751	0.183347
ko03050	Proteasome	10	736	500	49751	0.209645
ko00730	Thiamine metabolism	3	736	111	49751	0.226762
ko00020	Citrate cycle (TCA cycle)	7	736	336	49751	0.231902
ko03420	Nucleotide excision repair	36	736	2153	49751	0.247904
ko00770	Pantothenate and CoA biosynthesis	6	736	287	49751	0.253065
ko03440	Homologous recombination	40	736	2424	49751	0.260055
ko00330	Arginine and proline metabolism	8	736	409	49751	0.261472
ko00750	Vitamin B6 metabolism	3	736	127	49751	0.290262
ko00040	Pentose and glucuronate interconversions	23	736	1384	49751	0.313997
ko00640	Propanoate metabolism	4	736	200	49751	0.343425
ko00350	Tyrosine metabolism	10	736	593	49751	0.382246
ko00670	One carbon pool by folate	3	736	150	49751	0.382907
ko04146	Peroxisome	11	736	685	49751	0.433903
ko04075	Plant hormone signal transduction	43	736	2833	49751	0.453334
ko00460	Cyanoamino acid metabolism	12	736	772	49751	0.471574
ko00250	Alanine, aspartate and glutamate metabolism	5	736	315	49751	0.499273
ko00901	Indole alkaloid biosynthesis	8	736	520	49751	0.504651
ko00562	Inositol phosphate metabolism	9	736	593	49751	0.515431
ko00400	Phenylalanine, tyrosine and tryptophan biosynthesis	4	736	262	49751	0.543701
ko04136	Autophagy - other eukaryotes	4	736	269	49751	0.564466
ko04070	Phosphatidylinositol signaling system	9	736	624	49751	0.57657
ko04120	Ubiquitin mediated proteolysis	28	736	1958	49751	0.600025
ko00130	Ubiquinone and other terpenoid-quinone biosynthesis	5	736	354	49751	0.602327
ko00360	Phenylalanine metabolism	10	736	725	49751	0.631867
ko00943	Isoflavonoid biosynthesis	4	736	305	49751	0.662409
ko00230	Purine metabolism	20	736	1502	49751	0.715152
ko03060	Protein export	4	736	328	49751	0.71659
ko00561	Glycerolipid metabolism	9	736	706	49751	0.718581
ko00195	Photosynthesis	3	736	262	49751	0.746093
ko04933	AGE-RAGE signaling pathway in diabetic complications	3	736	264	49751	0.750678
ko00260	Glycine, serine and threonine metabolism	7	736	594	49751	0.776823
ko00565	Ether lipid metabolism	3	736	292	49751	0.808094
ko00510	N-Glycan biosynthesis	3	736	308	49751	0.835603
ko00053	Ascorbate and aldarate metabolism	6	736	560	49751	0.836977
ko03013	RNA transport	26	736	2151	49751	0.878051
ko00514	Other types of O-glycan biosynthesis	1	736	191	49751	0.942282
ko03020	RNA polymerase	6	736	698	49751	0.946731
ko00511	Other glycan degradation	3	736	419	49751	0.948219
ko00790	Folate biosynthesis	1	736	216	49751	0.960297
ko04141	Protein processing in endoplasmic reticulum	29	736	2645	49751	0.965471
ko00941	Flavonoid biosynthesis	6	736	754	49751	0.967677
ko00965	Betalain biosynthesis	2	736	357	49751	0.969309
ko00710	Carbon fixation in photosynthetic organisms	3	736	473	49751	0.971652
ko00940	Phenylpropanoid biosynthesis	18	736	1812	49751	0.973334
ko00909	Sesquiterpenoid and triterpenoid biosynthesis	1	736	251	49751	0.976493
ko00052	Galactose metabolism	6	736	812	49751	0.981175
ko00220	Arginine biosynthesis	1	736	279	49751	0.984548
ko00904	Diterpenoid biosynthesis	1	736	298	49751	0.988378
ko04145	Phagosome	4	736	675	49751	0.990297
ko03018	RNA degradation	8	736	1107	49751	0.992848
ko00564	Glycerophospholipid metabolism	3	736	645	49751	0.996309
ko00860	Porphyrin and chlorophyll metabolism	1	736	382	49751	0.996705
ko00010	Glycolysis / Gluconeogenesis	5	736	898	49751	0.997279
ko00906	Carotenoid biosynthesis	1	736	415	49751	0.997993
ko03015	mRNA surveillance pathway	5	736	945	49751	0.998386
ko00600	Sphingolipid metabolism	3	736	729	49751	0.998701
ko00480	Glutathione metabolism	5	736	983	49751	0.998949
ko00190	Oxidative phosphorylation	4	736	935	49751	0.999532
ko03008	Ribosome biogenesis in eukaryotes	2	736	836	49751	0.999952
ko03010	Ribosome	10	736	1844	49751	0.999966
ko00520	Amino sugar and nucleotide sugar metabolism	4	736	1168	49751	0.999975
