# Supplementary material for: Integrated agronomic, physiological, microstructure, and whole-transcriptome analyses reveal the role of biomass accumulation and quality formation during Se biofortification in alfalfa
Source: Front Plant Sci. 2023 Jul 20;14:1198847. doi: 10.3389/fpls.2023.1198847 (PMC10400095; doi:10.3389/fpls.2023.1198847)
Supplement: Supplementary Table S9 — Predicted ceRNA regulated target genes in alfalfa under Se biofortification. [file Table_9.xlsx]

## Sheet: Sheet1
RNA_class	RNA	miRNA	mRNA
lncRNA	MS.gene72302:MSTRG.24471.1	PC-3p-42756_120	MS.gene52794
lncRNA	.:MSTRG.14664.1	PC-3p-42756_120	MS.gene52794
lncRNA	MS.gene90766:MSTRG.141332.1	PC-3p-42756_120	MS.gene52794
lncRNA	.:MSTRG.133428.1	PC-3p-42756_120	MS.gene52794
circRNA	circRNA286	PC-3p-42756_120	MS.gene52794
circRNA	circRNA289	PC-3p-42756_120	MS.gene52794
circRNA	circRNA38	PC-3p-42756_120	MS.gene52794
lncRNA	MS.gene72302:MSTRG.24471.1	PC-3p-42756_120	MS.gene064810
lncRNA	.:MSTRG.14664.1	PC-3p-42756_120	MS.gene064810
lncRNA	MS.gene90766:MSTRG.141332.1	PC-3p-42756_120	MS.gene064810
lncRNA	.:MSTRG.133428.1	PC-3p-42756_120	MS.gene064810
circRNA	circRNA286	PC-3p-42756_120	MS.gene064810
circRNA	circRNA289	PC-3p-42756_120	MS.gene064810
circRNA	circRNA38	PC-3p-42756_120	MS.gene064810
lncRNA	.:MSTRG.5314.1	PC-3p-60657_85	MS.gene018732
lncRNA	.:MSTRG.138863.1	PC-3p-60657_85	MS.gene018732
lncRNA	.:MSTRG.54725.1	PC-3p-60657_85	MS.gene018732
lncRNA	MS.gene040819:MSTRG.12432.1	PC-3p-60657_85	MS.gene018732
lncRNA	.:MSTRG.138556.1	PC-3p-60657_85	MS.gene018732
lncRNA	.:MSTRG.13772.28	PC-3p-60657_85	MS.gene018732
lncRNA	.:MSTRG.13772.8	PC-3p-60657_85	MS.gene018732
lncRNA	.:MSTRG.143676.1	PC-3p-60657_85	MS.gene018732
lncRNA	MS.gene97811:MSTRG.61679.1	PC-3p-60657_85	MS.gene018732
lncRNA	.:MSTRG.24718.1	PC-3p-60657_85	MS.gene018732
lncRNA	MS.gene33175:MSTRG.6321.1	PC-3p-60657_85	MS.gene018732
lncRNA	.:MSTRG.23171.1	PC-3p-60657_85	MS.gene018732
lncRNA	.:MSTRG.33200.1	PC-3p-60657_85	MS.gene018732
lncRNA	.:MSTRG.117982.1	PC-3p-60657_85	MS.gene018732
lncRNA	.:MSTRG.85535.1	PC-3p-60657_85	MS.gene018732
lncRNA	MS.gene039687:MSTRG.55803.1	PC-3p-60657_85	MS.gene018732
lncRNA	.:MSTRG.117981.1	PC-3p-60657_85	MS.gene018732
lncRNA	.:MSTRG.95503.1	PC-3p-60657_85	MS.gene018732
lncRNA	.:MSTRG.152480.1	PC-3p-60657_85	MS.gene018732
lncRNA	MS.gene71909:MSTRG.150362.1	PC-3p-60657_85	MS.gene018732
lncRNA	.:MSTRG.146952.1	PC-3p-60657_85	MS.gene018732
lncRNA	.:MSTRG.13772.4	PC-3p-60657_85	MS.gene018732
lncRNA	.:MSTRG.3096.1	PC-3p-60657_85	MS.gene018732
lncRNA	MS.gene072450:MSTRG.129104.1	PC-3p-60657_85	MS.gene018732
lncRNA	.:MSTRG.29021.1	PC-3p-60657_85	MS.gene018732
circRNA	ciRNA120	PC-3p-60657_85	MS.gene018732
circRNA	circRNA164	PC-3p-60657_85	MS.gene018732
circRNA	circRNA200	PC-3p-60657_85	MS.gene018732
circRNA	circRNA281	PC-3p-60657_85	MS.gene018732
circRNA	circRNA289	PC-3p-60657_85	MS.gene018732
circRNA	circRNA294	PC-3p-60657_85	MS.gene018732
circRNA	circRNA32	PC-3p-60657_85	MS.gene018732
circRNA	circRNA42	PC-3p-60657_85	MS.gene018732
circRNA	circRNA44	PC-3p-60657_85	MS.gene018732
circRNA	circRNA47	PC-3p-60657_85	MS.gene018732
circRNA	circRNA49	PC-3p-60657_85	MS.gene018732
lncRNA	.:MSTRG.5314.1	PC-3p-60657_85	MS.gene97026
lncRNA	.:MSTRG.138863.1	PC-3p-60657_85	MS.gene97026
lncRNA	.:MSTRG.54725.1	PC-3p-60657_85	MS.gene97026
lncRNA	MS.gene040819:MSTRG.12432.1	PC-3p-60657_85	MS.gene97026
lncRNA	.:MSTRG.138556.1	PC-3p-60657_85	MS.gene97026
lncRNA	.:MSTRG.13772.28	PC-3p-60657_85	MS.gene97026
lncRNA	.:MSTRG.13772.8	PC-3p-60657_85	MS.gene97026
lncRNA	.:MSTRG.143676.1	PC-3p-60657_85	MS.gene97026
lncRNA	MS.gene97811:MSTRG.61679.1	PC-3p-60657_85	MS.gene97026
lncRNA	.:MSTRG.24718.1	PC-3p-60657_85	MS.gene97026
lncRNA	MS.gene33175:MSTRG.6321.1	PC-3p-60657_85	MS.gene97026
lncRNA	.:MSTRG.23171.1	PC-3p-60657_85	MS.gene97026
lncRNA	.:MSTRG.33200.1	PC-3p-60657_85	MS.gene97026
lncRNA	.:MSTRG.117982.1	PC-3p-60657_85	MS.gene97026
lncRNA	.:MSTRG.85535.1	PC-3p-60657_85	MS.gene97026
lncRNA	MS.gene039687:MSTRG.55803.1	PC-3p-60657_85	MS.gene97026
lncRNA	.:MSTRG.117981.1	PC-3p-60657_85	MS.gene97026
lncRNA	.:MSTRG.95503.1	PC-3p-60657_85	MS.gene97026
lncRNA	.:MSTRG.152480.1	PC-3p-60657_85	MS.gene97026
lncRNA	MS.gene71909:MSTRG.150362.1	PC-3p-60657_85	MS.gene97026
lncRNA	.:MSTRG.146952.1	PC-3p-60657_85	MS.gene97026
lncRNA	.:MSTRG.13772.4	PC-3p-60657_85	MS.gene97026
lncRNA	.:MSTRG.3096.1	PC-3p-60657_85	MS.gene97026
lncRNA	MS.gene072450:MSTRG.129104.1	PC-3p-60657_85	MS.gene97026
lncRNA	.:MSTRG.29021.1	PC-3p-60657_85	MS.gene97026
circRNA	ciRNA120	PC-3p-60657_85	MS.gene97026
circRNA	circRNA164	PC-3p-60657_85	MS.gene97026
circRNA	circRNA200	PC-3p-60657_85	MS.gene97026
circRNA	circRNA281	PC-3p-60657_85	MS.gene97026
circRNA	circRNA289	PC-3p-60657_85	MS.gene97026
circRNA	circRNA294	PC-3p-60657_85	MS.gene97026
circRNA	circRNA32	PC-3p-60657_85	MS.gene97026
circRNA	circRNA42	PC-3p-60657_85	MS.gene97026
circRNA	circRNA44	PC-3p-60657_85	MS.gene97026
circRNA	circRNA47	PC-3p-60657_85	MS.gene97026
circRNA	circRNA49	PC-3p-60657_85	MS.gene97026
lncRNA	.:MSTRG.5314.1	PC-3p-60657_85	MS.gene55778
lncRNA	.:MSTRG.138863.1	PC-3p-60657_85	MS.gene55778
lncRNA	.:MSTRG.54725.1	PC-3p-60657_85	MS.gene55778
lncRNA	MS.gene040819:MSTRG.12432.1	PC-3p-60657_85	MS.gene55778
lncRNA	.:MSTRG.138556.1	PC-3p-60657_85	MS.gene55778
lncRNA	.:MSTRG.13772.28	PC-3p-60657_85	MS.gene55778
lncRNA	.:MSTRG.13772.8	PC-3p-60657_85	MS.gene55778
lncRNA	.:MSTRG.143676.1	PC-3p-60657_85	MS.gene55778
lncRNA	MS.gene97811:MSTRG.61679.1	PC-3p-60657_85	MS.gene55778
lncRNA	.:MSTRG.24718.1	PC-3p-60657_85	MS.gene55778
lncRNA	MS.gene33175:MSTRG.6321.1	PC-3p-60657_85	MS.gene55778
lncRNA	.:MSTRG.23171.1	PC-3p-60657_85	MS.gene55778
lncRNA	.:MSTRG.33200.1	PC-3p-60657_85	MS.gene55778
lncRNA	.:MSTRG.117982.1	PC-3p-60657_85	MS.gene55778
lncRNA	.:MSTRG.85535.1	PC-3p-60657_85	MS.gene55778
lncRNA	MS.gene039687:MSTRG.55803.1	PC-3p-60657_85	MS.gene55778
lncRNA	.:MSTRG.117981.1	PC-3p-60657_85	MS.gene55778
lncRNA	.:MSTRG.95503.1	PC-3p-60657_85	MS.gene55778
lncRNA	.:MSTRG.152480.1	PC-3p-60657_85	MS.gene55778
lncRNA	MS.gene71909:MSTRG.150362.1	PC-3p-60657_85	MS.gene55778
lncRNA	.:MSTRG.146952.1	PC-3p-60657_85	MS.gene55778
lncRNA	.:MSTRG.13772.4	PC-3p-60657_85	MS.gene55778
lncRNA	.:MSTRG.3096.1	PC-3p-60657_85	MS.gene55778
lncRNA	MS.gene072450:MSTRG.129104.1	PC-3p-60657_85	MS.gene55778
lncRNA	.:MSTRG.29021.1	PC-3p-60657_85	MS.gene55778
circRNA	ciRNA120	PC-3p-60657_85	MS.gene55778
circRNA	circRNA164	PC-3p-60657_85	MS.gene55778
circRNA	circRNA200	PC-3p-60657_85	MS.gene55778
circRNA	circRNA281	PC-3p-60657_85	MS.gene55778
circRNA	circRNA289	PC-3p-60657_85	MS.gene55778
circRNA	circRNA294	PC-3p-60657_85	MS.gene55778
circRNA	circRNA32	PC-3p-60657_85	MS.gene55778
circRNA	circRNA42	PC-3p-60657_85	MS.gene55778
circRNA	circRNA44	PC-3p-60657_85	MS.gene55778
circRNA	circRNA47	PC-3p-60657_85	MS.gene55778
circRNA	circRNA49	PC-3p-60657_85	MS.gene55778
lncRNA	.:MSTRG.156777.1	PC-5p-163495_24	MS.gene013113
lncRNA	.:MSTRG.92821.1	PC-5p-163495_24	MS.gene013113
circRNA	circRNA119	PC-5p-163495_24	MS.gene013113
circRNA	circRNA199	PC-5p-163495_24	MS.gene013113
circRNA	circRNA221	PC-5p-163495_24	MS.gene013113
lncRNA	.:MSTRG.156777.1	PC-5p-163495_24	MS.gene020463
lncRNA	.:MSTRG.92821.1	PC-5p-163495_24	MS.gene020463
circRNA	circRNA119	PC-5p-163495_24	MS.gene020463
circRNA	circRNA199	PC-5p-163495_24	MS.gene020463
circRNA	circRNA221	PC-5p-163495_24	MS.gene020463
lncRNA	.:MSTRG.156777.1	PC-5p-163495_24	MS.gene38616
lncRNA	.:MSTRG.92821.1	PC-5p-163495_24	MS.gene38616
circRNA	circRNA119	PC-5p-163495_24	MS.gene38616
circRNA	circRNA199	PC-5p-163495_24	MS.gene38616
circRNA	circRNA221	PC-5p-163495_24	MS.gene38616
lncRNA	MS.gene79702:MSTRG.157720.2	gma-miR171c-3p	MS.gene48898
circRNA	circRNA20	gma-miR171c-3p	MS.gene48898
circRNA	circRNA26	gma-miR171c-3p	MS.gene48898
lncRNA	.:MSTRG.29689.1	gma-miR172h-5p_R-1	MS.gene064732
circRNA	circRNA129	gma-miR172h-5p_R-1	MS.gene064732
circRNA	circRNA269	gma-miR172h-5p_R-1	MS.gene064732
circRNA	circRNA27	gma-miR172h-5p_R-1	MS.gene064732
circRNA	circRNA280	gma-miR172h-5p_R-1	MS.gene064732
circRNA	circRNA317	gma-miR172h-5p_R-1	MS.gene064732
circRNA	circRNA49	gma-miR172h-5p_R-1	MS.gene064732
circRNA	circRNA82	gma-miR172h-5p_R-1	MS.gene064732
lncRNA	.:MSTRG.56676.1	gma-miR9749_L+1R-1	MS.gene33113
lncRNA	.:MSTRG.42121.1	gma-miR9749_L+1R-1	MS.gene33113
lncRNA	.:MSTRG.153256.1	gma-miR9749_L+1R-1	MS.gene33113
lncRNA	.:MSTRG.108357.1	gma-miR9749_L+1R-1	MS.gene33113
circRNA	circRNA297	gma-miR9749_L+1R-1	MS.gene33113
circRNA	circRNA31	gma-miR9749_L+1R-1	MS.gene33113
circRNA	circRNA47	gma-miR9749_L+1R-1	MS.gene33113
lncRNA	.:MSTRG.56676.1	gma-miR9749_L+1R-1	MS.gene48610
lncRNA	.:MSTRG.42121.1	gma-miR9749_L+1R-1	MS.gene48610
lncRNA	.:MSTRG.153256.1	gma-miR9749_L+1R-1	MS.gene48610
lncRNA	.:MSTRG.108357.1	gma-miR9749_L+1R-1	MS.gene48610
circRNA	circRNA297	gma-miR9749_L+1R-1	MS.gene48610
circRNA	circRNA31	gma-miR9749_L+1R-1	MS.gene48610
circRNA	circRNA47	gma-miR9749_L+1R-1	MS.gene48610
lncRNA	.:MSTRG.100041.2	gra-MIR8782-p3_2ss13TC17CT	MS.gene63002
lncRNA	MS.gene94703:MSTRG.131549.1	gra-MIR8782-p3_2ss13TC17CT	MS.gene63002
lncRNA	MS.gene029025:MSTRG.36622.1	gra-MIR8782-p3_2ss13TC17CT	MS.gene63002
lncRNA	MS.gene45098:MSTRG.98746.3	gra-MIR8782-p3_2ss13TC17CT	MS.gene63002
lncRNA	.:MSTRG.110357.3	gra-MIR8782-p3_2ss13TC17CT	MS.gene63002
lncRNA	.:MSTRG.138863.1	gra-MIR8782-p3_2ss13TC17CT	MS.gene63002
lncRNA	MS.gene064969:MSTRG.23786.1	gra-MIR8782-p3_2ss13TC17CT	MS.gene63002
lncRNA	MS.gene48985:MSTRG.81702.1	gra-MIR8782-p3_2ss13TC17CT	MS.gene63002
lncRNA	.:MSTRG.21804.1	gra-MIR8782-p3_2ss13TC17CT	MS.gene63002
lncRNA	.:MSTRG.46149.1	gra-MIR8782-p3_2ss13TC17CT	MS.gene63002
lncRNA	.:MSTRG.54254.1	gra-MIR8782-p3_2ss13TC17CT	MS.gene63002
lncRNA	MS.gene81928:MSTRG.76606.1	gra-MIR8782-p3_2ss13TC17CT	MS.gene63002
lncRNA	MS.gene71296:MSTRG.53522.1	gra-MIR8782-p3_2ss13TC17CT	MS.gene63002
lncRNA	.:MSTRG.138099.1	gra-MIR8782-p3_2ss13TC17CT	MS.gene63002
lncRNA	.:MSTRG.132904.1	gra-MIR8782-p3_2ss13TC17CT	MS.gene63002
lncRNA	.:MSTRG.29161.1	gra-MIR8782-p3_2ss13TC17CT	MS.gene63002
lncRNA	.:MSTRG.116844.1	gra-MIR8782-p3_2ss13TC17CT	MS.gene63002
lncRNA	.:MSTRG.157696.1	gra-MIR8782-p3_2ss13TC17CT	MS.gene63002
lncRNA	MS.gene96017:MSTRG.41739.1	gra-MIR8782-p3_2ss13TC17CT	MS.gene63002
lncRNA	.:MSTRG.57233.1	gra-MIR8782-p3_2ss13TC17CT	MS.gene63002
lncRNA	MS.gene81487:MSTRG.117331.1	gra-MIR8782-p3_2ss13TC17CT	MS.gene63002
lncRNA	.:MSTRG.12057.1	gra-MIR8782-p3_2ss13TC17CT	MS.gene63002
lncRNA	.:MSTRG.127312.1	gra-MIR8782-p3_2ss13TC17CT	MS.gene63002
lncRNA	.:MSTRG.48818.2	gra-MIR8782-p3_2ss13TC17CT	MS.gene63002
lncRNA	MS.gene85472:MSTRG.125814.1	gra-MIR8782-p3_2ss13TC17CT	MS.gene63002
circRNA	ciRNA36	gra-MIR8782-p3_2ss13TC17CT	MS.gene63002
circRNA	circRNA120	gra-MIR8782-p3_2ss13TC17CT	MS.gene63002
circRNA	circRNA122	gra-MIR8782-p3_2ss13TC17CT	MS.gene63002
circRNA	circRNA130	gra-MIR8782-p3_2ss13TC17CT	MS.gene63002
circRNA	circRNA171	gra-MIR8782-p3_2ss13TC17CT	MS.gene63002
circRNA	circRNA193	gra-MIR8782-p3_2ss13TC17CT	MS.gene63002
circRNA	circRNA210	gra-MIR8782-p3_2ss13TC17CT	MS.gene63002
circRNA	circRNA247	gra-MIR8782-p3_2ss13TC17CT	MS.gene63002
circRNA	circRNA297	gra-MIR8782-p3_2ss13TC17CT	MS.gene63002
circRNA	circRNA303	gra-MIR8782-p3_2ss13TC17CT	MS.gene63002
circRNA	circRNA32	gra-MIR8782-p3_2ss13TC17CT	MS.gene63002
lncRNA	.:MSTRG.100041.2	gra-MIR8782-p3_2ss13TC17CT	MS.gene90490
lncRNA	MS.gene94703:MSTRG.131549.1	gra-MIR8782-p3_2ss13TC17CT	MS.gene90490
lncRNA	MS.gene029025:MSTRG.36622.1	gra-MIR8782-p3_2ss13TC17CT	MS.gene90490
lncRNA	MS.gene45098:MSTRG.98746.3	gra-MIR8782-p3_2ss13TC17CT	MS.gene90490
lncRNA	.:MSTRG.110357.3	gra-MIR8782-p3_2ss13TC17CT	MS.gene90490
lncRNA	.:MSTRG.138863.1	gra-MIR8782-p3_2ss13TC17CT	MS.gene90490
lncRNA	MS.gene064969:MSTRG.23786.1	gra-MIR8782-p3_2ss13TC17CT	MS.gene90490
lncRNA	MS.gene48985:MSTRG.81702.1	gra-MIR8782-p3_2ss13TC17CT	MS.gene90490
lncRNA	.:MSTRG.21804.1	gra-MIR8782-p3_2ss13TC17CT	MS.gene90490
lncRNA	.:MSTRG.46149.1	gra-MIR8782-p3_2ss13TC17CT	MS.gene90490
lncRNA	.:MSTRG.54254.1	gra-MIR8782-p3_2ss13TC17CT	MS.gene90490
lncRNA	MS.gene81928:MSTRG.76606.1	gra-MIR8782-p3_2ss13TC17CT	MS.gene90490
lncRNA	MS.gene71296:MSTRG.53522.1	gra-MIR8782-p3_2ss13TC17CT	MS.gene90490
lncRNA	.:MSTRG.138099.1	gra-MIR8782-p3_2ss13TC17CT	MS.gene90490
lncRNA	.:MSTRG.132904.1	gra-MIR8782-p3_2ss13TC17CT	MS.gene90490
lncRNA	.:MSTRG.29161.1	gra-MIR8782-p3_2ss13TC17CT	MS.gene90490
lncRNA	.:MSTRG.116844.1	gra-MIR8782-p3_2ss13TC17CT	MS.gene90490
lncRNA	.:MSTRG.157696.1	gra-MIR8782-p3_2ss13TC17CT	MS.gene90490
lncRNA	MS.gene96017:MSTRG.41739.1	gra-MIR8782-p3_2ss13TC17CT	MS.gene90490
lncRNA	.:MSTRG.57233.1	gra-MIR8782-p3_2ss13TC17CT	MS.gene90490
lncRNA	MS.gene81487:MSTRG.117331.1	gra-MIR8782-p3_2ss13TC17CT	MS.gene90490
lncRNA	.:MSTRG.12057.1	gra-MIR8782-p3_2ss13TC17CT	MS.gene90490
lncRNA	.:MSTRG.127312.1	gra-MIR8782-p3_2ss13TC17CT	MS.gene90490
lncRNA	.:MSTRG.48818.2	gra-MIR8782-p3_2ss13TC17CT	MS.gene90490
lncRNA	MS.gene85472:MSTRG.125814.1	gra-MIR8782-p3_2ss13TC17CT	MS.gene90490
circRNA	ciRNA36	gra-MIR8782-p3_2ss13TC17CT	MS.gene90490
circRNA	circRNA120	gra-MIR8782-p3_2ss13TC17CT	MS.gene90490
circRNA	circRNA122	gra-MIR8782-p3_2ss13TC17CT	MS.gene90490
circRNA	circRNA130	gra-MIR8782-p3_2ss13TC17CT	MS.gene90490
circRNA	circRNA171	gra-MIR8782-p3_2ss13TC17CT	MS.gene90490
circRNA	circRNA193	gra-MIR8782-p3_2ss13TC17CT	MS.gene90490
circRNA	circRNA210	gra-MIR8782-p3_2ss13TC17CT	MS.gene90490
circRNA	circRNA247	gra-MIR8782-p3_2ss13TC17CT	MS.gene90490
circRNA	circRNA297	gra-MIR8782-p3_2ss13TC17CT	MS.gene90490
circRNA	circRNA303	gra-MIR8782-p3_2ss13TC17CT	MS.gene90490
circRNA	circRNA32	gra-MIR8782-p3_2ss13TC17CT	MS.gene90490
lncRNA	.:MSTRG.100041.2	gra-MIR8782-p3_2ss13TC17CT	MS.gene05122
lncRNA	MS.gene94703:MSTRG.131549.1	gra-MIR8782-p3_2ss13TC17CT	MS.gene05122
lncRNA	MS.gene029025:MSTRG.36622.1	gra-MIR8782-p3_2ss13TC17CT	MS.gene05122
lncRNA	MS.gene45098:MSTRG.98746.3	gra-MIR8782-p3_2ss13TC17CT	MS.gene05122
lncRNA	.:MSTRG.110357.3	gra-MIR8782-p3_2ss13TC17CT	MS.gene05122
lncRNA	.:MSTRG.138863.1	gra-MIR8782-p3_2ss13TC17CT	MS.gene05122
lncRNA	MS.gene064969:MSTRG.23786.1	gra-MIR8782-p3_2ss13TC17CT	MS.gene05122
lncRNA	MS.gene48985:MSTRG.81702.1	gra-MIR8782-p3_2ss13TC17CT	MS.gene05122
lncRNA	.:MSTRG.21804.1	gra-MIR8782-p3_2ss13TC17CT	MS.gene05122
lncRNA	.:MSTRG.46149.1	gra-MIR8782-p3_2ss13TC17CT	MS.gene05122
lncRNA	.:MSTRG.54254.1	gra-MIR8782-p3_2ss13TC17CT	MS.gene05122
lncRNA	MS.gene81928:MSTRG.76606.1	gra-MIR8782-p3_2ss13TC17CT	MS.gene05122
lncRNA	MS.gene71296:MSTRG.53522.1	gra-MIR8782-p3_2ss13TC17CT	MS.gene05122
lncRNA	.:MSTRG.138099.1	gra-MIR8782-p3_2ss13TC17CT	MS.gene05122
lncRNA	.:MSTRG.132904.1	gra-MIR8782-p3_2ss13TC17CT	MS.gene05122
lncRNA	.:MSTRG.29161.1	gra-MIR8782-p3_2ss13TC17CT	MS.gene05122
lncRNA	.:MSTRG.116844.1	gra-MIR8782-p3_2ss13TC17CT	MS.gene05122
lncRNA	.:MSTRG.157696.1	gra-MIR8782-p3_2ss13TC17CT	MS.gene05122
lncRNA	MS.gene96017:MSTRG.41739.1	gra-MIR8782-p3_2ss13TC17CT	MS.gene05122
lncRNA	.:MSTRG.57233.1	gra-MIR8782-p3_2ss13TC17CT	MS.gene05122
lncRNA	MS.gene81487:MSTRG.117331.1	gra-MIR8782-p3_2ss13TC17CT	MS.gene05122
lncRNA	.:MSTRG.12057.1	gra-MIR8782-p3_2ss13TC17CT	MS.gene05122
lncRNA	.:MSTRG.127312.1	gra-MIR8782-p3_2ss13TC17CT	MS.gene05122
lncRNA	.:MSTRG.48818.2	gra-MIR8782-p3_2ss13TC17CT	MS.gene05122
lncRNA	MS.gene85472:MSTRG.125814.1	gra-MIR8782-p3_2ss13TC17CT	MS.gene05122
circRNA	ciRNA36	gra-MIR8782-p3_2ss13TC17CT	MS.gene05122
circRNA	circRNA120	gra-MIR8782-p3_2ss13TC17CT	MS.gene05122
circRNA	circRNA122	gra-MIR8782-p3_2ss13TC17CT	MS.gene05122
circRNA	circRNA130	gra-MIR8782-p3_2ss13TC17CT	MS.gene05122
circRNA	circRNA171	gra-MIR8782-p3_2ss13TC17CT	MS.gene05122
circRNA	circRNA193	gra-MIR8782-p3_2ss13TC17CT	MS.gene05122
circRNA	circRNA210	gra-MIR8782-p3_2ss13TC17CT	MS.gene05122
circRNA	circRNA247	gra-MIR8782-p3_2ss13TC17CT	MS.gene05122
circRNA	circRNA297	gra-MIR8782-p3_2ss13TC17CT	MS.gene05122
circRNA	circRNA303	gra-MIR8782-p3_2ss13TC17CT	MS.gene05122
circRNA	circRNA32	gra-MIR8782-p3_2ss13TC17CT	MS.gene05122
lncRNA	.:MSTRG.100041.2	gra-MIR8782-p3_2ss13TC17CT	MS.gene004512
lncRNA	MS.gene94703:MSTRG.131549.1	gra-MIR8782-p3_2ss13TC17CT	MS.gene004512
lncRNA	MS.gene029025:MSTRG.36622.1	gra-MIR8782-p3_2ss13TC17CT	MS.gene004512
lncRNA	MS.gene45098:MSTRG.98746.3	gra-MIR8782-p3_2ss13TC17CT	MS.gene004512
lncRNA	.:MSTRG.110357.3	gra-MIR8782-p3_2ss13TC17CT	MS.gene004512
lncRNA	.:MSTRG.138863.1	gra-MIR8782-p3_2ss13TC17CT	MS.gene004512
lncRNA	MS.gene064969:MSTRG.23786.1	gra-MIR8782-p3_2ss13TC17CT	MS.gene004512
lncRNA	MS.gene48985:MSTRG.81702.1	gra-MIR8782-p3_2ss13TC17CT	MS.gene004512
lncRNA	.:MSTRG.21804.1	gra-MIR8782-p3_2ss13TC17CT	MS.gene004512
lncRNA	.:MSTRG.46149.1	gra-MIR8782-p3_2ss13TC17CT	MS.gene004512
lncRNA	.:MSTRG.54254.1	gra-MIR8782-p3_2ss13TC17CT	MS.gene004512
lncRNA	MS.gene81928:MSTRG.76606.1	gra-MIR8782-p3_2ss13TC17CT	MS.gene004512
lncRNA	MS.gene71296:MSTRG.53522.1	gra-MIR8782-p3_2ss13TC17CT	MS.gene004512
lncRNA	.:MSTRG.138099.1	gra-MIR8782-p3_2ss13TC17CT	MS.gene004512
lncRNA	.:MSTRG.132904.1	gra-MIR8782-p3_2ss13TC17CT	MS.gene004512
lncRNA	.:MSTRG.29161.1	gra-MIR8782-p3_2ss13TC17CT	MS.gene004512
lncRNA	.:MSTRG.116844.1	gra-MIR8782-p3_2ss13TC17CT	MS.gene004512
lncRNA	.:MSTRG.157696.1	gra-MIR8782-p3_2ss13TC17CT	MS.gene004512
lncRNA	MS.gene96017:MSTRG.41739.1	gra-MIR8782-p3_2ss13TC17CT	MS.gene004512
lncRNA	.:MSTRG.57233.1	gra-MIR8782-p3_2ss13TC17CT	MS.gene004512
lncRNA	MS.gene81487:MSTRG.117331.1	gra-MIR8782-p3_2ss13TC17CT	MS.gene004512
lncRNA	.:MSTRG.12057.1	gra-MIR8782-p3_2ss13TC17CT	MS.gene004512
lncRNA	.:MSTRG.127312.1	gra-MIR8782-p3_2ss13TC17CT	MS.gene004512
lncRNA	.:MSTRG.48818.2	gra-MIR8782-p3_2ss13TC17CT	MS.gene004512
lncRNA	MS.gene85472:MSTRG.125814.1	gra-MIR8782-p3_2ss13TC17CT	MS.gene004512
circRNA	ciRNA36	gra-MIR8782-p3_2ss13TC17CT	MS.gene004512
circRNA	circRNA120	gra-MIR8782-p3_2ss13TC17CT	MS.gene004512
circRNA	circRNA122	gra-MIR8782-p3_2ss13TC17CT	MS.gene004512
circRNA	circRNA130	gra-MIR8782-p3_2ss13TC17CT	MS.gene004512
circRNA	circRNA171	gra-MIR8782-p3_2ss13TC17CT	MS.gene004512
circRNA	circRNA193	gra-MIR8782-p3_2ss13TC17CT	MS.gene004512
circRNA	circRNA210	gra-MIR8782-p3_2ss13TC17CT	MS.gene004512
circRNA	circRNA247	gra-MIR8782-p3_2ss13TC17CT	MS.gene004512
circRNA	circRNA297	gra-MIR8782-p3_2ss13TC17CT	MS.gene004512
circRNA	circRNA303	gra-MIR8782-p3_2ss13TC17CT	MS.gene004512
circRNA	circRNA32	gra-MIR8782-p3_2ss13TC17CT	MS.gene004512
lncRNA	.:MSTRG.100041.2	gra-MIR8782-p3_2ss13TC17CT	MS.gene014428
lncRNA	MS.gene94703:MSTRG.131549.1	gra-MIR8782-p3_2ss13TC17CT	MS.gene014428
lncRNA	MS.gene029025:MSTRG.36622.1	gra-MIR8782-p3_2ss13TC17CT	MS.gene014428
lncRNA	MS.gene45098:MSTRG.98746.3	gra-MIR8782-p3_2ss13TC17CT	MS.gene014428
lncRNA	.:MSTRG.110357.3	gra-MIR8782-p3_2ss13TC17CT	MS.gene014428
lncRNA	.:MSTRG.138863.1	gra-MIR8782-p3_2ss13TC17CT	MS.gene014428
lncRNA	MS.gene064969:MSTRG.23786.1	gra-MIR8782-p3_2ss13TC17CT	MS.gene014428
lncRNA	MS.gene48985:MSTRG.81702.1	gra-MIR8782-p3_2ss13TC17CT	MS.gene014428
lncRNA	.:MSTRG.21804.1	gra-MIR8782-p3_2ss13TC17CT	MS.gene014428
lncRNA	.:MSTRG.46149.1	gra-MIR8782-p3_2ss13TC17CT	MS.gene014428
lncRNA	.:MSTRG.54254.1	gra-MIR8782-p3_2ss13TC17CT	MS.gene014428
lncRNA	MS.gene81928:MSTRG.76606.1	gra-MIR8782-p3_2ss13TC17CT	MS.gene014428
lncRNA	MS.gene71296:MSTRG.53522.1	gra-MIR8782-p3_2ss13TC17CT	MS.gene014428
lncRNA	.:MSTRG.138099.1	gra-MIR8782-p3_2ss13TC17CT	MS.gene014428
lncRNA	.:MSTRG.132904.1	gra-MIR8782-p3_2ss13TC17CT	MS.gene014428
lncRNA	.:MSTRG.29161.1	gra-MIR8782-p3_2ss13TC17CT	MS.gene014428
lncRNA	.:MSTRG.116844.1	gra-MIR8782-p3_2ss13TC17CT	MS.gene014428
lncRNA	.:MSTRG.157696.1	gra-MIR8782-p3_2ss13TC17CT	MS.gene014428
lncRNA	MS.gene96017:MSTRG.41739.1	gra-MIR8782-p3_2ss13TC17CT	MS.gene014428
lncRNA	.:MSTRG.57233.1	gra-MIR8782-p3_2ss13TC17CT	MS.gene014428
lncRNA	MS.gene81487:MSTRG.117331.1	gra-MIR8782-p3_2ss13TC17CT	MS.gene014428
lncRNA	.:MSTRG.12057.1	gra-MIR8782-p3_2ss13TC17CT	MS.gene014428
lncRNA	.:MSTRG.127312.1	gra-MIR8782-p3_2ss13TC17CT	MS.gene014428
lncRNA	.:MSTRG.48818.2	gra-MIR8782-p3_2ss13TC17CT	MS.gene014428
lncRNA	MS.gene85472:MSTRG.125814.1	gra-MIR8782-p3_2ss13TC17CT	MS.gene014428
circRNA	ciRNA36	gra-MIR8782-p3_2ss13TC17CT	MS.gene014428
circRNA	circRNA120	gra-MIR8782-p3_2ss13TC17CT	MS.gene014428
circRNA	circRNA122	gra-MIR8782-p3_2ss13TC17CT	MS.gene014428
circRNA	circRNA130	gra-MIR8782-p3_2ss13TC17CT	MS.gene014428
circRNA	circRNA171	gra-MIR8782-p3_2ss13TC17CT	MS.gene014428
circRNA	circRNA193	gra-MIR8782-p3_2ss13TC17CT	MS.gene014428
circRNA	circRNA210	gra-MIR8782-p3_2ss13TC17CT	MS.gene014428
circRNA	circRNA247	gra-MIR8782-p3_2ss13TC17CT	MS.gene014428
circRNA	circRNA297	gra-MIR8782-p3_2ss13TC17CT	MS.gene014428
circRNA	circRNA303	gra-MIR8782-p3_2ss13TC17CT	MS.gene014428
circRNA	circRNA32	gra-MIR8782-p3_2ss13TC17CT	MS.gene014428
lncRNA	.:MSTRG.100041.2	gra-MIR8782-p3_2ss13TC17CT	MS.gene95285
lncRNA	MS.gene94703:MSTRG.131549.1	gra-MIR8782-p3_2ss13TC17CT	MS.gene95285
lncRNA	MS.gene029025:MSTRG.36622.1	gra-MIR8782-p3_2ss13TC17CT	MS.gene95285
lncRNA	MS.gene45098:MSTRG.98746.3	gra-MIR8782-p3_2ss13TC17CT	MS.gene95285
lncRNA	.:MSTRG.110357.3	gra-MIR8782-p3_2ss13TC17CT	MS.gene95285
lncRNA	.:MSTRG.138863.1	gra-MIR8782-p3_2ss13TC17CT	MS.gene95285
lncRNA	MS.gene064969:MSTRG.23786.1	gra-MIR8782-p3_2ss13TC17CT	MS.gene95285
lncRNA	MS.gene48985:MSTRG.81702.1	gra-MIR8782-p3_2ss13TC17CT	MS.gene95285
lncRNA	.:MSTRG.21804.1	gra-MIR8782-p3_2ss13TC17CT	MS.gene95285
lncRNA	.:MSTRG.46149.1	gra-MIR8782-p3_2ss13TC17CT	MS.gene95285
lncRNA	.:MSTRG.54254.1	gra-MIR8782-p3_2ss13TC17CT	MS.gene95285
lncRNA	MS.gene81928:MSTRG.76606.1	gra-MIR8782-p3_2ss13TC17CT	MS.gene95285
lncRNA	MS.gene71296:MSTRG.53522.1	gra-MIR8782-p3_2ss13TC17CT	MS.gene95285
lncRNA	.:MSTRG.138099.1	gra-MIR8782-p3_2ss13TC17CT	MS.gene95285
lncRNA	.:MSTRG.132904.1	gra-MIR8782-p3_2ss13TC17CT	MS.gene95285
lncRNA	.:MSTRG.29161.1	gra-MIR8782-p3_2ss13TC17CT	MS.gene95285
lncRNA	.:MSTRG.116844.1	gra-MIR8782-p3_2ss13TC17CT	MS.gene95285
lncRNA	.:MSTRG.157696.1	gra-MIR8782-p3_2ss13TC17CT	MS.gene95285
lncRNA	MS.gene96017:MSTRG.41739.1	gra-MIR8782-p3_2ss13TC17CT	MS.gene95285
lncRNA	.:MSTRG.57233.1	gra-MIR8782-p3_2ss13TC17CT	MS.gene95285
lncRNA	MS.gene81487:MSTRG.117331.1	gra-MIR8782-p3_2ss13TC17CT	MS.gene95285
lncRNA	.:MSTRG.12057.1	gra-MIR8782-p3_2ss13TC17CT	MS.gene95285
lncRNA	.:MSTRG.127312.1	gra-MIR8782-p3_2ss13TC17CT	MS.gene95285
lncRNA	.:MSTRG.48818.2	gra-MIR8782-p3_2ss13TC17CT	MS.gene95285
lncRNA	MS.gene85472:MSTRG.125814.1	gra-MIR8782-p3_2ss13TC17CT	MS.gene95285
circRNA	ciRNA36	gra-MIR8782-p3_2ss13TC17CT	MS.gene95285
circRNA	circRNA120	gra-MIR8782-p3_2ss13TC17CT	MS.gene95285
circRNA	circRNA122	gra-MIR8782-p3_2ss13TC17CT	MS.gene95285
circRNA	circRNA130	gra-MIR8782-p3_2ss13TC17CT	MS.gene95285
circRNA	circRNA171	gra-MIR8782-p3_2ss13TC17CT	MS.gene95285
circRNA	circRNA193	gra-MIR8782-p3_2ss13TC17CT	MS.gene95285
circRNA	circRNA210	gra-MIR8782-p3_2ss13TC17CT	MS.gene95285
circRNA	circRNA247	gra-MIR8782-p3_2ss13TC17CT	MS.gene95285
circRNA	circRNA297	gra-MIR8782-p3_2ss13TC17CT	MS.gene95285
circRNA	circRNA303	gra-MIR8782-p3_2ss13TC17CT	MS.gene95285
circRNA	circRNA32	gra-MIR8782-p3_2ss13TC17CT	MS.gene95285
lncRNA	.:MSTRG.100041.2	gra-MIR8782-p3_2ss13TC17CT	MS.gene061479
lncRNA	MS.gene94703:MSTRG.131549.1	gra-MIR8782-p3_2ss13TC17CT	MS.gene061479
lncRNA	MS.gene029025:MSTRG.36622.1	gra-MIR8782-p3_2ss13TC17CT	MS.gene061479
lncRNA	MS.gene45098:MSTRG.98746.3	gra-MIR8782-p3_2ss13TC17CT	MS.gene061479
lncRNA	.:MSTRG.110357.3	gra-MIR8782-p3_2ss13TC17CT	MS.gene061479
lncRNA	.:MSTRG.138863.1	gra-MIR8782-p3_2ss13TC17CT	MS.gene061479
lncRNA	MS.gene064969:MSTRG.23786.1	gra-MIR8782-p3_2ss13TC17CT	MS.gene061479
lncRNA	MS.gene48985:MSTRG.81702.1	gra-MIR8782-p3_2ss13TC17CT	MS.gene061479
lncRNA	.:MSTRG.21804.1	gra-MIR8782-p3_2ss13TC17CT	MS.gene061479
lncRNA	.:MSTRG.46149.1	gra-MIR8782-p3_2ss13TC17CT	MS.gene061479
lncRNA	.:MSTRG.54254.1	gra-MIR8782-p3_2ss13TC17CT	MS.gene061479
lncRNA	MS.gene81928:MSTRG.76606.1	gra-MIR8782-p3_2ss13TC17CT	MS.gene061479
lncRNA	MS.gene71296:MSTRG.53522.1	gra-MIR8782-p3_2ss13TC17CT	MS.gene061479
lncRNA	.:MSTRG.138099.1	gra-MIR8782-p3_2ss13TC17CT	MS.gene061479
lncRNA	.:MSTRG.132904.1	gra-MIR8782-p3_2ss13TC17CT	MS.gene061479
lncRNA	.:MSTRG.29161.1	gra-MIR8782-p3_2ss13TC17CT	MS.gene061479
lncRNA	.:MSTRG.116844.1	gra-MIR8782-p3_2ss13TC17CT	MS.gene061479
lncRNA	.:MSTRG.157696.1	gra-MIR8782-p3_2ss13TC17CT	MS.gene061479
lncRNA	MS.gene96017:MSTRG.41739.1	gra-MIR8782-p3_2ss13TC17CT	MS.gene061479
lncRNA	.:MSTRG.57233.1	gra-MIR8782-p3_2ss13TC17CT	MS.gene061479
lncRNA	MS.gene81487:MSTRG.117331.1	gra-MIR8782-p3_2ss13TC17CT	MS.gene061479
lncRNA	.:MSTRG.12057.1	gra-MIR8782-p3_2ss13TC17CT	MS.gene061479
lncRNA	.:MSTRG.127312.1	gra-MIR8782-p3_2ss13TC17CT	MS.gene061479
lncRNA	.:MSTRG.48818.2	gra-MIR8782-p3_2ss13TC17CT	MS.gene061479
lncRNA	MS.gene85472:MSTRG.125814.1	gra-MIR8782-p3_2ss13TC17CT	MS.gene061479
circRNA	ciRNA36	gra-MIR8782-p3_2ss13TC17CT	MS.gene061479
circRNA	circRNA120	gra-MIR8782-p3_2ss13TC17CT	MS.gene061479
circRNA	circRNA122	gra-MIR8782-p3_2ss13TC17CT	MS.gene061479
circRNA	circRNA130	gra-MIR8782-p3_2ss13TC17CT	MS.gene061479
circRNA	circRNA171	gra-MIR8782-p3_2ss13TC17CT	MS.gene061479
circRNA	circRNA193	gra-MIR8782-p3_2ss13TC17CT	MS.gene061479
circRNA	circRNA210	gra-MIR8782-p3_2ss13TC17CT	MS.gene061479
circRNA	circRNA247	gra-MIR8782-p3_2ss13TC17CT	MS.gene061479
circRNA	circRNA297	gra-MIR8782-p3_2ss13TC17CT	MS.gene061479
circRNA	circRNA303	gra-MIR8782-p3_2ss13TC17CT	MS.gene061479
circRNA	circRNA32	gra-MIR8782-p3_2ss13TC17CT	MS.gene061479
lncRNA	.:MSTRG.100041.2	gra-MIR8782-p3_2ss13TC17CT	MS.gene063373
lncRNA	MS.gene94703:MSTRG.131549.1	gra-MIR8782-p3_2ss13TC17CT	MS.gene063373
lncRNA	MS.gene029025:MSTRG.36622.1	gra-MIR8782-p3_2ss13TC17CT	MS.gene063373
lncRNA	MS.gene45098:MSTRG.98746.3	gra-MIR8782-p3_2ss13TC17CT	MS.gene063373
lncRNA	.:MSTRG.110357.3	gra-MIR8782-p3_2ss13TC17CT	MS.gene063373
lncRNA	.:MSTRG.138863.1	gra-MIR8782-p3_2ss13TC17CT	MS.gene063373
lncRNA	MS.gene064969:MSTRG.23786.1	gra-MIR8782-p3_2ss13TC17CT	MS.gene063373
lncRNA	MS.gene48985:MSTRG.81702.1	gra-MIR8782-p3_2ss13TC17CT	MS.gene063373
lncRNA	.:MSTRG.21804.1	gra-MIR8782-p3_2ss13TC17CT	MS.gene063373
lncRNA	.:MSTRG.46149.1	gra-MIR8782-p3_2ss13TC17CT	MS.gene063373
lncRNA	.:MSTRG.54254.1	gra-MIR8782-p3_2ss13TC17CT	MS.gene063373
lncRNA	MS.gene81928:MSTRG.76606.1	gra-MIR8782-p3_2ss13TC17CT	MS.gene063373
lncRNA	MS.gene71296:MSTRG.53522.1	gra-MIR8782-p3_2ss13TC17CT	MS.gene063373
lncRNA	.:MSTRG.138099.1	gra-MIR8782-p3_2ss13TC17CT	MS.gene063373
lncRNA	.:MSTRG.132904.1	gra-MIR8782-p3_2ss13TC17CT	MS.gene063373
lncRNA	.:MSTRG.29161.1	gra-MIR8782-p3_2ss13TC17CT	MS.gene063373
lncRNA	.:MSTRG.116844.1	gra-MIR8782-p3_2ss13TC17CT	MS.gene063373
lncRNA	.:MSTRG.157696.1	gra-MIR8782-p3_2ss13TC17CT	MS.gene063373
lncRNA	MS.gene96017:MSTRG.41739.1	gra-MIR8782-p3_2ss13TC17CT	MS.gene063373
lncRNA	.:MSTRG.57233.1	gra-MIR8782-p3_2ss13TC17CT	MS.gene063373
lncRNA	MS.gene81487:MSTRG.117331.1	gra-MIR8782-p3_2ss13TC17CT	MS.gene063373
lncRNA	.:MSTRG.12057.1	gra-MIR8782-p3_2ss13TC17CT	MS.gene063373
lncRNA	.:MSTRG.127312.1	gra-MIR8782-p3_2ss13TC17CT	MS.gene063373
lncRNA	.:MSTRG.48818.2	gra-MIR8782-p3_2ss13TC17CT	MS.gene063373
lncRNA	MS.gene85472:MSTRG.125814.1	gra-MIR8782-p3_2ss13TC17CT	MS.gene063373
circRNA	ciRNA36	gra-MIR8782-p3_2ss13TC17CT	MS.gene063373
circRNA	circRNA120	gra-MIR8782-p3_2ss13TC17CT	MS.gene063373
circRNA	circRNA122	gra-MIR8782-p3_2ss13TC17CT	MS.gene063373
circRNA	circRNA130	gra-MIR8782-p3_2ss13TC17CT	MS.gene063373
circRNA	circRNA171	gra-MIR8782-p3_2ss13TC17CT	MS.gene063373
circRNA	circRNA193	gra-MIR8782-p3_2ss13TC17CT	MS.gene063373
circRNA	circRNA210	gra-MIR8782-p3_2ss13TC17CT	MS.gene063373
circRNA	circRNA247	gra-MIR8782-p3_2ss13TC17CT	MS.gene063373
circRNA	circRNA297	gra-MIR8782-p3_2ss13TC17CT	MS.gene063373
circRNA	circRNA303	gra-MIR8782-p3_2ss13TC17CT	MS.gene063373
circRNA	circRNA32	gra-MIR8782-p3_2ss13TC17CT	MS.gene063373
lncRNA	.:MSTRG.100041.2	gra-MIR8782-p3_2ss13TC17CT	MS.gene033060
lncRNA	MS.gene94703:MSTRG.131549.1	gra-MIR8782-p3_2ss13TC17CT	MS.gene033060
lncRNA	MS.gene029025:MSTRG.36622.1	gra-MIR8782-p3_2ss13TC17CT	MS.gene033060
lncRNA	MS.gene45098:MSTRG.98746.3	gra-MIR8782-p3_2ss13TC17CT	MS.gene033060
lncRNA	.:MSTRG.110357.3	gra-MIR8782-p3_2ss13TC17CT	MS.gene033060
lncRNA	.:MSTRG.138863.1	gra-MIR8782-p3_2ss13TC17CT	MS.gene033060
lncRNA	MS.gene064969:MSTRG.23786.1	gra-MIR8782-p3_2ss13TC17CT	MS.gene033060
lncRNA	MS.gene48985:MSTRG.81702.1	gra-MIR8782-p3_2ss13TC17CT	MS.gene033060
lncRNA	.:MSTRG.21804.1	gra-MIR8782-p3_2ss13TC17CT	MS.gene033060
lncRNA	.:MSTRG.46149.1	gra-MIR8782-p3_2ss13TC17CT	MS.gene033060
lncRNA	.:MSTRG.54254.1	gra-MIR8782-p3_2ss13TC17CT	MS.gene033060
lncRNA	MS.gene81928:MSTRG.76606.1	gra-MIR8782-p3_2ss13TC17CT	MS.gene033060
lncRNA	MS.gene71296:MSTRG.53522.1	gra-MIR8782-p3_2ss13TC17CT	MS.gene033060
lncRNA	.:MSTRG.138099.1	gra-MIR8782-p3_2ss13TC17CT	MS.gene033060
lncRNA	.:MSTRG.132904.1	gra-MIR8782-p3_2ss13TC17CT	MS.gene033060
lncRNA	.:MSTRG.29161.1	gra-MIR8782-p3_2ss13TC17CT	MS.gene033060
lncRNA	.:MSTRG.116844.1	gra-MIR8782-p3_2ss13TC17CT	MS.gene033060
lncRNA	.:MSTRG.157696.1	gra-MIR8782-p3_2ss13TC17CT	MS.gene033060
lncRNA	MS.gene96017:MSTRG.41739.1	gra-MIR8782-p3_2ss13TC17CT	MS.gene033060
lncRNA	.:MSTRG.57233.1	gra-MIR8782-p3_2ss13TC17CT	MS.gene033060
lncRNA	MS.gene81487:MSTRG.117331.1	gra-MIR8782-p3_2ss13TC17CT	MS.gene033060
lncRNA	.:MSTRG.12057.1	gra-MIR8782-p3_2ss13TC17CT	MS.gene033060
lncRNA	.:MSTRG.127312.1	gra-MIR8782-p3_2ss13TC17CT	MS.gene033060
lncRNA	.:MSTRG.48818.2	gra-MIR8782-p3_2ss13TC17CT	MS.gene033060
lncRNA	MS.gene85472:MSTRG.125814.1	gra-MIR8782-p3_2ss13TC17CT	MS.gene033060
circRNA	ciRNA36	gra-MIR8782-p3_2ss13TC17CT	MS.gene033060
circRNA	circRNA120	gra-MIR8782-p3_2ss13TC17CT	MS.gene033060
circRNA	circRNA122	gra-MIR8782-p3_2ss13TC17CT	MS.gene033060
circRNA	circRNA130	gra-MIR8782-p3_2ss13TC17CT	MS.gene033060
circRNA	circRNA171	gra-MIR8782-p3_2ss13TC17CT	MS.gene033060
circRNA	circRNA193	gra-MIR8782-p3_2ss13TC17CT	MS.gene033060
circRNA	circRNA210	gra-MIR8782-p3_2ss13TC17CT	MS.gene033060
circRNA	circRNA247	gra-MIR8782-p3_2ss13TC17CT	MS.gene033060
circRNA	circRNA297	gra-MIR8782-p3_2ss13TC17CT	MS.gene033060
circRNA	circRNA303	gra-MIR8782-p3_2ss13TC17CT	MS.gene033060
circRNA	circRNA32	gra-MIR8782-p3_2ss13TC17CT	MS.gene033060
lncRNA	MS.gene05222:MSTRG.112200.1	mdm-miR482b_R-1_2ss11CG20TG	MS.gene94703
lncRNA	.:MSTRG.96860.1	mdm-miR482b_R-1_2ss11CG20TG	MS.gene94703
lncRNA	MS.gene05222:MSTRG.112200.1	mdm-miR482b_R-1_2ss11CG20TG	MS.gene94688
lncRNA	.:MSTRG.96860.1	mdm-miR482b_R-1_2ss11CG20TG	MS.gene94688
lncRNA	MS.gene045713:MSTRG.37630.1	mtr-MIR2678-p5	MS.gene061479
lncRNA	.:MSTRG.121522.1	mtr-MIR2678-p5	MS.gene061479
lncRNA	MS.gene22838:MSTRG.133938.1	mtr-MIR2678-p5	MS.gene061479
lncRNA	.:MSTRG.43704.1	mtr-MIR2678-p5	MS.gene061479
lncRNA	MS.gene059623:MSTRG.112745.3	mtr-MIR2678-p5	MS.gene061479
lncRNA	.:MSTRG.118861.1	mtr-MIR2678-p5	MS.gene061479
circRNA	ciRNA13	mtr-MIR2678-p5	MS.gene061479
circRNA	circRNA36	mtr-MIR2678-p5	MS.gene061479
lncRNA	MS.gene045713:MSTRG.37630.1	mtr-MIR2678-p5	MS.gene94688
lncRNA	.:MSTRG.121522.1	mtr-MIR2678-p5	MS.gene94688
lncRNA	MS.gene22838:MSTRG.133938.1	mtr-MIR2678-p5	MS.gene94688
lncRNA	.:MSTRG.43704.1	mtr-MIR2678-p5	MS.gene94688
lncRNA	MS.gene059623:MSTRG.112745.3	mtr-MIR2678-p5	MS.gene94688
lncRNA	.:MSTRG.118861.1	mtr-MIR2678-p5	MS.gene94688
circRNA	ciRNA13	mtr-MIR2678-p5	MS.gene94688
circRNA	circRNA36	mtr-MIR2678-p5	MS.gene94688
lncRNA	MS.gene045713:MSTRG.37630.1	mtr-MIR2678-p5	MS.gene032186
lncRNA	.:MSTRG.121522.1	mtr-MIR2678-p5	MS.gene032186
lncRNA	MS.gene22838:MSTRG.133938.1	mtr-MIR2678-p5	MS.gene032186
lncRNA	.:MSTRG.43704.1	mtr-MIR2678-p5	MS.gene032186
lncRNA	MS.gene059623:MSTRG.112745.3	mtr-MIR2678-p5	MS.gene032186
lncRNA	.:MSTRG.118861.1	mtr-MIR2678-p5	MS.gene032186
circRNA	ciRNA13	mtr-MIR2678-p5	MS.gene032186
circRNA	circRNA36	mtr-MIR2678-p5	MS.gene032186
lncRNA	MS.gene045713:MSTRG.37630.1	mtr-MIR2678-p5	MS.gene052004
lncRNA	.:MSTRG.121522.1	mtr-MIR2678-p5	MS.gene052004
lncRNA	MS.gene22838:MSTRG.133938.1	mtr-MIR2678-p5	MS.gene052004
lncRNA	.:MSTRG.43704.1	mtr-MIR2678-p5	MS.gene052004
lncRNA	MS.gene059623:MSTRG.112745.3	mtr-MIR2678-p5	MS.gene052004
lncRNA	.:MSTRG.118861.1	mtr-MIR2678-p5	MS.gene052004
circRNA	ciRNA13	mtr-MIR2678-p5	MS.gene052004
circRNA	circRNA36	mtr-MIR2678-p5	MS.gene052004
lncRNA	.:MSTRG.75716.1	mtr-miR172c-5p	MS.gene032177
lncRNA	.:MSTRG.85199.1	mtr-miR172c-5p	MS.gene032177
lncRNA	MS.gene043819:MSTRG.33343.1	mtr-miR396a-5p	MS.gene035612
lncRNA	MS.gene63918:MSTRG.92275.3	mtr-miR396a-5p	MS.gene035612
circRNA	circRNA211	mtr-miR396a-5p	MS.gene035612
lncRNA	MS.gene043819:MSTRG.33343.1	mtr-miR396a-5p	MS.gene58072
lncRNA	MS.gene63918:MSTRG.92275.3	mtr-miR396a-5p	MS.gene58072
circRNA	circRNA211	mtr-miR396a-5p	MS.gene58072
lncRNA	MS.gene043819:MSTRG.33343.1	mtr-miR396a-5p	MS.gene000622
lncRNA	MS.gene63918:MSTRG.92275.3	mtr-miR396a-5p	MS.gene000622
circRNA	circRNA211	mtr-miR396a-5p	MS.gene000622
lncRNA	MS.gene043819:MSTRG.33343.1	mtr-miR396a-5p	MS.gene32371
lncRNA	MS.gene63918:MSTRG.92275.3	mtr-miR396a-5p	MS.gene32371
circRNA	circRNA211	mtr-miR396a-5p	MS.gene32371
lncRNA	MS.gene043819:MSTRG.33343.1	mtr-miR396a-5p	MS.gene53345
lncRNA	MS.gene63918:MSTRG.92275.3	mtr-miR396a-5p	MS.gene53345
circRNA	circRNA211	mtr-miR396a-5p	MS.gene53345
